# Supplementary material for: Peritumoral radiomics features predict distant metastasis in locally advanced NSCLC
Source: PLoS One. 2018 Nov 2;13(11):e0206108. doi: 10.1371/journal.pone.0206108 (PMC6214508; doi:10.1371/journal.pone.0206108)
Supplement: S5 File — (PDF) [file pone.0206108.s005.pdf]

X    general\_info\_BoundingBox

1 (6, 6, 5, 10, 10, 12)  
2 (6, 6, 6, 17, 18, 15)  
3 (6, 6, 5, 6, 10, 5)  
4 (6, 6, 5, 16, 18, 19)  
5 (6, 7, 6, 7, 6, 5)  
6 (6, 6, 6, 9, 9, 7)  
8 (5, 6, 6, 10, 8, 3)  
9 (6, 6, 6, 13, 11, 10)  
10 (6, 6, 6, 19, 16, 13)  
11 (5, 6, 6, 24, 18, 22)  
12 (6, 6, 5, 8, 11, 8)  
13 (6, 6, 6, 12, 13, 17)  
14 (6, 6, 6, 17, 15, 14)  
15 (5, 5, 6, 12, 14, 10)  
16 (5, 6, 6, 12, 10, 11)  
17 (6, 6, 6, 33, 27, 34)  
18 (6, 6, 6, 13, 7, 8)  
19 (6, 6, 5, 18, 17, 19)  
20 (6, 6, 6, 8, 9, 9)  
21 (6, 5, 6, 19, 21, 22)  
22 (6, 6, 6, 23, 22, 32)  
23 (6, 6, 6, 13, 10, 19)  
24 (5, 5, 6, 18, 26, 29)  
25 (6, 6, 6, 8, 8, 7)  
26 (6, 6, 5, 20, 20, 14)  
27 (6, 6, 6, 13, 16, 8)  
29 (5, 6, 5, 17, 25, 18)  
30 (5, 5, 6, 25, 30, 28)  
31 (5, 6, 5, 22, 22, 26)  
32 (6, 6, 6, 17, 18, 18)  
33 (6, 6, 6, 19, 26, 25)  
34 (6, 5, 6, 34, 32, 30)  
35 (6, 5, 6, 16, 15, 16)  
36 (6, 5, 6, 3, 3, 3)  
37 (6, 6, 5, 6, 7, 8)  
38 (6, 6, 6, 15, 15, 13)  
39 (5, 5, 6, 24, 30, 28)  
40 (6, 6, 6, 20, 23, 16)  
41 (6, 6, 5, 9, 12, 8)  
42 (6, 6, 6, 12, 11, 11)  
43 (6, 5, 6, 13, 17, 14)  
44 (6, 6, 6, 14, 11, 10)  
45 (5, 6, 6, 23, 12, 12)  
46 (6, 5, 6, 11, 12, 13)  
48 (5, 6, 5, 17, 15, 12)  
49 (5, 6, 6, 30, 33, 24)  
50 (6, 5, 2, 20, 19, 26)  
51 (6, 5, 5, 8, 8, 7)  
52 (6, 6, 5, 3, 3, 4)  
53 (6, 5, 6, 6, 9, 8)  
54 (6, 6, 5, 27, 23, 23)  
55 (5, 5, 6, 10, 10, 9)  
56 (6, 6, 6, 17, 21, 28)  
57 (6, 6, 5, 9, 9, 9)  
58 (5, 6, 6, 29, 43, 32)  
59 (6, 6, 5, 10, 11, 9)  
60 (5, 6, 6, 24, 18, 19)  
61 (6, 6, 5, 16, 10, 13)  
62 (6, 6, 5, 10, 11, 10)  
63 (6, 6, 6, 14, 10, 7)  
64 (6, 5, 5, 15, 17, 14)  
65 (5, 6, 6, 25, 26, 31)  
66 (6, 6, 6, 21, 19, 34)  
67 (6, 7, 6, 21, 24, 17)  
68 (6, 6, 6, 6, 5, 4)  
69 (5, 5, 5, 21, 15, 14)  
70 (6, 6, 6, 8, 6, 6)  
71 (5, 6, 6, 23, 19, 21)  
72 (6, 6, 6, 7, 7, 7)  
73 (6, 6, 6, 17, 19, 18)  
74 (6, 6, 5, 26, 23, 20)  
75 (5, 6, 6, 12, 12, 10)  
76 (6, 6, 6, 24, 29, 27)  
77 (6, 5, 6, 34, 37, 35)  
78 (6, 6, 5, 35, 38, 34)  
79 (5, 6, 6, 13, 15, 10)  
80 (6, 7, 6, 13, 14, 8)  
81 (6, 5, 6, 8, 8, 9)  
82 (6, 5, 5, 19, 17, 10)  
83 (5, 5, 5, 19, 27, 20)  
84 (6, 6, 6, 10, 9, 4)  
85 (8, 6, 6, 15, 21, 9)  
86 (5, 6, 6, 21, 22, 26)  
87 (6, 5, 6, 4, 5, 3)  
88 (5, 5, 6, 23, 25, 24)  
89 (6, 6, 6, 31, 21, 21)  
90 (6, 6, 6, 10, 9, 9)  
91 (5, 6, 6, 14, 24, 11)  
92 (7, 6, 6, 5, 7, 3)  
93 (7, 6, 6, 4, 4, 1)  
94 (6, 6, 5, 27, 31, 19)  
95 (6, 6, 6, 9, 10, 12)  
96 (6, 5, 6, 11, 13, 9)  
107 (6, 6, 6, 22, 24, 21)  
108 (6, 6, 5, 24, 27, 26)  
112 (6, 6, 6, 5, 5, 5)  
114 (6, 6, 6, 14, 12, 11)  
126 (6, 6, 5, 3, 4, 4)  
135 (6, 5, 5, 18, 11, 14)  
139 (6, 6, 5, 15, 12, 10)

[illegible]



| general_info_VoxelNum | original_shape_Maximum3DDiameter | original_shape_Compactness2 | original_shape_Maximum2DDiameterSlice | original_shape_Sphericity | original_shape_Compactness1 | original_shape_Elongation |
|-----------------------|----------------------------------|-----------------------------|---------------------------------------|---------------------------|-----------------------------|---------------------------|
| 361                   | 33.67491648                      | 0.51122997                  | 30                                    | 0.799598742               | 0.037932113                 | 1.09688974                |
| 1403                  | 56.68333088                      | 0.370168664                 | 55.07267925                           | 0.718014504               | 0.032277412                 | 1.109728469               |
| 177                   | 28.61817604                      | 0.467457488                 | 27.16615541                           | 0.77609349                | 0.036271869                 | 1.524308363               |
| 1933                  | 69.84268036                      | 0.331811698                 | 55.15432893                           | 0.692304622               | 0.030559393                 | 1.208858578               |
| 101                   | 20.34698995                      | 0.636533913                 | 18.24828759                           | 0.860215339               | 0.042326236                 | 1.096013263               |
| 244                   | 27.49545417                      | 0.560355838                 | 24.73863375                           | 0.824431607               | 0.039712829                 | 1.039235613               |
| 70                    | 33                               | 0.332420856                 | 24.18677324                           | 0.69272802                | 0.030587431                 | 2.563770718               |
| 401                   | 39.79949748                      | 0.35737926                  | 34.20526275                           | 0.709648216               | 0.031714915                 | 1.412741723               |
| 1476                  | 56.60388679                      | 0.42821041                  | 53.16013544                           | 0.753735679               | 0.034715825                 | 1.210410642               |
| 2319                  | 82.8673639                       | 0.281809415                 | 54.33231083                           | 0.655619455               | 0.028162852                 | 1.553324876               |
| 376                   | 38.06573262                      | 0.499394215                 | 33.54101966                           | 0.793379855               | 0.037490448                 | 1.303889034               |
| 757                   | 65.520989                        | 0.326400762                 | 36.24913792                           | 0.688520784               | 0.030309199                 | 1.706470251               |
| 1366                  | 49.56813493                      | 0.445935898                 | 48.46648326                           | 0.763995519               | 0.035427058                 | 1.082003604               |
| 528                   | 40.91454509                      | 0.447131405                 | 34.20526275                           | 0.76467764                | 0.035474515                 | 1.322133355               |
| 364                   | 44.29446918                      | 0.275834025                 | 27.65863337                           | 0.650952469               | 0.027862674                 | 1.821897805               |
| 10828                 | 121.2311841                      | 0.250059051                 | 96.18731725                           | 0.63001012                | 0.026528956                 | 1.323849293               |
| 217                   | 40.02499219                      | 0.288487272                 | 36.49657518                           | 0.660757679               | 0.028494576                 | 1.635484725               |
| 1552                  | 78.74642849                      | 0.352928861                 | 49.65883607                           | 0.706690183               | 0.031516825                 | 2.043457768               |
| 182                   | 32.31098884                      | 0.410420878                 | 21.63330765                           | 0.743149999               | 0.03398706                  | 1.679612091               |
| 2774                  | 78.05767099                      | 0.393394622                 | 52.39274759                           | 0.732728031               | 0.033274619                 | 1.475362                  |
| 5075                  | 98.49873096                      | 0.239658785                 | 64.89992296                           | 0.621151852               | 0.025971412                 | 1.703593114               |
| 909                   | 61.91930232                      | 0.263825696                 | 37.94733192                           | 0.641365652               | 0.02724943                  | 1.461930169               |
| 2920                  | 89.04493248                      | 0.236188114                 | 69.97142274                           | 0.618138811               | 0.02578267                  | 1.248948112               |
| 133                   | 31.46426545                      | 0.258862504                 | 25.8069758                            | 0.637318291               | 0.0269919                   | 1.330698466               |
| 960                   | 66.13622306                      | 0.170769967                 | 53.07541804                           | 0.55480091                | 0.021923234                 | 1.407649687               |
| 302                   | 52.73518749                      | 0.376400322                 | 40.24922359                           | 0.722021277               | 0.032547967                 | 1.579700074               |
| 2289                  | 74.45804188                      | 0.278984721                 | 69.26037828                           | 0.653421579               | 0.028021352                 | 1.026792046               |
| 3895                  | 103.3585991                      | 0.162751618                 | 89.49860334                           | 0.545977951               | 0.021402354                 | 1.543579385               |
| 3716                  | 86.37708029                      | 0.223500616                 | 61.84658438                           | 0.606866142               | 0.025080618                 | 1.323100778               |
| 1693                  | 59.16924877                      | 0.356828331                 | 51.35172831                           | 0.709283368               | 0.03169046                  | 1.076214663               |
| 4201                  | 96.04686356                      | 0.314492221                 | 64.13267498                           | 0.680043409               | 0.029751155                 | 1.757601844               |
| 8833                  | 120.2247895                      | 0.259987054                 | 95.34149149                           | 0.638239837               | 0.027050465                 | 1.197414334               |
| 1389                  | 57.31491952                      | 0.437799742                 | 48.46648326                           | 0.759320574               | 0.035102385                 | 1.24537177                |
| 15                    | 9                                | 0.958577381                 | 6.708203932                           | 0.9859973                 | 0.051941258                 | 1.120352613               |
| 113                   | 27.82085549                      | 0.435882189                 | 15                                    | 0.758210349               | 0.035025427                 | 1.893719217               |
| 1334                  | 52.39274759                      | 0.469807866                 | 45.79301257                           | 0.77739205                | 0.036362942                 | 1.04882128                |
| 6691                  | 94.58329662                      | 0.301777911                 | 81.88406438                           | 0.670752782               | 0.02914356                  | 1.136146565               |
| 3032                  | 77.12976079                      | 0.433900777                 | 64.76109943                           | 0.757059725               | 0.034945728                 | 1.161898007               |
| 321                   | 36.24913792                      | 0.348783421                 | 33.54101966                           | 0.703912392               | 0.031331183                 | 1.279809145               |
| 537                   | 37.70941527                      | 0.472534019                 | 35.11409973                           | 0.778892807               | 0.036468291                 | 1.066321222               |
| 715                   | 49.56813493                      | 0.235257579                 | 49.47726751                           | 0.617325961               | 0.025731831                 | 1.132999029               |
| 381                   | 40.47221269                      | 0.384585538                 | 40.02499219                           | 0.727217492               | 0.032899599                 | 1.054755818               |
| 824                   | 66.2721661                       | 0.337462043                 | 66.2721661                            | 0.696212223               | 0.030818489                 | 1.383119918               |
| 439                   | 47.24404724                      | 0.379676461                 | 30.59411708                           | 0.724110021               | 0.032689307                 | 1.565310429               |
| 1115                  | 56.68333088                      | 0.404426695                 | 45.69463864                           | 0.739514349               | 0.033737957                 | 1.108281313               |
| 6122                  | 114.628939                       | 0.232727165                 | 84.53401682                           | 0.615104673               | 0.025593072                 | 1.410374521               |
| 2746                  | 78.40280607                      | 0.159278208                 | 62.42595614                           | 0.542065941               | 0.021117274                 | 1.346112166               |
| 228                   | 26.32489316                      | 0.612776809                 | 23.43074903                           | 0.849377542               | 0.041528863                 | 1.048126122               |
| 22                    | 11.22497216                      | 0.929771853                 | 6.708203932                           | 0.976020183               | 0.05115488                  | 1.424457904               |
| 146                   | 27                               | 0.423798159                 | 21.21320344                           | 0.751137922               | 0.034536507                 | 1.584030679               |
| 4080                  | 83.03011502                      | 0.363990652                 | 75.53806987                           | 0.713997586               | 0.032006928                 | 1.190408773               |
| 403                   | 31.46426545                      | 0.668339159                 | 27.65863337                           | 0.874310383               | 0.04337079                  | 1.182603243               |
| 3195                  | 82.97590012                      | 0.313574072                 | 54.74486277                           | 0.679380976               | 0.029707695                 | 1.539945657               |
| 239                   | 28.93095228                      | 0.5153555                   | 26.83281573                           | 0.801743852               | 0.038084857                 | 1.163046593               |
| 11306                 | 151.3737097                      | 0.2557245                   | 124.7798061                           | 0.634732564               | 0.026827799                 | 1.882426395               |
| 335                   | 32.86335345                      | 0.39776925                  | 29.54657341                           | 0.735434053               | 0.033459117                 | 1.112985964               |
| 872                   | 97.85703858                      | 0.099191859                 | 53.16013544                           | 0.462905147               | 0.016708478                 | 2.157499729               |
| 458                   | 60.29925373                      | 0.164626671                 | 43.26661531                           | 0.548066679               | 0.021525288                 | 1.865080299               |
| 354                   | 33.67491648                      | 0.346110953                 | 28.46049894                           | 0.702109929               | 0.031210918                 | 1.137971474               |
| 466                   | 40.47221269                      | 0.564684729                 | 40.02499219                           | 0.826549145               | 0.03986593                  | 1.372527415               |
| 1455                  | 54.41507144                      | 0.463251166                 | 47.4341649                            | 0.773758632               | 0.036108308                 | 1.128568934               |
| 6776                  | 99.94998749                      | 0.31531787                  | 70.22819946                           | 0.680638004               | 0.029790183                 | 1.408266434               |
| 4074                  | 112.3699248                      | 0.270733293                 | 66.61080993                           | 0.646915001               | 0.027603853                 | 1.706231749               |
| 1782                  | 71.62401832                      | 0.224250859                 | 66.61080993                           | 0.607544423               | 0.025122678                 | 1.264645033               |
| 53                    | 15.58845727                      | 0.795776111                 | 15.29705854                           | 0.926681087               | 0.047325404                 | 1.203293211               |
| 1152                  | 67.94850992                      | 0.239349661                 | 56.92099788                           | 0.620884673               | 0.025954656                 | 1.604431244               |
| 105                   | 23.62202362                      | 0.434783357                 | 18.97366596                           | 0.757572679               | 0.034981251                 | 1.25592388                |
| 3467                  | 72.18725649                      | 0.490816637                 | 63.5688603                            | 0.788811243               | 0.037167086                 | 1.436103954               |
| 143                   | 21.21320344                      | 0.708711424                 | 20.1246118                            | 0.891572117               | 0.04466153                  | 1.12516168                |
| 1792                  | 62.92853089                      | 0.366646954                 | 57.31491952                           | 0.71573023                | 0.032123504                 | 1.23127302                |
| 2599                  | 83.30066026                      | 0.191315163                 | 74.09453421                           | 0.576213104               | 0.023204573                 | 1.062191719               |
| 567                   | 41.78516483                      | 0.506228599                 | 38.41874542                           | 0.796982696               | 0.037746111                 | 1.547007106               |
| 7057                  | 96.09370427                      | 0.405221287                 | 81.60882305                           | 0.739988348               | 0.033771084                 | 1.135954645               |
| 10834                 | 119.1721444                      | 0.273788202                 | 109.2016483                           | 0.649339133               | 0.027759155                 | 1.151724195               |
| 14519                 | 116.1507641                      | 0.407222456                 | 109.4897255                           | 0.741214499               | 0.03385437                  | 1.0228164                 |
| 446                   | 52.47856705                      | 0.301381527                 | 41.78516483                           | 0.670458976               | 0.029124414                 | 1.502843692               |
| 456                   | 45.79301257                      | 0.336103891                 | 40.36087214                           | 0.695276974               | 0.03075641                  | 1.481933359               |
| 224                   | 28.46049894                      | 0.517625905                 | 24.18677324                           | 0.802919492               | 0.038168657                 | 1.227144431               |
| 913                   | 56.1248608                       | 0.263743012                 | 48.83646179                           | 0.641298643               | 0.02724516                  | 1.064431399               |
| 2704                  | 82.97590012                      | 0.311268892                 | 72.99315036                           | 0.677712166               | 0.029598302                 | 1.024986278               |
| 149                   | 36.24913792                      | 0.338765715                 | 36.12478374                           | 0.697107599               | 0.03087796                  | 1.599849715               |
| 865                   | 63                               | 0.231448553                 | 56.04462508                           | 0.613976134               | 0.02552267                  | 1.499341448               |
| 4929                  | 88.74119675                      | 0.338786767                 | 67.08203932                           | 0.697122039               | 0.03087892                  | 1.305460787               |
| 31                    | 13.07669683                      | 0.778493133                 | 12.72792206                           | 0.91992325                | 0.046808667                 | 1.254444344               |
| 4962                  | 80.61017306                      | 0.347221061                 | 72.62231062                           | 0.702859771               | 0.031260931                 | 1.113055665               |
| 3507                  | 91.9782583                       | 0.11772184                  | 84.48076704                           | 0.490101104               | 0.018202347                 | 1.532236141               |
| 365                   | 35.24202037                      | 0.483554661                 | 28.46049894                           | 0.784901558               | 0.036891105                 | 1.156199342               |
| 589                   | 78.51751397                      | 0.212639888                 | 56.92099788                           | 0.596872512               | 0.024463649                 | 2.602139313               |
| 50                    | 21                               | 0.659164411                 | 19.20937271                           | 0.870291183               | 0.043072071                 | 1.886083631               |
| 13                    | 10.81665383                      | 0.67300516                  | 10.81665383                           | 0.876340329               | 0.043521923                 | 0                         |
| 3429                  | 119.4361754                      | 0.257604169                 | 86.37708029                           | 0.636283941               | 0.026926216                 | 1.531259238               |
| 304                   | 39.57271787                      | 0.440325147                 | 21.84032967                           | 0.760777797               | 0.035203482                 | 1.779969341               |
| 416                   | 40.36087214                      | 0.328486325                 | 35.11409973                           | 0.689984124               | 0.030405876                 | 1.209862722               |
| 3652                  | 86.63717447                      | 0.35471917                  | 70.29224708                           | 0.707883115               | 0.031596662                 | 1.30638907                |
| 7222                  | 85.53946458                      | 0.468064941                 | 78.23042886                           | 0.776429517               | 0.036295429                 | 1.033693612               |
| 63                    | 18                               | 0.697229087                 | 12.72792206                           | 0.886730879               | 0.044298256                 | 1.311296104               |
| 680                   | 43.05810028                      | 0.508331064                 | 37.94733192                           | 0.798084513               | 0.037824413                 | 1.464717173               |
| 24                    | 13.07669683                      | 0.801280772                 | 6.708203932                           | 0.928812904               | 0.047488805                 | 1.668265066               |
| 163                   | 62.13694553                      | 0.27763441                  | 21.63330765                           | 0.652365667               | 0.027953457                 | 4.481763927               |
| 280                   | 51.35172831                      | 0.227274645                 | 40.02499219                           | 0.610262939               | 0.025291487                 | 1.586433773               |

| original_shape_SurfaceVolumeRatio | original_shape_Volume | original_shape_SphericalDisproportion | original_shape_Flatness | original_shape_SurfaceArea | original_shape_Maximum2DDiameterColumn |
|-----------------------------------|-----------------------|---------------------------------------|-------------------------|----------------------------|----------------------------------------|
| 0.283131616                       | 9747                  | 1.250627281                           | 1.316029163             | 2759.683857                | 33.54101966                            |
| 0.200544349                       | 37881                 | 1.392729526                           | 1.229381183             | 7596.820486                | 50.28916384                            |
| 0.369934135                       | 4779                  | 1.288504559                           | 1.098151844             | 1767.915232                | 19.20937271                            |
| 0.186919676                       | 52191                 | 1.444450851                           | 1.363354377             | 9755.524836                | 57.31491952                            |
| 0.402391282                       | 2727                  | 1.162499615                           | 1.298150139             | 1097.321026                | 20.1246118                             |
| 0.312904369                       | 6588                  | 1.212956892                           | 1.146339074             | 2061.413984                | 24.73863375                            |
| 0.564634532                       | 1890                  | 1.443567996                           | 1.403433097             | 1067.159265                | 18.24828759                            |
| 0.308038474                       | 10827                 | 1.409148896                           | 1.158420142             | 3335.132561                | 39                                     |
| 0.187837231                       | 39852                 | 1.326725042                           | 1.10373971              | 7485.689323                | 53.16013544                            |
| 0.185756543                       | 62613                 | 1.525275054                           | 1.061811633             | 11630.77445                | 79.20227269                            |
| 0.281504766                       | 10152                 | 1.260430289                           | 1.138930317             | 2857.836387                | 27.65863337                            |
| 0.256889994                       | 20439                 | 1.452388981                           | 1.446565394             | 5250.574588                | 44.59820624                            |
| 0.190161163                       | 36882                 | 1.3089082                             | 1.124555346             | 7013.52402                 | 49.47726751                            |
| 0.260819368                       | 14256                 | 1.307740605                           | 1.035516137             | 3718.240905                | 35.11409973                            |
| 0.346827184                       | 9828                  | 1.536210471                           | 1.167762503             | 3408.617564                | 38.18376618                            |
| 0.115655403                       | 292356                | 1.587276089                           | 1.257609593             | 33812.55114                | 111.3642672                            |
| 0.405976355                       | 5859                  | 1.513414118                           | 1.601230402             | 2378.615462                | 36.12478374                            |
| 0.19701679                        | 41904                 | 1.41504725                            | 1.131016353             | 8255.791574                | 49.65883607                            |
| 0.382762391                       | 4914                  | 1.345623361                           | 1.078266485             | 1880.894389                | 26.83281573                            |
| 0.156573374                       | 74898                 | 1.364762855                           | 1.260547697             | 11727.03259                | 67.41661516                            |
| 0.151014878                       | 137025                | 1.609912289                           | 1.075387148             | 20692.81367                | 97.71898485                            |
| 0.259459282                       | 24543                 | 1.559172989                           | 1.515238608             | 6367.909148                | 54.74486277                            |
| 0.182452257                       | 78840                 | 1.617759606                           | 1.500785383             | 14384.53594                | 76.4852927                             |
| 0.495514012                       | 3591                  | 1.56907469                            | 1.68179276              | 1779.390818                | 23.43074903                            |
| 0.294533904                       | 25920                 | 1.802448377                           | 1.624196742             | 7634.318793                | 56.92099788                            |
| 0.33276979                        | 8154                  | 1.385000737                           | 1.410503295             | 2713.404871                | 21.21320344                            |
| 0.187192078                       | 61803                 | 1.530405533                           | 1.478945814             | 11569.03201                | 59.16924877                            |
| 0.187651459                       | 105165                | 1.831575795                           | 1.458280132             | 19734.36565                | 94.15412896                            |
| 0.17149234                        | 100332                | 1.647809838                           | 1.162127515             | 17206.16945                | 76.4852927                             |
| 0.190688327                       | 45711                 | 1.409873748                           | 1.083761913             | 8716.5541                  | 54.08326913                            |
| 0.146906836                       | 113427                | 1.470494363                           | 1.171540528             | 16663.20174                | 75.89466384                            |
| 0.122182653                       | 238491                | 1.566809125                           | 1.207296429             | 29139.46316                | 99.72462083                            |
| 0.190269986                       | 37503                 | 1.316966818                           | 1.158514851             | 7135.695304                | 55.31726674                            |
| 0.662913288                       | 405                   | 1.01420156                            | 1.426439553             | 268.4798816                | 8.485281374                            |
| 0.439757931                       | 3051                  | 1.318895214                           | 1.231111351             | 1341.701448                | 25.8069758                             |
| 0.188366715                       | 36018                 | 1.286352234                           | 1.238726347             | 6784.592359                | 44.29446918                            |
| 0.127537151                       | 180657                | 1.490862247                           | 1.249734896             | 23040.47905                | 85.38149682                            |
| 0.147114787                       | 81864                 | 1.320899748                           | 1.21616575              | 12043.40494                | 61.84658438                            |
| 0.334458765                       | 8667                  | 1.420631332                           | 1.110886988             | 2898.754113                | 25.8069758                             |
| 0.254620723                       | 14499                 | 1.283873712                           | 1.067355029             | 3691.74587                 | 34.98571137                            |
| 0.292020259                       | 19305                 | 1.619889755                           | 1.342027434             | 5637.451094                | 41.78516483                            |
| 0.30576673                        | 10287                 | 1.375104438                           | 1.343975065             | 3145.422348                | 35.11409973                            |
| 0.246970732                       | 22248                 | 1.436343641                           | 1.627269121             | 5494.604841                | 66                                     |
| 0.292911758                       | 11853                 | 1.381005609                           | 1.145115166             | 3471.883068                | 32.44996148                            |
| 0.210212228                       | 30105                 | 1.352238806                           | 1.300208205             | 6328.439132                | 56.60388679                            |
| 0.143257071                       | 165294                | 1.625739559                           | 1.376146403             | 23679.53433                | 97.5807358                             |
| 0.212362211                       | 74142                 | 1.844794009                           | 1.107862739             | 15744.95905                | 77.88452991                            |
| 0.31065891                        | 6156                  | 1.177332754                           | 1.254232204             | 1912.416249                | 24.18677324                            |
| 0.589426754                       | 594                   | 1.024568977                           | 1.18371579              | 350.1194919                | 10.81665383                            |
| 0.407560634                       | 3942                  | 1.331313425                           | 1.06519591              | 1606.60402                 | 21.84032967                            |
| 0.141290427                       | 110160                | 1.400564959                           | 1.232998383             | 15564.55348                | 82.54089895                            |
| 0.249610137                       | 10881                 | 1.143758578                           | 1.082690946             | 2716.0079                  | 29.69848481                            |
| 0.161098885                       | 86265                 | 1.471928174                           | 1.311167299             | 13897.19529                | 82.37718131                            |
| 0.323987259                       | 6453                  | 1.247281157                           | 1.017096309             | 2090.689779                | 24.18677324                            |
| 0.113153788                       | 305262                | 1.575466673                           | 1.092557373             | 34541.55159                | 92.4175308                             |
| 0.31560039                        | 9045                  | 1.359741224                           | 1.155252013             | 2854.605532                | 28.3019434                             |
| 0.364500978                       | 23544                 | 2.16026978                            | 1.775444201             | 8581.811037                | 52.39274759                            |
| 0.381570079                       | 12366                 | 1.824595507                           | 1.416118485             | 4718.495591                | 42.63801121                            |
| 0.324556268                       | 9558                  | 1.424278392                           | 1.245157578             | 3102.108812                | 32.44996148                            |
| 0.251554573                       | 12582                 | 1.209849415                           | 1.451071414             | 3165.059635                | 39.11521443                            |
| 0.183852567                       | 39285                 | 1.29239269                            | 1.151871378             | 7222.648099                | 45.79301257                            |
| 0.125157115                       | 182952                | 1.469209762                           | 1.186365688             | 22897.74445                | 90.44888059                            |
| 0.156018215                       | 109998                | 1.545798131                           | 1.725769248             | 17161.69167                | 110.0227249                            |
| 0.2188512                         | 48114                 | 1.645970175                           | 1.299193934             | 10529.80661                | 57.07889277                            |
| 0.463099111                       | 1431                  | 1.079119898                           | 1.071326911             | 662.6948279                | 15.29705854                            |
| 0.247666788                       | 31104                 | 1.610605067                           | 1.537687161             | 7703.427761                | 60.74537019                            |
| 0.4510335                         | 2835                  | 1.320005365                           | 1.412889137             | 1278.679972                | 21.84032967                            |
| 0.135022195                       | 93609                 | 1.26773041                            | 1.014023763             | 12639.29266                | 64.76109943                            |
| 0.34574909                        | 3861                  | 1.12161426                            | 1.133452112             | 1334.937238                | 20.1246118                             |
| 0.185424667                       | 48384                 | 1.397174464                           | 1.262883982             | 8971.587081                | 49.47726751                            |
| 0.203474964                       | 70173                 | 1.735469036                           | 1.749525179             | 14278.44862                | 75.53806987                            |
| 0.244372852                       | 15309                 | 1.254732386                           | 1.186352804             | 3741.103995                | 32.44996148                            |
| 0.113568724                       | 190539                | 1.351354368                           | 1.369035411             | 21639.27113                | 85.95929269                            |
| 0.112191946                       | 292518                | 1.540027314                           | 1.114162343             | 32818.16379                | 105.3422992                            |
| 0.089146999                       | 392013                | 1.349137127                           | 1.404406789             | 34946.78257                | 105.5130324                            |
| 0.314687173                       | 12042                 | 1.491515567                           | 1.452567907             | 3789.462935                | 36.12478374                            |
| 0.301219726                       | 12312                 | 1.438275733                           | 1.342977258             | 3708.617262                | 31.32091953                            |
| 0.330578696                       | 6048                  | 1.245454881                           | 1.033662881             | 1999.339956                | 28.3019434                             |
| 0.259106887                       | 24651                 | 1.559335906                           | 1.631204484             | 6387.243872                | 54.74486277                            |
| 0.170732169                       | 73008                 | 1.475552676                           | 1.214145008             | 12464.81422                | 60.74537019                            |
| 0.43618189                        | 4023                  | 1.434498779                           | 2.087924898             | 1754.759743                | 27.65863337                            |
| 0.27555355                        | 23355                 | 1.628727804                           | 1.229886121             | 6435.553165                | 41.78516483                            |
| 0.135873402                       | 133083                | 1.434469066                           | 1.224266194             | 18082.44002                | 78                                     |
| 0.557815669                       | 837                   | 1.087047207                           | 1.474171378             | 466.8917154                | 10.81665383                            |
| 0.134464796                       | 133974                | 1.422758908                           | 1.076891112             | 18014.78654                | 74.09453421                            |
| 0.216487055                       | 94689                 | 2.040395321                           | 1.144392644             | 20498.94279                | 90.24965374                            |
| 0.28737571                        | 9855                  | 1.27404512                            | 1.049146131             | 2832.087621                | 27.65863337                            |
| 0.322188123                       | 15903                 | 1.675399654                           | 1.519940542             | 5123.757716                | 35.11409973                            |
| 0.502776478                       | 1350                  | 1.149040711                           | 1.268704721             | 678.7482451                | 13.41640786                            |
| 0.782304126                       | 351                   | 1.141109187                           | 0                       | 274.5887483                | 9                                      |
| 0.168005208                       | 92583                 | 1.571625394                           | 1.269822403             | 15554.4262                 | 77.4209274                             |
| 0.315123298                       | 8208                  | 1.314444249                           | 1.182222685             | 2586.532026                | 33.54101966                            |
| 0.312962759                       | 11232                 | 1.449308709                           | 1.266199117             | 3515.197706                | 29.69848481                            |
| 0.147873741                       | 98604                 | 1.412662598                           | 1.335336472             | 14580.94237                | 74.09453421                            |
| 0.107409247                       | 194994                | 1.287946913                           | 1.263857147             | 20944.15866                | 78.51751397                            |
| 0.45686812                        | 1701                  | 1.127737878                           | 1.373021188             | 777.1326723                | 16.97056275                            |
| 0.229691196                       | 18360                 | 1.253000132                           | 1.070318896             | 4217.130356                | 40.36087214                            |
| 0.601678116                       | 648                   | 1.076643096                           | 1.224053779             | 389.8874189                | 10.81665383                            |
| 0.452351364                       | 4401                  | 1.53288263                            | 1.445693868             | 1990.798355                | 60.74537019                            |
| 0.40376301                        | 7560                  | 1.638637931                           | 1.599261939             | 3052.448358                | 43.68065934                            |

| original_shape_Maximum2DDiameterRow | log.sigma.5.0.mm.3D_gldm_GrayLevelVariance | log.sigma.5.0.mm.3D_gldm_HighGrayLevelEmphasis | log.sigma.5.0.mm.3D_gldm_GrayLevelNonUniformityNormalized |
|-------------------------------------|--------------------------------------------|------------------------------------------------|-----------------------------------------------------------|
| 33.13608305                         | 23.37047751                                | 138.2936288                                    | 0.057465796                                               |
| 51.26402247                         | 10.71989307                                | 112.6535994                                    | 0.087062699                                               |
| 27.65863337                         | 10.81668741                                | 76.27118644                                    | 0.089725175                                               |
| 66.61080993                         | 18.9293639                                 | 193.4754268                                    | 0.065784484                                               |
| 17.49285568                         | 41.81374375                                | 198.6831683                                    | 0.049897069                                               |
| 25.63201124                         | 12.83181604                                | 76.6352459                                     | 0.078204784                                               |
| 12.36931688                         | 7.179591837                                | 30.77142857                                    | 0.132244898                                               |
| 33.9411255                          | 29.01825237                                | 131.9825436                                    | 0.055652639                                               |
| 46.57252409                         | 78.81724347                                | 454.4573171                                    | 0.035827072                                               |
| 58.24946352                         | 9.825802969                                | 117.9624838                                    | 0.090051417                                               |
| 32.44996148                         | 15.83575713                                | 74.2606383                                     | 0.073845632                                               |
| 50.28916384                         | 14.92362084                                | 103.7859974                                    | 0.072075861                                               |
| 46.95742753                         | 14.03913919                                | 56.35578331                                    | 0.091573435                                               |
| 40.02499219                         | 20.86819545                                | 129.967803                                     | 0.061380854                                               |
| 29.69848481                         | 18.69704746                                | 134.0824176                                    | 0.066100109                                               |
| 110.0227249                         | 5.117323958                                | 221.3115996                                    | 0.209316114                                               |
| 22.84731932                         | 21.97825394                                | 133.6359447                                    | 0.062243836                                               |
| 57.31491952                         | 12.85525826                                | 84.40592784                                    | 0.083623392                                               |
| 31.89043744                         | 38.05808477                                | 218.3846154                                    | 0.048605241                                               |
| 76.4852927                          | 9.23246567                                 | 84.91744773                                    | 0.092801423                                               |
| 96.04686356                         | 5.982374103                                | 108.7440394                                    | 0.123298619                                               |
| 54.74486277                         | 18.17037545                                | 103.1386139                                    | 0.072322854                                               |
| 88.23264702                         | 7.503809228                                | 175.3393836                                    | 0.11193845                                                |
| 25.8069758                          | 30.47521058                                | 162.2932331                                    | 0.053536096                                               |
| 58.94064811                         | 7.147638889                                | 78.26875                                       | 0.110568576                                               |
| 37.58989226                         | 12.94403754                                | 102.5033113                                    | 0.081487654                                               |
| 63.28506933                         | 6.086473172                                | 105.9816514                                    | 0.125249426                                               |
| 87.20665112                         | 8.88074115                                 | 138.7178434                                    | 0.136358947                                               |
| 77.88452991                         | 12.79433132                                | 197.6840689                                    | 0.104025765                                               |
| 55.15432893                         | 13.52942818                                | 136.7879504                                    | 0.077579792                                               |
| 90.69729875                         | 7.550776526                                | 113.0321352                                    | 0.115435217                                               |
| 94.86832981                         | 7.136905875                                | 159.4314502                                    | 0.145335971                                               |
| 44.59820624                         | 17.73698622                                | 120.3455724                                    | 0.066335773                                               |
| 8.485281374                         | 14.37333333                                | 57.93333333                                    | 0.12                                                      |
| 24.18677324                         | 18.14926776                                | 130.7345133                                    | 0.069778369                                               |
| 51.6139516                          | 13.30025017                                | 112.2833583                                    | 0.081270834                                               |
| 94.15412896                         | 8.166491856                                | 135.0292931                                    | 0.143980293                                               |
| 66.2721661                          | 12.25356259                                | 103.5531003                                    | 0.081944744                                               |
| 34.20526275                         | 29.60289593                                | 213.834891                                     | 0.054357004                                               |
| 30.14962686                         | 17.78716852                                | 100.4040968                                    | 0.067333867                                               |
| 45.79301257                         | 12.88557093                                | 165.4685315                                    | 0.081711575                                               |
| 32.44996148                         | 25.99319376                                | 108.7506562                                    | 0.064569685                                               |
| 40.80441153                         | 13.32913093                                | 86.57281553                                    | 0.078565369                                               |
| 45                                  | 28.2813601                                 | 112.2186788                                    | 0.056304191                                               |
| 46.95742753                         | 18.09469404                                | 121.3130045                                    | 0.071563072                                               |
| 91.78235124                         | 4.472402567                                | 84.23930088                                    | 0.195101914                                               |
| 73.54590403                         | 19.56903851                                | 162.5047342                                    | 0.067504929                                               |
| 25.45584412                         | 18.24576793                                | 92.44736842                                    | 0.067751616                                               |
| 10.81665383                         | 8.57231405                                 | 42.95454545                                    | 0.123966942                                               |
| 26.83281573                         | 44.01731094                                | 304.1986301                                    | 0.047288422                                               |
| 69.97142274                         | 8.734139213                                | 139.6066176                                    | 0.11310866                                                |
| 30                                  | 11.78346028                                | 69.09925558                                    | 0.091097168                                               |
| 81.05553652                         | 11.95528067                                | 134.6065728                                    | 0.082331009                                               |
| 26.83281573                         | 14.51644754                                | 109.4769874                                    | 0.078237426                                               |
| 148.2194319                         | 6.276556832                                | 127.3797099                                    | 0.179130656                                               |
| 32.31098884                         | 23.68666518                                | 166.4                                          | 0.058445088                                               |
| 57.31491952                         | 15.67994987                                | 129.0584862                                    | 0.072016244                                               |
| 41.67733197                         | 37.96177132                                | 344.058952                                     | 0.047872848                                               |
| 31.89043744                         | 16.8894395                                 | 104.3700565                                    | 0.071164097                                               |
| 28.46049894                         | 13.8474691                                 | 80.65879828                                    | 0.075254656                                               |
| 51.26402247                         | 10.25060639                                | 69.76838488                                    | 0.095270958                                               |
| 93.1933474                          | 15.4043368                                 | 252.1037485                                    | 0.086480045                                               |
| 90.7964757                          | 6.633365941                                | 74.55621011                                    | 0.119087746                                               |
| 70.03570518                         | 6.055899121                                | 65.56734007                                    | 0.113048429                                               |
| 12.36931688                         | 10.55322179                                | 72.75471698                                    | 0.094339623                                               |
| 43.26661531                         | 13.7443388                                 | 130.4105903                                    | 0.078762478                                               |
| 19.20937271                         | 25.55229025                                | 152.7047619                                    | 0.060498866                                               |
| 59.54829972                         | 16.54571742                                | 124.8269397                                    | 0.073734479                                               |
| 20.1246118                          | 20.22142892                                | 129.958042                                     | 0.068609712                                               |
| 56.60388679                         | 10.23346788                                | 115.124442                                     | 0.086147386                                               |
| 79.88116173                         | 10.86883803                                | 112.3362832                                    | 0.084613151                                               |
| 36.24913792                         | 16.30068836                                | 103.0828924                                    | 0.075445816                                               |
| 87.36131867                         | 8.3148764                                  | 128.4124982                                    | 0.120992086                                               |
| 104.3551628                         | 6.909505289                                | 76.84040982                                    | 0.136541172                                               |
| 111.3642672                         | 7.139613316                                | 161.4747572                                    | 0.177010209                                               |
| 39.11521443                         | 23.34316495                                | 147.970852                                     | 0.057310624                                               |
| 39.11521443                         | 12.6875                                    | 80.75                                          | 0.079312865                                               |
| 25.8069758                          | 18.55325255                                | 86.32142857                                    | 0.069116709                                               |
| 48.09365863                         | 9.328295558                                | 53.8652793                                     | 0.095676543                                               |
| 75.95393341                         | 9.32569763                                 | 213.5281065                                    | 0.097532474                                               |
| 24.73863375                         | 21.40480159                                | 162.2013423                                    | 0.065177244                                               |
| 60.07495318                         | 16.73036319                                | 149.5260116                                    | 0.071816633                                               |
| 77.88452991                         | 10.67763548                                | 187.6715358                                    | 0.102313184                                               |
| 12.36931688                         | 5.723204995                                | 39.06451613                                    | 0.146722164                                               |
| 77.82673063                         | 6.636984086                                | 105.0552197                                    | 0.120403661                                               |
| 65.7951366                          | 7.199574861                                | 83.60621614                                    | 0.105981934                                               |
| 31.89043744                         | 17.6384012                                 | 83.09315068                                    | 0.07299681                                                |
| 59.77457654                         | 28.28269837                                | 275.1833616                                    | 0.054407199                                               |
| 13.41640786                         | 6.4496                                     | 48.44                                          | 0.1336                                                    |
| 9                                   | 6.284023669                                | 29.76923077                                    | 0.136094675                                               |
| 82.37718131                         | 14.77585747                                | 236.3680373                                    | 0.08593838                                                |
| 39.11521443                         | 19.67190746                                | 69.36513158                                    | 0.076480263                                               |
| 35.11409973                         | 8.574311206                                | 47.45673077                                    | 0.095055936                                               |
| 77.4209274                          | 10.45000174                                | 106.2239869                                    | 0.08535961                                                |
| 81.9390017                          | 8.681326217                                | 111.6467737                                    | 0.119894778                                               |
| 16.97056275                         | 27.46686823                                | 231.0952381                                    | 0.062736206                                               |
| 36.61966685                         | 23.02091479                                | 169.0397059                                    | 0.060694533                                               |
| 12.72792206                         | 4.331597222                                | 16.875                                         | 0.15625                                                   |
| 22.84731932                         | 25.38311566                                | 152.809816                                     | 0.062290639                                               |
| 30.59411708                         | 17.48927296                                | 117.4178571                                    | 0.070994898                                               |

| log.sigma.5.0.mm.3D_gldm_DependenceEntropy | log.sigma.5.0.mm.3D_gldm_DependenceNonUniformity | log.sigma.5.0.mm.3D_gldm_GrayLevelNonUniformity | log.sigma.5.0.mm.3D_gldm_SmallDependenceEmphasis |
|--------------------------------------------|--------------------------------------------------|-------------------------------------------------|--------------------------------------------------|
| 6.367917341                                | 63.40443213                                      | 20.74515235                                     | 0.252166769                                      |
| 6.948805526                                | 137.044191                                       | 122.1489665                                     | 0.109839324                                      |
| 5.566069537                                | 34.14124294                                      | 15.88135593                                     | 0.285568407                                      |
| 7.029018449                                | 248.8592861                                      | 127.1614071                                     | 0.203061822                                      |
| 5.307680513                                | 28.72277228                                      | 5.03960396                                      | 0.469130913                                      |
| 5.616096595                                | 48.57377049                                      | 19.08196721                                     | 0.265805463                                      |
| 4.629372753                                | 12.51428571                                      | 9.257142857                                     | 0.32226563                                       |
| 6.228846106                                | 87.26932668                                      | 22.31670823                                     | 0.376705812                                      |
| 7.22358606                                 | 287.9945799                                      | 52.88075881                                     | 0.309554659                                      |
| 7.074340004                                | 209.2828806                                      | 208.8292367                                     | 0.120423661                                      |
| 6.001848056                                | 67.86702128                                      | 27.76595745                                     | 0.274897197                                      |
| 6.643410317                                | 102.7463672                                      | 54.56142668                                     | 0.195987184                                      |
| 6.623679995                                | 147.5051245                                      | 125.0893119                                     | 0.168759432                                      |
| 6.30848202                                 | 96.59090909                                      | 32.40909091                                     | 0.276592496                                      |
| 6.088750853                                | 71.95054945                                      | 24.06043956                                     | 0.311833566                                      |
| 7.008545997                                | 439.2007758                                      | 2266.47488                                      | 0.043079847                                      |
| 5.65334045                                 | 54.79723502                                      | 13.50691244                                     | 0.372433116                                      |
| 6.823246686                                | 170.306701                                       | 129.7835052                                     | 0.191166872                                      |
| 5.915696429                                | 48.43956044                                      | 8.846153846                                     | 0.415114469                                      |
| 7.073797774                                | 224.850036                                       | 257.4311464                                     | 0.079261172                                      |
| 6.962937912                                | 314.7462069                                      | 625.7404926                                     | 0.07056966                                       |
| 6.735415912                                | 119.5786579                                      | 65.74147415                                     | 0.209005985                                      |
| 7.05492241                                 | 201.9130137                                      | 326.860274                                      | 0.088350852                                      |
| 5.635972992                                | 33.85714286                                      | 7.120300752                                     | 0.41523183                                       |
| 6.805466922                                | 84.95416667                                      | 106.1458333                                     | 0.125184498                                      |
| 5.826176104                                | 54.90728477                                      | 24.60927152                                     | 0.305452403                                      |
| 7.031215065                                | 158.2616863                                      | 286.6959371                                     | 0.092452021                                      |
| 7.024144087                                | 213.0513479                                      | 531.1181001                                     | 0.072099415                                      |
| 7.155427978                                | 260.3821313                                      | 386.5597417                                     | 0.113870484                                      |
| 7.013182301                                | 158.9291199                                      | 131.3425871                                     | 0.11309343                                       |
| 7.090968579                                | 267.8107593                                      | 484.9433468                                     | 0.072455987                                      |
| 7.183353732                                | 418.4199026                                      | 1283.752632                                     | 0.077698212                                      |
| 6.858468681                                | 183.1209503                                      | 92.14038877                                     | 0.199414745                                      |
| 3.189898095                                | 5.4                                              | 1.8                                             | 0.522222222                                      |
| 5.260197272                                | 30.7699115                                       | 7.884955752                                     | 0.382544248                                      |
| 5.658015452                                | 178.2668666                                      | 108.4152924                                     | 0.210174507                                      |
| 7.060984063                                | 320.0617247                                      | 963.3721417                                     | 0.068962781                                      |
| 7.201234586                                | 251.3542216                                      | 248.4564644                                     | 0.10390512                                       |
| 6.195577991                                | 70.42056075                                      | 17.44859813                                     | 0.303546832                                      |
| 6.443726862                                | 79.27932961                                      | 36.15828678                                     | 0.227695813                                      |
| 6.645907508                                | 86.35384615                                      | 58.42377622                                     | 0.179728982                                      |
| 6.130746387                                | 71.37795276                                      | 24.60104987                                     | 0.345359758                                      |
| 6.243219642                                | 124.0315534                                      | 64.73786408                                     | 0.2657233                                        |
| 6.249051062                                | 85.72892938                                      | 24.71753986                                     | 0.341179504                                      |
| 6.714932336                                | 150.2753363                                      | 79.79282511                                     | 0.201153322                                      |
| 6.820852979                                | 257.0486769                                      | 1194.413917                                     | 0.03494332                                       |
| 6.934241097                                | 387.7589221                                      | 185.3685361                                     | 0.196797644                                      |
| 5.797303724                                | 41.5877193                                       | 15.44736842                                     | 0.321227755                                      |
| 3.55034071                                 | 11.18181818                                      | 2.727272727                                     | 0.482323232                                      |
| 5.814432395                                | 46.28767123                                      | 6.904109589                                     | 0.494090563                                      |
| 7.13471418                                 | 255.345098                                       | 461.4833333                                     | 0.085567728                                      |
| 6.021383471                                | 55.44168734                                      | 36.71215881                                     | 0.262064044                                      |
| 7.040265537                                | 327.8826291                                      | 263.0475743                                     | 0.137270016                                      |
| 5.84157101                                 | 46.64016736                                      | 18.69874477                                     | 0.257219755                                      |
| 7.052472613                                | 480.743499                                       | 2025.251194                                     | 0.057721282                                      |
| 6.000456897                                | 76.68358209                                      | 19.57910448                                     | 0.375664425                                      |
| 6.239411237                                | 167.766055                                       | 62.79816514                                     | 0.341801502                                      |
| 6.298810927                                | 124.0524017                                      | 21.92576419                                     | 0.423403972                                      |
| 6.228074289                                | 57.81920904                                      | 25.1920904                                      | 0.256979185                                      |
| 6.467383501                                | 61.60085837                                      | 35.06866953                                     | 0.187810161                                      |
| 6.446303521                                | 172.2659794                                      | 138.619244                                      | 0.174423206                                      |
| 7.442642093                                | 468.6068477                                      | 585.9887839                                     | 0.127114984                                      |
| 7.193845468                                | 252.0765832                                      | 485.1634757                                     | 0.079286166                                      |
| 6.808231269                                | 144.4635241                                      | 201.4523008                                     | 0.097338162                                      |
| 4.56236503                                 | 14.81132075                                      | 5                                               | 0.453322851                                      |
| 6.64102401                                 | 162.3559028                                      | 90.734375                                       | 0.205117889                                      |
| 5.205885552                                | 33.4952381                                       | 6.352380952                                     | 0.475579365                                      |
| 7.212451391                                | 310.1987309                                      | 255.6374387                                     | 0.130923211                                      |
| 5.421748744                                | 37.41958042                                      | 9.811188811                                     | 0.43958042                                       |
| 6.976602071                                | 172.8325893                                      | 154.3761161                                     | 0.138399892                                      |
| 7.002165253                                | 266.0496345                                      | 219.9095806                                     | 0.143443177                                      |
| 6.479596005                                | 80.38977072                                      | 42.77777778                                     | 0.245185583                                      |
| 7.040110393                                | 391.362477                                       | 853.8411506                                     | 0.066455171                                      |
| 7.131955443                                | 509.0180912                                      | 1479.287059                                     | 0.050985048                                      |
| 7.125849972                                | 615.6550038                                      | 2570.011227                                     | 0.063348386                                      |
| 6.118664841                                | 98.78923767                                      | 25.56053812                                     | 0.334163263                                      |
| 5.979458817                                | 75.43859649                                      | 36.16666667                                     | 0.296037684                                      |
| 5.669491137                                | 46.33928571                                      | 15.48214286                                     | 0.307461677                                      |
| 6.442215434                                | 109.6155531                                      | 87.35268346                                     | 0.196422826                                      |
| 6.979391097                                | 208.5902367                                      | 263.7278107                                     | 0.114333644                                      |
| 5.325141068                                | 41.57718121                                      | 9.711409396                                     | 0.415594705                                      |
| 6.689094871                                | 121.8439306                                      | 62.12138728                                     | 0.256103059                                      |
| 7.335947873                                | 338.1393792                                      | 504.3016839                                     | 0.109666913                                      |
| 4.115486633                                | 7.258064516                                      | 4.548387097                                     | 0.343808244                                      |
| 7.133538619                                | 307.6360339                                      | 597.4429665                                     | 0.084168112                                      |
| 6.846445504                                | 318.1816367                                      | 371.6786427                                     | 0.133105183                                      |
| 6.11633033                                 | 58.33150685                                      | 26.64383562                                     | 0.279132656                                      |
| 6.315706413                                | 136.9286927                                      | 32.04584041                                     | 0.392859532                                      |
| 4.67326969                                 | 8.68                                             | 6.68                                            | 0.322071882                                      |
| 3.238901257                                | 7.461538462                                      | 1.769230769                                     | 0.769230769                                      |
| 7.304683051                                | 278.3368329                                      | 294.6827063                                     | 0.134654394                                      |
| 5.969171928                                | 51.71710526                                      | 23.25                                           | 0.258913726                                      |
| 6.131709947                                | 56.88942308                                      | 39.54326923                                     | 0.165374657                                      |
| 7.229189992                                | 294.8066813                                      | 311.7332968                                     | 0.094670455                                      |
| 7.181728247                                | 388.8482415                                      | 865.8800886                                     | 0.066032193                                      |
| 5.040461669                                | 21.76190476                                      | 3.952380952                                     | 0.504078483                                      |
| 6.429503679                                | 118.0147059                                      | 41.45588235                                     | 0.268125292                                      |
| 3.772055209                                | 7                                                | 3.75                                            | 0.309027778                                      |
| 5.641561824                                | 41.14723926                                      | 10.15337423                                     | 0.361001941                                      |
| 6.305929561                                | 42.55714286                                      | 19.87857143                                     | 0.269457303                                      |

| log.sigma.5.0.mm.3D_gldm_DependenceNonUniformityNormalized | log.sigma.5.0.mm.3D_gldm_DependenceVariance | log.sigma.5.0.mm.3D_gldm_LargeDependenceEmphasis |
|------------------------------------------------------------|---------------------------------------------|--------------------------------------------------|
| 0.175635546                                                | 3.621196891                                 | 14.57894737                                      |
| 0.097679395                                                | 12.01185932                                 | 45.30220955                                      |
| 0.192888378                                                | 2.440167257                                 | 11.30508475                                      |
| 0.128742517                                                | 7.888907474                                 | 25.90636317                                      |
| 0.284383884                                                | 1.472992844                                 | 6.089108911                                      |
| 0.19907283                                                 | 3.008263908                                 | 12.55737705                                      |
| 0.17877551                                                 | 3.08244898                                  | 12.42857143                                      |
| 0.217629244                                                | 2.355072419                                 | 9.224438903                                      |
| 0.195118279                                                | 2.943919331                                 | 11.54200542                                      |
| 0.090247038                                                | 11.90943257                                 | 46.44976283                                      |
| 0.180497397                                                | 9.82806134                                  | 23.02659574                                      |
| 0.135728358                                                | 5.443272739                                 | 21.9009247                                       |
| 0.107983254                                                | 8.826891952                                 | 32.35578331                                      |
| 0.182937328                                                | 3.731003214                                 | 13.80681818                                      |
| 0.197666345                                                | 2.335678058                                 | 10.59340659                                      |
| 0.040561579                                                | 60.20444871                                 | 255.6514592                                      |
| 0.25252182                                                 | 1.795578585                                 | 7.783410138                                      |
| 0.109733699                                                | 9.211028005                                 | 31.4806701                                       |
| 0.266151431                                                | 1.216278227                                 | 6.241758242                                      |
| 0.081056249                                                | 18.64599804                                 | 67.65609229                                      |
| 0.062018957                                                | 36.84605806                                 | 117.9737931                                      |
| 0.131549679                                                | 6.407781372                                 | 23.18261826                                      |
| 0.069148292                                                | 22.85952149                                 | 80.74452055                                      |
| 0.254564984                                                | 1.356097009                                 | 6.684210526                                      |
| 0.088493924                                                | 14.36249566                                 | 50.3875                                          |
| 0.181812201                                                | 3.196701899                                 | 12.7615894                                       |
| 0.069140099                                                | 25.11710555                                 | 83.0139799                                       |
| 0.054698677                                                | 49.80601245                                 | 147.5848524                                      |
| 0.070070541                                                | 39.22309601                                 | 100.3455328                                      |
| 0.093874259                                                | 16.01338195                                 | 52.46131128                                      |
| 0.063749288                                                | 34.81872596                                 | 109.3546775                                      |
| 0.047370078                                                | 51.76545677                                 | 159.9296955                                      |
| 0.131836537                                                | 5.671897004                                 | 22.44708423                                      |
| 0.36                                                       | 0.56                                        | 3.8                                              |
| 0.272300102                                                | 1.030934294                                 | 6.203539823                                      |
| 0.133633333                                                | 5.122857612                                 | 21.05097451                                      |
| 0.047834662                                                | 52.65480022                                 | 166.5420714                                      |
| 0.082900469                                                | 19.76977456                                 | 63.1853562                                       |
| 0.219378694                                                | 1.703923681                                 | 9.168224299                                      |
| 0.147633761                                                | 4.265791399                                 | 17.95716946                                      |
| 0.12077461                                                 | 6.361238202                                 | 25.90629371                                      |
| 0.187343708                                                | 6.296953038                                 | 16.43307087                                      |
| 0.15052373                                                 | 5.488806674                                 | 18.70873786                                      |
| 0.195282299                                                | 4.56939306                                  | 13.51480638                                      |
| 0.134776086                                                | 6.671900903                                 | 23.69955157                                      |
| 0.041987696                                                | 50.38235877                                 | 212.3975825                                      |
| 0.141208639                                                | 5.106069664                                 | 20.77567371                                      |
| 0.182402278                                                | 3.366497384                                 | 12.63157895                                      |
| 0.508264463                                                | 0.289256198                                 | 3.272727273                                      |
| 0.317038844                                                | 0.9581535                                   | 4.849315068                                      |
| 0.062584583                                                | 41.24917436                                 | 115.7328431                                      |
| 0.137572425                                                | 9.026519466                                 | 25.48635236                                      |
| 0.102623671                                                | 11.65872987                                 | 39.94647887                                      |
| 0.195147144                                                | 2.106265647                                 | 11.41004184                                      |
| 0.042521095                                                | 59.7262576                                  | 205.9338404                                      |
| 0.228906215                                                | 2.181599465                                 | 8.695522388                                      |
| 0.192392265                                                | 2.913559465                                 | 11.18577982                                      |
| 0.270856772                                                | 1.244903797                                 | 6.165938865                                      |
| 0.163331099                                                | 3.691053018                                 | 15.22033898                                      |
| 0.132190683                                                | 5.939066846                                 | 23.27038627                                      |
| 0.118395862                                                | 6.175512335                                 | 26.57113402                                      |
| 0.069156855                                                | 34.47065647                                 | 91.70336482                                      |
| 0.061874468                                                | 26.52301398                                 | 95.09474718                                      |
| 0.081068195                                                | 20.13356032                                 | 66.28507295                                      |
| 0.279458882                                                | 1.133499466                                 | 5.679245283                                      |
| 0.140933943                                                | 4.660659602                                 | 19.82465278                                      |
| 0.319002268                                                | 0.827755102                                 | 4.714285714                                      |
| 0.0894718                                                  | 23.09713597                                 | 61.71473897                                      |
| 0.261675388                                                | 1.810064062                                 | 7.167832168                                      |
| 0.096446757                                                | 10.59476518                                 | 40.95535714                                      |
| 0.102366154                                                | 11.04167184                                 | 38.82377838                                      |
| 0.141780901                                                | 5.9405454                                   | 20.52028219                                      |
| 0.055457344                                                | 41.51648201                                 | 131.91597                                        |
| 0.046983394                                                | 56.48786451                                 | 186.7814288                                      |
| 0.042403403                                                | 64.92694733                                 | 214.0682554                                      |
| 0.221500533                                                | 1.957006978                                 | 9.004484305                                      |
| 0.165435519                                                | 5.335795629                                 | 16.74122807                                      |
| 0.206871811                                                | 4.232063138                                 | 13.28571429                                      |
| 0.120060847                                                | 7.383323996                                 | 26.83789704                                      |
| 0.07714136                                                 | 30.72950822                                 | 81.20044379                                      |
| 0.279041485                                                | 0.967163641                                 | 5.724832215                                      |
| 0.140860035                                                | 5.428241505                                 | 19.39768786                                      |
| 0.068602025                                                | 29.93812095                                 | 86.90708054                                      |
| 0.234131113                                                | 1.602497399                                 | 8.096774194                                      |
| 0.061998395                                                | 33.26369631                                 | 104.2414349                                      |
| 0.090727584                                                | 11.80485532                                 | 44.28542914                                      |
| 0.159812348                                                | 4.257504222                                 | 15.85479452                                      |
| 0.232476558                                                | 2.293692224                                 | 8.650254669                                      |
| 0.1736                                                     | 3.1744                                      | 13.16                                            |
| 0.573964497                                                | 0.213017751                                 | 1.923076923                                      |
| 0.08117143                                                 | 30.89095573                                 | 77.19364246                                      |
| 0.170122057                                                | 3.687629848                                 | 14.90131579                                      |
| 0.136753421                                                | 4.571745562                                 | 22.47115385                                      |
| 0.080724721                                                | 19.06993992                                 | 65.72946331                                      |
| 0.053842182                                                | 49.44382227                                 | 150.3486569                                      |
| 0.34542706                                                 | 0.630385488                                 | 4.079365079                                      |
| 0.173551038                                                | 3.588961938                                 | 14.17058824                                      |
| 0.291666667                                                | 0.909722222                                 | 6.75                                             |
| 0.252437051                                                | 1.647182807                                 | 7.699386503                                      |
| 0.151989796                                                | 5.129540816                                 | 17.93571429                                      |

|                                                              |                                                               |                                                               |
|--------------------------------------------------------------|---------------------------------------------------------------|---------------------------------------------------------------|
| log.sigma.5.0.mm.3D_gldm_LargeDependenceLowGrayLevelEmphasis | log.sigma.5.0.mm.3D_gldm_SmallDependenceHighGrayLevelEmphasis | log.sigma.5.0.mm.3D_gldm_LargeDependenceHighGrayLevelEmphasis |
| 0.806965503                                                  | 44.55363114                                                   | 1807.157895                                                   |
| 0.631055968                                                  | 14.26788544                                                   | 6221.697078                                                   |
| 0.517004084                                                  | 30.40727985                                                   | 598.9830508                                                   |
| 0.224125989                                                  | 52.71796491                                                   | 4651.930678                                                   |
| 0.306851286                                                  | 116.8318152                                                   | 699.0594059                                                   |
| 1.341392967                                                  | 29.43793499                                                   | 549.5368852                                                   |
| 3.20168648                                                   | 16.21962083                                                   | 169.5714286                                                   |
| 0.892247347                                                  | 73.08696753                                                   | 641.1246883                                                   |
| 0.079731458                                                  | 144.6997023                                                   | 6445.466802                                                   |
| 0.577296797                                                  | 18.54142788                                                   | 5455.464856                                                   |
| 2.988643528                                                  | 32.31433235                                                   | 545.3297872                                                   |
| 0.581705259                                                  | 25.47540687                                                   | 1924.792602                                                   |
| 3.189650486                                                  | 19.55093283                                                   | 846.5153734                                                   |
| 0.478883019                                                  | 51.510384                                                     | 1006.111742                                                   |
| 0.305364802                                                  | 56.48325055                                                   | 975.0934066                                                   |
| 1.122641547                                                  | 9.614481542                                                   | 60112.38733                                                   |
| 0.579375383                                                  | 67.07901562                                                   | 637.1013825                                                   |
| 1.518298965                                                  | 26.38872991                                                   | 1880.856959                                                   |
| 0.27110192                                                   | 107.6185333                                                   | 1022.43956                                                    |
| 1.212329919                                                  | 7.051168574                                                   | 7336.59589                                                    |
| 0.996454596                                                  | 8.15472541                                                    | 16675.11606                                                   |
| 1.195486405                                                  | 32.940932                                                     | 1383.825083                                                   |
| 0.45005289                                                   | 17.08264909                                                   | 16763.58801                                                   |
| 0.48038602                                                   | 63.105967                                                     | 1251.105263                                                   |
| 1.023413353                                                  | 11.75740598                                                   | 4204.879167                                                   |
| 0.45290265                                                   | 40.74518843                                                   | 895.615894                                                    |
| 0.949431225                                                  | 12.37205718                                                   | 9169.371778                                                   |
| 1.027148019                                                  | 9.464456022                                                   | 26592.68601                                                   |
| 0.473968097                                                  | 23.69918753                                                   | 26111.23735                                                   |
| 0.47635579                                                   | 14.98749092                                                   | 9957.625517                                                   |
| 0.985908785                                                  | 9.1520304                                                     | 15691.36825                                                   |
| 0.961425862                                                  | 15.07256784                                                   | 29206.63082                                                   |
| 0.507099919                                                  | 33.7123994                                                    | 2542.764579                                                   |
| 0.620305654                                                  | 29.82222222                                                   | 277.9333333                                                   |
| 0.164001286                                                  | 60.51488201                                                   | 612.9115044                                                   |
| 0.430641602                                                  | 35.21019427                                                   | 1691.958021                                                   |
| 1.123988957                                                  | 9.003421653                                                   | 28396.51666                                                   |
| 0.951253083                                                  | 13.63473868                                                   | 7712.121702                                                   |
| 0.177040604                                                  | 74.40390209                                                   | 1830.700935                                                   |
| 0.766603783                                                  | 28.55578378                                                   | 1364.646182                                                   |
| 0.202948438                                                  | 33.05061073                                                   | 4680.106294                                                   |
| 1.190638836                                                  | 57.8532631                                                    | 608.2939633                                                   |
| 0.687373601                                                  | 36.63020315                                                   | 890.7524272                                                   |
| 2.064469972                                                  | 56.94424963                                                   | 639.5353075                                                   |
| 0.497723827                                                  | 35.13695661                                                   | 1976.412556                                                   |
| 2.413477341                                                  | 2.441286302                                                   | 21811.88157                                                   |
| 0.27952644                                                   | 41.87906032                                                   | 2788.876184                                                   |
| 1.396803338                                                  | 45.03169143                                                   | 577.2631579                                                   |
| 0.540389715                                                  | 28.81818182                                                   | 106.7727273                                                   |
| 0.058262521                                                  | 165.4581126                                                   | 1174.253425                                                   |
| 0.786112251                                                  | 13.1332535                                                    | 20376.9473                                                    |
| 1.34250325                                                   | 29.87898073                                                   | 772.8014888                                                   |
| 0.423865235                                                  | 22.0548731                                                    | 6307.213772                                                   |
| 0.338747514                                                  | 34.55072259                                                   | 1081.669456                                                   |
| 1.561166726                                                  | 7.013220302                                                   | 30383.16266                                                   |
| 0.319913897                                                  | 80.38216514                                                   | 887.2119403                                                   |
| 0.256946752                                                  | 60.30615555                                                   | 1011.569954                                                   |
| 0.105655651                                                  | 157.5726828                                                   | 1873.347162                                                   |
| 0.622472018                                                  | 37.77184697                                                   | 1088.646893                                                   |
| 2.21914787                                                   | 20.29830725                                                   | 1465.796137                                                   |
| 0.985007416                                                  | 19.9344924                                                    | 1563.779381                                                   |
| 0.349177729                                                  | 38.89782732                                                   | 27877.00015                                                   |
| 1.794499168                                                  | 6.814345523                                                   | 7941.175749                                                   |
| 1.256396674                                                  | 7.048833783                                                   | 5480.804153                                                   |
| 0.205507047                                                  | 37.72775681                                                   | 331.0188679                                                   |
| 0.424049297                                                  | 34.99871746                                                   | 2454.056424                                                   |
| 0.228611683                                                  | 99.5151455                                                    | 495.6380952                                                   |
| 0.77649557                                                   | 18.76830873                                                   | 10725.48803                                                   |
| 0.382527306                                                  | 72.25533023                                                   | 534.4195804                                                   |
| 0.520800185                                                  | 18.89666325                                                   | 5319.94029                                                    |
| 0.509231024                                                  | 20.28273812                                                   | 5008.054636                                                   |
| 0.634780873                                                  | 39.0483574                                                    | 1372.299824                                                   |
| 0.971601005                                                  | 8.501053549                                                   | 22176.74352                                                   |
| 2.647601458                                                  | 3.462307334                                                   | 18797.34567                                                   |
| 1.261619923                                                  | 11.90503485                                                   | 39107.97782                                                   |
| 0.691225636                                                  | 65.05551221                                                   | 887.1636771                                                   |
| 0.942147942                                                  | 36.54510467                                                   | 632.2763158                                                   |
| 1.693118851                                                  | 42.70378627                                                   | 417.0089286                                                   |
| 1.507262081                                                  | 17.33675477                                                   | 1162.719606                                                   |
| 0.344925009                                                  | 27.25392592                                                   | 22026.59541                                                   |
| 0.107045344                                                  | 85.46821402                                                   | 691.8389262                                                   |
| 0.275383401                                                  | 50.99790254                                                   | 2290.716763                                                   |
| 0.49884222                                                   | 23.2138374                                                    | 19501.47393                                                   |
| 0.414219981                                                  | 14.66585125                                                   | 272.2258065                                                   |
| 1.018810103                                                  | 10.3396477                                                    | 13366.16002                                                   |
| 0.862210143                                                  | 16.07857782                                                   | 3139.561734                                                   |
| 1.205746033                                                  | 38.02869961                                                   | 642.2876712                                                   |
| 0.081023302                                                  | 132.1494336                                                   | 1657.886248                                                   |
| 0.526353318                                                  | 19.36694705                                                   | 464.52                                                        |
| 0.219378501                                                  | 26.88461538                                                   | 41.30769231                                                   |
| 0.311327189                                                  | 33.76738614                                                   | 23469.04112                                                   |
| 2.123050577                                                  | 30.61483707                                                   | 480.2664474                                                   |
| 2.81656575                                                   | 11.59349379                                                   | 794.2788462                                                   |
| 0.797435805                                                  | 10.40622142                                                   | 9071.148412                                                   |
| 1.317194044                                                  | 7.834748163                                                   | 20944.27984                                                   |
| 0.044462081                                                  | 122.1090168                                                   | 913.9206349                                                   |
| 0.30580643                                                   | 63.53728596                                                   | 1808.430882                                                   |
| 2.426440618                                                  | 7.863715278                                                   | 65.125                                                        |
| 0.138536578                                                  | 65.34552345                                                   | 1237.521472                                                   |
| 0.52412882                                                   | 33.0378486                                                    | 2177.046429                                                   |

| log.sigma.5.0.mm.3D_gldm_SmallDependenceLowGrayLevelEmphasis | log.sigma.5.0.mm.3D_gldm_LowGrayLevelEmphasis | log.sigma.5.0.mm.3D_gldm_DistanceZoneVariabilityNormalized |
|--------------------------------------------------------------|-----------------------------------------------|------------------------------------------------------------|
| 0.003850472                                                  | 0.037437358                                   | 0.961919125                                                |
| 0.00250943                                                   | 0.02160204                                    | 0.985816327                                                |
| 0.007634593                                                  | 0.041535074                                   | 1                                                          |
| 0.001716989                                                  | 0.010343485                                   | 0.927252088                                                |
| 0.008999322                                                  | 0.036766719                                   | 0.967222222                                                |
| 0.005854067                                                  | 0.051186826                                   | 0.974363299                                                |
| 0.015713489                                                  | 0.149593294                                   | 1                                                          |
| 0.006560564                                                  | 0.046759536                                   | 0.967042227                                                |
| 0.002217945                                                  | 0.006888375                                   | 0.503617106                                                |
| 0.001699639                                                  | 0.014643237                                   | 0.992366524                                                |
| 0.006546089                                                  | 0.069951481                                   | 0.95240928                                                 |
| 0.004167474                                                  | 0.026407272                                   | 0.987578125                                                |
| 0.00492674                                                   | 0.076004617                                   | 0.913940115                                                |
| 0.00366633                                                   | 0.023970256                                   | 0.976881776                                                |
| 0.006046031                                                  | 0.021837705                                   | 0.930645412                                                |
| 0.000379987                                                  | 0.005541191                                   | 0.962107708                                                |
| 0.006339302                                                  | 0.034130756                                   | 0.980584391                                                |
| 0.003362503                                                  | 0.039691874                                   | 0.961197195                                                |
| 0.006814522                                                  | 0.029237868                                   | 0.918515165                                                |
| 0.001610488                                                  | 0.025321731                                   | 0.957239691                                                |
| 0.001525005                                                  | 0.013733215                                   | 0.973313381                                                |
| 0.003005335                                                  | 0.035060485                                   | 0.955969483                                                |
| 0.001048176                                                  | 0.008065832                                   | 0.991631947                                                |
| 0.011948901                                                  | 0.049442439                                   | 1                                                          |
| 0.003626997                                                  | 0.025555767                                   | 1                                                          |
| 0.005681974                                                  | 0.029846432                                   | 0.963648834                                                |
| 0.00121302                                                   | 0.016034737                                   | 0.979383681                                                |
| 0.001105864                                                  | 0.013707265                                   | 0.992126107                                                |
| 0.001008888                                                  | 0.008944161                                   | 0.962582021                                                |
| 0.00264014                                                   | 0.017246463                                   | 0.933779592                                                |
| 0.001151077                                                  | 0.013968529                                   | 0.984704142                                                |
| 0.000678                                                     | 0.008673089                                   | 0.963092763                                                |
| 0.003288219                                                  | 0.02385192                                    | 0.94506112                                                 |
| 0.064159194                                                  | 0.173919248                                   | 1                                                          |
| 0.01425271                                                   | 0.028804151                                   | 1                                                          |
| 0.00321328                                                   | 0.018350905                                   | 0.910066667                                                |
| 0.00104667                                                   | 0.012195393                                   | 0.959821429                                                |
| 0.001756552                                                  | 0.021146239                                   | 0.979616251                                                |
| 0.005892313                                                  | 0.017206252                                   | 0.906476754                                                |
| 0.005538844                                                  | 0.0329659                                     | 0.969704142                                                |
| 0.003125344                                                  | 0.011554817                                   | 0.957766161                                                |
| 0.008732633                                                  | 0.046296673                                   | 0.937173216                                                |
| 0.005927067                                                  | 0.030214502                                   | 0.961255448                                                |
| 0.006897481                                                  | 0.069709226                                   | 0.955578512                                                |
| 0.002970026                                                  | 0.020355538                                   | 0.893872679                                                |
| 0.000924145                                                  | 0.017492493                                   | 0.98726167                                                 |
| 0.002007484                                                  | 0.013032178                                   | 0.686379965                                                |
| 0.006451231                                                  | 0.055318659                                   | 0.953514739                                                |
| 0.038662641                                                  | 0.137885721                                   | 1                                                          |
| 0.012146925                                                  | 0.016738219                                   | 0.910311419                                                |
| 0.001065707                                                  | 0.011225148                                   | 0.986949745                                                |
| 0.006436902                                                  | 0.035917488                                   | 0.922688                                                   |
| 0.001727972                                                  | 0.014810805                                   | 0.894254609                                                |
| 0.00757126                                                   | 0.027114043                                   | 0.972227733                                                |
| 0.00077809                                                   | 0.011591607                                   | 0.974415832                                                |
| 0.006138578                                                  | 0.02030226                                    | 0.935555556                                                |
| 0.004521283                                                  | 0.017485281                                   | 0.966207174                                                |
| 0.003572269                                                  | 0.014069235                                   | 0.872091952                                                |
| 0.005094441                                                  | 0.031852207                                   | 0.962976148                                                |
| 0.004365091                                                  | 0.055399467                                   | 0.942358592                                                |
| 0.003435767                                                  | 0.034805433                                   | 0.894255647                                                |
| 0.000835111                                                  | 0.005911621                                   | 0.906831938                                                |
| 0.002127486                                                  | 0.028006685                                   | 0.993031444                                                |
| 0.003795137                                                  | 0.028967411                                   | 1                                                          |
| 0.03086305                                                   | 0.04839837                                    | 0.933412604                                                |
| 0.002775843                                                  | 0.020539972                                   | 0.950850929                                                |
| 0.009696775                                                  | 0.040122373                                   | 0.967750605                                                |
| 0.002135458                                                  | 0.022357483                                   | 0.881960629                                                |
| 0.012275939                                                  | 0.031344408                                   | 0.948088889                                                |
| 0.002373358                                                  | 0.015556934                                   | 0.958381212                                                |
| 0.002519653                                                  | 0.017694933                                   | 0.958577286                                                |
| 0.00484287                                                   | 0.024883925                                   | 0.961553249                                                |
| 0.000836657                                                  | 0.012454738                                   | 0.973409086                                                |
| 0.001859421                                                  | 0.029192373                                   | 0.986154252                                                |
| 0.000613236                                                  | 0.008459146                                   | 0.948638996                                                |
| 0.0050931                                                    | 0.030681096                                   | 0.956066153                                                |
| 0.007147479                                                  | 0.031132182                                   | 0.949079414                                                |
| 0.009194593                                                  | 0.047557922                                   | 0.976193932                                                |
| 0.008113032                                                  | 0.064852409                                   | 1                                                          |
| 0.001101675                                                  | 0.006517577                                   | 0.973426748                                                |
| 0.010159631                                                  | 0.019889195                                   | 0.975004006                                                |
| 0.004237949                                                  | 0.014630526                                   | 0.951642647                                                |
| 0.000863949                                                  | 0.008924475                                   | 0.902868128                                                |
| 0.045627399                                                  | 0.081900554                                   | 1                                                          |
| 0.001331395                                                  | 0.014497477                                   | 0.978879018                                                |
| 0.002020598                                                  | 0.018505321                                   | 0.961470986                                                |
| 0.005455769                                                  | 0.046919392                                   | 0.983194484                                                |
| 0.003246546                                                  | 0.010244968                                   | 0.964550561                                                |
| 0.028778531                                                  | 0.053847205                                   | 1                                                          |
| 0.119218244                                                  | 0.139250296                                   | 0.702479339                                                |
| 0.001051933                                                  | 0.007025537                                   | 0.928367117                                                |
| 0.009070756                                                  | 0.086733893                                   | 1                                                          |
| 0.00885588                                                   | 0.079143557                                   | 0.973688889                                                |
| 0.002075392                                                  | 0.019551634                                   | 0.949765779                                                |
| 0.001218505                                                  | 0.014918599                                   | 0.96403275                                                 |
| 0.020706547                                                  | 0.024368626                                   | 1                                                          |
| 0.003008948                                                  | 0.018040046                                   | 0.858611296                                                |
| 0.040592335                                                  | 0.258020479                                   | 1                                                          |
| 0.010635033                                                  | 0.02426558                                    | 1                                                          |
| 0.014944125                                                  | 0.042885234                                   | 1                                                          |

| log.sigma.5.0.mm.3D_gldzm_LowIntensityEmphasis | log.sigma.5.0.mm.3D_gldzm_LargeDistanceEmphasis | log.sigma.5.0.mm.3D_gldzm_HighIntensitySmallDistanceEmphasis |
|------------------------------------------------|-------------------------------------------------|--------------------------------------------------------------|
| 0.023270984                                    | 1.058252427                                     | 170.8276699                                                  |
| 0.029763868                                    | 1.021428571                                     | 140.1517857                                                  |
| 0.035166113                                    | 1                                               | 102.5967742                                                  |
| 0.009935387                                    | 1.164319249                                     | 264.3604754                                                  |
| 0.027337731                                    | 1.05                                            | 233.0833333                                                  |
| 0.030314944                                    | 1.038961039                                     | 110.25                                                       |
| 0.072148772                                    | 1                                               | 48.71428571                                                  |
| 0.020863464                                    | 1.05027933                                      | 188.472067                                                   |
| 0.007171058                                    | 2.397790055                                     | 253.3508287                                                  |
| 0.016950285                                    | 1.011494253                                     | 166.7021073                                                  |
| 0.033518086                                    | 1.073170732                                     | 117.2804878                                                  |
| 0.026132235                                    | 1.01875                                         | 135.5453125                                                  |
| 0.038089736                                    | 1.203252033                                     | 122.6686992                                                  |
| 0.016832831                                    | 1.035087719                                     | 186.9210526                                                  |
| 0.01910583                                     | 1.107913669                                     | 176.6151079                                                  |
| 0.009538789                                    | 1.069879518                                     | 233.3239625                                                  |
| 0.023661543                                    | 1.029411765                                     | 168.1102941                                                  |
| 0.021351651                                    | 1.075657895                                     | 149.2055921                                                  |
| 0.022757848                                    | 1.127659574                                     | 251.9308511                                                  |
| 0.024630303                                    | 1.06557377                                      | 98.82240437                                                  |
| 0.026922457                                    | 1.097643098                                     | 121.389263                                                   |
| 0.01652614                                     | 1.067567568                                     | 164.5416667                                                  |
| 0.013563123                                    | 1.012605042                                     | 197.8193277                                                  |
| 0.036069043                                    | 1                                               | 155.4782609                                                  |
| 0.029970714                                    | 1                                               | 98.60330579                                                  |
| 0.023572601                                    | 1.055555556                                     | 132.6712963                                                  |
| 0.018034003                                    | 1.03125                                         | 143.703125                                                   |
| 0.020098881                                    | 1.011857708                                     | 131.5899209                                                  |
| 0.011749021                                    | 1.080760095                                     | 210.0796384                                                  |
| 0.03122071                                     | 1.102857143                                     | 132.2614286                                                  |
| 0.018846529                                    | 1.069230769                                     | 136.975                                                      |
| 0.009493735                                    | 1.064162754                                     | 210.3963224                                                  |
| 0.021408135                                    | 1.084805654                                     | 173.6183746                                                  |
| 0.150935164                                    | 1                                               | 56.1                                                         |
| 0.035372328                                    | 1                                               | 150.6363636                                                  |
| 0.016447448                                    | 1.23                                            | 168.850463                                                   |
| 0.018285837                                    | 1.099489796                                     | 137.8003118                                                  |
| 0.017844853                                    | 1.047945205                                     | 145.1938737                                                  |
| 0.018681618                                    | 1.147540984                                     | 234.2868852                                                  |
| 0.028832483                                    | 1.046153846                                     | 127.8384615                                                  |
| 0.018261041                                    | 1.064748201                                     | 187.5881295                                                  |
| 0.029550135                                    | 1.097402597                                     | 165.4902597                                                  |
| 0.023569284                                    | 1.059288538                                     | 137.1116601                                                  |
| 0.02675681                                     | 1.068181818                                     | 163.6306818                                                  |
| 0.017137131                                    | 1.168674699                                     | 173.0742972                                                  |
| 0.03139183                                     | 1.019230769                                     | 71.86698718                                                  |
| 0.011819072                                    | 2.082332762                                     | 169.9534972                                                  |
| 0.030114059                                    | 1.071428571                                     | 138.6577381                                                  |
| 0.111921225                                    | 1                                               | 51.64285714                                                  |
| 0.022091926                                    | 1.141176471                                     | 337.2205882                                                  |
| 0.015321356                                    | 1.036065574                                     | 165.2237705                                                  |
| 0.024104132                                    | 1.16                                            | 112.6148889                                                  |
| 0.017105463                                    | 1.226506024                                     | 165.3005355                                                  |
| 0.029673565                                    | 1.042253521                                     | 137.1161972                                                  |
| 0.015626853                                    | 1.04805915                                      | 130.8754364                                                  |
| 0.016888768                                    | 1.1                                             | 211.3716667                                                  |
| 0.014109116                                    | 1.051575931                                     | 169.6769341                                                  |
| 0.011355785                                    | 1.206008584                                     | 369.9881974                                                  |
| 0.026137686                                    | 1.056603774                                     | 145.9764151                                                  |
| 0.028396449                                    | 1.089108911                                     | 110.4975248                                                  |
| 0.025911473                                    | 1.187250996                                     | 117.7849712                                                  |
| 0.007105012                                    | 1.170035672                                     | 317.3947021                                                  |
| 0.033012391                                    | 1.01048951                                      | 90.51048951                                                  |
| 0.043094812                                    | 1                                               | 78.34375                                                     |
| 0.062134267                                    | 1.103448276                                     | 82.35344828                                                  |
| 0.015908678                                    | 1.075630252                                     | 177.3813025                                                  |
| 0.030862061                                    | 1.049180328                                     | 190.9385246                                                  |
| 0.020406644                                    | 1.27816092                                      | 151.0474457                                                  |
| 0.028322635                                    | 1.08                                            | 161.27                                                       |
| 0.017833703                                    | 1.084745763                                     | 144.9422081                                                  |
| 0.019776237                                    | 1.07651715                                      | 148.5352536                                                  |
| 0.020062394                                    | 1.058823529                                     | 163.2859477                                                  |
| 0.014957496                                    | 1.040431267                                     | 142.3712938                                                  |
| 0.04734807                                     | 1.032482599                                     | 72.13444187                                                  |
| 0.00990373                                     | 1.090909091                                     | 205.7776449                                                  |
| 0.01999156                                     | 1.06741573                                      | 192.491573                                                   |
| 0.022636805                                    | 1.078431373                                     | 124.5179739                                                  |
| 0.028090116                                    | 1.036144578                                     | 136.6174699                                                  |
| 0.060085643                                    | 1                                               | 91.47089947                                                  |
| 0.010486557                                    | 1.04040404                                      | 246.9646465                                                  |
| 0.022728728                                    | 1.037974684                                     | 195.4208861                                                  |
| 0.015689095                                    | 1.074380165                                     | 204.8904959                                                  |
| 0.009906725                                    | 1.17254902                                      | 220.4344227                                                  |
| 0.118280959                                    | 1                                               | 41.71428571                                                  |
| 0.017498384                                    | 1.119680851                                     | 133.466117                                                   |
| 0.015070144                                    | 1.058951965                                     | 129.720524                                                   |
| 0.025410488                                    | 1.025423729                                     | 135.0021186                                                  |
| 0.009893086                                    | 1.054151625                                     | 330.4891697                                                  |
| 0.082300985                                    | 1                                               | 57.73684211                                                  |
| 0.148785703                                    | 1.545454545                                     | 32.56818182                                                  |
| 0.00939929                                     | 1.122270742                                     | 254.0440927                                                  |
| 0.031256627                                    | 1                                               | 125.1264368                                                  |
| 0.070514079                                    | 1.04                                            | 73.15                                                        |
| 0.029145383                                    | 1.131410256                                     | 114.8264779                                                  |
| 0.021145176                                    | 1.08616188                                      | 131.1515992                                                  |
| 0.035058462                                    | 1                                               | 235.7179487                                                  |
| 0.014292806                                    | 1.229665072                                     | 238.4150718                                                  |
| 0.158275742                                    | 1                                               | 23.09090909                                                  |
| 0.028771119                                    | 1                                               | 170.5066667                                                  |
| 0.058480808                                    | 1                                               | 120.5978261                                                  |

| log.sigma.5.0.mm.3D_gldzm_LowIntensityLargeDistanceEmphasis | log.sigma.5.0.mm.3D_gldzm_HighIntensityEmphasis | log.sigma.5.0.mm.3D_gldzm_DistanceZoneVariability | log.sigma.5.0.mm.3D_gldzm_ZonePercentage |
|-------------------------------------------------------------|-------------------------------------------------|---------------------------------------------------|------------------------------------------|
| 0.024439628                                                 | 171.6796117                                     | 99.0776699                                        | 0.28531856                               |
| 0.05119244                                                  | 140.1571429                                     | 138.0142857                                       | 0.099786172                              |
| 0.035166113                                                 | 102.5967742                                     | 62                                                | 0.350282486                              |
| 0.015061711                                                 | 266.8497653                                     | 395.0093897                                       | 0.220382825                              |
| 0.028118981                                                 | 233.8833333                                     | 58.03333333                                       | 0.594059406                              |
| 0.069275983                                                 | 110.2597403                                     | 75.02597403                                       | 0.31557377                               |
| 0.072148772                                                 | 48.71428571                                     | 28                                                | 0.4                                      |
| 0.043675382                                                 | 188.5307263                                     | 173.1005587                                       | 0.44638404                               |
| 0.010803066                                                 | 464.412523                                      | 273.4640884                                       | 0.367886179                              |
| 0.016990058                                                 | 167.532567                                      | 259.0076628                                       | 0.112548512                              |
| 0.064981501                                                 | 117.4634146                                     | 117.1463415                                       | 0.32712766                               |
| 0.028215569                                                 | 135.5875                                        | 158.0125                                          | 0.211360634                              |
| 0.071342574                                                 | 123.9796748                                     | 224.8292683                                       | 0.180087848                              |
| 0.01899874                                                  | 187.3157895                                     | 167.0467836                                       | 0.323863636                              |
| 0.043088144                                                 | 177.4892086                                     | 129.3597122                                       | 0.381868132                              |
| 0.010494323                                                 | 234.739759                                      | 399.2746988                                       | 0.038326561                              |
| 0.053073308                                                 | 168.1176471                                     | 100.0196078                                       | 0.470046083                              |
| 0.023518369                                                 | 150.1546053                                     | 292.2039474                                       | 0.195876289                              |
| 0.057947958                                                 | 253                                             | 86.34042553                                       | 0.516483516                              |
| 0.026332122                                                 | 99.53551913                                     | 175.1748634                                       | 0.065969719                              |
| 0.028011365                                                 | 122.5319865                                     | 289.0740741                                       | 0.058522167                              |
| 0.018204075                                                 | 165.6801802                                     | 212.2252252                                       | 0.244224422                              |
| 0.013913263                                                 | 197.9327731                                     | 236.0084034                                       | 0.081506849                              |
| 0.036069043                                                 | 155.4782609                                     | 69                                                | 0.518796992                              |
| 0.029970714                                                 | 98.60330579                                     | 121                                               | 0.126041667                              |
| 0.051693314                                                 | 133.2407407                                     | 104.0740741                                       | 0.357615894                              |
| 0.019444593                                                 | 143.90625                                       | 188.0416667                                       | 0.083879423                              |
| 0.020196878                                                 | 131.9486166                                     | 251.0079051                                       | 0.064955071                              |
| 0.0127367                                                   | 211.6365796                                     | 405.2470309                                       | 0.113293864                              |
| 0.035768339                                                 | 133.4228571                                     | 163.4114286                                       | 0.103366804                              |
| 0.019376356                                                 | 137.8230769                                     | 256.0230769                                       | 0.061890026                              |
| 0.010427227                                                 | 212.0109546                                     | 615.4162754                                       | 0.072342353                              |
| 0.044318176                                                 | 174.3816254                                     | 267.4522968                                       | 0.203743701                              |
| 0.150935164                                                 | 56.1                                            | 10                                                | 0.666666667                              |
| 0.035372328                                                 | 150.6363636                                     | 55                                                | 0.486725664                              |
| 0.03291415                                                  | 172.5466667                                     | 273.02                                            | 0.224887556                              |
| 0.021432605                                                 | 138.9336735                                     | 376.25                                            | 0.058586161                              |
| 0.018739458                                                 | 145.6883562                                     | 286.0479452                                       | 0.096306069                              |
| 0.044716259                                                 | 237.7295082                                     | 110.5901639                                       | 0.380062305                              |
| 0.040370944                                                 | 127.8846154                                     | 126.0615385                                       | 0.242085661                              |
| 0.019657258                                                 | 188.5971223                                     | 133.1294964                                       | 0.194405594                              |
| 0.061476541                                                 | 165.7532468                                     | 144.3246753                                       | 0.404199475                              |
| 0.042838058                                                 | 137.2332016                                     | 243.1976285                                       | 0.307038835                              |
| 0.046391936                                                 | 164.0909091                                     | 168.1818182                                       | 0.400911162                              |
| 0.038515344                                                 | 180.0923695                                     | 222.5742972                                       | 0.223318386                              |
| 0.0506226                                                   | 71.87179487                                     | 154.0128205                                       | 0.025481869                              |
| 0.019659321                                                 | 225.3207547                                     | 400.1595197                                       | 0.212308813                              |
| 0.074756916                                                 | 138.702381                                      | 80.0952381                                        | 0.368421053                              |
| 0.111921225                                                 | 51.64285714                                     | 14                                                | 0.636363636                              |
| 0.07085143                                                  | 337.7764706                                     | 77.37647059                                       | 0.582191781                              |
| 0.025273997                                                 | 165.8819672                                     | 301.0196721                                       | 0.074754902                              |
| 0.053760595                                                 | 113.52                                          | 115.336                                           | 0.310173697                              |
| 0.022676249                                                 | 168.5108434                                     | 371.1156627                                       | 0.129890454                              |
| 0.071927086                                                 | 137.1267606                                     | 69.02816901                                       | 0.29707113                               |
| 0.017585717                                                 | 131.3197782                                     | 527.1589649                                       | 0.047850699                              |
| 0.044738768                                                 | 211.7266667                                     | 140.3333333                                       | 0.447761194                              |
| 0.017429918                                                 | 170.3495702                                     | 337.2063037                                       | 0.400229358                              |
| 0.034562029                                                 | 372.193133                                      | 203.1974249                                       | 0.508733624                              |
| 0.027847351                                                 | 146.5                                           | 102.0754717                                       | 0.299435028                              |
| 0.032266086                                                 | 111.0693069                                     | 95.17821782                                       | 0.216738197                              |
| 0.029226186                                                 | 121.5657371                                     | 224.4581673                                       | 0.172508591                              |
| 0.015353567                                                 | 320.8739596                                     | 762.6456599                                       | 0.124114522                              |
| 0.035634769                                                 | 90.52097902                                     | 284.006993                                        | 0.070201276                              |
| 0.043094812                                                 | 78.34375                                        | 160                                               | 0.089786756                              |
| 0.165582543                                                 | 82.37931034                                     | 27.06896552                                       | 0.547169811                              |
| 0.032400848                                                 | 178.3235294                                     | 226.302521                                        | 0.206597222                              |
| 0.080042389                                                 | 190.9508197                                     | 59.03278689                                       | 0.580952381                              |
| 0.031529891                                                 | 155.0873563                                     | 383.6528736                                       | 0.125468705                              |
| 0.078322635                                                 | 161.32                                          | 71.10666667                                       | 0.524475524                              |
| 0.034959409                                                 | 145.4279661                                     | 226.1779661                                       | 0.131696429                              |
| 0.032983019                                                 | 149.4564644                                     | 363.3007916                                       | 0.145825317                              |
| 0.040854711                                                 | 163.6535948                                     | 147.1176471                                       | 0.26984127                               |
| 0.024098768                                                 | 142.7493261                                     | 361.1347709                                       | 0.052571914                              |
| 0.054744958                                                 | 72.44779582                                     | 425.0324826                                       | 0.039782167                              |
| 0.016135502                                                 | 207.7296651                                     | 793.062201                                        | 0.057579723                              |
| 0.030635144                                                 | 192.7696629                                     | 170.1797753                                       | 0.399103139                              |
| 0.052354942                                                 | 124.875817                                      | 145.2091503                                       | 0.335526316                              |
| 0.064234694                                                 | 136.626506                                      | 81.02409639                                       | 0.370535714                              |
| 0.060085643                                                 | 91.47089947                                     | 189                                               | 0.207009858                              |
| 0.010858174                                                 | 248.2424242                                     | 289.1077441                                       | 0.109837278                              |
| 0.060703412                                                 | 195.4303797                                     | 77.02531646                                       | 0.530201342                              |
| 0.034942233                                                 | 206.3099174                                     | 230.2975207                                       | 0.279768786                              |
| 0.015350544                                                 | 223.2019608                                     | 460.4627451                                       | 0.103469264                              |
| 0.118280959                                                 | 41.71428571                                     | 14                                                | 0.451612903                              |
| 0.02096082                                                  | 134.412234                                      | 368.0585106                                       | 0.075775897                              |
| 0.025870671                                                 | 130.1004367                                     | 440.3537118                                       | 0.130595951                              |
| 0.02592934                                                  | 135.3135593                                     | 116.0169492                                       | 0.23287671                               |
| 0.014135577                                                 | 331.7184116                                     | 267.1805054                                       | 0.470288625                              |
| 0.082300985                                                 | 57.73684211                                     | 19                                                | 0.38                                     |
| 0.489694794                                                 | 32.90909091                                     | 7.727272727                                       | 0.846153846                              |
| 0.012864174                                                 | 257.4934498                                     | 425.1921397                                       | 0.133566638                              |
| 0.031256627                                                 | 125.1264368                                     | 87                                                | 0.286184211                              |
| 0.110514079                                                 | 73.16                                           | 73.02666667                                       | 0.180288462                              |
| 0.042912393                                                 | 116.4679487                                     | 296.3269231                                       | 0.08543264                               |
| 0.032456662                                                 | 131.9843342                                     | 369.2245431                                       | 0.053032401                              |
| 0.035058462                                                 | 235.7179487                                     | 39                                                | 0.619047619                              |
| 0.040899631                                                 | 240.4784689                                     | 179.4497608                                       | 0.307352941                              |
| 0.158275742                                                 | 23.09090909                                     | 11                                                | 0.458333333                              |
| 0.028771119                                                 | 170.5066667                                     | 75                                                | 0.460122699                              |
| 0.058480808                                                 | 120.5978261                                     | 92                                                | 0.328571429                              |

| log.sigma.5.0.mm.3D_gldzm_IntensityVariabilityNormalized | log.sigma.5.0.mm.3D_gldzm_LowIntensitySmallDistanceEmphasis | log.sigma.5.0.mm.3D_gldzm_IntensityVariability |
|----------------------------------------------------------|-------------------------------------------------------------|------------------------------------------------|
| 0.061740032                                              | 0.022978823                                                 | 6.359223301                                    |
| 0.086020408                                              | 0.024406725                                                 | 12.04285714                                    |
| 0.090010406                                              | 0.035166113                                                 | 5.580645161                                    |
| 0.056227821                                              | 0.008726964                                                 | 23.95305164                                    |
| 0.051111111                                              | 0.027142419                                                 | 3.066666667                                    |
| 0.085511891                                              | 0.020574684                                                 | 6.584415584                                    |
| 0.130102041                                              | 0.072148772                                                 | 3.642857143                                    |
| 0.054399051                                              | 0.015160485                                                 | 9.737430168                                    |
| 0.037236009                                              | 0.006344628                                                 | 20.21915285                                    |
| 0.071974868                                              | 0.016940342                                                 | 18.78544061                                    |
| 0.079648357                                              | 0.025652233                                                 | 9.796747967                                    |
| 0.06484375                                               | 0.025611402                                                 | 10.375                                         |
| 0.070824245                                              | 0.029946617                                                 | 17.42276423                                    |
| 0.071714374                                              | 0.016291354                                                 | 12.26315789                                    |
| 0.063713058                                              | 0.013110251                                                 | 8.856115108                                    |
| 0.08425606                                               | 0.009322032                                                 | 34.96626506                                    |
| 0.065936178                                              | 0.016308602                                                 | 6.725490196                                    |
| 0.077345914                                              | 0.020835353                                                 | 23.51315789                                    |
| 0.049796288                                              | 0.01396032                                                  | 4.680851064                                    |
| 0.099166891                                              | 0.024204849                                                 | 18.14754098                                    |
| 0.087462731                                              | 0.026735956                                                 | 25.97643098                                    |
| 0.070286503                                              | 0.016106656                                                 | 15.6036036                                     |
| 0.078525528                                              | 0.013475588                                                 | 18.68907563                                    |
| 0.059021214                                              | 0.036069043                                                 | 4.072463768                                    |
| 0.085991394                                              | 0.029970714                                                 | 10.40495868                                    |
| 0.085733882                                              | 0.016542423                                                 | 9.259259259                                    |
| 0.081705729                                              | 0.017681355                                                 | 15.6875                                        |
| 0.084597478                                              | 0.020074381                                                 | 21.40316206                                    |
| 0.064934186                                              | 0.011536045                                                 | 27.33729216                                    |
| 0.067755102                                              | 0.030083803                                                 | 11.85714286                                    |
| 0.077011834                                              | 0.018769262                                                 | 20.02307692                                    |
| 0.076618641                                              | 0.009268009                                                 | 48.95931142                                    |
| 0.060470227                                              | 0.015680625                                                 | 17.1130742                                     |
| 0.1                                                      | 0.150935164                                                 | 1                                              |
| 0.063801653                                              | 0.035372328                                                 | 3.509090909                                    |
| 0.069888889                                              | 0.012439788                                                 | 20.96666667                                    |
| 0.075372241                                              | 0.017606771                                                 | 29.54591837                                    |
| 0.074338334                                              | 0.017659254                                                 | 21.70547945                                    |
| 0.056839559                                              | 0.012172958                                                 | 6.93442623                                     |
| 0.069112426                                              | 0.025947868                                                 | 8.984615385                                    |
| 0.071787175                                              | 0.017911987                                                 | 9.978417266                                    |
| 0.058610221                                              | 0.021568533                                                 | 9.025974026                                    |
| 0.079566936                                              | 0.01875209                                                  | 20.13043478                                    |
| 0.057592975                                              | 0.021848028                                                 | 10.13636364                                    |
| 0.067498911                                              | 0.011792578                                                 | 16.80722892                                    |
| 0.116206443                                              | 0.026584138                                                 | 18.12820513                                    |
| 0.059828356                                              | 0.010162806                                                 | 34.87993139                                    |
| 0.073979592                                              | 0.018953344                                                 | 6.214285714                                    |
| 0.112244898                                              | 0.111921225                                                 | 1.571428571                                    |
| 0.041107266                                              | 0.00990205                                                  | 3.494117647                                    |
| 0.074076861                                              | 0.012849387                                                 | 22.59344262                                    |
| 0.087872                                                 | 0.016828906                                                 | 10.984                                         |
| 0.06783568                                               | 0.015835187                                                 | 28.15180723                                    |
| 0.078357469                                              | 0.019110185                                                 | 5.563380282                                    |
| 0.088215497                                              | 0.015157675                                                 | 47.7245841                                     |
| 0.060444444                                              | 0.009926268                                                 | 9.066666667                                    |
| 0.070582343                                              | 0.013278915                                                 | 24.63323782                                    |
| 0.049236494                                              | 0.005554225                                                 | 11.472103                                      |
| 0.067817729                                              | 0.025710269                                                 | 7.188679245                                    |
| 0.076365062                                              | 0.02742904                                                  | 7.712871287                                    |
| 0.083982794                                              | 0.02510538                                                  | 21.07968127                                    |
| 0.053485107                                              | 0.00506565                                                  | 44.98097503                                    |
| 0.086141132                                              | 0.032356797                                                 | 24.63636364                                    |
| 0.102890625                                              | 0.043094812                                                 | 16.4625                                        |
| 0.093935791                                              | 0.036272198                                                 | 2.724137931                                    |
| 0.06825083                                               | 0.011785635                                                 | 16.24369748                                    |
| 0.064767536                                              | 0.018566979                                                 | 3.950819672                                    |
| 0.064563351                                              | 0.017834594                                                 | 28.08505747                                    |
| 0.073777778                                              | 0.015822635                                                 | 5.533333333                                    |
| 0.081442114                                              | 0.013625841                                                 | 19.22033898                                    |
| 0.074066597                                              | 0.016503858                                                 | 28.07124011                                    |
| 0.068221624                                              | 0.014864315                                                 | 10.4379085                                     |
| 0.08851287                                               | 0.012672178                                                 | 32.83827493                                    |
| 0.101027665                                              | 0.04555146                                                  | 43.54292343                                    |
| 0.068714086                                              | 0.008382962                                                 | 57.44497608                                    |
| 0.061923999                                              | 0.017330664                                                 | 11.02247191                                    |
| 0.087957623                                              | 0.01520727                                                  | 13.45751634                                    |
| 0.071273044                                              | 0.019053971                                                 | 5.915662651                                    |
| 0.078861174                                              | 0.060085643                                                 | 14.9047619                                     |
| 0.07560453                                               | 0.010393652                                                 | 22.45454545                                    |
| 0.06136837                                               | 0.013235057                                                 | 4.848101266                                    |
| 0.063656854                                              | 0.010875811                                                 | 15.40495868                                    |
| 0.06651288                                               | 0.008585562                                                 | 33.92156863                                    |
| 0.12244898                                               | 0.118280959                                                 | 1.714285714                                    |
| 0.082885355                                              | 0.016750254                                                 | 31.16489362                                    |
| 0.092275128                                              | 0.012370013                                                 | 42.26200873                                    |
| 0.07426027                                               | 0.025280775                                                 | 8.762711864                                    |
| 0.056132623                                              | 0.008832463                                                 | 15.54873646                                    |
| 0.113573407                                              | 0.082300985                                                 | 2.157894737                                    |
| 0.123966942                                              | 0.06355843                                                  | 1.363636364                                    |
| 0.063480864                                              | 0.008542545                                                 | 29.07423581                                    |
| 0.067247985                                              | 0.031256627                                                 | 5.850574713                                    |
| 0.086933333                                              | 0.060514079                                                 | 6.52                                           |
| 0.077231262                                              | 0.025805267                                                 | 24.09615385                                    |
| 0.074122804                                              | 0.018360757                                                 | 28.38903394                                    |
| 0.053254438                                              | 0.035058462                                                 | 2.076923077                                    |
| 0.058217532                                              | 0.0076411                                                   | 12.16746411                                    |
| 0.140495868                                              | 0.158275742                                                 | 1.545454545                                    |
| 0.060622222                                              | 0.028771119                                                 | 4.546666667                                    |
| 0.058364839                                              | 0.058480808                                                 | 5.369565217                                    |

| log.sigma.5.0.mm.3D_gldzm_HighIntensityLargeDistanceEmphasis | log.sigma.5.0.mm.3D_gldzm_SmallDistanceEmphasis | log.sigma.5.0.mm.3D_glcm_SumVariance | log.sigma.5.0.mm.3D_glcm_Homogeneity1 |
|--------------------------------------------------------------|-------------------------------------------------|--------------------------------------|---------------------------------------|
| 175.087386                                                   | 0.985436893                                     | 299.3295045                          | 0.389394478                           |
| 140.1785714                                                  | 0.994642857                                     | 265.0843107                          | 0.514123154                           |
| 102.5967742                                                  | 1                                               | 134.911472                           | 0.387675091                           |
| 286.786385                                                   | 0.970738785                                     | 468.6256856                          | 0.425634382                           |
| 237.0833333                                                  | 0.9875                                          | 457.5963756                          | 0.280473505                           |
| 110.2987013                                                  | 0.99025974                                      | 124.375461                           | 0.37556889                            |
| 48.71428571                                                  | 1                                               | 37.16356238                          | 0.449391298                           |
| 188.7653631                                                  | 0.987430168                                     | 234.997368                           | 0.332217707                           |
| 1615.362799                                                  | 0.723258134                                     | 1498.232374                          | 0.311004648                           |
| 170.8544061                                                  | 0.997126437                                     | 286.4341234                          | 0.521362549                           |
| 118.195122                                                   | 0.981707317                                     | 110.4405795                          | 0.390207038                           |
| 135.75625                                                    | 0.9953125                                       | 225.0127218                          | 0.437840238                           |
| 135.2601626                                                  | 0.965136631                                     | 89.50447832                          | 0.4652227                             |
| 188.8947368                                                  | 0.99122807                                      | 257.2161765                          | 0.375434843                           |
| 180.9856115                                                  | 0.973021583                                     | 265.2150197                          | 0.362772041                           |
| 241.6987952                                                  | 0.985207497                                     | 678.8020319                          | 0.754577612                           |
| 168.1470588                                                  | 0.992647059                                     | 244.748312                           | 0.323060051                           |
| 156.0559211                                                  | 0.984740497                                     | 162.9117633                          | 0.457999949                           |
| 257.2765957                                                  | 0.968085106                                     | 439.5769829                          | 0.278469215                           |
| 102.3879781                                                  | 0.983606557                                     | 197.2264401                          | 0.559720509                           |
| 136.023569                                                   | 0.988800037                                     | 288.1770365                          | 0.62864554                            |
| 170.2342342                                                  | 0.983108108                                     | 203.8408939                          | 0.425880089                           |
| 198.3865546                                                  | 0.996848739                                     | 491.1791043                          | 0.590305945                           |
| 155.4782609                                                  | 1                                               | 398.3650722                          | 0.330114926                           |
| 98.60330579                                                  | 1                                               | 174.7180118                          | 0.55977839                            |
| 135.5185185                                                  | 0.986111111                                     | 195.7215922                          | 0.3885079                             |
| 144.71875                                                    | 0.9921875                                       | 260.9918231                          | 0.588340661                           |
| 133.3833992                                                  | 0.997035573                                     | 387.4159832                          | 0.65535649                            |
| 221.1686461                                                  | 0.985088414                                     | 551.7975088                          | 0.565654877                           |
| 138.0685714                                                  | 0.974285714                                     | 354.2792922                          | 0.526747654                           |
| 149.6961538                                                  | 0.993509615                                     | 293.727205                           | 0.610008213                           |
| 220.0344288                                                  | 0.985698139                                     | 440.242528                           | 0.648719738                           |
| 177.434629                                                   | 0.978798587                                     | 259.6492304                          | 0.422859291                           |
| 56.1                                                         | 1                                               | 151.665493                           | 0.332208532                           |
| 150.6363636                                                  | 1                                               | 260.569118                           | 0.327412406                           |
| 204.65                                                       | 0.962986111                                     | 235.3845897                          | 0.414334562                           |
| 146.244898                                                   | 0.983630952                                     | 373.801482                           | 0.658918958                           |
| 149.1883562                                                  | 0.991818874                                     | 237.9712385                          | 0.536629418                           |
| 251.5                                                        | 0.963114754                                     | 473.0644981                          | 0.338996866                           |
| 128.0692308                                                  | 0.988461538                                     | 199.5893162                          | 0.410468317                           |
| 192.6330935                                                  | 0.98381295                                      | 414.2226609                          | 0.469552117                           |
| 166.8051948                                                  | 0.975649351                                     | 180.5388019                          | 0.36436201                            |
| 137.7193676                                                  | 0.985177866                                     | 150.1344879                          | 0.400267303                           |
| 165.9318182                                                  | 0.982954545                                     | 192.3860128                          | 0.353177853                           |
| 208.1646586                                                  | 0.957831325                                     | 265.8574312                          | 0.422504271                           |
| 71.89102564                                                  | 0.995192308                                     | 226.3633346                          | 0.736374532                           |
| 723.1372213                                                  | 0.851867734                                     | 411.3138333                          | 0.410929088                           |
| 138.8809524                                                  | 0.982142857                                     | 152.3037138                          | 0.35481247                            |
| 51.64285714                                                  | 1                                               | 84.16735278                          | 0.312200965                           |
| 340                                                          | 0.964705882                                     | 676.5643429                          | 0.256658753                           |
| 171.7934426                                                  | 0.994626594                                     | 371.0879096                          | 0.602459555                           |
| 119.416                                                      | 0.968888889                                     | 111.1768602                          | 0.417327923                           |
| 188.0240964                                                  | 0.956760375                                     | 333.0366248                          | 0.481619932                           |
| 137.1690141                                                  | 0.98943662                                      | 216.4580349                          | 0.385588216                           |
| 133.9186691                                                  | 0.990039022                                     | 353.6637784                          | 0.697171351                           |
| 213.1466667                                                  | 0.975                                           | 332.3319383                          | 0.319057899                           |
| 173.0401146                                                  | 0.987106017                                     | 260.1695096                          | 0.36483809                            |
| 381.0128755                                                  | 0.948497854                                     | 806.5350243                          | 0.290098768                           |
| 148.5943396                                                  | 0.985849057                                     | 207.1734169                          | 0.405834757                           |
| 113.3564356                                                  | 0.977722772                                     | 161.3025026                          | 0.441585243                           |
| 140.1593625                                                  | 0.957613988                                     | 137.9856289                          | 0.450531982                           |
| 339.7110583                                                  | 0.962775796                                     | 714.0674207                          | 0.544532796                           |
| 90.56293706                                                  | 0.997377622                                     | 167.992428                           | 0.602490807                           |
| 78.34375                                                     | 1                                               | 144.0456989                          | 0.563111014                           |
| 82.48275862                                                  | 0.974137931                                     | 132.0112307                          | 0.332765483                           |
| 182.092437                                                   | 0.981092437                                     | 292.1663403                          | 0.426103692                           |
| 191                                                          | 0.987704918                                     | 271.166984                           | 0.28421255                            |
| 179.9724138                                                  | 0.950893997                                     | 304.4000687                          | 0.503500763                           |
| 161.52                                                       | 0.98                                            | 239.8704977                          | 0.303898702                           |
| 148.5762712                                                  | 0.983521657                                     | 273.9895108                          | 0.499482699                           |
| 154.3139842                                                  | 0.983802404                                     | 264.3982095                          | 0.488429385                           |
| 165.124183                                                   | 0.985294118                                     | 196.0647181                          | 0.410464399                           |
| 144.2614555                                                  | 0.989892183                                     | 346.5790844                          | 0.624565012                           |
| 74.20649652                                                  | 0.994457334                                     | 189.4821594                          | 0.68176524                            |
| 216.3086124                                                  | 0.979930888                                     | 458.7994167                          | 0.68772152                            |
| 193.8820225                                                  | 0.983146067                                     | 293.141625                           | 0.32954491                            |
| 126.3071895                                                  | 0.980392157                                     | 137.0829347                          | 0.39345225                            |
| 136.6626506                                                  | 0.990963855                                     | 139.4642039                          | 0.36391467                            |
| 91.47089947                                                  | 1                                               | 92.16521993                          | 0.453520958                           |
| 253.3535354                                                  | 0.98989899                                      | 610.817273                           | 0.553159975                           |
| 195.4683544                                                  | 0.990506329                                     | 327.3166865                          | 0.298800426                           |
| 211.9876033                                                  | 0.981404959                                     | 335.2094296                          | 0.416189235                           |
| 236.1980392                                                  | 0.961220044                                     | 513.0400726                          | 0.557315067                           |
| 41.71428571                                                  | 1                                               | 72.79729904                          | 0.410594157                           |
| 153.1223404                                                  | 0.990964096                                     | 264.0607727                          | 0.597753925                           |
| 131.6200873                                                  | 0.985262009                                     | 181.4086382                          | 0.515067436                           |
| 136.559322                                                   | 0.993644068                                     | 143.2432273                          | 0.395493075                           |
| 336.6353791                                                  | 0.986462094                                     | 655.8115775                          | 0.304647999                           |
| 57.73684211                                                  | 1                                               | 100.1099491                          | 0.430741114                           |
| 34.27272727                                                  | 0.863636364                                     | 48.81453824                          | 0.365740741                           |
| 273.7751092                                                  | 0.971858321                                     | 663.0712364                          | 0.528877156                           |
| 125.1264368                                                  | 1                                               | 119.0262316                          | 0.382298426                           |
| 73.2                                                         | 0.99                                            | 77.60707752                          | 0.467778637                           |
| 131.0128205                                                  | 0.979723113                                     | 257.4475523                          | 0.548498871                           |
| 140.2793734                                                  | 0.985802872                                     | 286.8836397                          | 0.635853914                           |
| 235.7179487                                                  | 1                                               | 608.4780654                          | 0.276513882                           |
| 248.7320574                                                  | 0.942583732                                     | 367.6533326                          | 0.368366121                           |
| 23.09090909                                                  | 1                                               | 25.43737423                          | 0.423015052                           |
| 170.5066667                                                  | 1                                               | 340.4890597                          | 0.350524433                           |
| 120.5978261                                                  | 1                                               | 271.572411                           | 0.43309675                            |

| log.sigma.5.0.mm.3D_glc_m_Homogeneity2 | log.sigma.5.0.mm.3D_glc_m_ClusterShade | log.sigma.5.0.mm.3D_glc_m_MaximumProbability | log.sigma.5.0.mm.3D_glc_m_Idmn | log.sigma.5.0.mm.3D_glc_m_SumVariance2 |
|----------------------------------------|----------------------------------------|----------------------------------------------|--------------------------------|----------------------------------------|
| 0.302538889                            | 20.61776065                            | 0.02294983                                   | 0.978794429                    | 77.92436684                            |
| 0.455864273                            | -79.70597285                           | 0.04151828                                   | 0.98638312                     | 37.06484126                            |
| 0.298859599                            | 44.42064947                            | 0.036779429                                  | 0.963884049                    | 29.77325983                            |
| 0.349122524                            | 52.84980178                            | 0.021368054                                  | 0.986935962                    | 57.71906416                            |
| 0.18215348                             | 623.1822541                            | 0.028668138                                  | 0.960654089                    | 130.2530581                            |
| 0.284326158                            | 35.09133646                            | 0.025119771                                  | 0.957506083                    | 34.80488644                            |
| 0.375311786                            | 70.85200889                            | 0.094803731                                  | 0.954552652                    | 15.46204011                            |
| 0.241389569                            | 463.7439672                            | 0.017809604                                  | 0.974693568                    | 77.87065228                            |
| 0.221260995                            | 2769.343761                            | 0.008636907                                  | 0.98102251                     | 316.3482346                            |
| 0.464671021                            | -19.81091084                           | 0.038495275                                  | 0.99029551                     | 31.6856638                             |
| 0.30570269                             | 105.3299162                            | 0.055813123                                  | 0.965804541                    | 39.08512815                            |
| 0.362135025                            | 40.549069                              | 0.026601408                                  | 0.984661636                    | 45.91979057                            |
| 0.396882317                            | 253.9561429                            | 0.043236833                                  | 0.984654778                    | 35.50044499                            |
| 0.289116573                            | 203.2431196                            | 0.022244725                                  | 0.975827867                    | 60.82309875                            |
| 0.272721584                            | 106.7854073                            | 0.023875405                                  | 0.975641867                    | 53.86508478                            |
| 0.738409148                            | -142.0159088                           | 0.251288201                                  | 0.997547848                    | 17.95883493                            |
| 0.2247771                              | 112.9264242                            | 0.023098052                                  | 0.96383824                     | 62.35947431                            |
| 0.388086829                            | 70.46914181                            | 0.033822943                                  | 0.987271746                    | 35.5257546                             |
| 0.182034018                            | 224.6361099                            | 0.018030925                                  | 0.958527104                    | 108.6020714                            |
| 0.511279239                            | -39.73343502                           | 0.060544787                                  | 0.989019375                    | 34.21284338                            |
| 0.594106841                            | 50.75367143                            | 0.134434204                                  | 0.994641825                    | 20.91653307                            |
| 0.347979881                            | 280.8082313                            | 0.033142415                                  | 0.979947749                    | 54.63798684                            |
| 0.54991326                             | -96.1359541                            | 0.081849177                                  | 0.994432428                    | 25.9204272                             |
| 0.234008763                            | 2.429937091                            | 0.028894633                                  | 0.966065638                    | 104.9392956                            |
| 0.514218823                            | -56.09622439                           | 0.059203275                                  | 0.98847062                     | 24.02543974                            |
| 0.300660962                            | 3.381581151                            | 0.028800786                                  | 0.968649485                    | 37.44644686                            |
| 0.546591618                            | -40.51596803                           | 0.104960548                                  | 0.992978101                    | 19.12085904                            |
| 0.621018908                            | -164.8014592                           | 0.236209629                                  | 0.996610851                    | 31.16136212                            |
| 0.514078327                            | -187.9643769                           | 0.160667893                                  | 0.993740869                    | 44.56245595                            |
| 0.470849092                            | -122.5388347                           | 0.052854884                                  | 0.990342248                    | 48.50354824                            |
| 0.570781116                            | -78.02119796                           | 0.132464985                                  | 0.993924117                    | 26.49550351                            |
| 0.615471616                            | -88.32868701                           | 0.206513581                                  | 0.996041477                    | 22.97723503                            |
| 0.343385031                            | 101.5075013                            | 0.017963703                                  | 0.984113093                    | 54.20433592                            |
| 0.235772751                            | -2.791031072                           | 0.163141026                                  | 0.902353902                    | 30.28396902                            |
| 0.229916894                            | 66.87583144                            | 0.029182036                                  | 0.963019952                    | 51.92961994                            |
| 0.333939643                            | 78.29134922                            | 0.026896763                                  | 0.98124649                     | 34.41742015                            |
| 0.626033503                            | -164.9293844                           | 0.184878236                                  | 0.994695664                    | 29.17320701                            |
| 0.482769814                            | -22.83886851                           | 0.059964624                                  | 0.990726944                    | 41.08472148                            |
| 0.245833763                            | 65.95234091                            | 0.016892242                                  | 0.973728272                    | 100.024075                             |
| 0.328381211                            | 136.5331544                            | 0.024655289                                  | 0.973722799                    | 55.75318897                            |
| 0.400189549                            | -69.50689439                           | 0.037121319                                  | 0.988987919                    | 44.43101187                            |
| 0.278028875                            | 525.6943966                            | 0.045092022                                  | 0.972771902                    | 65.81669311                            |
| 0.318115164                            | 89.86070591                            | 0.030206978                                  | 0.977077162                    | 31.46334646                            |
| 0.265636868                            | 479.1447989                            | 0.025299842                                  | 0.975511672                    | 77.71413005                            |
| 0.343841858                            | 425.0038702                            | 0.033970818                                  | 0.984551532                    | 60.20248675                            |
| 0.718947546                            | -70.94256071                           | 0.23310921                                   | 0.99435094                     | 16.13911061                            |
| 0.330565591                            | 522.2922181                            | 0.019179994                                  | 0.990903668                    | 70.76022007                            |
| 0.263790695                            | 116.1988621                            | 0.028724588                                  | 0.96208491                     | 47.6610496                             |
| 0.203229333                            | 21.46887327                            | 0.116519592                                  | 0.913020943                    | 17.5454484                             |
| 0.161573224                            | 277.9182771                            | 0.019150844                                  | 0.962599282                    | 131.6269371                            |
| 0.560755274                            | -91.13887472                           | 0.158177446                                  | 0.993484524                    | 30.41305423                            |
| 0.33812873                             | 103.5883992                            | 0.051817535                                  | 0.970394476                    | 25.95801173                            |
| 0.415264652                            | -56.65767882                           | 0.034583197                                  | 0.990193331                    | 40.05804871                            |
| 0.298289002                            | -1.259043838                           | 0.02623323                                   | 0.971406022                    | 44.10240442                            |
| 0.670827258                            | -126.2721413                           | 0.239929618                                  | 0.995362519                    | 22.38692792                            |
| 0.223691018                            | 78.56989152                            | 0.01777682                                   | 0.965326853                    | 64.89362389                            |
| 0.275193683                            | 69.3748794                             | 0.019801936                                  | 0.980677043                    | 42.58701047                            |
| 0.19454376                             | -402.7038803                           | 0.015399457                                  | 0.972585984                    | 121.1174414                            |
| 0.32068148                             | 134.0934904                            | 0.029400793                                  | 0.980435393                    | 52.13993105                            |
| 0.361942298                            | 30.02722915                            | 0.027938487                                  | 0.980212838                    | 46.04646953                            |
| 0.376938649                            | 102.3114821                            | 0.035883368                                  | 0.982347974                    | 29.42991686                            |
| 0.491401285                            | -135.1918839                           | 0.098308652                                  | 0.994598154                    | 50.77816744                            |
| 0.563676548                            | -57.07152198                           | 0.093466777                                  | 0.993218265                    | 22.98037867                            |
| 0.514096196                            | -8.03836198                            | 0.068425898                                  | 0.983401047                    | 21.25853081                            |
| 0.235045556                            | 40.67554328                            | 0.042306728                                  | 0.952492433                    | 25.57196724                            |
| 0.349171783                            | -54.58716873                           | 0.021186778                                  | 0.984532051                    | 43.57200412                            |
| 0.185106151                            | 89.90078496                            | 0.025729443                                  | 0.952805468                    | 62.83955445                            |
| 0.441726502                            | -73.37099865                           | 0.062142494                                  | 0.988933865                    | 57.66730871                            |
| 0.20736291                             | 56.27025244                            | 0.023415853                                  | 0.953111501                    | 53.72957812                            |
| 0.43751406                             | -24.24089955                           | 0.02980538                                   | 0.986950544                    | 34.99829868                            |
| 0.424676923                            | -28.4130847                            | 0.034327829                                  | 0.986894723                    | 34.58244152                            |
| 0.330452879                            | 208.9913871                            | 0.02514922                                   | 0.980404878                    | 42.05247872                            |
| 0.587099324                            | -117.3088171                           | 0.128728256                                  | 0.993329798                    | 30.35457503                            |
| 0.653523637                            | -96.6460046                            | 0.185398439                                  | 0.9936249                      | 25.04990269                            |
| 0.65955579                             | -117.6552851                           | 0.250236078                                  | 0.996225834                    | 24.22148559                            |
| 0.23673665                             | 113.3921781                            | 0.014884598                                  | 0.966349774                    | 65.26219701                            |
| 0.308095377                            | 87.01271707                            | 0.030590631                                  | 0.97316945                     | 31.99663436                            |
| 0.276368424                            | 199.5785771                            | 0.032853834                                  | 0.96656591                     | 47.68330872                            |
| 0.382230753                            | 48.05834223                            | 0.030904997                                  | 0.97399387                     | 23.64815937                            |
| 0.50121079                             | -62.19688641                           | 0.095174406                                  | 0.992919877                    | 31.2679275                             |
| 0.204307079                            | 110.2826433                            | 0.026950807                                  | 0.949970247                    | 54.20364102                            |
| 0.336686387                            | 71.58685535                            | 0.028769428                                  | 0.984871919                    | 50.44221928                            |
| 0.507698507                            | -145.8015684                           | 0.087154748                                  | 0.993570767                    | 36.19667187                            |
| 0.324758333                            | 7.759804701                            | 0.094366211                                  | 0.938059299                    | 13.26059583                            |
| 0.557216298                            | -57.62678127                           | 0.12139644                                   | 0.991914364                    | 22.25587116                            |
| 0.457339055                            | 33.24908465                            | 0.040749735                                  | 0.986440985                    | 21.34548771                            |
| 0.312408091                            | 262.0555366                            | 0.028297637                                  | 0.977962526                    | 46.98256317                            |
| 0.209872008                            | 146.5762831                            | 0.014493612                                  | 0.975665994                    | 76.76975944                            |
| 0.353063207                            | 23.25017292                            | 0.088720551                                  | 0.946239917                    | 12.53372523                            |
| 0.27791731                             | 43.50509504                            | 0.113095238                                  | 0.918049499                    | 13.51713278                            |
| 0.47134636                             | -206.6491722                           | 0.078364913                                  | 0.993763903                    | 53.38538543                            |
| 0.296302643                            | 425.5476551                            | 0.037504053                                  | 0.974479697                    | 54.26111129                            |
| 0.397750441                            | 40.01728388                            | 0.034455294                                  | 0.974800602                    | 24.69801253                            |
| 0.498138886                            | -33.14772641                           | 0.055318959                                  | 0.989306861                    | 37.50004599                            |
| 0.599081514                            | -89.60496365                           | 0.181803856                                  | 0.993970106                    | 30.05701126                            |
| 0.175962628                            | -135.1486443                           | 0.036772662                                  | 0.959779287                    | 64.05854636                            |
| 0.280688831                            | 77.04510866                            | 0.01858908                                   | 0.978777713                    | 70.08954281                            |
| 0.342300403                            | 18.31240371                            | 0.12801344                                   | 0.909037357                    | 8.047915738                            |
| 0.256870611                            | 355.3360036                            | 0.029326706                                  | 0.970792723                    | 83.32453577                            |
| 0.356337981                            | -60.5457787                            | 0.03751428                                   | 0.980892034                    | 53.70205214                            |

| log.sigma.5.0.mm.3D_glc_m_Contrast | log.sigma.5.0.mm.3D_glc_m_DifferenceEntropy | log.sigma.5.0.mm.3D_glc_m_InverseVariance | log.sigma.5.0.mm.3D_glc_m_Entropy | log.sigma.5.0.mm.3D_glc_m_Dissimilarity |
|------------------------------------|---------------------------------------------|-------------------------------------------|-----------------------------------|-----------------------------------------|
| 12.01561054                        | 2.847991787                                 | 0.306022891                               | 7.3435813                         | 2.702180398                             |
| 5.217044691                        | 2.371595905                                 | 0.414691385                               | 6.548788051                       | 1.658436945                             |
| 10.16307488                        | 2.648879421                                 | 0.310654201                               | 6.310654201                       | 2.578198368                             |
| 10.77857922                        | 2.83588144                                  | 0.346545362                               | 7.484635977                       | 2.445886734                             |
| 31.90527466                        | 3.311196657                                 | 0.180555732                               | 6.513649415                       | 4.577233311                             |
| 12.19473158                        | 2.864190065                                 | 0.282413638                               | 6.753831971                       | 2.803141166                             |
| 7.765974268                        | 2.318239643                                 | 0.370002416                               | 4.707985479                       | 2.101207946                             |
| 21.4830809                         | 3.251932183                                 | 0.260215255                               | 7.523807176                       | 3.629341587                             |
| 34.10323924                        | 3.594527579                                 | 0.224636036                               | 9.004199183                       | 4.432681966                             |
| 4.457658799                        | 2.292881815                                 | 0.428875696                               | 6.504288646                       | 1.555372295                             |
| 13.63639972                        | 2.974814319                                 | 0.287463432                               | 6.836560552                       | 2.873663781                             |
| 8.623552557                        | 2.647931023                                 | 0.364540325                               | 6.978518348                       | 2.214065113                             |
| 7.955175613                        | 2.628951745                                 | 0.383812185                               | 6.598775177                       | 2.057826447                             |
| 13.74340778                        | 2.954853669                                 | 0.30435185                                | 7.347118406                       | 2.907605494                             |
| 15.11536773                        | 3.01721336                                  | 0.279539742                               | 7.251615698                       | 3.066151669                             |
| 1.584063363                        | 1.568572452                                 | 0.339638695                               | 4.478708752                       | 0.667178712                             |
| 19.17471502                        | 3.074215256                                 | 0.219517433                               | 6.987158518                       | 3.580660145                             |
| 8.406714452                        | 2.678845612                                 | 0.375940376                               | 6.891438156                       | 2.127033233                             |
| 33.55673249                        | 3.464578572                                 | 0.174223562                               | 7.251363819                       | 4.730237338                             |
| 3.319999863                        | 2.113523212                                 | 0.44152314                                | 6.186405618                       | 1.329353843                             |
| 2.200016645                        | 1.896479998                                 | 0.43787267                                | 5.48132478                        | 1.024863336                             |
| 10.42749635                        | 2.801266514                                 | 0.333226218                               | 7.114893096                       | 2.440118951                             |
| 3.035621999                        | 2.04979784                                  | 0.450594363                               | 5.887030523                       | 1.209707201                             |
| 19.73020695                        | 2.991329187                                 | 0.227918504                               | 6.530806655                       | 3.565187014                             |
| 3.532360493                        | 2.115334091                                 | 0.460792773                               | 5.940035893                       | 1.338611926                             |
| 11.21260156                        | 2.814482115                                 | 0.31077821                                | 6.793456473                       | 2.638475112                             |
| 3.222620578                        | 2.091339763                                 | 0.440053597                               | 5.798492389                       | 1.237918297                             |
| 2.538498019                        | 1.940666602                                 | 0.378430803                               | 5.356956735                       | 1.011550331                             |
| 5.458460406                        | 2.391811575                                 | 0.362923519                               | 6.262208659                       | 1.551878772                             |
| 4.434530037                        | 2.295660035                                 | 0.423990895                               | 6.571913046                       | 1.542564761                             |
| 2.76932102                         | 2.021861236                                 | 0.425659043                               | 5.767296791                       | 1.140142167                             |
| 3.207486611                        | 2.036837038                                 | 0.385829527                               | 5.483402536                       | 1.094140858                             |
| 9.704548871                        | 2.771996936                                 | 0.342867416                               | 7.337524917                       | 2.371014781                             |
| 17.86987179                        | 1.816830447                                 | 0.228999201                               | 3.141025559                       | 3.462179487                             |
| 18.07298235                        | 3.001601892                                 | 0.240788498                               | 6.409439875                       | 3.444755661                             |
| 10.60855539                        | 2.835944623                                 | 0.335733193                               | 7.070856168                       | 2.482083712                             |
| 2.664610504                        | 1.965715774                                 | 0.377655705                               | 5.329070184                       | 1.020912276                             |
| 4.252797277                        | 2.274002411                                 | 0.423961167                               | 6.512379106                       | 1.497518237                             |
| 19.20743621                        | 3.124094337                                 | 0.248146672                               | 7.506869048                       | 3.468079906                             |
| 10.36607582                        | 2.796185708                                 | 0.329857266                               | 7.090187887                       | 2.485499073                             |
| 6.630067003                        | 2.504418192                                 | 0.388503476                               | 6.759668778                       | 1.929441468                             |
| 18.64904615                        | 3.162348771                                 | 0.270999921                               | 7.122964794                       | 3.307925152                             |
| 11.94082966                        | 2.873532632                                 | 0.322011564                               | 6.946705323                       | 2.660384917                             |
| 19.30902016                        | 3.190099066                                 | 0.272035255                               | 7.389925005                       | 3.399901253                             |
| 10.18215108                        | 2.806230019                                 | 0.336977966                               | 7.299162909                       | 2.429621822                             |
| 1.145389679                        | 1.517844924                                 | 0.376471691                               | 4.383482083                       | 0.655242376                             |
| 12.2761431                         | 2.92085105                                  | 0.328260943                               | 7.597735549                       | 2.601716722                             |
| 16.8304875                         | 3.072133794                                 | 0.255379126                               | 6.899287179                       | 3.263252651                             |
| 15.81909202                        | 1.939862672                                 | 0.220833184                               | 3.794511884                       | 3.294272394                             |
| 42.08512877                        | 3.572164753                                 | 0.16325325                                | 7.040254787                       | 5.31075737                              |
| 3.268376617                        | 2.110660749                                 | 0.409336929                               | 5.869030351                       | 1.221571286                             |
| 11.819475                          | 2.893931492                                 | 0.317770567                               | 6.49836808                        | 2.591905052                             |
| 6.374236101                        | 2.508844721                                 | 0.390514237                               | 6.829149885                       | 1.876909732                             |
| 11.18539599                        | 2.804123697                                 | 0.313780887                               | 6.792199628                       | 2.662968568                             |
| 2.121752789                        | 1.818102995                                 | 0.363308183                               | 4.95188772                        | 0.868948755                             |
| 21.97186498                        | 3.244888267                                 | 0.228506268                               | 7.499125944                       | 3.764892888                             |
| 14.95544452                        | 3.00159924                                  | 0.283137015                               | 7.324051996                       | 3.040483464                             |
| 30.2307963                         | 3.417723923                                 | 0.20474883                                | 7.995265784                       | 4.418091835                             |
| 10.09799156                        | 2.737796326                                 | 0.319619418                               | 6.943850676                       | 2.479112141                             |
| 6.789922339                        | 2.483767948                                 | 0.351146061                               | 6.743260307                       | 2.062222736                             |
| 7.568854789                        | 2.622572811                                 | 0.373922471                               | 6.687153202                       | 2.080208279                             |
| 6.450770805                        | 2.494691427                                 | 0.376631754                               | 6.71546184                        | 1.690832662                             |
| 2.809209508                        | 1.994176631                                 | 0.4424484                                 | 5.751003428                       | 1.159410791                             |
| 3.493389781                        | 2.14265988                                  | 0.426242794                               | 5.86448174                        | 1.344362689                             |
| 15.46985343                        | 2.779355387                                 | 0.25452194                                | 5.412302331                       | 3.241093672                             |
| 9.424500651                        | 2.72585517                                  | 0.359330916                               | 7.136934817                       | 2.33445604                              |
| 28.07784495                        | 3.291963892                                 | 0.190754951                               | 6.453720944                       | 4.351127123                             |
| 6.719160312                        | 2.55353631                                  | 0.37979317                                | 6.894764534                       | 1.843591116                             |
| 23.09113868                        | 3.231271143                                 | 0.2159267                                 | 6.785411534                       | 3.956757986                             |
| 5.512991453                        | 2.415261787                                 | 0.408514797                               | 6.647294827                       | 1.730843973                             |
| 6.757406762                        | 2.52137473                                  | 0.397368704                               | 6.780039565                       | 1.872155945                             |
| 12.16996611                        | 2.904835408                                 | 0.327363856                               | 7.051952882                       | 2.614498533                             |
| 2.772957519                        | 2.022238656                                 | 0.409344838                               | 5.611763186                       | 1.109833459                             |
| 1.91199646                         | 1.81312075                                  | 0.384469686                               | 5.198691122                       | 0.879386374                             |
| 2.853918954                        | 1.932723767                                 | 0.354321139                               | 5.140422573                       | 0.967047967                             |
| 21.3927661                         | 3.202670669                                 | 0.245570451                               | 7.578082025                       | 3.655495216                             |
| 11.62873135                        | 2.843862832                                 | 0.309916157                               | 6.719716116                       | 2.671508997                             |
| 16.32807081                        | 3.062617294                                 | 0.281201004                               | 6.718971429                       | 3.158147708                             |
| 8.276903855                        | 2.667112872                                 | 0.37063355                                | 6.542150012                       | 2.146035957                             |
| 4.588623962                        | 2.315302535                                 | 0.400706072                               | 6.207965871                       | 1.490549052                             |
| 27.67313552                        | 3.295027458                                 | 0.213185769                               | 6.699769041                       | 4.23829156                              |
| 10.80299814                        | 2.842449985                                 | 0.337442638                               | 7.293608803                       | 2.489263722                             |
| 5.239038734                        | 2.351990405                                 | 0.400454898                               | 6.332980016                       | 1.534734291                             |
| 8.935252354                        | 2.307856156                                 | 0.318007951                               | 4.277046532                       | 2.379496145                             |
| 3.398947531                        | 2.113615688                                 | 0.426940485                               | 5.807908792                       | 1.235412642                             |
| 5.188533932                        | 2.374580355                                 | 0.417055944                               | 6.298109086                       | 1.652939224                             |
| 12.60684952                        | 2.915000393                                 | 0.318461791                               | 6.897834414                       | 2.717192383                             |
| 26.60821969                        | 3.404172477                                 | 0.211819391                               | 7.884789475                       | 4.14352176                              |
| 9.029416951                        | 2.384172094                                 | 0.33584564                                | 4.71090639                        | 2.334973082                             |
| 10.3015873                         | 2.020660448                                 | 0.369435019                               | 3.782290755                       | 2.603174603                             |
| 6.186624466                        | 2.49633473                                  | 0.373375427                               | 6.712390119                       | 1.724212341                             |
| 14.81029598                        | 2.991063006                                 | 0.288407704                               | 6.681965705                       | 2.948037081                             |
| 6.199650103                        | 2.451906283                                 | 0.391911448                               | 6.291898051                       | 1.900381115                             |
| 4.076892857                        | 2.22973095                                  | 0.434677725                               | 6.442890231                       | 1.434214466                             |
| 27.60894673                        | 2.015987503                                 | 0.39244656                                | 5.668338212                       | 1.084784322                             |
| 27.57822781                        | 3.167079576                                 | 0.185999724                               | 5.823246303                       | 4.379346749                             |
| 15.32799806                        | 3.045014067                                 | 0.28971049                                | 7.60487357                        | 3.05031692                              |
| 7.579413962                        | 2.013148077                                 | 0.363896988                               | 3.778213004                       | 2.184594252                             |
| 15.26509185                        | 2.9572682                                   | 0.262833829                               | 6.693005461                       | 3.151730329                             |
| 9.929136917                        | 2.733622427                                 | 0.340618385                               | 6.715159511                       | 2.361921156                             |

| log.sigma.5.0.mm.3D_glcm_DifferenceVariance | log.sigma.5.0.mm.3D_glcm_ldn | log.sigma.5.0.mm.3D_glcm_ldm | log.sigma.5.0.mm.3D_glcm_Correlation | log.sigma.5.0.mm.3D_glcm_Autocorrelation |
|---------------------------------------------|------------------------------|------------------------------|--------------------------------------|------------------------------------------|
| 4.46813374                                  | 0.900821408                  | 0.302538889                  | 0.732706522                          | 115.3863047                              |
| 2.349185454                                 | 0.924589014                  | 0.455864273                  | 0.753461132                          | 104.5310519                              |
| 3.08969135                                  | 0.869615477                  | 0.298859599                  | 0.495192815                          | 57.63193675                              |
| 4.584557526                                 | 0.924064883                  | 0.349122524                  | 0.685597777                          | 170.5842708                              |
| 9.728085659                                 | 0.863915996                  | 0.18215348                   | 0.603809831                          | 156.0928336                              |
| 4.122810763                                 | 0.860837478                  | 0.284326158                  | 0.48290349                           | 53.9994001                               |
| 2.770648017                                 | 0.863738613                  | 0.375311786                  | 0.36628811                           | 17.9482893                               |
| 7.9392174                                   | 0.892109234                  | 0.241389569                  | 0.566089442                          | 90.60582877                              |
| 13.79813922                                 | 0.908277225                  | 0.221260995                  | 0.807262132                          | 478.0097174                              |
| 1.978392958                                 | 0.93451377                   | 0.464671021                  | 0.75190095                           | 111.5651774                              |
| 5.033866936                                 | 0.877834334                  | 0.30570269                   | 0.481595988                          | 48.25217222                              |
| 3.411605578                                 | 0.917093346                  | 0.362135025                  | 0.682149212                          | 90.87773319                              |
| 3.590753467                                 | 0.919788582                  | 0.396882317                  | 0.630847999                          | 41.39153254                              |
| 4.971291728                                 | 0.894358397                  | 0.289116573                  | 0.630907039                          | 100.9667058                              |
| 5.368609715                                 | 0.893204621                  | 0.272721584                  | 0.564598733                          | 103.1198666                              |
| 1.118200326                                 | 0.975519454                  | 0.738409148                  | 0.836969102                          | 218.4585659                              |
| 5.456214263                                 | 0.86804081                   | 0.2247771                    | 0.538137073                          | 93.98609463                              |
| 3.740056557                                 | 0.926044859                  | 0.388086829                  | 0.616590594                          | 69.55353306                              |
| 10.00503825                                 | 0.859989469                  | 0.182034018                  | 0.531373447                          | 153.8777046                              |
| 1.49153387                                  | 0.931471116                  | 0.511279239                  | 0.82286709                           | 82.0284706                               |
| 1.123259251                                 | 0.953579834                  | 0.594106841                  | 0.809115259                          | 108.8191958                              |
| 4.213682967                                 | 0.906393673                  | 0.347979881                  | 0.675678205                          | 83.29924402                              |
| 1.531746257                                 | 0.952397087                  | 0.54991326                   | 0.789770561                          | 172.660829                               |
| 5.957147194                                 | 0.873928666                  | 0.234008763                  | 0.689229524                          | 141.3720788                              |
| 1.673124221                                 | 0.931364495                  | 0.514218823                  | 0.743213209                          | 73.17730162                              |
| 4.049052336                                 | 0.880226418                  | 0.300660962                  | 0.53954429                           | 79.74187153                              |
| 1.647190209                                 | 0.947294891                  | 0.546591618                  | 0.711225413                          | 100.537634                               |
| 1.474377032                                 | 0.965607627                  | 0.621018908                  | 0.848733613                          | 138.7110533                              |
| 2.935764844                                 | 0.9520501                    | 0.514078327                  | 0.781465288                          | 191.7593509                              |
| 1.997856892                                 | 0.935080809                  | 0.470849092                  | 0.83191876                           | 134.0602363                              |
| 1.431436688                                 | 0.951141185                  | 0.570781116                  | 0.810016652                          | 111.6591698                              |
| 1.967018685                                 | 0.964470664                  | 0.615471616                  | 0.753325574                          | 154.2727299                              |
| 3.916158903                                 | 0.915033873                  | 0.343385031                  | 0.696132052                          | 103.162072                               |
| 2.747964744                                 | 0.794604069                  | 0.235772751                  | 0.290502913                          | 46.38653846                              |
| 5.738112526                                 | 0.867481317                  | 0.229916894                  | 0.482309913                          | 97.82146262                              |
| 4.280183107                                 | 0.908310349                  | 0.333939643                  | 0.52987246                           | 93.5826422                               |
| 1.58517915                                  | 0.958321954                  | 0.626033503                  | 0.832133629                          | 134.2672812                              |
| 1.947985476                                 | 0.936890923                  | 0.482769814                  | 0.811262021                          | 96.03033851                              |
| 6.443318578                                 | 0.889159905                  | 0.245833763                  | 0.677605467                          | 169.8508985                              |
| 3.938651826                                 | 0.891727665                  | 0.328381211                  | 0.685331297                          | 81.22048748                              |
| 2.759754113                                 | 0.929304034                  | 0.400189549                  | 0.739918859                          | 152.3127374                              |
| 7.148407092                                 | 0.890991817                  | 0.278028875                  | 0.561599392                          | 71.46599873                              |
| 4.51727765                                  | 0.898783344                  | 0.318115164                  | 0.445809113                          | 63.63025006                              |
| 7.284234418                                 | 0.895102337                  | 0.265636868                  | 0.602192499                          | 75.67961527                              |
| 4.088191634                                 | 0.916271287                  | 0.343841858                  | 0.710688511                          | 104.3440504                              |
| 0.689612419                                 | 0.958236703                  | 0.718947546                  | 0.865780817                          | 85.06268688                              |
| 5.302342175                                 | 0.935782525                  | 0.330565591                  | 0.706153612                          | 152.2749362                              |
| 5.760524613                                 | 0.869043149                  | 0.263790695                  | 0.477038805                          | 62.76164294                              |
| 4.437063974                                 | 0.799907501                  | 0.203229333                  | 0.062221756                          | 28.98909701                              |
| 12.72372397                                 | 0.865857335                  | 0.161573224                  | 0.515953287                          | 224.5223896                              |
| 1.728427256                                 | 0.950274768                  | 0.560755274                  | 0.805546255                          | 135.9782175                              |
| 4.86611388                                  | 0.888825355                  | 0.33812873                   | 0.37728114                           | 48.58594062                              |
| 2.724101467                                 | 0.933594944                  | 0.415264652                  | 0.725591404                          | 126.6335925                              |
| 3.850563752                                 | 0.884319804                  | 0.298289002                  | 0.5967832                            | 86.65472843                              |
| 1.33808311                                  | 0.9627582                    | 0.670827258                  | 0.826242462                          | 125.9171139                              |
| 7.23971106                                  | 0.872670593                  | 0.223691018                  | 0.496575562                          | 123.7358555                              |
| 5.105044283                                 | 0.904137889                  | 0.275193683                  | 0.491171228                          | 101.2770817                              |
| 9.596289485                                 | 0.885431621                  | 0.19454376                   | 0.602346736                          | 270.4635324                              |
| 3.708794245                                 | 0.904258045                  | 0.32068148                   | 0.674985557                          | 84.38245091                              |
| 2.34875411                                  | 0.902592231                  | 0.361942298                  | 0.741710494                          | 69.07098625                              |
| 3.161879946                                 | 0.911308057                  | 0.376938649                  | 0.590275225                          | 60.26257543                              |
| 3.502589472                                 | 0.955092695                  | 0.491401285                  | 0.774231459                          | 243.1596784                              |
| 1.383834911                                 | 0.94807355                   | 0.563676548                  | 0.781469136                          | 70.79898046                              |
| 1.604236276                                 | 0.91837121                   | 0.514096196                  | 0.717933803                          | 62.28889695                              |
| 4.679888337                                 | 0.849614206                  | 0.235045556                  | 0.250983171                          | 51.71125462                              |
| 3.76595481                                  | 0.916201942                  | 0.349171783                  | 0.645141401                          | 113.4206368                              |
| 8.425975902                                 | 0.850763729                  | 0.185106151                  | 0.37877501                           | 98.89339035                              |
| 3.235616116                                 | 0.932885402                  | 0.441726502                  | 0.790884004                          | 117.6572115                              |
| 7.063518834                                 | 0.851224881                  | 0.20736291                   | 0.403081587                          | 91.23025107                              |
| 2.430327835                                 | 0.924870558                  | 0.43751406                   | 0.727909881                          | 107.4169851                              |
| 3.098177635                                 | 0.926331473                  | 0.424676923                  | 0.673077512                          | 104.1009243                              |
| 5.119485542                                 | 0.907972171                  | 0.330452879                  | 0.549233245                          | 79.77306995                              |
| 1.508391926                                 | 0.950438704                  | 0.587099324                  | 0.832403472                          | 127.3234993                              |
| 1.119390653                                 | 0.953936531                  | 0.653523637                  | 0.857526625                          | 76.61218802                              |
| 1.896825002                                 | 0.967552245                  | 0.65955579                   | 0.788751681                          | 157.6897452                              |
| 7.003483123                                 | 0.876350253                  | 0.23673665                   | 0.511066615                          | 111.1503446                              |
| 4.129847873                                 | 0.889413526                  | 0.308095377                  | 0.466488656                          | 58.58563995                              |
| 5.977431423                                 | 0.878102676                  | 0.276368424                  | 0.495343573                          | 57.63320312                              |
| 3.508209359                                 | 0.896021454                  | 0.382230753                  | 0.475926208                          | 43.00439616                              |
| 2.307198447                                 | 0.946672504                  | 0.50121079                   | 0.743601214                          | 208.7260658                              |
| 8.851880143                                 | 0.849672115                  | 0.204307079                  | 0.327894274                          | 118.009569                               |
| 4.447067029                                 | 0.917433736                  | 0.336686387                  | 0.647630127                          | 127.3825287                              |
| 2.770647268                                 | 0.950896049                  | 0.507698507                  | 0.747463166                          | 180.5802763                              |
| 3.005621728                                 | 0.836251145                  | 0.324758333                  | 0.198465787                          | 29.58920012                              |
| 1.830526118                                 | 0.945361159                  | 0.557216298                  | 0.734713341                          | 101.653966                               |
| 2.338016474                                 | 0.924825551                  | 0.457339055                  | 0.610379622                          | 75.23370288                              |
| 5.016433599                                 | 0.900851768                  | 0.312408091                  | 0.577556363                          | 60.38719967                              |
| 8.952834649                                 | 0.891465318                  | 0.209872008                  | 0.486081745                          | 224.4734244                              |
| 2.774445192                                 | 0.850856078                  | 0.353063207                  | 0.181214365                          | 40.78358048                              |
| 3.316830436                                 | 0.809652775                  | 0.27791731                   | 0.142463757                          | 18.66666667                              |
| 3.116501282                                 | 0.949946875                  | 0.47134636                   | 0.79188031                           | 228.1242182                              |
| 5.649119736                                 | 0.893757509                  | 0.296302643                  | 0.567399021                          | 49.43506811                              |
| 2.429348486                                 | 0.894955014                  | 0.397750441                  | 0.598929744                          | 37.7272698                               |
| 1.950681702                                 | 0.933906216                  | 0.498138886                  | 0.803552902                          | 102.5965167                              |
| 1.5546631                                   | 0.953714638                  | 0.599081514                  | 0.831120886                          | 109.223219                               |
| 7.744354866                                 | 0.858985507                  | 0.175962628                  | 0.39070371                           | 198.3059694                              |
| 5.733205719                                 | 0.90098979                   | 0.280688831                  | 0.641313914                          | 137.6780389                              |
| 2.535514803                                 | 0.805195318                  | 0.342300403                  | 0.029440845                          | 11.04968237                              |
| 5.028606127                                 | 0.881738869                  | 0.256870611                  | 0.688824955                          | 125.3224675                              |
| 4.058391892                                 | 0.909140167                  | 0.356337981                  | 0.690362451                          | 105.8169631                              |

| log.sigma.5.0.mm.3D_glcm_SumEntropy | log.sigma.5.0.mm.3D_glcm_AverageIntensity | log.sigma.5.0.mm.3D_glcm_Energy | log.sigma.5.0.mm.3D_glcm_SumSquares | log.sigma.5.0.mm.3D_glcm_ClusterProminence |
|-------------------------------------|-------------------------------------------|---------------------------------|-------------------------------------|--------------------------------------------|
| 5.010845577                         | 9.944730928                               | 0.007496404                     | 22.48499435                         | 12776.39274                                |
| 4.553757308                         | 9.826795411                               | 0.015117153                     | 10.57047149                         | 3324.93772                                 |
| 4.269068749                         | 7.257398649                               | 0.01518174                      | 9.984083678                         | 2479.392496                                |
| 4.936123864                         | 12.61112716                               | 0.008042333                     | 17.25926215                         | 9958.625178                                |
| 4.844921639                         | 11.507645                                 | 0.012032715                     | 41.37070671                         | 38529.22243                                |
| 4.442016054                         | 6.951520809                               | 0.010862913                     | 11.7499045                          | 2809.193313                                |
| 3.352812285                         | 3.987755127                               | 0.046203174                     | 5.807003594                         | 1100.852238                                |
| 4.958584869                         | 8.749999211                               | 0.006670674                     | 24.96991678                         | 19386.08304                                |
| 5.992755588                         | 20.37727068                               | 0.002523069                     | 88.68399058                         | 236965.7087                                |
| 4.509602626                         | 10.23505446                               | 0.01576827                      | 9.03583065                          | 2729.710474                                |
| 4.497132472                         | 6.467697241                               | 0.012247377                     | 13.18038197                         | 3828.386565                                |
| 4.678903958                         | 9.030426188                               | 0.010302638                     | 13.63583578                         | 4791.222699                                |
| 4.399125693                         | 5.873065058                               | 0.015957959                     | 10.86390515                         | 5917.697014                                |
| 4.874638432                         | 9.443317709                               | 0.007848876                     | 18.64162663                         | 9526.345574                                |
| 4.793982875                         | 9.664581447                               | 0.008118384                     | 17.24511313                         | 8113.444704                                |
| 3.575554522                         | 14.64119609                               | 0.113929943                     | 4.885724573                         | 2408.382837                                |
| 4.736421484                         | 9.11444777                                | 0.009110928                     | 20.38354733                         | 9110.910537                                |
| 4.559085944                         | 7.922589799                               | 0.012370429                     | 10.98311726                         | 4521.933114                                |
| 5.055873335                         | 11.64644755                               | 0.007269512                     | 36.02379155                         | 27252.44848                                |
| 4.472519575                         | 8.619923205                               | 0.019519942                     | 9.38321081                          | 2379.378692                                |
| 4.061845737                         | 10.20483386                               | 0.039007589                     | 5.779137428                         | 1221.068903                                |
| 4.78441255                          | 8.497900886                               | 0.010930273                     | 16.2663708                          | 9469.372258                                |
| 4.271298009                         | 12.9204635                                | 0.027221701                     | 7.239012299                         | 2611.99982                                 |
| 4.787351798                         | 10.95025402                               | 0.012159218                     | 31.16737564                         | 20293.34766                                |
| 4.223478531                         | 8.24931603                                | 0.023886065                     | 6.889436559                         | 1560.860941                                |
| 4.528293844                         | 8.553906688                               | 0.011395676                     | 12.16476211                         | 3775.06268                                 |
| 4.10106433                          | 9.826532457                               | 0.032057842                     | 5.585869904                         | 1455.3332                                  |
| 4.065025741                         | 11.46974675                               | 0.069356457                     | 8.426463258                         | 3357.043645                                |
| 4.458441912                         | 13.49172837                               | 0.036888067                     | 12.52638309                         | 5490.202093                                |
| 4.698911244                         | 11.09214501                               | 0.015164423                     | 13.23451957                         | 5295.957045                                |
| 4.217714568                         | 10.28233744                               | 0.035490294                     | 7.316206133                         | 1925.56284                                 |
| 4.013094073                         | 12.22072451                               | 0.060870319                     | 6.557150741                         | 2123.339504                                |
| 4.853933055                         | 9.593263547                               | 0.007983077                     | 15.9772212                          | 7318.356132                                |
| 2.198717867                         | 6.538141026                               | 0.127483974                     | 12.0384602                          | 1866.063486                                |
| 4.461640024                         | 9.447086891                               | 0.013117682                     | 17.50065057                         | 6616.166148                                |
| 4.545841113                         | 9.360962398                               | 0.010605773                     | 11.25649388                         | 3833.250495                                |
| 4.031452787                         | 11.2977486                                | 0.063164709                     | 7.959454379                         | 2828.432913                                |
| 4.603941652                         | 9.317556969                               | 0.016511875                     | 11.33437969                         | 3465.479063                                |
| 5.153590619                         | 12.22582768                               | 0.006491605                     | 29.83746339                         | 22243.32394                                |
| 4.724768785                         | 8.358260419                               | 0.009307698                     | 16.5298162                          | 6306.342705                                |
| 4.675396624                         | 11.95141781                               | 0.012876051                     | 12.76526972                         | 5119.953123                                |
| 4.738992175                         | 7.722768824                               | 0.010747413                     | 21.11643482                         | 16032.50086                                |
| 4.434827021                         | 7.662850462                               | 0.010929425                     | 10.85104403                         | 2936.934744                                |
| 4.922143599                         | 7.813882574                               | 0.00772325                      | 24.30690532                         | 17879.70418                                |
| 4.825635136                         | 9.582412658                               | 0.00961929                      | 17.59615946                         | 13487.50733                                |
| 3.535851447                         | 9.017346615                               | 0.100130951                     | 4.321125072                         | 856.5694525                                |
| 5.01115198                          | 11.7771351                                | 0.007291477                     | 21.34938717                         | 27014.12516                                |
| 4.609540462                         | 7.416195758                               | 0.010243451                     | 16.12288427                         | 5597.777914                                |
| 2.530139924                         | 5.337210012                               | 0.078270158                     | 8.341135104                         | 825.5518924                                |
| 5.091090203                         | 14.26811155                               | 0.008358605                     | 43.83240091                         | 40106.41321                                |
| 4.27519167                          | 11.36621493                               | 0.039443432                     | 8.420357712                         | 2443.622685                                |
| 4.191752691                         | 6.711237623                               | 0.016276601                     | 9.444371683                         | 2176.517239                                |
| 4.628634172                         | 10.87252458                               | 0.012545708                     | 11.6080712                          | 3906.670719                                |
| 4.583302473                         | 8.855197796                               | 0.010901486                     | 13.8219501                          | 4658.9157                                  |
| 3.78544093                          | 10.99319734                               | 0.088074665                     | 6.1271770178                        | 1851.285126                                |
| 4.90686235                          | 10.62849825                               | 0.006632789                     | 21.71637222                         | 10742.28367                                |
| 4.677971455                         | 9.714319663                               | 0.00780787                      | 14.43675888                         | 5482.557537                                |
| 5.299352021                         | 15.8524455                                | 0.004733271                     | 38.60725114                         | 39250.33389                                |
| 4.738304458                         | 8.592882854                               | 0.01040888                      | 15.55948065                         | 7297.711702                                |
| 4.65964                             | 7.696977826                               | 0.01175146                      | 13.20909797                         | 4413.923727                                |
| 4.386152315                         | 7.402450904                               | 0.013763157                     | 9.249692912                         | 2754.408906                                |
| 4.713813447                         | 15.25652232                               | 0.022549764                     | 14.46369522                         | 8142.009862                                |
| 4.176007094                         | 8.108987233                               | 0.032231274                     | 6.447397043                         | 1397.345694                                |
| 4.131018302                         | 7.605468548                               | 0.02393094                      | 6.187980148                         | 936.0261042                                |
| 3.711890875                         | 7.012071786                               | 0.025353028                     | 10.26045517                         | 1791.042146                                |
| 4.715509129                         | 10.24062226                               | 0.009665025                     | 13.24912619                         | 5419.757084                                |
| 4.561593158                         | 9.486268847                               | 0.01241434                      | 22.72934985                         | 9907.049044                                |
| 4.778443523                         | 10.24295194                               | 0.014823377                     | 16.09661726                         | 6708.400591                                |
| 4.63996216                          | 9.140674773                               | 0.010230618                     | 19.2051792                          | 7259.036889                                |
| 4.545333065                         | 10.00202374                               | 0.013415754                     | 10.12782253                         | 2809.200136                                |
| 4.553093052                         | 9.856058543                               | 0.012800243                     | 10.33496207                         | 2976.5952                                  |
| 4.595668265                         | 8.502207643                               | 0.010387319                     | 13.55561121                         | 6784.583817                                |
| 4.165318755                         | 10.97392156                               | 0.043722235                     | 8.281883138                         | 2343.5452                                  |
| 4.008890195                         | 8.415798214                               | 0.061883876                     | 6.740474787                         | 1614.109862                                |
| 3.839323576                         | 12.34356129                               | 0.088706784                     | 6.780248672                         | 2692.056434                                |
| 4.921849355                         | 10.0071904                                | 0.00625011                      | 21.66374078                         | 10380.44149                                |
| 4.375369489                         | 7.311385013                               | 0.012249626                     | 10.90634143                         | 2713.195421                                |
| 4.533012369                         | 7.054772113                               | 0.012004568                     | 16.00284488                         | 6186.576136                                |
| 4.23811499                          | 6.257433773                               | 0.014474572                     | 7.981265807                         | 1760.468772                                |
| 4.355534802                         | 14.21460127                               | 0.023327922                     | 8.964137866                         | 2839.182713                                |
| 4.579406695                         | 10.55073436                               | 0.010994472                     | 20.46919414                         | 8051.821112                                |
| 4.801838637                         | 10.83851208                               | 0.008990428                     | 15.33896107                         | 7826.43495                                 |
| 4.457104181                         | 13.14851979                               | 0.025382832                     | 10.38464726                         | 4453.725419                                |
| 2.973767396                         | 5.334575467                               | 0.057494616                     | 5.548962046                         | 400.857519                                 |
| 4.141608778                         | 9.845758667                               | 0.03321231                      | 6.413704672                         | 1346.940671                                |
| 4.223938332                         | 8.437535478                               | 0.018183914                     | 6.63350541                          | 1321.469559                                |
| 4.581974912                         | 7.195218033                               | 0.01099496                      | 14.89735317                         | 7433.201833                                |
| 5.051851435                         | 14.6845536                                | 0.005324532                     | 26.94391201                         | 18674.02937                                |
| 3.287312254                         | 6.312015015                               | 0.04518355                      | 5.390785546                         | 401.4802048                                |
| 2.515289912                         | 4.222222222                               | 0.077790375                     | 5.95468002                          | 566.7314723                                |
| 4.724297281                         | 14.71940983                               | 0.019907413                     | 15.00542736                         | 7999.934042                                |
| 4.534489103                         | 6.288915928                               | 0.013130124                     | 17.26785182                         | 10943.75848                                |
| 4.233030203                         | 5.752676109                               | 0.015953843                     | 7.724415658                         | 1465.2104                                  |
| 4.585002946                         | 9.707720363                               | 0.016693521                     | 10.39423471                         | 3160.839142                                |
| 4.21273061                          | 10.11918423                               | 0.049362975                     | 8.204476484                         | 2154.347626                                |
| 4.182910466                         | 13.74867897                               | 0.019050387                     | 22.90919354                         | 10711.66631                                |
| 5.019822024                         | 11.1373343                                | 0.006730757                     | 21.42628146                         | 12997.92148                                |
| 2.50921675                          | 3.272530568                               | 0.081660479                     | 3.906832425                         | 190.5496013                                |
| 4.776927493                         | 10.40428743                               | 0.011100898                     | 24.6474069                          | 15605.12469                                |
| 4.720731199                         | 9.738516732                               | 0.012503003                     | 15.90779726                         | 7016.18132                                 |

| log.sigma.5.0.mm.3D_glc_m_SumAverage | log.sigma.5.0.mm.3D_glc_m_lmc2 | log.sigma.5.0.mm.3D_glc_m_lmc1 | log.sigma.5.0.mm.3D_glc_m_DifferenceAverage | log.sigma.5.0.mm.3D_glc_m_Id |
|--------------------------------------|--------------------------------|--------------------------------|---------------------------------------------|------------------------------|
| 19.88946186                          | 0.931807157                    | -0.248644809                   | 2.702180398                                 | 0.389394478                  |
| 19.65359082                          | 0.883158018                    | -0.218987025                   | 1.658436945                                 | 0.514123154                  |
| 14.5147973                           | 0.900410785                    | -0.239625243                   | 2.578198368                                 | 0.387675091                  |
| 25.20642509                          | 0.839687056                    | -0.161183784                   | 2.445886734                                 | 0.425634382                  |
| 22.92398799                          | 0.993593158                    | -0.503555212                   | 4.577233311                                 | 0.280473505                  |
| 13.90304162                          | 0.846635415                    | -0.174600269                   | 2.803141166                                 | 0.37556889                   |
| 7.975510253                          | 0.927133001                    | -0.351792235                   | 2.101207946                                 | 0.449391298                  |
| 17.48937781                          | 0.904933591                    | -0.206768969                   | 3.629341587                                 | 0.332212707                  |
| 40.36783993                          | 0.943080256                    | -0.223519587                   | 4.432681966                                 | 0.311004648                  |
| 20.47010892                          | 0.866508056                    | -0.202556401                   | 1.555372295                                 | 0.521362549                  |
| 12.93539448                          | 0.82703416                     | -0.160988849                   | 2.873663781                                 | 0.390207038                  |
| 18.06085238                          | 0.868364356                    | -0.19308071                    | 2.214065113                                 | 0.437840238                  |
| 11.74613012                          | 0.778037325                    | -0.142853989                   | 2.057826447                                 | 0.4652227                    |
| 18.88663542                          | 0.874511                       | -0.187044133                   | 2.907605494                                 | 0.375434843                  |
| 19.32916289                          | 0.890110961                    | -0.19868981                    | 3.066151669                                 | 0.362772041                  |
| 29.28239217                          | 0.925143758                    | -0.366127874                   | 0.667178712                                 | 0.754577612                  |
| 18.22889554                          | 0.949281052                    | -0.285338136                   | 3.580660145                                 | 0.323060051                  |
| 15.8451796                           | 0.798563903                    | -0.146155564                   | 2.127033233                                 | 0.457999949                  |
| 23.23705389                          | 0.980775686                    | -0.368561402                   | 4.730237338                                 | 0.278469215                  |
| 17.23984641                          | 0.913445897                    | -0.262565602                   | 1.329353843                                 | 0.559720509                  |
| 20.40966772                          | 0.901018415                    | -0.273391691                   | 1.024863336                                 | 0.62864554                   |
| 16.99580177                          | 0.862398168                    | -0.187038256                   | 2.440118951                                 | 0.425880089                  |
| 25.84092701                          | 0.898746428                    | -0.255163088                   | 1.209707201                                 | 0.590305945                  |
| 21.90050804                          | 0.990347624                    | -0.470544551                   | 3.565187014                                 | 0.330114926                  |
| 16.49863206                          | 0.877658713                    | -0.232315482                   | 1.338611926                                 | 0.55977839                   |
| 17.10781338                          | 0.879204612                    | -0.198872642                   | 2.638475112                                 | 0.3885079                    |
| 19.65306491                          | 0.84663856                     | -0.206546841                   | 1.237918297                                 | 0.588340661                  |
| 22.93926145                          | 0.934622388                    | -0.334050828                   | 1.011550331                                 | 0.65535649                   |
| 26.98011282                          | 0.910473309                    | -0.261743395                   | 1.551878772                                 | 0.565654877                  |
| 22.18429002                          | 0.923871096                    | -0.263851964                   | 1.542564761                                 | 0.526747654                  |
| 20.56467487                          | 0.904505381                    | -0.268107479                   | 1.140142167                                 | 0.610008213                  |
| 24.44010487                          | 0.894538677                    | -0.267197101                   | 1.094140858                                 | 0.648719738                  |
| 19.18652709                          | 0.842096428                    | -0.163770435                   | 2.371014781                                 | 0.422859291                  |
| 13.07628205                          | 0.992083215                    | -0.82249007                    | 3.462179487                                 | 0.332208532                  |
| 18.89417378                          | 0.975939897                    | -0.387244551                   | 3.444755661                                 | 0.327412406                  |
| 18.7219248                           | 0.730011657                    | -0.109565826                   | 2.482083712                                 | 0.414334562                  |
| 22.5954972                           | 0.921395337                    | -0.311782995                   | 1.020912276                                 | 0.658918958                  |
| 18.63511394                          | 0.902042335                    | -0.239256638                   | 1.497518237                                 | 0.536629418                  |
| 24.44905226                          | 0.95303726                     | -0.278671708                   | 3.468079906                                 | 0.338996866                  |
| 16.71652084                          | 0.870317543                    | -0.188837965                   | 2.485499073                                 | 0.410468317                  |
| 23.90283561                          | 0.90325945                     | -0.229009796                   | 1.929441468                                 | 0.469552117                  |
| 15.44553765                          | 0.892818156                    | -0.205150909                   | 3.307925152                                 | 0.36436201                   |
| 15.32570092                          | 0.718307578                    | -0.10963662                    | 2.660384917                                 | 0.400267303                  |
| 15.62431151                          | 0.898431745                    | -0.203094726                   | 3.399901253                                 | 0.353177853                  |
| 19.16482532                          | 0.851983273                    | -0.171041647                   | 2.429621822                                 | 0.422504271                  |
| 18.03469323                          | 0.920795968                    | -0.369022641                   | 0.655242376                                 | 0.736374532                  |
| 23.46502174                          | 0.846871887                    | -0.160986604                   | 2.601716722                                 | 0.410929088                  |
| 14.83239152                          | 0.900450591                    | -0.218283283                   | 3.263252651                                 | 0.35481247                   |
| 10.67442002                          | 0.989596182                    | -0.692285862                   | 3.294272394                                 | 0.312200965                  |
| 28.42469859                          | 0.990964453                    | -0.44660693                    | 5.31075737                                  | 0.256658753                  |
| 22.73242985                          | 0.908048167                    | -0.269168225                   | 1.221571286                                 | 0.602459555                  |
| 13.42247525                          | 0.755860375                    | -0.12709624                    | 2.591905052                                 | 0.417327923                  |
| 21.74504916                          | 0.846056715                    | -0.179921621                   | 1.876909732                                 | 0.481619932                  |
| 17.71039559                          | 0.899142497                    | -0.22179047                    | 2.662968568                                 | 0.385588216                  |
| 21.98639469                          | 0.909976198                    | -0.313098589                   | 0.868948755                                 | 0.697171351                  |
| 21.2569965                           | 0.900227918                    | -0.20313707                    | 3.76489288                                  | 0.319057899                  |
| 19.42403975                          | 0.787036618                    | -0.130328649                   | 3.040483464                                 | 0.36483809                   |
| 31.46481659                          | 0.946955308                    | -0.250958846                   | 4.418091835                                 | 0.290098768                  |
| 17.18576571                          | 0.91189058                     | -0.233336452                   | 2.479112141                                 | 0.405834757                  |
| 15.39395565                          | 0.898545424                    | -0.230351321                   | 2.062222736                                 | 0.441585243                  |
| 14.80490181                          | 0.747513287                    | -0.121907945                   | 2.080208279                                 | 0.450531982                  |
| 30.46814665                          | 0.908792368                    | -0.23988367                    | 1.690832662                                 | 0.544532796                  |
| 16.21797447                          | 0.882264465                    | -0.248503498                   | 1.159410791                                 | 0.602490807                  |
| 15.2109371                           | 0.851309869                    | -0.209108812                   | 1.344362689                                 | 0.563111014                  |
| 14.02414357                          | 0.979427373                    | -0.464403333                   | 3.241093672                                 | 0.332765483                  |
| 20.48124451                          | 0.825827084                    | -0.159744389                   | 2.33445604                                  | 0.426103692                  |
| 18.97253769                          | 0.984810793                    | -0.430405209                   | 4.351127123                                 | 0.28421255                   |
| 20.48590388                          | 0.903881665                    | -0.226838479                   | 1.843591116                                 | 0.503500763                  |
| 18.28134955                          | 0.951370288                    | -0.297837925                   | 3.956757986                                 | 0.303898702                  |
| 20.00404747                          | 0.85847041                     | -0.191289798                   | 1.730843973                                 | 0.499482699                  |
| 19.71211709                          | 0.822519032                    | -0.167540609                   | 1.872155945                                 | 0.488429385                  |
| 17.00441529                          | 0.825663736                    | -0.155401688                   | 2.614498533                                 | 0.410464399                  |
| 21.94784313                          | 0.917547045                    | -0.289941411                   | 1.109833459                                 | 0.624565012                  |
| 16.83159643                          | 0.934060598                    | -0.338622393                   | 0.879386374                                 | 0.68176524                   |
| 24.68584029                          | 0.90318069                     | -0.290427301                   | 0.967047967                                 | 0.68772152                   |
| 20.0143808                           | 0.885678408                    | -0.188662378                   | 3.655495216                                 | 0.32954491                   |
| 14.62277003                          | 0.805546581                    | -0.150891886                   | 2.671508997                                 | 0.39345225                   |
| 14.10954423                          | 0.911540898                    | -0.235522697                   | 3.158147708                                 | 0.36391467                   |
| 12.51486755                          | 0.716462002                    | -0.115182846                   | 2.146035957                                 | 0.453520958                  |
| 28.42920255                          | 0.885943801                    | -0.228641115                   | 1.490549052                                 | 0.553159975                  |
| 21.10146872                          | 0.969920638                    | -0.351231204                   | 4.23829156                                  | 0.298800426                  |
| 21.67462547                          | 0.848482475                    | -0.166276748                   | 2.489263722                                 | 0.416189235                  |
| 26.29367861                          | 0.880876788                    | -0.225002023                   | 1.534734291                                 | 0.557315067                  |
| 10.66915093                          | 0.968542096                    | -0.509536966                   | 2.379496145                                 | 0.410594157                  |
| 19.69151733                          | 0.866381559                    | -0.223409328                   | 1.235412642                                 | 0.597753925                  |
| 16.87507096                          | 0.743480739                    | -0.136697541                   | 1.652939224                                 | 0.515067436                  |
| 14.39043607                          | 0.863821419                    | -0.184867471                   | 2.717192383                                 | 0.395493075                  |
| 29.11346897                          | 0.886668421                    | -0.179500574                   | 4.14352176                                  | 0.304647999                  |
| 12.62403003                          | 0.92956642                     | -0.35895247                    | 2.334973082                                 | 0.43074114                   |
| 8.44444444                           | 0.988692034                    | -0.706892635                   | 2.603174603                                 | 0.365740741                  |
| 29.41561508                          | 0.91033631                     | -0.240702691                   | 1.724212341                                 | 0.528877156                  |
| 12.57783186                          | 0.903142161                    | -0.22877838                    | 2.948037081                                 | 0.382298426                  |
| 11.50535222                          | 0.812737162                    | -0.167805328                   | 1.900381115                                 | 0.467778637                  |
| 19.41544073                          | 0.910232686                    | -0.251222558                   | 1.434214466                                 | 0.548498871                  |
| 20.23836845                          | 0.924544364                    | -0.298652518                   | 1.084784322                                 | 0.635853914                  |
| 27.49735794                          | 0.994509271                    | -0.563255945                   | 4.379346749                                 | 0.276513882                  |
| 22.26761118                          | 0.874967218                    | -0.18013756                    | 3.05031692                                  | 0.368366121                  |
| 6.545061135                          | 0.952421685                    | -0.523797837                   | 2.184594252                                 | 0.423015052                  |
| 20.80857485                          | 0.978693153                    | -0.383887393                   | 3.151730329                                 | 0.350524433                  |
| 19.47703346                          | 0.943468014                    | -0.288193908                   | 2.361921156                                 | 0.43309675                   |

| log.sigma.5.0.mm.3D_glcm_ClusterTendency | log.sigma.5.0.mm.3D_firstorder_InterquartileRange | log.sigma.5.0.mm.3D_firstorder_Skewness | log.sigma.5.0.mm.3D_firstorder_Uniformity |
|------------------------------------------|---------------------------------------------------|-----------------------------------------|-------------------------------------------|
| 77.92436684                              | 176.4224701                                       | -0.042719992                            | 0.057465796                               |
| 37.06484126                              | 123.6477985                                       | -0.362879372                            | 0.087062699                               |
| 29.77325983                              | 100.7828522                                       | 0.248670411                             | 0.089725175                               |
| 57.71906416                              | 147.2548141                                       | 0.161584729                             | 0.065784484                               |
| 130.2530581                              | 227.697464                                        | 0.302219462                             | 0.049897069                               |
| 34.80488644                              | 133.7296982                                       | 0.018065185                             | 0.078204784                               |
| 15.46204011                              | 82.99454212                                       | 0.761321138                             | 0.132244898                               |
| 77.87065228                              | 200.5261993                                       | 0.507521638                             | 0.055652639                               |
| 316.3482346                              | 281.168438                                        | 0.633351803                             | 0.035827072                               |
| 31.6856638                               | 109.8533325                                       | 0.020942896                             | 0.090051417                               |
| 39.08512815                              | 164.7533455                                       | 0.308087498                             | 0.073845632                               |
| 45.91979057                              | 146.9003563                                       | 0.23566738                              | 0.072075861                               |
| 35.50044499                              | 110.3165531                                       | 1.134349563                             | 0.091573435                               |
| 60.82309875                              | 178.6016846                                       | 0.24865868                              | 0.061380854                               |
| 53.86508478                              | 153.7995558                                       | 0.231354305                             | 0.066100109                               |
| 17.95883493                              | 36.77934003                                       | -1.73813289                             | 0.209316114                               |
| 62.35947431                              | 172.0007172                                       | 0.004602057                             | 0.062243836                               |
| 35.5257546                               | 109.2122993                                       | 0.534227909                             | 0.083623392                               |
| 108.6020714                              | 232.7642736                                       | -0.027259567                            | 0.048605241                               |
| 34.21284338                              | 122.956424                                        | -0.212253686                            | 0.092801423                               |
| 20.91653307                              | 90.41501617                                       | -0.465654843                            | 0.123298619                               |
| 54.63798684                              | 150.047657                                        | 0.644683514                             | 0.072322854                               |
| 25.9204272                               | 93.81931591                                       | -0.632381137                            | 0.11193845                                |
| 104.9392956                              | 241.7350464                                       | -0.06753344                             | 0.053536096                               |
| 24.02543974                              | 89.67090988                                       | -0.306589389                            | 0.110568576                               |
| 37.44644686                              | 124.4592133                                       | -0.026519398                            | 0.081487654                               |
| 19.12085904                              | 75.06896782                                       | -0.239337851                            | 0.125249426                               |
| 31.16136212                              | 115.5367785                                       | -0.786709707                            | 0.136358947                               |
| 44.56245595                              | 137.5127101                                       | -0.535141959                            | 0.104025765                               |
| 48.50354824                              | 141.9265785                                       | -0.342764027                            | 0.077579792                               |
| 26.49550351                              | 103.2673759                                       | -0.436325838                            | 0.115435217                               |
| 22.97723503                              | 83.2706852                                        | -0.471208891                            | 0.145335971                               |
| 54.20433592                              | 153.3317642                                       | 0.285281766                             | 0.066335773                               |
| 30.28396902                              | 170.0989723                                       | -0.049714467                            | 0.12                                      |
| 51.92961994                              | 144.8092957                                       | 0.000687943                             | 0.069778369                               |
| 34.41742015                              | 123.3908577                                       | 0.477993622                             | 0.081270834                               |
| 29.17320701                              | 94.63299298                                       | -0.949556564                            | 0.143980293                               |
| 41.08472148                              | 144.1076212                                       | -0.024843118                            | 0.081944744                               |
| 100.024075                               | 195.0857391                                       | -0.188926965                            | 0.054357004                               |
| 55.75318897                              | 176.6806412                                       | 0.184113525                             | 0.067333867                               |
| 44.43101187                              | 130.2024364                                       | -0.220955894                            | 0.081711575                               |
| 65.81669311                              | 183.0179749                                       | 0.694681493                             | 0.064569685                               |
| 31.46334646                              | 134.0009117                                       | 0.442923164                             | 0.078565369                               |
| 77.71413005                              | 200.2365417                                       | 0.469115598                             | 0.056304191                               |
| 60.20248675                              | 138.3160934                                       | 0.676416486                             | 0.071563072                               |
| 16.13911061                              | 71.06941263                                       | -1.076396669                            | 0.195101914                               |
| 70.76022007                              | 141.7395064                                       | 0.727954105                             | 0.067504929                               |
| 47.6610496                               | 162.5002556                                       | 0.234689052                             | 0.067751616                               |
| 17.5454484                               | 97.20629311                                       | 0.171732452                             | 0.123966942                               |
| 131.6269371                              | 248.6741333                                       | -0.05589925                             | 0.047288422                               |
| 30.41305423                              | 116.2898359                                       | -0.433332324                            | 0.11310866                                |
| 25.95801173                              | 127.3490067                                       | 0.650967057                             | 0.091097168                               |
| 40.05804871                              | 129.4459095                                       | -0.127542676                            | 0.082331009                               |
| 44.10240442                              | 134.4803562                                       | -0.117738384                            | 0.078237426                               |
| 22.38692792                              | 67.66759476                                       | -1.140371121                            | 0.179130656                               |
| 64.89362389                              | 186.2028809                                       | 0.045664602                             | 0.058445088                               |
| 42.58701047                              | 136.6311569                                       | 0.267593316                             | 0.072016244                               |
| 121.1174414                              | 214.2080402                                       | -0.407391809                            | 0.047872848                               |
| 52.13993105                              | 145.1681995                                       | 0.352314409                             | 0.071164097                               |
| 46.04646953                              | 143.1791534                                       | 0.08837347                              | 0.075254656                               |
| 29.42991686                              | 105.5966225                                       | 0.689911095                             | 0.095270958                               |
| 50.77816744                              | 135.7444887                                       | -0.105065852                            | 0.086480045                               |
| 22.98037867                              | 88.1409359                                        | -0.415358986                            | 0.119087746                               |
| 21.25853081                              | 100.4184246                                       | -0.128051086                            | 0.113048429                               |
| 25.57196724                              | 117.117569                                        | 0.106811609                             | 0.094339623                               |
| 43.57200412                              | 123.2399529                                       | -0.025377702                            | 0.078762478                               |
| 62.83955445                              | 192.59552                                         | -0.002172638                            | 0.060498866                               |
| 57.66730871                              | 169.3186789                                       | -0.111244932                            | 0.073734479                               |
| 53.72957812                              | 163.4323349                                       | 0.007945565                             | 0.068609712                               |
| 34.99829868                              | 121.7034845                                       | -0.095812258                            | 0.086147386                               |
| 34.58244152                              | 119.2736568                                       | -0.045391564                            | 0.084613151                               |
| 42.05247872                              | 125.9049149                                       | 0.723214398                             | 0.075445816                               |
| 30.35457503                              | 113.0789664                                       | -0.666904083                            | 0.120992086                               |
| 25.04990269                              | 97.73008162                                       | -0.756750953                            | 0.136541172                               |
| 24.22148559                              | 61.54883099                                       | -0.676965273                            | 0.177010209                               |
| 65.26219701                              | 185.8269119                                       | 0.124480124                             | 0.057310624                               |
| 31.99663436                              | 138.0472374                                       | 0.407345843                             | 0.079312865                               |
| 47.68330872                              | 171.8555374                                       | 0.482217168                             | 0.069116709                               |
| 23.64815937                              | 100.0078583                                       | 0.509366698                             | 0.095676543                               |
| 31.2679275                               | 113.3395176                                       | -0.281272676                            | 0.097532474                               |
| 54.20364102                              | 173.6422729                                       | 0.135569154                             | 0.065177244                               |
| 50.44221928                              | 127.8276367                                       | 0.257895437                             | 0.071816633                               |
| 36.19667187                              | 106.6550291                                       | -0.471742524                            | 0.102313184                               |
| 13.26059583                              | 78.67526054                                       | 0.04645435                              | 0.146722164                               |
| 22.25587116                              | 90.98739505                                       | -0.418652599                            | 0.120403661                               |
| 21.34548771                              | 92.38001919                                       | 0.416587792                             | 0.105981934                               |
| 46.98256317                              | 145.4094391                                       | 0.708161564                             | 0.07299681                                |
| 76.76975944                              | 187.177063                                        | 0.157396424                             | 0.054407199                               |
| 12.53372523                              | 94.59080029                                       | 0.26228779                              | 0.1336                                    |
| 13.51713278                              | 85.24024963                                       | 0.540616834                             | 0.136094675                               |
| 53.38538543                              | 145.1027317                                       | -0.457786345                            | 0.08593838                                |
| 54.26111129                              | 155.400013                                        | 0.938721386                             | 0.076480263                               |
| 24.69801253                              | 107.6607513                                       | 0.331822697                             | 0.095055936                               |
| 37.50004599                              | 122.3367491                                       | -0.140873742                            | 0.08535961                                |
| 30.05701126                              | 113.4681613                                       | -0.446599772                            | 0.119894778                               |
| 64.05854636                              | 188.9994049                                       | -0.312270874                            | 0.062736206                               |
| 70.08954281                              | 168.2199078                                       | 0.119686689                             | 0.060964533                               |
| 8.047915738                              | 69.80059052                                       | 0.653220785                             | 0.15625                                   |
| 83.32453577                              | 192.761444                                        | 0.244547202                             | 0.062290639                               |
| 53.70205214                              | 157.4287744                                       | -0.10722983                             | 0.070994898                               |

| log.sigma.5.0.mm.3D_firstorder_MeanAbsoluteDeviation | log.sigma.5.0.mm.3D_firstorder_Energy | log.sigma.5.0.mm.3D_firstorder_RobustMeanAbsoluteDeviation | log.sigma.5.0.mm.3D_firstorder_Median |
|------------------------------------------------------|---------------------------------------|------------------------------------------------------------|---------------------------------------|
| 100.5430279                                          | 15679851.89                           | 75.68470233                                                | -162.0469971                          |
| 67.19723426                                          | 26388973.29                           | 49.56630615                                                | -103.9174728                          |
| 65.68580071                                          | 7257608.473                           | 45.35845222                                                | -193.8518066                          |
| 86.70163054                                          | 45014803.68                           | 60.64137269                                                | -105.8097534                          |
| 136.2300109                                          | 5725406.265                           | 102.7208062                                                | -204.0945282                          |
| 74.68370646                                          | 18841107.82                           | 55.88038184                                                | -259.5412292                          |
| 53.60526736                                          | 612456.8259                           | 38.64629986                                                | -83.65852737                          |
| 109.5245749                                          | 29300520.06                           | 78.35531964                                                | -252.9199829                          |
| 177.7575684                                          | 74000963.01                           | 123.3472873                                                | -72.82268906                          |
| 63.00390978                                          | 38592044.63                           | 44.50453016                                                | -101.7311935                          |
| 84.53561799                                          | 26587674.4                            | 65.0599252                                                 | -251.3699341                          |
| 79.91239409                                          | 19058957.15                           | 60.10743674                                                | -126.2535934                          |
| 72.5487323                                           | 33313774.67                           | 47.79604287                                                | -146.6660843                          |
| 95.80607528                                          | 18925997                              | 72.63518758                                                | -157.1279144                          |
| 87.28362576                                          | 7404818.834                           | 62.33003458                                                | -95.7151947                           |
| 38.08775884                                          | 38259673.94                           | 18.87713255                                                | -5.010635376                          |
| 97.35113225                                          | 13971649.28                           | 71.70866612                                                | -211.0669403                          |
| 69.01605563                                          | 47777512.52                           | 45.9822012                                                 | -157.296669                           |
| 129.3206698                                          | 9948970.529                           | 95.8636399                                                 | -167.7818146                          |
| 64.14951834                                          | 29404117.9                            | 49.14039039                                                | -61.29930115                          |
| 50.1203259                                           | 54546487.57                           | 36.96495332                                                | -76.84919739                          |
| 86.39587991                                          | 20636114.79                           | 61.13612719                                                | -124.4781265                          |
| 53.84730738                                          | 36461957.45                           | 37.97317305                                                | -83.17770004                          |
| 118.6797402                                          | 2828335.461                           | 93.29240786                                                | -54.4531517                           |
| 53.29846035                                          | 14194251.92                           | 37.30723425                                                | -92.32361221                          |
| 72.55013333                                          | 14757582.83                           | 50.30391027                                                | -196.4334488                          |
| 47.46801602                                          | 17648208.58                           | 31.83404727                                                | -56.37356186                          |
| 61.86089731                                          | 44804516.31                           | 46.42532659                                                | -60.05125809                          |
| 73.78844915                                          | 64871711.09                           | 55.33938805                                                | -82.36061096                          |
| 76.76516957                                          | 44954787.34                           | 58.10873411                                                | -126.7984161                          |
| 56.16646226                                          | 47045874.39                           | 41.27632624                                                | -71.30812836                          |
| 51.6790103                                           | 64696677.37                           | 34.95813158                                                | -37.71105194                          |
| 86.49479659                                          | 40379291.45                           | 63.38697194                                                | -142.2446289                          |
| 82.87807758                                          | 144249.2906                           | 63.85249675                                                | -24.03824615                          |
| 86.25667455                                          | 4617828.774                           | 61.09356152                                                | -174.0276489                          |
| 72.85892104                                          | 58535051.38                           | 51.27489094                                                | -199.8768539                          |
| 57.72254434                                          | 54566235.35                           | 41.2200661                                                 | -30.16950798                          |
| 74.3044779                                           | 39469100.18                           | 57.16076855                                                | -66.97212219                          |
| 114.0563153                                          | 10785510.25                           | 85.88006412                                                | -105.8437119                          |
| 89.73533232                                          | 24300792.09                           | 70.24039173                                                | -187.4983368                          |
| 73.59316208                                          | 13482426.49                           | 53.78947027                                                | -95.14821625                          |
| 103.7287093                                          | 27229381.88                           | 75.28841297                                                | -255.7955475                          |
| 75.11438336                                          | 48201681.8                            | 55.15635712                                                | -234.7351303                          |
| 110.8595395                                          | 26765475.53                           | 83.93550509                                                | -219.0989532                          |
| 84.45323949                                          | 32522139.17                           | 57.90537769                                                | -153.1283264                          |
| 43.22964747                                          | 26109402.79                           | 31.08206571                                                | -16.09984016                          |
| 85.16309679                                          | 44624408.55                           | 58.29863552                                                | -66.87311554                          |
| 89.44336693                                          | 19371431.47                           | 67.75684642                                                | -279.5750427                          |
| 60.29258799                                          | 411048.5647                           | 39.5778189                                                 | -106.9541092                          |
| 137.4337698                                          | 8965853.237                           | 101.2629166                                                | -180.285347                           |
| 61.35783104                                          | 45955181.87                           | 46.16284606                                                | -62.73266792                          |
| 71.4401633                                           | 38867518.23                           | 53.07060384                                                | -320.1044006                          |
| 70.75499046                                          | 62790810.08                           | 52.05860812                                                | -103.6686707                          |
| 79.31821634                                          | 5524970.059                           | 58.53420482                                                | -107.7216873                          |
| 48.99845055                                          | 59340166.97                           | 31.73901368                                                | -12.42837477                          |
| 100.9516603                                          | 24159885.6                            | 73.6767208                                                 | -238.6360626                          |
| 79.64478311                                          | 42182435.89                           | 56.16615807                                                | -201.1300278                          |
| 123.5838121                                          | 29200698.62                           | 86.38099994                                                | -184.6876526                          |
| 82.81115129                                          | 14974243.75                           | 58.92536821                                                | -188.7942429                          |
| 78.17606332                                          | 12336884.13                           | 57.72874882                                                | -134.6964111                          |
| 63.61976092                                          | 51084770.89                           | 44.56191788                                                | -182.5570374                          |
| 78.13741689                                          | 105846333.4                           | 55.44256033                                                | -62.265522                            |
| 51.97597351                                          | 20693863.33                           | 37.06746113                                                | -18.0474577                           |
| 51.77530821                                          | 15288139.26                           | 39.79375339                                                | -67.26261902                          |
| 66.01224518                                          | 2826108.088                           | 46.40495334                                                | -213.8679504                          |
| 72.81074222                                          | 15089728.81                           | 50.10233475                                                | -63.61804008                          |
| 104.5488766                                          | 7231427.367                           | 75.29076382                                                | -232.5020294                          |
| 86.31013422                                          | 71988768.68                           | 67.06744208                                                | -90.69963837                          |
| 92.61395335                                          | 16894078.89                           | 67.17089468                                                | -314.1331787                          |
| 66.50170727                                          | 31758021.13                           | 49.492008                                                  | -104.0662651                          |
| 66.55906759                                          | 49251368.77                           | 48.21200839                                                | -108.8550949                          |
| 79.16954583                                          | 35637907.83                           | 53.57207749                                                | -243.1071167                          |
| 60.2658186                                           | 64501567.25                           | 46.14950576                                                | -44.15099335                          |
| 55.20115702                                          | 77126077.18                           | 41.25053908                                                | -30.97235012                          |
| 48.83922607                                          | 74355548.87                           | 29.57927803                                                | -5.687800407                          |
| 100.8187337                                          | 30869032.95                           | 75.83108829                                                | -239.3007431                          |
| 73.9438107                                           | 28013004.39                           | 55.37441961                                                | -238.566658                           |
| 89.69736095                                          | 17409814.84                           | 67.08859669                                                | -271.026947                           |
| 60.36656413                                          | 49678179.18                           | 41.39991684                                                | -225.7589874                          |
| 62.40406887                                          | 45580000.71                           | 46.62330046                                                | -101.8123894                          |
| 95.1092381                                           | 19258920.73                           | 69.90834973                                                | -348.2901306                          |
| 79.74730702                                          | 28247636.47                           | 54.07768059                                                | -155.9938354                          |
| 64.62345525                                          | 47665169.34                           | 45.03317864                                                | -38.7555542                           |
| 48.60028345                                          | 258260.1704                           | 35.93954946                                                | -67.63511658                          |
| 52.11558264                                          | 40758277.1                            | 37.70897764                                                | -54.77502251                          |
| 53.79718981                                          | 32348732.74                           | 38.24189941                                                | -73.33790588                          |
| 85.52836401                                          | 20052381.3                            | 61.72784264                                                | -227.6864319                          |
| 107.8624862                                          | 53128709.64                           | 77.1876918                                                 | -269.2327881                          |
| 51.2397851                                           | 471620.2396                           | 37.71156717                                                | -87.38605881                          |
| 55.0693321                                           | 313769.9449                           | 31.60988758                                                | -158.1386566                          |
| 78.21258183                                          | 59543620.35                           | 57.40651193                                                | -75.68774414                          |
| 88.60835029                                          | 20654043.51                           | 61.73920327                                                | -255.506279                           |
| 59.71239055                                          | 9435170.655                           | 43.83205751                                                | -135.9260559                          |
| 67.28453726                                          | 55375996.21                           | 50.08889154                                                | -93.42545319                          |
| 62.13133924                                          | 63636320.93                           | 46.83097646                                                | -36.94255829                          |
| 106.9413206                                          | 4408000.74                            | 74.57560958                                                | -216.2618866                          |
| 96.8919316                                           | 22323060.86                           | 69.14409149                                                | -136.1845703                          |
| 43.6661054                                           | 293106.9602                           | 30.97092845                                                | -120.0873146                          |
| 105.0777555                                          | 4395609.955                           | 78.72740629                                                | -122.0995865                          |
| 84.54262994                                          | 6592736.146                           | 61.42908296                                                | -103.015316                           |

| log.sigma.5.0.mm.3D_firstorder_TotalEnergy | log.sigma.5.0.mm.3D_firstorder_Maximum | log.sigma.5.0.mm.3D_firstorder_RootMeanSquared | log.sigma.5.0.mm.3D_firstorder_90Percentile | log.sigma.5.0.mm.3D_firstorder_Minimum |
|--------------------------------------------|----------------------------------------|------------------------------------------------|---------------------------------------------|----------------------------------------|
| 423356001.1                                | 125.6305084                            | 208.4094354                                    | -16.9026432                                 | -423.6070557                           |
| 712502278.9                                | 110.4570313                            | 137.1457681                                    | -12.76608238                                | -349.6224365                           |
| 195955428.8                                | 10.57273388                            | 202.4930559                                    | -71.42450562                                | -356.6855774                           |
| 1215399699                                 | 268.9962158                            | 152.6025368                                    | 27.55214005                                 | -420.5271606                           |
| 154585969.2                                | 177.815567                             | 238.0907196                                    | 63.31339264                                 | -466.1383667                           |
| 508709911.2                                | -67.83268738                           | 277.8806489                                    | -147.2664948                                | -432.8607178                           |
| 16536334.3                                 | 104.7764435                            | 93.53813783                                    | 32.72114258                                 | -166.3795319                           |
| 791114041.7                                | 216.9400635                            | 270.3120948                                    | -42.09953308                                | -468.4841309                           |
| 1998026001                                 | 511.5474548                            | 223.9110399                                    | 342.7444611                                 | -475.5308838                           |
| 1041985205                                 | 162.904068                             | 129.0026168                                    | -4.185625267                                | -344.0487366                           |
| 717867208.9                                | 45.85198593                            | 265.9170924                                    | -110.8995705                                | -424.4159546                           |
| 514591843.2                                | 220.7097321                            | 158.6724864                                    | -0.209500003                                | -333.1751709                           |
| 899471916                                  | 250.0553131                            | 156.1660308                                    | 7.938313246                                 | -273.8922729                           |
| 511001919                                  | 157.1331329                            | 189.3269429                                    | 3.144880891                                 | -382.8885498                           |
| 199930108.5                                | 232.2554321                            | 142.6285697                                    | 45.66846581                                 | -329.3588257                           |
| 1033011196                                 | 237.0324554                            | 59.44242366                                    | 28.56527843                                 | -351.9190063                           |
| 377234530.4                                | 56.29323196                            | 253.7429418                                    | -71.57694397                                | -465.6961365                           |
| 1289992838                                 | 250.9879761                            | 175.4550647                                    | -39.53741112                                | -349.2285767                           |
| 268622204.3                                | 157.0686035                            | 233.8047759                                    | 23.10036392                                 | -487.5423889                           |
| 793911183.3                                | 141.8489227                            | 102.9558075                                    | 21.80286961                                 | -265.7252808                           |
| 1472755164                                 | 168.8114471                            | 103.6729298                                    | -9.115769768                                | -311.4815063                           |
| 557175099.4                                | 219.0461884                            | 172.6718171                                    | 39.46540375                                 | -323.4521484                           |
| 984472851.3                                | 155.2089539                            | 111.7451195                                    | -8.057811069                                | -376.4219666                           |
| 76365057.45                                | 229.0911865                            | 145.82757                                      | 129.2800949                                 | -324.4385071                           |
| 383244801.8                                | 123.0152206                            | 121.5963777                                    | -23.19573612                                | -276.3450623                           |
| 398454736.4                                | 23.57508659                            | 121.0569346                                    | -92.8379364                                 | -413.1448669                           |
| 476501631.7                                | 200.5670013                            | 87.8066519                                     | 3.848697519                                 | -294.759613                            |
| 1209721940                                 | 306.595459                             | 107.2524362                                    | -2.61222806                                 | -329.7709656                           |
| 1751536200                                 | 293.9125061                            | 132.1264675                                    | -5.967617273                                | -413.7554321                           |
| 1213779258                                 | 104.6431503                            | 162.9519248                                    | -20.03747482                                | -386.6417236                           |
| 1270238609                                 | 182.7259216                            | 105.824063                                     | -6.722863674                                | -301.5285034                           |
| 1746810289                                 | 327.8135376                            | 85.58287532                                    | 2.260182524                                 | -330.2314453                           |
| 1090240869                                 | 206.1259308                            | 170.5015079                                    | 2.214687443                                 | -362.3525085                           |
| 3894730.846                                | 110.8400726                            | 98.06436341                                    | 90.01460419                                 | -172.4747772                           |
| 124681376.9                                | 91.68953705                            | 202.1527674                                    | -35.95634537                                | -414.283905                            |
| 1580446387                                 | 129.8475494                            | 209.4739813                                    | -64.47775955                                | -401.677124                            |
| 1473288354                                 | 218.1811981                            | 90.30597397                                    | 3.539712191                                 | -318.223999                            |
| 1065665705                                 | 201.672287                             | 114.0943174                                    | 32.94579964                                 | -299.2250366                           |
| 291208776.7                                | 198.0095978                            | 183.3022651                                    | 49.30227661                                 | -429.7382507                           |
| 656121386.3                                | 66.88095093                            | 212.7272236                                    | -43.64580841                                | -383.4181213                           |
| 364025515.2                                | 184.3509064                            | 137.3191194                                    | -1.52205081                                 | -382.4237061                           |
| 735193310.7                                | 150.451828                             | 267.3353585                                    | -47.87880325                                | -446.3042603                           |
| 1301445409                                 | 102.0536728                            | 241.8619165                                    | -95.49287415                                | -421.0270691                           |
| 722667839.7                                | 228.1120148                            | 246.919405                                     | -12.30635319                                | -424.3555908                           |
| 878097757.5                                | 230.6707458                            | 170.7859415                                    | 14.22932358                                 | -356.0071106                           |
| 704953875.4                                | 75.93095398                            | 65.3058079                                     | 7.974059153                                 | -226.1424713                           |
| 1204859031                                 | 541.81073                              | 127.4782139                                    | 70.10780716                                 | -338.1052856                           |
| 523028649.6                                | 5.376304626                            | 291.4831362                                    | -124.8148277                                | -466.6448669                           |
| 11098311.25                                | 43.32533264                            | 136.6895229                                    | -33.39332008                                | -233.6198578                           |
| 242078037.4                                | 220.977005                             | 247.8103179                                    | 28.82651806                                 | -554.1082764                           |
| 1240789910                                 | 183.6621704                            | 106.1297553                                    | -0.346937823                                | -330.8377991                           |
| 1049422992                                 | -24.91174698                           | 310.5566851                                    | -175.0663239                                | -450.0609436                           |
| 1695351872                                 | 246.4198303                            | 140.188572                                     | -11.56729202                                | -370.3661804                           |
| 149174191.6                                | 117.3640137                            | 152.0428543                                    | -9.03211422                                 | -332.1437683                           |
| 1602184508                                 | 208.2916565                            | 72.44691412                                    | 17.66286182                                 | -298.4160156                           |
| 652316911.2                                | 69.86597443                            | 268.5499237                                    | -75.23310699                                | -506.7993164                           |
| 1138925769                                 | 213.4348602                            | 219.9417038                                    | -75.02063599                                | -446.1629028                           |
| 788418862.6                                | 170.5473022                            | 252.5014532                                    | -21.06905632                                | -619.9633789                           |
| 404304581.3                                | 143.8793945                            | 205.6699385                                    | -44.81474495                                | -382.5334167                           |
| 333095871.5                                | 101.8463287                            | 162.7083289                                    | -3.420511603                                | -321.7207336                           |
| 1379288814                                 | 148.7819824                            | 187.3761142                                    | -56.57905731                                | -349.6957092                           |
| 2857851003                                 | 398.8364868                            | 124.9830765                                    | 13.66553926                                 | -437.7503967                           |
| 558734309.8                                | 267.6526184                            | 71.27057718                                    | 37.90251274                                 | -220.1207123                           |
| 412779760                                  | 87.2272644                             | 92.6239857                                     | 9.861229992                                 | -230.1676483                           |
| 76304918.39                                | 8.872081757                            | 230.9172885                                    | -118.7910263                                | -387.6362915                           |
| 407422677.8                                | 265.577179                             | 114.4496523                                    | 42.75135612                                 | -316.236969                            |
| 195248538.9                                | 56.9070282                             | 262.4323472                                    | -68.82391663                                | -498.6007996                           |
| 1943696754                                 | 234.8069611                            | 144.0971701                                    | 9.523664665                                 | -345.2637329                           |
| 456140129.9                                | -54.92046356                           | 343.7155973                                    | -186.4777588                                | -550.380127                            |
| 857466570.5                                | 146.3389893                            | 133.1244155                                    | -3.433187127                                | -325.6316223                           |
| 1329786957                                 | 177.1464844                            | 137.6594445                                    | -7.502354336                                | -334.4685669                           |
| 962223511.3                                | 138.8155365                            | 250.7059093                                    | -90.74356842                                | -438.938385                            |
| 1741542316                                 | 165.1593018                            | 95.60378244                                    | 5.540915489                                 | -320.97995                             |
| 2082404084                                 | 155.0236664                            | 84.37352734                                    | 10.18230829                                 | -242.6341248                           |
| 2007599819                                 | 338.1176147                            | 71.56296719                                    | 23.72852936                                 | -312.5830078                           |
| 833463889.5                                | 78.47826385                            | 263.0837858                                    | -73.80821228                                | -496.789978                            |
| 756351118.6                                | 72.99599457                            | 247.854851                                     | -112.8302765                                | -409.1134949                           |
| 470065000.6                                | 52.65500641                            | 278.7873521                                    | -106.2261116                                | -425.0961914                           |
| 1341310838                                 | 28.82912636                            | 233.2638536                                    | -115.9885178                                | -372.5852661                           |
| 1230660019                                 | 157.7985535                            | 129.8326197                                    | -13.56189747                                | -447.2629395                           |
| 519990859.8                                | -78.77205658                           | 359.5198208                                    | -179.4882843                                | -601.6439209                           |
| 762686184.6                                | 205.4516602                            | 180.7103404                                    | -14.36930599                                | -403.5884094                           |
| 1286959572                                 | 316.0688477                            | 98.33795239                                    | 26.8116436                                  | -374.9187012                           |
| 6973024.602                                | 53.73376846                            | 91.27416524                                    | 12.03725147                                 | -195.0429993                           |
| 1100473482                                 | 189.5799408                            | 90.63157533                                    | 3.885932875                                 | -297.6104126                           |
| 873415783.9                                | 191.5812073                            | 96.04190218                                    | 21.14807968                                 | -252.4339905                           |
| 541414295                                  | 171.4824066                            | 234.3886323                                    | -58.56790085                                | -390.9079285                           |
| 1434475160                                 | 138.29599                              | 300.3357195                                    | -93.69451141                                | -643.5793457                           |
| 12733746.47                                | 53.74763489                            | 97.12056833                                    | -48.11005557                                | -214.0175018                           |
| 8471788.512                                | -4.102388859                           | 155.3581334                                    | -39.10442657                                | -245.1300812                           |
| 1607677749                                 | 311.1950073                            | 131.7752582                                    | 5.359745312                                 | -432.0480042                           |
| 557659174.9                                | 164.4007416                            | 260.6548151                                    | -68.40704422                                | -399.6130676                           |
| 254749607.7                                | 80.53678131                            | 150.6011245                                    | -38.4646759                                 | -273.1574097                           |
| 1495151898                                 | 142.598465                             | 123.1389346                                    | 9.917567444                                 | -316.4776001                           |
| 1718180665                                 | 202.5982819                            | 93.86934547                                    | 13.1967494                                  | -278.1679993                           |
| 119016020                                  | 44.65192413                            | 264.5151522                                    | -69.84152832                                | -553.4043579                           |
| 602722643.4                                | 206.4309998                            | 181.185073                                     | 20.14882259                                 | -402.5069275                           |
| 7913887.925                                | 8.332927704                            | 110.5114927                                    | -25.28156643                                | -161.437561                            |
| 118681468.8                                | 157.5339355                            | 164.2161144                                    | 66.05570068                                 | -357.6609192                           |
| 178003876                                  | 181.8856354                            | 153.4453852                                    | 10.40903969                                 | -345.6373291                           |

| log.sigma.5.0.mm.3D_firstorder_Entropy | log.sigma.5.0.mm.3D_firstorder_StandardDeviation | log.sigma.5.0.mm.3D_firstorder_Range | log.sigma.5.0.mm.3D_firstorder_Variance | log.sigma.5.0.mm.3D_firstorder_10Percentile |
|----------------------------------------|--------------------------------------------------|--------------------------------------|-----------------------------------------|---------------------------------------------|
| 4.241723929                            | 120.2733976                                      | 549.2375641                          | 14465.69017                             | -339.1737061                                |
| 3.695289598                            | 81.63920385                                      | 460.0794678                          | 6664.959605                             | -223.8264984                                |
| 3.672785626                            | 81.43625698                                      | 367.2583113                          | 6631.863951                             | -284.0565674                                |
| 4.146432493                            | 108.3996153                                      | 689.5233765                          | 11750.4766                              | -249.4848511                                |
| 4.469864954                            | 162.1049735                                      | 643.9539337                          | 26278.02243                             | -374.4842224                                |
| 3.786946935                            | 88.61770378                                      | 365.0280304                          | 7853.097423                             | -387.9372955                                |
| 3.170343164                            | 65.49171956                                      | 271.1559753                          | 4289.165331                             | -145.735611                                 |
| 4.346866553                            | 135.0035632                                      | 685.4241943                          | 18225.96208                             | -399.7626038                                |
| 4.996971583                            | 222.132089                                       | 987.0783386                          | 49342.66494                             | -288.4004059                                |
| 3.68377071                             | 78.21847415                                      | 506.9528046                          | 6118.129699                             | -205.5670044                                |
| 3.901930876                            | 99.96158211                                      | 470.2679405                          | 9992.317898                             | -370.4682159                                |
| 3.930814312                            | 95.99713689                                      | 553.884903                           | 9215.450292                             | -250.7210999                                |
| 3.734320843                            | 93.47923038                                      | 523.9475861                          | 8738.366512                             | -223.1098328                                |
| 4.153286089                            | 113.7709921                                      | 540.0216827                          | 12943.83864                             | -292.2774353                                |
| 4.108078669                            | 107.5697181                                      | 561.6142578                          | 11571.24425                             | -230.9137848                                |
| 2.821534759                            | 56.06431482                                      | 588.9514618                          | 3143.207396                             | -96.17066498                                |
| 4.163014359                            | 117.3833381                                      | 521.9893684                          | 13778.84806                             | -381.5655527                                |
| 3.833253977                            | 89.26616448                                      | 600.2165527                          | 7968.44812                              | -260.7060455                                |
| 4.529715841                            | 153.5994565                                      | 644.6109924                          | 23592.79304                             | -385.3053131                                |
| 3.568928009                            | 75.48673636                                      | 407.5742035                          | 5698.247367                             | -177.3276337                                |
| 3.228099623                            | 61.22673501                                      | 480.2929535                          | 3748.71308                              | -168.4162445                                |
| 4.030421425                            | 106.2588702                                      | 542.4983368                          | 11290.9475                              | -226.0556885                                |
| 3.412597328                            | 68.28379883                                      | 531.6309204                          | 4662.677183                             | -173.7777908                                |
| 4.317292782                            | 137.1183281                                      | 553.5296936                          | 18801.43589                             | -230.1385651                                |
| 3.405385941                            | 66.75020955                                      | 399.3602829                          | 4455.590475                             | -197.377211                                 |
| 3.818590116                            | 89.92624717                                      | 436.7199535                          | 8086.72993                              | -320.1518463                                |
| 3.306741995                            | 61.29684557                                      | 495.3266144                          | 3757.303276                             | -140.0392242                                |
| 3.306694                               | 74.72503056                                      | 636.3664246                          | 5583.830192                             | -177.2365509                                |
| 3.649178498                            | 89.37222854                                      | 707.6679382                          | 7987.395234                             | -225.4814377                                |
| 3.826662148                            | 91.45926806                                      | 491.284874                           | 8364.797714                             | -265.1302368                                |
| 3.381748981                            | 68.46669423                                      | 484.254425                           | 4687.688219                             | -175.4976501                                |
| 3.260171137                            | 66.59475726                                      | 658.0449829                          | 4434.861695                             | -147.8065002                                |
| 4.0748768                              | 104.9295093                                      | 568.4784393                          | 11010.20191                             | -268.9449402                                |
| 3.189898095                            | 94.77473771                                      | 283.3148499                          | 8982.250908                             | -151.8368134                                |
| 4.019002087                            | 105.517392                                       | 505.9734421                          | 11133.92                                | -321.1887207                                |
| 3.857496369                            | 90.77814786                                      | 531.5246735                          | 8240.67213                              | -290.9692078                                |
| 3.230683073                            | 71.01700495                                      | 536.4051971                          | 5043.414992                             | -166.526123                                 |
| 3.771105177                            | 87.27962798                                      | 500.8973236                          | 7617.73346                              | -192.10858                                  |
| 4.370587992                            | 136.1253207                                      | 627.7478485                          | 18530.10292                             | -313.0488586                                |
| 3.987724142                            | 105.0114868                                      | 450.2990723                          | 11027.41237                             | -323.5192566                                |
| 3.830448504                            | 89.76922116                                      | 566.7746124                          | 8058.513067                             | -225.7885742                                |
| 4.195844578                            | 126.8583673                                      | 596.7560883                          | 16093.04536                             | -380.5403748                                |
| 3.84181392                             | 90.90416352                                      | 523.0807419                          | 8263.566945                             | -334.3262512                                |
| 4.283118902                            | 132.7561613                                      | 652.4676056                          | 17624.19837                             | -372.1657959                                |
| 4.04903375                             | 106.049922                                       | 586.6778564                          | 11246.58596                             | -256.0978882                                |
| 2.753419085                            | 52.26126901                                      | 302.0734253                          | 2731.240239                             | -122.9139512                                |
| 4.123730788                            | 110.4915218                                      | 879.9160156                          | 12208.3764                              | -200.5802383                                |
| 4.007217812                            | 106.5449273                                      | 472.0211716                          | 11351.82153                             | -409.2766785                                |
| 3.152391278                            | 73.45106347                                      | 276.9451904                          | 5395.058724                             | -217.6544525                                |
| 4.589721361                            | 165.9551021                                      | 775.0852814                          | 27541.09593                             | -427.9499207                                |
| 3.456831323                            | 73.64699487                                      | 514.4999695                          | 5423.879854                             | -180.3913773                                |
| 3.668267816                            | 85.37201549                                      | 425.1491966                          | 7288.381028                             | -392.3765015                                |
| 3.794651309                            | 86.20702789                                      | 616.7860107                          | 7431.651658                             | -227.4507416                                |
| 3.873879278                            | 95.07306396                                      | 449.507782                           | 9038.887491                             | -255.9973633                                |
| 2.998938004                            | 62.19875551                                      | 506.7076721                          | 3868.685187                             | -138.3549652                                |
| 4.251195301                            | 122.3811213                                      | 576.6652908                          | 14977.13885                             | -388.8811829                                |
| 3.991059052                            | 98.67639626                                      | 659.5977631                          | 9737.031179                             | -323.3359833                                |
| 4.580987195                            | 154.1272844                                      | 790.5106812                          | 23755.2198                              | -427.1322906                                |
| 4.008873303                            | 102.0348074                                      | 526.4128113                          | 10411.10192                             | -310.6600647                                |
| 3.85718561                             | 93.58429976                                      | 423.5670624                          | 8758.021161                             | -260.3638                                   |
| 3.635039811                            | 79.63846204                                      | 498.4776917                          | 6342.284636                             | -260.4059875                                |
| 3.886949388                            | 97.81375863                                      | 836.5868835                          | 9567.531378                             | -211.2685928                                |
| 3.32572426                             | 63.93279878                                      | 487.7733307                          | 4087.402759                             | -125.374192                                 |
| 3.281160438                            | 61.11820843                                      | 317.3949127                          | 3735.435402                             | -150.7481506                                |
| 3.564803418                            | 81.39714709                                      | 396.5083733                          | 6625.495555                             | -321.6175232                                |
| 3.907350686                            | 92.37363878                                      | 581.8141479                          | 8532.889141                             | -187.8296631                                |
| 4.209664658                            | 126.9602551                                      | 555.5078278                          | 16118.90636                             | -396.5560059                                |
| 3.942273365                            | 101.2706403                                      | 580.070694                           | 10255.7426                              | -245.2606354                                |
| 4.062539124                            | 112.0554013                                      | 495.4596634                          | 12556.41297                             | -473.0319336                                |
| 3.691530678                            | 80.06899223                                      | 471.9706116                          | 6411.043516                             | -212.8621155                                |
| 3.745137686                            | 81.94761139                                      | 511.6150513                          | 6715.411012                             | -218.727832                                 |
| 3.965960124                            | 101.0730957                                      | 577.7539215                          | 10215.77067                             | -346.8030151                                |
| 3.337298977                            | 71.22211725                                      | 486.1392517                          | 5072.589986                             | -171.7465393                                |
| 3.191153344                            | 65.46067925                                      | 397.6577911                          | 4285.100528                             | -155.5400909                                |
| 3.097878868                            | 66.08679764                                      | 650.7006226                          | 4367.464822                             | -128.1232208                                |
| 4.255887533                            | 120.6275398                                      | 575.2682419                          | 14551.00335                             | -389.591095                                 |
| 3.781599214                            | 88.64548929                                      | 482.1094894                          | 7858.022771                             | -340.1859741                                |
| 3.991323995                            | 108.0229584                                      | 477.7511978                          | 11668.95954                             | -395.1799133                                |
| 3.586782151                            | 76.26544417                                      | 401.4143925                          | 5816.417974                             | -314.2028137                                |
| 3.562912616                            | 75.97042339                                      | 605.0614929                          | 5771.50523                              | -205.2124619                                |
| 4.126249321                            | 115.7959073                                      | 522.8718643                          | 13408.69215                             | -481.5046875                                |
| 4.046021878                            | 81.6333569                                       | 609.0400696                          | 10329.33923                             | -278.2008972                                |
| 3.619100331                            | 81.34962584                                      | 690.9875488                          | 6617.761625                             | -171.7122162                                |
| 2.9938447                              | 59.36580913                                      | 248.7767677                          | 3524.299294                             | -141.3892975                                |
| 3.323102494                            | 63.90907886                                      | 487.1903534                          | 4084.370361                             | -155.5914063                                |
| 3.439963285                            | 66.78400307                                      | 444.0151798                          | 4460.103065                             | -152.2469971                                |
| 3.952068085                            | 104.6282654                                      | 562.3903351                          | 10947.07393                             | -332.2627808                                |
| 4.414382055                            | 132.9381819                                      | 781.8753357                          | 17672.56021                             | -430.4568604                                |
| 3.121624105                            | 61.40920587                                      | 267.7651367                          | 3771.090566                             | -140.2554626                                |
| 3.026986833                            | 67.96161497                                      | 241.0276923                          | 4618.781109                             | -209.7465912                                |
| 3.839493533                            | 95.87995969                                      | 743.2430115                          | 9192.96667                              | -220.7995667                                |
| 3.927551841                            | 110.9506305                                      | 564.0138092                          | 12310.04241                             | -357.8734833                                |
| 3.528597956                            | 72.25240191                                      | 353.694191                           | 5220.409582                             | -224.7658539                                |
| 3.702986266                            | 80.77455346                                      | 459.0760651                          | 6524.528486                             | -203.1481354                                |
| 3.417905322                            | 73.44659018                                      | 480.7662811                          | 5394.401609                             | -168.1391296                                |
| 4.195711178                            | 131.2315127                                      | 598.056282                           | 17221.70993                             | -405.8102966                                |
| 4.244764288                            | 120.0489015                                      | 608.9379272                          | 14411.73876                             | -296.882312                                 |
| 2.804585169                            | 50.13601665                                      | 169.7704887                          | 2513.620166                             | -154.3473434                                |
| 4.186178686                            | 125.4211443                                      | 515.1948547                          | 15730.46343                             | -265.6064453                                |
| 3.996674426                            | 104.2113332                                      | 527.5229645                          | 10860.00198                             | -260.8696747                                |

| log.sigma.5.0.mm.3D_firstorder_Kurtosis | log.sigma.5.0.mm.3D_firstorder_Mean | log.sigma.5.0.mm.3D_glrIm_ShortRunLowGrayLevelEmphasis | log.sigma.5.0.mm.3D_glrIm_GrayLevelVariance |
|-----------------------------------------|-------------------------------------|--------------------------------------------------------|---------------------------------------------|
| 2.221962328                             | -170.2022403                        | 0.031698363                                            | 23.39476458                                 |
| 2.585761402                             | -110.1998281                        | 0.02000974                                             | 10.7933607                                  |
| 2.633082279                             | -185.395722                         | 0.038376993                                            | 10.92503276                                 |
| 2.982704305                             | -107.4106961                        | 0.009544656                                            | 19.70686073                                 |
| 2.171662359                             | -174.3822477                        | 0.034178988                                            | 41.59764272                                 |
| 2.141725798                             | -263.3715201                        | 0.042650597                                            | 12.60890014                                 |
| 2.987673562                             | -66.78486278                        | 0.123982905                                            | 7.269344541                                 |
| 2.802955404                             | -234.1851116                        | 0.039747288                                            | 29.07748816                                 |
| 2.688134345                             | -28.16893426                        | 0.006481854                                            | 76.5619217                                  |
| 2.890353731                             | -102.5843333                        | 0.012997996                                            | 10.33187597                                 |
| 2.302501923                             | -246.4134374                        | 0.055046655                                            | 15.58360331                                 |
| 2.581473136                             | -126.3388604                        | 0.023805855                                            | 15.14072181                                 |
| 4.151963244                             | -125.0978124                        | 0.061185364                                            | 14.82500816                                 |
| 2.232906607                             | -151.3302767                        | 0.021058435                                            | 20.78141892                                 |
| 2.718452994                             | -93.65716541                        | 0.019906594                                            | 18.85900041                                 |
| 7.463525957                             | -19.7533373                         | 0.004826398                                            | 7.785274745                                 |
| 2.314303724                             | -224.9591796                        | 0.029943594                                            | 21.68078251                                 |
| 3.714578448                             | -151.0497653                        | 0.03274576                                             | 13.45655483                                 |
| 2.222345751                             | -176.2721765                        | 0.027014849                                            | 37.92259532                                 |
| 2.170283041                             | -70.01179143                        | 0.022708669                                            | 8.994521943                                 |
| 2.950007898                             | -83.66219749                        | 0.012954234                                            | 5.93657045                                  |
| 3.013422539                             | -106.8225115                        | 0.028561647                                            | 18.53257079                                 |
| 3.957049004                             | -88.45504253                        | 0.00742111                                             | 7.882824986                                 |
| 1.90620378                              | -49.64115498                        | 0.045208323                                            | 30.11616798                                 |
| 2.957944237                             | -101.6370435                        | 0.022693931                                            | 7.499883074                                 |
| 2.636127848                             | -201.9391948                        | 0.027080263                                            | 13.01048368                                 |
| 3.979341102                             | -62.87054032                        | 0.01420848                                             | 6.887750168                                 |
| 3.394861141                             | -76.93669391                        | 0.013706686                                            | 9.173346018                                 |
| 3.045979052                             | -97.31396704                        | 0.008733338                                            | 13.1067029                                  |
| 2.315223376                             | -134.864866                         | 0.016668389                                            | 13.23095846                                 |
| 2.97318303                              | -80.6910409                         | 0.012655837                                            | 7.737251239                                 |
| 4.354690101                             | -53.75469146                        | 0.007924951                                            | 8.681061879                                 |
| 2.674808638                             | -134.3895914                        | 0.021603552                                            | 17.99282674                                 |
| 1.603335401                             | -25.18667234                        | 0.168394149                                            | 14.27880167                                 |
| 2.473260075                             | -172.4291778                        | 0.028026587                                            | 18.2409427                                  |
| 3.095974776                             | -188.7820879                        | 0.016288756                                            | 13.69749988                                 |
| 3.44921223                              | -55.78309729                        | 0.01221114                                             | 8.995953308                                 |
| 2.229173605                             | -73.48319395                        | 0.01894942                                             | 12.55387734                                 |
| 2.26819946                              | -122.7583703                        | 0.016215376                                            | 29.36970429                                 |
| 2.006324051                             | -185.0012413                        | 0.029104877                                            | 17.58753721                                 |
| 2.881097772                             | -103.9135577                        | 0.011149283                                            | 13.25685876                                 |
| 2.859857493                             | -235.3192481                        | 0.039554671                                            | 26.09092217                                 |
| 2.67497183                              | -224.1285785                        | 0.026737475                                            | 13.62533337                                 |
| 2.506619711                             | -208.1946065                        | 0.056320302                                            | 27.97439096                                 |
| 3.19832304                              | -133.87028                          | 0.018189912                                            | 18.53041191                                 |
| 3.231717143                             | -39.16131135                        | 0.016057795                                            | 4.909767876                                 |
| 4.921581399                             | -63.57923116                        | 0.011744956                                            | 20.1345295                                  |
| 2.217354944                             | -271.3127295                        | 0.045209912                                            | 18.13713931                                 |
| 2.394085888                             | -115.2777817                        | 0.131040118                                            | 8.59353951                                  |
| 2.287781995                             | -184.0349362                        | 0.016703335                                            | 44.24012899                                 |
| 2.842728717                             | -76.41757071                        | 0.010656032                                            | 9.19443776                                  |
| 2.717631504                             | -298.5918178                        | 0.029729988                                            | 11.97640895                                 |
| 2.818302378                             | -110.5494643                        | 0.013677207                                            | 12.07185041                                 |
| 2.432537504                             | -118.6513466                        | 0.025068585                                            | 14.55147874                                 |
| 3.835108935                             | -37.14660387                        | 0.011051776                                            | 7.665694952                                 |
| 2.370753126                             | -239.0437672                        | 0.018101296                                            | 23.42093125                                 |
| 3.020878153                             | -196.5637858                        | 0.015970818                                            | 15.78959727                                 |
| 2.821117105                             | -200.0044101                        | 0.013146105                                            | 37.97116058                                 |
| 2.791494071                             | -178.5749749                        | 0.028406027                                            | 17.05652359                                 |
| 2.181414685                             | -133.1013866                        | 0.043121431                                            | 13.81018226                                 |
| 3.424539573                             | -169.6099158                        | 0.030247732                                            | 10.44297568                                 |
| 3.71202374                              | -77.80255793                        | 0.005564529                                            | 16.95152587                                 |
| 2.925414175                             | -31.4974985                         | 0.024953136                                            | 7.20457911                                  |
| 2.181643947                             | -69.59717901                        | 0.026914811                                            | 5.931425413                                 |
| 2.79373649                              | -216.0955774                        | 0.047898588                                            | 10.64723163                                 |
| 3.203622559                             | -67.57095368                        | 0.018368273                                            | 13.96416635                                 |
| 2.413105048                             | -229.6776665                        | 0.037944709                                            | 25.65695193                                 |
| 2.259636655                             | -102.5097646                        | 0.020653785                                            | 16.43802885                                 |
| 2.413495333                             | -324.9369152                        | 0.028528653                                            | 19.9805174                                  |
| 2.425327638                             | -106.3534978                        | 0.014095472                                            | 10.22390073                                 |
| 2.688727794                             | -110.6106308                        | 0.01625809                                             | 11.05151317                                 |
| 3.388236377                             | -229.4290354                        | 0.021680815                                            | 16.84169264                                 |
| 2.645118564                             | -63.77690201                        | 0.011759883                                            | 8.344098215                                 |
| 2.595346754                             | -53.23336911                        | 0.029726452                                            | 7.221176177                                 |
| 5.050494771                             | -27.45529915                        | 0.007916946                                            | 9.487208682                                 |
| 2.292554208                             | -233.7992194                        | 0.025370364                                            | 23.15498127                                 |
| 2.519409673                             | -231.4605893                        | 0.026551752                                            | 12.62177398                                 |
| 2.613207151                             | -257.0086149                        | 0.037861841                                            | 18.32739189                                 |
| 3.058240848                             | -220.444114                         | 0.058138786                                            | 9.779933389                                 |
| 3.197729558                             | -105.2853452                        | 0.006143787                                            | 9.327034302                                 |
| 2.36581632                              | -340.3612925                        | 0.019346581                                            | 21.51794405                                 |
| 3.069331957                             | -149.4218455                        | 0.013512709                                            | 17.2738085                                  |
| 3.809444052                             | -55.25026022                        | 0.008188968                                            | 11.50146536                                 |
| 2.379095503                             | -69.33018063                        | 0.081661471                                            | 5.859965369                                 |
| 3.007730643                             | -64.26283596                        | 0.013123644                                            | 7.014706509                                 |
| 3.037908531                             | -69.02132937                        | 0.015611946                                            | 7.540258283                                 |
| 3.156878813                             | -209.7402132                        | 0.039584614                                            | 17.80313388                                 |
| 2.885719875                             | -269.3120572                        | 0.009816591                                            | 28.49740184                                 |
| 2.360616455                             | -75.24170537                        | 0.052833806                                            | 6.65732529                                  |
| 2.424584004                             | -139.7045758                        | 0.138722819                                            | 6.452775723                                 |
| 3.192987467                             | -90.39774338                        | 0.006776087                                            | 15.15470134                                 |
| 3.448863304                             | -235.8620152                        | 0.074075023                                            | 19.96736689                                 |
| 2.57077163                              | -132.1373872                        | 0.064097866                                            | 8.612275909                                 |
| 2.375612431                             | -92.9444389                         | 0.018192273                                            | 10.29518487                                 |
| 2.491645899                             | -58.45555928                        | 0.01429272                                             | 9.553005188                                 |
| 2.491369636                             | -229.6661834                        | 0.0247992                                              | 27.90565174                                 |
| 2.623578772                             | -135.7066392                        | 0.016222115                                            | 23.25843399                                 |
| 2.307737354                             | -98.48436344                        | 0.237993623                                            | 4.345695314                                 |
| 2.154836378                             | -106.0022114                        | 0.023727365                                            | 25.30886769                                 |
| 2.570844913                             | -112.6298551                        | 0.041007056                                            | 17.98336762                                 |

| log.sigma.5.0.mm.3D_glrIm_LowGrayLevelRunEmphasis | log.sigma.5.0.mm.3D_glrIm_GrayLevelNonUniformityNormalized | log.sigma.5.0.mm.3D_glrIm_RunVariance | log.sigma.5.0.mm.3D_glrIm_GrayLevelNonUniformity |
|---------------------------------------------------|------------------------------------------------------------|---------------------------------------|--------------------------------------------------|
| 0.035682803                                       | 0.05719184                                                 | 0.104073389                           | 18.81123836                                      |
| 0.022545327                                       | 0.085580577                                                | 0.35897463                            | 98.05258884                                      |
| 0.041162218                                       | 0.089018767                                                | 0.09844215                            | 14.56073                                         |
| 0.010438573                                       | 0.064080115                                                | 0.204071179                           | 108.4159528                                      |
| 0.036042372                                       | 0.049757038                                                | 0.043739691                           | 4.804153115                                      |
| 0.048041957                                       | 0.078566414                                                | 0.091554866                           | 17.62661246                                      |
| 0.140702267                                       | 0.12658288                                                 | 0.082342387                           | 8.16516864                                       |
| 0.043970375                                       | 0.05523355                                                 | 0.072493859                           | 20.76630607                                      |
| 0.006877528                                       | 0.035955814                                                | 0.095586866                           | 49.12808659                                      |
| 0.014915012                                       | 0.087378665                                                | 0.360712386                           | 164.6334036                                      |
| 0.064017734                                       | 0.071901871                                                | 0.147187926                           | 24.30004508                                      |
| 0.02625734                                        | 0.071313865                                                | 0.179017097                           | 47.64080525                                      |
| 0.07217723                                        | 0.086545327                                                | 0.24744389                            | 100.7553919                                      |
| 0.023158366                                       | 0.060942667                                                | 0.104739519                           | 29.48481923                                      |
| 0.021407147                                       | 0.065637914                                                | 0.092180804                           | 22.17140847                                      |
| 0.006465845                                       | 0.133701309                                                | 3.941302125                           | 728.0975922                                      |
| 0.032529965                                       | 0.062556769                                                | 0.06147598                            | 12.81712451                                      |
| 0.038094126                                       | 0.080933925                                                | 0.232247636                           | 107.6781248                                      |
| 0.028599721                                       | 0.048494904                                                | 0.049380928                           | 8.404962529                                      |
| 0.026457815                                       | 0.091418611                                                | 0.613868788                           | 195.0845049                                      |
| 0.015319853                                       | 0.117887972                                                | 1.157859585                           | 414.2363982                                      |
| 0.033009233                                       | 0.070103492                                                | 0.205082708                           | 56.15350458                                      |
| 0.008655737                                       | 0.108059535                                                | 0.643792416                           | 235.457269                                       |
| 0.048152024                                       | 0.053508461                                                | 0.055030228                           | 6.757866315                                      |
| 0.026173072                                       | 0.106150508                                                | 0.363320799                           | 82.35661236                                      |
| 0.029329764                                       | 0.081229234                                                | 0.107153342                           | 22.55921818                                      |
| 0.016897334                                       | 0.113354561                                                | 0.681271659                           | 193.7018388                                      |
| 0.016125466                                       | 0.09943315                                                 | 1.573717876                           | 255.1875074                                      |
| 0.009945475                                       | 0.083338038                                                | 1.002742097                           | 228.9409388                                      |
| 0.018506774                                       | 0.076359087                                                | 0.420298657                           | 104.1994502                                      |
| 0.015162762                                       | 0.10524241                                                 | 1.021908947                           | 312.4639117                                      |
| 0.00968454                                        | 0.106828525                                                | 1.940660716                           | 603.7589002                                      |
| 0.02378471                                        | 0.065870534                                                | 0.190319489                           | 80.59576562                                      |
| 0.173282313                                       | 0.118726464                                                | 0.030421818                           | 1.726458157                                      |
| 0.029006395                                       | 0.069466721                                                | 0.050245491                           | 7.465462915                                      |
| 0.018074519                                       | 0.0792963                                                  | 0.169279009                           | 93.6222689                                       |
| 0.014540578                                       | 0.105274272                                                | 1.895872262                           | 443.5542515                                      |
| 0.021878357                                       | 0.078168488                                                | 0.533325246                           | 186.0249566                                      |
| 0.017159476                                       | 0.054459932                                                | 0.080264345                           | 16.31860539                                      |
| 0.03219059                                        | 0.0668319                                                  | 0.142471427                           | 32.15917909                                      |
| 0.012007983                                       | 0.079875332                                                | 0.224264021                           | 49.62986723                                      |
| 0.043989379                                       | 0.061160969                                                | 0.115802583                           | 21.34857257                                      |
| 0.02949711                                        | 0.076503545                                                | 0.146728974                           | 56.65322367                                      |
| 0.063974066                                       | 0.055499499                                                | 0.10371476                            | 22.49989363                                      |
| 0.020165024                                       | 0.069131812                                                | 0.180289457                           | 67.83631286                                      |
| 0.020969428                                       | 0.142778299                                                | 2.617491411                           | 481.2661636                                      |
| 0.012933603                                       | 0.066534851                                                | 0.164938428                           | 161.9162669                                      |
| 0.051412283                                       | 0.067575024                                                | 0.095248223                           | 14.19478843                                      |
| 0.135981943                                       | 0.123884095                                                | 0.026381841                           | 2.650046032                                      |
| 0.016999033                                       | 0.046797094                                                | 0.037315794                           | 6.576807019                                      |
| 0.012434942                                       | 0.094656292                                                | 1.17148556                            | 273.2340605                                      |
| 0.034067998                                       | 0.086610115                                                | 0.166791536                           | 30.80838978                                      |
| 0.015264788                                       | 0.081453974                                                | 0.323274098                           | 217.0249491                                      |
| 0.026917846                                       | 0.077892531                                                | 0.098085871                           | 17.15227766                                      |
| 0.013738916                                       | 0.116866046                                                | 2.980847841                           | 760.6284844                                      |
| 0.019564295                                       | 0.058594108                                                | 0.070513212                           | 18.45392299                                      |
| 0.017124961                                       | 0.071723795                                                | 0.097893632                           | 58.03246991                                      |
| 0.01383535                                        | 0.047948293                                                | 0.054620201                           | 20.93156042                                      |
| 0.031149437                                       | 0.070337173                                                | 0.121639102                           | 22.6106574                                       |
| 0.051156975                                       | 0.074945697                                                | 0.202944368                           | 30.69430957                                      |
| 0.034211111                                       | 0.092914973                                                | 0.203332805                           | 116.9078838                                      |
| 0.006378753                                       | 0.074166643                                                | 0.902793143                           | 376.3604856                                      |
| 0.030086873                                       | 0.10678403                                                 | 0.896484594                           | 314.2581012                                      |
| 0.030746304                                       | 0.112456879                                                | 0.564355093                           | 155.7332219                                      |
| 0.049073281                                       | 0.093431831                                                | 0.043334431                           | 4.735876173                                      |
| 0.020280124                                       | 0.078239203                                                | 0.176983045                           | 80.09501836                                      |
| 0.039551531                                       | 0.060510834                                                | 0.037258492                           | 6.116452367                                      |
| 0.023482775                                       | 0.069764918                                                | 0.512769108                           | 193.4559883                                      |
| 0.030454042                                       | 0.068532063                                                | 0.051539652                           | 9.304873796                                      |
| 0.015901528                                       | 0.086225488                                                | 0.335463569                           | 127.7225045                                      |
| 0.018170242                                       | 0.083715929                                                | 0.312502419                           | 181.8518626                                      |
| 0.024193347                                       | 0.07338095                                                 | 0.145042211                           | 37.09671026                                      |
| 0.014053634                                       | 0.101240935                                                | 1.409608104                           | 481.449649                                       |
| 0.035902453                                       | 0.10454341                                                 | 2.437083613                           | 679.1743165                                      |
| 0.009853607                                       | 0.111210522                                                | 3.256686372                           | 920.8534841                                      |
| 0.028506687                                       | 0.057539089                                                | 0.077305847                           | 24.02323854                                      |
| 0.029519234                                       | 0.078656178                                                | 0.133613701                           | 32.58213004                                      |
| 0.043354362                                       | 0.068610732                                                | 0.09340778                            | 14.17962298                                      |
| 0.064851279                                       | 0.093029402                                                | 0.196918854                           | 73.78221727                                      |
| 0.00697769                                        | 0.094938279                                                | 0.68089616                            | 196.4254815                                      |
| 0.019982137                                       | 0.06475713                                                 | 0.047405376                           | 9.211536929                                      |
| 0.01465026                                        | 0.070029728                                                | 0.150051219                           | 54.20885365                                      |
| 0.009553177                                       | 0.091124849                                                | 0.833837417                           | 336.7510783                                      |
| 0.08405658                                        | 0.14416986                                                 | 0.058815399                           | 4.204696618                                      |
| 0.015616174                                       | 0.109252786                                                | 0.99763649                            | 387.7366786                                      |
| 0.018230584                                       | 0.103281372                                                | 0.351437981                           | 296.833469                                       |
| 0.044492873                                       | 0.071854951                                                | 0.120869458                           | 23.80279265                                      |
| 0.010262653                                       | 0.054018941                                                | 0.069537542                           | 29.95592642                                      |
| 0.055331659                                       | 0.128217088                                                | 0.096049295                           | 5.882594524                                      |
| 0.141435493                                       | 0.13401956                                                 | 0.038194444                           | 1.676282051                                      |
| 0.007594654                                       | 0.077949808                                                | 0.640482398                           | 207.7648586                                      |
| 0.082442195                                       | 0.074320696                                                | 0.13217685                            | 20.55836237                                      |
| 0.07487021                                        | 0.094860586                                                | 0.185821429                           | 34.5592533                                       |
| 0.020837383                                       | 0.085529091                                                | 0.571728391                           | 242.2370382                                      |
| 0.017088466                                       | 0.09060433                                                 | 1.726049747                           | 427.1560472                                      |
| 0.024973992                                       | 0.062198547                                                | 0.035527863                           | 3.789114924                                      |
| 0.017669376                                       | 0.059935843                                                | 0.117612281                           | 37.22691894                                      |
| 0.251541238                                       | 0.155424795                                                | 0.069116771                           | 3.527379143                                      |
| 0.024583834                                       | 0.061538352                                                | 0.058788751                           | 9.469629075                                      |
| 0.04382214                                        | 0.069205393                                                | 0.138157521                           | 17.46233859                                      |

| log.sigma.5.0.mm.3D_glrIm_LongRunEmphasis | log.sigma.5.0.mm.3D_glrIm_ShortRunHighGrayLevelEmphasis | log.sigma.5.0.mm.3D_glrIm_RunLengthNonUniformity | log.sigma.5.0.mm.3D_glrIm_ShortRunEmphasis |
|-------------------------------------------|---------------------------------------------------------|--------------------------------------------------|--------------------------------------------|
| 1.310657262                               | 131.5060218                                             | 274.4786761                                      | 0.930610036                                |
| 1.874420663                               | 94.60212616                                             | 823.6430326                                      | 0.86971825                                 |
| 1.278629435                               | 74.80201795                                             | 141.4859922                                      | 0.942109342                                |
| 1.51458234                                | 181.0763608                                             | 1344.891183                                      | 0.91078187                                 |
| 1.143621636                               | 198.1654016                                             | 88.36283118                                      | 0.964094591                                |
| 1.275782151                               | 75.7021815                                              | 190.5123175                                      | 0.937310811                                |
| 1.278149171                               | 31.15921262                                             | 55.14146681                                      | 0.93351521                                 |
| 1.212595465                               | 132.2568482                                             | 332.579898                                       | 0.952525799                                |
| 1.263931716                               | 423.9856994                                             | 1184.679977                                      | 0.945236303                                |
| 1.886116597                               | 104.0985176                                             | 1333.374463                                      | 0.865166863                                |
| 1.390785749                               | 75.85272158                                             | 280.3493065                                      | 0.926729716                                |
| 1.474998379                               | 97.8471003                                              | 537.0455553                                      | 0.913309318                                |
| 1.634920766                               | 57.42510709                                             | 882.7692867                                      | 0.892096346                                |
| 1.297854192                               | 128.7694765                                             | 411.2305142                                      | 0.937239165                                |
| 1.255709202                               | 131.8557631                                             | 293.9986145                                      | 0.946575123                                |
| 8.129059568                               | 137.0071441                                             | 2321.021455                                      | 0.673270917                                |
| 1.185316838                               | 132.6013039                                             | 183.4724824                                      | 0.95709774                                 |
| 1.59946007                                | 81.73936115                                             | 1017.796912                                      | 0.895933377                                |
| 1.153548934                               | 214.8135235                                             | 157.2009373                                      | 0.962615357                                |
| 2.338629346                               | 66.41547727                                             | 1438.921763                                      | 0.842993064                                |
| 3.286069                                  | 77.93860603                                             | 2108.19707                                       | 0.799329013                                |
| 1.511654768                               | 101.9044925                                             | 647.1831465                                      | 0.914354425                                |
| 2.47168865                                | 136.7289132                                             | 1380.442282                                      | 0.820413784                                |
| 1.166410345                               | 154.4005372                                             | 114.3395041                                      | 0.961166266                                |
| 1.917732519                               | 67.05570934                                             | 543.1783764                                      | 0.859175929                                |
| 1.294732218                               | 100.477084                                              | 237.9288088                                      | 0.939972334                                |
| 2.501678465                               | 87.90791302                                             | 1092.986432                                      | 0.824743497                                |
| 3.949475501                               | 92.51373174                                             | 1496.570383                                      | 0.786993503                                |
| 2.895860253                               | 149.644541                                              | 1834.608324                                      | 0.838957441                                |
| 1.971926671                               | 109.8005567                                             | 976.3444512                                      | 0.867916098                                |
| 3.063456211                               | 83.73914998                                             | 1813.327026                                      | 0.806517898                                |
| 4.455282271                               | 116.810109                                              | 3207.360794                                      | 0.778688558                                |
| 1.482421682                               | 113.1303119                                             | 982.641446                                       | 0.91505151                                 |
| 1.101437025                               | 55.73021274                                             | 13.70667794                                      | 0.974640744                                |
| 1.158887198                               | 128.4612224                                             | 97.27216689                                      | 0.961116143                                |
| 1.450044509                               | 108.5319107                                             | 948.1180396                                      | 0.915139701                                |
| 4.507659104                               | 86.23051013                                             | 2323.299616                                      | 0.767407955                                |
| 2.176033661                               | 86.54828826                                             | 1646.695273                                      | 0.854913139                                |
| 1.232754626                               | 205.1409217                                             | 263.0420416                                      | 0.94918573                                 |
| 1.392632642                               | 96.0500361                                              | 394.7022887                                      | 0.92277501                                 |
| 1.562838271                               | 148.4060281                                             | 488.1547024                                      | 0.904994489                                |
| 1.309707084                               | 111.2935792                                             | 298.2819114                                      | 0.93921083                                 |
| 1.390465513                               | 86.55233586                                             | 612.785488                                       | 0.926096309                                |
| 1.27875863                                | 113.2210833                                             | 351.454877                                       | 0.944656851                                |
| 1.477578291                               | 117.0860108                                             | 782.4859606                                      | 0.911948956                                |
| 6.120611219                               | 46.45969509                                             | 1539.638244                                      | 0.691773494                                |
| 1.441853774                               | 154.2888765                                             | 1958.822908                                      | 0.915942691                                |
| 1.278219102                               | 92.8236853                                              | 180.3443336                                      | 0.940250605                                |
| 1.101939237                               | 42.8488962                                              | 20.41818574                                      | 0.974515191                                |
| 1.117410031                               | 299.3428852                                             | 130.1202174                                      | 0.970647492                                |
| 3.214105848                               | 104.4503549                                             | 1826.375732                                      | 0.819164745                                |
| 1.456367618                               | 70.17347663                                             | 284.2038472                                      | 0.912493015                                |
| 1.774467994                               | 116.6245604                                             | 1980.92243                                       | 0.883400974                                |
| 1.279445903                               | 105.3575744                                             | 188.9831497                                      | 0.940906828                                |
| 6.111882977                               | 81.21967372                                             | 3327.934008                                      | 0.740711499                                |
| 1.204544115                               | 164.9793263                                             | 280.2722187                                      | 0.95472607                                 |
| 1.263449074                               | 126.8924342                                             | 706.6719794                                      | 0.947176085                                |
| 1.156481734                               | 335.0044542                                             | 398.0783383                                      | 0.964699578                                |
| 1.341983627                               | 101.6597693                                             | 269.3428633                                      | 0.930490494                                |
| 1.54256925                                | 76.77898503                                             | 328.8870479                                      | 0.908610178                                |
| 1.545221749                               | 65.84000143                                             | 970.1126404                                      | 0.899327693                                |
| 2.72349893                                | 201.3953669                                             | 3383.649954                                      | 0.841367347                                |
| 2.923956621                               | 57.82426507                                             | 1818.213314                                      | 0.805258267                                |
| 2.24624114                                | 52.368323                                               | 944.5779465                                      | 0.847883097                                |
| 1.138920083                               | 71.43706468                                             | 46.37004805                                      | 0.965269979                                |
| 1.454263554                               | 122.0693518                                             | 834.830122                                       | 0.919525297                                |
| 1.117509564                               | 152.1539445                                             | 93.61028488                                      | 0.970622609                                |
| 2.091420481                               | 101.3413522                                             | 1986.618024                                      | 0.869088705                                |
| 1.161982242                               | 129.5312031                                             | 122.2915927                                      | 0.960156883                                |
| 1.815363708                               | 99.61919009                                             | 1082.643043                                      | 0.876165955                                |
| 1.759710843                               | 98.4620047                                              | 1618.870811                                      | 0.883807256                                |
| 1.40639383                                | 101.4594425                                             | 409.4904885                                      | 0.918544478                                |
| 3.677805072                               | 86.85007317                                             | 2785.658053                                      | 0.790752306                                |
| 5.266632027                               | 46.23667059                                             | 3514.104647                                      | 0.76114577                                 |
| 6.409544001                               | 110.3668641                                             | 4342.066838                                      | 0.75039919                                 |
| 1.221823339                               | 145.684199                                              | 369.238356                                       | 0.951849857                                |
| 1.353278546                               | 81.25781632                                             | 350.3484349                                      | 0.933741204                                |
| 1.271538399                               | 87.70853606                                             | 177.8171778                                      | 0.941549322                                |
| 1.532753936                               | 51.66158114                                             | 619.4780746                                      | 0.902426043                                |
| 2.406675443                               | 171.9940335                                             | 1416.508646                                      | 0.850808734                                |
| 1.148238774                               | 160.0252006                                             | 129.8835762                                      | 0.964193978                                |
| 1.403913851                               | 143.5467353                                             | 633.8119195                                      | 0.922405703                                |
| 2.66773187                                | 148.5060307                                             | 2440.128245                                      | 0.836377849                                |
| 1.195951264                               | 37.66070991                                             | 25.81889022                                      | 0.951012184                                |
| 2.995684177                               | 80.05419267                                             | 2210.998056                                      | 0.814246988                                |
| 1.856859931                               | 76.96500212                                             | 2066.944459                                      | 0.870179088                                |
| 1.33996745                                | 83.58626811                                             | 277.4358612                                      | 0.930947774                                |
| 1.199316145                               | 270.7486848                                             | 494.6063617                                      | 0.956024304                                |
| 1.29569744                                | 46.97199957                                             | 38.94912465                                      | 0.934220265                                |
| 1.125                                     | 30.09815705                                             | 11.58333333                                      | 0.96875                                    |
| 2.317332128                               | 190.011957                                              | 1868.071439                                      | 0.85926421                                 |
| 1.350550514                               | 69.95109561                                             | 234.6992879                                      | 0.934497602                                |
| 1.503337811                               | 45.29353599                                             | 287.6940032                                      | 0.906367828                                |
| 2.257994761                               | 83.74655177                                             | 1920.123557                                      | 0.846880478                                |
| 4.125044833                               | 77.34804311                                             | 2754.594842                                      | 0.789668211                                |
| 1.106171695                               | 226.0679333                                             | 57.08520591                                      | 0.974930698                                |
| 1.320072071                               | 164.894468                                              | 526.9834173                                      | 0.936287948                                |
| 1.19562177                                | 16.88564998                                             | 20.56071754                                      | 0.959641566                                |
| 1.183995446                               | 146.7572424                                             | 137.2868857                                      | 0.955668001                                |
| 1.376859329                               | 108.874747                                              | 208.5240689                                      | 0.925532929                                |

| log.sigma.5.0.mm.3D_glrIm_LongRunHighGrayLevelEmphasis | log.sigma.5.0.mm.3D_glrIm_RunPercentage | log.sigma.5.0.mm.3D_glrIm_LongRunLowGrayLevelEmphasis | log.sigma.5.0.mm.3D_glrIm_RunEntropy |
|--------------------------------------------------------|-----------------------------------------|-------------------------------------------------------|--------------------------------------|
| 177.9133559                                            | 0.911144257                             | 0.052283277                                           | 4.639370443                          |
| 222.5306516                                            | 0.81654696                              | 0.036520207                                           | 4.49076537                           |
| 93.96628183                                            | 0.92394611                              | 0.053472528                                           | 3.998308427                          |
| 285.3371765                                            | 0.875203948                             | 0.015338321                                           | 4.745968097                          |
| 219.6571886                                            | 0.955826352                             | 0.043495909                                           | 4.594990921                          |
| 92.82435801                                            | 0.919609079                             | 0.07227017                                            | 4.141150306                          |
| 36.41375034                                            | 0.920879121                             | 0.20863961                                            | 3.481590575                          |
| 151.309414                                             | 0.93765586                              | 0.062631256                                           | 4.638738796                          |
| 582.8252495                                            | 0.925682718                             | 0.008691732                                           | 5.352954837                          |
| 220.0036211                                            | 0.812419146                             | 0.026368759                                           | 4.525701144                          |
| 91.62871463                                            | 0.898731588                             | 0.111439347                                           | 4.326902225                          |
| 147.9915672                                            | 0.882430647                             | 0.039033136                                           | 4.473524134                          |
| 79.61817779                                            | 0.851897736                             | 0.132357178                                           | 4.433559351                          |
| 158.8713041                                            | 0.916375291                             | 0.032776623                                           | 4.536799994                          |
| 161.8700095                                            | 0.927937447                             | 0.02822079                                            | 4.442597252                          |
| 1882.965711                                            | 0.500760138                             | 0.038149802                                           | 5.039851865                          |
| 152.9437203                                            | 0.944345977                             | 0.043914281                                           | 4.388006975                          |
| 124.9978868                                            | 0.856958763                             | 0.066457907                                           | 4.502183154                          |
| 246.8193558                                            | 0.952240068                             | 0.034960361                                           | 4.720578191                          |
| 216.7668676                                            | 0.769203039                             | 0.052858444                                           | 4.498098921                          |
| 410.3652538                                            | 0.692034862                             | 0.036152203                                           | 4.417524723                          |
| 142.7090921                                            | 0.880934247                             | 0.057282805                                           | 4.573808338                          |
| 459.842523                                             | 0.745837724                             | 0.017532479                                           | 4.487528638                          |
| 191.551791                                             | 0.949681897                             | 0.060068208                                           | 4.491357697                          |
| 151.6655718                                            | 0.807612179                             | 0.046159916                                           | 4.259901541                          |
| 127.2588287                                            | 0.919510953                             | 0.039356748                                           | 4.179873872                          |
| 268.3483776                                            | 0.745807709                             | 0.035381967                                           | 4.41720095                           |
| 638.1743143                                            | 0.658141602                             | 0.039033171                                           | 4.660863266                          |
| 653.3413946                                            | 0.737766001                             | 0.020091222                                           | 4.727704253                          |
| 298.0360393                                            | 0.806261075                             | 0.028997395                                           | 4.631269984                          |
| 387.8379238                                            | 0.706406899                             | 0.03553052                                            | 4.561200498                          |
| 771.8234787                                            | 0.638453701                             | 0.03131052                                            | 4.791157005                          |
| 174.361263                                             | 0.880932602                             | 0.035050292                                           | 4.6340751                            |
| 64.64874613                                            | 0.969230769                             | 0.19283497                                            | 3.232182619                          |
| 148.549845                                             | 0.950987066                             | 0.03293872                                            | 4.215849387                          |
| 153.5054343                                            | 0.884961365                             | 0.02708047                                            | 4.417171634                          |
| 702.1969859                                            | 0.628007772                             | 0.040190748                                           | 4.7448197                            |
| 236.2233971                                            | 0.785036533                             | 0.042112284                                           | 4.681324939                          |
| 262.1818852                                            | 0.93338126                              | 0.021163772                                           | 4.671437496                          |
| 134.7372714                                            | 0.896146684                             | 0.047642841                                           | 4.460710439                          |
| 261.831398                                             | 0.868423884                             | 0.01668439                                            | 4.433079299                          |
| 128.5549938                                            | 0.916010499                             | 0.065714159                                           | 4.575308554                          |
| 110.7036858                                            | 0.898618372                             | 0.043512088                                           | 4.324882223                          |
| 132.486627                                             | 0.92342737                              | 0.102641397                                           | 4.627433863                          |
| 168.0827282                                            | 0.879751638                             | 0.0302745                                             | 4.62390053                           |
| 589.1312415                                            | 0.548903073                             | 0.082095137                                           | 4.587315693                          |
| 226.3370751                                            | 0.886212113                             | 0.018900172                                           | 4.687524652                          |
| 110.8860043                                            | 0.921390013                             | 0.078629026                                           | 4.328604872                          |
| 46.2029686                                             | 0.972027972                             | 0.155749242                                           | 3.184210163                          |
| 335.2594606                                            | 0.962592202                             | 0.018181825                                           | 4.75365879                           |
| 505.5950024                                            | 0.706523379                             | 0.028786138                                           | 4.638342532                          |
| 89.61291536                                            | 0.882420309                             | 0.05672142                                            | 4.188178721                          |
| 246.5278618                                            | 0.833899121                             | 0.024446039                                           | 4.540318751                          |
| 137.960543                                             | 0.9211458                               | 0.034732236                                           | 4.221324453                          |
| 858.9362794                                            | 0.57339874                              | 0.053902385                                           | 4.798610312                          |
| 192.7808033                                            | 0.940298507                             | 0.025945841                                           | 4.514885205                          |
| 156.0996847                                            | 0.927840508                             | 0.023002912                                           | 4.348295695                          |
| 393.372034                                             | 0.953140746                             | 0.016667623                                           | 4.800801597                          |
| 133.0575135                                            | 0.907866145                             | 0.044123691                                           | 4.422025272                          |
| 117.9345423                                            | 0.878342687                             | 0.094605917                                           | 4.369422638                          |
| 102.136497                                             | 0.864763415                             | 0.054939964                                           | 4.274575976                          |
| 745.8727216                                            | 0.747491145                             | 0.013477256                                           | 4.960023975                          |
| 228.7991046                                            | 0.719969034                             | 0.069399709                                           | 4.515599742                          |
| 157.9875483                                            | 0.777173444                             | 0.057267644                                           | 4.180000738                          |
| 81.47995626                                            | 0.956458636                             | 0.053772055                                           | 3.727527973                          |
| 186.4901032                                            | 0.888688568                             | 0.030057435                                           | 4.438360673                          |
| 166.1516033                                            | 0.962637363                             | 0.04597882                                            | 4.341586192                          |
| 293.0220081                                            | 0.799449757                             | 0.03999759                                            | 4.779413309                          |
| 145.6013641                                            | 0.94943518                              | 0.038173722                                           | 4.268544194                          |
| 214.1343619                                            | 0.826536745                             | 0.026886535                                           | 4.449015129                          |
| 202.1274142                                            | 0.835735638                             | 0.029217427                                           | 4.486505265                          |
| 135.5696464                                            | 0.891602225                             | 0.036460285                                           | 4.472488557                          |
| 547.0884233                                            | 0.672774441                             | 0.035717022                                           | 4.632957496                          |
| 485.8843525                                            | 0.599437668                             | 0.101813418                                           | 4.729106438                          |
| 1137.131274                                            | 0.56875606                              | 0.042270586                                           | 4.957145109                          |
| 174.2467848                                            | 0.936357365                             | 0.041733805                                           | 4.546520806                          |
| 100.1035303                                            | 0.908569501                             | 0.04661681                                            | 4.181332248                          |
| 101.0127557                                            | 0.922733516                             | 0.070318651                                           | 4.31553914                           |
| 78.30371236                                            | 0.868817929                             | 0.097823282                                           | 4.205797378                          |
| 563.0028218                                            | 0.765219618                             | 0.013529729                                           | 4.48519954                           |
| 181.7154336                                            | 0.954568921                             | 0.022674208                                           | 4.312415579                          |
| 201.4054404                                            | 0.894708759                             | 0.020432297                                           | 4.559116486                          |
| 538.559609                                             | 0.748162367                             | 0.020002809                                           | 4.695577963                          |
| 46.13653845                                            | 0.94044665                              | 0.093637019                                           | 3.205752828                          |
| 343.7551585                                            | 0.714429665                             | 0.036725247                                           | 4.498025162                          |
| 147.6705513                                            | 0.819262574                             | 0.034824948                                           | 4.261949035                          |
| 102.243004                                             | 0.90748156                              | 0.068324215                                           | 4.368898822                          |
| 319.6223259                                            | 0.941491446                             | 0.012218713                                           | 4.706104678                          |
| 60.57615965                                            | 0.916923077                             | 0.066574505                                           | 3.475544549                          |
| 32.05128205                                            | 0.961538462                             | 0.152286188                                           | 3.081914511                          |
| 601.6208251                                            | 0.776745855                             | 0.013636974                                           | 4.774964816                          |
| 85.77602856                                            | 0.909665992                             | 0.128106685                                           | 4.328568279                          |
| 67.8323782                                             | 0.875739645                             | 0.126509045                                           | 4.080922718                          |
| 261.5982005                                            | 0.775739321                             | 0.038005446                                           | 4.612889289                          |
| 523.8420644                                            | 0.652110006                             | 0.046630175                                           | 4.802244843                          |
| 255.5066847                                            | 0.967032967                             | 0.025686527                                           | 4.294672932                          |
| 213.7917028                                            | 0.913348416                             | 0.024486469                                           | 4.65288938                           |
| 19.08722256                                            | 0.945512821                             | 0.327099222                                           | 2.952348296                          |
| 180.7942159                                            | 0.943841435                             | 0.028030285                                           | 4.421843486                          |
| 162.6767755                                            | 0.900824176                             | 0.055762508                                           | 4.433433785                          |

| log.sigma.5.0.mm.3D_glrIm_HighGrayLevelRunEmphasis | log.sigma.5.0.mm.3D_glrIm_RunLengthNonUniformityNormalized | log.sigma.5.0.mm.3D_glszm_GrayLevelVariance |
|----------------------------------------------------|------------------------------------------------------------|---------------------------------------------|
| 139.9170845                                        | 0.833660409                                                | 23.69120558                                 |
| 110.0348277                                        | 0.715582689                                                | 13.75530612                                 |
| 77.97317801                                        | 0.861897667                                                | 11.11680541                                 |
| 196.4470914                                        | 0.793656998                                                | 25.65282462                                 |
| 202.463759                                         | 0.912520617                                                | 39.28083333                                 |
| 78.90703553                                        | 0.848321821                                                | 11.2960027                                  |
| 32.17959513                                        | 0.84826656                                                 | 6.464285714                                 |
| 135.8739345                                        | 0.883360244                                                | 28.41634156                                 |
| 450.9975242                                        | 0.866574418                                                | 62.49494487                                 |
| 119.1295261                                        | 0.705870661                                                | 16.459271                                   |
| 78.69041369                                        | 0.827725284                                                | 13.52290303                                 |
| 105.6960925                                        | 0.800377084                                                | 20.025                                      |
| 60.88448333                                        | 0.756547852                                                | 18.4583416                                  |
| 134.1651181                                        | 0.849019503                                                | 17.0972265                                  |
| 136.996727                                         | 0.869671918                                                | 20.24843435                                 |
| 210.9238042                                        | 0.422175036                                                | 14.91447815                                 |
| 136.3321862                                        | 0.894078079                                                | 19.85121107                                 |
| 88.21785711                                        | 0.763799304                                                | 15.39611106                                 |
| 220.989684                                         | 0.906318621                                                | 36.84744228                                 |
| 80.99464802                                        | 0.66893433                                                 | 9.441189644                                 |
| 100.8747379                                        | 0.596510946                                                | 12.45868335                                 |
| 107.9235756                                        | 0.803524503                                                | 17.6524024                                  |
| 169.7093402                                        | 0.6298499                                                  | 16.24955865                                 |
| 161.3283754                                        | 0.90385546                                                 | 26.37597143                                 |
| 78.02516852                                        | 0.696433571                                                | 11.54361041                                 |
| 104.9372132                                        | 0.85530639                                                 | 12.64780521                                 |
| 105.9972065                                        | 0.637006773                                                | 12.85145399                                 |
| 124.7527046                                        | 0.578761305                                                | 14.2304051                                  |
| 184.4164103                                        | 0.663754086                                                | 20.33022833                                 |
| 130.0588615                                        | 0.712758849                                                | 17.64525714                                 |
| 106.5480549                                        | 0.607474726                                                | 14.10023669                                 |
| 152.3730897                                        | 0.564779818                                                | 15.61639005                                 |
| 122.1193118                                        | 0.802178231                                                | 22.64797912                                 |
| 57.51391941                                        | 0.939156364                                                | 13.85                                       |
| 132.3073364                                        | 0.903590288                                                | 20.67636364                                 |
| 115.8607154                                        | 0.801985421                                                | 17.79306667                                 |
| 120.650851                                         | 0.548367944                                                | 14.99770929                                 |
| 101.7731188                                        | 0.688933758                                                | 14.61722415                                 |
| 214.9583771                                        | 0.876155063                                                | 27.00382962                                 |
| 102.475732                                         | 0.81853222                                                 | 17.31130178                                 |
| 164.5363388                                        | 0.783015494                                                | 18.84809275                                 |
| 114.3658148                                        | 0.853877159                                                | 25.16141002                                 |
| 90.4802607                                         | 0.82585838                                                 | 13.69832367                                 |
| 116.6518881                                        | 0.866084891                                                | 25.22611054                                 |
| 125.4181907                                        | 0.796102853                                                | 19.95300076                                 |
| 74.00372651                                        | 0.448386103                                                | 6.427843524                                 |
| 165.8125972                                        | 0.803752046                                                | 26.91202716                                 |
| 95.88856313                                        | 0.856502741                                                | 16.91539116                                 |
| 43.51971068                                        | 0.947236318                                                | 9.392857143                                 |
| 306.5262003                                        | 0.925368411                                                | 48.77647059                                 |
| 131.0371533                                        | 0.629408338                                                | 15.35722655                                 |
| 73.49717761                                        | 0.797493472                                                | 10.943616                                   |
| 132.8081976                                        | 0.740765238                                                | 18.43358397                                 |
| 110.7489936                                        | 0.857338744                                                | 15.19539774                                 |
| 116.3757743                                        | 0.509286728                                                | 11.01010315                                 |
| 169.9861152                                        | 0.888523402                                                | 22.20555556                                 |
| 131.8839134                                        | 0.871909255                                                | 16.70324546                                 |
| 345.9070763                                        | 0.911377146                                                | 37.44449152                                 |
| 107.1682407                                        | 0.835540571                                                | 19.40628337                                 |
| 82.90365122                                        | 0.794944284                                                | 13.82237036                                 |
| 71.74572285                                        | 0.769851628                                                | 13.68730655                                 |
| 243.0268045                                        | 0.66550117                                                 | 29.6867214                                  |
| 72.68914115                                        | 0.608772208                                                | 11.2113673                                  |
| 63.12233006                                        | 0.677532597                                                | 8.307773438                                 |
| 73.445643                                          | 0.913331138                                                | 12.16646849                                 |
| 131.6972354                                        | 0.812689465                                                | 18.26913707                                 |
| 154.9534762                                        | 0.925483016                                                | 25.7651169                                  |
| 118.927868                                         | 0.714645776                                                | 19.9400502                                  |
| 132.6700738                                        | 0.900148049                                                | 17.63982222                                 |
| 114.077522                                         | 0.727462832                                                | 13.08049052                                 |
| 111.5237891                                        | 0.741955226                                                | 15.16566997                                 |
| 107.1567079                                        | 0.808932327                                                | 19.49668931                                 |
| 116.3933284                                        | 0.582823843                                                | 11.39672045                                 |
| 66.20985854                                        | 0.53857858                                                 | 8.707392833                                 |
| 151.2546226                                        | 0.523114782                                                | 17.7779641                                  |
| 150.8471314                                        | 0.882441284                                                | 22.45249968                                 |
| 84.36484615                                        | 0.843068914                                                | 11.09803922                                 |
| 90.17797368                                        | 0.858877339                                                | 17.47481492                                 |
| 55.69194393                                        | 0.777854794                                                | 13.58327035                                 |
| 205.1001803                                        | 0.682361338                                                | 17.03862418                                 |
| 164.3257418                                        | 0.911372749                                                | 22.45793943                                 |
| 152.9633666                                        | 0.817520369                                                | 20.92256335                                 |
| 180.9054218                                        | 0.657261456                                                | 19.16034218                                 |
| 39.35587562                                        | 0.882369202                                                | 7.408163265                                 |
| 100.3472302                                        | 0.620028224                                                | 12.06274757                                 |
| 86.27146037                                        | 0.716066226                                                | 10.15489789                                 |
| 86.89389257                                        | 0.835957126                                                | 17.46229532                                 |
| 279.7507427                                        | 0.891204434                                                | 29.18450651                                 |
| 49.45085865                                        | 0.845542369                                                | 8.736842105                                 |
| 30.48878205                                        | 0.923611111                                                | 6.991735537                                 |
| 225.815449                                         | 0.698282946                                                | 22.02509487                                 |
| 72.51875434                                        | 0.845508849                                                | 20.94569956                                 |
| 48.85238067                                        | 0.785930447                                                | 11.0656                                     |
| 101.4880789                                        | 0.674449863                                                | 14.27658613                                 |
| 102.3933967                                        | 0.581706923                                                | 15.36689186                                 |
| 231.4357897                                        | 0.936353037                                                | 34.66009204                                 |
| 173.0169271                                        | 0.847277002                                                | 25.55445159                                 |
| 17.30887048                                        | 0.90330492                                                 | 4.049586777                                 |
| 153.1325864                                        | 0.890934613                                                | 25.22382222                                 |
| 117.4347872                                        | 0.824573039                                                | 23.83211248                                 |

| log.sigma.5.0.mm.3D_glszm_SmallAreaHighGrayLevelEmphasis | log.sigma.5.0.mm.3D_glszm_GrayLevelNonUniformityNormalized | log.sigma.5.0.mm.3D_glszm_SizeZoneNonUniformityNormalized |
|----------------------------------------------------------|------------------------------------------------------------|-----------------------------------------------------------|
| 116.7450097                                              | 0.061740032                                                | 0.320765388                                               |
| 86.59357525                                              | 0.086020408                                                | 0.289795918                                               |
| 67.69990314                                              | 0.090010406                                                | 0.301768991                                               |
| 176.700201                                               | 0.056227821                                                | 0.344254888                                               |
| 174.589                                                  | 0.051111111                                                | 0.431111111                                               |
| 72.00955828                                              | 0.085511891                                                | 0.307471749                                               |
| 35.72582957                                              | 0.130102041                                                | 0.380102041                                               |
| 144.2415977                                              | 0.054399051                                                | 0.415249212                                               |
| 291.9044183                                              | 0.037236009                                                | 0.344545852                                               |
| 106.5094955                                              | 0.071974868                                                | 0.345077142                                               |
| 80.07653907                                              | 0.079648357                                                | 0.333597726                                               |
| 83.28121429                                              | 0.06484375                                                 | 0.32875                                                   |
| 83.73643034                                              | 0.070824245                                                | 0.310562496                                               |
| 124.5943296                                              | 0.071714374                                                | 0.327382784                                               |
| 120.7852269                                              | 0.063713058                                                | 0.339992754                                               |
| 149.116578                                               | 0.08425606                                                 | 0.343498331                                               |
| 121.0448397                                              | 0.065936178                                                | 0.356016917                                               |
| 106.018076                                               | 0.077345914                                                | 0.401553843                                               |
| 175.6699631                                              | 0.049796288                                                | 0.393390675                                               |
| 55.19682059                                              | 0.099166891                                                | 0.264295739                                               |
| 86.22837604                                              | 0.087462731                                                | 0.38026732                                                |
| 101.4778908                                              | 0.070286503                                                | 0.303709115                                               |
| 129.4389296                                              | 0.078525528                                                | 0.322258315                                               |
| 96.89212963                                              | 0.059021214                                                | 0.395505146                                               |
| 61.3815727                                               | 0.085991394                                                | 0.322040844                                               |
| 91.64037758                                              | 0.085733882                                                | 0.38494513                                                |
| 92.58928466                                              | 0.081705729                                                | 0.337727865                                               |
| 90.14671751                                              | 0.084597478                                                | 0.327407083                                               |
| 142.1185337                                              | 0.064934186                                                | 0.342127386                                               |
| 88.87889034                                              | 0.067755102                                                | 0.329763265                                               |
| 85.63643803                                              | 0.077011834                                                | 0.317840237                                               |
| 137.2099187                                              | 0.076618641                                                | 0.350070165                                               |
| 123.3099577                                              | 0.060470227                                                | 0.368777235                                               |
| 40.39444444                                              | 0.1                                                        | 0.46                                                      |
| 99.51573758                                              | 0.063801653                                                | 0.338842975                                               |
| 119.4207576                                              | 0.069888889                                                | 0.353977778                                               |
| 95.97333263                                              | 0.075372241                                                | 0.355997501                                               |
| 86.16192246                                              | 0.074333834                                                | 0.293676112                                               |
| 147.1495131                                              | 0.056839559                                                | 0.302338081                                               |
| 86.37100562                                              | 0.069112426                                                | 0.36852071                                                |
| 118.2332857                                              | 0.071787175                                                | 0.331608095                                               |
| 122.8575121                                              | 0.058610221                                                | 0.407066959                                               |
| 97.77499572                                              | 0.079566936                                                | 0.365682951                                               |
| 121.5440745                                              | 0.057592975                                                | 0.398824897                                               |
| 116.5388982                                              | 0.067498911                                                | 0.317107789                                               |
| 45.38997521                                              | 0.116206443                                                | 0.311143984                                               |
| 136.3872446                                              | 0.059828356                                                | 0.308756682                                               |
| 104.1167515                                              | 0.073979592                                                | 0.412698413                                               |
| 41.32142857                                              | 0.112244898                                                | 0.43877551                                                |
| 244.6236487                                              | 0.041107266                                                | 0.468788927                                               |
| 108.2266683                                              | 0.074076861                                                | 0.342219833                                               |
| 79.9932566                                               | 0.087872                                                   | 0.360256                                                  |
| 111.3280615                                              | 0.06783568                                                 | 0.321875454                                               |
| 82.95920731                                              | 0.078357469                                                | 0.297361635                                               |
| 87.67735409                                              | 0.088215497                                                | 0.381961931                                               |
| 149.7317745                                              | 0.060444444                                                | 0.399111111                                               |
| 127.8591857                                              | 0.070582343                                                | 0.402270917                                               |
| 252.38472                                                | 0.049236494                                                | 0.403967655                                               |
| 99.52050046                                              | 0.067817729                                                | 0.339266643                                               |
| 64.43455255                                              | 0.076365062                                                | 0.277717871                                               |
| 89.78215767                                              | 0.083982794                                                | 0.380930461                                               |
| 230.8936935                                              | 0.053485107                                                | 0.400948138                                               |
| 58.9091962                                               | 0.086141132                                                | 0.325101472                                               |
| 47.58191488                                              | 0.102890625                                                | 0.29625                                                   |
| 58.96222462                                              | 0.093935791                                                | 0.431629013                                               |
| 124.8469428                                              | 0.06825083                                                 | 0.371478003                                               |
| 155.2754777                                              | 0.064767536                                                | 0.425423273                                               |
| 99.27080206                                              | 0.064563351                                                | 0.329634034                                               |
| 119.7203761                                              | 0.073777778                                                | 0.441066667                                               |
| 99.30965644                                              | 0.081442114                                                | 0.385305947                                               |
| 95.25804535                                              | 0.074066597                                                | 0.313204447                                               |
| 114.5724716                                              | 0.068221624                                                | 0.367251912                                               |
| 90.75583644                                              | 0.08851287                                                 | 0.332524466                                               |
| 45.5352917                                               | 0.101027665                                                | 0.309532141                                               |
| 131.8396505                                              | 0.068714086                                                | 0.330266592                                               |
| 131.4035855                                              | 0.061923999                                                | 0.34648403                                                |
| 90.08304508                                              | 0.087957623                                                | 0.390747149                                               |
| 96.18360045                                              | 0.071273044                                                | 0.338655828                                               |
| 65.4054103                                               | 0.078861174                                                | 0.364071555                                               |
| 162.5031218                                              | 0.07560453                                                 | 0.342629437                                               |
| 139.6904228                                              | 0.06136837                                                 | 0.376061529                                               |
| 144.0419647                                              | 0.063656854                                                | 0.400109282                                               |
| 149.6333128                                              | 0.06651288                                                 | 0.347643214                                               |
| 24.67478175                                              | 0.12244898                                                 | 0.316326531                                               |
| 86.22249317                                              | 0.082885355                                                | 0.342222159                                               |
| 83.5548234                                               | 0.092275128                                                | 0.337827273                                               |
| 98.72349079                                              | 0.07426027                                                 | 0.374317725                                               |
| 235.3966298                                              | 0.056132623                                                | 0.407916173                                               |
| 41.30342591                                              | 0.113573407                                                | 0.429362881                                               |
| 31.20454545                                              | 0.123966942                                                | 0.702479339                                               |
| 169.1364258                                              | 0.063480864                                                | 0.352043249                                               |
| 88.83717491                                              | 0.067247985                                                | 0.38697318                                                |
| 44.61923861                                              | 0.086933333                                                | 0.271822222                                               |
| 70.95321892                                              | 0.077231262                                                | 0.307897765                                               |
| 85.27718162                                              | 0.074122804                                                | 0.350844303                                               |
| 167.6641738                                              | 0.053254438                                                | 0.439842209                                               |
| 162.4629371                                              | 0.058217532                                                | 0.347267691                                               |
| 14.15659091                                              | 0.140495868                                                | 0.289256198                                               |
| 115.8455434                                              | 0.060622222                                                | 0.3376                                                    |
| 74.50307999                                              | 0.058364839                                                | 0.340028355                                               |

| log.sigma.5.0.mm.3D_glszm_SizeZoneNonUniformity | log.sigma.5.0.mm.3D_glszm_GrayLevelNonUniformity | log.sigma.5.0.mm.3D_glszm_LargeAreaEmphasis | log.sigma.5.0.mm.3D_glszm_ZoneVariance |
|-------------------------------------------------|--------------------------------------------------|---------------------------------------------|----------------------------------------|
| 33.03883495                                     | 6.359223301                                      | 35.368923204                                | 23.08492789                            |
| 40.57142857                                     | 12.04285714                                      | 814.5928571                                 | 714.1638265                            |
| 18.70967742                                     | 5.580645161                                      | 18.17741935                                 | 10.0273153                             |
| 146.6525822                                     | 23.95305164                                      | 239.5093897                                 | 218.9199508                            |
| 25.86666667                                     | 3.066666667                                      | 4.05                                        | 1.216388889                            |
| 23.67532468                                     | 6.584415584                                      | 25.79220779                                 | 15.75071682                            |
| 10.64285714                                     | 3.642857143                                      | 16.57142857                                 | 10.32142857                            |
| 74.32960894                                     | 9.737430168                                      | 13.72625698                                 | 8.707655816                            |
| 187.0883978                                     | 20.21915285                                      | 23.18968692                                 | 15.80090148                            |
| 90.0651341                                      | 18.78544061                                      | 1209.383142                                 | 1130.438895                            |
| 41.03252033                                     | 9.796747967                                      | 38.74796748                                 | 29.40326525                            |
| 52.6                                            | 10.375                                           | 123.19375                                   | 100.8090234                            |
| 76.39837398                                     | 17.42276423                                      | 383.1788618                                 | 352.3447683                            |
| 55.98245614                                     | 12.26315789                                      | 40.37426901                                 | 30.84025854                            |
| 47.25899281                                     | 8.856115108                                      | 14.87769784                                 | 8.020081776                            |
| 142.5518072                                     | 34.96626506                                      | 53423.78313                                 | 52743.0133                             |
| 36.31372549                                     | 6.725490196                                      | 8.088235294                                 | 3.56218762                             |
| 122.0723684                                     | 23.51315789                                      | 375.5789474                                 | 349.5152355                            |
| 36.9787234                                      | 4.680851064                                      | 6.276595745                                 | 2.527840652                            |
| 48.36612022                                     | 18.14754098                                      | 2899.540984                                 | 2669.761773                            |
| 112.9393939                                     | 25.97643098                                      | 8724.393939                                 | 8432.409845                            |
| 67.42342342                                     | 15.6036036                                       | 133.6081081                                 | 116.8424032                            |
| 76.69747899                                     | 18.68907563                                      | 3035.008403                                 | 2884.482311                            |
| 27.28985507                                     | 4.072463768                                      | 5.550724638                                 | 1.835328712                            |
| 38.96694215                                     | 10.40495868                                      | 544.3140496                                 | 481.3675295                            |
| 41.57407407                                     | 9.259259259                                      | 25.35185185                                 | 17.53257888                            |
| 64.84375                                        | 15.6875                                          | 2647.255208                                 | 2505.124105                            |
| 82.83399209                                     | 21.40316206                                      | 6771.395257                                 | 6534.381321                            |
| 144.0356295                                     | 27.33729216                                      | 2443.809976                                 | 2365.90105                             |
| 57.70857143                                     | 11.85714286                                      | 834.6342857                                 | 741.0424816                            |
| 82.63846154                                     | 20.02307692                                      | 6376.296154                                 | 6115.225133                            |
| 223.6948357                                     | 48.95931142                                      | 14248.27074                                 | 14057.19095                            |
| 104.3639576                                     | 17.1130742                                       | 220.9151943                                 | 196.8254817                            |
| 4.6                                             | 1                                                | 2.7                                         | 0.45                                   |
| 18.63636364                                     | 3.509090909                                      | 6.381818182                                 | 2.160661157                            |
| 106.1933333                                     | 20.96666667                                      | 229.6866667                                 | 209.9138222                            |
| 139.5510204                                     | 29.54591837                                      | 14030.08418                                 | 13738.7376                             |
| 85.75342466                                     | 21.70547945                                      | 1768.123288                                 | 1660.304935                            |
| 36.8852459                                      | 6.93442623                                       | 14.18852459                                 | 7.265587208                            |
| 47.90769231                                     | 8.984615385                                      | 77.25384615                                 | 60.19059172                            |
| 46.09352518                                     | 9.978417266                                      | 158.6690647                                 | 132.209513                             |
| 62.68831169                                     | 9.025974026                                      | 27.81168831                                 | 21.69088379                            |
| 92.51778656                                     | 20.13043478                                      | 78.97233202                                 | 68.3648237                             |
| 70.19318182                                     | 10.13636364                                      | 21.52840909                                 | 15.3067859                             |
| 78.95983936                                     | 16.80722892                                      | 149.875502                                  | 129.8238093                            |
| 48.53846154                                     | 18.12820513                                      | 39856.85897                                 | 38316.79964                            |
| 180.0051458                                     | 34.87993139                                      | 204.8027444                                 | 182.6175134                            |
| 34.66666667                                     | 6.214285714                                      | 21.47619048                                 | 14.10884354                            |
| 6.142857143                                     | 1.571428571                                      | 2.857142857                                 | 0.387755102                            |
| 39.84705882                                     | 3.494117647                                      | 4.894117647                                 | 1.943806228                            |
| 104.3770492                                     | 22.59344262                                      | 4878.045902                                 | 4699.100457                            |
| 45.032                                          | 10.984                                           | 63.848                                      | 53.453824                              |
| 133.5783133                                     | 28.15180723                                      | 1145.20241                                  | 1085.930962                            |
| 21.11267606                                     | 5.563380282                                      | 30.23943662                                 | 18.90815314                            |
| 206.6414048                                     | 47.7245841                                       | 38226.51756                                 | 37789.7771                             |
| 59.86666667                                     | 9.066666667                                      | 12.58                                       | 7.592222222                            |
| 140.3925501                                     | 24.63323782                                      | 21.32378223                                 | 15.08094351                            |
| 94.12446352                                     | 11.472103                                        | 6.721030043                                 | 2.857190223                            |
| 35.96226415                                     | 7.188679245                                      | 40.35849057                                 | 29.20541118                            |
| 28.04950495                                     | 7.712871287                                      | 79.22772277                                 | 57.94000588                            |
| 95.61354582                                     | 21.07968127                                      | 506.4741036                                 | 472.8710655                            |
| 337.1973841                                     | 44.98097503                                      | 3156.444709                                 | 3091.528253                            |
| 92.97902098                                     | 24.63636364                                      | 5127.412587                                 | 4924.499535                            |
| 47.4                                            | 16.4625                                          | 1539.85                                     | 1415.806094                            |
| 12.51724138                                     | 2.724137931                                      | 5.551724138                                 | 2.211652794                            |
| 88.41176471                                     | 16.24369748                                      | 206.092437                                  | 182.6635831                            |
| 25.95081967                                     | 3.950819672                                      | 4.31147541                                  | 1.348562214                            |
| 143.3908046                                     | 28.08505747                                      | 1194.195402                                 | 1130.67267                             |
| 33.08                                           | 5.533333333                                      | 7.373333333                                 | 3.737955556                            |
| 90.93220339                                     | 19.22033898                                      | 678.720339                                  | 621.0633439                            |
| 118.7044855                                     | 28.07124011                                      | 801.3852243                                 | 754.3596466                            |
| 56.18954248                                     | 10.4379085                                       | 77.64052288                                 | 63.90695886                            |
| 123.3665768                                     | 32.83827493                                      | 13686.57412                                 | 13324.75425                            |
| 133.4083527                                     | 43.54292343                                      | 32032.83527                                 | 31400.97198                            |
| 276.1028708                                     | 57.44497608                                      | 38716.18541                                 | 38414.56491                            |
| 61.6741573                                      | 11.02247191                                      | 14.21348315                                 | 7.935361697                            |
| 59.78431373                                     | 13.45751634                                      | 46.06535948                                 | 37.18262207                            |
| 28.10843373                                     | 5.915662651                                      | 20.84337349                                 | 13.55987807                            |
| 68.80952381                                     | 14.9047619                                       | 200.5661376                                 | 177.2305926                            |
| 101.7609428                                     | 22.45454545                                      | 1539.93266                                  | 1457.042977                            |
| 29.70886076                                     | 4.848101266                                      | 5.405063291                                 | 1.847780804                            |
| 96.82644628                                     | 15.40495868                                      | 87.52479339                                 | 74.74859982                            |
| 177.2980392                                     | 33.92156863                                      | 3172.739216                                 | 3079.332676                            |
| 4.428571429                                     | 1.714285714                                      | 7.5                                         | 2.596938776                            |
| 128.6755319                                     | 31.16489362                                      | 6108.707447                                 | 5934.551692                            |
| 154.7248908                                     | 42.26200873                                      | 1568.386463                                 | 1509.753671                            |
| 44.16949153                                     | 8.762711864                                      | 42.41525424                                 | 32.84724217                            |
| 112.9927798                                     | 15.54873646                                      | 13.90252708                                 | 9.381146633                            |
| 8.157894737                                     | 2.157894737                                      | 14.63157895                                 | 7.706371191                            |
| 7.727272727                                     | 1.363636364                                      | 1.545454545                                 | 0.148760331                            |
| 161.2358079                                     | 29.07423581                                      | 1251.783843                                 | 1195.730178                            |
| 33.66666667                                     | 5.850574713                                      | 53.47126437                                 | 41.26146122                            |
| 20.38666667                                     | 6.52                                             | 128.6666667                                 | 97.90115556                            |
| 96.06410256                                     | 24.09615385                                      | 2519.801282                                 | 2382.791256                            |
| 134.3733681                                     | 28.38903394                                      | 14352.14099                                 | 13996.57729                            |
| 17.15384615                                     | 2.076923077                                      | 3.41025641                                  | 0.800788955                            |
| 72.57894737                                     | 12.16746411                                      | 57.28229665                                 | 46.69645841                            |
| 3.181818182                                     | 1.545454545                                      | 6.363636364                                 | 1.603305785                            |
| 25.32                                           | 4.546666667                                      | 8.44                                        | 3.716622222                            |
| 31.2826087                                      | 5.369565217                                      | 29.60869565                                 | 20.34593573                            |

| log.sigma.5.0.mm.3D_glszm_ZonePercentage | log.sigma.5.0.mm.3D_glszm_LargeAreaLowGrayLevelEmphasis | log.sigma.5.0.mm.3D_glszm_LargeAreaHighGrayLevelEmphasis | log.sigma.5.0.mm.3D_glszm_HighGrayLevelZoneEmphasis |
|------------------------------------------|---------------------------------------------------------|----------------------------------------------------------|-----------------------------------------------------|
| 0.28531856                               | 1.182871626                                             | 4494.194175                                              | 171.6796117                                         |
| 0.099786172                              | 9.488558005                                             | 99418.66429                                              | 140.1571429                                         |
| 0.350282486                              | 0.751878648                                             | 923.6129032                                              | 102.5967742                                         |
| 0.220382825                              | 1.929564569                                             | 39067.0939                                               | 266.8497653                                         |
| 0.594059406                              | 0.181285251                                             | 604.7833333                                              | 233.8833333                                         |
| 0.31557377                               | 1.718659392                                             | 1277                                                     | 110.2597403                                         |
| 0.4                                      | 2.827235493                                             | 239.5714286                                              | 48.71428571                                         |
| 0.44638404                               | 1.000825234                                             | 876.9329609                                              | 188.5307263                                         |
| 0.367886179                              | 0.147451664                                             | 11304.97053                                              | 464.412523                                          |
| 0.112548512                              | 13.13337007                                             | 131756.4483                                              | 167.532567                                          |
| 0.32712766                               | 3.696048255                                             | 1113.138211                                              | 117.4634146                                         |
| 0.211360634                              | 2.70501388                                              | 10225.4625                                               | 135.5875                                            |
| 0.180087848                              | 24.93507605                                             | 8554.357724                                              | 123.9796748                                         |
| 0.323863636                              | 1.061857857                                             | 2634.251462                                              | 187.3157895                                         |
| 0.381868132                              | 0.376990824                                             | 1410.661871                                              | 177.4892086                                         |
| 0.038326561                              | 230.9112052                                             | 12528599.47                                              | 234.739759                                          |
| 0.470046083                              | 0.348212844                                             | 823.5196078                                              | 168.1176471                                         |
| 0.195876289                              | 11.20149417                                             | 20723.36842                                              | 150.1546053                                         |
| 0.516483516                              | 0.190487072                                             | 1090                                                     | 253                                                 |
| 0.065969719                              | 50.76786488                                             | 266130.2678                                              | 99.53551913                                         |
| 0.058522167                              | 81.63093697                                             | 1053374.673                                              | 122.5319865                                         |
| 0.244224422                              | 4.215162228                                             | 6504.5                                                   | 165.6801802                                         |
| 0.081506849                              | 17.97489872                                             | 555513.7353                                              | 197.9327731                                         |
| 0.518796992                              | 0.327881708                                             | 949.6376812                                              | 155.4782609                                         |
| 0.126041667                              | 9.355225992                                             | 42645.30579                                              | 98.60330579                                         |
| 0.357615894                              | 0.684885226                                             | 1832.259259                                              | 133.2407407                                         |
| 0.083879423                              | 27.18631806                                             | 282791.0938                                              | 143.90625                                           |
| 0.064955071                              | 42.45497694                                             | 1191921.439                                              | 131.9486166                                         |
| 0.113293864                              | 11.22443337                                             | 605584.6318                                              | 211.6365796                                         |
| 0.103366804                              | 6.990314444                                             | 137584.6629                                              | 133.4228571                                         |
| 0.061890026                              | 56.70590771                                             | 823383.4769                                              | 137.8230769                                         |
| 0.072342353                              | 86.24454345                                             | 2490759.102                                              | 212.0109546                                         |
| 0.203743701                              | 3.841986773                                             | 20851.84452                                              | 174.3816254                                         |
| 0.666666667                              | 0.482419183                                             | 172.7                                                    | 56.1                                                |
| 0.486725664                              | 0.155600629                                             | 693.8363636                                              | 150.6363636                                         |
| 0.224887556                              | 3.722909486                                             | 16660.17333                                              | 172.5466667                                         |
| 0.058586161                              | 93.9511609                                              | 2290159.324                                              | 138.9336735                                         |
| 0.096306069                              | 28.76193355                                             | 174223.1473                                              | 145.6883562                                         |
| 0.380062305                              | 0.226782801                                             | 2808.565574                                              | 237.7295082                                         |
| 0.242085661                              | 2.912626241                                             | 5856.038462                                              | 127.8846154                                         |
| 0.194405594                              | 1.248928121                                             | 27132.77698                                              | 188.5971223                                         |
| 0.404199475                              | 1.759115135                                             | 997.5454545                                              | 165.7532468                                         |
| 0.307038835                              | 2.712040541                                             | 3225.770751                                              | 137.2332016                                         |
| 0.400911162                              | 2.168256156                                             | 995.2840909                                              | 164.0909091                                         |
| 0.223318386                              | 2.886366572                                             | 10401.31727                                              | 180.0923695                                         |
| 0.025481869                              | 433.0165662                                             | 3945209.853                                              | 71.87179487                                         |
| 0.212308813                              | 2.028486105                                             | 28872.43225                                              | 225.3207547                                         |
| 0.368421053                              | 1.345174819                                             | 1066.238095                                              | 138.702381                                          |
| 0.636363636                              | 0.43015849                                              | 104.3571429                                              | 51.64285714                                         |
| 0.582191781                              | 0.060175494                                             | 1172.741176                                              | 337.7764706                                         |
| 0.074754902                              | 36.19294032                                             | 771034.3443                                              | 165.8819672                                         |
| 0.310173697                              | 2.796198169                                             | 2006.888                                                 | 113.52                                              |
| 0.129890454                              | 10.21528475                                             | 168808.0337                                              | 168.5108434                                         |
| 0.29707113                               | 0.723463078                                             | 2828.774648                                              | 137.1267606                                         |
| 0.047850699                              | 280.3570115                                             | 5568546.272                                              | 131.3197782                                         |
| 0.447761194                              | 0.300420114                                             | 1325.293333                                              | 211.7266667                                         |
| 0.400229358                              | 0.434965048                                             | 1833.670487                                              | 170.3495702                                         |
| 0.508733624                              | 0.08867848                                              | 2071.214592                                              | 372.193133                                          |
| 0.299435028                              | 1.25425988                                              | 2786.330189                                              | 146.5                                               |
| 0.216738197                              | 4.379184148                                             | 4768.168317                                              | 111.0693069                                         |
| 0.172508591                              | 15.06205968                                             | 21324.08367                                              | 121.5657371                                         |
| 0.124114522                              | 12.24122748                                             | 895769.2663                                              | 320.8739596                                         |
| 0.070201276                              | 82.75748715                                             | 412456.2517                                              | 90.52097902                                         |
| 0.089786756                              | 32.62372057                                             | 102832.5813                                              | 78.34375                                            |
| 0.547169811                              | 0.1971143741                                            | 335.862069                                               | 82.37931034                                         |
| 0.206597222                              | 2.577260656                                             | 25118.09664                                              | 178.3235294                                         |
| 0.580952381                              | 0.179207201                                             | 490.0983607                                              | 190.9508197                                         |
| 0.125468705                              | 13.07148132                                             | 184662.4851                                              | 155.0873563                                         |
| 0.524475524                              | 0.268336162                                             | 591.3066667                                              | 161.32                                              |
| 0.131696429                              | 8.199678754                                             | 76381.72458                                              | 145.4279661                                         |
| 0.145825317                              | 9.587295401                                             | 85950.49077                                              | 149.4564644                                         |
| 0.26984127                               | 1.729256016                                             | 5084.352941                                              | 163.6535948                                         |
| 0.052571914                              | 102.7747851                                             | 2116873.313                                              | 142.7493261                                         |
| 0.039782167                              | 415.4384112                                             | 3019903.538                                              | 72.44779582                                         |
| 0.057579723                              | 223.7322629                                             | 7005420.117                                              | 207.7296651                                         |
| 0.399103139                              | 0.527238731                                             | 1327.398876                                              | 192.7696629                                         |
| 0.335526316                              | 2.207947819                                             | 1614.104575                                              | 124.875817                                          |
| 0.370535714                              | 1.667328344                                             | 773.1325301                                              | 136.626506                                          |
| 0.207009858                              | 8.238908307                                             | 7739.645503                                              | 91.47089947                                         |
| 0.109837278                              | 7.46139934                                              | 352384.1751                                              | 248.2424242                                         |
| 0.530201342                              | 0.094940862                                             | 688.0253165                                              | 195.4303797                                         |
| 0.279768786                              | 1.087586683                                             | 9798.272727                                              | 206.3099174                                         |
| 0.103469264                              | 15.66632561                                             | 695151.398                                               | 223.2019608                                         |
| 0.451612903                              | 0.431097025                                             | 262.3571429                                              | 41.71428571                                         |
| 0.075775897                              | 60.40036799                                             | 702399.6968                                              | 134.412234                                          |
| 0.130595951                              | 28.19197137                                             | 100600.6703                                              | 130.1004367                                         |
| 0.323287671                              | 2.310261219                                             | 1553.09322                                               | 135.3135593                                         |
| 0.470288625                              | 0.115493183                                             | 2563.801444                                              | 331.7184116                                         |
| 0.38                                     | 0.588720648                                             | 579.1578947                                              | 57.73684211                                         |
| 0.846153846                              | 0.196134188                                             | 39.72727273                                              | 32.90909091                                         |
| 0.133566638                              | 5.179821459                                             | 351137.0568                                              | 257.4934498                                         |
| 0.286184211                              | 6.453078157                                             | 1420.517241                                              | 125.1264368                                         |
| 0.180288462                              | 8.269644784                                             | 4443.546667                                              | 73.16                                               |
| 0.08543264                               | 30.07947622                                             | 277699.6218                                              | 116.4679487                                         |
| 0.053032401                              | 134.669105                                              | 1844255.621                                              | 131.9843342                                         |
| 0.619047619                              | 0.050566021                                             | 783.1538462                                              | 235.7179487                                         |
| 0.307352941                              | 0.842194074                                             | 7198.023923                                              | 240.4784689                                         |
| 0.458333333                              | 2.210693671                                             | 70.81818182                                              | 23.09090909                                         |
| 0.460122699                              | 0.15602846                                              | 1285.28                                                  | 170.5066667                                         |
| 0.328571429                              | 0.595808305                                             | 3748.119565                                              | 120.5978261                                         |

| log.sigma.5.0.mm.3D_glszm_SmallAreaEmphasis | log.sigma.5.0.mm.3D_glszm_LowGrayLevelZoneEmphasis | log.sigma.5.0.mm.3D_glszm_ZoneEntropy | log.sigma.5.0.mm.3D_glszm_SmallAreaLowGrayLevelEmphasis |
|---------------------------------------------|----------------------------------------------------|---------------------------------------|---------------------------------------------------------|
| 0.585799739                                 | 0.023270984                                        | 5.547663392                           | 0.005571303                                             |
| 0.54658251                                  | 0.029763868                                        | 5.429991303                           | 0.012657105                                             |
| 0.559921352                                 | 0.035166113                                        | 4.96574127                            | 0.01084807                                              |
| 0.600546707                                 | 0.009935387                                        | 6.125607014                           | 0.004225954                                             |
| 0.674597222                                 | 0.027337731                                        | 4.950489296                           | 0.009172088                                             |
| 0.561876014                                 | 0.030314944                                        | 4.935236865                           | 0.007942975                                             |
| 0.634473474                                 | 0.072148772                                        | 4.00862178                            | 0.016891237                                             |
| 0.667112047                                 | 0.020863464                                        | 5.683279307                           | 0.007484208                                             |
| 0.607747452                                 | 0.007171058                                        | 6.68482867                            | 0.004593485                                             |
| 0.608823115                                 | 0.016950285                                        | 5.773963729                           | 0.008084975                                             |
| 0.592738503                                 | 0.033518086                                        | 5.292448914                           | 0.008339685                                             |
| 0.589584488                                 | 0.026132235                                        | 5.749101908                           | 0.011753906                                             |
| 0.576726376                                 | 0.038089736                                        | 5.905404279                           | 0.007599552                                             |
| 0.589997879                                 | 0.016832831                                        | 5.577936932                           | 0.005530095                                             |
| 0.60262682                                  | 0.01910583                                         | 5.656740944                           | 0.012172234                                             |
| 0.605352187                                 | 0.009538789                                        | 5.742536682                           | 0.005959547                                             |
| 0.611214352                                 | 0.023661543                                        | 5.28137072                            | 0.00716414                                              |
| 0.658204113                                 | 0.021351651                                        | 5.575852915                           | 0.007228751                                             |
| 0.645550778                                 | 0.022757848                                        | 5.428541283                           | 0.007842948                                             |
| 0.516657894                                 | 0.024630303                                        | 5.52992769                            | 0.006614407                                             |
| 0.640855936                                 | 0.026922457                                        | 5.492640557                           | 0.015927808                                             |
| 0.565539695                                 | 0.01652614                                         | 5.831609772                           | 0.00499033                                              |
| 0.588104569                                 | 0.013563123                                        | 5.779770204                           | 0.00817448                                              |
| 0.647999195                                 | 0.036069043                                        | 5.083465675                           | 0.016314833                                             |
| 0.586497218                                 | 0.029970714                                        | 5.445146089                           | 0.019047377                                             |
| 0.6383053                                   | 0.023572601                                        | 5.079821563                           | 0.008688406                                             |
| 0.603505573                                 | 0.018034003                                        | 5.530607444                           | 0.006085109                                             |
| 0.594027402                                 | 0.020098881                                        | 5.695112783                           | 0.006682711                                             |
| 0.604611827                                 | 0.011749021                                        | 6.01833656                            | 0.00430071                                              |
| 0.590341119                                 | 0.03122071                                         | 5.672000207                           | 0.014929133                                             |
| 0.583631007                                 | 0.018846529                                        | 5.791864518                           | 0.009727566                                             |
| 0.613335173                                 | 0.009493735                                        | 5.945544459                           | 0.004406012                                             |
| 0.627998784                                 | 0.021408135                                        | 5.843978947                           | 0.007661249                                             |
| 0.686111111                                 | 0.150935164                                        | 3.321928095                           | 0.068982433                                             |
| 0.59699732                                  | 0.035372328                                        | 4.962822441                           | 0.025618855                                             |
| 0.617506029                                 | 0.016447448                                        | 5.763571851                           | 0.009312997                                             |
| 0.619759167                                 | 0.018285837                                        | 5.828589295                           | 0.008210705                                             |
| 0.553054082                                 | 0.017844853                                        | 5.896363602                           | 0.006196104                                             |
| 0.562696013                                 | 0.018681618                                        | 5.75268181                            | 0.011951278                                             |
| 0.629266931                                 | 0.028832483                                        | 5.442565822                           | 0.013350689                                             |
| 0.591553595                                 | 0.018261041                                        | 5.588265661                           | 0.012086116                                             |
| 0.66252491                                  | 0.029550135                                        | 5.545341224                           | 0.015149145                                             |
| 0.622209505                                 | 0.023569284                                        | 5.478084401                           | 0.01299377                                              |
| 0.655536529                                 | 0.02675681                                         | 5.644516291                           | 0.007602437                                             |
| 0.582611812                                 | 0.017137131                                        | 5.943828457                           | 0.006946077                                             |
| 0.57873613                                  | 0.03139183                                         | 5.298015118                           | 0.017320044                                             |
| 0.57327094                                  | 0.011819072                                        | 6.356940345                           | 0.005172578                                             |
| 0.665914396                                 | 0.030114059                                        | 5.029871328                           | 0.010179477                                             |
| 0.615079365                                 | 0.111921225                                        | 3.521640636                           | 0.034566494                                             |
| 0.709334967                                 | 0.022091926                                        | 5.542935166                           | 0.019707343                                             |
| 0.606280056                                 | 0.015321356                                        | 5.776068478                           | 0.006515756                                             |
| 0.618746017                                 | 0.024104132                                        | 5.090449113                           | 0.014514457                                             |
| 0.585561088                                 | 0.017105463                                        | 5.969378173                           | 0.005592248                                             |
| 0.562840088                                 | 0.029673565                                        | 5.234342634                           | 0.019591712                                             |
| 0.641592065                                 | 0.015626853                                        | 5.562892424                           | 0.007641773                                             |
| 0.652570368                                 | 0.016888768                                        | 5.498838378                           | 0.011085405                                             |
| 0.659369822                                 | 0.014109116                                        | 5.623902071                           | 0.008169817                                             |
| 0.658905548                                 | 0.011355785                                        | 5.921529962                           | 0.004662033                                             |
| 0.600670618                                 | 0.026137686                                        | 5.416264205                           | 0.008835516                                             |
| 0.533309715                                 | 0.028396449                                        | 5.54677739                            | 0.008092764                                             |
| 0.641185837                                 | 0.025911473                                        | 5.427957388                           | 0.008111396                                             |
| 0.657807274                                 | 0.007105012                                        | 6.218271813                           | 0.004221139                                             |
| 0.586870707                                 | 0.033012391                                        | 5.623808839                           | 0.014639345                                             |
| 0.56107649                                  | 0.043094812                                        | 5.352349852                           | 0.024125601                                             |
| 0.680136494                                 | 0.062134267                                        | 4.064203409                           | 0.052192515                                             |
| 0.631588985                                 | 0.015908678                                        | 5.687547472                           | 0.006070839                                             |
| 0.673349132                                 | 0.030862061                                        | 4.871242412                           | 0.009271425                                             |
| 0.594469651                                 | 0.020406644                                        | 6.05680209                            | 0.006911561                                             |
| 0.688086303                                 | 0.028322635                                        | 4.975616279                           | 0.020313119                                             |
| 0.644802702                                 | 0.017833703                                        | 5.475006619                           | 0.011559173                                             |
| 0.575164024                                 | 0.019776237                                        | 5.918975712                           | 0.009363329                                             |
| 0.627837513                                 | 0.020062394                                        | 5.520021915                           | 0.012411561                                             |
| 0.593121424                                 | 0.014957496                                        | 5.609583575                           | 0.005763657                                             |
| 0.571941325                                 | 0.04734807                                         | 5.61516174                            | 0.01866693                                              |
| 0.593065673                                 | 0.00990373                                         | 6.145084473                           | 0.005274635                                             |
| 0.608915915                                 | 0.01999156                                         | 5.770454926                           | 0.008264726                                             |
| 0.648261991                                 | 0.022636805                                        | 5.173196405                           | 0.015861686                                             |
| 0.592261255                                 | 0.028090116                                        | 5.228551293                           | 0.018178357                                             |
| 0.625871336                                 | 0.060085643                                        | 5.434823353                           | 0.020292104                                             |
| 0.605474215                                 | 0.010486557                                        | 5.727177039                           | 0.006948129                                             |
| 0.629396097                                 | 0.022728728                                        | 5.152695976                           | 0.016984166                                             |
| 0.657270555                                 | 0.015689095                                        | 5.714985818                           | 0.011938461                                             |
| 0.611655395                                 | 0.009906725                                        | 6.089580976                           | 0.003816889                                             |
| 0.570813492                                 | 0.118280959                                        | 3.521640636                           | 0.089878835                                             |
| 0.606085832                                 | 0.017498384                                        | 5.765744727                           | 0.00965299                                              |
| 0.600263446                                 | 0.015070144                                        | 5.659793661                           | 0.008694002                                             |
| 0.630684119                                 | 0.025410488                                        | 5.278841678                           | 0.007928345                                             |
| 0.662325259                                 | 0.009893086                                        | 5.827184255                           | 0.004808574                                             |
| 0.661121211                                 | 0.082300985                                        | 3.787143961                           | 0.069223384                                             |
| 0.863636364                                 | 0.148785703                                        | 3.277613437                           | 0.136948582                                             |
| 0.615764242                                 | 0.00939929                                         | 6.097030687                           | 0.004325438                                             |
| 0.638929213                                 | 0.031256627                                        | 5.071411168                           | 0.009914373                                             |
| 0.529578331                                 | 0.070514079                                        | 5.275141525                           | 0.027400162                                             |
| 0.573867889                                 | 0.029145383                                        | 5.911864045                           | 0.011941615                                             |
| 0.614343319                                 | 0.021145176                                        | 5.75592719                            | 0.01168179                                              |
| 0.684116809                                 | 0.035058462                                        | 4.958353821                           | 0.032501107                                             |
| 0.605535021                                 | 0.014292806                                        | 5.808113901                           | 0.005230521                                             |
| 0.473964646                                 | 0.158275742                                        | 3.459431619                           | 0.026621877                                             |
| 0.591621077                                 | 0.028771119                                        | 5.245503944                           | 0.018892276                                             |
| 0.599540915                                 | 0.058480808                                        | 5.455748576                           | 0.038430724                                             |

| log.sigma.5.0.mm.3D_ngtdm_Coarseness | log.sigma.5.0.mm.3D_ngtdm_Complexity | log.sigma.5.0.mm.3D_ngtdm_Strength | log.sigma.5.0.mm.3D_ngtdm_Busyness | log.sigma.5.0.mm.3D_ngtdm_Contrast |
|--------------------------------------|--------------------------------------|------------------------------------|------------------------------------|------------------------------------|
| 0.033203215                          | 0.838481127                          | 5.566740487                        | 0.148182429                        | 0.000404195                        |
| 0.00942528                           | 0.098551038                          | 1.117862861                        | 0.515961873                        | 4.41E-05                           |
| 0.051766778                          | 0.772970801                          | 3.83531157                         | 0.199532058                        | 0.000773813                        |
| 0.006567297                          | 0.235628367                          | 1.695643092                        | 0.389460649                        | 3.80E-05                           |
| 0.085165159                          | 5.848449386                          | 18.7568686                         | 0.061870355                        | 0.003569003                        |
| 0.032732694                          | 0.655927586                          | 2.530887334                        | 0.326000208                        | 0.000779935                        |
| 0.099476316                          | 1.067614426                          | 5.513064375                        | 0.233008306                        | 0.002106394                        |
| 0.023656747                          | 1.459864273                          | 5.70202394                         | 0.219234422                        | 0.000507813                        |
| 0.010204196                          | 0.862853407                          | 6.185032092                        | 0.174428257                        | 0.000129526                        |
| 0.00607104                           | 0.071483015                          | 0.909975149                        | 0.687558778                        | 1.88E-05                           |
| 0.020848509                          | 0.696983174                          | 2.654866011                        | 0.433280379                        | 0.000481806                        |
| 0.016112634                          | 0.381785265                          | 2.978541073                        | 0.292925699                        | 0.000104198                        |
| 0.008551231                          | 0.201005004                          | 1.9930681                          | 0.949879134                        | 5.70E-05                           |
| 0.020666425                          | 0.567910495                          | 3.119361649                        | 0.296093065                        | 0.000289455                        |
| 0.028732594                          | 1.040696794                          | 5.257849685                        | 0.147810468                        | 0.000325356                        |
| 0.001413029                          | 0.011980811                          | 0.610108809                        | 1.193119873                        | 7.16E-07                           |
| 0.038221176                          | 1.713980578                          | 5.989246139                        | 0.13423845                         | 0.000936624                        |
| 0.007080268                          | 0.197786508                          | 1.54937363                         | 0.69681333                         | 4.52E-05                           |
| 0.045034677                          | 3.88993828                           | 10.56385527                        | 0.077717889                        | 0.001657404                        |
| 0.005725504                          | 0.031300777                          | 0.54092357                         | 1.147938311                        | 1.85E-05                           |
| 0.002990153                          | 0.021720874                          | 0.499829041                        | 1.213498142                        | 3.85E-06                           |
| 0.013573942                          | 0.272367479                          | 2.166626248                        | 0.484948549                        | 0.000123012                        |
| 0.005040603                          | 0.057393474                          | 1.132760608                        | 0.495102568                        | 7.40E-06                           |
| 0.072664393                          | 2.635863979                          | 11.5464752                         | 0.071794638                        | 0.002038539                        |
| 0.013000724                          | 0.101287539                          | 1.315454137                        | 0.46880264                         | 4.64E-05                           |
| 0.028131746                          | 0.65578263                           | 2.798647633                        | 0.235980019                        | 0.00047564                         |
| 0.006265816                          | 0.061670943                          | 1.068646338                        | 0.57109823                         | 9.51E-06                           |
| 0.004217891                          | 0.039634063                          | 1.101003408                        | 0.626628485                        | 5.70E-06                           |
| 0.003886965                          | 0.087024821                          | 1.271179625                        | 0.476888188                        | 8.63E-06                           |
| 0.009760422                          | 0.080830779                          | 1.308787361                        | 0.443679496                        | 3.65E-05                           |
| 0.003808689                          | 0.030436867                          | 0.663873532                        | 0.909166325                        | 5.77E-06                           |
| 0.001704332                          | 0.022065378                          | 0.513055353                        | 1.288575306                        | 1.90E-06                           |
| 0.00894456                           | 0.232201637                          | 1.734625643                        | 0.503788944                        | 6.57E-05                           |
| 0.222783185                          | 0.8079406503                         | 15.80191484                        | 0.079964414                        | 0.050727668                        |
| 0.074131281                          | 2.59180272                           | 9.224514535                        | 0.077337533                        | 0.001699809                        |
| 0.007693695                          | 0.246322802                          | 1.343028295                        | 0.57749275                         | 6.22E-05                           |
| 0.002280829                          | 0.020209082                          | 0.499160308                        | 1.202917722                        | 3.37E-06                           |
| 0.005381928                          | 0.05158175                           | 0.816796709                        | 0.872879394                        | 1.66E-05                           |
| 0.032944544                          | 1.433465438                          | 7.575933742                        | 0.094548943                        | 0.000520943                        |
| 0.019632132                          | 0.377723565                          | 2.220230042                        | 0.430432368                        | 0.000300145                        |
| 0.01735344                           | 0.372637663                          | 3.614048398                        | 0.165763618                        | 7.38E-05                           |
| 0.024177538                          | 1.339098607                          | 5.779341435                        | 0.266369648                        | 0.000481411                        |
| 0.011013939                          | 0.379028651                          | 1.696095512                        | 0.582883712                        | 0.000135021                        |
| 0.023098636                          | 1.145839335                          | 5.589585978                        | 0.256858188                        | 0.000432902                        |
| 0.011075047                          | 0.316908099                          | 2.527132978                        | 0.395810487                        | 7.50E-05                           |
| 0.00258832                           | 0.005884688                          | 0.250445492                        | 2.214499646                        | 3.34E-06                           |
| 0.004777015                          | 0.270430678                          | 2.817057185                        | 0.427887393                        | 1.72E-05                           |
| 0.035487859                          | 1.178009062                          | 4.070924302                        | 0.242223361                        | 0.000983129                        |
| 0.208680172                          | 4.223300909                          | 8.524388777                        | 0.131451978                        | 0.01923266                         |
| 0.051711296                          | 7.282481476                          | 15.99006985                        | 0.047167758                        | 0.002160923                        |
| 0.003877565                          | 0.036573963                          | 0.726649596                        | 0.773416389                        | 6.74E-06                           |
| 0.018645603                          | 0.663039183                          | 2.410918517                        | 0.458383003                        | 0.000318895                        |
| 0.003847064                          | 0.087450347                          | 0.826065937                        | 0.826911436                        | 1.55E-05                           |
| 0.038266564                          | 0.870535262                          | 4.545008846                        | 0.152199566                        | 0.000553953                        |
| 0.001321801                          | 0.009711721                          | 0.285226905                        | 2.170604258                        | 1.48E-06                           |
| 0.026730485                          | 1.412233696                          | 4.566092635                        | 0.159984007                        | 0.000578084                        |
| 0.010077709                          | 0.55903107                           | 2.277613386                        | 0.361501698                        | 0.000114181                        |
| 0.021050088                          | 1.876253905                          | 7.090631147                        | 0.090885515                        | 0.000412118                        |
| 0.03227073                           | 0.753427049                          | 5.289861174                        | 0.174216133                        | 0.000299662                        |
| 0.025328541                          | 0.312791792                          | 2.685604143                        | 0.3737322007                       | 0.000237569                        |
| 0.007048024                          | 0.14946934                           | 1.070591418                        | 0.963659084                        | 4.88E-05                           |
| 0.002255408                          | 0.074421099                          | 1.174045475                        | 0.606023309                        | 4.02E-06                           |
| 0.003593049                          | 0.028400549                          | 0.558561213                        | 1.367633908                        | 6.68E-06                           |
| 0.006691485                          | 0.036018056                          | 0.417478517                        | 1.392958508                        | 3.14E-05                           |
| 0.107072004                          | 3.084484199                          | 7.378913038                        | 0.107048877                        | 0.004733575                        |
| 0.010324515                          | 0.235542569                          | 1.809465093                        | 0.362948536                        | 6.27E-05                           |
| 0.062480593                          | 4.64651201                           | 10.01373039                        | 0.076722143                        | 0.002948119                        |
| 0.004239493                          | 0.076612789                          | 0.862538448                        | 0.831474123                        | 1.91E-05                           |
| 0.045774543                          | 2.805786914                          | 6.688469693                        | 0.114735094                        | 0.001690283                        |
| 0.006985948                          | 0.094627918                          | 0.923268266                        | 0.667399373                        | 3.16E-05                           |
| 0.004859852                          | 0.077614272                          | 0.700386422                        | 0.911198971                        | 2.27E-05                           |
| 0.017664654                          | 0.639227655                          | 3.164855734                        | 0.302457476                        | 0.00020023                         |
| 0.002172097                          | 0.016497148                          | 0.34921654                         | 1.552651909                        | 4.20E-06                           |
| 0.001615438                          | 0.005379579                          | 0.1637645                          | 3.573966585                        | 2.80E-06                           |
| 0.001090317                          | 0.01353141                           | 0.434147325                        | 1.746405287                        | 8.44E-07                           |
| 0.01998111                           | 1.044840407                          | 3.498247943                        | 0.231868801                        | 0.000426153                        |
| 0.019873197                          | 0.455136476                          | 2.055488814                        | 0.470927622                        | 0.000304219                        |
| 0.03616876                           | 1.572158378                          | 5.680495358                        | 0.217091624                        | 0.000818629                        |
| 0.01067366                           | 0.173655057                          | 1.005387206                        | 0.94902664                         | 0.000107803                        |
| 0.005065365                          | 0.092249022                          | 1.279288629                        | 0.419888711                        | 1.05E-05                           |
| 0.045566023                          | 2.848545266                          | 6.184033135                        | 0.117287673                        | 0.0018421                          |
| 0.012940345                          | 0.480449804                          | 2.991047722                        | 0.24776202                         | 9.20E-05                           |
| 0.002902446                          | 0.062762411                          | 0.970276838                        | 0.654751558                        | 5.19E-06                           |
| 0.168971057                          | 1.988328333                          | 6.274616913                        | 0.111731652                        | 0.006324855                        |
| 0.002772614                          | 0.026537534                          | 0.418255813                        | 1.378848901                        | 5.46E-06                           |
| 0.003384432                          | 0.043296128                          | 0.414914599                        | 1.637849985                        | 1.22E-05                           |
| 0.025216793                          | 0.868974535                          | 4.362274268                        | 0.316506638                        | 0.000412028                        |
| 0.013804615                          | 1.670109287                          | 4.391499352                        | 0.15520425                         | 0.00027075                         |
| 0.11040439                           | 1.509516162                          | 4.713183022                        | 0.170002023                        | 0.003859036                        |
| 0.341880342                          | 4.719003945                          | 10.3432335                         | 0.120332278                        | 0.026639619                        |
| 0.004055807                          | 0.10933607                           | 1.416181995                        | 0.424023027                        | 1.10E-05                           |
| 0.029261106                          | 1.090686537                          | 5.683057491                        | 0.368778135                        | 0.000560292                        |
| 0.026811125                          | 0.233217548                          | 1.918708955                        | 0.506262959                        | 0.000223951                        |
| 0.004184656                          | 0.033411868                          | 0.489854389                        | 1.285048153                        | 1.44E-05                           |
| 0.002376329                          | 0.017346929                          | 0.405786093                        | 1.504411959                        | 3.78E-06                           |
| 0.102665234                          | 8.163583217                          | 18.03096229                        | 0.035639733                        | 0.005224878                        |
| 0.016994492                          | 0.640398246                          | 3.588843078                        | 0.201781987                        | 0.000180399                        |
| 0.186550478                          | 1.671604712                          | 4.132388366                        | 0.41500486                         | 0.01091882                         |
| 0.055890389                          | 2.009941957                          | 9.567587528                        | 0.094836846                        | 0.001249187                        |
| 0.036149745                          | 0.825525878                          | 4.897383321                        | 0.151369151                        | 0.000510102                        |

| log.sigma.4.5.mm.3D_gldm_GrayLevelVariance | log.sigma.4.5.mm.3D_gldm_HighGrayLevelEmphasis | log.sigma.4.5.mm.3D_gldm_GrayLevelNonUniformityNormalized | log.sigma.4.5.mm.3D_gldm_DependenceEntropy |
|--------------------------------------------|------------------------------------------------|-----------------------------------------------------------|--------------------------------------------|
| 19.61191212                                | 140.2465374                                    | 0.063328243                                               | 6.352886589                                |
| 10.06574243                                | 118.3414113                                    | 0.091221387                                               | 6.899201827                                |
| 11.24932171                                | 69.50847458                                    | 0.09176801                                                | 5.57059499                                 |
| 17.96213129                                | 227.7697879                                    | 0.068506826                                               | 7.028454928                                |
| 40.55582786                                | 213.960396                                     | 0.050877365                                               | 5.543070983                                |
| 9.867844665                                | 56.04098361                                    | 0.091306101                                               | 5.551648931                                |
| 6.368163265                                | 31.94285714                                    | 0.118367347                                               | 4.875731503                                |
| 23.44349849                                | 111.1296758                                    | 0.061697378                                               | 6.234956849                                |
| 76.26381453                                | 399.5325203                                    | 0.036798349                                               | 7.17355864                                 |
| 9.299543063                                | 147.0961621                                    | 0.093919942                                               | 7.019165247                                |
| 12.18568923                                | 65.36702128                                    | 0.083875622                                               | 5.9363304                                  |
| 13.96395771                                | 109.5746367                                    | 0.074686458                                               | 6.703444629                                |
| 11.6729462                                 | 59.32942899                                    | 0.097343131                                               | 6.523307733                                |
| 17.57162176                                | 111.9337121                                    | 0.068669651                                               | 6.312172288                                |
| 16.79376736                                | 109.5137363                                    | 0.069556817                                               | 6.067392091                                |
| 4.68127151                                 | 194.0003694                                    | 0.227138107                                               | 6.889232522                                |
| 20.31349147                                | 115.1290323                                    | 0.065599185                                               | 5.743205301                                |
| 11.17370171                                | 90.12242268                                    | 0.088168575                                               | 6.805053557                                |
| 35.49088274                                | 182.4065934                                    | 0.051141167                                               | 5.907044195                                |
| 8.6355728                                  | 89.16258111                                    | 0.098984597                                               | 7.100300546                                |
| 5.715130345                                | 116.1659113                                    | 0.132516567                                               | 6.888233526                                |
| 15.80992665                                | 103.1265127                                    | 0.078894468                                               | 6.683344956                                |
| 7.341840753                                | 158.0174658                                    | 0.116299259                                               | 6.982584207                                |
| 33.44632257                                | 210.556391                                     | 0.053083837                                               | 5.502015988                                |
| 6.586649306                                | 66.19791667                                    | 0.114144965                                               | 6.712636403                                |
| 11.19846717                                | 87.09602649                                    | 0.083548967                                               | 5.994384607                                |
| 5.890869413                                | 109.6120577                                    | 0.133156256                                               | 6.943588134                                |
| 8.145167251                                | 122.8302953                                    | 0.152419563                                               | 6.927446839                                |
| 12.03771055                                | 206.4585576                                    | 0.120144785                                               | 7.001638534                                |
| 12.59211743                                | 149.1630242                                    | 0.083909318                                               | 6.976730215                                |
| 7.146591807                                | 118.6724589                                    | 0.12512754                                                | 6.984462023                                |
| 6.573444921                                | 138.5774935                                    | 0.15767233                                                | 7.079047102                                |
| 16.22672847                                | 127.6515479                                    | 0.069559705                                               | 6.855896887                                |
| 18.35555556                                | 72.13333333                                    | 0.093333333                                               | 3.506890596                                |
| 21.24019109                                | 154.2035398                                    | 0.065862636                                               | 5.234933972                                |
| 12.10751895                                | 104.3193403                                    | 0.08273412                                                | 6.497489336                                |
| 7.528402887                                | 139.3610821                                    | 0.158384659                                               | 6.945791223                                |
| 10.85761889                                | 108.0478232                                    | 0.088605882                                               | 7.170961469                                |
| 27.23797323                                | 186.5794393                                    | 0.056492076                                               | 6.282920728                                |
| 16.08045941                                | 90.29050279                                    | 0.070954229                                               | 6.504091242                                |
| 12.86613526                                | 171.3090909                                    | 0.08195413                                                | 6.685974187                                |
| 20.38824478                                | 129.4015748                                    | 0.072533256                                               | 6.149896848                                |
| 11.24050187                                | 95.12742718                                    | 0.085617165                                               | 6.304936752                                |
| 22.79055215                                | 112.284738                                     | 0.063578956                                               | 6.254750084                                |
| 16.90518289                                | 107.8466368                                    | 0.07486899                                                | 6.661518048                                |
| 4.156843971                                | 87.07628226                                    | 0.212095109                                               | 6.706062483                                |
| 20.69325282                                | 164.4311726                                    | 0.067706242                                               | 6.907141304                                |
| 14.72245306                                | 70.44736842                                    | 0.076523546                                               | 5.702594829                                |
| 11.77066116                                | 60.13636364                                    | 0.103305785                                               | 3.823067982                                |
| 43.71945956                                | 291.0273973                                    | 0.047100769                                               | 5.675901145                                |
| 8.025878508                                | 123.1882353                                    | 0.126232819                                               | 7.060492314                                |
| 9.142485946                                | 53.03722084                                    | 0.103534903                                               | 5.869661953                                |
| 11.78958672                                | 141.856651                                     | 0.084327086                                               | 6.962607933                                |
| 13.93252919                                | 92.31799163                                    | 0.07858756                                                | 5.954769687                                |
| 5.879999478                                | 130.2243941                                    | 0.195492992                                               | 6.973567053                                |
| 21.52420584                                | 150.9402985                                    | 0.060957897                                               | 6.00955236                                 |
| 15.89397278                                | 152.1834862                                    | 0.071313968                                               | 6.161528152                                |
| 34.34065426                                | 280.8580786                                    | 0.049789287                                               | 6.267598258                                |
| 15.32299148                                | 94.50282486                                    | 0.074164512                                               | 6.14388269                                 |
| 12.51408204                                | 86.12017167                                    | 0.080089889                                               | 6.411223569                                |
| 9.697257236                                | 77.34364261                                    | 0.095389048                                               | 6.450208784                                |
| 14.19958121                                | 228.9803719                                    | 0.093318674                                               | 7.343871128                                |
| 6.151504723                                | 75.82523319                                    | 0.126025547                                               | 7.154046713                                |
| 6.201488951                                | 69.13748597                                    | 0.113560471                                               | 6.805068806                                |
| 12.50978996                                | 85.88679245                                    | 0.091491634                                               | 4.508501766                                |
| 13.59760802                                | 133.3784722                                    | 0.078426408                                               | 6.71533114                                 |
| 23.81823129                                | 167.1333333                                    | 0.061950113                                               | 5.280878913                                |
| 15.61152234                                | 130.9059706                                    | 0.078567887                                               | 7.173828501                                |
| 16.21761455                                | 83.5034965                                     | 0.07653186                                                | 5.37202512                                 |
| 9.876732651                                | 101.9810268                                    | 0.088025151                                               | 6.995457124                                |
| 10.72713378                                | 118.2031551                                    | 0.085325534                                               | 6.98406543                                 |
| 12.94314891                                | 92.39506173                                    | 0.08380069                                                | 6.296442931                                |
| 7.791876746                                | 156.6097492                                    | 0.131373713                                               | 6.992999396                                |
| 6.398127903                                | 80.30035075                                    | 0.151876324                                               | 7.04236832                                 |
| 6.607060473                                | 139.8291205                                    | 0.186906426                                               | 7.096167229                                |
| 10.10073096                                | 151.5269058                                    | 0.063926482                                               | 6.135080974                                |
| 10.55099646                                | 72.11842105                                    | 0.090104648                                               | 6.074735713                                |
| 14.01959104                                | 57.37946429                                    | 0.086455676                                               | 5.549221817                                |
| 9.631027545                                | 97.45235487                                    | 0.092639002                                               | 6.468542574                                |
| 8.968840814                                | 195.8409763                                    | 0.103361829                                               | 6.921910972                                |
| 20.04828611                                | 149.6107383                                    | 0.065357416                                               | 5.409618796                                |
| 16.74294497                                | 158.3942197                                    | 0.070832971                                               | 6.649578795                                |
| 10.44759735                                | 220.6122946                                    | 0.109490616                                               | 7.257941316                                |
| 9.798126951                                | 66.29032258                                    | 0.100936524                                               | 4.438067278                                |
| 6.463572851                                | 109.0312374                                    | 0.126027702                                               | 7.070573143                                |
| 7.052508857                                | 69.23609923                                    | 0.107734265                                               | 6.871675717                                |
| 13.88803903                                | 70.40547945                                    | 0.082094202                                               | 6.046765527                                |
| 25.94153712                                | 281.0730051                                    | 0.05875401                                                | 6.176370802                                |
| 5.2096                                     | 47.2                                           | 0.1312                                                    | 4.57366069                                 |
| 9.017751479                                | 39.69230769                                    | 0.112426036                                               | 3.238901257                                |
| 13.94467905                                | 243.0842811                                    | 0.091334687                                               | 7.207846694                                |
| 18.1348576                                 | 62.06907895                                    | 0.080786877                                               | 6.061247981                                |
| 8.502906574                                | 52.87259615                                    | 0.095356416                                               | 6.115598615                                |
| 9.948939665                                | 134.1322563                                    | 0.089237814                                               | 7.188492447                                |
| 7.941556945                                | 115.2914705                                    | 0.133349352                                               | 7.113771684                                |
| 27.1101033                                 | 224                                            | 0.066263542                                               | 4.953004923                                |
| 21.51452422                                | 155.0529412                                    | 0.061613322                                               | 6.455489959                                |
| 6.138888889                                | 23.5                                           | 0.135416667                                               | 3.386842188                                |
| 27.43324928                                | 169.2331288                                    | 0.058301028                                               | 5.688700931                                |
| 15.07998724                                | 138.2107143                                    | 0.075535714                                               | 6.248227543                                |

| log.sigma.4.5.mm.3D_gldm_DependenceNonUniformity | log.sigma.4.5.mm.3D_gldm_GrayLevelNonUniformity | log.sigma.4.5.mm.3D_gldm_SmallDependenceEmphasis |
|--------------------------------------------------|-------------------------------------------------|--------------------------------------------------|
| 63.02216066                                      | 22.86149584                                     | 0.245478677                                      |
| 132.3114754                                      | 127.9836066                                     | 0.115236164                                      |
| 30.92090395                                      | 16.24293785                                     | 0.32640129                                       |
| 239.7656492                                      | 132.4236937                                     | 0.223878281                                      |
| 31.35643564                                      | 5.138613861                                     | 0.475368537                                      |
| 40.98360656                                      | 22.27868852                                     | 0.247247779                                      |
| 14.02857143                                      | 8.285714286                                     | 0.27922619                                       |
| 76.65586035                                      | 24.74064838                                     | 0.346597601                                      |
| 296.4403794                                      | 54.31436314                                     | 0.312089493                                      |
| 206.2100043                                      | 217.800345                                      | 0.121581039                                      |
| 61.69680851                                      | 31.53723404                                     | 0.267710067                                      |
| 100.664465                                       | 56.53764861                                     | 0.203656779                                      |
| 152.4699854                                      | 132.9707174                                     | 0.171016646                                      |
| 83.33333333                                      | 36.25757576                                     | 0.264124296                                      |
| 66.59340659                                      | 25.31868132                                     | 0.296046118                                      |
| 432.3952715                                      | 2459.451422                                     | 0.04449305                                       |
| 53.75576037                                      | 14.23502304                                     | 0.399923678                                      |
| 165.4368557                                      | 136.8376289                                     | 0.186434071                                      |
| 47.73626374                                      | 9.307692308                                     | 0.444752747                                      |
| 203.3496756                                      | 274.5832733                                     | 0.084417156                                      |
| 298.4947783                                      | 672.5215764                                     | 0.06955326                                       |
| 118.7293729                                      | 71.71507151                                     | 0.208221561                                      |
| 196.0767123                                      | 339.5938356                                     | 0.091870983                                      |
| 37.4962406                                       | 7.060150376                                     | 0.427032164                                      |
| 85.48958333                                      | 109.5791667                                     | 0.122754171                                      |
| 54.58278146                                      | 25.23178808                                     | 0.248454981                                      |
| 158.1716907                                      | 304.7946702                                     | 0.098626961                                      |
| 202.9620026                                      | 593.6741977                                     | 0.069384867                                      |
| 250.4542519                                      | 446.4580194                                     | 0.122431422                                      |
| 153.1039575                                      | 142.0584761                                     | 0.113683269                                      |
| 264.4744109                                      | 525.660795                                      | 0.074564623                                      |
| 408.7282916                                      | 1392.719688                                     | 0.079265644                                      |
| 181.0820734                                      | 96.61843053                                     | 0.201201687                                      |
| 7.8                                              | 1.4                                             | 0.7                                              |
| 35.77876106                                      | 7.442477876                                     | 0.389550147                                      |
| 177.2713643                                      | 110.3673163                                     | 0.204683629                                      |
| 316.878643                                       | 1059.751756                                     | 0.067008385                                      |
| 241.7255937                                      | 268.6530343                                     | 0.106523326                                      |
| 66.80685358                                      | 18.13395639                                     | 0.295784225                                      |
| 78.97392924                                      | 38.10242086                                     | 0.230360009                                      |
| 85.24335664                                      | 58.5972028                                      | 0.167598339                                      |
| 65.92913386                                      | 27.6351706                                      | 0.339158107                                      |
| 121.6286408                                      | 70.54854369                                     | 0.245289109                                      |
| 81.20501139                                      | 27.91116173                                     | 0.31258622                                       |
| 157.032287                                       | 83.47892377                                     | 0.216480486                                      |
| 255.299902                                       | 1298.446259                                     | 0.034205593                                      |
| 402.9344501                                      | 185.9213401                                     | 0.227316304                                      |
| 39.47368421                                      | 17.44736842                                     | 0.313041248                                      |
| 10.72727273                                      | 2.272727273                                     | 0.441919192                                      |
| 49.42465753                                      | 6.876712329                                     | 0.495089422                                      |
| 247.8764706                                      | 515.029902                                      | 0.083879124                                      |
| 52.6426799                                       | 41.72456576                                     | 0.247358193                                      |
| 327.4143975                                      | 269.4250391                                     | 0.144132318                                      |
| 43.08368201                                      | 18.78242678                                     | 0.203808416                                      |
| 469.0325491                                      | 2210.243764                                     | 0.054713154                                      |
| 77.93731343                                      | 20.42089552                                     | 0.355790139                                      |
| 174.5848624                                      | 62.18577982                                     | 0.339131236                                      |
| 123.9868996                                      | 22.80349345                                     | 0.402081192                                      |
| 57.20903955                                      | 26.25423729                                     | 0.259403485                                      |
| 62.02575107                                      | 37.32188841                                     | 0.174545017                                      |
| 172.1793814                                      | 138.7910653                                     | 0.176785171                                      |
| 455.1664699                                      | 632.3273318                                     | 0.126926693                                      |
| 243.742759                                       | 513.4280805                                     | 0.081064056                                      |
| 143.1919192                                      | 202.3647587                                     | 0.096925495                                      |
| 16.01886792                                      | 4.849056604                                     | 0.496331237                                      |
| 154.4357639                                      | 90.34722222                                     | 0.220192524                                      |
| 30.82857143                                      | 6.504761905                                     | 0.468007937                                      |
| 302.3642919                                      | 272.3948659                                     | 0.12584839                                       |
| 31.64335664                                      | 10.94405594                                     | 0.375529639                                      |
| 168.2332589                                      | 157.7410714                                     | 0.150920452                                      |
| 258.3035783                                      | 221.7610619                                     | 0.152359252                                      |
| 79.670194                                        | 47.51499118                                     | 0.224804047                                      |
| 372.3748052                                      | 927.1042936                                     | 0.069708582                                      |
| 486.9209895                                      | 1645.428097                                     | 0.052597447                                      |
| 593.717267                                       | 2713.6944                                       | 0.066800782                                      |
| 88.26008969                                      | 28.51121076                                     | 0.336571853                                      |
| 71.07894737                                      | 41.0877193                                      | 0.268730226                                      |
| 40.58035714                                      | 19.36607143                                     | 0.297683355                                      |
| 115.4315444                                      | 84.57940854                                     | 0.214136062                                      |
| 203.5525148                                      | 279.4903846                                     | 0.121028149                                      |
| 39.96644295                                      | 9.738255034                                     | 0.476020636                                      |
| 127.5156069                                      | 61.27052023                                     | 0.269308132                                      |
| 329.7660783                                      | 539.6792453                                     | 0.113483246                                      |
| 11.06451613                                      | 3.129032258                                     | 0.461191756                                      |
| 301.146715                                       | 625.3494559                                     | 0.087509142                                      |
| 319.540633                                       | 377.8240662                                     | 0.133199358                                      |
| 56.58356164                                      | 29.96438356                                     | 0.267374867                                      |
| 138.9286927                                      | 34.60611205                                     | 0.373999177                                      |
| 10.52                                            | 6.56                                            | 0.332497052                                      |
| 9.615384615                                      | 1.461538462                                     | 0.884615385                                      |
| 272.5707203                                      | 313.1866433                                     | 0.140674325                                      |
| 49.60526316                                      | 24.55921053                                     | 0.280213409                                      |
| 58.26442308                                      | 39.68826923                                     | 0.174574883                                      |
| 283.3893757                                      | 325.8964951                                     | 0.095487739                                      |
| 370.2171144                                      | 963.0490169                                     | 0.066384376                                      |
| 22.17460317                                      | 4.174603175                                     | 0.51675485                                       |
| 120.1205882                                      | 41.89705882                                     | 0.268306963                                      |
| 6.416666667                                      | 3.25                                            | 0.334490741                                      |
| 38.27607362                                      | 9.503067485                                     | 0.40810668                                       |
| 43.27142857                                      | 21.15                                           | 0.269081529                                      |

| log.sigma.4.5.mm.3D_gldm_DependenceNonUniformityNormalized | log.sigma.4.5.mm.3D_gldm_DependenceVariance | log.sigma.4.5.mm.3D_gldm_LargeDependenceEmphasis |
|------------------------------------------------------------|---------------------------------------------|--------------------------------------------------|
| 0.174576622                                                | 3.179195985                                 | 14.06371191                                      |
| 0.094306112                                                | 17.05722642                                 | 53.47754811                                      |
| 0.174694373                                                | 4.094608829                                 | 13.92655367                                      |
| 0.124038101                                                | 8.243813912                                 | 26.27884118                                      |
| 0.310459759                                                | 0.98009999                                  | 5.01980198                                       |
| 0.167965601                                                | 5.387664606                                 | 17.92622951                                      |
| 0.200408163                                                | 2.025306122                                 | 10.68571429                                      |
| 0.191161747                                                | 2.994322175                                 | 11.319202                                        |
| 0.200840365                                                | 2.718190231                                 | 11.00135501                                      |
| 0.088921951                                                | 13.62073138                                 | 48.98706339                                      |
| 0.164087257                                                | 6.210955183                                 | 18.7606383                                       |
| 0.132978157                                                | 6.076688032                                 | 23.14002642                                      |
| 0.111617852                                                | 7.380182598                                 | 29.49633968                                      |
| 0.157828283                                                | 5.382217057                                 | 18.08712121                                      |
| 0.182948919                                                | 2.915137061                                 | 12.21428571                                      |
| 0.039933069                                                | 60.86875289                                 | 256.2589583                                      |
| 0.247722398                                                | 1.900911041                                 | 7.709677419                                      |
| 0.106595912                                                | 8.700404865                                 | 31.99097938                                      |
| 0.262287163                                                | 1.512981524                                 | 6.538461538                                      |
| 0.073305579                                                | 22.69927938                                 | 77.5147801                                       |
| 0.058816705                                                | 40.79513116                                 | 126.800197                                       |
| 0.130615372                                                | 8.73893506                                  | 27.02420242                                      |
| 0.067149559                                                | 25.77421655                                 | 86.52876712                                      |
| 0.281926621                                                | 1.00514444                                  | 5.661654135                                      |
| 0.089051649                                                | 13.13766927                                 | 48.61458333                                      |
| 0.180737687                                                | 3.005876935                                 | 13.45033113                                      |
| 0.069100782                                                | 25.06169629                                 | 82.3088685                                       |
| 0.052108345                                                | 52.60172757                                 | 157.1766367                                      |
| 0.067398884                                                | 46.42039949                                 | 114.4251884                                      |
| 0.090433525                                                | 23.80224258                                 | 65.97932664                                      |
| 0.062955109                                                | 40.39563856                                 | 119.98786                                        |
| 0.046272874                                                | 53.72897847                                 | 166.063059                                       |
| 0.130368663                                                | 7.320465594                                 | 24.91936645                                      |
| 0.52                                                       | 0.24                                        | 2.2                                              |
| 0.316626204                                                | 0.83577414                                  | 5.460176991                                      |
| 0.13288708                                                 | 5.284951977                                 | 21.5862069                                       |
| 0.047358936                                                | 52.88297999                                 | 171.1043192                                      |
| 0.0797248                                                  | 23.38527301                                 | 70.37467018                                      |
| 0.208121039                                                | 1.861433798                                 | 9.809968847                                      |
| 0.147065045                                                | 4.406520812                                 | 18.04283054                                      |
| 0.119221478                                                | 7.345446721                                 | 28.47972028                                      |
| 0.173042346                                                | 6.382086098                                 | 17.79265092                                      |
| 0.147607574                                                | 6.098430578                                 | 20.32524272                                      |
| 0.184977247                                                | 4.68836297                                  | 14.69931663                                      |
| 0.140836132                                                | 5.482635887                                 | 20.66816143                                      |
| 0.041702042                                                | 51.62454912                                 | 218.5161712                                      |
| 0.146735051                                                | 4.63254398                                  | 18.51128915                                      |
| 0.173130194                                                | 4.649738381                                 | 15.07017544                                      |
| 0.487603306                                                | 0.330578512                                 | 3.636363636                                      |
| 0.338525052                                                | 0.771626947                                 | 4.397260274                                      |
| 0.060754037                                                | 46.07325163                                 | 127.3735294                                      |
| 0.130626997                                                | 7.400205654                                 | 23.73945409                                      |
| 0.10247712                                                 | 14.51413628                                 | 44.14929577                                      |
| 0.180266452                                                | 2.566411652                                 | 14.53974895                                      |
| 0.041485278                                                | 60.23958399                                 | 211.5430745                                      |
| 0.232648697                                                | 1.959313878                                 | 8.534328358                                      |
| 0.200211998                                                | 2.673343995                                 | 10.58027523                                      |
| 0.270713755                                                | 1.278389047                                 | 6.414847162                                      |
| 0.161607456                                                | 3.528360305                                 | 15.0960452                                       |
| 0.13310247                                                 | 5.064027704                                 | 22.68240343                                      |
| 0.118336345                                                | 8.391025141                                 | 29.88109966                                      |
| 0.067173328                                                | 36.45477501                                 | 96.33441558                                      |
| 0.059828856                                                | 28.9077385                                  | 100.9950908                                      |
| 0.080354612                                                | 22.00078475                                 | 69.65881033                                      |
| 0.302242791                                                | 0.961908152                                 | 5.037735849                                      |
| 0.134058823                                                | 5.636959877                                 | 21.52604167                                      |
| 0.293605442                                                | 1.071746032                                 | 5.342857143                                      |
| 0.087212083                                                | 25.87596398                                 | 67.47418517                                      |
| 0.221282214                                                | 2.364125385                                 | 9.167832168                                      |
| 0.093880167                                                | 13.99414934                                 | 45.37165179                                      |
| 0.099385755                                                | 11.39156727                                 | 39.90034629                                      |
| 0.140511806                                                | 4.31091577                                  | 18.89065256                                      |
| 0.052766729                                                | 45.18533742                                 | 142.7712909                                      |
| 0.044943787                                                | 55.87175708                                 | 189.3324718                                      |
| 0.040892435                                                | 62.94692381                                 | 212.024313                                       |
| 0.197892578                                                | 2.769088459                                 | 10.85201794                                      |
| 0.155874885                                                | 6.938577255                                 | 20.35087719                                      |
| 0.181162309                                                | 4.239795918                                 | 14.57142857                                      |
| 0.126431045                                                | 6.134110074                                 | 23.35706462                                      |
| 0.075278297                                                | 36.86381287                                 | 91.25443787                                      |
| 0.268231161                                                | 1.579568488                                 | 6.395973154                                      |
| 0.147416887                                                | 4.628425941                                 | 17.39768786                                      |
| 0.066903242                                                | 35.47242279                                 | 96.80969771                                      |
| 0.356919875                                                | 0.869927159                                 | 4.741935484                                      |
| 0.060690592                                                | 38.00135719                                 | 112.3389762                                      |
| 0.091115094                                                | 12.43076713                                 | 45.06102082                                      |
| 0.155023457                                                | 4.348313004                                 | 16.4739726                                       |
| 0.235872144                                                | 2.66588647                                  | 9.387096774                                      |
| 0.2104                                                     | 2.3024                                      | 9.92                                             |
| 0.73964497                                                 | 0.130177515                                 | 1.461538462                                      |
| 0.079489857                                                | 36.87507298                                 | 87.22338874                                      |
| 0.163175208                                                | 4.492685249                                 | 16.15131579                                      |
| 0.140058709                                                | 5.164571006                                 | 22.10096154                                      |
| 0.077598405                                                | 21.77443259                                 | 71.69879518                                      |
| 0.051262409                                                | 50.47403542                                 | 155.9471061                                      |
| 0.351977828                                                | 0.58856135                                  | 3.920634921                                      |
| 0.176647924                                                | 2.955285467                                 | 13.17647059                                      |
| 0.267361111                                                | 0.993055556                                 | 6.833333333                                      |
| 0.234822538                                                | 2.089728631                                 | 8.202453988                                      |
| 0.154540816                                                | 4.556938776                                 | 16.90714286                                      |

|                                                              |                                                               |                                                               |
|--------------------------------------------------------------|---------------------------------------------------------------|---------------------------------------------------------------|
| log.sigma.4.5.mm.3D_gldm_LargeDependenceLowGrayLevelEmphasis | log.sigma.4.5.mm.3D_gldm_SmallDependenceHighGrayLevelEmphasis | log.sigma.4.5.mm.3D_gldm_LargeDependenceHighGrayLevelEmphasis |
| 0.26471037                                                   | 38.09445006                                                   | 1913.792244                                                   |
| 0.570977795                                                  | 14.65772132                                                   | 8184.777619                                                   |
| 1.352557027                                                  | 32.49984557                                                   | 539.5536723                                                   |
| 0.155715631                                                  | 64.78032207                                                   | 5973.466632                                                   |
| 0.104255901                                                  | 127.3629675                                                   | 723.2871287                                                   |
| 2.113826529                                                  | 21.89565739                                                   | 450.5901639                                                   |
| 1.442003507                                                  | 13.89432143                                                   | 203.4571429                                                   |
| 0.685035332                                                  | 59.50565499                                                   | 640.8004988                                                   |
| 0.118763697                                                  | 126.2356705                                                   | 5345.852304                                                   |
| 0.389957999                                                  | 22.32828473                                                   | 7660.421734                                                   |
| 1.299107658                                                  | 28.34592279                                                   | 556.1276596                                                   |
| 0.493967222                                                  | 29.5092806                                                    | 2198.140026                                                   |
| 1.561314432                                                  | 19.36212782                                                   | 1090.036603                                                   |
| 0.548427638                                                  | 43.47830589                                                   | 1134.4375                                                     |
| 0.583342733                                                  | 47.58738248                                                   | 796.3653846                                                   |
| 1.284796524                                                  | 8.780078221                                                   | 52697.61286                                                   |
| 0.637340026                                                  | 61.64448862                                                   | 517.875576                                                    |
| 0.842956019                                                  | 26.28346181                                                   | 2343.195876                                                   |
| 0.721291201                                                  | 107.2759646                                                   | 815.6263736                                                   |
| 1.069534148                                                  | 7.573565009                                                   | 8902.788392                                                   |
| 0.961040907                                                  | 8.262343619                                                   | 18898.90049                                                   |
| 0.769279047                                                  | 30.3982936                                                    | 1821.559956                                                   |
| 0.527932893                                                  | 15.34207609                                                   | 16725.89144                                                   |
| 0.299019507                                                  | 87.0733208                                                    | 1302.421053                                                   |
| 1.245839335                                                  | 10.46391706                                                   | 3664.6125                                                     |
| 0.479470874                                                  | 28.36617038                                                   | 978.7251656                                                   |
| 0.826955675                                                  | 13.09664932                                                   | 9731.949323                                                   |
| 1.202132765                                                  | 7.778041483                                                   | 24993.18151                                                   |
| 0.479807265                                                  | 25.49846213                                                   | 30989.17707                                                   |
| 0.43729512                                                   | 15.9637484                                                    | 13927.62847                                                   |
| 0.942976206                                                  | 9.855564782                                                   | 18200.48393                                                   |
| 1.165303139                                                  | 13.10333349                                                   | 26697.7952                                                    |
| 0.417854006                                                  | 33.69908685                                                   | 3454.491001                                                   |
| 0.167930618                                                  | 51.93333333                                                   | 152.9333333                                                   |
| 0.13307522                                                   | 74.01904867                                                   | 671.3185841                                                   |
| 0.446222446                                                  | 31.65114353                                                   | 1903.955022                                                   |
| 1.102679567                                                  | 8.489053705                                                   | 29680.40009                                                   |
| 0.825556829                                                  | 14.42778099                                                   | 9129.270778                                                   |
| 0.207144466                                                  | 69.46266788                                                   | 1543.358255                                                   |
| 0.848996375                                                  | 24.97108663                                                   | 1299.459963                                                   |
| 0.213792716                                                  | 30.89526909                                                   | 5625.723077                                                   |
| 0.40446482                                                   | 65.73813164                                                   | 1121.102362                                                   |
| 0.449393388                                                  | 34.72132798                                                   | 1342.799757                                                   |
| 0.630437451                                                  | 51.84633317                                                   | 778.9635535                                                   |
| 0.522615264                                                  | 30.43770234                                                   | 1635.265471                                                   |
| 2.319304464                                                  | 2.342593019                                                   | 22940.85348                                                   |
| 0.246431417                                                  | 51.47999251                                                   | 2379.084487                                                   |
| 1.48888601                                                   | 36.40902724                                                   | 407.9736842                                                   |
| 0.475459606                                                  | 38.17929293                                                   | 174.2272727                                                   |
| 0.07293421                                                   | 150.9997698                                                   | 1036.90411                                                    |
| 0.962675159                                                  | 10.64019957                                                   | 19999.86814                                                   |
| 1.406309986                                                  | 23.34590897                                                   | 680.3870968                                                   |
| 0.361579545                                                  | 22.61557744                                                   | 7962.485759                                                   |
| 0.750469028                                                  | 24.58084406                                                   | 1212.23431                                                    |
| 1.545343779                                                  | 6.631530591                                                   | 31367.9127                                                    |
| 0.230846614                                                  | 67.98448782                                                   | 901.9432836                                                   |
| 0.161672285                                                  | 69.85883946                                                   | 1120.954128                                                   |
| 0.151410969                                                  | 129.9060837                                                   | 1505.59607                                                    |
| 0.851985883                                                  | 33.64687905                                                   | 1009.220339                                                   |
| 0.82145327                                                   | 19.37686803                                                   | 1588.832618                                                   |
| 0.680314966                                                  | 19.66541665                                                   | 2658.727835                                                   |
| 0.398858974                                                  | 34.29038927                                                   | 26847.47772                                                   |
| 1.613393991                                                  | 6.930790963                                                   | 8608.978891                                                   |
| 1.179968746                                                  | 7.009755691                                                   | 6223.999439                                                   |
| 0.1955943                                                    | 50.99292453                                                   | 372.3018868                                                   |
| 0.370559675                                                  | 36.15708413                                                   | 2986.199653                                                   |
| 0.185406873                                                  | 95.85901587                                                   | 692.447619                                                    |
| 0.644328358                                                  | 17.72465881                                                   | 12362.42832                                                   |
| 0.975508968                                                  | 45.22231086                                                   | 360.4125874                                                   |
| 0.61573478                                                   | 17.4169342                                                    | 5774.787946                                                   |
| 0.468048514                                                  | 21.32952813                                                   | 5668.221624                                                   |
| 0.546407349                                                  | 32.14202967                                                   | 1252.86067                                                    |
| 0.803073139                                                  | 10.39005901                                                   | 28441.05867                                                   |
| 2.367598038                                                  | 3.589322181                                                   | 19316.1726                                                    |
| 1.462254584                                                  | 10.89677101                                                   | 33342.99229                                                   |
| 0.209377558                                                  | 68.31456362                                                   | 1088.042601                                                   |
| 0.844958797                                                  | 29.24552152                                                   | 786.5657895                                                   |
| 1.789802342                                                  | 30.28505808                                                   | 312.1473214                                                   |
| 0.374069574                                                  | 27.73217808                                                   | 2220.998905                                                   |
| 0.408447736                                                  | 26.0551579                                                    | 23136.99482                                                   |
| 0.11396059                                                   | 88.29003542                                                   | 657.9328859                                                   |
| 0.21333798                                                   | 53.74226106                                                   | 2289.564162                                                   |
| 0.409712117                                                  | 26.63249749                                                   | 25418.39197                                                   |
| 0.17446934                                                   | 33.04771505                                                   | 261.5806452                                                   |
| 0.981361476                                                  | 10.87997636                                                   | 15177.74587                                                   |
| 1.086712885                                                  | 13.22328583                                                   | 2779.577131                                                   |
| 1.085173881                                                  | 30.56734966                                                   | 706.5808219                                                   |
| 0.069181065                                                  | 129.1585447                                                   | 1850.278438                                                   |
| 0.42447119                                                   | 18.88358186                                                   | 317.88                                                        |
| 0.184853318                                                  | 38.65384615                                                   | 43.84615385                                                   |
| 0.31798811                                                   | 35.4196285                                                    | 27562.02275                                                   |
| 3.467480114                                                  | 29.1347459                                                    | 436.4835526                                                   |
| 1.656633308                                                  | 12.11048691                                                   | 1131.829327                                                   |
| 0.547351642                                                  | 12.49095837                                                   | 12393.24343                                                   |
| 1.282301631                                                  | 7.845148228                                                   | 21988.23719                                                   |
| 0.054543218                                                  | 135.2751323                                                   | 706.0952381                                                   |
| 0.293256097                                                  | 57.79043029                                                   | 1532.847059                                                   |
| 2.58803305                                                   | 12.0306713                                                    | 93.83333333                                                   |
| 0.189213926                                                  | 78.1314758                                                    | 1230.263804                                                   |
| 0.21783729                                                   | 39.97145542                                                   | 2306.403571                                                   |

| log.sigma.4.5.mm.3D_gldm_SmallDependenceLowGrayLevelEmphasis | log.sigma.4.5.mm.3D_gldm_LowGrayLevelEmphasis | log.sigma.4.5.mm.3D_gldm_DistanceZoneVariabilityNormalized |
|--------------------------------------------------------------|-----------------------------------------------|------------------------------------------------------------|
| 0.004703481                                                  | 0.023075918                                   | 0.9802                                                     |
| 0.00200562                                                   | 0.018576251                                   | 0.986302021                                                |
| 0.008976807                                                  | 0.049470823                                   | 1                                                          |
| 0.001762998                                                  | 0.007277494                                   | 0.900706283                                                |
| 0.016842512                                                  | 0.024826892                                   | 0.900277008                                                |
| 0.01090482                                                   | 0.060854179                                   | 0.944489796                                                |
| 0.015252223                                                  | 0.111960806                                   | 1                                                          |
| 0.009803522                                                  | 0.045821197                                   | 0.963203125                                                |
| 0.00283388                                                   | 0.009299402                                   | 0.525943404                                                |
| 0.001518202                                                  | 0.01015921                                    | 0.956385346                                                |
| 0.006651467                                                  | 0.057280917                                   | 0.951369442                                                |
| 0.004766763                                                  | 0.024760331                                   | 0.9753125                                                  |
| 0.006327609                                                  | 0.052281325                                   | 0.90506113                                                 |
| 0.004671183                                                  | 0.023327616                                   | 0.975613474                                                |
| 0.006296356                                                  | 0.02764093                                    | 0.955578512                                                |
| 0.000374737                                                  | 0.006555796                                   | 0.976680969                                                |
| 0.012767297                                                  | 0.043926603                                   | 0.963315573                                                |
| 0.003134247                                                  | 0.023830582                                   | 0.928437728                                                |
| 0.00788503                                                   | 0.046304008                                   | 0.904091419                                                |
| 0.001994918                                                  | 0.021116852                                   | 0.949273003                                                |
| 0.001212611                                                  | 0.011833968                                   | 0.960684761                                                |
| 0.00458461                                                   | 0.02365836                                    | 0.921528926                                                |
| 0.001033531                                                  | 0.009663359                                   | 1                                                          |
| 0.00822438                                                   | 0.036222031                                   | 1                                                          |
| 0.003504463                                                  | 0.037466105                                   | 1                                                          |
| 0.005244295                                                  | 0.035538151                                   | 0.955578512                                                |
| 0.001436781                                                  | 0.0142937                                     | 0.981396989                                                |
| 0.001546118                                                  | 0.015288125                                   | 1                                                          |
| 0.001285863                                                  | 0.007560111                                   | 0.964620629                                                |
| 0.002131772                                                  | 0.012586684                                   | 0.946277586                                                |
| 0.001101681                                                  | 0.012847515                                   | 0.962243655                                                |
| 0.000846624                                                  | 0.011056073                                   | 0.969976948                                                |
| 0.003526894                                                  | 0.018979468                                   | 0.918567744                                                |
| 0.098698759                                                  | 0.112545131                                   | 1                                                          |
| 0.014679681                                                  | 0.025586177                                   | 0.964923469                                                |
| 0.0033236                                                    | 0.021784106                                   | 0.867988655                                                |
| 0.001105987                                                  | 0.010953937                                   | 0.952417823                                                |
| 0.001632144                                                  | 0.017424644                                   | 0.97288648                                                 |
| 0.005886815                                                  | 0.019393887                                   | 0.905                                                      |
| 0.006998213                                                  | 0.04062244                                    | 0.942906574                                                |
| 0.002946422                                                  | 0.01128036                                    | 1                                                          |
| 0.005907276                                                  | 0.018632898                                   | 0.935967721                                                |
| 0.004570943                                                  | 0.02127041                                    | 0.940504567                                                |
| 0.0068031                                                    | 0.035715319                                   | 0.987879239                                                |
| 0.004222598                                                  | 0.026224592                                   | 0.811805184                                                |
| 0.000982145                                                  | 0.016353251                                   | 0.986487112                                                |
| 0.002139934                                                  | 0.012633017                                   | 0.659090502                                                |
| 0.006473323                                                  | 0.060512464                                   | 0.95240928                                                 |
| 0.032001882                                                  | 0.11937004                                    | 1                                                          |
| 0.012374288                                                  | 0.017783164                                   | 0.91322314                                                 |
| 0.001541712                                                  | 0.013828521                                   | 0.96287726                                                 |
| 0.005593757                                                  | 0.052649081                                   | 0.948884688                                                |
| 0.00209309                                                   | 0.013488263                                   | 0.884936355                                                |
| 0.004564383                                                  | 0.045198008                                   | 0.966676242                                                |
| 0.000764916                                                  | 0.010858083                                   | 0.954755917                                                |
| 0.00649385                                                   | 0.020225806                                   | 0.932966821                                                |
| 0.003953624                                                  | 0.012482525                                   | 0.988506131                                                |
| 0.005281826                                                  | 0.018880459                                   | 0.89066486                                                 |
| 0.006930593                                                  | 0.043857067                                   | 0.962278107                                                |
| 0.004073719                                                  | 0.032334259                                   | 1                                                          |
| 0.004306813                                                  | 0.028031597                                   | 0.8858936                                                  |
| 0.000878657                                                  | 0.006794173                                   | 0.910929274                                                |
| 0.002018165                                                  | 0.025907328                                   | 1                                                          |
| 0.003125566                                                  | 0.028241566                                   | 0.962976148                                                |
| 0.028405303                                                  | 0.048817208                                   | 0.939453125                                                |
| 0.002950314                                                  | 0.018623037                                   | 0.929679339                                                |
| 0.009318647                                                  | 0.032855671                                   | 0.967222222                                                |
| 0.002080626                                                  | 0.018645823                                   | 0.841814059                                                |
| 0.009490675                                                  | 0.053850523                                   | 0.969704142                                                |
| 0.003068758                                                  | 0.01914674                                    | 0.954502765                                                |
| 0.002393965                                                  | 0.017241224                                   | 0.964923469                                                |
| 0.00476973                                                   | 0.025133108                                   | 0.971836735                                                |
| 0.000820505                                                  | 0.008738306                                   | 0.954798078                                                |
| 0.002088433                                                  | 0.025872939                                   | 0.985982007                                                |
| 0.000824942                                                  | 0.010730986                                   | 0.91498932                                                 |
| 0.004645166                                                  | 0.019211649                                   | 0.977014602                                                |
| 0.006266759                                                  | 0.033287791                                   | 0.959476813                                                |
| 0.013443422                                                  | 0.076287534                                   | 1                                                          |
| 0.004066785                                                  | 0.021195822                                   | 0.94155                                                    |
| 0.001013268                                                  | 0.007475584                                   | 0.957351182                                                |
| 0.015114306                                                  | 0.022766805                                   | 0.954048443                                                |
| 0.004254227                                                  | 0.013356888                                   | 0.977102309                                                |
| 0.000839215                                                  | 0.006586698                                   | 0.884827603                                                |
| 0.04980365                                                   | 0.063689922                                   | 1                                                          |
| 0.001378566                                                  | 0.013625611                                   | 0.96899563                                                 |
| 0.003099528                                                  | 0.026343606                                   | 0.978168599                                                |
| 0.008696038                                                  | 0.05318624                                    | 0.965822306                                                |
| 0.004269399                                                  | 0.008216268                                   | 0.927112029                                                |
| 0.029996592                                                  | 0.051824188                                   | 1                                                          |
| 0.120750754                                                  | 0.133571267                                   | 0.722222222                                                |
| 0.001266047                                                  | 0.006275623                                   | 0.943044181                                                |
| 0.012336924                                                  | 0.110601898                                   | 0.9418                                                     |
| 0.007125527                                                  | 0.064253515                                   | 0.95125                                                    |
| 0.001705566                                                  | 0.012027491                                   | 0.974607376                                                |
| 0.001098238                                                  | 0.013818631                                   | 0.958892623                                                |
| 0.019867656                                                  | 0.024148305                                   | 1                                                          |
| 0.003346287                                                  | 0.019004928                                   | 0.9232                                                     |
| 0.030102398                                                  | 0.235988297                                   | 1                                                          |
| 0.008936942                                                  | 0.027292697                                   | 1                                                          |
| 0.011042482                                                  | 0.022344128                                   | 0.978497164                                                |

| log.sigma.4.5.mm.3D_gldzm_LowIntensityEmphasis | log.sigma.4.5.mm.3D_gldzm_LargeDistanceEmphasis | log.sigma.4.5.mm.3D_gldzm_HighIntensitySmallDistanceEmphasis |
|------------------------------------------------|-------------------------------------------------|--------------------------------------------------------------|
| 0.024382356                                    | 1.03                                            | 157.7325                                                     |
| 0.023582408                                    | 1.020689655                                     | 131.5051724                                                  |
| 0.035528418                                    | 1                                               | 98.14925373                                                  |
| 0.008032713                                    | 1.188720174                                     | 290.23349                                                    |
| 0.031775981                                    | 1.157894737                                     | 258.2763158                                                  |
| 0.047503886                                    | 1.085714286                                     | 89.55                                                        |
| 0.076036317                                    | 1                                               | 49                                                           |
| 0.034258475                                    | 1.05625                                         | 167.2109375                                                  |
| 0.009272439                                    | 2.288848263                                     | 219.9435938                                                  |
| 0.013880206                                    | 1.066914498                                     | 189.0250929                                                  |
| 0.037263999                                    | 1.115702479                                     | 104.1528926                                                  |
| 0.029738468                                    | 1.0375                                          | 145.6828125                                                  |
| 0.0444245                                      | 1.190082645                                     | 119.0632461                                                  |
| 0.018043539                                    | 1.037037037                                     | 165.6450617                                                  |
| 0.021324704                                    | 1.068181818                                     | 154.4886364                                                  |
| 0.010555627                                    | 1.058823529                                     | 207.4926797                                                  |
| 0.03466348                                     | 1.056074766                                     | 147.6588785                                                  |
| 0.016218525                                    | 1.111486486                                     | 146.2204392                                                  |
| 0.02655134                                     | 1.151515152                                     | 222.3686869                                                  |
| 0.026702192                                    | 1.078125                                        | 95.12369792                                                  |
| 0.020554701                                    | 1.156146179                                     | 120.8273348                                                  |
| 0.021135219                                    | 1.122727273                                     | 151.5                                                        |
| 0.015197475                                    | 1                                               | 168.3904382                                                  |
| 0.02833594                                     | 1                                               | 196.1285714                                                  |
| 0.043187078                                    | 1                                               | 84.92307692                                                  |
| 0.030596982                                    | 1.068181818                                     | 110.6647727                                                  |
| 0.018636229                                    | 1.028169014                                     | 140.3908451                                                  |
| 0.029845468                                    | 1                                               | 114.4541667                                                  |
| 0.011459903                                    | 1.065168539                                     | 209.5117978                                                  |
| 0.022211013                                    | 1.082872928                                     | 134.4654696                                                  |
| 0.019193599                                    | 1.114942529                                     | 142.9521073                                                  |
| 0.011867602                                    | 1.045731707                                     | 178.008003                                                   |
| 0.019102137                                    | 1.161971831                                     | 169.0401017                                                  |
| 0.12914277                                     | 1                                               | 73.33333333                                                  |
| 0.033316062                                    | 1.053571429                                     | 180.9642857                                                  |
| 0.02162009                                     | 1.321678322                                     | 153.0439005                                                  |
| 0.018636295                                    | 1.086486486                                     | 132.0018769                                                  |
| 0.017720715                                    | 1.041237113                                     | 147.7809278                                                  |
| 0.01950791                                     | 1.15                                            | 222.6666667                                                  |
| 0.03881309                                     | 1.088235294                                     | 103.8419118                                                  |
| 0.018373808                                    | 1                                               | 187.3609023                                                  |
| 0.017026517                                    | 1.099337748                                     | 191.1390728                                                  |
| 0.020018123                                    | 1.113537118                                     | 140.8733624                                                  |
| 0.028148872                                    | 1.018292683                                     | 164.3490854                                                  |
| 0.024681617                                    | 1.332129964                                     | 133.3953069                                                  |
| 0.035541883                                    | 1.020408163                                     | 67.42857143                                                  |
| 0.010887384                                    | 2.21257485                                      | 168.5251996                                                  |
| 0.028800239                                    | 1.073170732                                     | 116.0884146                                                  |
| 0.10241516                                     | 1                                               | 72.92307692                                                  |
| 0.022044249                                    | 1.136363636                                     | 307.8267045                                                  |
| 0.022167412                                    | 1.072327044                                     | 132.0739867                                                  |
| 0.028927049                                    | 1.12173913                                      | 92.35966184                                                  |
| 0.019007658                                    | 1.264573991                                     | 155.2681396                                                  |
| 0.035660373                                    | 1.050847458                                     | 118.3771186                                                  |
| 0.016034825                                    | 1.132692308                                     | 127.4410048                                                  |
| 0.018380204                                    | 1.104166667                                     | 186.0607639                                                  |
| 0.011572047                                    | 1.01734104                                      | 200.3619942                                                  |
| 0.014293599                                    | 1.174107143                                     | 316.3091518                                                  |
| 0.038770589                                    | 1.057692308                                     | 130.6201923                                                  |
| 0.028398679                                    | 1                                               | 117.3666667                                                  |
| 0.031466176                                    | 1.201612903                                     | 109.5433468                                                  |
| 0.007948089                                    | 1.168408827                                     | 275.9826107                                                  |
| 0.032438028                                    | 1                                               | 89.93220339                                                  |
| 0.03907099                                     | 1.056603774                                     | 73.00471698                                                  |
| 0.055790465                                    | 1.09375                                         | 96.2890625                                                   |
| 0.016824324                                    | 1.127272727                                     | 161.9072727                                                  |
| 0.027248494                                    | 1.05                                            | 194.7875                                                     |
| 0.021202279                                    | 1.304761905                                     | 144.5779762                                                  |
| 0.03448904                                     | 1.046153846                                     | 115.2961538                                                  |
| 0.022992421                                    | 1.108108108                                     | 118.242707                                                   |
| 0.020454093                                    | 1.053571429                                     | 143.4502551                                                  |
| 0.021275484                                    | 1.042857143                                     | 145.9946429                                                  |
| 0.012568224                                    | 1.06940874                                      | 160.6793059                                                  |
| 0.053862164                                    | 1.021176471                                     | 72.98470588                                                  |
| 0.014659821                                    | 1.173480663                                     | 173.4004374                                                  |
| 0.017984581                                    | 1.034883721                                     | 199.7936047                                                  |
| 0.027556796                                    | 1.062068966                                     | 106.3827586                                                  |
| 0.046442449                                    | 1                                               | 95.7654321                                                   |
| 0.022117172                                    | 1.115                                           | 130.4751389                                                  |
| 0.010990024                                    | 1.080745342                                     | 215.9760179                                                  |
| 0.028571575                                    | 1.070588235                                     | 177.7205882                                                  |
| 0.016021535                                    | 1.034749035                                     | 203.3957529                                                  |
| 0.009222422                                    | 1.192949907                                     | 235.2805092                                                  |
| 0.090900949                                    | 1                                               | 69.83333333                                                  |
| 0.017296658                                    | 1.146214099                                     | 132.9128489                                                  |
| 0.024844958                                    | 1.033112583                                     | 108.013245                                                   |
| 0.039599087                                    | 1.052173913                                     | 111.9                                                        |
| 0.010350243                                    | 1.113636364                                     | 340.7130682                                                  |
| 0.076522246                                    | 1                                               | 56.52380952                                                  |
| 0.135442946                                    | 1.5                                             | 41.9375                                                      |
| 0.009292239                                    | 1.108559499                                     | 254.3604152                                                  |
| 0.056359987                                    | 1.09                                            | 101.9575                                                     |
| 0.056429506                                    | 1.075                                           | 72.04375                                                     |
| 0.020055904                                    | 1.038585209                                     | 132.6672026                                                  |
| 0.021122277                                    | 1.101827676                                     | 127.0695532                                                  |
| 0.033546439                                    | 1                                               | 250.025641                                                   |
| 0.014853018                                    | 1.12                                            | 219.69                                                       |
| 0.142822788                                    | 1                                               | 30.83333333                                                  |
| 0.026695529                                    | 1                                               | 182.0481928                                                  |
| 0.037848636                                    | 1.032608696                                     | 147.9809783                                                  |

| log.sigma.4.5.mm.3D_gldzm_LowIntensityLargeDistanceEmphasis | log.sigma.4.5.mm.3D_gldzm_HighIntensityEmphasis | log.sigma.4.5.mm.3D_gldzm_DistanceZoneVariability | log.sigma.4.5.mm.3D_gldzm_ZonePercentage |
|-------------------------------------------------------------|-------------------------------------------------|---------------------------------------------------|------------------------------------------|
| 0.02463029                                                  | 158.64                                          | 98.02                                             | 0.27700831                               |
| 0.044272063                                                 | 131.5103448                                     | 143.0137931                                       | 0.103349964                              |
| 0.035528418                                                 | 98.14925373                                     | 67                                                | 0.378531073                              |
| 0.01141487                                                  | 294.0737527                                     | 415.2255965                                       | 0.238489395                              |
| 0.091329627                                                 | 259.0526316                                     | 51.31578947                                       | 0.564356436                              |
| 0.133218172                                                 | 89.57142857                                     | 66.11428571                                       | 0.286885246                              |
| 0.076036317                                                 | 49                                              | 25                                                | 0.357142857                              |
| 0.073841808                                                 | 167.2625                                        | 154.1125                                          | 0.399002494                              |
| 0.014258121                                                 | 393.3893967                                     | 287.691042                                        | 0.370596206                              |
| 0.01425333                                                  | 193.2713755                                     | 257.267658                                        | 0.115998275                              |
| 0.06488567                                                  | 104.5785124                                     | 115.1157025                                       | 0.321808511                              |
| 0.032993676                                                 | 145.8                                           | 156.05                                            | 0.211360634                              |
| 0.10070905                                                  | 120.5041322                                     | 219.0247934                                       | 0.17715959                               |
| 0.020841893                                                 | 165.8024691                                     | 158.0493827                                       | 0.306818182                              |
| 0.046804502                                                 | 155.1136364                                     | 126.1363636                                       | 0.362637363                              |
| 0.011403528                                                 | 208.32                                          | 415.0894118                                       | 0.039250092                              |
| 0.090738246                                                 | 147.6728972                                     | 103.0747664                                       | 0.493087558                              |
| 0.028595892                                                 | 148.1283784                                     | 274.8175676                                       | 0.190721649                              |
| 0.046755465                                                 | 223.1717172                                     | 89.50505051                                       | 0.543956044                              |
| 0.03329036                                                  | 95.82291667                                     | 182.2604167                                       | 0.069214131                              |
| 0.021648309                                                 | 123.1528239                                     | 289.166113                                        | 0.059310345                              |
| 0.041615341                                                 | 153.1227273                                     | 202.7363636                                       | 0.242024202                              |
| 0.015197475                                                 | 168.3904382                                     | 251                                               | 0.085958904                              |
| 0.02833594                                                  | 196.1285714                                     | 70                                                | 0.526315789                              |
| 0.043187078                                                 | 84.92307692                                     | 117                                               | 0.121875                                 |
| 0.03171359                                                  | 111.7727273                                     | 84.09090909                                       | 0.291390728                              |
| 0.020079891                                                 | 140.5352113                                     | 209.0375587                                       | 0.093053735                              |
| 0.029845468                                                 | 114.4541667                                     | 240                                               | 0.061617458                              |
| 0.0123015                                                   | 211.0651685                                     | 429.2561798                                       | 0.119752422                              |
| 0.024336678                                                 | 135.6961326                                     | 171.2762431                                       | 0.106910809                              |
| 0.021178728                                                 | 144.9578544                                     | 251.1455939                                       | 0.062128065                              |
| 0.012579779                                                 | 179.1890244                                     | 636.304878                                        | 0.074266953                              |
| 0.03455477                                                  | 171.5105634                                     | 260.8732394                                       | 0.204463643                              |
| 0.12914277                                                  | 73.33333333                                     | 12                                                | 0.8                                      |
| 0.046708919                                                 | 181.0178571                                     | 54.03571429                                       | 0.495575221                              |
| 0.028096109                                                 | 158.7797203                                     | 248.2447552                                       | 0.214392804                              |
| 0.021910305                                                 | 133.1378378                                     | 352.3945946                                       | 0.055298162                              |
| 0.02122435                                                  | 148.3298969                                     | 283.1099656                                       | 0.095976253                              |
| 0.04634274                                                  | 225.6666667                                     | 108.6                                             | 0.373831776                              |
| 0.062711681                                                 | 104.5367647                                     | 128.2352941                                       | 0.253258845                              |
| 0.018373808                                                 | 187.3609023                                     | 133                                               | 0.186013986                              |
| 0.041932698                                                 | 191.5165563                                     | 141.3311258                                       | 0.396325459                              |
| 0.037979064                                                 | 141.7467249                                     | 215.3755459                                       | 0.277912621                              |
| 0.046441555                                                 | 164.3536585                                     | 162.0121951                                       | 0.37357631                               |
| 0.044920338                                                 | 144.1227437                                     | 224.8700361                                       | 0.248430493                              |
| 0.03586076                                                  | 67.75510204                                     | 145.0136054                                       | 0.024011761                              |
| 0.01686697                                                  | 235.4251497                                     | 440.2724551                                       | 0.243262928                              |
| 0.06767219                                                  | 116.2439024                                     | 78.09756098                                       | 0.359649123                              |
| 0.10241516                                                  | 72.92307692                                     | 13                                                | 0.590909091                              |
| 0.06886664                                                  | 308.6363636                                     | 80.36363636                                       | 0.602739726                              |
| 0.02436192                                                  | 133.0628931                                     | 306.1949686                                       | 0.077941176                              |
| 0.030352371                                                 | 94.07826087                                     | 109.1217391                                       | 0.285359801                              |
| 0.026004986                                                 | 160.367713                                      | 394.6816143                                       | 0.139593114                              |
| 0.03628812                                                  | 119.4067797                                     | 57.03389831                                       | 0.246861925                              |
| 0.017658985                                                 | 128.975                                         | 496.4730769                                       | 0.045993278                              |
| 0.046982458                                                 | 186.5555556                                     | 134.3472222                                       | 0.429850746                              |
| 0.012165259                                                 | 200.7630058                                     | 342.0231214                                       | 0.396788991                              |
| 0.042293064                                                 | 318.375                                         | 199.5089286                                       | 0.489082969                              |
| 0.039715412                                                 | 131.5576923                                     | 100.0769231                                       | 0.293785311                              |
| 0.028398679                                                 | 117.3666667                                     | 90                                                | 0.193133047                              |
| 0.033609742                                                 | 114.8467742                                     | 219.7016129                                       | 0.170446735                              |
| 0.014508885                                                 | 279.9581882                                     | 784.3101045                                       | 0.127066116                              |
| 0.032438028                                                 | 89.93220339                                     | 295                                               | 0.072410407                              |
| 0.039527217                                                 | 74.98113208                                     | 153.1132075                                       | 0.089225589                              |
| 0.149540465                                                 | 96.3125                                         | 30.0625                                           | 0.603773585                              |
| 0.031535595                                                 | 163.1636364                                     | 255.6618182                                       | 0.238715278                              |
| 0.077248494                                                 | 194.8                                           | 58.03333333                                       | 0.571428571                              |
| 0.036613942                                                 | 149.5047619                                     | 353.5619048                                       | 0.121142198                              |
| 0.080642887                                                 | 115.3076923                                     | 63.03076923                                       | 0.454545455                              |
| 0.036595906                                                 | 119.2200772                                     | 247.2162162                                       | 0.14453125                               |
| 0.024780547                                                 | 144.3035714                                     | 378.25                                            | 0.150827241                              |
| 0.042852865                                                 | 146.7714286                                     | 136.0571429                                       | 0.24691358                               |
| 0.023319849                                                 | 161.4601542                                     | 371.4164524                                       | 0.055122573                              |
| 0.061399419                                                 | 73.09411765                                     | 419.0423529                                       | 0.039228355                              |
| 0.023786287                                                 | 177.078453                                      | 828.0740331                                       | 0.062332117                              |
| 0.02062024                                                  | 199.9418605                                     | 168.0465116                                       | 0.385650224                              |
| 0.03272921                                                  | 106.662069                                      | 139.1241379                                       | 0.317982456                              |
| 0.046442449                                                 | 95.7654321                                      | 81                                                | 0.361607143                              |
| 0.025118345                                                 | 132.37                                          | 188.31                                            | 0.21905805                               |
| 0.011740217                                                 | 218.5621118                                     | 308.2670807                                       | 0.11908284                               |
| 0.072689222                                                 | 177.7647059                                     | 81.09411765                                       | 0.570469799                              |
| 0.017887687                                                 | 203.7837838                                     | 253.0694981                                       | 0.299421965                              |
| 0.01443397                                                  | 238.9016698                                     | 476.9220779                                       | 0.10935281                               |
| 0.090900949                                                 | 69.83333333                                     | 18                                                | 0.580645161                              |
| 0.018781103                                                 | 134.3420366                                     | 371.1253264                                       | 0.077186618                              |
| 0.034205599                                                 | 108.2119205                                     | 443.1103753                                       | 0.129170231                              |
| 0.06621843                                                  | 112.226087                                      | 111.0695652                                       | 0.315068493                              |
| 0.025870765                                                 | 342.8636364                                     | 244.7575758                                       | 0.448217317                              |
| 0.076522246                                                 | 56.52380952                                     | 21                                                | 0.42                                     |
| 0.447942946                                                 | 42.25                                           | 8.666666667                                       | 0.923076923                              |
| 0.017144524                                                 | 257.5448852                                     | 451.7181628                                       | 0.139690872                              |
| 0.058542602                                                 | 103.12                                          | 94.18                                             | 0.328947368                              |
| 0.095429506                                                 | 72.2875                                         | 76.1                                              | 0.192307692                              |
| 0.021431693                                                 | 133.0482315                                     | 303.1028939                                       | 0.085158817                              |
| 0.032523513                                                 | 128.3890339                                     | 367.2558747                                       | 0.053032401                              |
| 0.033546439                                                 | 250.025641                                      | 39                                                | 0.619047619                              |
| 0.03953414                                                  | 220.215                                         | 184.64                                            | 0.294117647                              |
| 0.142822788                                                 | 30.83333333                                     | 12                                                | 0.5                                      |
| 0.026695529                                                 | 182.0481928                                     | 83                                                | 0.509202454                              |
| 0.041471824                                                 | 148.0543478                                     | 90.02173913                                       | 0.328571429                              |

|                                                          |                                                             |                                                |
|----------------------------------------------------------|-------------------------------------------------------------|------------------------------------------------|
| log.sigma.4.5.mm.3D_gldzm_IntensityVariabilityNormalized | log.sigma.4.5.mm.3D_gldzm_LowIntensitySmallDistanceEmphasis | log.sigma.4.5.mm.3D_gldzm_IntensityVariability |
| 0.0696                                                   | 0.024320373                                                 | 6.96                                           |
| 0.080998811                                              | 0.018409994                                                 | 11.74482759                                    |
| 0.086656271                                              | 0.035528418                                                 | 5.805970149                                    |
| 0.055999172                                              | 0.007242275                                                 | 25.81561822                                    |
| 0.044629117                                              | 0.016887569                                                 | 2.543859649                                    |
| 0.103673469                                              | 0.026075315                                                 | 7.257142857                                    |
| 0.1232                                                   | 0.076036317                                                 | 3.08                                           |
| 0.060078125                                              | 0.024362641                                                 | 9.6125                                         |
| 0.037395266                                              | 0.008101693                                                 | 20.45521024                                    |
| 0.0703003                                                | 0.013786925                                                 | 18.91078067                                    |
| 0.08476197                                               | 0.030613657                                                 | 10.25619835                                    |
| 0.06546875                                               | 0.028924666                                                 | 10.475                                         |
| 0.072740933                                              | 0.030437221                                                 | 17.60330579                                    |
| 0.073159579                                              | 0.017343951                                                 | 11.85185185                                    |
| 0.068755739                                              | 0.014954755                                                 | 9.075757576                                    |
| 0.081876817                                              | 0.010386864                                                 | 34.79764706                                    |
| 0.067342126                                              | 0.020644788                                                 | 7.205607477                                    |
| 0.078661432                                              | 0.013124184                                                 | 23.28378378                                    |
| 0.048260382                                              | 0.021500309                                                 | 4.777777778                                    |
| 0.094943576                                              | 0.02505515                                                  | 18.22916667                                    |
| 0.083873246                                              | 0.020395478                                                 | 25.24584718                                    |
| 0.066900826                                              | 0.016015189                                                 | 14.71818182                                    |
| 0.076808305                                              | 0.015197475                                                 | 19.27888446                                    |
| 0.055918367                                              | 0.02833594                                                  | 3.914285714                                    |
| 0.08788078                                               | 0.043187078                                                 | 10.28205128                                    |
| 0.080061983                                              | 0.03031783                                                  | 7.045454545                                    |
| 0.079724041                                              | 0.018275314                                                 | 16.98122066                                    |
| 0.0884375                                                | 0.029845468                                                 | 21.225                                         |
| 0.06553213                                               | 0.011260601                                                 | 29.16179775                                    |
| 0.067305638                                              | 0.021679597                                                 | 12.18232044                                    |
| 0.073853878                                              | 0.018775939                                                 | 19.27586207                                    |
| 0.078166828                                              | 0.011689558                                                 | 51.27743902                                    |
| 0.060801428                                              | 0.015351157                                                 | 17.26760563                                    |
| 0.083333333                                              | 0.12914277                                                  | 1                                              |
| 0.059311224                                              | 0.029967848                                                 | 3.321428571                                    |
| 0.073744437                                              | 0.020154702                                                 | 21.09090909                                    |
| 0.078831264                                              | 0.01784261                                                  | 29.16756757                                    |
| 0.07372374                                               | 0.016844806                                                 | 21.45360825                                    |
| 0.060416667                                              | 0.012799202                                                 | 7.25                                           |
| 0.077638408                                              | 0.032838443                                                 | 10.55882353                                    |
| 0.068912884                                              | 0.018373808                                                 | 9.165413534                                    |
| 0.062234113                                              | 0.010799972                                                 | 9.397350993                                    |
| 0.075875746                                              | 0.015561582                                                 | 17.37554585                                    |
| 0.06097561                                               | 0.023575701                                                 | 10                                             |
| 0.071563555                                              | 0.019671458                                                 | 19.82310469                                    |
| 0.111481327                                              | 0.035462163                                                 | 16.3877551                                     |
| 0.056778658                                              | 0.009749372                                                 | 37.92814371                                    |
| 0.085663296                                              | 0.019082251                                                 | 7.024390244                                    |
| 0.088757396                                              | 0.10241516                                                  | 1.153846154                                    |
| 0.048811983                                              | 0.010338651                                                 | 4.295454545                                    |
| 0.07390926                                               | 0.021636612                                                 | 23.50314465                                    |
| 0.098979206                                              | 0.028667337                                                 | 11.3826087                                     |
| 0.068833075                                              | 0.017361987                                                 | 30.69955157                                    |
| 0.077851192                                              | 0.035503437                                                 | 4.593220339                                    |
| 0.089852071                                              | 0.01571814                                                  | 46.72307692                                    |
| 0.062789352                                              | 0.011229641                                                 | 9.041666667                                    |
| 0.068746032                                              | 0.011423744                                                 | 23.78612717                                    |
| 0.049864477                                              | 0.007293733                                                 | 11.16964286                                    |
| 0.068971893                                              | 0.038534384                                                 | 7.173076923                                    |
| 0.077530864                                              | 0.028398679                                                 | 6.977777778                                    |
| 0.087669095                                              | 0.030950197                                                 | 21.74193548                                    |
| 0.054077788                                              | 0.006340642                                                 | 46.56097561                                    |
| 0.091893134                                              | 0.032438028                                                 | 27.10847458                                    |
| 0.100114711                                              | 0.038956934                                                 | 15.91823899                                    |
| 0.091796875                                              | 0.032352965                                                 | 2.9375                                         |
| 0.067557025                                              | 0.01325874                                                  | 18.57818182                                    |
| 0.06                                                     | 0.014748494                                                 | 3.6                                            |
| 0.066655329                                              | 0.017437918                                                 | 27.9952381                                     |
| 0.079289941                                              | 0.022950579                                                 | 5.153846154                                    |
| 0.080782934                                              | 0.019687413                                                 | 20.92277992                                    |
| 0.0740707                                                | 0.01937248                                                  | 29.03571429                                    |
| 0.07877551                                               | 0.015881139                                                 | 11.02857143                                    |
| 0.088956589                                              | 0.009880318                                                 | 34.60411311                                    |
| 0.09506436                                               | 0.05197785                                                  | 40.40235294                                    |
| 0.070226184                                              | 0.012477942                                                 | 63.55469613                                    |
| 0.06726609                                               | 0.017325667                                                 | 11.56976744                                    |
| 0.083186683                                              | 0.026263693                                                 | 12.06206897                                    |
| 0.079408627                                              | 0.046442449                                                 | 6.432098765                                    |
| 0.07145                                                  | 0.021395224                                                 | 14.29                                          |
| 0.070676286                                              | 0.010820081                                                 | 22.75776398                                    |
| 0.062422145                                              | 0.017542163                                                 | 5.305882353                                    |
| 0.060598381                                              | 0.015554997                                                 | 15.69498069                                    |
| 0.061031733                                              | 0.007936572                                                 | 32.8961039                                     |
| 0.086419753                                              | 0.090900949                                                 | 1.555555556                                    |
| 0.082903285                                              | 0.017069889                                                 | 31.75195822                                    |
| 0.087213524                                              | 0.022504798                                                 | 39.50772627                                    |
| 0.076899811                                              | 0.032944251                                                 | 8.843478261                                    |
| 0.057105142                                              | 0.006470113                                                 | 15.07575758                                    |
| 0.111111111                                              | 0.076522246                                                 | 2.333333333                                    |
| 0.111111111                                              | 0.057317946                                                 | 1.333333333                                    |
| 0.063445505                                              | 0.00734903                                                  | 30.39039666                                    |
| 0.0684                                                   | 0.055814333                                                 | 6.84                                           |
| 0.085625                                                 | 0.046679506                                                 | 6.85                                           |
| 0.075505836                                              | 0.019711957                                                 | 23.48231511                                    |
| 0.075240816                                              | 0.018355735                                                 | 28.81723238                                    |
| 0.067718606                                              | 0.033546439                                                 | 2.641025641                                    |
| 0.05935                                                  | 0.008682737                                                 | 11.87                                          |
| 0.138888889                                              | 0.142822788                                                 | 1.666666667                                    |
| 0.054434606                                              | 0.026695529                                                 | 4.518072289                                    |
| 0.063563327                                              | 0.036942839                                                 | 5.847826087                                    |

| log.sigma.4.5.mm.3D_gldzm_HighIntensityLargeDistanceEmphasis | log.sigma.4.5.mm.3D_gldzm_SmallDistanceEmphasis | log.sigma.4.5.mm.3D_gldzm_SumVariance | log.sigma.4.5.mm.3D_gldzm_Homogeneity1 |
|--------------------------------------------------------------|-------------------------------------------------|---------------------------------------|----------------------------------------|
| 162.27                                                       | 0.9925                                          | 315.0783758                           | 0.40159292                             |
| 131.5310345                                                  | 0.994827586                                     | 290.1213467                           | 0.522046828                            |
| 98.14925373                                                  | 1                                               | 119.6214952                           | 0.39176594                             |
| 313.4164859                                                  | 0.960050615                                     | 584.739144                            | 0.421267742                            |
| 262.1578947                                                  | 0.960526316                                     | 497.8928715                           | 0.271429897                            |
| 89.65714286                                                  | 0.978571429                                     | 83.55032843                           | 0.409676412                            |
| 49                                                           | 1                                               | 38.59154362                           | 0.447653634                            |
| 167.46875                                                    | 0.9859375                                       | 191.5086259                           | 0.350770802                            |
| 1332.345521                                                  | 0.742915905                                     | 1318.521426                           | 0.303246035                            |
| 210.2565056                                                  | 0.983271375                                     | 384.8240988                           | 0.523847038                            |
| 107.6033058                                                  | 0.980257117                                     | 96.81302151                           | 0.399676727                            |
| 146.26875                                                    | 0.990625                                        | 245.9672645                           | 0.442364045                            |
| 130.3264463                                                  | 0.961662075                                     | 99.79769011                           | 0.460986994                            |
| 166.4320988                                                  | 0.990740741                                     | 215.9688348                           | 0.397358768                            |
| 157.6136364                                                  | 0.982954545                                     | 202.8474863                           | 0.370520932                            |
| 214.16                                                       | 0.990522876                                     | 590.3149371                           | 0.754402453                            |
| 147.728972                                                   | 0.985981308                                     | 200.5851989                           | 0.319980828                            |
| 155.7601351                                                  | 0.972128378                                     | 186.4794655                           | 0.461578021                            |
| 226.3838384                                                  | 0.962121212                                     | 338.479534                            | 0.282403814                            |
| 98.61979167                                                  | 0.98046875                                      | 213.4952218                           | 0.571696487                            |
| 150                                                          | 0.983342562                                     | 316.9058035                           | 0.63353867                             |
| 159.6136364                                                  | 0.969318182                                     | 208.7432716                           | 0.434242652                            |
| 168.3904382                                                  | 1                                               | 440.2312838                           | 0.594394556                            |
| 196.1285714                                                  | 1                                               | 548.7667345                           | 0.317878648                            |
| 84.92307692                                                  | 1                                               | 144.9976309                           | 0.557609389                            |
| 116.2045455                                                  | 0.982954545                                     | 165.7554992                           | 0.399432914                            |
| 141.1126761                                                  | 0.992957746                                     | 276.8675323                           | 0.586254623                            |
| 114.4541667                                                  | 1                                               | 341.9839098                           | 0.665200106                            |
| 219.5258427                                                  | 0.986204744                                     | 592.1692199                           | 0.576165328                            |
| 140.6187845                                                  | 0.979281768                                     | 402.5881975                           | 0.539291475                            |
| 161.7164751                                                  | 0.98403576                                      | 317.5885405                           | 0.615683138                            |
| 183.9131098                                                  | 0.988567073                                     | 378.6461699                           | 0.653895619                            |
| 184.0528169                                                  | 0.967331768                                     | 287.7721061                           | 0.424830559                            |
| 73.33333333                                                  | 1                                               | 184.9233046                           | 0.287557775                            |
| 181.2321429                                                  | 0.986607143                                     | 317.8462938                           | 0.310061708                            |
| 200.9615385                                                  | 0.944954351                                     | 222.7268989                           | 0.416678371                            |
| 139.1351351                                                  | 0.981381381                                     | 394.6138805                           | 0.664225394                            |
| 150.5257732                                                  | 0.989690722                                     | 255.180804                            | 0.54263232                             |
| 237.6666667                                                  | 0.9625                                          | 398.614752                            | 0.345286162                            |
| 107.3161765                                                  | 0.977941176                                     | 179.7709953                           | 0.410629561                            |
| 187.3609023                                                  | 1                                               | 439.8935314                           | 0.474912293                            |
| 193.0264901                                                  | 0.975165563                                     | 245.7569301                           | 0.382948791                            |
| 148.0349345                                                  | 0.976467734                                     | 185.0803187                           | 0.406323873                            |
| 164.3719512                                                  | 0.995426829                                     | 200.7940659                           | 0.370904397                            |
| 188.33213                                                    | 0.92097874                                      | 237.0929985                           | 0.406523897                            |
| 69.06122449                                                  | 0.994897959                                     | 240.1211108                           | 0.740816451                            |
| 834.3473054                                                  | 0.835329341                                     | 426.2342647                           | 0.393418119                            |
| 116.8658537                                                  | 0.981707317                                     | 106.5953781                           | 0.381350205                            |
| 72.92307692                                                  | 1                                               | 122.1672661                           | 0.28810391                             |
| 311.875                                                      | 0.965909091                                     | 634.3571099                           | 0.247327605                            |
| 139.7578616                                                  | 0.985412299                                     | 325.1414081                           | 0.611696445                            |
| 104.8173913                                                  | 0.979227053                                     | 81.67416315                           | 0.421299397                            |
| 196.4663677                                                  | 0.952618959                                     | 363.1809873                           | 0.482538975                            |
| 123.5254237                                                  | 0.987288136                                     | 176.1369208                           | 0.402221141                            |
| 145.3192308                                                  | 0.981927885                                     | 367.6504773                           | 0.702552159                            |
| 188.5347222                                                  | 0.973958333                                     | 300.4329047                           | 0.324642089                            |
| 202.367052                                                   | 0.99566474                                      | 335.799037                            | 0.357216195                            |
| 326.6383929                                                  | 0.956473214                                     | 633.8071252                           | 0.29066272                             |
| 135.3076923                                                  | 0.985576923                                     | 185.7745819                           | 0.405657021                            |
| 117.3666667                                                  | 1                                               | 180.0389043                           | 0.452675302                            |
| 140.0927419                                                  | 0.954077061                                     | 168.0218312                           | 0.45509966                             |
| 301.0998839                                                  | 0.964350239                                     | 645.2999932                           | 0.549239378                            |
| 89.93220339                                                  | 1                                               | 174.3298284                           | 0.608688524                            |
| 82.88679245                                                  | 0.985849057                                     | 156.8712496                           | 0.564909401                            |
| 96.40625                                                     | 0.9765625                                       | 163.4429058                           | 0.313938248                            |
| 168.7709091                                                  | 0.972222222                                     | 304.1458029                           | 0.424654431                            |
| 194.85                                                       | 0.9875                                          | 313.5902168                           | 0.283397539                            |
| 174.3547619                                                  | 0.934391534                                     | 328.7736249                           | 0.510374858                            |
| 115.3538462                                                  | 0.988461538                                     | 133.9835352                           | 0.334185282                            |
| 126.2355212                                                  | 0.981552982                                     | 240.1302516                           | 0.501279082                            |
| 147.7168367                                                  | 0.986607143                                     | 288.7190462                           | 0.490972799                            |
| 149.8785714                                                  | 0.989285714                                     | 180.4002348                           | 0.416150115                            |
| 164.5835476                                                  | 0.982647815                                     | 445.435275                            | 0.633612555                            |
| 73.53176471                                                  | 0.994705882                                     | 203.4025528                           | 0.685095085                            |
| 195.3867403                                                  | 0.965876304                                     | 389.8086458                           | 0.687265279                            |
| 200.5348837                                                  | 0.99127907                                      | 313.7653674                           | 0.343833674                            |
| 107.7793103                                                  | 0.984482759                                     | 124.6466519                           | 0.411509778                            |
| 95.7654321                                                   | 1                                               | 81.7040858                            | 0.392623598                            |
| 144.305                                                      | 0.976805556                                     | 220.7655137                           | 0.441072132                            |
| 231.6118012                                                  | 0.98326432                                      | 560.1401522                           | 0.557860403                            |
| 177.9411765                                                  | 0.982352941                                     | 298.0500847                           | 0.302182264                            |
| 205.3359073                                                  | 0.991312741                                     | 370.6097438                           | 0.404933026                            |
| 254.3840445                                                  | 0.953823954                                     | 628.4355095                           | 0.562455572                            |
| 69.83333333                                                  | 1                                               | 134.7545663                           | 0.341470342                            |
| 155.8720627                                                  | 0.98685016                                      | 281.2018023                           | 0.601862134                            |
| 109.0066225                                                  | 0.991721854                                     | 142.007953                            | 0.513861717                            |
| 113.5304348                                                  | 0.986956522                                     | 120.4791996                           | 0.406056165                            |
| 351.4659091                                                  | 0.971590909                                     | 692.6609663                           | 0.308201419                            |
| 56.52380952                                                  | 1                                               | 98.16059556                           | 0.423415174                            |
| 43.5                                                         | 0.875                                           | 66.6345695                            | 0.314295163                            |
| 274.782881                                                   | 0.97749942                                      | 696.5757794                           | 0.536909991                            |
| 107.77                                                       | 0.9775                                          | 107.9628568                           | 0.391888916                            |
| 73.2625                                                      | 0.98125                                         | 93.09818528                           | 0.459158611                            |
| 134.5723473                                                  | 0.990353698                                     | 349.1795769                           | 0.554498183                            |
| 137.4151436                                                  | 0.983246301                                     | 303.5356209                           | 0.641381353                            |
| 250.025641                                                   | 1                                               | 577.6979384                           | 0.266684056                            |
| 222.315                                                      | 0.97                                            | 330.0678649                           | 0.366487486                            |
| 30.83333333                                                  | 1                                               | 38.20612103                           | 0.395399559                            |
| 182.0481928                                                  | 1                                               | 379.1213236                           | 0.340449037                            |
| 148.3478261                                                  | 0.991847826                                     | 341.8149956                           | 0.432568536                            |

| log.sigma.4.5.mm.3D_glc_m_Homogeneity2 | log.sigma.4.5.mm.3D_glc_m_ClusterShade | log.sigma.4.5.mm.3D_glc_m_MaximumProbability | log.sigma.4.5.mm.3D_glc_m_Idmn | log.sigma.4.5.mm.3D_glc_m_SumVariance2 |
|----------------------------------------|----------------------------------------|----------------------------------------------|--------------------------------|----------------------------------------|
| 0.318533895                            | 12.37062177                            | 0.025431328                                  | 0.978146152                    | 64.85742575                            |
| 0.464693529                            | -83.22193831                           | 0.061627438                                  | 0.985061101                    | 34.7935643                             |
| 0.301679291                            | 65.19120641                            | 0.038665172                                  | 0.963467206                    | 31.04414524                            |
| 0.344194063                            | 26.16519053                            | 0.022190505                                  | 0.986710315                    | 53.4603614                             |
| 0.173515417                            | 631.0793257                            | 0.023297415                                  | 0.960409005                    | 123.661973                             |
| 0.327429547                            | 49.45344805                            | 0.036222876                                  | 0.959649579                    | 25.1948                                |
| 0.374037343                            | 45.54336253                            | 0.074158999                                  | 0.95342016                     | 12.84822845                            |
| 0.261927002                            | 361.3366042                            | 0.021854765                                  | 0.975457294                    | 58.56199742                            |
| 0.213485047                            | 2387.407861                            | 0.009770374                                  | 0.977285407                    | 301.5064361                            |
| 0.467904789                            | -29.71501943                           | 0.048711876                                  | 0.991839276                    | 29.61424241                            |
| 0.317104253                            | 87.73775898                            | 0.039291795                                  | 0.967080041                    | 27.38512121                            |
| 0.366874784                            | 18.00829917                            | 0.024036186                                  | 0.985297296                    | 41.91853581                            |
| 0.391620925                            | 159.8393857                            | 0.0421661                                    | 0.983364535                    | 28.69910853                            |
| 0.315359502                            | 206.5754554                            | 0.026472906                                  | 0.977478359                    | 48.31002192                            |
| 0.282068863                            | 109.8551029                            | 0.021846103                                  | 0.97141881                     | 46.20222358                            |
| 0.738270767                            | -123.6650113                           | 0.273470358                                  | 0.99728462                     | 15.94409236                            |
| 0.223382623                            | 91.87733764                            | 0.023569034                                  | 0.957806303                    | 54.75911111                            |
| 0.391688045                            | 43.90979283                            | 0.031313298                                  | 0.987588447                    | 30.70460458                            |
| 0.186916814                            | 249.0022081                            | 0.02121259                                   | 0.953065861                    | 94.71368807                            |
| 0.52539082                             | -48.22884885                           | 0.075597278                                  | 0.989255715                    | 31.6563849                             |
| 0.598692003                            | -53.16668301                           | 0.164339218                                  | 0.994927364                    | 19.37671524                            |
| 0.358013321                            | 226.9243325                            | 0.031786211                                  | 0.979847579                    | 44.65565724                            |
| 0.554051003                            | -103.9436774                           | 0.100958521                                  | 0.993877014                    | 24.93701381                            |
| 0.220346497                            | -234.8841264                           | 0.027233414                                  | 0.968825034                    | 119.6552913                            |
| 0.510127554                            | -55.20034947                           | 0.054276537                                  | 0.987395796                    | 21.84649325                            |
| 0.314281592                            | 9.337741321                            | 0.026697449                                  | 0.970223139                    | 31.47446978                            |
| 0.543945428                            | -43.06003204                           | 0.092536611                                  | 0.993414305                    | 18.46956171                            |
| 0.632375921                            | -144.795369                            | 0.262700491                                  | 0.996709769                    | 27.95057529                            |
| 0.525837014                            | -194.4069552                           | 0.198589167                                  | 0.994032607                    | 41.25902874                            |
| 0.484583669                            | -135.6370895                           | 0.087673476                                  | 0.990433786                    | 44.26975825                            |
| 0.576523926                            | -77.33149604                           | 0.16593087                                   | 0.993682727                    | 24.38182269                            |
| 0.621076319                            | -88.96613252                           | 0.225268309                                  | 0.995796819                    | 20.94519807                            |
| 0.345701996                            | 44.96323201                            | 0.02191576                                   | 0.985063821                    | 49.50048176                            |
| 0.189072389                            | 57.35381508                            | 0.1375                                       | 0.915366433                    | 36.8552297                             |
| 0.211146535                            | 77.95634049                            | 0.029416927                                  | 0.962791484                    | 60.19048118                            |
| 0.336018402                            | 48.2758747                             | 0.026277106                                  | 0.978340584                    | 32.69128004                            |
| 0.632095437                            | -153.6173158                           | 0.193233811                                  | 0.994737406                    | 26.42282065                            |
| 0.48943612                             | -31.74902122                           | 0.072306324                                  | 0.991330232                    | 35.51375877                            |
| 0.254187692                            | 111.5286826                            | 0.019746401                                  | 0.973785021                    | 88.47679828                            |
| 0.327468055                            | 119.2825167                            | 0.026230644                                  | 0.974751173                    | 50.30720632                            |
| 0.406009593                            | -100.0063951                           | 0.032055594                                  | 0.988854626                    | 44.46037219                            |
| 0.299762901                            | 381.528007                             | 0.03627672                                   | 0.977552049                    | 48.47024975                            |
| 0.324025726                            | 48.96046297                            | 0.029924917                                  | 0.976005947                    | 26.64000227                            |
| 0.28601718                             | 377.9684436                            | 0.028154557                                  | 0.978012208                    | 59.32140837                            |
| 0.323589903                            | 403.8537693                            | 0.031795741                                  | 0.9802586                      | 56.85402622                            |
| 0.723515761                            | -68.51733374                           | 0.238324799                                  | 0.994396912                    | 14.52722681                            |
| 0.310818893                            | 737.0086353                            | 0.016404839                                  | 0.990961718                    | 75.00048062                            |
| 0.297524984                            | 126.8352844                            | 0.036630177                                  | 0.960506362                    | 35.5102603                             |
| 0.17781399                             | 35.07021194                            | 0.096203796                                  | 0.909612344                    | 23.80285996                            |
| 0.151827006                            | 221.1943894                            | 0.020150007                                  | 0.956979473                    | 126.704823                             |
| 0.570537433                            | -93.26666357                           | 0.186202342                                  | 0.992875049                    | 27.43162973                            |
| 0.342184139                            | 58.2770496                             | 0.056173102                                  | 0.966908471                    | 18.74163779                            |
| 0.415838943                            | -74.1362001                            | 0.057106465                                  | 0.989798248                    | 39.6558781                             |
| 0.315824976                            | 13.64481895                            | 0.025867518                                  | 0.970318243                    | 43.01159243                            |
| 0.676971503                            | -120.2214298                           | 0.261747329                                  | 0.994937097                    | 20.60527532                            |
| 0.230397132                            | 91.28157492                            | 0.018217633                                  | 0.963616207                    | 57.00713213                            |
| 0.266923058                            | 105.1448221                            | 0.017831635                                  | 0.980075622                    | 42.01793209                            |
| 0.19551263                             | -299.4802785                           | 0.012590107                                  | 0.965951005                    | 109.5871866                            |
| 0.320242883                            | 110.7321143                            | 0.024864993                                  | 0.978403227                    | 45.53308597                            |
| 0.377395404                            | 45.81505572                            | 0.031282486                                  | 0.981993252                    | 41.01815979                            |
| 0.382291152                            | 83.48617071                            | 0.033784143                                  | 0.982895512                    | 29.9850114                             |
| 0.497185886                            | -146.068338                            | 0.105990969                                  | 0.994133032                    | 46.13289228                            |
| 0.570924967                            | -58.58856655                           | 0.098226613                                  | 0.993281976                    | 20.91883813                            |
| 0.51566784                             | -19.45080079                           | 0.083596057                                  | 0.983155125                    | 21.93429575                            |
| 0.212750556                            | 13.33269581                            | 0.04767693                                   | 0.94552213                     | 31.96786098                            |
| 0.347000286                            | -64.20814504                           | 0.024135853                                  | 0.984578894                    | 43.0730535                             |
| 0.185523333                            | 8.989780327                            | 0.028437726                                  | 0.946696623                    | 58.65468413                            |
| 0.450113268                            | -93.72236787                           | 0.076773728                                  | 0.988929267                    | 53.77171535                            |
| 0.240043767                            | 105.5476126                            | 0.029483109                                  | 0.94992724                     | 40.85061775                            |
| 0.439443617                            | -29.99484533                           | 0.035126623                                  | 0.98533823                     | 33.5168073                             |
| 0.427926944                            | -45.31094772                           | 0.039332956                                  | 0.98564375                     | 34.64030503                            |
| 0.336392789                            | 113.5545282                            | 0.028239614                                  | 0.979128047                    | 32.85604973                            |
| 0.596968473                            | -114.5667299                           | 0.147804429                                  | 0.994531932                    | 27.88606688                            |
| 0.657402511                            | -97.23047866                           | 0.207993358                                  | 0.99277125                     | 22.52736478                            |
| 0.659225396                            | -108.7267948                           | 0.24875721                                   | 0.995758528                    | 21.82707381                            |
| 0.254049156                            | 116.0909977                            | 0.022864253                                  | 0.970004279                    | 52.4158353                             |
| 0.330916247                            | 75.19552009                            | 0.04512017                                   | 0.974898699                    | 25.23875296                            |
| 0.310698934                            | 159.6978618                            | 0.047771096                                  | 0.967248657                    | 32.2890117                             |
| 0.366746826                            | 9.527198882                            | 0.028352658                                  | 0.97791399                     | 24.86741156                            |
| 0.505586728                            | -72.53403921                           | 0.127540268                                  | 0.992601246                    | 29.42204382                            |
| 0.206986696                            | 93.69303694                            | 0.028596474                                  | 0.950590847                    | 50.9843168                             |
| 0.323761075                            | 72.04050596                            | 0.023017631                                  | 0.983171443                    | 49.06227955                            |
| 0.512953566                            | -157.6043186                           | 0.112898107                                  | 0.993685311                    | 34.99596862                            |
| 0.246800943                            | 9.482293399                            | 0.0770051                                    | 0.922920929                    | 23.04477169                            |
| 0.561127493                            | -63.31782381                           | 0.135379225                                  | 0.991096188                    | 21.59191765                            |
| 0.456318412                            | 27.05768397                            | 0.042601149                                  | 0.985571841                    | 20.53421039                            |
| 0.324085368                            | 173.8389838                            | 0.029765284                                  | 0.977089471                    | 35.03240524                            |
| 0.214435505                            | 32.87802698                            | 0.022480003                                  | 0.975419324                    | 69.05866174                            |
| 0.346317732                            | 8.577896455                            | 0.076835836                                  | 0.941794874                    | 9.523734443                            |
| 0.218291452                            | 53.83005595                            | 0.081349206                                  | 0.898610435                    | 18.3568909                             |
| 0.480642215                            | -203.4238755                           | 0.089837703                                  | 0.993241064                    | 49.74840114                            |
| 0.306796107                            | 374.9251654                            | 0.032080005                                  | 0.972119534                    | 48.98305453                            |
| 0.387656373                            | 25.960291                              | 0.032626868                                  | 0.972147119                    | 24.76548605                            |
| 0.504731467                            | -54.38793955                           | 0.065864116                                  | 0.990356429                    | 35.31014148                            |
| 0.605337256                            | -92.65455428                           | 0.199681825                                  | 0.993385844                    | 26.89443437                            |
| 0.169308484                            | 4.450968285                            | 0.0343985                                    | 0.957869431                    | 59.2016987                             |
| 0.278319175                            | 97.6464963                             | 0.015423856                                  | 0.976687194                    | 63.25878254                            |
| 0.310148942                            | 26.73406431                            | 0.117316764                                  | 0.900020156                    | 11.91188756                            |
| 0.246388007                            | 373.9447199                            | 0.029695204                                  | 0.970984487                    | 87.85573362                            |
| 0.35569541                             | -95.52207859                           | 0.038570333                                  | 0.982005996                    | 45.59112664                            |

| log.sigma.4.5.mm.3D_glc_m_Contrast | log.sigma.4.5.mm.3D_glc_m_DifferenceEntropy | log.sigma.4.5.mm.3D_glc_m_InverseVariance | log.sigma.4.5.mm.3D_glc_m_Entropy | log.sigma.4.5.mm.3D_glc_m_Dissimilarity |
|------------------------------------|---------------------------------------------|-------------------------------------------|-----------------------------------|-----------------------------------------|
| 10.37120219                        | 2.756784465                                 | 0.341185795                               | 7.172299545                       | 2.502588179                             |
| 5.176174727                        | 2.374726647                                 | 0.407074192                               | 6.421508176                       | 1.635042896                             |
| 10.31091545                        | 2.699395101                                 | 0.291809194                               | 6.276875226                       | 2.583377468                             |
| 11.79739327                        | 2.894760789                                 | 0.338096451                               | 7.464922068                       | 2.539131157                             |
| 34.66433556                        | 3.383819051                                 | 0.181524175                               | 6.566796202                       | 4.762681683                             |
| 10.22019675                        | 2.770639598                                 | 0.323399725                               | 6.393133566                       | 2.50159126                              |
| 8.04046575                         | 2.360421821                                 | 0.371962696                               | 4.955906959                       | 2.129960278                             |
| 19.4201095                         | 3.200694597                                 | 0.268855325                               | 7.349100119                       | 3.404184088                             |
| 37.4332259                         | 3.655686559                                 | 0.21852885                                | 9.002978669                       | 4.639261857                             |
| 4.471930119                        | 2.297974688                                 | 0.429574854                               | 6.442432374                       | 1.54959635                              |
| 11.79470402                        | 2.873499106                                 | 0.318119073                               | 6.651203631                       | 2.66182277                              |
| 8.262519981                        | 2.621892978                                 | 0.365385703                               | 6.94114633                        | 2.16336314                              |
| 7.910442277                        | 2.623900102                                 | 0.385845623                               | 6.567391623                       | 2.062325546                             |
| 12.82753851                        | 2.929901467                                 | 0.316631259                               | 7.123031298                       | 2.742314879                             |
| 15.16541031                        | 3.030632064                                 | 0.280062478                               | 7.149041933                       | 3.036562598                             |
| 1.624564709                        | 1.574495195                                 | 0.339581589                               | 4.350351502                       | 0.671318215                             |
| 20.80437211                        | 3.110571756                                 | 0.224942                                  | 6.976407392                       | 3.6941755                               |
| 8.201204859                        | 2.667715172                                 | 0.372637473                               | 6.805241494                       | 2.099170219                             |
| 33.14247143                        | 3.465377793                                 | 0.184092001                               | 7.191441214                       | 4.668262553                             |
| 3.25377736                         | 2.110091506                                 | 0.435267844                               | 6.059885227                       | 1.2936439                               |
| 2.298066951                        | 1.922878998                                 | 0.42309115                                | 5.382074763                       | 1.028800357                             |
| 10.56139291                        | 2.820333662                                 | 0.334450458                               | 6.997278459                       | 2.409871342                             |
| 3.064590629                        | 2.059429302                                 | 0.441931543                               | 5.801878237                       | 1.205659011                             |
| 21.19985718                        | 3.049980868                                 | 0.221281713                               | 6.58795452                        | 3.718205373                             |
| 3.436592422                        | 2.111402607                                 | 0.453570676                               | 5.871914497                       | 1.33422896                              |
| 10.63222932                        | 2.796731617                                 | 0.322362522                               | 6.752882136                       | 2.545532373                             |
| 3.312750385                        | 2.105337171                                 | 0.438214427                               | 5.739505897                       | 1.252746453                             |
| 2.466090462                        | 1.92135753                                  | 0.37123002                                | 5.169446404                       | 0.982476427                             |
| 5.565389727                        | 2.401984942                                 | 0.349010593                               | 6.070461421                       | 1.540723683                             |
| 4.396254143                        | 2.301956382                                 | 0.40860855                                | 6.401240189                       | 1.511836663                             |
| 2.890361346                        | 2.044950532                                 | 0.411907943                               | 5.647689231                       | 1.143498045                             |
| 3.177458255                        | 2.02907191                                  | 0.379586295                               | 5.348022537                       | 1.079204944                             |
| 9.879169948                        | 2.791532802                                 | 0.339229191                               | 7.274356853                       | 2.380505355                             |
| 23.70705128                        | 1.719269229                                 | 0.234363195                               | 3.214743508                       | 4.010897436                             |
| 21.86791443                        | 3.135012581                                 | 0.220229347                               | 6.471264154                       | 3.781306847                             |
| 10.32614488                        | 2.821456511                                 | 0.334241731                               | 7.052315468                       | 2.45014778                              |
| 2.646298155                        | 1.956726801                                 | 0.37309792                                | 5.165369063                       | 1.007079876                             |
| 4.358983291                        | 2.294953259                                 | 0.414561952                               | 6.402549565                       | 1.496653395                             |
| 19.29543089                        | 3.134760134                                 | 0.258904186                               | 7.446683674                       | 3.427452032                             |
| 9.917451194                        | 2.772277131                                 | 0.327944491                               | 7.031899468                       | 2.447264577                             |
| 6.740674213                        | 2.516494511                                 | 0.381983756                               | 6.743693898                       | 1.920840792                             |
| 16.48196544                        | 3.089150741                                 | 0.2939102                                 | 6.935664                          | 3.058159868                             |
| 11.45640199                        | 2.870952831                                 | 0.318667353                               | 6.89999131                        | 2.597203469                             |
| 17.3084599                         | 3.122571468                                 | 0.291816039                               | 7.235948149                       | 3.163757049                             |
| 11.14738218                        | 2.871827067                                 | 0.317104174                               | 7.321218444                       | 2.572939548                             |
| 1.135882072                        | 1.513540463                                 | 0.368489455                               | 4.235028425                       | 0.646132952                             |
| 15.11481142                        | 3.042341235                                 | 0.314777502                               | 7.707025741                       | 2.854115725                             |
| 14.45360308                        | 2.991189833                                 | 0.304920213                               | 6.669280011                       | 2.941501071                             |
| 22.63296148                        | 2.114175123                                 | 0.169457399                               | 3.830833895                       | 3.912887113                             |
| 46.12147565                        | 3.603426073                                 | 0.155243686                               | 7.056671624                       | 5.557949648                             |
| 3.273619339                        | 2.113203299                                 | 0.394890669                               | 5.707430463                       | 1.203136012                             |
| 10.6922318                         | 2.840395465                                 | 0.326283615                               | 6.357234537                       | 2.48567637                              |
| 6.646018156                        | 2.54184022                                  | 0.380665536                               | 6.794268015                       | 1.904528524                             |
| 10.48566739                        | 2.768977181                                 | 0.302330615                               | 6.756550801                       | 2.551813546                             |
| 2.110241682                        | 1.807402063                                 | 0.358382064                               | 4.81726679                        | 0.85608613                              |
| 21.39877569                        | 3.232115219                                 | 0.239481673                               | 7.443765415                       | 3.681992473                             |
| 16.63932946                        | 3.091560346                                 | 0.272267509                               | 7.384049826                       | 3.194288624                             |
| 31.44859391                        | 3.456525775                                 | 0.199123562                               | 7.953198886                       | 4.487674026                             |
| 10.23591603                        | 2.752893504                                 | 0.317436831                               | 6.921931273                       | 2.487591606                             |
| 6.172739808                        | 2.436523434                                 | 0.379017777                               | 6.656184801                       | 1.951014062                             |
| 7.308851857                        | 2.605977067                                 | 0.374154104                               | 6.675512428                       | 2.04740837                              |
| 6.633102391                        | 2.501883844                                 | 0.374127922                               | 6.589342307                       | 1.690643899                             |
| 2.788099846                        | 1.988608082                                 | 0.438876445                               | 5.643163929                       | 1.141339431                             |
| 3.544956994                        | 2.158055729                                 | 0.418922755                               | 5.861342342                       | 1.350009953                             |
| 17.95869853                        | 2.906724857                                 | 0.227243837                               | 5.386154811                       | 3.516253015                             |
| 10.23015731                        | 2.779258914                                 | 0.346071162                               | 7.141179267                       | 2.406669187                             |
| 29.31640895                        | 3.276242913                                 | 0.190370956                               | 6.358777365                       | 4.437399552                             |
| 6.726724381                        | 2.557116499                                 | 0.377445476                               | 6.78139976                        | 1.827212671                             |
| 18.45237096                        | 3.110048237                                 | 0.2446571                                 | 6.536680023                       | 3.469006919                             |
| 5.634844641                        | 2.431655538                                 | 0.403762952                               | 6.598598924                       | 1.73928783                              |
| 6.801457182                        | 2.527004779                                 | 0.397747883                               | 6.755917359                       | 1.866907157                             |
| 10.97003984                        | 2.843369752                                 | 0.337602258                               | 6.88769654                        | 2.489380983                             |
| 2.7338074                          | 2.014994054                                 | 0.397895105                               | 5.473440023                       | 1.087520389                             |
| 1.932518242                        | 1.813555697                                 | 0.381198255                               | 5.058577804                       | 0.874950887                             |
| 2.993497177                        | 1.945362241                                 | 0.35407548                                | 5.065027788                       | 0.980194192                             |
| 20.58198753                        | 3.20152199                                  | 0.259228535                               | 7.363515637                       | 3.52493082                              |
| 10.89363065                        | 2.825790052                                 | 0.327347265                               | 6.592654257                       | 2.53845916                              |
| 13.26413325                        | 2.919079408                                 | 0.324403739                               | 6.329666973                       | 2.775423302                             |
| 8.630997142                        | 2.694316118                                 | 0.363815574                               | 6.693943658                       | 2.219634958                             |
| 4.812673165                        | 2.345004409                                 | 0.384769106                               | 6.122377937                       | 1.504840827                             |
| 27.40969826                        | 3.276366377                                 | 0.211570974                               | 6.689570631                       | 4.188714374                             |
| 12.11604763                        | 2.919364615                                 | 0.328656152                               | 7.363717527                       | 2.629268184                             |
| 5.528720642                        | 2.382377656                                 | 0.386632697                               | 6.243143634                       | 1.550692245                             |
| 16.13208778                        | 2.491956962                                 | 0.265474336                               | 4.526319482                       | 3.233437289                             |
| 3.395617086                        | 2.120006847                                 | 0.417069462                               | 5.719515571                       | 1.228396306                             |
| 5.561624243                        | 2.416728951                                 | 0.41445064                                | 6.32914179                        | 1.691105247                             |
| 10.96368914                        | 2.837083311                                 | 0.332821493                               | 6.742440174                       | 2.539709366                             |
| 26.94215936                        | 3.42677383                                  | 0.214074208                               | 7.773081331                       | 4.141749624                             |
| 8.371249885                        | 2.316839241                                 | 0.372102187                               | 4.801115597                       | 2.266159547                             |
| 15.88888889                        | 2.226424882                                 | 0.308137136                               | 3.952925676                       | 3.285714286                             |
| 6.309208247                        | 2.506189977                                 | 0.365480284                               | 6.572042668                       | 1.714965582                             |
| 13.67965399                        | 2.949086528                                 | 0.29919528                                | 6.650324085                       | 2.808049219                             |
| 6.925913033                        | 2.530469363                                 | 0.382730809                               | 6.388100707                       | 1.99940747                              |
| 4.055747291                        | 2.22755322                                  | 0.427381441                               | 6.345865661                       | 1.419713652                             |
| 2.758490001                        | 2.014183798                                 | 0.386567475                               | 5.52515204                        | 1.07334077                              |
| 34.06596198                        | 3.264822575                                 | 0.182527764                               | 5.802919723                       | 4.802862881                             |
| 15.71542491                        | 3.071305996                                 | 0.288509165                               | 7.607063757                       | 3.074959104                             |
| 10.64711912                        | 2.282315356                                 | 0.315436558                               | 3.877961106                       | 2.597277936                             |
| 18.06467016                        | 3.078763329                                 | 0.241913992                               | 6.746137115                       | 3.411982387                             |
| 9.308455915                        | 2.713045726                                 | 0.349874888                               | 6.667355926                       | 2.307307467                             |

| log.sigma.4.5.mm.3D_glcml_DifferenceVariance | log.sigma.4.5.mm.3D_glcml_ldn | log.sigma.4.5.mm.3D_glcml_ldm | log.sigma.4.5.mm.3D_glcml_Correlation | log.sigma.4.5.mm.3D_glcml_Autocorrelation |
|----------------------------------------------|-------------------------------|-------------------------------|---------------------------------------|-------------------------------------------|
| 3.941222909                                  | 0.899675615                   | 0.318533895                   | 0.724714348                           | 120.7187249                               |
| 2.396064662                                  | 0.922145395                   | 0.464693529                   | 0.741003967                           | 111.97486                                 |
| 3.290760012                                  | 0.869635508                   | 0.301679291                   | 0.502192319                           | 52.1994779                                |
| 5.134893785                                  | 0.924042423                   | 0.344194063                   | 0.638979712                           | 205.3906263                               |
| 10.87785294                                  | 0.863572569                   | 0.173515417                   | 0.55996542                            | 168.0983591                               |
| 3.802012844                                  | 0.867469707                   | 0.327429547                   | 0.423902429                           | 38.78527896                               |
| 3.075490383                                  | 0.862406677                   | 0.374037343                   | 0.258879775                           | 19.04262083                               |
| 7.5544995                                    | 0.894999249                   | 0.261927002                   | 0.500690524                           | 76.11324794                               |
| 15.22851281                                  | 0.90055145                    | 0.213485047                   | 0.78163743                            | 423.5224305                               |
| 2.017324438                                  | 0.939881719                   | 0.467904789                   | 0.735736196                           | 142.0546877                               |
| 4.457779732                                  | 0.880147123                   | 0.317104253                   | 0.395350069                           | 43.63925572                               |
| 3.299806209                                  | 0.918763753                   | 0.366874784                   | 0.668153229                           | 98.07176208                               |
| 3.534223293                                  | 0.916218399                   | 0.391620925                   | 0.565027908                           | 45.80385999                               |
| 5.09159727                                   | 0.900135586                   | 0.315359502                   | 0.579754803                           | 86.75384188                               |
| 5.62532277                                   | 0.886450697                   | 0.282068863                   | 0.509130698                           | 81.54246423                               |
| 1.155176861                                  | 0.974461905                   | 0.738270767                   | 0.813647704                           | 191.5219281                               |
| 6.081058629                                  | 0.859887953                   | 0.223382623                   | 0.464481782                           | 78.63473707                               |
| 3.666099642                                  | 0.926898705                   | 0.391688045                   | 0.577954961                           | 77.42953973                               |
| 10.11922775                                  | 0.853001006                   | 0.186916814                   | 0.486557399                           | 121.4928364                               |
| 1.525694153                                  | 0.933357463                   | 0.52539082                    | 0.813156436                           | 87.0216821                                |
| 1.214295261                                  | 0.955575666                   | 0.598692003                   | 0.787148228                           | 116.8690045                               |
| 4.538375722                                  | 0.907832011                   | 0.358013321                   | 0.612530327                           | 84.71602318                               |
| 1.568522762                                  | 0.950666274                   | 0.554051003                   | 0.780242869                           | 156.6160793                               |
| 6.469544095                                  | 0.877913887                   | 0.220346497                   | 0.702621316                           | 188.1995182                               |
| 1.601487832                                  | 0.927468233                   | 0.510127554                   | 0.727242209                           | 62.68918135                               |
| 3.963268734                                  | 0.884063791                   | 0.314281592                   | 0.49477584                            | 69.19781167                               |
| 1.702346955                                  | 0.948923918                   | 0.543945428                   | 0.695253427                           | 105.0498429                               |
| 1.463629653                                  | 0.966596255                   | 0.632375921                   | 0.836922507                           | 123.5814078                               |
| 3.087856949                                  | 0.953949873                   | 0.525837014                   | 0.761685701                           | 202.0582175                               |
| 2.059028208                                  | 0.936455957                   | 0.484583669                   | 0.818448538                           | 148.1035271                               |
| 1.546491909                                  | 0.951179467                   | 0.576523926                   | 0.786925594                           | 118.1713231                               |
| 1.974600839                                  | 0.963785753                   | 0.621076319                   | 0.734385325                           | 134.6464599                               |
| 4.056536173                                  | 0.917802547                   | 0.345701996                   | 0.667102807                           | 112.2077509                               |
| 4.277836538                                  | 0.804675088                   | 0.189072389                   | 0.244481937                           | 54.50641026                               |
| 7.045665242                                  | 0.86730129                    | 0.211146535                   | 0.467260924                           | 115.6908227                               |
| 4.167619703                                  | 0.901990737                   | 0.336018402                   | 0.521203641                           | 89.31499987                               |
| 1.597938697                                  | 0.958911254                   | 0.632095437                   | 0.817149811                           | 139.322116                                |
| 2.060955551                                  | 0.939647796                   | 0.48943612                    | 0.780010715                           | 101.1485636                               |
| 6.784291552                                  | 0.890667156                   | 0.254187692                   | 0.641610783                           | 145.9200685                               |
| 3.718956991                                  | 0.892900892                   | 0.327468055                   | 0.669411204                           | 74.65132548                               |
| 2.913576687                                  | 0.929763943                   | 0.406009593                   | 0.736362333                           | 160.1611445                               |
| 6.769771492                                  | 0.901683011                   | 0.299762901                   | 0.495714738                           | 94.38378763                               |
| 4.451114776                                  | 0.896927307                   | 0.324025726                   | 0.397491438                           | 75.53625968                               |
| 6.965633145                                  | 0.901741526                   | 0.28601718                    | 0.548567379                           | 79.72305038                               |
| 4.337972429                                  | 0.905201984                   | 0.323589903                   | 0.672385434                           | 94.31465201                               |
| 0.693854449                                  | 0.958843212                   | 0.723515761                   | 0.852517795                           | 88.22682517                               |
| 6.718048186                                  | 0.936635838                   | 0.310818893                   | 0.668193635                           | 156.1460177                               |
| 5.50944792                                   | 0.870095141                   | 0.297524984                   | 0.418346239                           | 46.41575847                               |
| 6.552147931                                  | 0.797983078                   | 0.17781399                    | 0.030867864                           | 39.98716839                               |
| 13.85027311                                  | 0.85719381                    | 0.151827006                   | 0.467029322                           | 210.5658053                               |
| 1.784575759                                  | 0.949023812                   | 0.570537433                   | 0.786128859                           | 120.6132976                               |
| 4.34113735                                   | 0.881973024                   | 0.342184139                   | 0.277161083                           | 37.65327001                               |
| 2.887347622                                  | 0.932821546                   | 0.415838943                   | 0.712962571                           | 135.6988975                               |
| 3.686634962                                  | 0.883608153                   | 0.315824976                   | 0.608502149                           | 73.06138169                               |
| 1.351474272                                  | 0.961693678                   | 0.676971503                   | 0.813471751                           | 129.1551202                               |
| 7.370971631                                  | 0.870885145                   | 0.230397132                   | 0.457246729                           | 113.1884004                               |
| 5.908636505                                  | 0.903163427                   | 0.266923058                   | 0.440973049                           | 125.2230786                               |
| 10.18596064                                  | 0.874249124                   | 0.19551263                    | 0.554603121                           | 217.4257524                               |
| 3.849909827                                  | 0.900180343                   | 0.320242883                   | 0.631022686                           | 76.94072834                               |
| 2.21455277                                   | 0.907272901                   | 0.377395404                   | 0.736830366                           | 75.87619251                               |
| 3.044133247                                  | 0.912493622                   | 0.382291152                   | 0.607943918                           | 70.83789386                               |
| 3.691128484                                  | 0.953983638                   | 0.497185886                   | 0.748129688                           | 221.5746412                               |
| 1.410178544                                  | 0.948914963                   | 0.570924967                   | 0.763683334                           | 72.39024889                               |
| 1.643753206                                  | 0.918168324                   | 0.51566784                    | 0.721174674                           | 66.72966012                               |
| 3.525643296                                  | 0.839202137                   | 0.212750556                   | 0.281311398                           | 61.92752212                               |
| 4.220558913                                  | 0.917154826                   | 0.347000286                   | 0.617030327                           | 116.9512271                               |
| 8.818812078                                  | 0.843118756                   | 0.185523333                   | 0.334706851                           | 111.8472319                               |
| 3.307945156                                  | 0.933564057                   | 0.450113268                   | 0.776986692                           | 125.0878503                               |
| 6.159920658                                  | 0.849583079                   | 0.240043767                   | 0.381481867                           | 54.9994297                                |
| 2.526173162                                  | 0.9212258                     | 0.439443617                   | 0.711988816                           | 96.01043003                               |
| 3.171248242                                  | 0.923584117                   | 0.427926944                   | 0.671126162                           | 111.8564104                               |
| 4.61809593                                   | 0.904842045                   | 0.336392789                   | 0.498442183                           | 74.288464                                 |
| 1.521164437                                  | 0.955458762                   | 0.596968473                   | 0.820963324                           | 156.323475                                |
| 1.148607048                                  | 0.951703556                   | 0.657402511                   | 0.840906464                           | 80.33150295                               |
| 2.011151939                                  | 0.966066367                   | 0.659225396                   | 0.758120508                           | 136.2488622                               |
| 7.332794274                                  | 0.884600189                   | 0.254049156                   | 0.441923296                           | 117.6039911                               |
| 4.189669876                                  | 0.894613174                   | 0.330916247                   | 0.395640242                           | 53.95070511                               |
| 5.342024317                                  | 0.881863814                   | 0.310698934                   | 0.423078629                           | 36.32073364                               |
| 3.535103524                                  | 0.902178258                   | 0.366746826                   | 0.477405401                           | 87.83599077                               |
| 2.489223071                                  | 0.946365504                   | 0.505586728                   | 0.718196108                           | 192.616008                                |
| 8.966539978                                  | 0.851417998                   | 0.206986696                   | 0.308048365                           | 108.3644375                               |
| 5.04593937                                   | 0.913472358                   | 0.323761075                   | 0.603712486                           | 138.3331993                               |
| 3.015145227                                  | 0.952129339                   | 0.512953566                   | 0.727212846                           | 214.0432342                               |
| 5.290495033                                  | 0.816909066                   | 0.246800943                   | 0.170341426                           | 49.15247829                               |
| 1.847554132                                  | 0.943176024                   | 0.561127493                   | 0.727463171                           | 106.4545452                               |
| 2.591534752                                  | 0.923534619                   | 0.456318412                   | 0.574753983                           | 61.67797931                               |
| 4.393178057                                  | 0.898789177                   | 0.324085368                   | 0.522221305                           | 52.69956639                               |
| 9.364504966                                  | 0.891713521                   | 0.214435505                   | 0.439683371                           | 234.9547345                               |
| 2.782332788                                  | 0.84333813                    | 0.346317732                   | 0.066870381                           | 39.64490571                               |
| 4.976442429                                  | 0.788089186                   | 0.218291452                   | 0.075069685                           | 22.94444444                               |
| 3.278503197                                  | 0.948842816                   | 0.480642215                   | 0.774058178                           | 236.5652747                               |
| 5.416432993                                  | 0.89019997                    | 0.306796107                   | 0.558420068                           | 45.7032829                                |
| 2.778330708                                  | 0.890564202                   | 0.387656373                   | 0.563711166                           | 43.57662149                               |
| 1.976438899                                  | 0.937508804                   | 0.504731467                   | 0.79337839                            | 131.4893384                               |
| 1.579344769                                  | 0.952201272                   | 0.605337256                   | 0.813102584                           | 113.4904582                               |
| 9.911113992                                  | 0.857850129                   | 0.169308484                   | 0.270222774                           | 187.8139138                               |
| 6.007235764                                  | 0.897049091                   | 0.278319175                   | 0.602462822                           | 125.1222471                               |
| 3.436707243                                  | 0.797373432                   | 0.310148942                   | 0.070034912                           | 15.06401739                               |
| 6.060768983                                  | 0.882668533                   | 0.246388007                   | 0.657068333                           | 136.7733214                               |
| 3.820261327                                  | 0.910709462                   | 0.35569541                    | 0.661011871                           | 128.1819581                               |

| log.sigma.4.5.mm.3D_glcm_SumEntropy | log.sigma.4.5.mm.3D_glcm_AverageIntensity | log.sigma.4.5.mm.3D_glcm_Energy | log.sigma.4.5.mm.3D_glcm_SumSquares | log.sigma.4.5.mm.3D_glcm_ClusterProminence |
|-------------------------------------|-------------------------------------------|---------------------------------|-------------------------------------|--------------------------------------------|
| 4.879255093                         | 10.3484631                                | 0.008522594                     | 18.80715698                         | 8606.413444                                |
| 4.473198036                         | 10.2258049                                | 0.017754012                     | 9.992434757                         | 2928.986995                                |
| 4.302091103                         | 6.852908862                               | 0.015938662                     | 10.33876517                         | 2659.10194                                 |
| 4.87716181                          | 13.98011506                               | 0.008363344                     | 16.53814664                         | 8756.710813                                |
| 4.81107886                          | 12.13368304                               | 0.011419689                     | 40.70732956                         | 36856.57334                                |
| 4.199754849                         | 5.918299738                               | 0.014736025                     | 8.853749187                         | 1590.425906                                |
| 3.380257313                         | 4.211019776                               | 0.037347797                     | 5.222173549                         | 725.1412586                                |
| 4.757700074                         | 8.145604381                               | 0.007801921                     | 19.56483847                         | 12339.39633                                |
| 5.925639608                         | 19.15615439                               | 0.002554651                     | 86.21185188                         | 201372.9646                                |
| 4.457229705                         | 11.65190104                               | 0.0169461                       | 8.521543132                         | 2562.618778                                |
| 4.27450223                          | 6.300913505                               | 0.013451914                     | 9.794956309                         | 2281.023353                                |
| 4.653176526                         | 9.468582975                               | 0.010452083                     | 12.54526395                         | 4368.443772                                |
| 4.312330315                         | 6.371653656                               | 0.016042334                     | 9.152387701                         | 3783.767421                                |
| 4.701837818                         | 8.824387831                               | 0.009703177                     | 15.28439011                         | 7040.486894                                |
| 4.663287413                         | 8.588371107                               | 0.008529931                     | 15.34190847                         | 6153.88913                                 |
| 3.452371348                         | 13.70918409                               | 0.125644825                     | 4.392164268                         | 2018.733355                                |
| 4.674618619                         | 8.369952664                               | 0.009281119                     | 18.8908708                          | 7117.61179                                 |
| 4.466284982                         | 8.473583079                               | 0.012535859                     | 9.726452361                         | 3184.930639                                |
| 4.988611182                         | 10.2956896                                | 0.007778722                     | 31.96403988                         | 21279.84216                                |
| 4.395106371                         | 8.939686925                               | 0.023081039                     | 8.727540566                         | 2045.412287                                |
| 3.973693045                         | 10.6111937                                | 0.046956145                     | 5.418695547                         | 1082.30255                                 |
| 4.647531246                         | 8.727517537                               | 0.01187374                      | 13.80426254                         | 7154.687381                                |
| 4.209874341                         | 12.29413686                               | 0.030411968                     | 7.000401109                         | 2477.917448                                |
| 4.868002071                         | 12.78313285                               | 0.011619245                     | 35.21378712                         | 27997.33387                                |
| 4.146156307                         | 7.621254373                               | 0.02417082                      | 6.320771418                         | 1300.086421                                |
| 4.410439729                         | 7.998641913                               | 0.011327747                     | 10.52667478                         | 2488.688607                                |
| 4.050939439                         | 10.06271946                               | 0.034120401                     | 5.445578025                         | 1375.449166                                |
| 3.932010818                         | 10.82634377                               | 0.082658393                     | 7.605739204                         | 2592.183732                                |
| 4.323194313                         | 13.90031343                               | 0.049762522                     | 11.73510387                         | 4861.757395                                |
| 4.5773884                           | 11.75268893                               | 0.019910745                     | 12.1665031                          | 4518.596466                                |
| 4.118225403                         | 10.62057071                               | 0.043931131                     | 6.818046009                         | 1705.730616                                |
| 3.908548828                         | 11.41087263                               | 0.068738081                     | 6.033893514                         | 1824.201998                                |
| 4.793079134                         | 10.11420432                               | 0.008487883                     | 14.84491293                         | 5994.330433                                |
| 2.197869589                         | 7.109294872                               | 0.11940438                      | 15.14057025                         | 3030.785484                                |
| 4.551912257                         | 10.29546708                               | 0.012562939                     | 20.5145989                          | 9039.918843                                |
| 4.514902266                         | 9.150003453                               | 0.01037868                      | 10.75435623                         | 3119.103883                                |
| 3.909627056                         | 11.54887963                               | 0.071977598                     | 7.267279701                         | 2435.055845                                |
| 4.503311849                         | 9.662066222                               | 0.019106741                     | 9.968185516                         | 2727.337667                                |
| 5.07376152                          | 11.33576531                               | 0.006802088                     | 26.98284049                         | 17732.33982                                |
| 4.690662256                         | 8.034043784                               | 0.009612887                     | 15.05616438                         | 5310.347765                                |
| 4.669504901                         | 12.27636096                               | 0.012997368                     | 12.8002616                          | 5286.355296                                |
| 4.542411679                         | 9.295296598                               | 0.011716395                     | 16.28541161                         | 10415.11403                                |
| 4.352146332                         | 8.469090687                               | 0.01134606                      | 9.524101065                         | 2176.560281                                |
| 4.745038868                         | 8.319849408                               | 0.009114376                     | 19.21434885                         | 11988.21816                                |
| 4.783123333                         | 9.103782791                               | 0.009281315                     | 17.0003521                          | 12679.1494                                 |
| 3.406318503                         | 9.212869274                               | 0.111513724                     | 3.915777221                         | 781.3704906                                |
| 5.022343448                         | 11.97152269                               | 0.006867462                     | 23.56359491                         | 36041.35637                                |
| 4.397589218                         | 6.411942585                               | 0.01256089                      | 12.49096585                         | 3538.413781                                |
| 2.695457154                         | 6.293095793                               | 0.076362038                     | 11.60895536                         | 1527.450356                                |
| 5.068456671                         | 13.86694528                               | 0.008222097                     | 43.84883495                         | 36657.77834                                |
| 4.153635171                         | 10.70384707                               | 0.04898653                      | 7.676312267                         | 2116.841641                                |
| 4.006785072                         | 5.96970108                                | 0.018061164                     | 7.358467398                         | 1257.638629                                |
| 4.591890967                         | 11.28913291                               | 0.01384317                      | 11.57547406                         | 3695.613367                                |
| 4.577862165                         | 8.057442605                               | 0.011041354                     | 13.37431496                         | 4277.070065                                |
| 3.689599353                         | 11.1593374                                | 0.0996123                       | 5.678879251                         | 1707.273571                                |
| 4.821823993                         | 10.21081967                               | 0.0069246                       | 19.60147696                         | 8120.477024                                |
| 4.66184112                          | 10.90868785                               | 0.007526578                     | 14.7965888                          | 5575.885155                                |
| 5.238310246                         | 14.11265852                               | 0.00474828                      | 35.87954699                         | 29724.12785                                |
| 4.66378072                          | 8.251790864                               | 0.010311215                     | 13.9422505                          | 5770.462208                                |
| 4.599919125                         | 8.194914699                               | 0.012548855                     | 11.7977249                          | 3659.816302                                |
| 4.396892231                         | 8.072612901                               | 0.01335852                      | 9.323465813                         | 2555.776682                                |
| 4.621950301                         | 14.5702021                                | 0.026069119                     | 13.36814429                         | 6905.856313                                |
| 4.089321001                         | 8.237540786                               | 0.035867545                     | 5.926734493                         | 1224.648448                                |
| 4.149206734                         | 7.882003306                               | 0.02533462                      | 6.369813186                         | 1015.455295                                |
| 3.822316667                         | 7.642871439                               | 0.026118808                     | 12.48163988                         | 2369.488804                                |
| 4.697840228                         | 10.42733241                               | 0.009677386                     | 13.3258027                          | 5018.409658                                |
| 4.478153889                         | 10.2133826                                | 0.013437222                     | 21.99277327                         | 8300.555468                                |
| 4.707954163                         | 10.64535631                               | 0.017507266                     | 15.12460993                         | 5993.56433                                 |
| 4.406885218                         | 7.027489308                               | 0.012588129                     | 14.82574718                         | 4500.766576                                |
| 4.498361493                         | 9.435797017                               | 0.01405841                      | 9.787912985                         | 2523.624084                                |
| 4.544644706                         | 10.24163526                               | 0.013162258                     | 10.36044055                         | 2973.454541                                |
| 4.444321884                         | 8.295118251                               | 0.011362339                     | 10.95652239                         | 4104.078348                                |
| 4.063858465                         | 12.24888304                               | 0.051093081                     | 7.654968569                         | 2061.666961                                |
| 3.892780676                         | 8.670667801                               | 0.071789251                     | 6.114970756                         | 1455.452233                                |
| 3.755381262                         | 11.46926658                               | 0.091942645                     | 6.208372321                         | 2352.2841                                  |
| 4.775633844                         | 10.47016774                               | 0.007744705                     | 18.24945571                         | 7350.345771                                |
| 4.222074405                         | 7.095717175                               | 0.014251796                     | 9.033095901                         | 1959.383401                                |
| 4.206533666                         | 5.617140781                               | 0.017007771                     | 11.38828624                         | 3342.450449                                |
| 4.310665255                         | 9.152693689                               | 0.012914258                     | 8.374602175                         | 1805.355074                                |
| 4.273161946                         | 13.65509223                               | 0.029469715                     | 8.558679246                         | 2534.009508                                |
| 4.526273671                         | 10.12015696                               | 0.011106432                     | 19.59850377                         | 7329.972876                                |
| 4.792268058                         | 11.36255638                               | 0.008450074                     | 15.31695012                         | 7352.589303                                |
| 4.391941242                         | 14.37978121                               | 0.030761194                     | 10.16989763                         | 4229.158749                                |
| 3.211262876                         | 6.877738394                               | 0.046570226                     | 9.794214869                         | 1116.645083                                |
| 4.077398029                         | 10.09476104                               | 0.037550245                     | 6.246883684                         | 1288.585199                                |
| 4.201982074                         | 7.611305967                               | 0.018382991                     | 6.523958659                         | 1272.237524                                |
| 4.420840177                         | 6.831658218                               | 0.012224066                     | 11.49902359                         | 4554.520023                                |
| 4.989201267                         | 15.12634097                               | 0.00606963                      | 25.1840116                          | 15289.59371                                |
| 3.139664933                         | 6.269591626                               | 0.041174325                     | 4.473746082                         | 224.5048812                                |
| 2.509298741                         | 4.718253968                               | 0.066043084                     | 8.561444948                         | 897.9637241                                |
| 4.61443034                          | 15.03066486                               | 0.024489694                     | 14.09405843                         | 6998.511434                                |
| 4.467277786                         | 6.071031895                               | 0.013181133                     | 15.66567713                         | 9041.427126                                |
| 4.24243411                          | 6.253677504                               | 0.01497622                      | 7.922849771                         | 1429.285896                                |
| 4.525702695                         | 11.12089084                               | 0.018899374                     | 9.841472192                         | 2884.947744                                |
| 4.099768798                         | 10.36604768                               | 0.057600763                     | 7.413231093                         | 1888.578713                                |
| 4.186487392                         | 13.49445883                               | 0.019338039                     | 23.72803537                         | 9800.001382                                |
| 4.948048375                         | 10.64028823                               | 0.006448184                     | 19.74355186                         | 10646.95213                                |
| 2.616088522                         | 3.800701008                               | 0.075614892                     | 5.63975167                          | 383.9853755                                |
| 4.779804019                         | 10.92092222                               | 0.010877764                     | 26.48010095                         | 18201.32024                                |
| 4.617411107                         | 10.91244329                               | 0.013107519                     | 13.72489564                         | 5507.355165                                |

| log.sigma.4.5.mm.3D_glc_m_SumAverage | log.sigma.4.5.mm.3D_glc_m_lmc2 | log.sigma.4.5.mm.3D_glc_m_lmc1 | log.sigma.4.5.mm.3D_glc_m_DifferenceAverage | log.sigma.4.5.mm.3D_glc_m_Id |
|--------------------------------------|--------------------------------|--------------------------------|---------------------------------------------|------------------------------|
| 20.69692621                          | 0.923815335                    | -0.239217886                   | 2.502588179                                 | 0.40159292                   |
| 20.4516098                           | 0.881367762                    | -0.219938621                   | 1.635042896                                 | 0.522046828                  |
| 13.70581772                          | 0.895526839                    | -0.233573933                   | 2.583377468                                 | 0.39176594                   |
| 27.92622271                          | 0.820327169                    | -0.147838387                   | 2.539131157                                 | 0.421267742                  |
| 24.14247467                          | 0.994922399                    | -0.521685017                   | 4.762681683                                 | 0.271428987                  |
| 11.83659948                          | 0.805521925                    | -0.154780585                   | 2.50159126                                  | 0.409676412                  |
| 8.422039551                          | 0.927344027                    | -0.338558794                   | 2.129960278                                 | 0.447653634                  |
| 16.28594848                          | 0.870971542                    | -0.178596173                   | 3.404184088                                 | 0.350770802                  |
| 37.81209804                          | 0.931612195                    | -0.206700407                   | 4.639261857                                 | 0.303246035                  |
| 23.30380209                          | 0.857455184                    | -0.195708062                   | 1.54959635                                  | 0.523847038                  |
| 12.60182701                          | 0.766528735                    | -0.130860847                   | 2.66182277                                  | 0.399676727                  |
| 18.93716595                          | 0.85898562                     | -0.18696569                    | 2.16336314                                  | 0.442364045                  |
| 12.74330731                          | 0.735522139                    | -0.12240774                    | 2.062325546                                 | 0.460986994                  |
| 17.64877566                          | 0.849813594                    | -0.171147369                   | 2.742314879                                 | 0.397358768                  |
| 17.17674221                          | 0.872974197                    | -0.18513812                    | 3.036562598                                 | 0.370520932                  |
| 27.41836819                          | 0.90863722                     | -0.344488529                   | 0.671318215                                 | 0.754402453                  |
| 16.73990533                          | 0.933193318                    | -0.259025857                   | 3.6941755                                   | 0.319980828                  |
| 16.94716616                          | 0.770177124                    | -0.132643254                   | 2.099170219                                 | 0.461578021                  |
| 20.59137919                          | 0.975077199                    | -0.347697856                   | 4.668262553                                 | 0.282403814                  |
| 17.87937385                          | 0.909673242                    | -0.262002298                   | 1.2936439                                   | 0.571696487                  |
| 21.2223874                           | 0.888747987                    | -0.261906134                   | 1.028800357                                 | 0.63353867                   |
| 17.45503507                          | 0.826030445                    | -0.162554977                   | 2.409871342                                 | 0.434242652                  |
| 24.58827373                          | 0.894226261                    | -0.253077816                   | 1.205659011                                 | 0.594394556                  |
| 25.56626571                          | 0.990817114                    | -0.473632763                   | 3.718205373                                 | 0.317878648                  |
| 15.24250875                          | 0.865291095                    | -0.219700624                   | 1.33422896                                  | 0.557609389                  |
| 15.99728383                          | 0.851484269                    | -0.179267765                   | 2.545532373                                 | 0.399432914                  |
| 20.12543892                          | 0.834140149                    | -0.197683954                   | 1.252746453                                 | 0.586254623                  |
| 21.6524297                           | 0.923300688                    | -0.323410831                   | 0.982476427                                 | 0.665200106                  |
| 27.7944113                           | 0.899371671                    | -0.25311122                    | 1.540723683                                 | 0.576165328                  |
| 23.50537785                          | 0.915947526                    | -0.258777386                   | 1.511836663                                 | 0.539291475                  |
| 21.24114143                          | 0.893621882                    | -0.258826089                   | 1.143498045                                 | 0.615683138                  |
| 22.82138237                          | 0.882092732                    | -0.257074929                   | 1.079204944                                 | 0.653895619                  |
| 20.22840865                          | 0.830289907                    | -0.156035527                   | 2.380505355                                 | 0.424830559                  |
| 14.21858974                          | 0.995743155                    | -0.886354267                   | 4.010897436                                 | 0.287557775                  |
| 20.59093416                          | 0.980130718                    | -0.407178378                   | 3.781306847                                 | 0.310061708                  |
| 18.30000691                          | 0.720331285                    | -0.105230131                   | 2.45014778                                  | 0.416678371                  |
| 23.09775927                          | 0.909199416                    | -0.300273655                   | 1.007079876                                 | 0.664225394                  |
| 19.32413244                          | 0.886407756                    | -0.22460854                    | 1.496653395                                 | 0.54263232                   |
| 22.66813611                          | 0.944437521                    | -0.266367566                   | 3.427452032                                 | 0.345286162                  |
| 16.06808757                          | 0.859678474                    | -0.180288501                   | 2.447264577                                 | 0.410629561                  |
| 24.55272192                          | 0.90272171                     | -0.228252704                   | 1.920840792                                 | 0.474912293                  |
| 18.58685424                          | 0.866628394                    | -0.184959297                   | 3.058159868                                 | 0.382948791                  |
| 16.93818137                          | 0.680542713                    | -0.095276785                   | 2.597203469                                 | 0.406323873                  |
| 16.63578725                          | 0.876738208                    | -0.186385642                   | 3.163757049                                 | 0.370904397                  |
| 18.20756558                          | 0.825486777                    | -0.151867235                   | 2.572939548                                 | 0.406523897                  |
| 18.42573855                          | 0.907129153                    | -0.355064128                   | 0.646132952                                 | 0.740816451                  |
| 23.76305885                          | 0.83134293                     | -0.148118107                   | 2.854115725                                 | 0.393418119                  |
| 12.82388517                          | 0.862885963                    | -0.188998066                   | 2.941501071                                 | 0.381350205                  |
| 12.58619159                          | 0.995020335                    | -0.775234806                   | 3.912887113                                 | 0.28810391                   |
| 27.58579888                          | 0.990728973                    | -0.44191825                    | 5.557949648                                 | 0.247327605                  |
| 21.40769415                          | 0.898674502                    | -0.262136668                   | 1.203136012                                 | 0.611696445                  |
| 11.93940216                          | 0.699362412                    | -0.103978684                   | 2.48567637                                  | 0.421299397                  |
| 22.57826582                          | 0.837153694                    | -0.174232493                   | 1.904528524                                 | 0.482538975                  |
| 16.11488521                          | 0.904527585                    | -0.227375155                   | 2.551813546                                 | 0.402221141                  |
| 22.3186748                           | 0.900906871                    | -0.306104262                   | 0.85608613                                  | 0.702552159                  |
| 20.42163934                          | 0.888806223                    | -0.192377517                   | 3.681992473                                 | 0.324642089                  |
| 21.80198034                          | 0.770573431                    | -0.119651487                   | 3.194288624                                 | 0.357216195                  |
| 28.12107628                          | 0.938544317                    | -0.238418814                   | 4.487674026                                 | 0.29066272                   |
| 16.50358173                          | 0.89271838                     | -0.21090245                    | 2.487591606                                 | 0.405657021                  |
| 16.3898294                           | 0.891059571                    | -0.223911406                   | 1.951014062                                 | 0.452675302                  |
| 16.1452258                           | 0.773425075                    | -0.133413138                   | 2.04740837                                  | 0.45509966                   |
| 29.0973361                           | 0.899874749                    | -0.232276108                   | 1.690643899                                 | 0.549239378                  |
| 16.47508157                          | 0.871749128                    | -0.241157996                   | 1.141339431                                 | 0.608688524                  |
| 15.76400661                          | 0.859304711                    | -0.215587589                   | 1.350009953                                 | 0.564909401                  |
| 15.28574288                          | 0.983643521                    | -0.48625432                    | 3.516253015                                 | 0.313938248                  |
| 20.85466482                          | 0.822370106                    | -0.156290215                   | 2.406669187                                 | 0.424654431                  |
| 20.4267652                           | 0.981769424                    | -0.418875241                   | 4.437399552                                 | 0.283397539                  |
| 21.29071262                          | 0.89894322                     | -0.224292037                   | 1.827212671                                 | 0.510374858                  |
| 14.05497862                          | 0.922862102                    | -0.258548469                   | 3.469006919                                 | 0.334185282                  |
| 18.87159403                          | 0.846512609                    | -0.182753687                   | 1.73928783                                  | 0.501279082                  |
| 20.48327051                          | 0.825463707                    | -0.168987551                   | 1.866907157                                 | 0.490972799                  |
| 16.5902365                           | 0.796291607                    | -0.140460776                   | 2.489380983                                 | 0.416150115                  |
| 24.49766081                          | 0.908682318                    | -0.283070765                   | 1.087520389                                 | 0.633612555                  |
| 17.3413356                           | 0.921591993                    | -0.323250929                   | 0.874950887                                 | 0.685095085                  |
| 22.93820141                          | 0.887076753                    | -0.272438328                   | 0.980194192                                 | 0.687265279                  |
| 20.94033548                          | 0.868645904                    | -0.177205857                   | 3.52493082                                  | 0.343833674                  |
| 14.19143435                          | 0.756025724                    | -0.126226611                   | 2.53845916                                  | 0.411509778                  |
| 11.23428156                          | 0.861884627                    | -0.194591808                   | 2.775423302                                 | 0.392623598                  |
| 18.30538738                          | 0.719040292                    | -0.11548114                    | 2.219634958                                 | 0.441072132                  |
| 27.31018446                          | 0.877387697                    | -0.221970437                   | 1.504840827                                 | 0.557860403                  |
| 20.24031392                          | 0.972590706                    | -0.360652995                   | 4.188714374                                 | 0.302182264                  |
| 22.72304584                          | 0.831966689                    | -0.152912595                   | 2.629268184                                 | 0.404933026                  |
| 28.7523542                           | 0.874175045                    | -0.219967567                   | 1.550692245                                 | 0.562455572                  |
| 13.75547679                          | 0.99209768                     | -0.637121609                   | 3.233437289                                 | 0.341470342                  |
| 20.18952207                          | 0.861349669                    | -0.221021938                   | 1.228396306                                 | 0.601862134                  |
| 15.22261193                          | 0.726336861                    | -0.126543251                   | 1.691105247                                 | 0.513861717                  |
| 13.66331644                          | 0.822589192                    | -0.158699101                   | 2.539709366                                 | 0.406056165                  |
| 29.96018104                          | 0.876913137                    | -0.173636065                   | 4.141749624                                 | 0.308201419                  |
| 12.53918325                          | 0.922898587                    | -0.342720993                   | 2.266159547                                 | 0.423415174                  |
| 9.436507937                          | 0.993162646                    | -0.714877395                   | 3.285714286                                 | 0.314295163                  |
| 30.04660921                          | 0.90474411                     | -0.238283176                   | 1.714965582                                 | 0.536909941                  |
| 12.14206379                          | 0.887287544                    | -0.213104388                   | 2.808049219                                 | 0.391888916                  |
| 12.50735501                          | 0.809451845                    | -0.161619931                   | 1.99940747                                  | 0.459158611                  |
| 22.24178169                          | 0.90681584                     | -0.24961642                    | 1.419713652                                 | 0.554498183                  |
| 20.73209536                          | 0.912078775                    | -0.285412206                   | 1.07334077                                  | 0.641381353                  |
| 26.93148152                          | 0.990768558                    | -0.517467954                   | 4.802862881                                 | 0.266684056                  |
| 21.28057646                          | 0.852389114                    | -0.161424053                   | 3.074959104                                 | 0.366487486                  |
| 7.601402017                          | 0.971659668                    | -0.568985714                   | 2.597277936                                 | 0.395399559                  |
| 21.84184445                          | 0.980666888                    | -0.390701912                   | 3.411982387                                 | 0.340449037                  |
| 21.82488657                          | 0.931382071                    | -0.265227151                   | 2.307307467                                 | 0.432568536                  |

| log.sigma.4.5.mm.3D_glcm_ClusterTendency | log.sigma.4.5.mm.3D_firstorder_InterquartileRange | log.sigma.4.5.mm.3D_firstorder_Skewness | log.sigma.4.5.mm.3D_firstorder_Uniformity |
|------------------------------------------|---------------------------------------------------|-----------------------------------------|-------------------------------------------|
| 64.85742575                              | 167.5886154                                       | -0.036224522                            | 0.063328243                               |
| 34.7935643                               | 121.6908951                                       | -0.434414375                            | 0.091221387                               |
| 31.04414524                              | 113.556282                                        | 0.335704661                             | 0.09176801                                |
| 53.4603614                               | 141.4381447                                       | 0.169819619                             | 0.068506826                               |
| 123.661973                               | 229.2808762                                       | 0.376972641                             | 0.050877365                               |
| 25.1948                                  | 123.5382576                                       | 0.223626016                             | 0.091306101                               |
| 12.84822845                              | 81.88196087                                       | 0.629146931                             | 0.118367347                               |
| 58.56199742                              | 166.6038208                                       | 0.622279981                             | 0.061697378                               |
| 301.5064361                              | 286.4996109                                       | 0.610199754                             | 0.036798349                               |
| 29.61424241                              | 103.1524906                                       | -0.055465639                            | 0.093919942                               |
| 27.38512121                              | 133.8453445                                       | 0.488676197                             | 0.083875622                               |
| 41.91853581                              | 139.9526291                                       | 0.19185283                              | 0.074686458                               |
| 28.69910853                              | 102.9396534                                       | 1.092481092                             | 0.097343131                               |
| 48.31002192                              | 159.8644924                                       | 0.436558004                             | 0.068669651                               |
| 46.20222358                              | 141.2202024                                       | 0.308341583                             | 0.069556817                               |
| 15.94409236                              | 31.82187414                                       | -1.799284073                            | 0.227138107                               |
| 54.75911111                              | 163.6834869                                       | 0.04782663                              | 0.065599185                               |
| 30.70460458                              | 103.3213615                                       | 0.498621632                             | 0.088168575                               |
| 94.71368807                              | 225.0211105                                       | 0.096428485                             | 0.051141167                               |
| 31.6563849                               | 119.3790646                                       | -0.298430832                            | 0.098984597                               |
| 19.37671524                              | 90.71999645                                       | -0.540420997                            | 0.132516567                               |
| 44.65565724                              | 131.0279427                                       | 0.754222527                             | 0.078894668                               |
| 24.93701381                              | 93.86491585                                       | -0.727139332                            | 0.116299259                               |
| 119.6552913                              | 249.4936829                                       | -0.2132996                              | 0.053083837                               |
| 21.84649325                              | 84.81581211                                       | -0.344374868                            | 0.114144965                               |
| 31.47446978                              | 115.4396782                                       | -0.018914265                            | 0.083548967                               |
| 18.46956171                              | 73.05398941                                       | -0.26468971                             | 0.133156256                               |
| 27.95057529                              | 113.6090641                                       | -0.804103944                            | 0.152419563                               |
| 41.25902874                              | 133.607496                                        | -0.650103608                            | 0.120144785                               |
| 44.26975825                              | 143.354332                                        | -0.436327555                            | 0.083909318                               |
| 24.38182269                              | 100.6143856                                       | -0.493474382                            | 0.12512754                                |
| 20.94519807                              | 78.6987319                                        | -0.606701306                            | 0.15767233                                |
| 49.50048176                              | 151.0643806                                       | 0.201953847                             | 0.069559705                               |
| 36.8552297                               | 199.7020483                                       | 0.155372247                             | 0.093333333                               |
| 60.19048118                              | 155.025795                                        | -0.018210492                            | 0.065862636                               |
| 32.69128004                              | 123.0409641                                       | 0.33508315                              | 0.08273412                                |
| 26.42282065                              | 90.05674645                                       | -1.057135186                            | 0.158384659                               |
| 35.51375877                              | 130.3880905                                       | -0.060844591                            | 0.088605882                               |
| 88.47679828                              | 192.9446373                                       | -0.103268447                            | 0.056492076                               |
| 50.30720632                              | 164.5652542                                       | 0.197711683                             | 0.070954229                               |
| 44.46037219                              | 128.7851133                                       | -0.31097974                             | 0.08195413                                |
| 48.47024975                              | 146.6021271                                       | 0.831523177                             | 0.072533256                               |
| 26.64000227                              | 115.1550903                                       | 0.383138556                             | 0.085617165                               |
| 59.32140837                              | 177.2875214                                       | 0.606824383                             | 0.063578956                               |
| 56.85402622                              | 127.8586006                                       | 0.699841561                             | 0.07486899                                |
| 14.52722681                              | 62.68953784                                       | -1.212174794                            | 0.212095109                               |
| 75.00048062                              | 140.7126792                                       | 0.979708929                             | 0.067706242                               |
| 35.5102603                               | 149.5695381                                       | 0.449143714                             | 0.076523546                               |
| 23.80285996                              | 122.8705521                                       | 0.106048924                             | 0.103305785                               |
| 126.704823                               | 243.6654758                                       | -0.091608638                            | 0.047100769                               |
| 27.43162973                              | 109.967288                                        | -0.538218976                            | 0.126232819                               |
| 18.74163779                              | 103.098114                                        | 0.721485208                             | 0.103534903                               |
| 39.6558781                               | 132.4980335                                       | -0.221000113                            | 0.084327086                               |
| 43.01159243                              | 149.4699249                                       | -0.078726317                            | 0.07858756                                |
| 20.60527532                              | 58.38401687                                       | -1.24132892                             | 0.195492992                               |
| 57.00713213                              | 176.2755966                                       | 0.122534861                             | 0.060957897                               |
| 42.01793209                              | 138.3226891                                       | 0.3800435                               | 0.071313968                               |
| 109.5871866                              | 201.5000935                                       | -0.383248076                            | 0.049789287                               |
| 45.53308597                              | 135.967432                                        | 0.384382464                             | 0.074164512                               |
| 41.01815979                              | 137.735961                                        | 0.178579712                             | 0.080089889                               |
| 29.9850114                               | 107.0883331                                       | 0.543565535                             | 0.095389048                               |
| 46.13289228                              | 129.2754052                                       | -0.182580783                            | 0.093318674                               |
| 20.91883813                              | 81.71492171                                       | -0.511802454                            | 0.126025547                               |
| 21.93429575                              | 100.6521497                                       | -0.251282488                            | 0.113560471                               |
| 31.96786098                              | 124.3428497                                       | -0.054712795                            | 0.091491634                               |
| 43.0730535                               | 124.0546167                                       | 0.080571374                             | 0.078426408                               |
| 58.65468413                              | 174.0705414                                       | -0.135355182                            | 0.061950113                               |
| 53.77171535                              | 163.5209961                                       | -0.169971123                            | 0.078567887                               |
| 40.85061775                              | 150.4872284                                       | 0.226422855                             | 0.07653186                                |
| 33.5168073                               | 120.6965008                                       | -0.15367957                             | 0.088025151                               |
| 34.64030503                              | 123.0664387                                       | -0.141704501                            | 0.085325534                               |
| 32.85604973                              | 110.2649002                                       | 0.682078369                             | 0.08380069                                |
| 27.88606688                              | 106.327482                                        | -0.745516269                            | 0.131373713                               |
| 22.52736478                              | 88.12020442                                       | -0.886974665                            | 0.151876324                               |
| 21.82707381                              | 55.02728605                                       | -0.719579066                            | 0.186906426                               |
| 52.4158353                               | 168.4220047                                       | 0.242981351                             | 0.063926482                               |
| 25.23875296                              | 115.6445503                                       | 0.508585658                             | 0.090104648                               |
| 32.2890117                               | 143.5385399                                       | 0.78918034                              | 0.086455676                               |
| 24.86741156                              | 101.8728943                                       | 0.204451158                             | 0.092639002                               |
| 29.42204382                              | 113.0670223                                       | -0.32980568                             | 0.103361829                               |
| 50.9843168                               | 171.8638763                                       | 0.133676859                             | 0.065357416                               |
| 49.06227955                              | 129.4644165                                       | 0.284825826                             | 0.070832971                               |
| 34.99596862                              | 103.8210485                                       | -0.58922936                             | 0.109490616                               |
| 23.04477169                              | 117.0859051                                       | -0.101814525                            | 0.100936524                               |
| 21.59191765                              | 90.99865508                                       | -0.517268019                            | 0.126027702                               |
| 20.53421039                              | 88.47938347                                       | 0.376197796                             | 0.107734265                               |
| 35.03240524                              | 124.0888214                                       | 0.789664169                             | 0.082094202                               |
| 69.05866174                              | 175.1474762                                       | 0.109624168                             | 0.05875401                                |
| 9.523734443                              | 77.77416039                                       | 0.187376498                             | 0.1312                                    |
| 18.3568909                               | 87.14164734                                       | 0.265121998                             | 0.112426036                               |
| 49.74840114                              | 140.2682939                                       | -0.507297357                            | 0.091334687                               |
| 48.98305453                              | 130.1351967                                       | 1.009875934                             | 0.080786877                               |
| 24.76548605                              | 107.6879139                                       | 0.252879377                             | 0.095356416                               |
| 35.31014148                              | 121.9100885                                       | -0.261114212                            | 0.089237814                               |
| 26.89443437                              | 103.5700204                                       | -0.563497581                            | 0.133349352                               |
| 59.2016987                               | 200.1481285                                       | -0.092322447                            | 0.066263542                               |
| 63.25878254                              | 159.8541851                                       | 0.177274907                             | 0.061613322                               |
| 11.91188756                              | 100.7421741                                       | 0.489158472                             | 0.135416667                               |
| 87.85573362                              | 190.4761591                                       | 0.213915018                             | 0.058301028                               |
| 45.59112664                              | 133.3955412                                       | -0.242351068                            | 0.075535714                               |

| log.sigma.4.5.mm.3D_firstorder_MeanAbsoluteDeviation | log.sigma.4.5.mm.3D_firstorder_Energy | log.sigma.4.5.mm.3D_firstorder_RobustMeanAbsoluteDeviation | log.sigma.4.5.mm.3D_firstorder_Median |
|------------------------------------------------------|---------------------------------------|------------------------------------------------------------|---------------------------------------|
| 93.46502397                                          | 13914372.57                           | 71.51764035                                                | -156.1341553                          |
| 65.47592033                                          | 23418771.39                           | 48.87828875                                                | -92.59667206                          |
| 67.17196761                                          | 6490730.318                           | 46.86908882                                                | -180.9285583                          |
| 84.14785333                                          | 41139659.54                           | 58.56734303                                                | -98.26805115                          |
| 131.5269879                                          | 5928284.99                            | 96.46109318                                                | -204.894928                           |
| 65.9789837                                           | 15880986.36                           | 49.39025344                                                | -245.4742279                          |
| 49.88780692                                          | 794986.531                            | 35.9879131                                                 | -89.40080261                          |
| 97.18970822                                          | 26785233.94                           | 68.466901                                                  | -244.3318481                          |
| 176.1640762                                          | 72285875.8                            | 124.8796376                                                | -82.43948746                          |
| 60.6355215                                           | 33706121.29                           | 42.54586751                                                | -91.28759003                          |
| 72.25198034                                          | 22725878.27                           | 53.50106819                                                | -242.8038025                          |
| 76.68126953                                          | 17029656.58                           | 56.5386449                                                 | -117.8119736                          |
| 65.73410359                                          | 27963957.81                           | 43.36234839                                                | -134.6249237                          |
| 87.28387072                                          | 16805708.4                            | 64.82367901                                                | -156.9751587                          |
| 82.81840916                                          | 7212724.567                           | 59.08619213                                                | -98.91452408                          |
| 35.65971346                                          | 34733836.89                           | 16.65556079                                                | -4.408463955                          |
| 93.36257359                                          | 13213266.11                           | 68.88339922                                                | -209.3232727                          |
| 64.75398482                                          | 41286800.68                           | 44.06810421                                                | -144.6694565                          |
| 125.3263634                                          | 10200735.74                           | 93.1875024                                                 | -184.8371506                          |
| 62.07303372                                          | 25888139.65                           | 47.508158                                                  | -52.42295647                          |
| 49.07923653                                          | 46110445.55                           | 36.40049839                                                | -65.84644318                          |
| 78.43213238                                          | 18730388.13                           | 53.0968386                                                 | -123.0521469                          |
| 52.97290587                                          | 32077906.53                           | 37.4171616                                                 | -73.3385582                           |
| 124.1862731                                          | 3180546.192                           | 96.02092404                                                | -49.33525085                          |
| 50.84988523                                          | 12412552.32                           | 35.69888109                                                | -87.57025528                          |
| 67.29711641                                          | 13631751.25                           | 47.63409718                                                | -193.3098221                          |
| 46.52259195                                          | 15911163.18                           | 31.05815088                                                | -49.23252869                          |
| 59.8797001                                           | 38458382.43                           | 45.53189434                                                | -46.58825684                          |
| 72.31111049                                          | 57073739.88                           | 54.65345748                                                | -68.55875778                          |
| 74.44736672                                          | 37787066.87                           | 56.8306524                                                 | -109.4861069                          |
| 54.82333356                                          | 41091346.37                           | 40.5365249                                                 | -61.34374237                          |
| 49.37852748                                          | 57897247.09                           | 33.25001914                                                | -32.6328125                           |
| 83.05461725                                          | 35338715.24                           | 60.99659687                                                | -130.1218872                          |
| 94.51971049                                          | 268342.5804                           | 71.25220244                                                | -87.17256165                          |
| 93.68056959                                          | 4941734.021                           | 65.77737246                                                | -178.825592                           |
| 70.20632311                                          | 49620504.38                           | 49.99489621                                                | -180.5853729                          |
| 55.56501186                                          | 48165650.66                           | 39.40010773                                                | -20.89940643                          |
| 69.15178056                                          | 33598455.22                           | 52.4207386                                                 | -57.77045441                          |
| 110.3623857                                          | 10310419.29                           | 83.80866433                                                | -110.9095078                          |
| 84.63540538                                          | 21251327.11                           | 65.78247292                                                | -175.9948578                          |
| 72.99154809                                          | 12552992.89                           | 53.05539091                                                | -89.63835144                          |
| 90.61568723                                          | 24243618.75                           | 63.68611567                                                | -258.5002747                          |
| 67.7817501                                           | 41586326.95                           | 48.09549891                                                | -216.7525101                          |
| 99.062296                                            | 23877136.02                           | 73.80200164                                                | -219.2613831                          |
| 80.36047565                                          | 28966486.93                           | 54.02878843                                                | -142.0153198                          |
| 40.88661319                                          | 22975679.57                           | 28.22738731                                                | -12.31879473                          |
| 86.2232224                                           | 46102848.39                           | 58.17097648                                                | -71.14612579                          |
| 79.92652808                                          | 16438817.29                           | 60.06225239                                                | -264.6673584                          |
| 70.8501405                                           | 730145.187                            | 46.17460024                                                | -153.8917236                          |
| 137.1034765                                          | 9498976.866                           | 101.0225688                                                | -189.2757797                          |
| 58.86694577                                          | 39949893.41                           | 44.04851024                                                | -53.47550201                          |
| 61.51369971                                          | 32105539.03                           | 43.6648875                                                 | -288.9583435                          |
| 70.84121282                                          | 56955825.59                           | 52.91123101                                                | -94.30195618                          |
| 78.7903547                                           | 5328109.001                           | 59.20749393                                                | -105.4948044                          |
| 46.58948047                                          | 53731188.84                           | 28.74328771                                                | -9.643909931                          |
| 96.17282955                                          | 21890976.01                           | 71.19757102                                                | -234.3839569                          |
| 80.00253398                                          | 42025862.07                           | 56.72137499                                                | -203.4522095                          |
| 118.7373765                                          | 27413634.76                           | 84.03814725                                                | -177.6731339                          |
| 78.83243761                                          | 13005467.98                           | 55.50030491                                                | -172.1595306                          |
| 73.36364613                                          | 10617356.07                           | 54.69094838                                                | -129.818634                           |
| 62.36692198                                          | 44601569.93                           | 44.00830579                                                | -168.6979218                          |
| 74.80086483                                          | 93748000.32                           | 52.89366521                                                | -53.77398491                          |
| 49.70292858                                          | 18924503.82                           | 34.8033024                                                 | -14.03869295                          |
| 52.35425974                                          | 14160694.35                           | 40.16560186                                                | -60.87981987                          |
| 72.48457788                                          | 3063506.361                           | 51.22496743                                                | -236.4455872                          |
| 73.41860752                                          | 14433799.26                           | 51.40615888                                                | -58.09539795                          |
| 100.3705507                                          | 7556096.381                           | 71.14123174                                                | -229.5894012                          |
| 83.73436891                                          | 64216420.74                           | 65.09957288                                                | -80.61185455                          |
| 84.1856034                                           | 14988963.07                           | 62.08792369                                                | -298.4315796                          |
| 65.22005072                                          | 28183731.48                           | 48.66006263                                                | -96.06662369                          |
| 66.57953419                                          | 44922434.28                           | 48.73024499                                                | -101.6838379                          |
| 69.4891698                                           | 30685778.41                           | 47.0644536                                                 | -220.8276672                          |
| 58.15735026                                          | 56978378.95                           | 44.19366669                                                | -34.97290039                          |
| 52.43287078                                          | 67076431.31                           | 38.18166351                                                | -21.98457146                          |
| 46.29717417                                          | 67448732.25                           | 27.12713344                                                | -3.787131548                          |
| 93.47010342                                          | 28353230.97                           | 69.94078604                                                | -238.9144135                          |
| 66.21042052                                          | 24327310.76                           | 48.64653111                                                | -223.3912354                          |
| 75.69625987                                          | 15574369.95                           | 55.41769703                                                | -260.8605957                          |
| 61.1284042                                           | 43012095.76                           | 42.38675559                                                | -202.5913086                          |
| 61.28162603                                          | 39664046.95                           | 45.75829707                                                | -91.84764481                          |
| 91.3698712                                           | 17937568.25                           | 65.7943397                                                 | -333.4080505                          |
| 80.52712699                                          | 25921145.4                            | 55.08124309                                                | -147.3059998                          |
| 64.09960202                                          | 44456243.47                           | 44.49823845                                                | -29.06420898                          |
| 64.39922765                                          | 500886.2032                           | 49.0849704                                                 | -99.23252869                          |
| 51.63034303                                          | 37125119.87                           | 37.52447625                                                | -47.60418129                          |
| 52.73989526                                          | 30241511.75                           | 37.16021267                                                | -68.20336151                          |
| 74.56329406                                          | 17641712.72                           | 52.05870353                                                | -213.9329834                          |
| 102.4416313                                          | 50289820.17                           | 72.3466574                                                 | -265.3667908                          |
| 46.51253534                                          | 443575.5215                           | 34.62928204                                                | -83.66726303                          |
| 60.18628255                                          | 464703.006                            | 38.16550003                                                | -194.5622864                          |
| 76.1532401                                           | 53942363.36                           | 56.26034735                                                | -68.19133759                          |
| 83.55947973                                          | 18333648.95                           | 56.38879826                                                | -244.2306442                          |
| 59.93075569                                          | 8213018.536                           | 44.11570707                                                | -124.294014                           |
| 65.58559736                                          | 48172353.17                           | 49.04132689                                                | -81.3900032                           |
| 58.77789754                                          | 55895192.42                           | 43.53237829                                                | -29.17677784                          |
| 105.8165329                                          | 4569405.665                           | 75.87741752                                                | -234.1299591                          |
| 92.96504885                                          | 19402739.05                           | 66.63238365                                                | -122.2575378                          |
| 50.8274004                                           | 535933.6086                           | 34.57368625                                                | -177.0458908                          |
| 107.7165024                                          | 4905059.807                           | 79.11398117                                                | -127.8648834                          |
| 76.97087457                                          | 5993612.372                           | 54.05769062                                                | -101.1074295                          |

| log.sigma.4.5.mm.3D_firstorder_TotalEnergy | log.sigma.4.5.mm.3D_firstorder_Maximum | log.sigma.4.5.mm.3D_firstorder_RootMeanSquared | log.sigma.4.5.mm.3D_firstorder_90Percentile | log.sigma.4.5.mm.3D_firstorder_Minimum |
|--------------------------------------------|----------------------------------------|------------------------------------------------|---------------------------------------------|----------------------------------------|
| 375688059.3                                | 99.91651154                            | 196.3261784                                    | -22.24330139                                | -418.102478                            |
| 632306827.6                                | 93.08852386                            | 129.1972346                                    | -9.994631004                                | -341.4086609                           |
| 175249718.6                                | 37.36299133                            | 191.4961952                                    | -57.92788391                                | -346.3130188                           |
| 1110770808                                 | 274.4463196                            | 145.8862697                                    | 26.21725464                                 | -427.1394653                           |
| 160063694.7                                | 191.9396362                            | 242.2723488                                    | 41.4022789                                  | -475.0978699                           |
| 428786631.8                                | -48.11156082                           | 255.1195988                                    | -135.8961334                                | -382.828064                            |
| 21464636.34                                | 77.2417984                             | 106.5689938                                    | -1.793463826                                | -193.0717163                           |
| 723201316.4                                | 200.4273987                            | 258.4494044                                    | -55.48947525                                | -445.1486206                           |
| 1951718647                                 | 482.0431213                            | 221.3010858                                    | 334.7116699                                 | -457.0112915                           |
| 910065274.8                                | 178.57341                              | 120.5602154                                    | -4.830167007                                | -356.5376587                           |
| 613598713.4                                | 33.71975327                            | 245.8478506                                    | -114.4983864                                | -389.6911316                           |
| 459800727.5                                | 224.4212189                            | 149.9874789                                    | 2.247366047                                 | -349.8734436                           |
| 755026860.9                                | 247.5883026                            | 143.0783653                                    | -5.632312775                                | -272.0367737                           |
| 453754126.8                                | 177.0597382                            | 178.4068193                                    | 1.10151124                                  | -354.7620239                           |
| 194743563.3                                | 212.7456665                            | 140.7663929                                    | 35.23173828                                 | -306.4697571                           |
| 937813595.9                                | 249.7086945                            | 56.63726285                                    | 27.07653656                                 | -345.3748779                           |
| 356758184.9                                | 65.44871521                            | 246.7602627                                    | -77.91945038                                | -443.7307739                           |
| 1114743618                                 | 256.9295044                            | 163.1021766                                    | -38.40824509                                | -331.4057007                           |
| 275419864.9                                | 142.0209045                            | 236.7445851                                    | 10.12887268                                 | -461.0812683                           |
| 698979770.6                                | 132.3419037                            | 96.60446351                                    | 22.66162987                                 | -254.7019196                           |
| 1244982030                                 | 184.6776428                            | 95.31947377                                    | -5.024501228                                | -304.581604                            |
| 505720479.6                                | 216.7310791                            | 143.5461163                                    | 26.49460754                                 | -300.7166138                           |
| 866103476.2                                | 162.9280396                            | 104.8121387                                    | -4.227607632                                | -368.8304138                           |
| 85874747.19                                | 229.4969788                            | 154.6411366                                    | 127.6898102                                 | -364.5334473                           |
| 335138912.7                                | 124.3029022                            | 113.7090234                                    | -19.33600292                                | -272.9029846                           |
| 368057283.7                                | 27.03040314                            | 212.4576409                                    | -90.54411087                                | -379.5536194                           |
| 429601406                                  | 236.2323914                            | 83.37350675                                    | 4.739061165                                 | -289.8681335                           |
| 1038376326                                 | 338.3512268                            | 99.36690796                                    | -0.947844279                                | -317.6472473                           |
| 1540990977                                 | 304.6418457                            | 123.9311025                                    | -3.51513052                                 | -402.1465149                           |
| 1020250805                                 | 102.9696274                            | 149.397425                                     | -13.65284786                                | -381.1390686                           |
| 1109466352                                 | 198.664505                             | 98.90058144                                    | -3.491645575                                | -309.7103577                           |
| 1563225671                                 | 329.5792236                            | 80.96080951                                    | 2.7088521                                   | -318.7130737                           |
| 954145311.5                                | 227.1094666                            | 159.5049831                                    | 5.63963995                                  | -353.6054077                           |
| 7245249.671                                | 107.0528259                            | 133.7516555                                    | 56.75726166                                 | -246.1382141                           |
| 133426818.6                                | 116.7860413                            | 209.1223553                                    | -22.72684288                                | -445.5235596                           |
| 1339753618                                 | 123.0218658                            | 192.8646673                                    | -53.80521698                                | -386.3916931                           |
| 1300472568                                 | 201.0185547                            | 84.84440352                                    | 3.74433732                                  | -317.300293                            |
| 907158291.1                                | 233.4073181                            | 105.2676812                                    | 31.11223278                                 | -289.6351013                           |
| 278381320.8                                | 206.7236938                            | 179.2196593                                    | 37.42058563                                 | -401.036377                            |
| 573785832.1                                | 78.5793457                             | 198.9325663                                    | -34.43024979                                | -362.9569092                           |
| 338930807.9                                | 187.3838043                            | 132.5014468                                    | 3.497568989                                 | -396.9916077                           |
| 654577706.3                                | 152.7723999                            | 252.2529391                                    | -66.79589081                                | -458.4635315                           |
| 1122830828                                 | 84.62391663                            | 224.6527173                                    | -91.84295654                                | -416.9357605                           |
| 644682672.6                                | 226.0832214                            | 233.2162762                                    | -27.78211594                                | -415.0516663                           |
| 782095147                                  | 218.1689758                            | 161.1797507                                    | 19.58030128                                 | -345.415863                            |
| 620343348.4                                | 81.36328125                            | 61.26148502                                    | 8.502187252                                 | -228.5860596                           |
| 1244776907                                 | 625.4428711                            | 129.5727311                                    | 70.92420197                                 | -334.1557007                           |
| 443848066.7                                | 3.455482721                            | 268.5145728                                    | -113.1963699                                | -417.504425                            |
| 19713920.05                                | 23.304609513                           | 182.1768854                                    | -62.89942894                                | -311.9936523                           |
| 256472375.4                                | 176.1748352                            | 255.0715299                                    | 33.34464169                                 | -558.473999                            |
| 1078647122                                 | 190.5014343                            | 98.95271872                                    | 0.796547174                                 | -320.4871521                           |
| 866849553.7                                | -9.628904343                           | 282.2522807                                    | -164.9243439                                | -419.6604004                           |
| 1537807291                                 | 235.1953278                            | 133.516102                                     | -4.182876968                                | -368.8493652                           |
| 143858943                                  | 106.2746658                            | 149.3095546                                    | -3.762834644                                | -313.0924377                           |
| 1450742099                                 | 191.1283417                            | 68.93800867                                    | 18.07967949                                 | -293.1324463                           |
| 591056352.2                                | 70.01593018                            | 255.6290223                                    | -73.34444427                                | -483.5791016                           |
| 1134698276                                 | 220.1517334                            | 219.5331318                                    | -64.15796738                                | -463.5080872                           |
| 740168138.6                                | 128.5483093                            | 244.653015                                     | -19.67542706                                | -572.9199219                           |
| 351147635.3                                | 131.795105                             | 191.6731857                                    | -34.7143669                                 | -365.4883118                           |
| 286668613.8                                | 115.695343                             | 150.9437839                                    | 1.932099819                                 | -300.6408386                           |
| 1204242388                                 | 143.1429443                            | 175.0828374                                    | -47.63240891                                | -339.6113586                           |
| 2531196009                                 | 399.2024536                            | 117.6235568                                    | 14.33585072                                 | -420.98526                             |
| 510961603.2                                | 270.3418274                            | 68.1556303                                     | 38.83964539                                 | -223.826828                            |
| 382338747.4                                | 93.38349152                            | 89.14324199                                    | 12.2978322                                  | -239.6513062                           |
| 82714671.75                                | -2.849956989                           | 240.4204792                                    | -113.3185852                                | -409.6981506                           |
| 389712580                                  | 278.5249939                            | 111.9345328                                    | 48.41797981                                 | -303.585907                            |
| 204014602.3                                | 5.894629002                            | 268.2588725                                    | -69.17874985                                | -509.1761169                           |
| 1733843360                                 | 246.3913879                            | 136.09624                                      | 9.985800934                                 | -335.7217102                           |
| 404702002.9                                | -66.40657043                           | 323.755963                                     | -177.903714                                 | -486.6274414                           |
| 760960749.9                                | 141.9700317                            | 125.4094443                                    | 3.28580246                                  | -300.8263855                           |
| 1212905726                                 | 166.972229                             | 131.4705565                                    | -2.324021196                                | -349.2038879                           |
| 828516016.9                                | 124.5066376                            | 232.6360648                                    | -102.2402832                                | -401.8077698                           |
| 1538416232                                 | 182.4583893                            | 89.85556636                                    | 6.684012222                                 | -327.723938                            |
| 1811063645                                 | 141.1316223                            | 78.68474808                                    | 9.664615726                                 | -246.8595886                           |
| 1821115771                                 | 326.1231995                            | 68.15826755                                    | 24.5983593                                  | -297.1706238                           |
| 765537236.2                                | 100.066809                             | 252.1354135                                    | -67.62532806                                | -494.1489563                           |
| 656837390.6                                | 83.10254669                            | 230.9748162                                    | -106.9135208                                | -383.6422424                           |
| 420507988.8                                | 59.37262344                            | 263.6824554                                    | -122.3956032                                | -383.1247864                           |
| 1161326586                                 | 49.28096008                            | 217.0500615                                    | -104.6387787                                | -406.4016418                           |
| 1070929268                                 | 193.1588898                            | 121.1142288                                    | -7.346503019                                | -424.8642578                           |
| 484314342.7                                | -70.75054932                           | 346.9673819                                    | -183.4272919                                | -589.0023193                           |
| 699870925.7                                | 222.564621                             | 173.1087579                                    | -2.756761885                                | -409.1950684                           |
| 1200318574                                 | 304.0594482                            | 94.97011678                                    | 27.94601784                                 | -387.5629272                           |
| 13523927.49                                | 35.90781784                            | 127.1126251                                    | 5.57159853                                  | -267.8118591                           |
| 1002378236                                 | 172.3142853                            | 86.49789772                                    | 6.239788103                                 | -282.8755493                           |
| 816520817.4                                | 203.8784332                            | 92.86110897                                    | 21.51209869                                 | -242.8916321                           |
| 476326243.4                                | 142.4671936                            | 219.8487196                                    | -68.29247742                                | -373.6638489                           |
| 1357825145                                 | 144.2492981                            | 292.2014683                                    | -102.6215164                                | -625.3703613                           |
| 11976539.08                                | 41.02717972                            | 94.18869587                                    | 11.88655558                                 | -210.781723                            |
| 12546981.16                                | -46.15087128                           | 189.0671444                                    | -76.40519867                                | -292.8490906                           |
| 1456443811                                 | 288.6835327                            | 125.424172                                     | 6.458793449                                 | -426.0242004                           |
| 495008521.6                                | 131.9400024                            | 245.5769854                                    | -68.68007813                                | -368.2485046                           |
| 221751500.5                                | 90.70795441                            | 140.5091919                                    | -28.71838379                                | -270.5890503                           |
| 1300653536                                 | 130.1331787                            | 114.8506735                                    | 12.277878                                   | -327.9598694                           |
| 1509170195                                 | 191.4819641                            | 87.97484001                                    | 11.54082708                                 | -279.3304749                           |
| 123373953                                  | 86.75429535                            | 269.3144048                                    | -77.46180573                                | -555.0065308                           |
| 523873954.5                                | 217.9293213                            | 168.9184412                                    | 24.4949501                                  | -394.5665894                           |
| 14470207.43                                | -13.70308304                           | 149.4341562                                    | -40.48087349                                | -224.3265533                           |
| 132436614.8                                | 180.1984406                            | 173.4715869                                    | 69.05305023                                 | -396.3846741                           |
| 161827534                                  | 174.4038544                            | 146.3070691                                    | 2.134265208                                 | -363.3719177                           |

| log.sigma.4.5.mm.3D_firstorder_Entropy | log.sigma.4.5.mm.3D_firstorder_StandardDeviation | log.sigma.4.5.mm.3D_firstorder_Range | log.sigma.4.5.mm.3D_firstorder_Variance | log.sigma.4.5.mm.3D_firstorder_10Percentile |
|----------------------------------------|--------------------------------------------------|--------------------------------------|-----------------------------------------|---------------------------------------------|
| 4.107794988                            | 110.4390893                                      | 518.0189896                          | 12196.79244                             | -312.6051941                                |
| 3.629323377                            | 79.00246219                                      | 434.4971848                          | 6241.389031                             | -213.8390198                                |
| 3.650342929                            | 83.64360214                                      | 383.6760101                          | 6996.252179                             | -272.299585                                 |
| 4.10580132                             | 105.6592295                                      | 701.5857849                          | 11163.87278                             | -237.0642242                                |
| 4.503786608                            | 159.4765694                                      | 667.0375061                          | 25432.77618                             | -385.9450989                                |
| 3.578935745                            | 78.49924958                                      | 334.7165031                          | 6162.132185                             | -343.8731354                                |
| 3.25366577                             | 61.52710931                                      | 270.3135147                          | 3785.585179                             | -159.6894165                                |
| 4.18868611                             | 120.8917738                                      | 645.5760193                          | 14614.82097                             | -375.2689819                                |
| 4.959884006                            | 217.9797143                                      | 939.0544128                          | 47515.15585                             | -291.0081177                                |
| 3.641257664                            | 75.6825414                                       | 535.1110687                          | 5727.847072                             | -193.7854614                                |
| 3.751190654                            | 86.57957802                                      | 423.4108849                          | 7496.02333                              | -331.2505951                                |
| 3.895798853                            | 93.13790435                                      | 574.2946625                          | 8674.669227                             | -236.3055511                                |
| 3.656547677                            | 85.1073032                                       | 519.6250763                          | 7243.253059                             | -207.7046814                                |
| 4.023371785                            | 104.9291626                                      | 531.8217621                          | 11010.12917                             | -270.845166                                 |
| 4.022479514                            | 101.9341879                                      | 519.2154236                          | 10390.57867                             | -227.9901413                                |
| 2.725135428                            | 53.58607956                                      | 595.0835724                          | 2871.467922                             | -88.16307831                                |
| 4.103196737                            | 112.3968992                                      | 509.1794891                          | 12633.06295                             | -371.4249329                                |
| 3.740422332                            | 83.01003402                                      | 588.3352051                          | 6890.665748                             | -247.8861313                                |
| 4.442893245                            | 149.0436832                                      | 603.1021729                          | 22214.01951                             | -384.0826935                                |
| 3.500377492                            | 73.02211156                                      | 387.0438232                          | 5332.228777                             | -167.9138977                                |
| 3.166828139                            | 59.87502209                                      | 489.2592468                          | 3585.01827                              | -158.0764832                                |
| 3.918714058                            | 99.06874288                                      | 517.4476929                          | 9814.615815                             | -209.7121216                                |
| 3.37017742                             | 67.18171491                                      | 531.7584534                          | 4513.382818                             | -163.2854431                                |
| 4.342856241                            | 144.4870783                                      | 594.030426                           | 20876.51579                             | -255.994043                                 |
| 3.39224187                             | 63.65091808                                      | 397.2058868                          | 4051.439373                             | -183.0501785                                |
| 3.750170876                            | 82.90759919                                      | 406.5840225                          | 6873.670003                             | -308.75466                                  |
| 3.249697768                            | 60.29357072                                      | 526.1005249                          | 3635.31467                              | -134.1044495                                |
| 3.186583299                            | 71.62508804                                      | 655.9984741                          | 5130.153236                             | -170.4320892                                |
| 3.531159232                            | 86.8779828                                       | 706.7883606                          | 7547.783896                             | -214.718811                                 |
| 3.737918398                            | 88.41415709                                      | 484.108696                           | 7817.063173                             | -246.7962585                                |
| 3.111668546                            | 66.65662179                                      | 508.3748627                          | 4443.105229                             | -164.5636749                                |
| 3.167565336                            | 63.72153598                                      | 648.2922974                          | 4060.434148                             | -141.5595612                                |
| 4.017348375                            | 100.5613494                                      | 580.7148743                          | 10112.585                               | -251.1880432                                |
| 3.506890596                            | 108.31808                                        | 353.19104                            | 11732.80646                             | -201.816864                                 |
| 4.115959571                            | 115.3770705                                      | 562.3096008                          | 13311.86841                             | -335.5769653                                |
| 3.809347742                            | 86.87153996                                      | 509.413559                           | 7546.664455                             | -272.0264374                                |
| 3.126817458                            | 68.15680862                                      | 518.3188477                          | 4645.350561                             | -156.7827606                                |
| 3.688329931                            | 82.01099095                                      | 523.0424194                          | 6725.802637                             | -178.922908                                 |
| 4.313580941                            | 130.8577641                                      | 607.7600708                          | 17123.75442                             | -306.2909241                                |
| 3.924582273                            | 99.58042251                                      | 441.5362549                          | 9916.260547                             | -299.5544006                                |
| 3.817919646                            | 89.4900813                                       | 584.375412                           | 8008.47465                              | -218.3142944                                |
| 4.037123858                            | 112.0018515                                      | 611.2359314                          | 12544.41474                             | -345.5058594                                |
| 3.746110574                            | 83.59565202                                      | 501.5596771                          | 6988.233036                             | -313.12146                                  |
| 4.163748692                            | 119.52561                                        | 641.1348877                          | 14286.37146                             | -337.5894531                                |
| 3.994001043                            | 102.549314                                       | 563.5848389                          | 10516.3618                              | -246.2160675                                |
| 2.655114379                            | 50.36671158                                      | 309.9493408                          | 2536.805635                             | -117.3661476                                |
| 4.141634821                            | 113.3274164                                      | 599.5985718                          | 12843.10332                             | -195.6604004                                |
| 3.852089263                            | 95.5642419                                       | 420.9599078                          | 9132.524329                             | -366.7377411                                |
| 3.42511855                             | 86.45479205                                      | 335.2983475                          | 7474.431069                             | -259.6147156                                |
| 4.568910306                            | 165.0801822                                      | 734.6488342                          | 27251.46655                             | -440.2695007                                |
| 3.36088308                             | 70.84926517                                      | 510.9885864                          | 5019.618375                             | -168.8766861                                |
| 3.512192936                            | 75.51400029                                      | 410.031496                           | 5702.364239                             | -353.5258484                                |
| 3.7604071                              | 85.43781276                                      | 604.044693                           | 7299.61985                              | -220.2264587                                |
| 3.848691536                            | 93.55057953                                      | 419.3671036                          | 8751.71093                              | -244.1753113                                |
| 2.914951139                            | 60.34284966                                      | 484.260788                           | 3641.259505                             | -132.37854                                  |
| 4.191313611                            | 115.677503                                       | 553.5950317                          | 13381.2847                              | -371.802124                                 |
| 4.002684943                            | 99.33211507                                      | 683.6598206                          | 9866.869083                             | -319.594101                                 |
| 4.515723554                            | 146.8839272                                      | 701.4682312                          | 21574.88807                             | -405.063089                                 |
| 3.939961881                            | 97.76346175                                      | 497.2834167                          | 9557.694453                             | -293.1778992                                |
| 3.794493349                            | 88.05227782                                      | 416.3361816                          | 7753.20363                              | -233.3286057                                |
| 3.616488409                            | 77.65528118                                      | 482.754303                           | 6030.342694                             | -246.3921326                                |
| 3.804125904                            | 93.79971259                                      | 820.1877136                          | 8798.386082                             | -202.1295242                                |
| 3.260603928                            | 61.75271004                                      | 494.1686554                          | 3813.397198                             | -121.8748604                                |
| 3.286122238                            | 61.75050958                                      | 333.0347977                          | 3813.125433                             | -147.2819489                                |
| 3.626821465                            | 88.3663348                                       | 406.8481936                          | 7808.609127                             | -348.5412842                                |
| 3.895750123                            | 92.00491034                                      | 582.1109009                          | 8464.903526                             | -186.4789337                                |
| 4.154822514                            | 122.302011                                       | 515.0707459                          | 14957.7819                              | -423.8944275                                |
| 3.881266126                            | 98.22674992                                      | 582.1130981                          | 9648.4944                               | -234.1078857                                |
| 3.873031386                            | 101.2204034                                      | 420.220871                           | 10245.57006                             | -442.4209656                                |
| 3.650117111                            | 78.38301926                                      | 442.7964172                          | 6143.897709                             | -205.6081863                                |
| 3.730499646                            | 81.50170685                                      | 516.1761169                          | 6642.52822                              | -212.4667847                                |
| 3.8172713                              | 89.1738594                                       | 526.3144073                          | 7951.977201                             | -322.0204529                                |
| 3.255186438                            | 68.89093633                                      | 510.1823273                          | 4745.961109                             | -164.3688354                                |
| 3.097942297                            | 62.84858483                                      | 387.9912109                          | 3949.944615                             | -146.8723465                                |
| 3.028585181                            | 63.6051985                                       | 623.2938232                          | 4045.621276                             | -120.367511                                 |
| 4.138964056                            | 111.9015658                                      | 594.2156372                          | 12521.96042                             | -357.6109314                                |
| 3.658564642                            | 80.73517885                                      | 466.7447891                          | 6518.169104                             | -313.084549                                 |
| 3.727086375                            | 92.266022                                        | 442.4974098                          | 8513.018816                             | -351.1931122                                |
| 3.659930298                            | 76.96509697                                      | 455.6826019                          | 5923.626151                             | -303.2135193                                |
| 3.514269551                            | 74.93730395                                      | 618.0231476                          | 5615.599523                             | -194.2685577                                |
| 4.126505855                            | 112.0973332                                      | 518.25177                            | 12565.81212                             | -469.3117249                                |
| 4.056011822                            | 101.9118985                                      | 631.7596893                          | 10386.03506                             | -265.4069092                                |
| 3.569999551                            | 80.45344953                                      | 691.6223755                          | 6472.757541                             | -168.6758911                                |
| 3.474380085                            | 76.82300258                                      | 303.719677                           | 5901.737726                             | -196.6130066                                |
| 3.275271691                            | 63.10070012                                      | 455.1898346                          | 3981.698355                             | -150.1445572                                |
| 3.434115395                            | 65.90988579                                      | 446.7700653                          | 4344.113044                             | -147.0038788                                |
| 3.802533911                            | 93.19581307                                      | 516.1310425                          | 8685.459574                             | -303.8518799                                |
| 4.33649217                             | 127.2074717                                      | 769.6196594                          | 16181.74085                             | -415.0408264                                |
| 3.081218383                            | 55.69555299                                      | 251.8089027                          | 3101.994623                             | -141.0505905                                |
| 3.238901257                            | 70.70144968                                      | 246.6982193                          | 4998.694987                             | -253.7620575                                |
| 3.772441521                            | 92.9157243                                       | 714.7077332                          | 8633.331823                             | -212.3625244                                |
| 3.855592116                            | 105.9298651                                      | 500.1885071                          | 11221.13632                             | -335.9537323                                |
| 3.536614243                            | 72.39999753                                      | 361.2970047                          | 5241.759642                             | -211.8210754                                |
| 3.651504533                            | 78.50579431                                      | 458.0930481                          | 6163.15974                              | -190.5394104                                |
| 3.323115585                            | 70.12227272                                      | 470.812439                           | 4917.133132                             | -159.3242081                                |
| 4.064936084                            | 129.5243855                                      | 641.7608261                          | 16776.56644                             | -390.4576721                                |
| 4.208567164                            | 115.0732999                                      | 612.4959106                          | 13241.86436                             | -276.2154205                                |
| 2.938721876                            | 62.32010063                                      | 210.6234703                          | 3883.794943                             | -209.5520477                                |
| 4.278198267                            | 130.4287058                                      | 576.5831146                          | 17011.64729                             | -282.6748169                                |
| 3.930366826                            | 96.62483411                                      | 537.7757721                          | 9336.358566                             | -248.8246048                                |

| log.sigma.4.5.mm.3D_firstorder_Kurtosis | log.sigma.4.5.mm.3D_firstorder_Mean | log.sigma.4.5.mm.3D_glrIm_ShortRunLowGrayLevelEmphasis | log.sigma.4.5.mm.3D_glrIm_GrayLevelVariance |
|-----------------------------------------|-------------------------------------|--------------------------------------------------------|---------------------------------------------|
| 2.155724381                             | -162.3181317                        | 0.021848811                                            | 19.71685353                                 |
| 2.586870164                             | -102.2278651                        | 0.017698182                                            | 10.01809263                                 |
| 2.674610865                             | -172.2629983                        | 0.041672472                                            | 11.17489447                                 |
| 3.176842419                             | -100.592897                         | 0.006776497                                            | 18.74373492                                 |
| 2.389291163                             | -182.3817831                        | 0.024585502                                            | 40.81118389                                 |
| 2.22254837                              | -242.7424098                        | 0.050360295                                            | 9.738206103                                 |
| 3.022715333                             | -87.0135924                         | 0.101205657                                            | 6.473856445                                 |
| 3.079649155                             | -228.432208                         | 0.041178192                                            | 23.78517437                                 |
| 2.516457018                             | -38.19705151                        | 0.008644422                                            | 74.38117233                                 |
| 3.089661135                             | -93.84518351                        | 0.00922985                                             | 9.870416938                                 |
| 2.660369474                             | -230.0981145                        | 0.04990679                                             | 12.37872666                                 |
| 2.795659082                             | -117.565193                         | 0.022761002                                            | 14.32092609                                 |
| 4.372230964                             | -115.0137624                        | 0.045853005                                            | 12.38217241                                 |
| 2.513299973                             | -144.2874354                        | 0.020372001                                            | 17.75420725                                 |
| 2.821700158                             | -97.08037246                        | 0.023993272                                            | 16.90473411                                 |
| 7.970388196                             | -18.33880095                        | 0.005920093                                            | 7.277177345                                 |
| 2.361224078                             | -219.6760439                        | 0.039642451                                            | 20.20680245                                 |
| 3.788675323                             | -140.398199                         | 0.020330639                                            | 11.63599374                                 |
| 2.209949921                             | -183.9401507                        | 0.039664599                                            | 35.51254912                                 |
| 2.181407786                             | -63.24708366                        | 0.019377948                                            | 8.52176079                                  |
| 3.028632804                             | -74.16726913                        | 0.011086978                                            | 5.821165458                                 |
| 3.393581106                             | -103.8791205                        | 0.020382732                                            | 16.42590701                                 |
| 3.980330481                             | -80.44999446                        | 0.009073703                                            | 7.659112324                                 |
| 2.025268457                             | -55.11229763                        | 0.033394548                                            | 32.97900285                                 |
| 3.009863155                             | -94.22474532                        | 0.034133938                                            | 6.802507448                                 |
| 2.528658878                             | -195.613341                         | 0.032532826                                            | 11.33833337                                 |
| 4.211553966                             | -57.58321767                        | 0.012979738                                            | 6.655898455                                 |
| 3.339762133                             | -68.87400932                        | 0.015668317                                            | 8.605044109                                 |
| 3.067523061                             | -88.38062154                        | 0.00749459                                             | 12.44506403                                 |
| 2.346352554                             | -120.4264399                        | 0.012228702                                            | 12.30491117                                 |
| 3.074042736                             | -73.06312189                        | 0.012073071                                            | 7.433002263                                 |
| 4.493030038                             | -49.94215183                        | 0.010401989                                            | 8.024983604                                 |
| 2.679666301                             | -123.8113671                        | 0.017241347                                            | 16.44711268                                 |
| 1.70843714                              | -78.4646347                         | 0.113068888                                            | 18.4187162                                  |
| 2.541139712                             | -174.4141367                        | 0.025015611                                            | 21.3753764                                  |
| 2.908143962                             | -172.1920888                        | 0.019838311                                            | 12.39857414                                 |
| 3.5493149                               | -50.52941962                        | 0.010825011                                            | 8.399741576                                 |
| 2.38873292                              | -65.99607615                        | 0.015851165                                            | 11.2823273                                  |
| 2.261913277                             | -122.4578778                        | 0.018152844                                            | 27.17916572                                 |
| 2.037925649                             | -172.2147073                        | 0.036255126                                            | 15.99962014                                 |
| 2.982436477                             | -97.71468035                        | 0.010818999                                            | 13.08735339                                 |
| 3.319479622                             | -226.0246237                        | 0.016729355                                            | 20.88191112                                 |
| 2.819662843                             | -208.5200478                        | 0.019316409                                            | 11.66521308                                 |
| 2.852732891                             | -200.258483                         | 0.032430678                                            | 23.02692643                                 |
| 3.4024663                               | -124.3485032                        | 0.023844122                                            | 17.24200193                                 |
| 3.573424904                             | -34.87354172                        | 0.015380646                                            | 4.757772843                                 |
| 5.900151284                             | -62.81711013                        | 0.011460124                                            | 21.35532453                                 |
| 2.333276996                             | -250.9333607                        | 0.051235889                                            | 14.72622678                                 |
| 2.432497654                             | -160.3558122                        | 0.113362028                                            | 11.84794274                                 |
| 2.233402602                             | -194.4479849                        | 0.017553583                                            | 43.56939674                                 |
| 2.964986701                             | -69.0798246                         | 0.013588756                                            | 8.594369577                                 |
| 3.184118787                             | -271.9632065                        | 0.045495462                                            | 9.544744375                                 |
| 2.686519436                             | -102.6008267                        | 0.01283578                                             | 11.87185391                                 |
| 2.294297791                             | -116.3685188                        | 0.039954323                                            | 13.96803235                                 |
| 4.138343931                             | -33.33450968                        | 0.010424431                                            | 7.515516617                                 |
| 2.353201843                             | -227.9581373                        | 0.018762503                                            | 21.47837536                                 |
| 3.078087162                             | -195.7751947                        | 0.011579865                                            | 16.07783631                                 |
| 2.652476024                             | -195.6532895                        | 0.017744352                                            | 34.38097653                                 |
| 2.855327038                             | -164.8663569                        | 0.03864005                                             | 15.49750005                                 |
| 2.275134488                             | -122.6002539                        | 0.028577198                                            | 12.5662126                                  |
| 3.116837512                             | -156.9192699                        | 0.025635426                                            | 9.614333205                                 |
| 3.805206512                             | -70.97122676                        | 0.006506368                                            | 15.74209472                                 |
| 3.053301065                             | -28.84081732                        | 0.024117276                                            | 6.853558427                                 |
| 2.231087412                             | -64.29146257                        | 0.02646848                                             | 6.109342533                                 |
| 2.550275721                             | -223.592034                         | 0.04806655                                             | 12.51823826                                 |
| 3.052108573                             | -63.75293019                        | 0.016871892                                            | 13.77720801                                 |
| 2.370278655                             | -238.7572842                        | 0.031282109                                            | 23.82923646                                 |
| 2.315929403                             | -94.20027675                        | 0.017868716                                            | 15.59588006                                 |
| 2.428043494                             | -307.5261834                        | 0.046598709                                            | 16.04311174                                 |
| 2.414040671                             | -97.89602146                        | 0.017568135                                            | 9.833103199                                 |
| 2.645622134                             | -103.159968                         | 0.016033992                                            | 10.81555787                                 |
| 3.615494606                             | -214.8663804                        | 0.022279012                                            | 13.38005436                                 |
| 2.750154657                             | -57.68935515                        | 0.008210904                                            | 7.998547059                                 |
| 2.844603047                             | -47.34284492                        | 0.027240775                                            | 7.056607875                                 |
| 5.413165836                             | -24.49343093                        | 0.010477522                                            | 8.96919151                                  |
| 2.471102851                             | -225.9431485                        | 0.018072668                                            | 20.24428318                                 |
| 2.837374863                             | -216.4051677                        | 0.029541183                                            | 10.74109591                                 |
| 3.239809792                             | -247.0129925                        | 0.065913795                                            | 14.18656423                                 |
| 3.013148927                             | -202.9460595                        | 0.019919414                                            | 10.05870006                                 |
| 3.196669743                             | -95.14755326                        | 0.007200501                                            | 9.045242799                                 |
| 2.458841912                             | -328.3603995                        | 0.022543838                                            | 20.25268661                                 |
| 3.0901337                               | -139.9307222                        | 0.012521906                                            | 17.19560346                                 |
| 3.779409383                             | -50.46350702                        | 0.006279861                                            | 11.5227009                                  |
| 2.221380201                             | -101.2711496                        | 0.064276485                                            | 9.90809534                                  |
| 3.027472121                             | -59.16238631                        | 0.0126725                                              | 6.888026943                                 |
| 3.167934339                             | -65.41462003                        | 0.022957925                                            | 7.476699295                                 |
| 3.523487216                             | -199.1180553                        | 0.046537351                                            | 14.26912074                                 |
| 2.962154703                             | -263.0588475                        | 0.007976632                                            | 26.27314874                                 |
| 2.474954788                             | -75.95732885                        | 0.050734907                                            | 5.33442069                                  |
| 2.138758663                             | -175.3501927                        | 0.132303076                                            | 9.060188609                                 |
| 3.198523054                             | -84.24898272                        | 0.006106643                                            | 14.38993867                                 |
| 3.499759042                             | -221.5556802                        | 0.089805653                                            | 18.44986629                                 |
| 2.567579871                             | -120.4204027                        | 0.055309373                                            | 8.562215368                                 |
| 2.431962804                             | -83.8302897                         | 0.011284911                                            | 9.898273447                                 |
| 2.668486392                             | -53.12663497                        | 0.013389391                                            | 9.014389985                                 |
| 2.569620559                             | -236.1221765                        | 0.024378871                                            | 27.26069686                                 |
| 2.66358995                              | -123.6591098                        | 0.017317308                                            | 21.69829544                                 |
| 2.24414398                              | -135.8188944                        | 0.208725285                                            | 6.132681025                                 |
| 2.29244402                              | -114.371081                         | 0.026320729                                            | 27.41149538                                 |
| 2.80188307                              | -109.8608206                        | 0.022271085                                            | 15.55646465                                 |

| log.sigma.4.5.mm.3D_glrIm_LowGrayLevelRunEmphasis | log.sigma.4.5.mm.3D_glrIm_GrayLevelNonUniformityNormalized | log.sigma.4.5.mm.3D_glrIm_RunVariance | log.sigma.4.5.mm.3D_glrIm_GrayLevelNonUniformity |
|---------------------------------------------------|------------------------------------------------------------|---------------------------------------|--------------------------------------------------|
| 0.023283724                                       | 0.062581349                                                | 0.109970264                           | 20.59398744                                      |
| 0.019724911                                       | 0.08887235                                                 | 0.410777719                           | 100.5788207                                      |
| 0.046670929                                       | 0.091007809                                                | 0.099036756                           | 14.78564876                                      |
| 0.007385241                                       | 0.066631505                                                | 0.201581129                           | 112.7393791                                      |
| 0.02512838                                        | 0.050308816                                                | 0.03863793                            | 4.886056565                                      |
| 0.057163315                                       | 0.091231306                                                | 0.129193609                           | 20.08087104                                      |
| 0.109684676                                       | 0.116987121                                                | 0.078677818                           | 7.578028256                                      |
| 0.04464016                                        | 0.060918693                                                | 0.084902353                           | 22.65890947                                      |
| 0.009210634                                       | 0.036805275                                                | 0.0888378                             | 50.39942298                                      |
| 0.010484256                                       | 0.090537594                                                | 0.364211548                           | 170.0063026                                      |
| 0.055455802                                       | 0.081402462                                                | 0.131339322                           | 27.61452916                                      |
| 0.024989759                                       | 0.073850873                                                | 0.172800505                           | 49.17749208                                      |
| 0.051794061                                       | 0.092519745                                                | 0.229117543                           | 108.4187087                                      |
| 0.022611136                                       | 0.067324173                                                | 0.132420632                           | 32.04279925                                      |
| 0.026479476                                       | 0.069395115                                                | 0.093014028                           | 23.26927468                                      |
| 0.007813196                                       | 0.142330348                                                | 3.857588414                           | 775.2932176                                      |
| 0.0424701                                         | 0.065633955                                                | 0.05702935                            | 13.46837287                                      |
| 0.02327766                                        | 0.086378426                                                | 0.23501676                            | 114.3516027                                      |
| 0.04351232                                        | 0.051030459                                                | 0.051204586                           | 8.843390202                                      |
| 0.022523851                                       | 0.094612009                                                | 0.694373887                           | 197.8855704                                      |
| 0.013183035                                       | 0.120085865                                                | 1.269803119                           | 415.6664448                                      |
| 0.023035416                                       | 0.075740472                                                | 0.207035811                           | 60.18769613                                      |
| 0.010536871                                       | 0.11108224                                                 | 0.717100341                           | 239.7601859                                      |
| 0.035335995                                       | 0.053206177                                                | 0.049311853                           | 6.761454783                                      |
| 0.038954257                                       | 0.111618584                                                | 0.355117347                           | 86.75772909                                      |
| 0.035201959                                       | 0.083222902                                                | 0.104355512                           | 22.97340277                                      |
| 0.01520773                                        | 0.119180471                                                | 0.654847817                           | 204.1509122                                      |
| 0.018345814                                       | 0.103053449                                                | 1.674140028                           | 259.4661918                                      |
| 0.008506311                                       | 0.087099695                                                | 1.138616271                           | 233.9611602                                      |
| 0.013629071                                       | 0.079922531                                                | 0.521911723                           | 106.7183296                                      |
| 0.01426415                                        | 0.107784479                                                | 1.178712406                           | 314.9998528                                      |
| 0.012652402                                       | 0.112163232                                                | 1.981969617                           | 626.1057253                                      |
| 0.019016303                                       | 0.069069896                                                | 0.20043033                            | 84.1427287                                       |
| 0.113639481                                       | 0.092987964                                                | 0.015306122                           | 1.373626374                                      |
| 0.025771371                                       | 0.065375848                                                | 0.046996521                           | 7.060559692                                      |
| 0.021790945                                       | 0.081095713                                                | 0.160057451                           | 95.54050204                                      |
| 0.012997934                                       | 0.111404818                                                | 1.898937929                           | 463.721943                                       |
| 0.018277946                                       | 0.08287079                                                 | 0.56822082                            | 194.6565418                                      |
| 0.019301771                                       | 0.056607044                                                | 0.089129607                           | 16.90328358                                      |
| 0.039959787                                       | 0.070326979                                                | 0.144574555                           | 33.85013439                                      |
| 0.011736608                                       | 0.080707268                                                | 0.220037941                           | 49.74856826                                      |
| 0.018271317                                       | 0.06952526                                                 | 0.120599115                           | 24.07210224                                      |
| 0.021118739                                       | 0.08303128                                                 | 0.154518881                           | 61.13070437                                      |
| 0.035088454                                       | 0.061825464                                                | 0.111512198                           | 24.88404145                                      |
| 0.02615419                                        | 0.072669361                                                | 0.158520716                           | 72.00637698                                      |
| 0.01986945                                        | 0.151455278                                                | 2.693924566                           | 503.8591371                                      |
| 0.012529294                                       | 0.066693382                                                | 0.148403379                           | 163.941848                                       |
| 0.057198979                                       | 0.075166952                                                | 0.11178388                            | 15.67222163                                      |
| 0.11799354                                        | 0.102784332                                                | 0.028440498                           | 2.191566767                                      |
| 0.017931354                                       | 0.047059387                                                | 0.03464953                            | 6.631573376                                      |
| 0.015772375                                       | 0.098928238                                                | 1.280196461                           | 279.5979931                                      |
| 0.051163154                                       | 0.097250293                                                | 0.16093473                            | 34.60857918                                      |
| 0.014172289                                       | 0.081871027                                                | 0.350410476                           | 216.9312216                                      |
| 0.044205268                                       | 0.078270265                                                | 0.111480051                           | 16.93251064                                      |
| 0.012929671                                       | 0.122421581                                                | 3.055822376                           | 786.0141465                                      |
| 0.019878186                                       | 0.060920057                                                | 0.076487941                           | 19.18067843                                      |
| 0.012329964                                       | 0.070808636                                                | 0.089267267                           | 57.44223886                                      |
| 0.018574216                                       | 0.049777704                                                | 0.058324011                           | 21.68728914                                      |
| 0.042672697                                       | 0.073762286                                                | 0.113975874                           | 23.69664194                                      |
| 0.031890027                                       | 0.079326325                                                | 0.194276068                           | 32.43157418                                      |
| 0.028399184                                       | 0.094663385                                                | 0.213159951                           | 118.4742427                                      |
| 0.007429248                                       | 0.077798442                                                | 0.947974356                           | 391.3489486                                      |
| 0.028579574                                       | 0.110779993                                                | 0.95575239                            | 322.4064133                                      |
| 0.030258501                                       | 0.111194789                                                | 0.589726367                           | 153.1580949                                      |
| 0.049259442                                       | 0.091335737                                                | 0.042172253                           | 4.649523369                                      |
| 0.018585825                                       | 0.077873464                                                | 0.171013254                           | 79.40831836                                      |
| 0.032574858                                       | 0.061408989                                                | 0.042246834                           | 6.183402297                                      |
| 0.020038944                                       | 0.072389183                                                | 0.582837037                           | 198.4942433                                      |
| 0.051244499                                       | 0.07642259                                                 | 0.061458925                           | 10.25126363                                      |
| 0.019786512                                       | 0.087772034                                                | 0.354815624                           | 129.4691065                                      |
| 0.017865509                                       | 0.084624272                                                | 0.32096061                            | 183.2157788                                      |
| 0.024713091                                       | 0.082063205                                                | 0.138211308                           | 41.48987181                                      |
| 0.009855785                                       | 0.104481087                                                | 1.524814756                           | 486.3623397                                      |
| 0.03240598                                        | 0.108559455                                                | 2.384143837                           | 699.4244449                                      |
| 0.012901714                                       | 0.117656651                                                | 3.010778973                           | 974.6924988                                      |
| 0.019147877                                       | 0.063262979                                                | 0.09416312                            | 26.21403957                                      |
| 0.032530466                                       | 0.087556609                                                | 0.157943448                           | 35.8494107                                       |
| 0.072765082                                       | 0.083519051                                                | 0.116613243                           | 17.12074759                                      |
| 0.021639515                                       | 0.090638493                                                | 0.17189162                            | 72.71615742                                      |
| 0.008141433                                       | 0.096251737                                                | 0.795521168                           | 196.4416811                                      |
| 0.023101792                                       | 0.064797863                                                | 0.050143351                           | 9.212310834                                      |
| 0.013461448                                       | 0.069645669                                                | 0.136352477                           | 54.29344869                                      |
| 0.007186952                                       | 0.09188718                                                 | 0.935337719                           | 334.6952653                                      |
| 0.065099586                                       | 0.099914293                                                | 0.037066122                           | 2.982311645                                      |
| 0.014936214                                       | 0.110678932                                                | 1.066587866                           | 388.6217131                                      |
| 0.026439681                                       | 0.104286195                                                | 0.372367039                           | 299.5199469                                      |
| 0.051619083                                       | 0.080310526                                                | 0.122658599                           | 26.51337296                                      |
| 0.008297555                                       | 0.057826905                                                | 0.076587946                           | 31.97682772                                      |
| 0.052805354                                       | 0.12847667                                                 | 0.070426686                           | 5.990988306                                      |
| 0.134039187                                       | 0.112097304                                                | 0.019097222                           | 1.429487179                                      |
| 0.006837508                                       | 0.079684579                                                | 0.735210866                           | 209.3477247                                      |
| 0.102763768                                       | 0.078723777                                                | 0.130280128                           | 21.7090139                                       |
| 0.062645627                                       | 0.095000357                                                | 0.168553006                           | 34.78769117                                      |
| 0.012911239                                       | 0.087726981                                                | 0.605240914                           | 245.6380386                                      |
| 0.015978005                                       | 0.094837569                                                | 1.747574403                           | 441.3946858                                      |
| 0.024621796                                       | 0.066604424                                                | 0.03424191                            | 4.062922222                                      |
| 0.018724408                                       | 0.061157946                                                | 0.106071113                           | 38.07394653                                      |
| 0.226662294                                       | 0.135545283                                                | 0.053228953                           | 3.076317885                                      |
| 0.027445084                                       | 0.057625824                                                | 0.058347068                           | 8.862155192                                      |
| 0.023305559                                       | 0.073487937                                                | 0.127546051                           | 18.59184067                                      |

|                                           |                                                         |                                                  |                                            |
|-------------------------------------------|---------------------------------------------------------|--------------------------------------------------|--------------------------------------------|
| log.sigma.4.5.mm.3D_glrIm_LongRunEmphasis | log.sigma.4.5.mm.3D_glrIm_ShortRunHighGrayLevelEmphasis | log.sigma.4.5.mm.3D_glrIm_RunLengthNonUniformity | log.sigma.4.5.mm.3D_glrIm_ShortRunEmphasis |
| 1.316796242                               | 131.9574332                                             | 276.4801025                                      | 0.932646615                                |
| 1.962289882                               | 96.79705376                                             | 804.0959347                                      | 0.86580616                                 |
| 1.291578264                               | 69.03237788                                             | 138.1591016                                      | 0.936607842                                |
| 1.513685005                               | 210.9998222                                             | 1345.015109                                      | 0.910526149                                |
| 1.123896922                               | 212.4540935                                             | 89.72700811                                      | 0.96902577                                 |
| 1.361687812                               | 56.27360616                                             | 182.4764811                                      | 0.926989482                                |
| 1.255117445                               | 31.67964163                                             | 55.66978335                                      | 0.93909541                                 |
| 1.248779478                               | 111.6709788                                             | 322.3189529                                      | 0.944991601                                |
| 1.251885174                               | 372.0059739                                             | 1189.002876                                      | 0.945910239                                |
| 1.898830352                               | 127.3670065                                             | 1324.34354                                       | 0.863646262                                |
| 1.366055904                               | 66.02113541                                             | 281.4170947                                      | 0.926735457                                |
| 1.476521193                               | 102.7114507                                             | 528.6153066                                      | 0.908499064                                |
| 1.595450882                               | 58.45580931                                             | 894.8607626                                      | 0.895321777                                |
| 1.36547907                                | 111.1880752                                             | 393.6120658                                      | 0.926780384                                |
| 1.274788724                               | 108.5727685                                             | 286.8181548                                      | 0.939420343                                |
| 8.022043092                               | 120.7209252                                             | 2330.885075                                      | 0.67504451                                 |
| 1.178816227                               | 114.4483506                                             | 183.8678418                                      | 0.956874071                                |
| 1.616022065                               | 85.19333601                                             | 1003.207091                                      | 0.892258329                                |
| 1.156045924                               | 180.9983282                                             | 157.5051766                                      | 0.963023912                                |
| 2.49182889                                | 67.79546174                                             | 1375.545525                                      | 0.833584648                                |
| 3.460719122                               | 81.97898539                                             | 2058.685387                                      | 0.796078762                                |
| 1.529375135                               | 100.5745943                                             | 630.2007766                                      | 0.90835715                                 |
| 2.586418279                               | 120.5383561                                             | 1362.59074                                       | 0.81834106                                 |
| 1.146421371                               | 202.2454073                                             | 116.4278982                                      | 0.966146778                                |
| 1.901529488                               | 56.23273693                                             | 545.9280117                                      | 0.860221999                                |
| 1.305374568                               | 83.5487825                                              | 232.9860967                                      | 0.933976299                                |
| 2.468224585                               | 89.51313025                                             | 1095.856563                                      | 0.82494042                                 |
| 4.141130733                               | 79.02303555                                             | 1430.823823                                      | 0.778321292                                |
| 3.106722899                               | 151.9115463                                             | 1762.989676                                      | 0.833072326                                |
| 2.139908909                               | 116.6827088                                             | 937.4310499                                      | 0.861248291                                |
| 3.285830055                               | 86.42238785                                             | 1784.364763                                      | 0.806294267                                |
| 4.549135329                               | 98.83626016                                             | 3125.415331                                      | 0.774012238                                |
| 1.505364673                               | 117.5342485                                             | 974.1730445                                      | 0.912853734                                |
| 1.049450549                               | 71.38003663                                             | 14.34065934                                      | 0.987637363                                |
| 1.143377876                               | 151.6407353                                             | 98.8322159                                       | 0.965775853                                |
| 1.444690667                               | 98.88708643                                             | 937.1716094                                      | 0.91191294                                 |
| 4.574698934                               | 87.50972264                                             | 2243.060995                                      | 0.758922286                                |
| 2.254185223                               | 88.73984085                                             | 1603.625917                                      | 0.849393975                                |
| 1.252288694                               | 180.7342693                                             | 261.2875309                                      | 0.947221856                                |
| 1.395205555                               | 85.95681607                                             | 395.1705676                                      | 0.923004772                                |
| 1.580773549                               | 151.1197108                                             | 475.4604382                                      | 0.897459961                                |
| 1.335285161                               | 130.5964812                                             | 290.2023553                                      | 0.931582063                                |
| 1.412868217                               | 92.80433546                                             | 601.5604386                                      | 0.921406504                                |
| 1.302943281                               | 112.7710962                                             | 343.3505735                                      | 0.938853568                                |
| 1.430740597                               | 103.3604921                                             | 800.2719197                                      | 0.916642788                                |
| 6.278871503                               | 47.32287228                                             | 1487.766287                                      | 0.686695817                                |
| 1.399070617                               | 157.8753107                                             | 2013.064202                                      | 0.92285198                                 |
| 1.312434901                               | 71.82789887                                             | 176.9130097                                      | 0.93584033                                 |
| 1.120604396                               | 59.74584062                                             | 20.30732601                                      | 0.969848901                                |
| 1.109972096                               | 286.1111631                                             | 131.3193353                                      | 0.972506976                                |
| 3.405689732                               | 88.74443015                                             | 1742.671964                                      | 0.809867552                                |
| 1.446952239                               | 53.19618802                                             | 283.9441256                                      | 0.912452596                                |
| 1.818714959                               | 119.8005159                                             | 1957.399324                                      | 0.880941557                                |
| 1.336455991                               | 87.37643234                                             | 178.8397858                                      | 0.925709332                                |
| 6.274260301                               | 82.5417417                                              | 3216.855582                                      | 0.733695673                                |
| 1.210562373                               | 148.4976366                                             | 280.6229791                                      | 0.955688492                                |
| 1.247259691                               | 149.6769739                                             | 710.0492083                                      | 0.948475948                                |
| 1.165181512                               | 274.5871483                                             | 396.6782297                                      | 0.963794138                                |
| 1.334456507                               | 91.72288763                                             | 268.4585894                                      | 0.929044808                                |
| 1.524583892                               | 81.07032104                                             | 325.1421392                                      | 0.90676777                                 |
| 1.569327553                               | 69.96217386                                             | 958.3082958                                      | 0.896679371                                |
| 2.802076148                               | 180.1846503                                             | 3332.186659                                      | 0.838596071                                |
| 3.032927935                               | 57.95658696                                             | 1785.455158                                      | 0.801878024                                |
| 2.291093044                               | 54.07734433                                             | 935.7041701                                      | 0.845948465                                |
| 1.128682834                               | 84.46316918                                             | 47.16431484                                      | 0.969609918                                |
| 1.458845129                               | 122.6623235                                             | 821.7573405                                      | 0.914701868                                |
| 1.13353738                                | 164.8666611                                             | 92.83684738                                      | 0.967470356                                |
| 2.198255197                               | 104.1898459                                             | 1950.903802                                      | 0.866181442                                |
| 1.199906831                               | 83.91819319                                             | 117.8270154                                      | 0.950023292                                |
| 1.845421861                               | 86.20207369                                             | 1075.648047                                      | 0.875732341                                |
| 1.77631427                                | 101.73485                                               | 1603.592793                                      | 0.88169867                                 |
| 1.398982931                               | 89.68083732                                             | 407.377166                                       | 0.916892854                                |
| 3.889500934                               | 104.6164379                                             | 2661.023205                                      | 0.781780219                                |
| 5.267669144                               | 47.9381858                                              | 3388.203544                                      | 0.751195842                                |
| 6.163080224                               | 94.4887096                                              | 4240.709824                                      | 0.7419492                                  |
| 1.256989409                               | 149.3626674                                             | 362.8175682                                      | 0.947972841                                |
| 1.406086763                               | 71.83840394                                             | 338.5218136                                      | 0.9258959                                  |
| 1.317382926                               | 58.68385263                                             | 174.2801949                                      | 0.93665189                                 |
| 1.474088456                               | 90.26249564                                             | 634.5025974                                      | 0.908327841                                |
| 2.570495592                               | 154.6622184                                             | 1391.165104                                      | 0.848751631                                |
| 1.151453545                               | 148.1107489                                             | 129.8683993                                      | 0.964597509                                |
| 1.372009135                               | 151.2463013                                             | 643.7410341                                      | 0.926053719                                |
| 2.820476208                               | 172.7863678                                             | 2399.401798                                      | 0.835235502                                |
| 1.118093975                               | 65.0030015                                              | 27.67137805                                      | 0.970476506                                |
| 3.105159937                               | 81.16737031                                             | 2175.476355                                      | 0.811866955                                |
| 1.878801143                               | 63.35527782                                             | 2075.210386                                      | 0.872128308                                |
| 1.348230192                               | 69.82270979                                             | 273.8833591                                      | 0.92769313                                 |
| 1.213105682                               | 276.438328                                              | 491.5090942                                      | 0.954698584                                |
| 1.224877436                               | 46.25080525                                             | 40.58510072                                      | 0.945638686                                |
| 1.0625                                    | 40.19110577                                             | 12.29166667                                      | 0.984375                                   |
| 2.459482741                               | 191.7367444                                             | 1830.162994                                      | 0.856848246                                |
| 1.353252475                               | 62.92949607                                             | 231.2492127                                      | 0.930729822                                |
| 1.466112333                               | 49.07756549                                             | 290.3860397                                      | 0.909427216                                |
| 2.330487457                               | 103.8687877                                             | 1863.909352                                      | 0.839782801                                |
| 4.209666276                               | 79.0697103                                              | 2663.564416                                      | 0.782237123                                |
| 1.101950271                               | 221.7613868                                             | 57.3126806                                       | 0.975936934                                |
| 1.301439661                               | 150.7195731                                             | 527.9228949                                      | 0.936525457                                |
| 1.185475394                               | 23.55084209                                             | 20.42914477                                      | 0.953631151                                |
| 1.184211552                               | 163.6412195                                             | 136.8742612                                      | 0.955087169                                |
| 1.359918742                               | 128.8059245                                             | 209.540878                                       | 0.926238937                                |

| log.sigma.4.5.mm.3D_glrIm_LongRunHighGrayLevelEmphasis | log.sigma.4.5.mm.3D_glrIm_RunPercentage | log.sigma.4.5.mm.3D_glrIm_LongRunLowGrayLevelEmphasis | log.sigma.4.5.mm.3D_glrIm_RunEntropy |
|--------------------------------------------------------|-----------------------------------------|-------------------------------------------------------|--------------------------------------|
| 183.157302                                             | 0.911570424                             | 0.029847197                                           | 4.512841612                          |
| 250.6140753                                            | 0.806349032                             | 0.032169399                                           | 4.445505785                          |
| 84.35261093                                            | 0.917861799                             | 0.070245756                                           | 3.994325697                          |
| 341.6158218                                            | 0.875124358                             | 0.010628965                                           | 4.709378083                          |
| 234.6169092                                            | 0.961157654                             | 0.027299892                                           | 4.648926116                          |
| 69.95184088                                            | 0.902269861                             | 0.091676098                                           | 3.982694689                          |
| 38.08326834                                            | 0.925274725                             | 0.145230058                                           | 3.542325157                          |
| 130.1709089                                            | 0.92748897                              | 0.059400548                                           | 4.536141523                          |
| 507.7952294                                            | 0.927767355                             | 0.011823398                                           | 5.315537344                          |
| 281.5726315                                            | 0.809732312                             | 0.018105581                                           | 4.502231539                          |
| 81.20461901                                            | 0.902209493                             | 0.081947212                                           | 4.193475985                          |
| 157.4216833                                            | 0.879585408                             | 0.035539548                                           | 4.457314071                          |
| 85.67872191                                            | 0.857585314                             | 0.08392614                                            | 4.339846392                          |
| 142.0207797                                            | 0.901369464                             | 0.0332977                                             | 4.475106077                          |
| 132.4225362                                            | 0.921174979                             | 0.037739481                                           | 4.381078574                          |
| 1626.272012                                            | 0.500838283                             | 0.043524584                                           | 4.957689241                          |
| 130.363193                                             | 0.945763914                             | 0.055358825                                           | 4.341718862                          |
| 137.8406798                                            | 0.852844964                             | 0.039721152                                           | 4.422231569                          |
| 204.7938408                                            | 0.952240068                             | 0.058976088                                           | 4.623047407                          |
| 245.5706526                                            | 0.753701958                             | 0.045423266                                           | 4.490573616                          |
| 459.8244101                                            | 0.681773399                             | 0.033155908                                           | 4.407064211                          |
| 146.2576177                                            | 0.873995092                             | 0.03724701                                            | 4.502852447                          |
| 441.6905352                                            | 0.738672287                             | 0.021190085                                           | 4.4533770013                         |
| 243.8185894                                            | 0.955465587                             | 0.043131894                                           | 4.50048179                           |
| 129.2273956                                            | 0.809375                                | 0.065060757                                           | 4.180049133                          |
| 111.0284056                                            | 0.914161997                             | 0.046787285                                           | 4.149054036                          |
| 277.3278108                                            | 0.74745438                              | 0.031149998                                           | 4.370350837                          |
| 593.0041232                                            | 0.645146638                             | 0.044972515                                           | 4.616067468                          |
| 738.0881161                                            | 0.721288399                             | 0.018182572                                           | 4.684866554                          |
| 361.4563941                                            | 0.788677359                             | 0.022483588                                           | 4.592047816                          |
| 442.54302                                              | 0.695328951                             | 0.033831069                                           | 4.5300747                            |
| 689.9109724                                            | 0.630816257                             | 0.03891693                                            | 4.735575524                          |
| 192.960104                                             | 0.87711137                              | 0.027839331                                           | 4.587417371                          |
| 75.5421454                                             | 0.984615385                             | 0.11592185                                            | 3.510294451                          |
| 173.5587443                                            | 0.955752212                             | 0.028822131                                           | 4.287087561                          |
| 144.8774656                                            | 0.883173798                             | 0.031306091                                           | 4.377819336                          |
| 729.381047                                             | 0.620270628                             | 0.037691707                                           | 4.695902133                          |
| 258.1013167                                            | 0.774812259                             | 0.035029099                                           | 4.638261599                          |
| 229.5595486                                            | 0.93002636                              | 0.024251402                                           | 4.615341092                          |
| 123.1944726                                            | 0.896433176                             | 0.057632967                                           | 4.399853472                          |
| 276.7643044                                            | 0.861646046                             | 0.016473029                                           | 4.438040365                          |
| 158.7190767                                            | 0.908540279                             | 0.025628805                                           | 4.460512897                          |
| 126.6333562                                            | 0.89339059                              | 0.030290815                                           | 4.26570788                           |
| 135.3260152                                            | 0.91676888                              | 0.047763327                                           | 4.550589673                          |
| 146.9560396                                            | 0.88858227                              | 0.037358153                                           | 4.532601836                          |
| 619.5495551                                            | 0.541590229                             | 0.079001996                                           | 4.545141501                          |
| 220.9125469                                            | 0.8951762                               | 0.017807217                                           | 4.673380341                          |
| 83.86499959                                            | 0.914304993                             | 0.08745242                                            | 4.217491442                          |
| 65.76318265                                            | 0.968531469                             | 0.13651959                                            | 3.471315619                          |
| 319.5065884                                            | 0.965226554                             | 0.019442436                                           | 4.702037588                          |
| 478.6332972                                            | 0.691666667                             | 0.035692248                                           | 4.609837081                          |
| 69.45200821                                            | 0.882992938                             | 0.079376973                                           | 4.067469996                          |
| 274.4061764                                            | 0.829083905                             | 0.021894077                                           | 4.522048922                          |
| 121.5187709                                            | 0.90537496                              | 0.061856911                                           | 4.266804181                          |
| 890.890645                                             | 0.565363524                             | 0.052770185                                           | 4.783137545                          |
| 176.4453782                                            | 0.939839265                             | 0.025370213                                           | 4.46021471                           |
| 182.4765099                                            | 0.930310515                             | 0.01589809                                            | 4.357655992                          |
| 322.2985945                                            | 0.951293248                             | 0.022869351                                           | 4.749885267                          |
| 120.4182909                                            | 0.907648848                             | 0.060765233                                           | 4.363482659                          |
| 126.3765132                                            | 0.87702212                              | 0.05027456                                            | 4.341969967                          |
| 121.283084                                             | 0.860163891                             | 0.042729914                                           | 4.245221674                          |
| 701.3772066                                            | 0.740838707                             | 0.015566114                                           | 4.909824343                          |
| 241.965101                                             | 0.71190665                              | 0.064698065                                           | 4.490827473                          |
| 172.7951253                                            | 0.772943106                             | 0.055343404                                           | 4.197089758                          |
| 95.83427087                                            | 0.960812772                             | 0.05408047                                            | 3.754252853                          |
| 194.6115484                                            | 0.885149573                             | 0.026817356                                           | 4.441216239                          |
| 185.9490054                                            | 0.958974359                             | 0.037761048                                           | 4.310955404                          |
| 327.2716508                                            | 0.790397373                             | 0.033699779                                           | 4.752288852                          |
| 94.95307128                                            | 0.938138784                             | 0.069827659                                           | 4.128477347                          |
| 198.8193819                                            | 0.823016827                             | 0.032430262                                           | 4.4155587                            |
| 218.1121399                                            | 0.833101489                             | 0.028103263                                           | 4.476197585                          |
| 122.5709027                                            | 0.891602225                             | 0.035869049                                           | 4.335195652                          |
| 698.6250804                                            | 0.658516912                             | 0.02725251                                            | 4.620884282                          |
| 495.8079028                                            | 0.594133852                             | 0.091704956                                           | 4.710086959                          |
| 940.1823491                                            | 0.568856724                             | 0.049456876                                           | 4.920112646                          |
| 182.6726389                                            | 0.929113487                             | 0.024156242                                           | 4.469245188                          |
| 93.02801892                                            | 0.897604588                             | 0.048545184                                           | 4.123418689                          |
| 68.08764904                                            | 0.914835165                             | 0.110106109                                           | 4.110099345                          |
| 141.687984                                             | 0.878844048                             | 0.029898997                                           | 4.24389423                           |
| 562.5397248                                            | 0.754807692                             | 0.015919004                                           | 4.465443063                          |
| 167.3295435                                            | 0.954052659                             | 0.025534498                                           | 4.326017059                          |
| 210.6421299                                            | 0.901022677                             | 0.01798851                                            | 4.541958745                          |
| 671.3571477                                            | 0.737238011                             | 0.015521937                                           | 4.694431134                          |
| 73.3533236                                             | 0.962779156                             | 0.068391991                                           | 3.579462697                          |
| 374.7444436                                            | 0.706848975                             | 0.034933406                                           | 4.480236551                          |
| 124.8609636                                            | 0.818758088                             | 0.048293473                                           | 4.264385395                          |
| 88.42996147                                            | 0.904531085                             | 0.074641764                                           | 4.254710261                          |
| 330.1393353                                            | 0.938748857                             | 0.009767346                                           | 4.643825339                          |
| 55.82581767                                            | 0.932307692                             | 0.061551653                                           | 3.355185165                          |
| 40.89423077                                            | 0.980769231                             | 0.140983631                                           | 3.242083234                          |
| 667.2713875                                            | 0.765551742                             | 0.012746937                                           | 4.742192465                          |
| 76.55793348                                            | 0.907135628                             | 0.168237221                                           | 4.264596244                          |
| 76.20557873                                            | 0.880177515                             | 0.096094797                                           | 4.071711324                          |
| 343.0413496                                            | 0.766703176                             | 0.024149856                                           | 4.601256904                          |
| 545.4116446                                            | 0.643461219                             | 0.044377434                                           | 4.775595359                          |
| 243.8440034                                            | 0.968253968                             | 0.025607742                                           | 4.152023807                          |
| 194.1250488                                            | 0.915497738                             | 0.02532697                                            | 4.619999874                          |
| 26.55523172                                            | 0.945512821                             | 0.298410327                                           | 3.046434556                          |
| 198.1767447                                            | 0.943369514                             | 0.031973492                                           | 4.512843147                          |
| 187.7572745                                            | 0.903296703                             | 0.028005869                                           | 4.372577621                          |

| log.sigma.4.5.mm.3D_girlm_HighGrayLevelRunEmphasis | log.sigma.4.5.mm.3D_girlm_RunLengthNonUniformityNormalized | log.sigma.4.5.mm.3D_glszm_GrayLevelVariance |
|----------------------------------------------------|------------------------------------------------------------|---------------------------------------------|
| 140.9309882                                        | 0.83894352                                                 | 19.4                                        |
| 114.0290996                                        | 0.708152452                                                | 13.22596908                                 |
| 71.86615423                                        | 0.848280367                                                | 11.40922254                                 |
| 229.7559849                                        | 0.793429205                                                | 25.85320039                                 |
| 216.8866566                                        | 0.922724139                                                | 44.96952909                                 |
| 58.68100495                                        | 0.827417629                                                | 9.084897959                                 |
| 32.91529829                                        | 0.855666647                                                | 6.4896                                      |
| 115.0616559                                        | 0.865970495                                                | 25.94984375                                 |
| 396.0315474                                        | 0.867790003                                                | 60.24348198                                 |
| 147.0474285                                        | 0.70335077                                                 | 17.53643537                                 |
| 68.69419927                                        | 0.827386664                                                | 12.03729253                                 |
| 111.4604554                                        | 0.790324225                                                | 21.4775                                     |
| 62.66228488                                        | 0.762356439                                                | 18.17669558                                 |
| 116.4539693                                        | 0.826318886                                                | 16.11781741                                 |
| 112.8571655                                        | 0.853975644                                                | 18.11725207                                 |
| 185.1049796                                        | 0.424323508                                                | 14.68458962                                 |
| 117.6262691                                        | 0.894010332                                                | 19.58127347                                 |
| 93.09882922                                        | 0.756470906                                                | 15.10021001                                 |
| 185.4531011                                        | 0.907760029                                                | 36.66993164                                 |
| 84.18861121                                        | 0.652696256                                                | 10.06759983                                 |
| 107.210639                                         | 0.5914633                                                  | 13.28621097                                 |
| 107.4321059                                        | 0.789954949                                                | 19.08948347                                 |
| 151.1301872                                        | 0.626946498                                                | 15.45927842                                 |
| 209.7406069                                        | 0.915304238                                                | 28.98061224                                 |
| 65.5574462                                         | 0.698549885                                                | 10.99247571                                 |
| 88.37318812                                        | 0.842183198                                                | 13.13171488                                 |
| 108.6362226                                        | 0.637123758                                                | 13.36458815                                 |
| 109.1930327                                        | 0.564884447                                                | 13.36789931                                 |
| 190.2095367                                        | 0.653519344                                                | 20.19076379                                 |
| 140.0055532                                        | 0.700443872                                                | 17.8357193                                  |
| 110.6118486                                        | 0.607452375                                                | 15.46915048                                 |
| 130.9504658                                        | 0.557604959                                                | 15.06792832                                 |
| 128.0420992                                        | 0.798263585                                                | 22.48148929                                 |
| 72.21245421                                        | 0.969387755                                                | 19.55555556                                 |
| 155.7097089                                        | 0.914217198                                                | 25.21396684                                 |
| 106.6278443                                        | 0.794708392                                                | 16.53656658                                 |
| 124.5042643                                        | 0.535959244                                                | 13.97406136                                 |
| 105.4407818                                        | 0.679680991                                                | 15.32797204                                 |
| 188.8066502                                        | 0.872609392                                                | 24.97222222                                 |
| 91.77653666                                        | 0.819012553                                                | 15.26205666                                 |
| 169.5207577                                        | 0.768149442                                                | 17.96969868                                 |
| 135.4296504                                        | 0.837052038                                                | 22.51655629                                 |
| 98.27269927                                        | 0.815532958                                                | 14.61863809                                 |
| 116.7683939                                        | 0.852533529                                                | 23.84443783                                 |
| 110.6526993                                        | 0.805787781                                                | 18.71508817                                 |
| 76.49038228                                        | 0.440565263                                                | 6.97875885                                  |
| 168.1741657                                        | 0.818050505                                                | 30.00931371                                 |
| 74.03306467                                        | 0.846860171                                                | 11.80547293                                 |
| 60.94930902                                        | 0.943119004                                                | 13.75147929                                 |
| 292.7902481                                        | 0.930700941                                                | 43.09452479                                 |
| 113.883279                                         | 0.614011062                                                | 15.22435821                                 |
| 55.99315329                                        | 0.796773552                                                | 9.278185255                                 |
| 138.0045079                                        | 0.736157355                                                | 18.40529671                                 |
| 93.37706452                                        | 0.824438585                                                | 14.95145073                                 |
| 119.5499198                                        | 0.499385539                                                | 10.709375                                   |
| 153.5144235                                        | 0.890577891                                                | 21.14737654                                 |
| 155.3708437                                        | 0.874287422                                                | 18.12262354                                 |
| 283.1334861                                        | 0.909689073                                                | 34.51267538                                 |
| 96.90044538                                        | 0.832838243                                                | 18.46264793                                 |
| 87.99051725                                        | 0.78890106                                                 | 13.55320988                                 |
| 77.60186475                                        | 0.764650312                                                | 13.71455515                                 |
| 219.2059306                                        | 0.661046742                                                | 28.32500361                                 |
| 73.5280649                                         | 0.60389533                                                 | 10.08737719                                 |
| 65.82625551                                        | 0.674544197                                                | 8.338040426                                 |
| 86.53226131                                        | 0.924469596                                                | 13.046875                                   |
| 133.6664138                                        | 0.802664001                                                | 18.28958678                                 |
| 168.9292838                                        | 0.919937102                                                | 24.06222222                                 |
| 123.502699                                         | 0.709711634                                                | 19.87027211                                 |
| 86.12516881                                        | 0.87708215                                                 | 14.38248521                                 |
| 99.58800053                                        | 0.726444362                                                | 13.10621487                                 |
| 116.2915321                                        | 0.737578466                                                | 15.14498516                                 |
| 95.3569457                                         | 0.804921602                                                | 15.83244898                                 |
| 142.1226728                                        | 0.568996508                                                | 11.60227596                                 |
| 69.89941121                                        | 0.523800395                                                | 9.432492734                                 |
| 131.2656932                                        | 0.510760958                                                | 17.34237172                                 |
| 154.9461254                                        | 0.873875511                                                | 20.81787453                                 |
| 75.26404417                                        | 0.825282706                                                | 12.10321046                                 |
| 60.39635987                                        | 0.848558988                                                | 15.20926688                                 |
| 98.44921951                                        | 0.78858902                                                 | 15.9459                                     |
| 185.9010085                                        | 0.679177426                                                | 17.04557116                                 |
| 151.8580408                                        | 0.912126537                                                | 22.83543253                                 |
| 161.1471377                                        | 0.824752611                                                | 22.41880711                                 |
| 211.5524432                                        | 0.656031232                                                | 21.57171427                                 |
| 66.67306592                                        | 0.925867755                                                | 11.90432099                                 |
| 102.9042055                                        | 0.616560941                                                | 11.9595198                                  |
| 71.10779194                                        | 0.719688137                                                | 11.10460068                                 |
| 73.1328652                                         | 0.828349732                                                | 16.35644612                                 |
| 285.8816293                                        | 0.888241469                                                | 29.68089991                                 |
| 48.14202475                                        | 0.868525717                                                | 7.523809524                                 |
| 40.33173077                                        | 0.961805556                                                | 9.1875                                      |
| 229.7783435                                        | 0.694456686                                                | 22.09219799                                 |
| 65.17368887                                        | 0.836106329                                                | 19.9456                                     |
| 53.46013375                                        | 0.790913974                                                | 11.25234375                                 |
| 127.4776301                                        | 0.662236333                                                | 14.79134831                                 |
| 105.9845613                                        | 0.570159171                                                | 15.29719338                                 |
| 225.7220696                                        | 0.938952078                                                | 31.1374096                                  |
| 158.3569431                                        | 0.847196922                                                | 23.514375                                   |
| 24.15172002                                        | 0.893542094                                                | 5.833333333                                 |
| 170.3726554                                        | 0.888964347                                                | 28.64653796                                 |
| 138.6075738                                        | 0.826093278                                                | 20.5116966                                  |

| log.sigma.4.5.mm.3D_glszm_SmallAreaHighGrayLevelEmphasis | log.sigma.4.5.mm.3D_glszm_GrayLevelNonUniformityNormalized | log.sigma.4.5.mm.3D_glszm_SizeZoneNonUniformityNormalized |
|----------------------------------------------------------|------------------------------------------------------------|-----------------------------------------------------------|
| 94.3045012                                               | 0.0696                                                     | 0.3242                                                    |
| 87.30182822                                              | 0.080998811                                                | 0.318335315                                               |
| 72.71539079                                              | 0.086656271                                                | 0.414568946                                               |
| 208.6896095                                              | 0.055999172                                                | 0.400388667                                               |
| 198.858488                                               | 0.044629117                                                | 0.440443213                                               |
| 60.56923383                                              | 0.103673469                                                | 0.328979592                                               |
| 32.09873457                                              | 0.1232                                                     | 0.2896                                                    |
| 130.2343503                                              | 0.060078125                                                | 0.425078125                                               |
| 252.8545068                                              | 0.037395266                                                | 0.3409356                                                 |
| 123.9694138                                              | 0.0703003                                                  | 0.32115366                                                |
| 71.04385163                                              | 0.08476197                                                 | 0.324226487                                               |
| 103.1941125                                              | 0.06546875                                                 | 0.374453125                                               |
| 85.19458589                                              | 0.072740933                                                | 0.340516358                                               |
| 110.9104122                                              | 0.073159579                                                | 0.344459686                                               |
| 107.5233883                                              | 0.068755739                                                | 0.32805326                                                |
| 137.9452402                                              | 0.081876817                                                | 0.367806228                                               |
| 108.3249951                                              | 0.067342126                                                | 0.385972574                                               |
| 109.0061222                                              | 0.078661432                                                | 0.41268718                                                |
| 176.4720874                                              | 0.048260382                                                | 0.426793184                                               |
| 62.15859933                                              | 0.094943576                                                | 0.336425781                                               |
| 82.11932828                                              | 0.083873246                                                | 0.328373859                                               |
| 91.71770434                                              | 0.066900826                                                | 0.305950413                                               |
| 114.8872993                                              | 0.076808305                                                | 0.349311916                                               |
| 131.0648373                                              | 0.055918367                                                | 0.394693878                                               |
| 59.19892818                                              | 0.08788078                                                 | 0.329096355                                               |
| 71.85789942                                              | 0.080061983                                                | 0.28822314                                                |
| 90.93595007                                              | 0.079724041                                                | 0.346690471                                               |
| 74.68280079                                              | 0.0884375                                                  | 0.309340278                                               |
| 151.3497092                                              | 0.06553213                                                 | 0.390884989                                               |
| 95.05591077                                              | 0.067305638                                                | 0.337199719                                               |
| 97.36183317                                              | 0.073853878                                                | 0.354560268                                               |
| 120.3967323                                              | 0.078166828                                                | 0.371012418                                               |
| 123.1626625                                              | 0.060801428                                                | 0.37306586                                                |
| 60.70833333                                              | 0.083333333                                                | 0.625                                                     |
| 121.4811458                                              | 0.059311224                                                | 0.333545918                                               |
| 113.3577388                                              | 0.073744437                                                | 0.355909824                                               |
| 92.53956816                                              | 0.078831264                                                | 0.366588751                                               |
| 96.29767531                                              | 0.07372374                                                 | 0.337938853                                               |
| 143.9755068                                              | 0.060416667                                                | 0.291111111                                               |
| 70.00822459                                              | 0.077638408                                                | 0.340073529                                               |
| 111.481932                                               | 0.068912884                                                | 0.30001696                                                |
| 143.4797881                                              | 0.062234113                                                | 0.425200649                                               |
| 98.27959806                                              | 0.075875746                                                | 0.34268988                                                |
| 115.4377798                                              | 0.06097561                                                 | 0.362209994                                               |
| 88.96647234                                              | 0.071563555                                                | 0.31434008                                                |
| 45.66985967                                              | 0.111481327                                                | 0.354805868                                               |
| 160.7219447                                              | 0.056778658                                                | 0.361132525                                               |
| 86.95771613                                              | 0.085663296                                                | 0.404223676                                               |
| 57.39957265                                              | 0.088757396                                                | 0.384615385                                               |
| 209.8291709                                              | 0.048811983                                                | 0.43982438                                                |
| 82.90741929                                              | 0.07390926                                                 | 0.30861121                                                |
| 69.78862108                                              | 0.098979206                                                | 0.384347826                                               |
| 108.5172492                                              | 0.068833075                                                | 0.348589354                                               |
| 68.97428118                                              | 0.077851192                                                | 0.240448147                                               |
| 82.51681389                                              | 0.089852071                                                | 0.340939349                                               |
| 127.9317283                                              | 0.062789352                                                | 0.359664352                                               |
| 147.3575876                                              | 0.068746032                                                | 0.391526613                                               |
| 216.9429252                                              | 0.049864477                                                | 0.37890625                                                |
| 90.09250875                                              | 0.068971893                                                | 0.365754438                                               |
| 65.5073925                                               | 0.077530864                                                | 0.265432099                                               |
| 87.95719345                                              | 0.087669095                                                | 0.410835068                                               |
| 196.2978656                                              | 0.054077788                                                | 0.372730572                                               |
| 59.94254604                                              | 0.091893134                                                | 0.346509624                                               |
| 47.85696523                                              | 0.100114711                                                | 0.301056129                                               |
| 76.82508681                                              | 0.091796875                                                | 0.474609375                                               |
| 116.2521567                                              | 0.067557025                                                | 0.370419835                                               |
| 149.7603218                                              | 0.06                                                       | 0.448888889                                               |
| 94.60051505                                              | 0.066655329                                                | 0.316394558                                               |
| 85.34944584                                              | 0.079289941                                                | 0.388402367                                               |
| 86.13848355                                              | 0.080782934                                                | 0.413813151                                               |
| 101.9435062                                              | 0.0740707                                                  | 0.383043524                                               |
| 103.427573                                               | 0.07877551                                                 | 0.372244898                                               |
| 110.1731792                                              | 0.088956589                                                | 0.386377304                                               |
| 48.65964607                                              | 0.09506436                                                 | 0.363598616                                               |
| 117.5576031                                              | 0.070226184                                                | 0.350781722                                               |
| 145.9856402                                              | 0.06726609                                                 | 0.401297999                                               |
| 74.2403462                                               | 0.083186683                                                | 0.342306778                                               |
| 72.26299992                                              | 0.079408627                                                | 0.34613626                                                |
| 98.38535851                                              | 0.07145                                                    | 0.4185                                                    |
| 149.1265581                                              | 0.070676286                                                | 0.353670769                                               |
| 139.4518235                                              | 0.062422145                                                | 0.468512111                                               |
| 143.0962198                                              | 0.060598381                                                | 0.40796947                                                |
| 161.4316678                                              | 0.061031733                                                | 0.347764878                                               |
| 46.47839506                                              | 0.086419753                                                | 0.401234568                                               |
| 92.4468254                                               | 0.082903285                                                | 0.372986386                                               |
| 69.27502229                                              | 0.087213524                                                | 0.338196668                                               |
| 80.99645929                                              | 0.076899811                                                | 0.356975425                                               |
| 237.1881817                                              | 0.057105142                                                | 0.392705464                                               |
| 34.56045795                                              | 0.111111111                                                | 0.328798186                                               |
| 41.6875                                                  | 0.111111111                                                | 0.847222222                                               |
| 173.9454095                                              | 0.063445505                                                | 0.364411766                                               |
| 74.14742653                                              | 0.0684                                                     | 0.362                                                     |
| 41.30948603                                              | 0.085625                                                   | 0.265                                                     |
| 85.63068005                                              | 0.075505836                                                | 0.333712431                                               |
| 85.88827228                                              | 0.075240816                                                | 0.365978362                                               |
| 191.5099715                                              | 0.067718606                                                | 0.47008547                                                |
| 154.8323644                                              | 0.05935                                                    | 0.37115                                                   |
| 20.77141204                                              | 0.138888889                                                | 0.319444444                                               |
| 128.8157999                                              | 0.054434606                                                | 0.393235593                                               |
| 92.96546887                                              | 0.063563327                                                | 0.34168242                                                |

| log.sigma.4.5.mm.3D_glszm_SizeZoneNonUniformity | log.sigma.4.5.mm.3D_glszm_GrayLevelNonUniformity | log.sigma.4.5.mm.3D_glszm_LargeAreaEmphasis | log.sigma.4.5.mm.3D_glszm_ZoneVariance |
|-------------------------------------------------|--------------------------------------------------|---------------------------------------------|----------------------------------------|
| 32.42                                           | 6.96                                             | 41.89                                       | 28.8579                                |
| 46.15862069                                     | 11.74482759                                      | 807.937931                                  | 714.3156243                            |
| 27.7761194                                      | 5.805970149                                      | 22.19402985                                 | 15.21496993                            |
| 184.5791757                                     | 25.81561822                                      | 200.527115                                  | 182.9453748                            |
| 25.10526316                                     | 2.543859649                                      | 4.824561404                                 | 1.6848261                              |
| 23.02857143                                     | 7.257142857                                      | 41.08571429                                 | 28.9355102                             |
| 7.24                                            | 3.08                                             | 15.68                                       | 7.84                                   |
| 68.0125                                         | 9.6125                                           | 20.50625                                    | 14.22496094                            |
| 186.4917733                                     | 20.45521024                                      | 22.31444241                                 | 15.03332453                            |
| 86.39033457                                     | 18.91078067                                      | 1215.163569                                 | 1140.845068                            |
| 39.23140496                                     | 10.25619835                                      | 43.17355372                                 | 33.51738269                            |
| 59.9125                                         | 10.475                                           | 138.54375                                   | 116.1590234                            |
| 82.40495868                                     | 17.60330579                                      | 413.1487603                                 | 381.286934                             |
| 55.80246914                                     | 11.85185185                                      | 52.27160494                                 | 41.64883402                            |
| 43.3030303                                      | 9.075757576                                      | 17.33333333                                 | 9.729109275                            |
| 156.3176471                                     | 34.79764706                                      | 57131.70353                                 | 56482.59303                            |
| 41.29906542                                     | 7.205607477                                      | 7.242990654                                 | 3.130055027                            |
| 122.1554054                                     | 23.28378378                                      | 396.472973                                  | 368.9813733                            |
| 42.25252525                                     | 4.777777778                                      | 5.535353535                                 | 2.155698398                            |
| 64.59375                                        | 18.22916667                                      | 3049.895833                                 | 2841.153537                            |
| 98.84053156                                     | 25.24584718                                      | 9267.325581                                 | 8983.050297                            |
| 67.30909091                                     | 14.71818182                                      | 123.7954545                                 | 106.7235331                            |
| 87.67729084                                     | 19.27888446                                      | 3129.378486                                 | 2994.040952                            |
| 27.62857143                                     | 3.914285714                                      | 5.871428571                                 | 2.261428571                            |
| 38.5042735                                      | 10.28205128                                      | 617.2820513                                 | 549.9579224                            |
| 25.36363636                                     | 7.045454545                                      | 34.5                                        | 22.72262397                            |
| 73.84507042                                     | 16.98122066                                      | 2500.530516                                 | 2385.043708                            |
| 74.24166667                                     | 21.225                                           | 7972.879167                                 | 7709.493316                            |
| 173.9438202                                     | 29.16179775                                      | 2731.761798                                 | 2662.029915                            |
| 61.03314917                                     | 12.18232044                                      | 931.0552486                                 | 843.565581                             |
| 92.54022989                                     | 19.27586207                                      | 7191.988506                                 | 6932.914197                            |
| 243.3841463                                     | 51.27743902                                      | 15200.22409                                 | 15018.9195                             |
| 105.9507042                                     | 17.26760563                                      | 205.4401408                                 | 181.5197753                            |
| 7.5                                             | 1                                                | 1.75                                        | 0.1875                                 |
| 18.67857143                                     | 3.321428571                                      | 6.267857143                                 | 2.196109694                            |
| 101.7902098                                     | 21.09090909                                      | 212.6923077                                 | 190.9362805                            |
| 135.6378378                                     | 29.16756757                                      | 16883.43514                                 | 16556.4119                             |
| 98.34020619                                     | 21.45360825                                      | 2057.642612                                 | 1949.081966                            |
| 34.93333333                                     | 7.25                                             | 13.39166667                                 | 6.236041667                            |
| 46.25                                           | 10.55882353                                      | 62.97794118                                 | 47.38705666                            |
| 39.90225564                                     | 9.165413534                                      | 164.0827068                                 | 135.1819775                            |
| 64.20529801                                     | 9.397350993                                      | 31.1986755                                  | 24.8322442                             |
| 78.47598253                                     | 17.37554585                                      | 100.628821                                  | 87.68139433                            |
| 59.40243902                                     | 10                                               | 29.5304878                                  | 22.36507287                            |
| 87.07220217                                     | 19.82310469                                      | 140.8555957                                 | 124.652791                             |
| 52.15646259                                     | 16.3877551                                       | 47439.14286                                 | 45704.73201                            |
| 241.2365269                                     | 37.92814371                                      | 221.8772455                                 | 204.9787461                            |
| 33.14634146                                     | 7.024390244                                      | 28.17073171                                 | 20.43961927                            |
| 5                                               | 1.153846154                                      | 3.384615385                                 | 0.520710059                            |
| 38.70454545                                     | 4.295454545                                      | 3.931818182                                 | 1.179235537                            |
| 98.13836478                                     | 23.50314465                                      | 5225.918239                                 | 5061.304497                            |
| 44.2                                            | 11.3826087                                       | 87.4173913                                  | 75.13693762                            |
| 155.470852                                      | 30.69955157                                      | 1028.643498                                 | 977.3252277                            |
| 14.18644068                                     | 4.593220339                                      | 41.81355932                                 | 25.4041942                             |
| 177.2884615                                     | 46.72307692                                      | 43191.30385                                 | 42718.5759                             |
| 51.79166667                                     | 9.041666667                                      | 12.42361111                                 | 7.011525849                            |
| 135.4682081                                     | 23.78612717                                      | 22.26011561                                 | 15.90855024                            |
| 84.875                                          | 11.16964286                                      | 7.464285714                                 | 3.283721301                            |
| 38.03846154                                     | 7.173076923                                      | 42.78846154                                 | 31.2022929                             |
| 23.88888889                                     | 6.977777778                                      | 103.3555556                                 | 76.54617284                            |
| 101.8870968                                     | 21.74193548                                      | 476.1814516                                 | 441.7605196                            |
| 320.9210221                                     | 46.56097561                                      | 3333.965157                                 | 3272.029536                            |
| 102.220339                                      | 27.10847458                                      | 5633.925424                                 | 5443.204642                            |
| 47.86792453                                     | 15.91823899                                      | 1630.012579                                 | 1504.403465                            |
| 15.1875                                         | 2.9375                                           | 3.84375                                     | 1.100585938                            |
| 101.8654545                                     | 18.57818182                                      | 118.3418182                                 | 100.7933355                            |
| 26.93333333                                     | 3.6                                              | 4.783333333                                 | 1.720833333                            |
| 132.8857143                                     | 27.9952381                                       | 1317.792857                                 | 1249.651763                            |
| 25.24615385                                     | 5.153846154                                      | 10.29230769                                 | 5.452307692                            |
| 107.1776062                                     | 20.92277992                                      | 660.3011583                                 | 612.4297193                            |
| 150.1530612                                     | 29.03571429                                      | 831.9413265                                 | 787.9830735                            |
| 52.11428571                                     | 11.02857143                                      | 102.9642857                                 | 86.56178571                            |
| 150.3007712                                     | 34.60411311                                      | 14097.8329                                  | 13768.72294                            |
| 154.5294118                                     | 40.40235294                                      | 36992.01412                                 | 36342.18405                            |
| 317.4574586                                     | 63.55469613                                      | 37643.41105                                 | 37386.03019                            |
| 69.02325581                                     | 11.56976744                                      | 24.1627907                                  | 17.43902109                            |
| 49.63448276                                     | 12.06206897                                      | 49.07586207                                 | 39.18592152                            |
| 28.03703704                                     | 6.432098765                                      | 27.38271605                                 | 19.73510136                            |
| 83.7                                            | 14.29                                            | 177.265                                     | 156.425775                             |
| 113.8819876                                     | 22.75776398                                      | 1623.15528                                  | 1552.637012                            |
| 39.82352941                                     | 5.305882353                                      | 5.023529412                                 | 1.950726644                            |
| 105.6640927                                     | 15.69498069                                      | 79.57915058                                 | 68.42509802                            |
| 187.445269                                      | 32.8961039                                       | 3635.411874                                 | 3551.786108                            |
| 7.222222222                                     | 1.555555556                                      | 4.055555556                                 | 1.089506173                            |
| 142.8537859                                     | 31.75195822                                      | 6114.851175                                 | 5947.003252                            |
| 153.2030905                                     | 39.50772627                                      | 1673.887417                                 | 1613.95316                             |
| 41.05217391                                     | 8.843478261                                      | 45.05217391                                 | 34.97844991                            |
| 103.6742424                                     | 15.07575758                                      | 18.125                                      | 13.14736857                            |
| 6.904761905                                     | 2.333333333                                      | 10.28571429                                 | 4.616780045                            |
| 10.16666667                                     | 1.333333333                                      | 1.25                                        | 0.076388889                            |
| 174.5532359                                     | 30.39039666                                      | 1357.505219                                 | 1306.258751                            |
| 36.2                                            | 6.84                                             | 36.62                                       | 27.3784                                |
| 21.2                                            | 6.85                                             | 111.825                                     | 84.785                                 |
| 103.7845659                                     | 23.48231511                                      | 2819.62701                                  | 2681.734473                            |
| 140.1697128                                     | 28.81723238                                      | 16345.5248                                  | 15989.9611                             |
| 18.33333333                                     | 2.641025641                                      | 3.41025641                                  | 0.800788955                            |
| 74.23                                           | 11.87                                            | 50.38                                       | 38.82                                  |
| 3.833333333                                     | 1.666666667                                      | 5.166666667                                 | 1.166666667                            |
| 32.63855422                                     | 4.518072289                                      | 6.012048193                                 | 2.155320075                            |
| 31.43478261                                     | 5.847826087                                      | 28.26086957                                 | 18.99810964                            |

| log.sigma.4.5.mm.3D_glszm_ZonePercentage | log.sigma.4.5.mm.3D_glszm_LargeAreaLowGrayLevelEmphasis | log.sigma.4.5.mm.3D_glszm_LargeAreaHighGrayLevelEmphasis | log.sigma.4.5.mm.3D_glszm_HighGrayLevelZoneEmphasis |
|------------------------------------------|---------------------------------------------------------|----------------------------------------------------------|-----------------------------------------------------|
| 0.27700831                               | 0.767564864                                             | 5390.43                                                  | 158.64                                              |
| 0.103349964                              | 7.795320162                                             | 110665.6207                                              | 131.5103448                                         |
| 0.378531073                              | 1.195659528                                             | 933.5970149                                              | 98.14925373                                         |
| 0.238489395                              | 1.181862589                                             | 41657.60304                                              | 294.0737527                                         |
| 0.564356436                              | 0.100765436                                             | 761.7192982                                              | 259.0526316                                         |
| 0.286885246                              | 3.062258538                                             | 1377.514286                                              | 89.57142857                                         |
| 0.357142857                              | 1.945053014                                             | 281.76                                                   | 49                                                  |
| 0.399002494                              | 0.986409492                                             | 1155.44375                                               | 167.2625                                            |
| 0.370596206                              | 0.174627885                                             | 11721.69653                                              | 393.3893967                                         |
| 0.115998275                              | 9.650137209                                             | 170332.9368                                              | 193.2713755                                         |
| 0.321808511                              | 2.53003701                                              | 1236.92562                                               | 104.5785124                                         |
| 0.211360634                              | 2.168806569                                             | 13396.3875                                               | 145.8                                               |
| 0.17715959                               | 16.50798797                                             | 13137.30579                                              | 120.5041322                                         |
| 0.306818182                              | 1.389290771                                             | 3020.475309                                              | 165.8024691                                         |
| 0.362637363                              | 0.589829212                                             | 1254.219697                                              | 155.1136364                                         |
| 0.039250092                              | 282.9904907                                             | 11682584.18                                              | 208.32                                              |
| 0.493087558                              | 0.478771417                                             | 550.7943925                                              | 147.6728972                                         |
| 0.190721649                              | 8.215853655                                             | 26564.14865                                              | 148.1283784                                         |
| 0.543956044                              | 0.361347821                                             | 795.4747475                                              | 223.1717172                                         |
| 0.069214131                              | 43.35803503                                             | 305599.9323                                              | 95.82291667                                         |
| 0.059310345                              | 76.83364219                                             | 1228951.043                                              | 123.1528239                                         |
| 0.242024202                              | 2.616383216                                             | 7674.563636                                              | 153.1227273                                         |
| 0.085958904                              | 19.91073031                                             | 535079.9084                                              | 168.3904382                                         |
| 0.526315789                              | 0.197633052                                             | 1468.028571                                              | 196.1285714                                         |
| 0.121875                                 | 12.55477697                                             | 42274.03419                                              | 84.92307692                                         |
| 0.291390728                              | 0.933700769                                             | 2490.852273                                              | 111.7727273                                         |
| 0.093053735                              | 23.45444219                                             | 288094.6761                                              | 140.5352113                                         |
| 0.061617458                              | 54.65796381                                             | 1261522.817                                              | 114.4541667                                         |
| 0.119752422                              | 11.3441638                                              | 717380.5124                                              | 211.0651685                                         |
| 0.106910809                              | 6.203624916                                             | 173409.3425                                              | 135.6961326                                         |
| 0.062128065                              | 59.83930656                                             | 977102.9617                                              | 144.9578544                                         |
| 0.074266953                              | 103.4384391                                             | 2350532.191                                              | 179.1890244                                         |
| 0.204463643                              | 2.775323719                                             | 23200.61268                                              | 171.5105634                                         |
| 0.8                                      | 0.1637587                                               | 123.8333333                                              | 73.33333333                                         |
| 0.495575221                              | 0.126720821                                             | 801.6964286                                              | 181.0178571                                         |
| 0.214392804                              | 3.576054537                                             | 15399.05594                                              | 158.7797203                                         |
| 0.055298162                              | 107.4277757                                             | 2833174.689                                              | 133.1378378                                         |
| 0.095976253                              | 26.91188485                                             | 228665.8179                                              | 148.3298969                                         |
| 0.373831776                              | 0.2654286                                               | 2057.316667                                              | 225.6666667                                         |
| 0.253258845                              | 2.358494724                                             | 4781.514706                                              | 104.5367647                                         |
| 0.186013986                              | 1.140597475                                             | 30639.42857                                              | 187.3609023                                         |
| 0.396325459                              | 0.66028335                                              | 1941.907285                                              | 191.5165563                                         |
| 0.277912621                              | 2.019797014                                             | 6097.50655                                               | 141.7467249                                         |
| 0.37357631                               | 1.097464536                                             | 1443.945122                                              | 164.3536585                                         |
| 0.248430493                              | 2.808509171                                             | 9187.115523                                              | 144.1227437                                         |
| 0.024011761                              | 501.8592432                                             | 4776673.694                                              | 67.75510204                                         |
| 0.243262928                              | 2.06798234                                              | 29822.33832                                              | 235.4251497                                         |
| 0.359649123                              | 2.047395492                                             | 883.2195122                                              | 116.2439024                                         |
| 0.590909091                              | 0.406241242                                             | 179.4615385                                              | 72.92307692                                         |
| 0.602739726                              | 0.060002027                                             | 983.6818182                                              | 308.6363636                                         |
| 0.077941176                              | 41.06334922                                             | 756849.283                                               | 133.0628931                                         |
| 0.285359801                              | 4.623792462                                             | 2210.226087                                              | 94.07826087                                         |
| 0.139593114                              | 7.766349129                                             | 172065.5067                                              | 160.367713                                          |
| 0.246861925                              | 1.457860113                                             | 3476.372881                                              | 119.4067797                                         |
| 0.045993278                              | 304.8073377                                             | 6370375.856                                              | 128.975                                             |
| 0.429850746                              | 0.286451768                                             | 1276.034722                                              | 186.5555556                                         |
| 0.396788991                              | 0.30087608                                              | 2302.988439                                              | 200.7630058                                         |
| 0.489082969                              | 0.159757113                                             | 1716.120536                                              | 318.375                                             |
| 0.293785311                              | 1.397148917                                             | 2704.115385                                              | 131.5576923                                         |
| 0.193133047                              | 3.083204229                                             | 6894.711111                                              | 117.3666667                                         |
| 0.170446735                              | 10.42500824                                             | 27251.06855                                              | 114.8467742                                         |
| 0.127066116                              | 13.72084208                                             | 877258.7677                                              | 279.9581882                                         |
| 0.072410407                              | 82.58549458                                             | 471711.4034                                              | 89.93220339                                         |
| 0.089225589                              | 30.76214959                                             | 119083.2264                                              | 74.98113208                                         |
| 0.603773585                              | 0.153852141                                             | 298.125                                                  | 96.3125                                             |
| 0.238715278                              | 1.370648065                                             | 16729.73091                                              | 163.1636364                                         |
| 0.571428571                              | 0.158912631                                             | 644.6833333                                              | 194.8                                               |
| 0.121142198                              | 11.54522088                                             | 223734.9548                                              | 149.5047619                                         |
| 0.454545455                              | 0.791869802                                             | 472.5384615                                              | 115.3076923                                         |
| 0.14453125                               | 8.435348114                                             | 69280.98842                                              | 119.2200772                                         |
| 0.150827241                              | 8.727216519                                             | 100033.1224                                              | 144.3035714                                         |
| 0.24691358                               | 2.174405356                                             | 6766.057143                                              | 146.7714286                                         |
| 0.055122573                              | 82.91426963                                             | 2652845.139                                              | 161.4601542                                         |
| 0.039228355                              | 434.5412936                                             | 3605601.854                                              | 73.09411765                                         |
| 0.062332117                              | 250.7914179                                             | 5877289.986                                              | 177.078453                                          |
| 0.385650224                              | 0.43364849                                              | 2157.319767                                              | 199.9418605                                         |
| 0.317982456                              | 1.921670022                                             | 1787.544828                                              | 106.662069                                          |
| 0.361607143                              | 3.162611446                                             | 597.3703704                                              | 95.7654321                                          |
| 0.21905805                               | 2.415747468                                             | 16125                                                    | 132.37                                              |
| 0.11908284                               | 8.314867388                                             | 352631.8012                                              | 218.5621118                                         |
| 0.570469799                              | 0.097182144                                             | 566.3529412                                              | 177.7647059                                         |
| 0.299421965                              | 0.797103846                                             | 10081.57143                                              | 203.7837838                                         |
| 0.10935281                               | 15.14457247                                             | 920606.564                                               | 238.9016698                                         |
| 0.580645161                              | 0.176437083                                             | 242.6111111                                              | 69.83333333                                         |
| 0.077186618                              | 55.39178609                                             | 751057.6736                                              | 134.3420366                                         |
| 0.129170231                              | 37.91293444                                             | 87734.88962                                              | 108.2191205                                         |
| 0.315068493                              | 2.378174663                                             | 1572.608696                                              | 112.226087                                          |
| 0.448217317                              | 0.126270313                                             | 3374.44697                                               | 342.8636364                                         |
| 0.42                                     | 0.436537378                                             | 364.8571429                                              | 56.52380952                                         |
| 0.923076923                              | 0.163220724                                             | 44.5                                                     | 42.25                                               |
| 0.139690872                              | 4.940382415                                             | 409053.8413                                              | 257.5448852                                         |
| 0.328947368                              | 4.893535739                                             | 956.13                                                   | 103.12                                              |
| 0.192307692                              | 5.261468248                                             | 5074.9375                                                | 72.2875                                             |
| 0.085158817                              | 23.32429821                                             | 408639.0193                                              | 133.0482315                                         |
| 0.053032401                              | 141.606087                                              | 2170109.115                                              | 128.3890339                                         |
| 0.619047619                              | 0.05564273                                              | 672.8205128                                              | 250.025641                                          |
| 0.294117647                              | 0.975144924                                             | 5210.89                                                  | 220.215                                             |
| 0.5                                      | 1.703200874                                             | 88.5                                                     | 30.83333333                                         |
| 0.509202454                              | 0.138120132                                             | 985.626506                                               | 182.0481928                                         |
| 0.328571429                              | 0.34137464                                              | 3952.163043                                              | 148.0543478                                         |

| log.sigma.4.5.mm.3D_glszm_SmallAreaEmphasis | log.sigma.4.5.mm.3D_glszm_LowGrayLevelZoneEmphasis | log.sigma.4.5.mm.3D_glszm_ZoneEntropy | log.sigma.4.5.mm.3D_glszm_SmallAreaLowGrayLevelEmphasis |
|---------------------------------------------|----------------------------------------------------|---------------------------------------|---------------------------------------------------------|
| 0.583642553                                 | 0.024382356                                        | 5.441929057                           | 0.009228346                                             |
| 0.585006956                                 | 0.023582408                                        | 5.474905423                           | 0.006335462                                             |
| 0.666488666                                 | 0.035528418                                        | 4.825886445                           | 0.01490462                                              |
| 0.657015523                                 | 0.008032713                                        | 6.060168798                           | 0.00539036                                              |
| 0.68797987                                  | 0.031775981                                        | 5.280086944                           | 0.027632358                                             |
| 0.583304426                                 | 0.047503886                                        | 4.771632125                           | 0.024693241                                             |
| 0.542229938                                 | 0.076036317                                        | 4.13366069                            | 0.016323817                                             |
| 0.677247978                                 | 0.034258475                                        | 5.570715108                           | 0.01679646                                              |
| 0.604644857                                 | 0.009272439                                        | 6.733211604                           | 0.005704162                                             |
| 0.585511663                                 | 0.013880206                                        | 5.881883629                           | 0.008175982                                             |
| 0.581095643                                 | 0.037263999                                        | 5.202111663                           | 0.009054207                                             |
| 0.633003703                                 | 0.029738468                                        | 5.632753428                           | 0.015123315                                             |
| 0.604984498                                 | 0.0444245                                          | 5.771214705                           | 0.01924352                                              |
| 0.6066082                                   | 0.018043539                                        | 5.507775483                           | 0.010892611                                             |
| 0.589781612                                 | 0.021324704                                        | 5.541215025                           | 0.012667841                                             |
| 0.629695648                                 | 0.010555627                                        | 5.684804231                           | 0.004302788                                             |
| 0.64321824                                  | 0.03466348                                         | 5.264015562                           | 0.018525674                                             |
| 0.666636826                                 | 0.016218525                                        | 5.489045578                           | 0.010287243                                             |
| 0.677645662                                 | 0.02655134                                         | 5.501591565                           | 0.009293448                                             |
| 0.596376822                                 | 0.026702192                                        | 5.33580979                            | 0.014415994                                             |
| 0.592989588                                 | 0.020554701                                        | 5.729321524                           | 0.011906447                                             |
| 0.569023063                                 | 0.021135219                                        | 5.944003165                           | 0.013492241                                             |
| 0.612529616                                 | 0.015197475                                        | 5.600906651                           | 0.005827809                                             |
| 0.64843254                                  | 0.02833594                                         | 5.206008867                           | 0.010699024                                             |
| 0.593883937                                 | 0.043187078                                        | 5.203257242                           | 0.012161357                                             |
| 0.545899792                                 | 0.030596982                                        | 5.141099022                           | 0.00788523                                              |
| 0.60964032                                  | 0.018636229                                        | 5.535367163                           | 0.008006591                                             |
| 0.574753918                                 | 0.029845468                                        | 5.712979606                           | 0.013028997                                             |
| 0.649897309                                 | 0.011459903                                        | 5.911464328                           | 0.007106074                                             |
| 0.602620371                                 | 0.022211013                                        | 5.738854642                           | 0.012898976                                             |
| 0.617971442                                 | 0.019193599                                        | 5.680530412                           | 0.008146604                                             |
| 0.63113135                                  | 0.011867602                                        | 5.794853269                           | 0.005379735                                             |
| 0.634099542                                 | 0.019102137                                        | 5.875707972                           | 0.010959638                                             |
| 0.8125                                      | 0.12914277                                         | 3.584962501                           | 0.120488788                                             |
| 0.580671847                                 | 0.033316062                                        | 5.124057377                           | 0.026566559                                             |
| 0.619575611                                 | 0.02162009                                         | 5.672154943                           | 0.007907408                                             |
| 0.628677734                                 | 0.018636295                                        | 5.754095568                           | 0.011469549                                             |
| 0.600845884                                 | 0.017720715                                        | 5.760039485                           | 0.007450013                                             |
| 0.553025522                                 | 0.01950791                                         | 5.670892471                           | 0.011517194                                             |
| 0.604044783                                 | 0.03881309                                         | 5.441569799                           | 0.01704106                                              |
| 0.561568334                                 | 0.018373808                                        | 5.636462441                           | 0.011989914                                             |
| 0.676407478                                 | 0.017026517                                        | 5.399736386                           | 0.012192923                                             |
| 0.60177484                                  | 0.020018123                                        | 5.531173316                           | 0.010909401                                             |
| 0.621354175                                 | 0.028148872                                        | 5.672751932                           | 0.009623444                                             |
| 0.579203077                                 | 0.024681617                                        | 5.922680607                           | 0.009454446                                             |
| 0.617386866                                 | 0.035541883                                        | 5.062078686                           | 0.022095843                                             |
| 0.62326105                                  | 0.010887384                                        | 6.266286488                           | 0.004718227                                             |
| 0.65827927                                  | 0.028800239                                        | 4.890714505                           | 0.007536278                                             |
| 0.574786325                                 | 0.10241516                                         | 3.700439718                           | 0.029258113                                             |
| 0.684379638                                 | 0.022044249                                        | 5.438132721                           | 0.019333087                                             |
| 0.571466843                                 | 0.022167412                                        | 5.884092241                           | 0.010601173                                             |
| 0.64264965                                  | 0.028927049                                        | 4.89562168                            | 0.009115501                                             |
| 0.610092562                                 | 0.019007658                                        | 5.974442147                           | 0.008272125                                             |
| 0.489837944                                 | 0.035660373                                        | 5.132394532                           | 0.006917415                                             |
| 0.604398524                                 | 0.016034825                                        | 5.700888132                           | 0.007565867                                             |
| 0.619289682                                 | 0.018380204                                        | 5.561932226                           | 0.011765694                                             |
| 0.649224608                                 | 0.011572047                                        | 5.709348057                           | 0.0077110699                                            |
| 0.635112671                                 | 0.014293599                                        | 5.937199154                           | 0.006859697                                             |
| 0.628010157                                 | 0.038770589                                        | 5.339238877                           | 0.013720731                                             |
| 0.522101784                                 | 0.028398679                                        | 5.326652858                           | 0.00910032                                              |
| 0.66392881                                  | 0.031466176                                        | 5.398145623                           | 0.013896547                                             |
| 0.63317988                                  | 0.007948089                                        | 6.260381647                           | 0.003686169                                             |
| 0.608502827                                 | 0.032438028                                        | 5.493039618                           | 0.011745737                                             |
| 0.565622977                                 | 0.03907099                                         | 5.353188462                           | 0.018096906                                             |
| 0.710069444                                 | 0.055790465                                        | 4.140319531                           | 0.042631482                                             |
| 0.631642504                                 | 0.016824324                                        | 5.766722361                           | 0.007115157                                             |
| 0.686108655                                 | 0.027248494                                        | 4.969146221                           | 0.009988104                                             |
| 0.581339814                                 | 0.021120279                                        | 6.115524598                           | 0.007480479                                             |
| 0.644237419                                 | 0.03448904                                         | 4.875762813                           | 0.011780607                                             |
| 0.668673952                                 | 0.022992421                                        | 5.324502876                           | 0.013738592                                             |
| 0.642960764                                 | 0.020454093                                        | 5.66990775                            | 0.008455339                                             |
| 0.631829733                                 | 0.021275484                                        | 5.341718663                           | 0.013384584                                             |
| 0.645611985                                 | 0.012568224                                        | 5.523676487                           | 0.008317225                                             |
| 0.624962289                                 | 0.053862164                                        | 5.485436834                           | 0.026220092                                             |
| 0.61313163                                  | 0.014659821                                        | 6.071613576                           | 0.006398679                                             |
| 0.65841584                                  | 0.017984581                                        | 5.465530029                           | 0.007355156                                             |
| 0.602682188                                 | 0.027556796                                        | 5.371371113                           | 0.011911608                                             |
| 0.59986583                                  | 0.046442449                                        | 5.04761501                            | 0.021786039                                             |
| 0.671903081                                 | 0.022117172                                        | 5.360277847                           | 0.009670613                                             |
| 0.615881212                                 | 0.010990024                                        | 5.834715864                           | 0.004520708                                             |
| 0.711414116                                 | 0.028571575                                        | 4.963580901                           | 0.024824842                                             |
| 0.663510761                                 | 0.016021535                                        | 5.712614134                           | 0.011377018                                             |
| 0.611899766                                 | 0.009222422                                        | 6.140866961                           | 0.004008108                                             |
| 0.639567901                                 | 0.090900949                                        | 4.169925001                           | 0.082110091                                             |
| 0.634132693                                 | 0.017296658                                        | 5.584188492                           | 0.009928745                                             |
| 0.602466893                                 | 0.024844958                                        | 5.749872411                           | 0.013583837                                             |
| 0.614745981                                 | 0.039599087                                        | 5.216853466                           | 0.01796572                                              |
| 0.643790955                                 | 0.010350243                                        | 5.812931892                           | 0.008449668                                             |
| 0.588451241                                 | 0.076522246                                        | 4.106603137                           | 0.066023597                                             |
| 0.9375                                      | 0.135442946                                        | 3.251629167                           | 0.128498502                                             |
| 0.627167368                                 | 0.009292239                                        | 6.082328479                           | 0.006403201                                             |
| 0.618396305                                 | 0.056359987                                        | 5.328856631                           | 0.017684064                                             |
| 0.519443191                                 | 0.056429506                                        | 5.320191026                           | 0.017093442                                             |
| 0.596652486                                 | 0.020055904                                        | 5.768095671                           | 0.012752941                                             |
| 0.626678765                                 | 0.021122277                                        | 5.673000492                           | 0.009249738                                             |
| 0.69747151                                  | 0.033546439                                        | 4.695157347                           | 0.031060599                                             |
| 0.633076045                                 | 0.014853018                                        | 5.740626648                           | 0.00587508                                              |
| 0.519675926                                 | 0.142822788                                        | 3.084962501                           | 0.024899852                                             |
| 0.646609772                                 | 0.026695529                                        | 5.361316956                           | 0.012263634                                             |
| 0.60405438                                  | 0.037848636                                        | 5.481024967                           | 0.029980693                                             |

| log.sigma.4.5.mm.3D_ngtdm_Coarseness | log.sigma.4.5.mm.3D_ngtdm_Complexity | log.sigma.4.5.mm.3D_ngtdm_Strength | log.sigma.4.5.mm.3D_ngtdm_Busyness | log.sigma.4.5.mm.3D_ngtdm_Contrast |
|--------------------------------------|--------------------------------------|------------------------------------|------------------------------------|------------------------------------|
| 0.031183884                          | 0.676560443                          | 4.270611853                        | 0.172074625                        | 0.000396635                        |
| 0.008981014                          | 0.089901606                          | 0.970068937                        | 0.553805054                        | 4.69E-05                           |
| 0.049888934                          | 0.800621943                          | 3.925617888                        | 0.222549304                        | 0.000811056                        |
| 0.005948836                          | 0.256502819                          | 1.559927681                        | 0.380971601                        | 3.89E-05                           |
| 0.087029505                          | 7.582412712                          | 21.68271343                        | 0.042256261                        | 0.002922278                        |
| 0.029645848                          | 0.575004163                          | 2.172938713                        | 0.434556221                        | 0.000653507                        |
| 0.10550554                           | 1.050749106                          | 4.969565196                        | 0.233288421                        | 0.00193681                         |
| 0.021714726                          | 1.289669256                          | 4.611860365                        | 0.272491236                        | 0.000481979                        |
| 0.00895397                           | 0.864998505                          | 4.921169358                        | 0.233133458                        | 0.000155006                        |
| 0.005840003                          | 0.090450752                          | 1.121406578                        | 0.527096022                        | 1.50E-05                           |
| 0.02039616                           | 0.60962305                           | 2.224855787                        | 0.477487645                        | 0.000400859                        |
| 0.015440962                          | 0.354613706                          | 2.639864007                        | 0.308506861                        | 0.000107709                        |
| 0.007922316                          | 0.180918925                          | 1.517699678                        | 0.927870534                        | 5.37E-05                           |
| 0.019152703                          | 0.598157449                          | 3.024281759                        | 0.320624197                        | 0.000246814                        |
| 0.026349054                          | 0.896287716                          | 4.026253189                        | 0.207232571                        | 0.000363041                        |
| 0.001291396                          | 0.011386718                          | 0.507166485                        | 1.446181256                        | 7.42E-07                           |
| 0.033030343                          | 1.699343965                          | 4.862212343                        | 0.180447066                        | 0.001039369                        |
| 0.006594444                          | 0.204684476                          | 1.436424526                        | 0.675360539                        | 3.96E-05                           |
| 0.04337121                           | 3.390882966                          | 8.47328428                         | 0.102110474                        | 0.001860173                        |
| 0.005400504                          | 0.032093913                          | 0.525380569                        | 1.123697761                        | 1.74E-05                           |
| 0.002831268                          | 0.024968555                          | 0.553256899                        | 1.123219579                        | 3.42E-06                           |
| 0.012092759                          | 0.30137942                           | 1.952228717                        | 0.471574326                        | 0.000113331                        |
| 0.004729072                          | 0.049764896                          | 0.903361581                        | 0.618664991                        | 9.02E-06                           |
| 0.071562072                          | 3.112762349                          | 13.16096112                        | 0.057277071                        | 0.002124552                        |
| 0.012341569                          | 0.091765541                          | 1.095824836                        | 0.575901734                        | 4.95E-05                           |
| 0.028646065                          | 0.577687151                          | 2.438659642                        | 0.276298887                        | 0.000457113                        |
| 0.005668733                          | 0.064244508                          | 1.04958896                         | 0.602771044                        | 9.49E-06                           |
| 0.004090702                          | 0.033927862                          | 0.964431109                        | 0.751132236                        | 6.19E-06                           |
| 0.003514998                          | 0.078297523                          | 1.078484058                        | 0.554321448                        | 9.66E-06                           |
| 0.009273211                          | 0.093207882                          | 1.409933692                        | 0.378839708                        | 3.10E-05                           |
| 0.003589377                          | 0.03112176                           | 0.637161865                        | 0.917694451                        | 5.59E-06                           |
| 0.001546138                          | 0.020866983                          | 0.443921364                        | 1.568913129                        | 1.95E-06                           |
| 0.008244368                          | 0.273241618                          | 1.810283068                        | 0.449770577                        | 5.75E-05                           |
| 0.282028031                          | 11.95664179                          | 23.31932844                        | 0.053399802                        | 0.048228393                        |
| 0.07447482                           | 3.172844868                          | 10.07240504                        | 0.067712038                        | 0.001987794                        |
| 0.007261539                          | 0.201846283                          | 1.004109506                        | 0.730238741                        | 6.87E-05                           |
| 0.002072676                          | 0.020803961                          | 0.484787238                        | 1.270873402                        | 3.16E-06                           |
| 0.004811346                          | 0.061830398                          | 0.856981697                        | 0.826567921                        | 1.41E-05                           |
| 0.029136591                          | 1.571771384                          | 6.947383792                        | 0.110153123                        | 0.000512943                        |
| 0.01812915                           | 0.399871251                          | 2.164568851                        | 0.45038323                         | 0.000274794                        |
| 0.016532574                          | 0.32323234                           | 2.971629083                        | 0.196128725                        | 9.06E-05                           |
| 0.023247034                          | 1.24541408                           | 4.881159025                        | 0.217976108                        | 0.000404515                        |
| 0.01024716                           | 0.344780195                          | 1.316446402                        | 0.572779571                        | 0.00012829                         |
| 0.022198837                          | 1.140253375                          | 5.323067565                        | 0.248627242                        | 0.000342325                        |
| 0.009784252                          | 0.284079555                          | 1.817666663                        | 0.539617725                        | 9.11E-05                           |
| 0.002386808                          | 0.006045137                          | 0.250975694                        | 2.296857046                        | 3.13E-06                           |
| 0.004327822                          | 0.400287022                          | 3.80042404                         | 0.402976403                        | 1.62E-05                           |
| 0.034690236                          | 1.020025158                          | 3.596606111                        | 0.322242331                        | 0.000848225                        |
| 0.186789205                          | 7.224198972                          | 10.779026                          | 0.095137177                        | 0.022077114                        |
| 0.045812423                          | 7.060632497                          | 12.82141215                        | 0.060026153                        | 0.002688036                        |
| 0.003554339                          | 0.034126826                          | 0.61733416                         | 0.924848783                        | 6.99E-06                           |
| 0.01805935                           | 0.446322404                          | 1.575980943                        | 0.682175049                        | 0.000345293                        |
| 0.003682007                          | 0.091382437                          | 0.802709297                        | 0.815465232                        | 1.58E-05                           |
| 0.037999387                          | 0.755880058                          | 4.044719242                        | 0.184380134                        | 0.000585545                        |
| 0.001217838                          | 0.008909573                          | 0.245385291                        | 2.444790118                        | 1.56E-06                           |
| 0.02519922                           | 1.302055648                          | 3.96609027                         | 0.189496667                        | 0.000579544                        |
| 0.009609697                          | 0.605245688                          | 2.133277711                        | 0.361722386                        | 0.000125041                        |
| 0.019933707                          | 1.680514242                          | 5.42435772                         | 0.117230078                        | 0.000451986                        |
| 0.030938718                          | 0.616368214                          | 3.980885855                        | 0.224282067                        | 0.000338184                        |
| 0.024307106                          | 0.311187482                          | 2.591704246                        | 0.328501521                        | 0.000210729                        |
| 0.006858673                          | 0.149228657                          | 1.011679353                        | 0.889141064                        | 4.59E-05                           |
| 0.002086264                          | 0.07341369                           | 1.041023376                        | 0.696449282                        | 4.10E-06                           |
| 0.003354995                          | 0.029327175                          | 0.532791985                        | 1.410216012                        | 6.36E-06                           |
| 0.006521643                          | 0.036724735                          | 0.414253646                        | 1.358760612                        | 3.28E-05                           |
| 0.10681452                           | 3.717006478                          | 8.447499658                        | 0.081023387                        | 0.005042869                        |
| 0.009559878                          | 0.29162953                           | 1.914632845                        | 0.354660253                        | 6.15E-05                           |
| 0.0591114123                         | 4.481740067                          | 8.473286406                        | 0.087654228                        | 0.003135191                        |
| 0.003996824                          | 0.07869425                           | 0.816425878                        | 0.823445417                        | 1.84E-05                           |
| 0.04416081                           | 1.895227934                          | 4.869095422                        | 0.195517768                        | 0.001717594                        |
| 0.006535731                          | 0.088303597                          | 0.777830572                        | 0.805696843                        | 3.52E-05                           |
| 0.004578678                          | 0.079429439                          | 0.657820958                        | 0.919538476                        | 2.31E-05                           |
| 0.01585793                           | 0.525460043                          | 2.342552844                        | 0.366296992                        | 0.000189606                        |
| 0.002032367                          | 0.020858852                          | 0.443695058                        | 1.279962583                        | 3.26E-06                           |
| 0.001450426                          | 0.004797219                          | 0.133305497                        | 4.129678077                        | 3.08E-06                           |
| 0.00097045                           | 0.013378857                          | 0.374410158                        | 2.18469524                         | 8.93E-07                           |
| 0.018019572                          | 1.231946166                          | 3.642822905                        | 0.217402723                        | 0.000344225                        |
| 0.018258992                          | 0.470816006                          | 1.992678802                        | 0.468907181                        | 0.00025572                         |
| 0.033232733                          | 1.118746587                          | 4.413781047                        | 0.375506545                        | 0.000790519                        |
| 0.010110973                          | 0.227764047                          | 1.102330707                        | 0.554969251                        | 9.32E-05                           |
| 0.004753032                          | 0.096312648                          | 1.18439091                         | 0.453331322                        | 1.06E-05                           |
| 0.045494586                          | 3.189861149                          | 6.477853566                        | 0.110541209                        | 0.001601469                        |
| 0.01220054                           | 0.468824093                          | 2.447046213                        | 0.279246686                        | 0.000108266                        |
| 0.002710148                          | 0.070027598                          | 1.013144718                        | 0.605384352                        | 4.89E-06                           |
| 0.16543936                           | 4.388877205                          | 9.622230898                        | 0.073887948                        | 0.008499625                        |
| 0.002606027                          | 0.024276089                          | 0.351594535                        | 1.516613678                        | 6.05E-06                           |
| 0.003219607                          | 0.046284157                          | 0.420559748                        | 1.857403855                        | 1.26E-05                           |
| 0.023719144                          | 0.673228091                          | 3.129798173                        | 0.395385763                        | 0.000389896                        |
| 0.012536557                          | 1.776430165                          | 4.183456763                        | 0.15670268                         | 0.000257107                        |
| 0.110316048                          | 1.236594424                          | 3.445203409                        | 0.227531733                        | 0.00388611                         |
| 0.291370938                          | 7.783925049                          | 11.48338267                        | 0.103279321                        | 0.040572965                        |
| 0.003840287                          | 0.113979451                          | 1.333536385                        | 0.430305083                        | 1.08E-05                           |
| 0.028079543                          | 0.881721749                          | 4.242443644                        | 0.514171114                        | 0.000640552                        |
| 0.025638709                          | 0.241344714                          | 1.708911047                        | 0.474928755                        | 0.000237918                        |
| 0.003927183                          | 0.039431377                          | 0.541744633                        | 1.043847954                        | 1.26E-05                           |
| 0.002115124                          | 0.015909009                          | 0.33633101                         | 1.718842817                        | 3.93E-06                           |
| 0.083445251                          | 8.67891495                           | 14.86237685                        | 0.052429587                        | 0.007187197                        |
| 0.015533977                          | 0.628336394                          | 3.010909966                        | 0.248107025                        | 0.000194709                        |
| 0.178837364                          | 2.074961324                          | 4.546672259                        | 0.372778177                        | 0.01797133                         |
| 0.05585015                           | 2.694464552                          | 10.65902404                        | 0.081564024                        | 0.001275308                        |
| 0.034864139                          | 0.834833077                          | 4.648306794                        | 0.136107767                        | 0.000441384                        |

| log.sigma.4.0.mm.3D_gldm_GrayLevelVariance | log.sigma.4.0.mm.3D_gldm_HighGrayLevelEmphasis | log.sigma.4.0.mm.3D_gldm_GrayLevelNonUniformityNormalized | log.sigma.4.0.mm.3D_gldm_DependenceEntropy |
|--------------------------------------------|------------------------------------------------|-----------------------------------------------------------|--------------------------------------------|
| 16.23848804                                | 148.0110803                                    | 0.070264961                                               | 6.312556214                                |
| 9.379195076                                | 125.1831789                                    | 0.099201436                                               | 6.795559244                                |
| 11.16767212                                | 63.05649718                                    | 0.094449232                                               | 5.433675979                                |
| 17.14274818                                | 206.7925504                                    | 0.071722679                                               | 6.989419241                                |
| 36.52798745                                | 183.6336634                                    | 0.051465543                                               | 5.501835369                                |
| 7.521365224                                | 52.91803279                                    | 0.105112873                                               | 5.637060457                                |
| 5.48244898                                 | 34.02857143                                    | 0.130204082                                               | 4.614807753                                |
| 18.25505612                                | 114.2568579                                    | 0.070117723                                               | 6.191781199                                |
| 71.62713396                                | 383.6185637                                    | 0.038124904                                               | 7.079490994                                |
| 8.676710624                                | 155.9133247                                    | 0.099689629                                               | 6.952688341                                |
| 9.216323846                                | 74.28457447                                    | 0.100780896                                               | 5.843662382                                |
| 12.74217039                                | 117.2840159                                    | 0.078982775                                               | 6.630518755                                |
| 9.818544489                                | 63.81844802                                    | 0.101701219                                               | 6.504907928                                |
| 14.63825399                                | 80.62310606                                    | 0.078763487                                               | 6.329809387                                |
| 14.89236656                                | 88.97527473                                    | 0.075670209                                               | 5.882046062                                |
| 4.230264255                                | 168.563816                                     | 0.246262597                                               | 6.810650695                                |
| 18.21814012                                | 100.8018433                                    | 0.069336788                                               | 5.449362119                                |
| 9.77049899                                 | 80.19201031                                    | 0.092213904                                               | 6.718164299                                |
| 29.94831542                                | 131.7142857                                    | 0.052107233                                               | 5.831168528                                |
| 7.895028587                                | 93.54758472                                    | 0.107593219                                               | 7.032768842                                |
| 5.408781577                                | 103.1166502                                    | 0.146351603                                               | 6.800384607                                |
| 13.66911741                                | 86.00330033                                    | 0.084398649                                               | 6.526064786                                |
| 6.93925502                                 | 142.0719178                                    | 0.123482361                                               | 6.917231572                                |
| 35.76561705                                | 264.6165414                                    | 0.05217932                                                | 5.74123615                                 |
| 6.065815972                                | 70.53333333                                    | 0.118194444                                               | 6.618260388                                |
| 10.23250077                                | 75.7781457                                     | 0.088526819                                               | 5.988597213                                |
| 5.670220999                                | 94.60113587                                    | 0.142787671                                               | 6.890544012                                |
| 7.289692424                                | 152.6051348                                    | 0.177271938                                               | 6.813604939                                |
| 11.23658175                                | 188.4359526                                    | 0.142787683                                               | 6.913462266                                |
| 11.44777094                                | 138.6190195                                    | 0.096162964                                               | 6.808486691                                |
| 6.688876913                                | 125.2763628                                    | 0.136083547                                               | 6.880938503                                |
| 5.916383363                                | 142.0706442                                    | 0.172194536                                               | 7.002906383                                |
| 14.88971612                                | 115.1202304                                    | 0.073009624                                               | 6.724648317                                |
| 22                                         | 86                                             | 0.12                                                      | 3.189898095                                |
| 23.92278174                                | 182.5044248                                    | 0.061633644                                               | 5.286918954                                |
| 11.36506409                                | 118.5667166                                    | 0.083660194                                               | 6.495647725                                |
| 6.899564594                                | 143.7731281                                    | 0.176809711                                               | 6.798865163                                |
| 9.478084143                                | 93.5280343                                     | 0.096826463                                               | 7.097237921                                |
| 24.14017721                                | 137.9844237                                    | 0.061887986                                               | 6.089447825                                |
| 14.52745614                                | 99.01675978                                    | 0.073693774                                               | 6.318816091                                |
| 12.15937014                                | 178.5874126                                    | 0.085119077                                               | 6.693201345                                |
| 15.00507712                                | 115.2677165                                    | 0.085153726                                               | 6.080220426                                |
| 10.17760274                                | 89.05097087                                    | 0.089157791                                               | 6.298731043                                |
| 18.0628162                                 | 98.04100228                                    | 0.073437768                                               | 6.237748456                                |
| 16.61339339                                | 115.7542601                                    | 0.075234169                                               | 6.575900182                                |
| 3.801156006                                | 90.09196341                                    | 0.231912615                                               | 6.609043606                                |
| 21.55904503                                | 166.9257101                                    | 0.068772747                                               | 6.807536277                                |
| 11.37140274                                | 52.32017544                                    | 0.094028932                                               | 5.827888701                                |
| 15.03512397                                | 84.22727273                                    | 0.107438017                                               | 3.6412498                                  |
| 40.66766748                                | 255.109589                                     | 0.048132858                                               | 5.574156261                                |
| 7.38496678                                 | 129.1031863                                    | 0.140755839                                               | 6.962248474                                |
| 8.096952755                                | 54.18858561                                    | 0.109913859                                               | 5.795732312                                |
| 11.43855584                                | 149.484507                                     | 0.086854509                                               | 6.923024684                                |
| 12.79774514                                | 77.40167364                                    | 0.077362091                                               | 5.921703941                                |
| 5.476428844                                | 133.3828056                                    | 0.212236785                                               | 6.88057012                                 |
| 18.51583872                                | 117.3253731                                    | 0.06511027                                                | 6.165092352                                |
| 16.81129403                                | 156.5768349                                    | 0.071292926                                               | 6.21335938                                 |
| 31.42236037                                | 226.4454148                                    | 0.051114586                                               | 6.205186849                                |
| 14.19876153                                | 104.8248588                                    | 0.076494622                                               | 6.206140898                                |
| 10.86640019                                | 76.73390558                                    | 0.084354105                                               | 6.424050951                                |
| 9.572237456                                | 87.42405498                                    | 0.09411084                                                | 6.471497301                                |
| 12.88220449                                | 207.6033058                                    | 0.104105887                                               | 7.210385171                                |
| 5.687589185                                | 95.13721159                                    | 0.136801403                                               | 7.085501244                                |
| 6.200205069                                | 90.34118967                                    | 0.119480753                                               | 6.819743333                                |
| 13.74866501                                | 87.77358491                                    | 0.102883588                                               | 4.425664794                                |
| 13.59230023                                | 137.6284722                                    | 0.07810993                                                | 6.65081631                                 |
| 21.22412698                                | 140.7619048                                    | 0.067029478                                               | 5.308865637                                |
| 14.46512068                                | 116.581771                                     | 0.086258846                                               | 7.120475951                                |
| 12.25106362                                | 63.93006993                                    | 0.086507898                                               | 5.49117527                                 |
| 9.632408921                                | 108.6082589                                    | 0.090110935                                               | 6.879616167                                |
| 10.49166393                                | 147.8114659                                    | 0.087899407                                               | 6.945566128                                |
| 10.49220347                                | 84.5978836                                     | 0.090525648                                               | 6.317902476                                |
| 7.135697701                                | 138.4535922                                    | 0.145879976                                               | 6.930199297                                |
| 5.776667955                                | 83.68165036                                    | 0.172865942                                               | 6.89578437                                 |
| 6.0769503                                  | 166.3132447                                    | 0.197705095                                               | 7.035562736                                |
| 16.61574232                                | 137.9753363                                    | 0.070482013                                               | 6.262264709                                |
| 9.301241728                                | 82.18640351                                    | 0.096241151                                               | 6.062980248                                |
| 9.224948182                                | 37.02232143                                    | 0.107621173                                               | 5.574633107                                |
| 10.45381486                                | 134.7042716                                    | 0.089152788                                               | 6.518706539                                |
| 8.665237206                                | 180.029216                                     | 0.111570411                                               | 6.861390806                                |
| 17.70109455                                | 121.2214765                                    | 0.068960858                                               | 5.272855061                                |
| 17.4057055                                 | 194.8034682                                    | 0.06976912                                                | 6.659752135                                |
| 10.18994675                                | 256.4996957                                    | 0.11818276                                                | 7.187238314                                |
| 14.37044745                                | 97.70967742                                    | 0.090530697                                               | 4.018081794                                |
| 6.209815354                                | 93.68621524                                    | 0.134019353                                               | 7.028931208                                |
| 6.837791117                                | 88.88822355                                    | 0.111124608                                               | 6.880431593                                |
| 10.99535372                                | 77.33972603                                    | 0.092272471                                               | 5.908203224                                |
| 23.25796363                                | 204.8896435                                    | 0.05956111                                                | 6.21004018                                 |
| 4.8084                                     | 34.62                                          | 0.1408                                                    | 4.50597913                                 |
| 9.289940828                                | 49.07692308                                    | 0.147928994                                               | 3.085055103                                |
| 12.9607944                                 | 192.8366871                                    | 0.100044472                                               | 7.112983858                                |
| 15.8742642                                 | 69.68421053                                    | 0.085028566                                               | 6.103470922                                |
| 8.825813609                                | 75.625                                         | 0.09522929                                                | 6.26078809                                 |
| 9.17691097                                 | 119.7606791                                    | 0.095856492                                               | 7.14807333                                 |
| 7.054830252                                | 119.05054                                      | 0.148950662                                               | 6.992674118                                |
| 26.96800202                                | 195.555556                                     | 0.073318216                                               | 4.913477542                                |
| 14.59752388                                | 142.2764706                                    | 0.065004325                                               | 6.462868381                                |
| 9.901041667                                | 41.54166667                                    | 0.149305556                                               | 3.522055209                                |
| 28.02243216                                | 216.7055215                                    | 0.059279612                                               | 5.579201106                                |
| 13.25158163                                | 140.1357143                                    | 0.083035714                                               | 6.161805601                                |

|                                                  |                                                 |                                                  |
|--------------------------------------------------|-------------------------------------------------|--------------------------------------------------|
| log.sigma.4.0.mm.3D_gldm_DependenceNonUniformity | log.sigma.4.0.mm.3D_gldm_GrayLevelNonUniformity | log.sigma.4.0.mm.3D_gldm_SmallDependenceEmphasis |
| 55.86426593                                      | 25.36565097                                     | 0.228102494                                      |
| 130.233072                                       | 139.1796151                                     | 0.12473516                                       |
| 36.06214689                                      | 16.71751412                                     | 0.256163196                                      |
| 239.3952406                                      | 138.6399379                                     | 0.226912625                                      |
| 32.92079208                                      | 5.198019802                                     | 0.545706821                                      |
| 33.81147541                                      | 25.64754098                                     | 0.248132982                                      |
| 17.48571429                                      | 9.114285714                                     | 0.319793651                                      |
| 75.33915212                                      | 28.11720698                                     | 0.300709657                                      |
| 301.3360434                                      | 56.27235772                                     | 0.327423377                                      |
| 206.2600259                                      | 231.1802501                                     | 0.120521901                                      |
| 58.55851064                                      | 37.89361702                                     | 0.266898516                                      |
| 100.014531                                       | 59.78996037                                     | 0.196526464                                      |
| 151.0395315                                      | 138.9238653                                     | 0.160457395                                      |
| 73.59469697                                      | 41.58712121                                     | 0.255044563                                      |
| 74.31868132                                      | 27.54395604                                     | 0.323784535                                      |
| 412.4977835                                      | 2666.5314                                       | 0.044735857                                      |
| 61.70967742                                      | 15.04608295                                     | 0.413156682                                      |
| 169.5412371                                      | 143.1159794                                     | 0.170515775                                      |
| 46.42857143                                      | 9.483516484                                     | 0.427776158                                      |
| 190.7887527                                      | 298.4635905                                     | 0.077406095                                      |
| 289.2175369                                      | 742.7343842                                     | 0.069472988                                      |
| 127.1452145                                      | 76.71837184                                     | 0.218187991                                      |
| 191.339726                                       | 360.5684932                                     | 0.090070324                                      |
| 37.06015038                                      | 6.939849624                                     | 0.480931495                                      |
| 85.86875                                         | 113.4666667                                     | 0.12967414                                       |
| 48.36423841                                      | 26.73509934                                     | 0.23974656                                       |
| 150.08519                                        | 326.8409786                                     | 0.096976348                                      |
| 191.9961489                                      | 690.4741977                                     | 0.071042108                                      |
| 240.9133477                                      | 530.5990312                                     | 0.119414466                                      |
| 149.8541051                                      | 162.8038984                                     | 0.108640798                                      |
| 256.7267317                                      | 571.6869793                                     | 0.076362369                                      |
| 398.7070078                                      | 1520.994339                                     | 0.080905285                                      |
| 187.6177106                                      | 101.4103672                                     | 0.191778279                                      |
| 5.4                                              | 1.8                                             | 0.522222222                                      |
| 33.44247788                                      | 6.96460177                                      | 0.4748353                                        |
| 178.8470765                                      | 111.6026987                                     | 0.206076677                                      |
| 315.9053953                                      | 1183.033777                                     | 0.069090223                                      |
| 228.4228232                                      | 293.5778364                                     | 0.109221016                                      |
| 69.87850467                                      | 19.86604361                                     | 0.289956167                                      |
| 86.0018622                                       | 39.5735568                                      | 0.21571206                                       |
| 83.77762238                                      | 60.86013986                                     | 0.167109024                                      |
| 62.95800525                                      | 32.44356955                                     | 0.298817489                                      |
| 124.1674757                                      | 73.46601942                                     | 0.25509318                                       |
| 71.77904328                                      | 32.23917995                                     | 0.297971022                                      |
| 173.993722                                       | 83.88609865                                     | 0.220530443                                      |
| 250.8703038                                      | 1419.76903                                      | 0.032932339                                      |
| 423.1427531                                      | 188.8499636                                     | 0.245057969                                      |
| 34.96491228                                      | 21.43859649                                     | 0.312070039                                      |
| 7.363636364                                      | 2.363636364                                     | 0.516414141                                      |
| 49.45205479                                      | 7.02739726                                      | 0.544425419                                      |
| 230.8813725                                      | 574.2838235                                     | 0.087703319                                      |
| 54.89578164                                      | 44.29528536                                     | 0.257995004                                      |
| 325.3974961                                      | 277.5001565                                     | 0.149026926                                      |
| 39.62761506                                      | 18.48953975                                     | 0.195396736                                      |
| 459.860605                                       | 2399.549089                                     | 0.055502509                                      |
| 69.16716418                                      | 21.8119403                                      | 0.356248242                                      |
| 185.1077982                                      | 62.16743119                                     | 0.368938356                                      |
| 121.7598253                                      | 23.41048035                                     | 0.418884606                                      |
| 57.27118644                                      | 27.07909605                                     | 0.255698701                                      |
| 59.01716738                                      | 39.30901288                                     | 0.146367812                                      |
| 170.9587629                                      | 136.9312715                                     | 0.168286853                                      |
| 449.3881346                                      | 705.4214876                                     | 0.130245277                                      |
| 229.5360825                                      | 557.3289151                                     | 0.083263097                                      |
| 135.4377104                                      | 212.9147026                                     | 0.100254308                                      |
| 15.86792453                                      | 5.452830189                                     | 0.398553459                                      |
| 151.5069444                                      | 89.98263889                                     | 0.209034653                                      |
| 27.43809524                                      | 7.038095238                                     | 0.449968254                                      |
| 281.2520911                                      | 299.0594174                                     | 0.133362073                                      |
| 28.21678322                                      | 12.37062937                                     | 0.420230611                                      |
| 173.8102679                                      | 161.4787946                                     | 0.149264134                                      |
| 248.3066564                                      | 228.4505579                                     | 0.153783634                                      |
| 77.42680776                                      | 51.32804233                                     | 0.230967062                                      |
| 347.2635681                                      | 1029.474989                                     | 0.069293497                                      |
| 484.8290567                                      | 1872.82961                                      | 0.051744567                                      |
| 584.9206557                                      | 2870.480267                                     | 0.068483994                                      |
| 88.23318386                                      | 31.43497758                                     | 0.304783527                                      |
| 65.92105263                                      | 43.88596491                                     | 0.259017904                                      |
| 34.13392857                                      | 24.10714286                                     | 0.298728824                                      |
| 119.4797371                                      | 81.39649507                                     | 0.234521858                                      |
| 196.5340237                                      | 301.6863905                                     | 0.121819862                                      |
| 40.31543624                                      | 10.27516779                                     | 0.421772931                                      |
| 132.8520231                                      | 60.35028902                                     | 0.279841123                                      |
| 319.7786569                                      | 582.5228241                                     | 0.117480341                                      |
| 12.5483871                                       | 2.806451613                                     | 0.634408602                                      |
| 289.5126965                                      | 665.0040306                                     | 0.085934462                                      |
| 311.9649273                                      | 389.7140006                                     | 0.146122364                                      |
| 57.69041096                                      | 33.67945205                                     | 0.269446758                                      |
| 135.4787776                                      | 35.08149406                                     | 0.391514494                                      |
| 10.16                                            | 7.04                                            | 0.358153997                                      |
| 5.615384615                                      | 1.923076923                                     | 0.585470085                                      |
| 268.8314377                                      | 343.0524934                                     | 0.143669254                                      |
| 47.17763158                                      | 25.84868421                                     | 0.28105961                                       |
| 54.375                                           | 39.61538462                                     | 0.200804621                                      |
| 270.5306681                                      | 350.067908                                      | 0.094197794                                      |
| 364.6410966                                      | 1075.721684                                     | 0.067374382                                      |
| 20.33333333                                      | 4.619047619                                     | 0.498844797                                      |
| 116.5382353                                      | 44.20294118                                     | 0.275802696                                      |
| 5.916666667                                      | 3.583333333                                     | 0.395115741                                      |
| 47.52760736                                      | 9.662576687                                     | 0.501271302                                      |
| 45.17857143                                      | 23.25                                           | 0.259435049                                      |

| log.sigma.4.0.mm.3D_gldm_DependenceNonUniformityNormalized | log.sigma.4.0.mm.3D_gldm_DependenceVariance | log.sigma.4.0.mm.3D_gldm_LargeDependenceEmphasis |
|------------------------------------------------------------|---------------------------------------------|--------------------------------------------------|
| 0.154748659                                                | 3.575509703                                 | 16.52354571                                      |
| 0.092824713                                                | 23.31760523                                 | 62.91874555                                      |
| 0.203740943                                                | 1.943502825                                 | 10.94350282                                      |
| 0.123846477                                                | 13.4222935                                  | 33.38696327                                      |
| 0.325948436                                                | 0.968336438                                 | 4.544554455                                      |
| 0.138571621                                                | 5.904797098                                 | 20.55737705                                      |
| 0.249795918                                                | 1.347755102                                 | 8.257142857                                      |
| 0.187878185                                                | 3.260253357                                 | 12.50124688                                      |
| 0.204157211                                                | 2.486883175                                 | 10.32384824                                      |
| 0.088943521                                                | 15.85147834                                 | 52.89909444                                      |
| 0.15574072                                                 | 5.543090765                                 | 18.28191489                                      |
| 0.132119592                                                | 5.328162164                                 | 22.02245707                                      |
| 0.110570667                                                | 8.146290695                                 | 31.42020498                                      |
| 0.139383896                                                | 6.104281451                                 | 20.625                                           |
| 0.204172201                                                | 2.474006762                                 | 10.35714286                                      |
| 0.038095473                                                | 58.77951623                                 | 248.8719985                                      |
| 0.284376394                                                | 1.187411073                                 | 6.059907834                                      |
| 0.109240488                                                | 8.009816067                                 | 31.10180412                                      |
| 0.255102041                                                | 1.652578191                                 | 6.978021978                                      |
| 0.068777488                                                | 27.11616623                                 | 89.36337419                                      |
| 0.056988677                                                | 41.60047819                                 | 130.4872906                                      |
| 0.139873723                                                | 7.553137492                                 | 23.84488449                                      |
| 0.065527303                                                | 29.97074076                                 | 94.6630137                                       |
| 0.278647747                                                | 1.701509413                                 | 6.488721805                                      |
| 0.089446615                                                | 11.62860677                                 | 46.80833333                                      |
| 0.160146485                                                | 3.366738301                                 | 15.27152318                                      |
| 0.065568017                                                | 29.9120912                                  | 92.21100917                                      |
| 0.049292978                                                | 54.71681538                                 | 167.0985879                                      |
| 0.064831364                                                | 53.9285987                                  | 132.4198062                                      |
| 0.088513943                                                | 32.08623605                                 | 81.10277614                                      |
| 0.061110862                                                | 43.13283135                                 | 126.6196144                                      |
| 0.045138346                                                | 53.9468393                                  | 170.002151                                       |
| 0.135073946                                                | 11.77647991                                 | 30.96832253                                      |
| 0.36                                                       | 0.56                                        | 3.8                                              |
| 0.295951132                                                | 0.998042133                                 | 5.17699115                                       |
| 0.134068273                                                | 6.092355621                                 | 22.57571214                                      |
| 0.04721348                                                 | 52.16847477                                 | 172.5839187                                      |
| 0.075337343                                                | 27.56967196                                 | 79.07585752                                      |
| 0.217690046                                                | 2.070981454                                 | 9.984423676                                      |
| 0.160152444                                                | 3.552892301                                 | 16.27001862                                      |
| 0.1171715                                                  | 7.167986699                                 | 28.22517483                                      |
| 0.165244108                                                | 5.450072678                                 | 17.11023622                                      |
| 0.150688684                                                | 5.248562541                                 | 18.3276699                                       |
| 0.163505793                                                | 4.440439807                                 | 15.45558087                                      |
| 0.156048181                                                | 4.003117698                                 | 17.08609865                                      |
| 0.040978488                                                | 50.18152483                                 | 218.096047                                       |
| 0.154094229                                                | 4.277585778                                 | 16.86380189                                      |
| 0.153354878                                                | 6.464373653                                 | 19.21052632                                      |
| 0.334710744                                                | 1.181818182                                 | 5.181818182                                      |
| 0.338712704                                                | 0.767498593                                 | 4.136986301                                      |
| 0.056588572                                                | 50.51288711                                 | 139.9544118                                      |
| 0.13621782                                                 | 5.39252135                                  | 20.05210918                                      |
| 0.101845852                                                | 15.92258346                                 | 46.11236307                                      |
| 0.165805921                                                | 2.794944066                                 | 15.65271967                                      |
| 0.040674032                                                | 58.30236883                                 | 209.9324253                                      |
| 0.206469147                                                | 3.011218534                                 | 10.70149254                                      |
| 0.212279585                                                | 3.032799217                                 | 10.41972477                                      |
| 0.265851147                                                | 1.326690948                                 | 6.384279476                                      |
| 0.161783013                                                | 3.254811836                                 | 14.74576271                                      |
| 0.126646282                                                | 5.284330159                                 | 25.51502146                                      |
| 0.117497432                                                | 7.956538066                                 | 30.1532646                                       |
| 0.066320563                                                | 40.12041031                                 | 104.1818182                                      |
| 0.056341699                                                | 34.49632607                                 | 113.8610702                                      |
| 0.076003205                                                | 25.29282726                                 | 76.00448934                                      |
| 0.299394802                                                | 0.933428266                                 | 5.641509434                                      |
| 0.131516445                                                | 6.088249301                                 | 22.77604167                                      |
| 0.261315193                                                | 1.30521542                                  | 6.314285714                                      |
| 0.081122611                                                | 32.63369614                                 | 80.08739544                                      |
| 0.197320162                                                | 6.585554306                                 | 16.35664336                                      |
| 0.096992337                                                | 14.48396519                                 | 45.16517857                                      |
| 0.095539306                                                | 13.91317494                                 | 44.41977684                                      |
| 0.136555217                                                | 4.981949616                                 | 20.29805996                                      |
| 0.049208384                                                | 48.20004996                                 | 154.9387842                                      |
| 0.044750697                                                | 53.87095763                                 | 189.0732878                                      |
| 0.040286566                                                | 58.62635504                                 | 202.284386                                       |
| 0.197832251                                                | 6.152124515                                 | 16.66367713                                      |
| 0.144563712                                                | 5.950580948                                 | 19.94736842                                      |
| 0.15238361                                                 | 4.714285714                                 | 16.96428571                                      |
| 0.130864991                                                | 5.432860387                                 | 21.19715225                                      |
| 0.072682701                                                | 39.30667037                                 | 97.41346154                                      |
| 0.270573398                                                | 1.421557587                                 | 6.476510067                                      |
| 0.153586154                                                | 4.982920913                                 | 17.19653179                                      |
| 0.064876985                                                | 39.37388935                                 | 104.8068574                                      |
| 0.404786681                                                | 0.616024974                                 | 3.322580645                                      |
| 0.058345969                                                | 39.98464509                                 | 118.0515921                                      |
| 0.088954927                                                | 13.93913497                                 | 46.928714                                        |
| 0.15805592                                                 | 4.002807281                                 | 15.71232877                                      |
| 0.230014903                                                | 2.431337394                                 | 8.908319185                                      |
| 0.2032                                                     | 2.88                                        | 10.72                                            |
| 0.431952663                                                | 0.390532544                                 | 3                                                |
| 0.078399369                                                | 39.2884728                                  | 92.41382327                                      |
| 0.155189578                                                | 4.492728532                                 | 16.55921053                                      |
| 0.130709135                                                | 7.232040496                                 | 25.00961538                                      |
| 0.074077401                                                | 27.15597629                                 | 82.31872946                                      |
| 0.050490321                                                | 50.95116279                                 | 159.7607311                                      |
| 0.322751323                                                | 0.965986395                                 | 4.777777778                                      |
| 0.171379758                                                | 3.240865052                                 | 13.59411765                                      |
| 0.246527778                                                | 1.493055556                                 | 7.333333333                                      |
| 0.291580413                                                | 1.314464225                                 | 5.588957055                                      |
| 0.161352041                                                | 3.79                                        | 15.35                                            |

|                                                              |                                                               |                                                               |
|--------------------------------------------------------------|---------------------------------------------------------------|---------------------------------------------------------------|
| log.sigma.4.0.mm.3D_gldm_LargeDependenceLowGrayLevelEmphasis | log.sigma.4.0.mm.3D_gldm_SmallDependenceHighGrayLevelEmphasis | log.sigma.4.0.mm.3D_gldm_LargeDependenceHighGrayLevelEmphasis |
| 0.220799177                                                  | 38.66043741                                                   | 2205.34626                                                    |
| 0.490032316                                                  | 15.91616915                                                   | 10607.13471                                                   |
| 0.738744196                                                  | 22.84768352                                                   | 493.7344633                                                   |
| 0.194601505                                                  | 58.96020902                                                   | 7655.318158                                                   |
| 0.121319215                                                  | 117.4676265                                                   | 583.6930693                                                   |
| 1.123726793                                                  | 21.2464047                                                    | 576.4508197                                                   |
| 0.965688855                                                  | 12.29297619                                                   | 238.8857143                                                   |
| 0.329489663                                                  | 48.88019936                                                   | 936.9650873                                                   |
| 0.076171214                                                  | 125.7043044                                                   | 4780.759485                                                   |
| 0.360673733                                                  | 21.89286098                                                   | 9209.620957                                                   |
| 0.479877561                                                  | 28.96119563                                                   | 917.7898936                                                   |
| 0.360300067                                                  | 28.61567993                                                   | 2479.054161                                                   |
| 0.99019331                                                   | 17.37732872                                                   | 1716.383602                                                   |
| 0.988477521                                                  | 33.82267772                                                   | 896.7215909                                                   |
| 0.649929948                                                  | 41.46533189                                                   | 549.8873626                                                   |
| 1.446035038                                                  | 7.544772748                                                   | 44282.58967                                                   |
| 0.398769883                                                  | 52.41875192                                                   | 412.4423963                                                   |
| 0.749727549                                                  | 20.43884066                                                   | 2387.532216                                                   |
| 1.611971094                                                  | 79.31060888                                                   | 512.1868132                                                   |
| 1.037001305                                                  | 7.024799665                                                   | 10759.77037                                                   |
| 1.122643655                                                  | 7.244429406                                                   | 17105.59744                                                   |
| 0.672204697                                                  | 28.34910138                                                   | 1519.664466                                                   |
| 0.621455762                                                  | 12.95284685                                                   | 16859.60685                                                   |
| 0.096901794                                                  | 125.7778467                                                   | 1770.721805                                                   |
| 0.935958722                                                  | 10.92669096                                                   | 3766.6                                                        |
| 0.550840922                                                  | 24.01344344                                                   | 1053.102649                                                   |
| 1.021966508                                                  | 11.30995986                                                   | 9795.889035                                                   |
| 0.953956166                                                  | 9.592108233                                                   | 31555.25263                                                   |
| 0.594917353                                                  | 21.1997388                                                    | 32591.65231                                                   |
| 0.524892438                                                  | 13.10222601                                                   | 16138.46663                                                   |
| 0.896456109                                                  | 10.26175524                                                   | 20077.68484                                                   |
| 1.120406433                                                  | 12.83067659                                                   | 27814.10076                                                   |
| 0.459578357                                                  | 29.17057732                                                   | 4497.835853                                                   |
| 0.217904538                                                  | 44.25555556                                                   | 267.2                                                         |
| 0.07108845                                                   | 103.6703663                                                   | 788.380531                                                    |
| 0.293285236                                                  | 32.18354926                                                   | 2798.088456                                                   |
| 1.050898304                                                  | 8.314675946                                                   | 30420.61037                                                   |
| 1.05245503                                                   | 13.08132126                                                   | 8955.564314                                                   |
| 0.542364733                                                  | 50.95968236                                                   | 1000.632399                                                   |
| 0.399632119                                                  | 23.56222025                                                   | 1502.882682                                                   |
| 0.188775036                                                  | 29.43262409                                                   | 5668.721678                                                   |
| 0.302062934                                                  | 52.35977424                                                   | 1258.627297                                                   |
| 0.424237572                                                  | 31.47943364                                                   | 1290.580097                                                   |
| 0.595782036                                                  | 45.5440812                                                    | 837.3667426                                                   |
| 0.334782798                                                  | 33.20514139                                                   | 1567.133632                                                   |
| 2.207278817                                                  | 2.262755396                                                   | 23260.80546                                                   |
| 0.208160792                                                  | 57.21684003                                                   | 2143.442826                                                   |
| 1.973542836                                                  | 27.20209828                                                   | 470.1622807                                                   |
| 0.508917888                                                  | 62.24368687                                                   | 236.2272727                                                   |
| 0.132053732                                                  | 160.3615868                                                   | 822.7260274                                                   |
| 0.95829748                                                   | 11.11673204                                                   | 22632.34779                                                   |
| 0.986408813                                                  | 22.86072316                                                   | 647.6476427                                                   |
| 0.327772894                                                  | 23.70814762                                                   | 8838.584977                                                   |
| 2.082264245                                                  | 18.20069181                                                   | 1007.334728                                                   |
| 1.496970484                                                  | 6.745509596                                                   | 31294.31594                                                   |
| 0.333343534                                                  | 54.6667447                                                    | 927.838806                                                    |
| 0.134631854                                                  | 74.60332704                                                   | 1147.879587                                                   |
| 0.242956585                                                  | 111.7698987                                                   | 1180.069869                                                   |
| 0.327199741                                                  | 36.37274001                                                   | 1282.40113                                                    |
| 0.873910333                                                  | 15.3676155                                                    | 1630.819742                                                   |
| 0.502443345                                                  | 17.62523417                                                   | 3311.149141                                                   |
| 0.463311241                                                  | 31.1117251                                                    | 26426.18418                                                   |
| 1.253294121                                                  | 8.653356669                                                   | 11967.57413                                                   |
| 0.852632106                                                  | 8.480439945                                                   | 8591.383838                                                   |
| 0.29596356                                                   | 42.9857652                                                    | 459.6226415                                                   |
| 0.294253068                                                  | 34.41032687                                                   | 3494.789931                                                   |
| 0.333775957                                                  | 83.23428042                                                   | 634.2095238                                                   |
| 0.851252434                                                  | 15.84165906                                                   | 13437.46149                                                   |
| 1.215238389                                                  | 40.71565118                                                   | 390.4755245                                                   |
| 0.481225217                                                  | 17.52876105                                                   | 6339.127232                                                   |
| 0.341143967                                                  | 24.87580372                                                   | 8214.404771                                                   |
| 0.519214885                                                  | 28.61869702                                                   | 1479.119929                                                   |
| 0.986268113                                                  | 8.980270871                                                   | 27057.94686                                                   |
| 2.174272474                                                  | 3.560272354                                                   | 19469.60024                                                   |
| 1.153296129                                                  | 12.68905515                                                   | 37092.76713                                                   |
| 0.283489563                                                  | 55.14197305                                                   | 1508.988789                                                   |
| 0.465331846                                                  | 30.27613793                                                   | 1183.164474                                                   |
| 2.512681988                                                  | 21.17301373                                                   | 282.5223214                                                   |
| 0.223474629                                                  | 36.69330403                                                   | 2903.208105                                                   |
| 0.460595574                                                  | 23.57831264                                                   | 22653.348                                                     |
| 0.200331994                                                  | 67.74653617                                                   | 503.5973154                                                   |
| 0.129793082                                                  | 64.91191936                                                   | 3174.810405                                                   |
| 0.371395643                                                  | 31.1038165                                                    | 31494.1617                                                    |
| 0.097369174                                                  | 63.83870968                                                   | 310.6129032                                                   |
| 1.217795685                                                  | 8.886956553                                                   | 13805.9611                                                    |
| 0.717326933                                                  | 18.11748892                                                   | 3961.923296                                                   |
| 0.470497764                                                  | 30.75223151                                                   | 839.0273973                                                   |
| 0.117699662                                                  | 100.3914529                                                   | 1295.473684                                                   |
| 0.869210692                                                  | 15.99352486                                                   | 218.38                                                        |
| 0.204555481                                                  | 35.86752137                                                   | 107.3846154                                                   |
| 0.429783713                                                  | 27.92966735                                                   | 23705.37737                                                   |
| 1.084082712                                                  | 27.6958756                                                    | 690.4539474                                                   |
| 0.558602543                                                  | 17.59205594                                                   | 2038.596154                                                   |
| 0.665556493                                                  | 10.47859145                                                   | 13076.7897                                                    |
| 1.230685397                                                  | 8.034871844                                                   | 22875.64456                                                   |
| 0.068937521                                                  | 95.55891534                                                   | 795.9365079                                                   |
| 0.409573763                                                  | 54.52321745                                                   | 1428.132353                                                   |
| 1.354571053                                                  | 20.12907407                                                   | 225.625                                                       |
| 0.066128228                                                  | 112.758819                                                    | 1184.472393                                                   |
| 0.162506088                                                  | 39.44126036                                                   | 2201.842857                                                   |

| log.sigma.4.0.mm.3D_gldm_SmallDependenceLowGrayLevelEmphasis | log.sigma.4.0.mm.3D_gldm_LowGrayLevelEmphasis | log.sigma.4.0.mm.3D_gldm_DistanceZoneVariabilityNormalized |
|--------------------------------------------------------------|-----------------------------------------------|------------------------------------------------------------|
| 0.005441635                                                  | 0.016103984                                   | 0.958781163                                                |
| 0.002774749                                                  | 0.01542097                                    | 0.952186199                                                |
| 0.008373406                                                  | 0.05688948                                    | 0.964297521                                                |
| 0.002171817                                                  | 0.008371749                                   | 0.876994042                                                |
| 0.018499076                                                  | 0.028256461                                   | 0.909297052                                                |
| 0.009110023                                                  | 0.042821365                                   | 1                                                          |
| 0.021583007                                                  | 0.100035759                                   | 1                                                          |
| 0.007135569                                                  | 0.030247359                                   | 0.972608025                                                |
| 0.002845129                                                  | 0.008254515                                   | 0.534429263                                                |
| 0.001552136                                                  | 0.009436892                                   | 0.948203627                                                |
| 0.007644095                                                  | 0.028247624                                   | 0.901096408                                                |
| 0.003943168                                                  | 0.021617279                                   | 0.987097318                                                |
| 0.006763339                                                  | 0.037663692                                   | 0.933961575                                                |
| 0.005039005                                                  | 0.038900305                                   | 0.973943906                                                |
| 0.007900495                                                  | 0.034935308                                   | 0.972227733                                                |
| 0.000479154                                                  | 0.007770454                                   | 0.981144318                                                |
| 0.011862419                                                  | 0.050021258                                   | 0.981983471                                                |
| 0.003560684                                                  | 0.029470314                                   | 0.933412604                                                |
| 0.00819724                                                   | 0.066816079                                   | 1                                                          |
| 0.00178011                                                   | 0.01854453                                    | 0.911791239                                                |
| 0.001584032                                                  | 0.014354024                                   | 0.987159209                                                |
| 0.00607981                                                   | 0.031636363                                   | 0.982457514                                                |
| 0.001802086                                                  | 0.011063073                                   | 0.991902968                                                |
| 0.011772863                                                  | 0.019681402                                   | 1                                                          |
| 0.004068884                                                  | 0.031797205                                   | 1                                                          |
| 0.009933758                                                  | 0.040772518                                   | 0.976193932                                                |
| 0.001767165                                                  | 0.01789402                                    | 1                                                          |
| 0.001186294                                                  | 0.009279173                                   | 0.975907198                                                |
| 0.001538239                                                  | 0.008555702                                   | 0.955756432                                                |
| 0.003733344                                                  | 0.014756398                                   | 0.953573054                                                |
| 0.00138483                                                   | 0.011793317                                   | 0.948470801                                                |
| 0.001078772                                                  | 0.009713324                                   | 0.952268516                                                |
| 0.004214062                                                  | 0.025340054                                   | 0.935567326                                                |
| 0.090566103                                                  | 0.104922679                                   | 1                                                          |
| 0.016214137                                                  | 0.022258403                                   | 0.969704142                                                |
| 0.003325766                                                  | 0.015493                                      | 0.885478132                                                |
| 0.001154567                                                  | 0.010097268                                   | 0.88637006                                                 |
| 0.002069391                                                  | 0.021609217                                   | 0.930255308                                                |
| 0.00633013                                                   | 0.039699471                                   | 0.933961575                                                |
| 0.008610302                                                  | 0.027237831                                   | 0.908608                                                   |
| 0.003302342                                                  | 0.010353853                                   | 0.98449707                                                 |
| 0.00612826                                                   | 0.019086653                                   | 0.930645412                                                |
| 0.00471891                                                   | 0.024485122                                   | 0.950265728                                                |
| 0.006889229                                                  | 0.03892278                                    | 0.960622222                                                |
| 0.003750391                                                  | 0.020937242                                   | 0.795117863                                                |
| 0.000868638                                                  | 0.015150374                                   | 1                                                          |
| 0.002466518                                                  | 0.011933465                                   | 0.657166883                                                |
| 0.010737102                                                  | 0.079844628                                   | 0.953514739                                                |
| 0.028172743                                                  | 0.107326822                                   | 1                                                          |
| 0.007074515                                                  | 0.025079546                                   | 0.938207334                                                |
| 0.001759761                                                  | 0.011903684                                   | 0.987302106                                                |
| 0.006741061                                                  | 0.044651882                                   | 0.872890333                                                |
| 0.002182683                                                  | 0.012157921                                   | 0.882045201                                                |
| 0.005329936                                                  | 0.061018233                                   | 0.962976148                                                |
| 0.000818093                                                  | 0.010265321                                   | 0.92986277                                                 |
| 0.007056787                                                  | 0.031629929                                   | 0.971836735                                                |
| 0.005186797                                                  | 0.01274711                                    | 0.963267465                                                |
| 0.004993368                                                  | 0.022991354                                   | 0.941719317                                                |
| 0.005923063                                                  | 0.026264618                                   | 0.9802                                                     |
| 0.003915354                                                  | 0.034236339                                   | 1                                                          |
| 0.004570165                                                  | 0.021836778                                   | 0.834710744                                                |
| 0.001075054                                                  | 0.007560685                                   | 0.909189137                                                |
| 0.001481652                                                  | 0.015962081                                   | 0.993103531                                                |
| 0.002481116                                                  | 0.017198538                                   | 0.963867665                                                |
| 0.017708842                                                  | 0.065462072                                   | 1                                                          |
| 0.003303308                                                  | 0.017716529                                   | 0.876900427                                                |
| 0.010342477                                                  | 0.041291019                                   | 0.965527855                                                |
| 0.002819757                                                  | 0.025138848                                   | 0.817322335                                                |
| 0.014596866                                                  | 0.050833241                                   | 0.971020761                                                |
| 0.003170386                                                  | 0.017243242                                   | 0.929173875                                                |
| 0.001727607                                                  | 0.011335739                                   | 0.9655375                                                  |
| 0.004825499                                                  | 0.026718867                                   | 0.931122449                                                |
| 0.000847722                                                  | 0.010277707                                   | 0.942774414                                                |
| 0.001955007                                                  | 0.022675869                                   | 0.963509516                                                |
| 0.000701356                                                  | 0.007772068                                   | 0.922723607                                                |
| 0.006645093                                                  | 0.021637386                                   | 0.988024387                                                |
| 0.006849003                                                  | 0.024093018                                   | 0.985075471                                                |
| 0.017505454                                                  | 0.123749268                                   | 0.972978045                                                |
| 0.003789516                                                  | 0.01535914                                    | 0.940982987                                                |
| 0.001388622                                                  | 0.007791144                                   | 0.969902588                                                |
| 0.009163672                                                  | 0.032422857                                   | 1                                                          |
| 0.003872335                                                  | 0.009775789                                   | 0.978263495                                                |
| 0.000909018                                                  | 0.005208764                                   | 0.883760566                                                |
| 0.048823591                                                  | 0.05554585                                    | 1                                                          |
| 0.00204334                                                   | 0.018572859                                   | 0.948167744                                                |
| 0.002612353                                                  | 0.017527329                                   | 0.988461927                                                |
| 0.007924881                                                  | 0.029271074                                   | 0.945497423                                                |
| 0.004297668                                                  | 0.014031015                                   | 0.964923469                                                |
| 0.04931962                                                   | 0.085096633                                   | 1                                                          |
| 0.0936714                                                    | 0.111574712                                   | 0.654320988                                                |
| 0.001502122                                                  | 0.00953202                                    | 0.885676972                                                |
| 0.01302195                                                   | 0.051809371                                   | 0.978949751                                                |
| 0.00721964                                                   | 0.02861255                                    | 0.959201389                                                |
| 0.002381496                                                  | 0.015316468                                   | 0.969238281                                                |
| 0.001217342                                                  | 0.012496538                                   | 0.956340065                                                |
| 0.020798995                                                  | 0.025217724                                   | 1                                                          |
| 0.003336374                                                  | 0.022464863                                   | 0.91604997                                                 |
| 0.032400277                                                  | 0.152695479                                   | 1                                                          |
| 0.010087371                                                  | 0.015922552                                   | 0.979594006                                                |
| 0.007223788                                                  | 0.017826033                                   | 1                                                          |

| log.sigma.4.0.mm.3D_gldzm_LowIntensityEmphasis | log.sigma.4.0.mm.3D_gldzm_LargeDistanceEmphasis | log.sigma.4.0.mm.3D_gldzm_HighIntensitySmallDistanceEmphasis |
|------------------------------------------------|-------------------------------------------------|--------------------------------------------------------------|
| 0.024047422                                    | 1.063157895                                     | 168.6210526                                                  |
| 0.028847807                                    | 1.103658537                                     | 121.8140244                                                  |
| 0.04488159                                     | 1.054545455                                     | 87.05909091                                                  |
| 0.009832697                                    | 1.217758985                                     | 258.4258868                                                  |
| 0.032173401                                    | 1.142857143                                     | 207.6111111                                                  |
| 0.037643209                                    | 1                                               | 86.4057971                                                   |
| 0.084432039                                    | 1                                               | 38.03333333                                                  |
| 0.031264964                                    | 1.041666667                                     | 160.3489583                                                  |
| 0.008627777                                    | 2.220103986                                     | 216.7463051                                                  |
| 0.014547608                                    | 1.098484848                                     | 183.7961911                                                  |
| 0.0290706                                      | 1.156521739                                     | 107.5608696                                                  |
| 0.023983303                                    | 1.019480519                                     | 147.0454545                                                  |
| 0.0453943                                      | 1.102564103                                     | 114.1848291                                                  |
| 0.025366564                                    | 1.072368421                                     | 133.1578947                                                  |
| 0.023020493                                    | 1.042253521                                     | 124.5950704                                                  |
| 0.013192361                                    | 1.040380048                                     | 176.3563605                                                  |
| 0.036078947                                    | 1.027272727                                     | 124.7022727                                                  |
| 0.023766078                                    | 1.103448276                                     | 126.4894636                                                  |
| 0.030561065                                    | 1                                               | 173.7526882                                                  |
| 0.026296557                                    | 1.138728324                                     | 95.10260116                                                  |
| 0.029816398                                    | 1.035483871                                     | 105.409767                                                   |
| 0.028733347                                    | 1.026548673                                     | 133.2411504                                                  |
| 0.023491273                                    | 1.012195122                                     | 143.4552846                                                  |
| 0.023334628                                    | 1                                               | 262.1025641                                                  |
| 0.045529828                                    | 1                                               | 83.71774194                                                  |
| 0.047438759                                    | 1.036144578                                     | 95.87048193                                                  |
| 0.021737367                                    | 1                                               | 123.5068493                                                  |
| 0.019406267                                    | 1.036585366                                     | 131.0762195                                                  |
| 0.014453647                                    | 1.101351351                                     | 173.6589089                                                  |
| 0.03968721                                     | 1.100591716                                     | 115.6342867                                                  |
| 0.022102078                                    | 1.116541353                                     | 143.1599833                                                  |
| 0.014488872                                    | 1.122137405                                     | 168.678626                                                   |
| 0.028229577                                    | 1.118081181                                     | 152.7291923                                                  |
| 0.141638554                                    | 1                                               | 86.9                                                         |
| 0.030389482                                    | 1.046153846                                     | 206.9692308                                                  |
| 0.018092074                                    | 1.231543624                                     | 149.7323826                                                  |
| 0.019399547                                    | 1.223057644                                     | 116.2406015                                                  |
| 0.022400332                                    | 1.124590164                                     | 130.4052823                                                  |
| 0.024632546                                    | 1.102564103                                     | 170.3782051                                                  |
| 0.039881159                                    | 1.144                                           | 110                                                          |
| 0.019888433                                    | 1.0234375                                       | 180.4160156                                                  |
| 0.020797331                                    | 1.107913669                                     | 163.1438849                                                  |
| 0.023078563                                    | 1.097457627                                     | 120.195033                                                   |
| 0.031523655                                    | 1.093333333                                     | 152.6640741                                                  |
| 0.020312058                                    | 1.415441176                                     | 137.8348652                                                  |
| 0.03179298                                     | 1                                               | 68.18978102                                                  |
| 0.010880762                                    | 2.16395664                                      | 166.9737748                                                  |
| 0.046931856                                    | 1.071428571                                     | 84.07738095                                                  |
| 0.083849846                                    | 1                                               | 106.5714286                                                  |
| 0.01840797                                     | 1.095744681                                     | 285.8776596                                                  |
| 0.022966482                                    | 1.019169329                                     | 131.3146965                                                  |
| 0.031508914                                    | 1.285714286                                     | 83.13141923                                                  |
| 0.017915996                                    | 1.252232143                                     | 154.7457372                                                  |
| 0.04318698                                     | 1.056603774                                     | 94.54716981                                                  |
| 0.016835372                                    | 1.127862595                                     | 122.5091709                                                  |
| 0.026170121                                    | 1.042857143                                     | 148.9392857                                                  |
| 0.013716444                                    | 1.056149733                                     | 195.3282086                                                  |
| 0.014527551                                    | 1.090128755                                     | 257.6920601                                                  |
| 0.030521222                                    | 1.03                                            | 138.87                                                       |
| 0.033345054                                    | 1                                               | 108.5479452                                                  |
| 0.031177197                                    | 1.272727273                                     | 100.3095238                                                  |
| 0.009415038                                    | 1.148664344                                     | 244.7525487                                                  |
| 0.020639616                                    | 1.010380623                                     | 109.516436                                                   |
| 0.027377597                                    | 1.055214724                                     | 85.30368098                                                  |
| 0.065154749                                    | 1                                               | 96.5                                                         |
| 0.021646474                                    | 1.197674419                                     | 161.7180233                                                  |
| 0.033090352                                    | 1.052631579                                     | 173.2149123                                                  |
| 0.028667371                                    | 1.367483296                                     | 118.549802                                                   |
| 0.034821033                                    | 1.044117647                                     | 93.93014706                                                  |
| 0.025463912                                    | 1.110294118                                     | 113.5808824                                                  |
| 0.013659997                                    | 1.065                                           | 162.0815278                                                  |
| 0.026507107                                    | 1.107142857                                     | 119.5642857                                                  |
| 0.015108007                                    | 1.117647059                                     | 132.8210784                                                  |
| 0.050927288                                    | 1.094907407                                     | 69.80846515                                                  |
| 0.010796651                                    | 1.16468039                                      | 196.228582                                                   |
| 0.023950466                                    | 1.018072289                                     | 181.9051205                                                  |
| 0.026908658                                    | 1.022556391                                     | 114.8139098                                                  |
| 0.066264553                                    | 1.04109589                                      | 69.45205479                                                  |
| 0.018503314                                    | 1.091304348                                     | 152.35                                                       |
| 0.012235266                                    | 1.06097561                                      | 195.9515583                                                  |
| 0.028631554                                    | 1                                               | 154.2236842                                                  |
| 0.013423981                                    | 1.032967033                                     | 232.4844322                                                  |
| 0.008170249                                    | 1.19434629                                      | 263.968247                                                   |
| 0.068490374                                    | 1                                               | 99.52173913                                                  |
| 0.030006279                                    | 1.156084656                                     | 110.275463                                                   |
| 0.019302826                                    | 1.017408124                                     | 128.5517408                                                  |
| 0.031220263                                    | 1.08411215                                      | 112.5794393                                                  |
| 0.01276065                                     | 1.053571429                                     | 248.4366071                                                  |
| 0.12011423                                     | 1                                               | 43.36363636                                                  |
| 0.141094028                                    | 1.666666667                                     | 56.61111111                                                  |
| 0.0127992                                      | 1.202020202                                     | 190.2606622                                                  |
| 0.050217792                                    | 1.031914894                                     | 98.04255319                                                  |
| 0.037206685                                    | 1.0625                                          | 86.4609375                                                   |
| 0.0325521                                      | 1.046875                                        | 111.8148438                                                  |
| 0.020767536                                    | 1.079207921                                     | 126.8911579                                                  |
| 0.036069721                                    | 1                                               | 192.6842105                                                  |
| 0.01537789                                     | 1.131707317                                     | 202.7402439                                                  |
| 0.116354386                                    | 1                                               | 47.38461538                                                  |
| 0.019204892                                    | 1.030927835                                     | 222.1546392                                                  |
| 0.02803164                                     | 1                                               | 145.6896552                                                  |

| log.sigma.4.0.mm.3D_gldzm_LowintensityLargeDistanceEmphasis | log.sigma.4.0.mm.3D_gldzm_HighIntensityEmphasis | log.sigma.4.0.mm.3D_gldzm_DistanceZoneVariability | log.sigma.4.0.mm.3D_gldzm_ZonePercentage |
|-------------------------------------------------------------|-------------------------------------------------|---------------------------------------------------|------------------------------------------|
| 0.026336895                                                 | 169.5368421                                     | 91.08421053                                       | 0.263157895                              |
| 0.047913539                                                 | 123.7195122                                     | 156.1585366                                       | 0.116892373                              |
| 0.050942196                                                 | 87.18181818                                     | 53.03636364                                       | 0.310734463                              |
| 0.014737309                                                 | 262.6807611                                     | 414.8181818                                       | 0.244697362                              |
| 0.086406205                                                 | 208.1587302                                     | 57.28571429                                       | 0.623762376                              |
| 0.037643209                                                 | 86.4057971                                      | 69                                                | 0.282786885                              |
| 0.084432039                                                 | 38.03333333                                     | 30                                                | 0.428571429                              |
| 0.053400381                                                 | 160.4375                                        | 140.0555556                                       | 0.359102244                              |
| 0.013512209                                                 | 379.3795494                                     | 308.3656846                                       | 0.390921409                              |
| 0.015110266                                                 | 189.1780303                                     | 250.3257576                                       | 0.113842173                              |
| 0.065669835                                                 | 108.7478261                                     | 103.626087                                        | 0.305851064                              |
| 0.024287686                                                 | 147.3571429                                     | 152.012987                                        | 0.20343461                               |
| 0.079262521                                                 | 115.2136752                                     | 218.5470085                                       | 0.171303075                              |
| 0.030950547                                                 | 133.6513158                                     | 148.0394737                                       | 0.287878788                              |
| 0.044321855                                                 | 125.2394366                                     | 138.056338                                        | 0.39010989                               |
| 0.014637788                                                 | 176.9287411                                     | 413.0617577                                       | 0.03888068                               |
| 0.063351674                                                 | 124.7090909                                     | 108.0181818                                       | 0.506912442                              |
| 0.028496172                                                 | 128.394636                                      | 243.6206897                                       | 0.168170103                              |
| 0.030561065                                                 | 173.7526882                                     | 93                                                | 0.510989011                              |
| 0.045910906                                                 | 96.79768786                                     | 157.7398844                                       | 0.062364816                              |
| 0.030026361                                                 | 106.3032258                                     | 306.0193548                                       | 0.061083744                              |
| 0.042278588                                                 | 133.4070796                                     | 222.0353982                                       | 0.248624862                              |
| 0.023830026                                                 | 143.5650407                                     | 244.0081301                                       | 0.084246575                              |
| 0.023334628                                                 | 262.1025641                                     | 78                                                | 0.586466165                              |
| 0.045529828                                                 | 83.71774194                                     | 124                                               | 0.129166667                              |
| 0.051454823                                                 | 95.95180723                                     | 81.02409639                                       | 0.274834437                              |
| 0.021737367                                                 | 123.5068493                                     | 219                                               | 0.095674967                              |
| 0.01966204                                                  | 132.5                                           | 240.0731707                                       | 0.063157895                              |
| 0.015297042                                                 | 176.0022523                                     | 424.3558559                                       | 0.119483315                              |
| 0.040815825                                                 | 117.7751479                                     | 161.1538462                                       | 0.0998228                                |
| 0.024228284                                                 | 145.6428571                                     | 252.2932331                                       | 0.063318258                              |
| 0.017558419                                                 | 170.1725191                                     | 623.7358779                                       | 0.074153742                              |
| 0.030961571                                                 | 154.0848708                                     | 253.5387454                                       | 0.195104392                              |
| 0.141638554                                                 | 86.9                                            | 10                                                | 0.666666667                              |
| 0.041927943                                                 | 207.0153846                                     | 63.03076923                                       | 0.575221239                              |
| 0.022181764                                                 | 155.6342282                                     | 263.8724832                                       | 0.223388306                              |
| 0.02273295                                                  | 120.1177945                                     | 353.6616541                                       | 0.059632342                              |
| 0.03144996                                                  | 131.3442623                                     | 283.7278689                                       | 0.100593668                              |
| 0.03278386                                                  | 171.3846154                                     | 109.2735043                                       | 0.364485981                              |
| 0.069990789                                                 | 111.8                                           | 113.576                                           | 0.232774674                              |
| 0.020366749                                                 | 180.703125                                      | 126.015625                                        | 0.179020979                              |
| 0.046035653                                                 | 164.5251799                                     | 129.3597122                                       | 0.364829396                              |
| 0.024377316                                                 | 122.1059322                                     | 224.2627119                                       | 0.286407767                              |
| 0.036501432                                                 | 153.3466667                                     | 144.0933333                                       | 0.341685649                              |
| 0.029969073                                                 | 156.0110294                                     | 216.2720588                                       | 0.243946188                              |
| 0.03179298                                                  | 68.18978102                                     | 137                                               | 0.022378308                              |
| 0.016374395                                                 | 238.1775068                                     | 484.9891599                                       | 0.268754552                              |
| 0.051628973                                                 | 84.5952381                                      | 80.0952381                                        | 0.368421053                              |
| 0.083849846                                                 | 106.5714286                                     | 14                                                | 0.636363636                              |
| 0.052098129                                                 | 286.5957447                                     | 88.19148936                                       | 0.643835616                              |
| 0.023545474                                                 | 131.4920128                                     | 309.0255591                                       | 0.076715686                              |
| 0.034434128                                                 | 88.66386555                                     | 103.8739496                                       | 0.29528536                               |
| 0.02095752                                                  | 160.4821429                                     | 395.15625                                         | 0.140219092                              |
| 0.046724715                                                 | 94.77358491                                     | 51.03773585                                       | 0.221757322                              |
| 0.019917431                                                 | 124.870229                                      | 487.2480916                                       | 0.046347072                              |
| 0.048036011                                                 | 149.2071429                                     | 136.0571429                                       | 0.417910448                              |
| 0.015093985                                                 | 196.328877                                      | 360.2620321                                       | 0.428899083                              |
| 0.034879131                                                 | 258.4420601                                     | 219.4206009                                       | 0.508733624                              |
| 0.032396222                                                 | 138.99                                          | 98.02                                             | 0.282485876                              |
| 0.033345054                                                 | 108.5479452                                     | 73                                                | 0.156652361                              |
| 0.035181981                                                 | 108.1082251                                     | 192.8181818                                       | 0.158762887                              |
| 0.015319265                                                 | 248.116144                                      | 782.8118467                                       | 0.127066116                              |
| 0.02070104                                                  | 109.9550173                                     | 287.0069204                                       | 0.070937653                              |
| 0.028640065                                                 | 85.9202454                                      | 157.1104294                                       | 0.091470258                              |
| 0.065154749                                                 | 96.5                                            | 26                                                | 0.490566038                              |
| 0.032540639                                                 | 164.5116279                                     | 226.2403101                                       | 0.223958333                              |
| 0.085721931                                                 | 173.2280702                                     | 55.03508772                                       | 0.542857143                              |
| 0.034246705                                                 | 124.2249443                                     | 366.9777283                                       | 0.129506778                              |
| 0.078938681                                                 | 93.94117647                                     | 66.02941176                                       | 0.475524476                              |
| 0.028503131                                                 | 115.5220588                                     | 252.7352941                                       | 0.151785714                              |
| 0.014225015                                                 | 163.905                                         | 386.215                                           | 0.153905348                              |
| 0.048565475                                                 | 122.5428571                                     | 130.3571429                                       | 0.24691358                               |
| 0.023823794                                                 | 134.6740196                                     | 384.6519608                                       | 0.057814936                              |
| 0.053905756                                                 | 70.59259259                                     | 416.2361111                                       | 0.039874469                              |
| 0.016922645                                                 | 199.8569881                                     | 851.6738895                                       | 0.063571871                              |
| 0.024673358                                                 | 182.0180723                                     | 164.0120482                                       | 0.372197309                              |
| 0.027187132                                                 | 115.2706767                                     | 131.0150376                                       | 0.291666667                              |
| 0.067406106                                                 | 69.82191781                                     | 71.02739726                                       | 0.325892857                              |
| 0.019835968                                                 | 155.0956522                                     | 216.426087                                        | 0.251916758                              |
| 0.01265421                                                  | 198.2987805                                     | 318.1280488                                       | 0.121301775                              |
| 0.028631554                                                 | 154.2236842                                     | 76                                                | 0.510067114                              |
| 0.014062717                                                 | 233.8278388                                     | 267.0659341                                       | 0.315606936                              |
| 0.01599685                                                  | 269.4823322                                     | 500.2084806                                       | 0.114830594                              |
| 0.068490374                                                 | 99.52173913                                     | 23                                                | 0.741935484                              |
| 0.040041272                                                 | 111.9285714                                     | 358.4074074                                       | 0.07617896                               |
| 0.020260273                                                 | 128.6344294                                     | 511.0348162                                       | 0.147419447                              |
| 0.038862397                                                 | 114.0654206                                     | 101.1682243                                       | 0.293150685                              |
| 0.016305479                                                 | 250.0464286                                     | 270.1785714                                       | 0.475382003                              |
| 0.12011423                                                  | 43.36363636                                     | 22                                                | 0.44                                     |
| 0.511464398                                                 | 57.44444444                                     | 5.888888889                                       | 0.692307692                              |
| 0.014752869                                                 | 197.0565657                                     | 438.410101                                        | 0.144356955                              |
| 0.050716462                                                 | 98.55319149                                     | 92.0212766                                        | 0.309210526                              |
| 0.048491407                                                 | 86.5625                                         | 92.08333333                                       | 0.230769231                              |
| 0.033755001                                                 | 112.346875                                      | 310.15625                                         | 0.08762322                               |
| 0.029151679                                                 | 128.1856436                                     | 386.3613861                                       | 0.055940183                              |
| 0.036069721                                                 | 192.6842105                                     | 38                                                | 0.603174603                              |
| 0.038847403                                                 | 203.8487805                                     | 187.7902439                                       | 0.301470588                              |
| 0.116354386                                                 | 47.38461538                                     | 13                                                | 0.541666667                              |
| 0.020063998                                                 | 222.4329897                                     | 95.02061856                                       | 0.595092025                              |
| 0.02803164                                                  | 145.6896552                                     | 87                                                | 0.310714286                              |

| log.sigma.4.0.mm.3D_gldzm_IntensityVariabilityNormalized | log.sigma.4.0.mm.3D_gldzm_LowIntensitySmallDistanceEmphasis | log.sigma.4.0.mm.3D_gldzm_IntensityVariability |
|----------------------------------------------------------|-------------------------------------------------------------|------------------------------------------------|
| 0.067036011                                              | 0.023475053                                                 | 6.368421053                                    |
| 0.076740036                                              | 0.024111486                                                 | 12.58536585                                    |
| 0.081652893                                              | 0.043366439                                                 | 4.490909091                                    |
| 0.055839878                                              | 0.008654959                                                 | 26.41226216                                    |
| 0.049130763                                              | 0.0186152                                                   | 3.095238095                                    |
| 0.105650074                                              | 0.037643209                                                 | 7.289855072                                    |
| 0.133333333                                              | 0.084432039                                                 | 4                                              |
| 0.062017747                                              | 0.02573111                                                  | 8.930555556                                    |
| 0.039242601                                              | 0.007473392                                                 | 22.64288094                                    |
| 0.069846189                                              | 0.014423383                                                 | 18.43939394                                    |
| 0.092325142                                              | 0.019920791                                                 | 10.6173913                                     |
| 0.065441052                                              | 0.023907207                                                 | 10.07792208                                    |
| 0.074512382                                              | 0.036927244                                                 | 17.43589744                                    |
| 0.072628116                                              | 0.024060814                                                 | 11.03947368                                    |
| 0.075877802                                              | 0.017695152                                                 | 10.77464789                                    |
| 0.082966131                                              | 0.01284447                                                  | 34.92874109                                    |
| 0.07107438                                               | 0.029260765                                                 | 7.818181818                                    |
| 0.079138592                                              | 0.022583554                                                 | 20.65517241                                    |
| 0.051913516                                              | 0.030561065                                                 | 4.827956989                                    |
| 0.090647867                                              | 0.02139297                                                  | 15.68208092                                    |
| 0.080874089                                              | 0.029785115                                                 | 25.07096774                                    |
| 0.064100556                                              | 0.025347036                                                 | 14.48672566                                    |
| 0.073534272                                              | 0.023406584                                                 | 18.08943089                                    |
| 0.05095332                                               | 0.023334628                                                 | 3.974358974                                    |
| 0.087799168                                              | 0.045529828                                                 | 10.88709677                                    |
| 0.087530846                                              | 0.046434743                                                 | 7.265060241                                    |
| 0.078125977                                              | 0.021737367                                                 | 17.10958904                                    |
| 0.080408487                                              | 0.019342324                                                 | 19.7804878                                     |
| 0.064554419                                              | 0.014281496                                                 | 28.66216216                                    |
| 0.066279192                                              | 0.039430738                                                 | 11.20118343                                    |
| 0.075583696                                              | 0.02161315                                                  | 20.10526316                                    |
| 0.080263388                                              | 0.013803947                                                 | 52.57251908                                    |
| 0.061777481                                              | 0.027610641                                                 | 16.74169742                                    |
| 0.1                                                      | 0.141638554                                                 | 1                                              |
| 0.056094675                                              | 0.027504866                                                 | 3.646153846                                    |
| 0.072406648                                              | 0.017128341                                                 | 21.57718121                                    |
| 0.079176638                                              | 0.018621498                                                 | 31.5914787                                     |
| 0.076484816                                              | 0.020194847                                                 | 23.32786885                                    |
| 0.063189422                                              | 0.022594717                                                 | 7.393162393                                    |
| 0.07904                                                  | 0.032353752                                                 | 9.88                                           |
| 0.068481445                                              | 0.019768854                                                 | 8.765625                                       |
| 0.068267688                                              | 0.01448775                                                  | 9.489208633                                    |
| 0.076378914                                              | 0.022781733                                                 | 18.02542373                                    |
| 0.066755556                                              | 0.030353284                                                 | 10.01333333                                    |
| 0.065852076                                              | 0.018066579                                                 | 17.91176471                                    |
| 0.115030103                                              | 0.03179298                                                  | 15.75912409                                    |
| 0.056693914                                              | 0.009824875                                                 | 41.8401084                                     |
| 0.087018141                                              | 0.045757577                                                 | 7.30952381                                     |
| 0.091836735                                              | 0.083849846                                                 | 1.285714286                                    |
| 0.050022635                                              | 0.00998543                                                  | 4.70212766                                     |
| 0.070216089                                              | 0.022821734                                                 | 21.97763578                                    |
| 0.101052186                                              | 0.03092623                                                  | 12.02521008                                    |
| 0.069893973                                              | 0.01721139                                                  | 31.3125                                        |
| 0.086507654                                              | 0.042302546                                                 | 4.58490566                                     |
| 0.090044286                                              | 0.016089951                                                 | 47.18320611                                    |
| 0.062142857                                              | 0.020703649                                                 | 8.7                                            |
| 0.062269439                                              | 0.013372059                                                 | 23.28877005                                    |
| 0.052625762                                              | 0.009439656                                                 | 12.26180258                                    |
| 0.0618                                                   | 0.030052472                                                 | 6.18                                           |
| 0.082004128                                              | 0.033345054                                                 | 5.98630137                                     |
| 0.087273477                                              | 0.030176001                                                 | 20.16017316                                    |
| 0.053983362                                              | 0.007949646                                                 | 46.4796748                                     |
| 0.093305875                                              | 0.02062426                                                  | 26.96539792                                    |
| 0.105875268                                              | 0.02706198                                                  | 17.25766871                                    |
| 0.091715976                                              | 0.065154749                                                 | 2.384615385                                    |
| 0.067243555                                              | 0.018922933                                                 | 17.34883721                                    |
| 0.063711911                                              | 0.019932457                                                 | 3.631578947                                    |
| 0.072286348                                              | 0.027451874                                                 | 32.45657016                                    |
| 0.095588235                                              | 0.023791622                                                 | 6.5                                            |
| 0.073718642                                              | 0.024704107                                                 | 20.05147059                                    |
| 0.0766                                                   | 0.01354652                                                  | 30.64                                          |
| 0.081632653                                              | 0.020992515                                                 | 11.42857143                                    |
| 0.08822328                                               | 0.012976931                                                 | 35.99509804                                    |
| 0.088627401                                              | 0.050257733                                                 | 38.28703704                                    |
| 0.069281595                                              | 0.009329925                                                 | 63.94691224                                    |
| 0.066047322                                              | 0.023769744                                                 | 10.96385542                                    |
| 0.085081124                                              | 0.026839039                                                 | 11.31578947                                    |
| 0.1026459                                                | 0.065979165                                                 | 7.493150685                                    |
| 0.067183365                                              | 0.01817015                                                  | 15.45217391                                    |
| 0.067240482                                              | 0.012142252                                                 | 22.05487805                                    |
| 0.073060942                                              | 0.028631554                                                 | 5.552631579                                    |
| 0.053952153                                              | 0.013264297                                                 | 14.72893773                                    |
| 0.061269338                                              | 0.006225215                                                 | 34.67844523                                    |
| 0.088846881                                              | 0.068490374                                                 | 2.043478261                                    |
| 0.083970214                                              | 0.027605996                                                 | 31.74074074                                    |
| 0.083927883                                              | 0.019063464                                                 | 43.39071567                                    |
| 0.080793082                                              | 0.02930973                                                  | 8.644859813                                    |
| 0.058954082                                              | 0.011874442                                                 | 16.50714286                                    |
| 0.123966942                                              | 0.12011423                                                  | 2.727272727                                    |
| 0.135802469                                              | 0.048501436                                                 | 1.222222222                                    |
| 0.067425773                                              | 0.012329163                                                 | 33.37575758                                    |
| 0.07129923                                               | 0.050093124                                                 | 6.70212766                                     |
| 0.078559028                                              | 0.034385504                                                 | 7.541666667                                    |
| 0.07875                                                  | 0.032251375                                                 | 25.2                                           |
| 0.072529654                                              | 0.018687774                                                 | 29.3019802                                     |
| 0.063711911                                              | 0.036069721                                                 | 2.421052632                                    |
| 0.059940512                                              | 0.009510512                                                 | 12.28780488                                    |
| 0.136094675                                              | 0.116354386                                                 | 1.769230769                                    |
| 0.05919864                                               | 0.018990115                                                 | 5.742268041                                    |
| 0.0651341                                                | 0.02803164                                                  | 5.666666667                                    |

| log.sigma.4.0.mm.3D_gldzm_HighIntensityLargeDistanceEmphasis | log.sigma.4.0.mm.3D_gldzm_SmallDistanceEmphasis | log.sigma.4.0.mm.3D_glcm_SumVariance | log.sigma.4.0.mm.3D_glcm_Homogeneity1 |
|--------------------------------------------------------------|-------------------------------------------------|--------------------------------------|---------------------------------------|
| 173.2                                                        | 0.984210526                                     | 352.3179261                          | 0.418632812                           |
| 137.4390244                                                  | 0.980860434                                     | 320.6593135                          | 0.530480223                           |
| 87.67272727                                                  | 0.986363636                                     | 107.9019825                          | 0.396610182                           |
| 281.5983087                                                  | 0.950258398                                     | 527.9849131                          | 0.423225013                           |
| 210.3492063                                                  | 0.964285714                                     | 402.1867594                          | 0.270008469                           |
| 86.4057971                                                   | 1                                               | 83.67390243                          | 0.435332138                           |
| 38.03333333                                                  | 1                                               | 45.64070026                          | 0.427108073                           |
| 160.7916667                                                  | 0.989583333                                     | 213.9344785                          | 0.363100291                           |
| 1205.52513                                                   | 0.746184768                                     | 1269.875916                          | 0.296579737                           |
| 215.0151515                                                  | 0.979587542                                     | 422.1276749                          | 0.527578432                           |
| 113.4956522                                                  | 0.960869565                                     | 130.6533329                          | 0.407861611                           |
| 148.6038961                                                  | 0.99512987                                      | 275.1298899                          | 0.443753372                           |
| 119.3290598                                                  | 0.974358974                                     | 116.905475                           | 0.464355931                           |
| 137.9934211                                                  | 0.989217836                                     | 142.363921                           | 0.411821742                           |
| 127.8169014                                                  | 0.98943662                                      | 155.196343                           | 0.363399062                           |
| 181.2874109                                                  | 0.992544207                                     | 508.8508417                          | 0.749874481                           |
| 124.7363636                                                  | 0.993181818                                     | 170.8315796                          | 0.313180985                           |
| 136.0153257                                                  | 0.974137931                                     | 167.6643578                          | 0.462248604                           |
| 173.7526882                                                  | 1                                               | 221.2044739                          | 0.297315742                           |
| 103.5780347                                                  | 0.965317919                                     | 231.3396014                          | 0.587167043                           |
| 112.3                                                        | 0.994713262                                     | 279.0761898                          | 0.635865387                           |
| 134.0707965                                                  | 0.993362832                                     | 168.7387882                          | 0.429028054                           |
| 144.004065                                                   | 0.99695122                                      | 394.9752548                          | 0.600897544                           |
| 262.1025641                                                  | 1                                               | 734.1440001                          | 0.314653823                           |
| 83.71774194                                                  | 1                                               | 162.8700202                          | 0.558427797                           |
| 96.27710843                                                  | 0.990963855                                     | 147.7440098                          | 0.407839336                           |
| 123.5068493                                                  | 1                                               | 235.1076055                          | 0.593477728                           |
| 138.195122                                                   | 0.990853659                                     | 451.0187711                          | 0.675081056                           |
| 191.2815315                                                  | 0.98216967                                      | 542.6169927                          | 0.591547253                           |
| 133.0710059                                                  | 0.981426693                                     | 378.7882757                          | 0.553106457                           |
| 162.1240602                                                  | 0.979218881                                     | 345.3777157                          | 0.620841975                           |
| 182.9877863                                                  | 0.981340119                                     | 398.1942804                          | 0.659683606                           |
| 160.5571956                                                  | 0.974579746                                     | 258.7080637                          | 0.429816341                           |
| 86.9                                                         | 1                                               | 214.4427034                          | 0.28509031                            |
| 207.2                                                        | 0.988461538                                     | 397.1214009                          | 0.299055163                           |
| 188.1006711                                                  | 0.953299776                                     | 274.4651763                          | 0.418093001                           |
| 142.7568922                                                  | 0.954069201                                     | 416.9776986                          | 0.667048878                           |
| 136.0327869                                                  | 0.972495446                                     | 216.2830548                          | 0.55025433                            |
| 175.4102564                                                  | 0.974358974                                     | 271.0198902                          | 0.348892427                           |
| 119                                                          | 0.964                                           | 213.088643                           | 0.409655117                           |
| 181.8515625                                                  | 0.994140625                                     | 473.4721737                          | 0.477723198                           |
| 170.0503597                                                  | 0.973021583                                     | 226.5908894                          | 0.394943795                           |
| 132.9322034                                                  | 0.980343691                                     | 180.7795838                          | 0.402162986                           |
| 159.04                                                       | 0.984074074                                     | 176.7489647                          | 0.382291063                           |
| 238.7647059                                                  | 0.912479575                                     | 268.6933707                          | 0.390525591                           |
| 68.18978102                                                  | 1                                               | 254.7780988                          | 0.742014904                           |
| 863.5474255                                                  | 0.835949262                                     | 439.3827886                          | 0.379816475                           |
| 86.66666667                                                  | 0.982142857                                     | 73.47499098                          | 0.403176481                           |
| 106.5714286                                                  | 1                                               | 182.1369067                          | 0.289473232                           |
| 289.4680851                                                  | 0.97606383                                      | 535.3248685                          | 0.24852743                            |
| 132.201278                                                   | 0.995207668                                     | 351.4923598                          | 0.622406353                           |
| 120.8403361                                                  | 0.947245565                                     | 94.32469556                          | 0.411622202                           |
| 200.4977679                                                  | 0.951977927                                     | 395.4634225                          | 0.484305877                           |
| 95.67924528                                                  | 0.985849057                                     | 143.2123881                          | 0.415998516                           |
| 137.1812977                                                  | 0.972275233                                     | 382.8446435                          | 0.703449597                           |
| 150.2785714                                                  | 0.989285714                                     | 223.0965153                          | 0.339193427                           |
| 200.3315508                                                  | 0.985962567                                     | 360.0565283                          | 0.348666347                           |
| 261.4420601                                                  | 0.977467811                                     | 491.8094266                          | 0.289517487                           |
| 139.47                                                       | 0.9925                                          | 221.108583                           | 0.407625298                           |
| 108.5479452                                                  | 1                                               | 160.2677743                          | 0.468225122                           |
| 139.3030303                                                  | 0.931818182                                     | 206.2110775                          | 0.457916283                           |
| 262.195122                                                   | 0.964124403                                     | 582.3991027                          | 0.556919745                           |
| 111.7093426                                                  | 0.997404844                                     | 236.4595569                          | 0.619233809                           |
| 88.38650307                                                  | 0.986196319                                     | 224.707467                           | 0.569488715                           |
| 96.5                                                         | 1                                               | 168.7710029                          | 0.321341957                           |
| 175.6860465                                                  | 0.950581395                                     | 320.4499844                          | 0.425940147                           |
| 173.2807018                                                  | 0.986842105                                     | 254.186856                           | 0.294338882                           |
| 152.1915367                                                  | 0.922976986                                     | 291.8458529                          | 0.522248133                           |
| 93.98529412                                                  | 0.988970588                                     | 96.90272438                          | 0.378935314                           |
| 123.2867647                                                  | 0.972426471                                     | 265.5817238                          | 0.499384573                           |
| 172.31                                                       | 0.986527778                                     | 389.8805214                          | 0.497113647                           |
| 134.4571429                                                  | 0.973214286                                     | 173.8015661                          | 0.418088574                           |
| 146.0563725                                                  | 0.977481618                                     | 391.8562112                          | 0.645416021                           |
| 78.125                                                       | 0.985355581                                     | 218.1376517                          | 0.687601688                           |
| 221.4084507                                                  | 0.969175093                                     | 482.5762137                          | 0.68228905                            |
| 182.4698795                                                  | 0.995481928                                     | 288.5678436                          | 0.363333101                           |
| 117.0977444                                                  | 0.994360902                                     | 161.9002666                          | 0.417166054                           |
| 71.30136986                                                  | 0.989726027                                     | 46.97364484                          | 0.423361742                           |
| 166.0782609                                                  | 0.977173913                                     | 347.2022167                          | 0.427367667                           |
| 211.6036585                                                  | 0.988143631                                     | 514.7041159                          | 0.563177913                           |
| 154.2236842                                                  | 1                                               | 231.7661256                          | 0.312847583                           |
| 239.2014652                                                  | 0.991758242                                     | 499.9411508                          | 0.393885656                           |
| 292.8657244                                                  | 0.953376521                                     | 757.9234953                          | 0.567592912                           |
| 99.52173913                                                  | 1                                               | 208.5863701                          | 0.294749418                           |
| 130.2936508                                                  | 0.978799236                                     | 237.0092653                          | 0.607249431                           |
| 128.9651838                                                  | 0.995647969                                     | 201.3123317                          | 0.514309551                           |
| 120.0093458                                                  | 0.978971963                                     | 150.2369357                          | 0.410694343                           |
| 256.4857143                                                  | 0.986607143                                     | 469.381633                           | 0.317468461                           |
| 43.36363636                                                  | 1                                               | 61.89220998                          | 0.40774375                            |
| 60.77777778                                                  | 0.833333333                                     | 86.22126839                          | 0.354662698                           |
| 228.9090909                                                  | 0.953984287                                     | 539.7332054                          | 0.542338998                           |
| 100.5957447                                                  | 0.992021277                                     | 134.3365287                          | 0.399953577                           |
| 86.96875                                                     | 0.984375                                        | 156.0152389                          | 0.456498854                           |
| 114.475                                                      | 0.98828125                                      | 309.3698096                          | 0.564529017                           |
| 135.2227723                                                  | 0.982948295                                     | 322.1690627                          | 0.646341489                           |
| 192.6842105                                                  | 1                                               | 479.6715279                          | 0.263810798                           |
| 208.2829268                                                  | 0.967073171                                     | 300.0725348                          | 0.368263431                           |
| 47.38461538                                                  | 1                                               | 78.25065381                          | 0.357614375                           |
| 223.5463918                                                  | 0.992268041                                     | 512.8842735                          | 0.314490558                           |
| 145.6896552                                                  | 1                                               | 358.1428553                          | 0.430581527                           |

| log.sigma.4.0.mm.3D_glc_m_Homogeneity2 | log.sigma.4.0.mm.3D_glc_m_ClusterShade | log.sigma.4.0.mm.3D_glc_m_MaximumProbability | log.sigma.4.0.mm.3D_glc_m_Idmn | log.sigma.4.0.mm.3D_glc_m_SumVariance2 |
|----------------------------------------|----------------------------------------|----------------------------------------------|--------------------------------|----------------------------------------|
| 0.337972517                            | 4.7493666                              | 0.024347387                                  | 0.980609298                    | 53.1154421                             |
| 0.474924901                            | -89.91994485                           | 0.095431362                                  | 0.985151619                    | 31.95939464                            |
| 0.309389546                            | 80.73548155                            | 0.037863334                                  | 0.965612436                    | 30.6168678                             |
| 0.346169019                            | 10.12460156                            | 0.037980205                                  | 0.98650351                     | 49.39838832                            |
| 0.171504216                            | 589.2684657                            | 0.023491687                                  | 0.957664019                    | 105.103028                             |
| 0.360157288                            | 43.2548332                             | 0.044249199                                  | 0.960503182                    | 17.4533492                             |
| 0.347723913                            | 20.30561149                            | 0.067699425                                  | 0.943131346                    | 11.43340889                            |
| 0.27514966                             | 203.9636693                            | 0.023898967                                  | 0.974528145                    | 43.15139685                            |
| 0.206711271                            | 2055.461031                            | 0.008062672                                  | 0.974167733                    | 280.2719261                            |
| 0.472362334                            | -43.71447618                           | 0.048270778                                  | 0.991738431                    | 26.98445675                            |
| 0.326152193                            | 47.64262106                            | 0.052652611                                  | 0.970270502                    | 19.05154553                            |
| 0.369022527                            | -10.5953076                            | 0.024549476                                  | 0.985784372                    | 37.64111424                            |
| 0.394992016                            | 92.8544705                             | 0.04269854                                   | 0.983528013                    | 23.90210386                            |
| 0.332593887                            | 184.116958                             | 0.029038726                                  | 0.974938068                    | 37.25567266                            |
| 0.274869286                            | 110.8450697                            | 0.021538952                                  | 0.968749691                    | 39.34445878                            |
| 0.733548136                            | -104.4287496                           | 0.286302476                                  | 0.997216148                    | 13.88406049                            |
| 0.21674205                             | 74.48520976                            | 0.023631456                                  | 0.952175183                    | 46.03680511                            |
| 0.391904174                            | 20.05704824                            | 0.03131892                                   | 0.986126765                    | 27.37971318                            |
| 0.202580116                            | 275.7770315                            | 0.022101021                                  | 0.950897645                    | 75.09043592                            |
| 0.5438091                              | -58.11609423                           | 0.088244932                                  | 0.989789124                    | 28.44080004                            |
| 0.600807361                            | -54.12205725                           | 0.191918644                                  | 0.994144632                    | 17.55667487                            |
| 0.353144713                            | 156.2130748                            | 0.035506693                                  | 0.977762427                    | 35.92013232                            |
| 0.561280932                            | -99.98483368                           | 0.120691293                                  | 0.993357948                    | 22.9016504                             |
| 0.217296925                            | -488.031255                            | 0.029043988                                  | 0.969063063                    | 132.5359087                            |
| 0.511494418                            | -48.13557741                           | 0.049994327                                  | 0.987682435                    | 19.59788827                            |
| 0.323203792                            | -5.095663973                           | 0.03215968                                   | 0.967758591                    | 29.21302683                            |
| 0.551205284                            | -37.41788054                           | 0.13299397                                   | 0.993324538                    | 17.44351892                            |
| 0.643578891                            | -123.4108909                           | 0.291602696                                  | 0.997133818                    | 23.96454669                            |
| 0.542392001                            | -192.0501448                           | 0.239572086                                  | 0.99314933                     | 37.44349678                            |
| 0.499947516                            | -140.44253315                          | 0.132804014                                  | 0.988484247                    | 39.027329                              |
| 0.582536885                            | -75.29743333                           | 0.184817928                                  | 0.994020979                    | 21.92011535                            |
| 0.628073427                            | -84.61378992                           | 0.240504165                                  | 0.995605595                    | 18.53590495                            |
| 0.351361108                            | 8.641250853                            | 0.04188082                                   | 0.983681429                    | 44.80522743                            |
| 0.180110515                            | 97.31554256                            | 0.155128205                                  | 0.914734765                    | 43.03939103                            |
| 0.202436514                            | 78.6394759                             | 0.027382406                                  | 0.962336523                    | 67.18517596                            |
| 0.337593865                            | 32.95393768                            | 0.025350586                                  | 0.978705437                    | 32.04737236                            |
| 0.635524799                            | -140.5748624                           | 0.200130263                                  | 0.993712048                    | 23.56808738                            |
| 0.498029292                            | -36.33723079                           | 0.08732166                                   | 0.991053034                    | 29.99075805                            |
| 0.258949678                            | 134.9895538                            | 0.021230841                                  | 0.969052676                    | 73.90993098                            |
| 0.327072902                            | 89.8171869                             | 0.025430001                                  | 0.975460422                    | 45.56937138                            |
| 0.409768522                            | -117.3072688                           | 0.033484175                                  | 0.989067718                    | 41.54760137                            |
| 0.312450015                            | 181.4798371                            | 0.042687781                                  | 0.977723745                    | 32.64303654                            |
| 0.319156086                            | 22.23132391                            | 0.028046034                                  | 0.971677656                    | 24.74852862                            |
| 0.297088398                            | 258.7753618                            | 0.028562049                                  | 0.978781974                    | 44.32203505                            |
| 0.305373762                            | 398.7166419                            | 0.023340393                                  | 0.980972203                    | 56.36919176                            |
| 0.725253133                            | -63.96761039                           | 0.238230046                                  | 0.994324074                    | 12.70533368                            |
| 0.29619153                             | 899.2449152                            | 0.015923021                                  | 0.990193508                    | 76.28123967                            |
| 0.320984038                            | 97.47929136                            | 0.0512581                                    | 0.952454549                    | 24.82442926                            |
| 0.18730911                             | 53.29139888                            | 0.111847874                                  | 0.908561375                    | 30.17049481                            |
| 0.153996814                            | 226.9252364                            | 0.021963645                                  | 0.947963345                    | 115.2040067                            |
| 0.582216621                            | -93.41633397                           | 0.213125073                                  | 0.99283142                     | 24.52385023                            |
| 0.330305851                            | 48.56046708                            | 0.051543931                                  | 0.967004503                    | 17.8826512                             |
| 0.41808012                             | -87.14566022                           | 0.0632598                                    | 0.988902029                    | 38.3804145                             |
| 0.332408681                            | 43.27766616                            | 0.024331616                                  | 0.970339135                    | 39.51080758                            |
| 0.678535812                            | -111.5935187                           | 0.274377022                                  | 0.995336843                    | 18.57606324                            |
| 0.246636197                            | 72.91894876                            | 0.01886638                                   | 0.959399871                    | 46.84498382                            |
| 0.258340076                            | 126.8130716                            | 0.021113054                                  | 0.977972557                    | 43.5048324                             |
| 0.195311387                            | -123.7785505                           | 0.013262694                                  | 0.960197089                    | 97.11992424                            |
| 0.324322763                            | 83.0866949                             | 0.026927255                                  | 0.977918429                    | 40.98226572                            |
| 0.396105642                            | 47.94695029                            | 0.035862362                                  | 0.981512363                    | 35.03322996                            |
| 0.385247849                            | 68.09801326                            | 0.03101697                                   | 0.983304182                    | 31.08039095                            |
| 0.505974014                            | -141.5979285                           | 0.123128971                                  | 0.993667709                    | 40.61284982                            |
| 0.582260468                            | -58.39059132                           | 0.129719757                                  | 0.993929917                    | 18.81830936                            |
| 0.519886521                            | -34.39919188                           | 0.109574402                                  | 0.985051883                    | 21.8860435                             |
| 0.224286613                            | 10.15566791                            | 0.046901752                                  | 0.944999659                    | 35.86123811                            |
| 0.349325989                            | -63.37805399                           | 0.026302836                                  | 0.983450427                    | 42.43661058                            |
| 0.197038379                            | -1.596140909                           | 0.035265457                                  | 0.939935679                    | 51.6134616                             |
| 0.463349957                            | -112.6293658                           | 0.095897086                                  | 0.988206832                    | 48.96674704                            |
| 0.293651312                            | 110.8612296                            | 0.04954037                                   | 0.956621794                    | 28.04176026                            |
| 0.437776089                            | -43.81529671                           | 0.045266968                                  | 0.986388546                    | 32.16675981                            |
| 0.435322031                            | -67.7870776                            | 0.050089843                                  | 0.985692362                    | 34.02785615                            |
| 0.336681333                            | 45.12982302                            | 0.028757561                                  | 0.97677897                     | 27.54881865                            |
| 0.610412293                            | -109.3267079                           | 0.15941843                                   | 0.994135491                    | 24.77233159                            |
| 0.660930069                            | -92.44112163                           | 0.229698992                                  | 0.99172546                     | 19.53608149                            |
| 0.654640588                            | -93.83257373                           | 0.24068993                                   | 0.996365111                    | 19.43064245                            |
| 0.277454131                            | 90.53265883                            | 0.032051353                                  | 0.970947104                    | 42.58102341                            |
| 0.337356864                            | 47.30819558                            | 0.037007154                                  | 0.976224494                    | 22.0427528                             |
| 0.345637631                            | 83.74230621                            | 0.051264695                                  | 0.969818983                    | 18.66160345                            |
| 0.348300114                            | -28.77423957                           | 0.030542117                                  | 0.980787664                    | 27.76881487                            |
| 0.511662054                            | -75.93016237                           | 0.15244304                                   | 0.992187936                    | 27.2374257                             |
| 0.218527405                            | 81.01663784                            | 0.026084707                                  | 0.947071356                    | 44.97793791                            |
| 0.311394988                            | 78.51921889                            | 0.020109414                                  | 0.982868418                    | 50.55507856                            |
| 0.519011749                            | -167.2638968                           | 0.127523038                                  | 0.993285603                    | 33.35780841                            |
| 0.198037892                            | 8.938309694                            | 0.068357497                                  | 0.912115911                    | 33.04645466                            |
| 0.56705836                             | -66.87273051                           | 0.146412023                                  | 0.991169822                    | 20.38253505                            |
| 0.457091728                            | 16.98860421                            | 0.042421534                                  | 0.987635398                    | 19.45244049                            |
| 0.329442744                            | 93.26260957                            | 0.035934372                                  | 0.977359539                    | 26.64673078                            |
| 0.225349122                            | 57.80382333                            | 0.020067183                                  | 0.972440921                    | 61.25099526                            |
| 0.322577448                            | 3.818428071                            | 0.084920236                                  | 0.926971186                    | 9.195144345                            |
| 0.264425246                            | 32.2228701                             | 0.109126984                                  | 0.887206572                    | 18.75056689                            |
| 0.487049861                            | -199.2293605                           | 0.102883042                                  | 0.991583308                    | 45.24175062                            |
| 0.31683291                             | 264.5666803                            | 0.038945797                                  | 0.968759922                    | 42.38221571                            |
| 0.38465886                             | 10.12256118                            | 0.043174316                                  | 0.97497519                     | 25.23004181                            |
| 0.51606955                             | -68.13829248                           | 0.080982954                                  | 0.98956002                     | 31.80060742                            |
| 0.611423503                            | -89.63147458                           | 0.214552773                                  | 0.993503335                    | 23.19708805                            |
| 0.169469365                            | 172.8280355                            | 0.040801187                                  | 0.95297956                     | 54.27173823                            |
| 0.280850462                            | 105.6175471                            | 0.016224604                                  | 0.976482025                    | 55.4628452                             |
| 0.267394823                            | 40.66769133                            | 0.11325416                                   | 0.889235891                    | 21.02482747                            |
| 0.220033056                            | 343.9912885                            | 0.024062944                                  | 0.970994951                    | 87.84830682                            |
| 0.352783217                            | -106.4687624                           | 0.037119312                                  | 0.98272637                     | 40.0313635                             |

| log.sigma.4.0.mm.3D_glc_m_Contrast | log.sigma.4.0.mm.3D_glc_m_DifferenceEntropy | log.sigma.4.0.mm.3D_glc_m_InverseVariance | log.sigma.4.0.mm.3D_glc_m_Entropy | log.sigma.4.0.mm.3D_glc_m_Dissimilarity |
|------------------------------------|---------------------------------------------|-------------------------------------------|-----------------------------------|-----------------------------------------|
| 9.068929297                        | 2.697799545                                 | 0.346912078                               | 6.962263298                       | 2.33995266                              |
| 5.158711473                        | 2.373607831                                 | 0.404851469                               | 6.243832922                       | 1.610276891                             |
| 9.71878458                         | 2.674900486                                 | 0.321362231                               | 6.281174707                       | 2.487156158                             |
| 12.87785719                        | 2.961415769                                 | 0.322532219                               | 7.396673993                       | 2.616656172                             |
| 34.88411455                        | 3.354867546                                 | 0.183866362                               | 6.587744632                       | 4.7592601                               |
| 8.826991561                        | 2.683015569                                 | 0.360370089                               | 6.122682077                       | 2.266530742                             |
| 8.418171011                        | 2.425215281                                 | 0.358377796                               | 5.02303578                        | 2.233582595                             |
| 17.41409113                        | 3.146405523                                 | 0.278819156                               | 7.227205928                       | 3.205526066                             |
| 40.90966338                        | 3.715914058                                 | 0.212426595                               | 8.983632482                       | 4.835605679                             |
| 4.535258954                        | 2.311148918                                 | 0.426492948                               | 6.344825797                       | 1.546910247                             |
| 10.56402518                        | 2.809200493                                 | 0.330722062                               | 6.422785624                       | 2.520999914                             |
| 7.973106956                        | 2.602547694                                 | 0.373307276                               | 6.8776759                         | 2.130606177                             |
| 7.841106612                        | 2.624061693                                 | 0.381100313                               | 6.500115416                       | 2.046585554                             |
| 12.08596383                        | 2.904174831                                 | 0.326637661                               | 6.885359866                       | 2.619510841                             |
| 15.26119883                        | 3.027457866                                 | 0.294186699                               | 7.022229298                       | 3.052973092                             |
| 1.668315704                        | 1.588947518                                 | 0.346562519                               | 4.226242755                       | 0.68418464                              |
| 21.79418422                        | 3.128166693                                 | 0.233976283                               | 6.856643346                       | 3.766607602                             |
| 7.809247158                        | 2.636008458                                 | 0.37452596                                | 6.729607239                       | 2.06105898                              |
| 29.86552842                        | 3.394396755                                 | 0.205098396                               | 7.019612039                       | 4.355003157                             |
| 3.091435151                        | 2.085119261                                 | 0.430403149                               | 5.879391187                       | 1.238002807                             |
| 2.421560813                        | 1.951840107                                 | 0.41365053                                | 5.274876542                       | 1.040115597                             |
| 10.75150597                        | 2.822573931                                 | 0.34858705                                | 6.889280563                       | 2.423377207                             |
| 3.037222276                        | 2.058916236                                 | 0.434436264                               | 5.661973812                       | 1.190182531                             |
| 22.70842163                        | 3.150136298                                 | 0.212188485                               | 6.635329619                       | 3.843871755                             |
| 3.356811718                        | 2.099798792                                 | 0.458313159                               | 5.815519004                       | 1.321082005                             |
| 10.35807296                        | 2.789333533                                 | 0.314144661                               | 6.636494239                       | 2.501496145                             |
| 3.364434069                        | 2.120770538                                 | 0.422513872                               | 5.62583625                        | 1.245875039                             |
| 2.473457045                        | 1.912887678                                 | 0.360378851                               | 4.941938656                       | 0.963681872                             |
| 5.602782034                        | 2.396783041                                 | 0.326315703                               | 5.834098658                       | 1.512343825                             |
| 4.377180664                        | 2.305393611                                 | 0.393120231                               | 6.176614015                       | 1.479466456                             |
| 3.007009399                        | 2.059256023                                 | 0.405765582                               | 5.511731715                       | 1.143668166                             |
| 3.090380143                        | 2.007083443                                 | 0.379365894                               | 5.180953026                       | 1.054615593                             |
| 10.02111279                        | 2.811536143                                 | 0.333131513                               | 7.179820587                       | 2.378761515                             |
| 31.52051282                        | 1.887757777                                 | 0.128871523                               | 3.147435815                       | 4.534615385                             |
| 26.2635283                         | 3.229353559                                 | 0.217433462                               | 6.522393472                       | 4.111402976                             |
| 10.14375943                        | 2.81148097                                  | 0.33562701                                | 7.018242481                       | 2.429483394                             |
| 2.630524808                        | 1.951931957                                 | 0.372026167                               | 4.978860614                       | 0.999543504                             |
| 4.516129947                        | 2.320068428                                 | 0.403775265                               | 6.279694909                       | 1.495482565                             |
| 19.86919549                        | 3.138281735                                 | 0.267073716                               | 7.304042952                       | 3.419608165                             |
| 9.594115692                        | 2.748536377                                 | 0.339036851                               | 7.022539555                       | 2.41902938                              |
| 6.63642749                         | 2.49419142                                  | 0.389127502                               | 6.652601124                       | 1.890938969                             |
| 13.96132456                        | 2.996705643                                 | 0.311737888                               | 6.754153969                       | 2.812926044                             |
| 11.23717606                        | 2.862451003                                 | 0.325096534                               | 6.895655334                       | 2.586570813                             |
| 15.5421814                         | 3.059304207                                 | 0.295784148                               | 7.071274657                       | 2.975834354                             |
| 12.65309424                        | 2.955006358                                 | 0.306773997                               | 7.419824025                       | 2.753948714                             |
| 1.152709369                        | 1.515807347                                 | 0.369473985                               | 4.08192909                        | 0.645413604                             |
| 18.23733219                        | 3.149229085                                 | 0.305895681                               | 7.76804048                        | 3.091412157                             |
| 12.49619233                        | 2.912798451                                 | 0.309355411                               | 6.342962688                       | 2.699981058                             |
| 30.25276113                        | 2.427378222                                 | 0.15172066                                | 3.844684517                       | 4.442582418                             |
| 46.75324726                        | 3.629191102                                 | 0.1650272                                 | 7.004280175                       | 5.557015021                             |
| 3.302384315                        | 2.114448021                                 | 0.380058929                               | 5.538437222                       | 1.18384048                              |
| 10.59038792                        | 2.829220086                                 | 0.325108108                               | 6.368026989                       | 2.515949552                             |
| 6.697511081                        | 2.548266866                                 | 0.38074303                                | 6.740741243                       | 1.902149949                             |
| 9.383052631                        | 2.694296744                                 | 0.320100432                               | 6.702218566                       | 2.396485991                             |
| 2.139110231                        | 1.807018455                                 | 0.361116665                               | 4.698113941                       | 0.855599358                             |
| 20.40682262                        | 3.226120022                                 | 0.248942928                               | 7.321778466                       | 3.525140871                             |
| 18.53709319                        | 3.178934887                                 | 0.266993102                               | 7.452612501                       | 3.359889959                             |
| 32.45314352                        | 3.492375178                                 | 0.202416991                               | 7.921832528                       | 4.544338282                             |
| 10.5059411                         | 2.794226126                                 | 0.326371179                               | 6.910555277                       | 2.500124532                             |
| 5.676464614                        | 2.405266244                                 | 0.38472916                                | 6.547026133                       | 1.852080516                             |
| 7.117808216                        | 2.592102823                                 | 0.372842923                               | 6.663329177                       | 2.02311226                              |
| 6.77435633                         | 2.504166549                                 | 0.367152231                               | 6.407258394                       | 1.678690648                             |
| 2.771549378                        | 1.995737133                                 | 0.423857302                               | 5.506988512                       | 1.118283885                             |
| 3.578967453                        | 2.174755392                                 | 0.405352153                               | 5.804936356                       | 1.348941494                             |
| 18.11082873                        | 2.920552033                                 | 0.237282943                               | 5.390592712                       | 3.519294773                             |
| 11.08656326                        | 2.826255208                                 | 0.342123273                               | 7.109950357                       | 2.466271849                             |
| 27.93238002                        | 3.272634836                                 | 0.185273102                               | 6.345292886                       | 4.317231469                             |
| 6.612260963                        | 2.551499749                                 | 0.36614749                                | 6.604225784                       | 1.789371802                             |
| 14.23768151                        | 2.97519744                                  | 0.295436892                               | 6.269135125                       | 2.949483723                             |
| 5.780589228                        | 2.448373271                                 | 0.406961893                               | 6.554129742                       | 1.756008443                             |
| 6.801837695                        | 2.528901497                                 | 0.396152689                               | 6.664452187                       | 1.848111729                             |
| 10.11061691                        | 2.803288358                                 | 0.328800208                               | 6.78082386                        | 2.429486748                             |
| 2.680875618                        | 1.997684301                                 | 0.387432003                               | 5.281098462                       | 1.056386019                             |
| 1.961997541                        | 1.811414646                                 | 0.383173125                               | 4.885387874                       | 0.871181893                             |
| 3.181159804                        | 1.960885076                                 | 0.364765546                               | 4.992771514                       | 1.003676628                             |
| 19.94740128                        | 3.199940852                                 | 0.264136112                               | 7.2289556                         | 3.406934763                             |
| 10.28562368                        | 2.800927823                                 | 0.332612882                               | 6.564011564                       | 2.466073597                             |
| 9.845764357                        | 2.727689628                                 | 0.358526959                               | 5.980805665                       | 2.359549677                             |
| 9.055364817                        | 2.721828645                                 | 0.344758541                               | 6.811112997                       | 2.30863835                              |
| 5.111554804                        | 2.372647563                                 | 0.375419765                               | 6.034087923                       | 1.519497211                             |
| 24.58115264                        | 3.24421724                                  | 0.230736132                               | 6.641996563                       | 3.942535869                             |
| 14.38694631                        | 3.029126919                                 | 0.313546522                               | 7.442895001                       | 2.833440482                             |
| 5.910594262                        | 2.412493917                                 | 0.377993059                               | 6.151349548                       | 1.571397369                             |
| 25.27594115                        | 2.759302214                                 | 0.23389722                                | 4.616898551                       | 4.058655661                             |
| 3.366039437                        | 2.119290526                                 | 0.410586616                               | 5.60952458                        | 1.214878379                             |
| 5.788818808                        | 2.440631038                                 | 0.413091262                               | 6.313132052                       | 1.708519818                             |
| 9.812537525                        | 2.764535782                                 | 0.348016984                               | 6.558044833                       | 2.419797346                             |
| 25.12776643                        | 3.39076903                                  | 0.234827566                               | 7.770755367                       | 3.957507615                             |
| 9.099001844                        | 2.435601338                                 | 0.330162744                               | 4.687056337                       | 2.387458816                             |
| 17.83333333                        | 2.215647948                                 | 0.228089102                               | 3.806100279                       | 3.412698413                             |
| 6.43221328                         | 2.514309005                                 | 0.360511795                               | 6.413842403                       | 1.711972559                             |
| 12.70150153                        | 2.909976492                                 | 0.312517165                               | 6.654086026                       | 2.700973721                             |
| 7.971697185                        | 2.625120911                                 | 0.367851603                               | 6.462255423                       | 2.105600476                             |
| 3.988533078                        | 2.22160357                                  | 0.418944793                               | 6.187155613                       | 1.388967138                             |
| 2.707983486                        | 2.002049869                                 | 0.38603493                                | 5.344541311                       | 1.056165701                             |
| 41.85109744                        | 3.331242808                                 | 0.172909867                               | 5.728228381                       | 5.217318762                             |
| 15.89683584                        | 3.08622108                                  | 0.291845437                               | 7.356525173                       | 3.073719805                             |
| 17.7791719                         | 2.365393535                                 | 0.224597923                               | 3.81135476                        | 3.393899904                             |
| 21.20817625                        | 3.159748578                                 | 0.25200073                                | 6.843995629                       | 3.716534825                             |
| 8.923143507                        | 2.678021625                                 | 0.354011099                               | 6.575676696                       | 2.274135226                             |

| log.sigma.4.0.mm.3D_glcm_DifferenceVariance | log.sigma.4.0.mm.3D_glcm_ldn | log.sigma.4.0.mm.3D_glcm_ldm | log.sigma.4.0.mm.3D_glcm_Correlation | log.sigma.4.0.mm.3D_glcm_Autocorrelation |
|---------------------------------------------|------------------------------|------------------------------|--------------------------------------|------------------------------------------|
| 3.480036283                                 | 0.905294986                  | 0.337972517                  | 0.708716518                          | 132.4767517                              |
| 2.462573171                                 | 0.923433093                  | 0.474924901                  | 0.721459371                          | 120.6809044                              |
| 3.294705854                                 | 0.873875567                  | 0.309389546                  | 0.516972096                          | 47.95470618                              |
| 5.828621982                                 | 0.924539959                  | 0.346169019                  | 0.586781674                          | 187.0573961                              |
| 11.40580283                                 | 0.859720422                  | 0.171504216                  | 0.501561458                          | 138.3670358                              |
| 3.583307247                                 | 0.871671965                  | 0.360157288                  | 0.328772928                          | 38.63135374                              |
| 2.989153542                                 | 0.84569577                   | 0.347723913                  | 0.186093533                          | 21.88680215                              |
| 6.944666859                                 | 0.893645796                  | 0.27514966                   | 0.4240282                            | 84.4344568                               |
| 16.82541265                                 | 0.894848508                  | 0.206711271                  | 0.747844021                          | 407.7364543                              |
| 2.094782965                                 | 0.940078365                  | 0.472362334                  | 0.70968659                           | 152.6050601                              |
| 4.04442085                                  | 0.885327542                  | 0.326152193                  | 0.283246459                          | 55.50735779                              |
| 3.204671785                                 | 0.919781917                  | 0.369022527                  | 0.647253834                          | 107.4991705                              |
| 3.539046661                                 | 0.916832839                  | 0.394992016                  | 0.502931855                          | 52.13116939                              |
| 5.060322375                                 | 0.896735954                  | 0.332593887                  | 0.509424986                          | 60.70771842                              |
| 5.665068962                                 | 0.881335699                  | 0.274869286                  | 0.444378642                          | 64.68456263                              |
| 1.182917747                                 | 0.973985472                  | 0.733548136                  | 0.783317307                          | 166.4908375                              |
| 6.388981932                                 | 0.852181823                  | 0.21674205                   | 0.380375006                          | 67.91820043                              |
| 3.446277508                                 | 0.922502074                  | 0.391904174                  | 0.555757698                          | 70.8301192                               |
| 9.838771439                                 | 0.852246666                  | 0.202580116                  | 0.437525191                          | 82.51415313                              |
| 1.511441994                                 | 0.936163149                  | 0.5438091                    | 0.803171564                          | 92.21595751                              |
| 1.31661695                                  | 0.953229441                  | 0.600807361                  | 0.756335775                          | 104.226721                               |
| 4.690441376                                 | 0.903721026                  | 0.353144713                  | 0.533575158                          | 70.53561635                              |
| 1.578253711                                 | 0.949237303                  | 0.561280932                  | 0.764494978                          | 141.9029839                              |
| 7.278998235                                 | 0.878589736                  | 0.217296925                  | 0.70958998                           | 244.2101848                              |
| 1.568274456                                 | 0.928232521                  | 0.511494418                  | 0.705531174                          | 68.59388592                              |
| 3.905813625                                 | 0.880401156                  | 0.323203792                  | 0.475089594                          | 62.63381391                              |
| 1.773208807                                 | 0.949309209                  | 0.551205284                  | 0.67559049                           | 91.12698392                              |
| 1.510496276                                 | 0.969377934                  | 0.643578891                  | 0.81143687                           | 154.4329391                              |
| 3.223757408                                 | 0.952042611                  | 0.542392001                  | 0.738518458                          | 185.3761411                              |
| 2.139260089                                 | 0.93222022                   | 0.499947516                  | 0.796843312                          | 139.0963549                              |
| 1.665123544                                 | 0.953343939                  | 0.582536885                  | 0.75702846                           | 125.7121465                              |
| 1.944425596                                 | 0.963355807                  | 0.628073427                  | 0.711059508                          | 139.2151417                              |
| 4.228377701                                 | 0.915066441                  | 0.351361108                  | 0.634103871                          | 102.143612                               |
| 7.501997863                                 | 0.806511767                  | 0.180110515                  | 0.165841967                          | 61.12628205                              |
| 8.766114018                                 | 0.8676198                    | 0.202436514                  | 0.439946673                          | 139.345295                               |
| 4.093125159                                 | 0.902674788                  | 0.337593865                  | 0.520250218                          | 106.149371                               |
| 1.599622185                                 | 0.955587473                  | 0.635524799                  | 0.797972474                          | 144.4651204                              |
| 2.228804722                                 | 0.939923145                  | 0.498029292                  | 0.736539936                          | 87.63490168                              |
| 7.42414406                                  | 0.883946422                  | 0.258949678                  | 0.577259872                          | 103.8080699                              |
| 3.580220681                                 | 0.893791808                  | 0.327072902                  | 0.650923722                          | 86.30971708                              |
| 2.947377735                                 | 0.930821679                  | 0.409768522                  | 0.723952333                          | 169.9534902                              |
| 5.88060849                                  | 0.901958186                  | 0.312450015                  | 0.403337394                          | 88.11487467                              |
| 4.329513385                                 | 0.888099319                  | 0.319156086                  | 0.37529773                           | 73.96990688                              |
| 6.455739369                                 | 0.903823153                  | 0.297088398                  | 0.480929441                          | 71.95628269                              |
| 4.881762012                                 | 0.906318297                  | 0.305373762                  | 0.633900164                          | 104.6458718                              |
| 0.713400851                                 | 0.958949853                  | 0.725253133                  | 0.830131879                          | 91.50014513                              |
| 8.391251127                                 | 0.935023941                  | 0.29619153                   | 0.618744196                          | 159.2043359                              |
| 5.042908545                                 | 0.860343399                  | 0.320984038                  | 0.323229254                          | 33.90328724                              |
| 9.506121728                                 | 0.800918397                  | 0.18730911                   | 0.000959875                          | 56.88722111                              |
| 14.46329629                                 | 0.845547139                  | 0.153996814                  | 0.420856311                          | 179.7046975                              |
| 1.864035357                                 | 0.94996986                   | 0.582216621                  | 0.761599693                          | 127.4348955                              |
| 4.088149178                                 | 0.880132013                  | 0.330305851                  | 0.26141721                           | 42.35928546                              |
| 2.955353111                                 | 0.930502668                  | 0.41808012                   | 0.702506731                          | 145.3694898                              |
| 3.35036295                                  | 0.88438967                   | 0.332408681                  | 0.615834826                          | 61.74514478                              |
| 1.384047681                                 | 0.963407054                  | 0.678535812                  | 0.791698861                          | 132.6238229                              |
| 7.637868454                                 | 0.866672579                  | 0.246636197                  | 0.396383515                          | 87.31238337                              |
| 6.789803385                                 | 0.898989868                  | 0.258340076                  | 0.405404728                          | 132.3603573                              |
| 10.67270426                                 | 0.865481793                  | 0.195311387                  | 0.497574946                          | 172.7501842                              |
| 4.103010046                                 | 0.899977062                  | 0.324322763                  | 0.588992677                          | 88.87858933                              |
| 2.12739603                                  | 0.907111995                  | 0.396105642                  | 0.719207564                          | 86.86654997                              |
| 2.954076473                                 | 0.913367691                  | 0.385247849                  | 0.627152244                          | 83.88709492                              |
| 3.88013708                                  | 0.953146124                  | 0.505974014                  | 0.713273553                          | 201.0988146                              |
| 1.45657859                                  | 0.952165146                  | 0.582260468                  | 0.741543019                          | 91.7763927                               |
| 1.688736825                                 | 0.923065944                  | 0.519886521                  | 0.717375409                          | 88.87726347                              |
| 5.412043366                                 | 0.839422875                  | 0.224286613                  | 0.328083521                          | 63.93057225                              |
| 4.764869477                                 | 0.915705671                  | 0.349325989                  | 0.586331067                          | 121.6771341                              |
| 8.485066334                                 | 0.834862051                  | 0.197038379                  | 0.302438697                          | 92.77698518                              |
| 3.338803316                                 | 0.93250379                   | 0.463349957                  | 0.761148297                          | 112.3995013                              |
| 5.364468368                                 | 0.863258502                  | 0.293651312                  | 0.329786566                          | 42.17862356                              |
| 2.618468728                                 | 0.924077202                  | 0.437776089                  | 0.694884502                          | 103.9801885                              |
| 3.256659056                                 | 0.924435517                  | 0.435322031                  | 0.665095316                          | 143.2749544                              |
| 4.081947846                                 | 0.898518981                  | 0.336681333                  | 0.463369167                          | 72.01956086                              |
| 1.537675805                                 | 0.954921154                  | 0.610412293                  | 0.803805536                          | 138.8226712                              |
| 1.185854921                                 | 0.949188596                  | 0.660930069                  | 0.815781561                          | 83.93777955                              |
| 2.152460611                                 | 0.968629182                  | 0.654640588                  | 0.717661934                          | 162.7213216                              |
| 7.694702951                                 | 0.88850484                   | 0.277454131                  | 0.36833716                           | 108.8502413                              |
| 4.003478199                                 | 0.89713739                   | 0.337356864                  | 0.360827798                          | 66.92561849                              |
| 4.168918731                                 | 0.887058457                  | 0.345637631                  | 0.314259606                          | 23.28028061                              |
| 3.529399804                                 | 0.906691259                  | 0.348300114                  | 0.498442598                          | 128.4879983                              |
| 2.747306808                                 | 0.946118174                  | 0.511662054                  | 0.682873973                          | 178.1925552                              |
| 8.192672591                                 | 0.847651045                  | 0.218527405                  | 0.303197201                          | 87.1717264                               |
| 6.185580716                                 | 0.913646149                  | 0.311394988                  | 0.556318612                          | 178.1569124                              |
| 3.342585958                                 | 0.95174638                   | 0.519011749                  | 0.698483558                          | 250.7517453                              |
| 8.309873811                                 | 0.804699834                  | 0.198037892                  | 0.115848982                          | 70.74862659                              |
| 1.853793477                                 | 0.943821606                  | 0.56705836                   | 0.715119838                          | 91.87818374                              |
| 2.771709149                                 | 0.92943316                   | 0.457091728                  | 0.541403259                          | 81.31358946                              |
| 3.87401633                                  | 0.898529081                  | 0.329442744                  | 0.459352489                          | 63.34363042                              |
| 9.132023766                                 | 0.887135763                  | 0.225349122                  | 0.415810319                          | 166.6285654                              |
| 3.031292578                                 | 0.823703643                  | 0.322577448                  | 0.012336485                          | 26.48813509                              |
| 5.979339884                                 | 0.785966283                  | 0.264425246                  | 0.04087903                           | 30.16666667                              |
| 3.41813708                                  | 0.944011687                  | 0.487049861                  | 0.749421213                          | 188.2781536                              |
| 5.134197822                                 | 0.884587027                  | 0.31683291                   | 0.533501072                          | 56.5811882                               |
| 3.373381402                                 | 0.897614071                  | 0.38465886                   | 0.521665071                          | 65.97316176                              |
| 1.999457597                                 | 0.936061424                  | 0.51606955                   | 0.776047739                          | 118.1288281                              |
| 1.56828406                                  | 0.952955751                  | 0.611423503                  | 0.789741405                          | 117.9754419                              |
| 12.38707797                                 | 0.853487717                  | 0.169469365                  | 0.147353797                          | 156.1381825                              |
| 6.229191504                                 | 0.897259115                  | 0.280850462                  | 0.554834067                          | 114.9238434                              |
| 5.609685706                                 | 0.786768906                  | 0.267394823                  | 0.093994857                          | 26.98637559                              |
| 6.978378561                                 | 0.881889432                  | 0.220033056                  | 0.609156349                          | 178.5106916                              |
| 3.635519431                                 | 0.911630313                  | 0.352783217                  | 0.633874415                          | 132.6436154                              |

| log.sigma.4.0.mm.3D_glc_m_SumEntropy | log.sigma.4.0.mm.3D_glc_m_AverageIntensity | log.sigma.4.0.mm.3D_glc_m_Energy | log.sigma.4.0.mm.3D_glc_m_SumSquares | log.sigma.4.0.mm.3D_glc_m_ClusterProminence |
|--------------------------------------|--------------------------------------------|----------------------------------|--------------------------------------|---------------------------------------------|
| 4.745036878                          | 11.02079693                                | 0.01004389                       | 15.54609285                          | 5981.954756                                 |
| 4.361501662                          | 10.67597258                                | 0.023193483                      | 9.279526527                          | 2511.22132                                  |
| 4.282681833                          | 6.533587755                                | 0.015826631                      | 10.08391309                          | 2643.018217                                 |
| 4.801365591                          | 13.3607469                                 | 0.009415469                      | 15.83940023                          | 7872.283569                                 |
| 4.750637751                          | 11.04477528                                | 0.011213291                      | 36.0890125                           | 29900.20374                                 |
| 3.940961527                          | 6.038808777                                | 0.018947306                      | 6.57008519                           | 918.8163965                                 |
| 3.352591121                          | 4.587578897                                | 0.035664347                      | 4.962894976                          | 468.9490944                                 |
| 4.594771755                          | 8.831355123                                | 0.008804042                      | 15.141372                            | 7073.523696                                 |
| 5.846888563                          | 18.90471372                                | 0.002573075                      | 81.7678335                           | 165424.5646                                 |
| 4.370273196                          | 12.12392504                                | 0.018988661                      | 7.879928927                          | 2394.521481                                 |
| 4.047539247                          | 7.305198643                                | 0.016614758                      | 7.403892678                          | 1283.00051                                  |
| 4.597817592                          | 10.00391057                                | 0.010976375                      | 11.4035553                           | 3816.605137                                 |
| 4.229126613                          | 6.936154743                                | 0.016140334                      | 7.935802617                          | 2364.13473                                  |
| 4.501090498                          | 7.376097863                                | 0.011566522                      | 12.33540912                          | 5148.440573                                 |
| 4.55474652                           | 7.658198836                                | 0.009296665                      | 13.6514144                           | 4589.32926                                  |
| 3.320664205                          | 12.78422825                                | 0.134961186                      | 3.888094049                          | 1622.098512                                 |
| 4.55964908                           | 7.860933371                                | 0.010067641                      | 16.95774733                          | 5200.992555                                 |
| 4.396371617                          | 8.120163589                                | 0.012828732                      | 8.797240084                          | 2259.155668                                 |
| 4.789058984                          | 8.433988564                                | 0.008819416                      | 26.23899109                          | 13941.53153                                 |
| 4.290105418                          | 9.266865054                                | 0.028447001                      | 7.883058799                          | 1726.473602                                 |
| 3.872899952                          | 10.02200646                                | 0.055780255                      | 4.99455892                           | 951.2941833                                 |
| 4.505467531                          | 8.014308262                                | 0.012781851                      | 11.66790957                          | 5029.341418                                 |
| 4.115067904                          | 11.70186962                                | 0.03533768                       | 6.484718169                          | 2092.013234                                 |
| 4.918132738                          | 14.72613141                                | 0.01121747                       | 38.98662553                          | 35857.66125                                 |
| 4.09787195                           | 8.032968052                                | 0.024851127                      | 5.738674997                          | 1127.61943                                  |
| 4.335269574                          | 7.609872836                                | 0.012228064                      | 9.892774947                          | 1941.093243                                 |
| 3.966409498                          | 9.359742802                                | 0.041165869                      | 5.201988247                          | 1245.821598                                 |
| 3.752964933                          | 12.20905234                                | 0.09892257                       | 6.611826259                          | 1937.871057                                 |
| 4.163559428                          | 13.31976944                                | 0.067077708                      | 10.76352523                          | 4160.275859                                 |
| 4.409568602                          | 11.42025162                                | 0.029428281                      | 10.85112741                          | 3700.920887                                 |
| 4.013850135                          | 10.99914252                                | 0.051099008                      | 6.231781188                          | 1475.303778                                 |
| 3.783677921                          | 11.63430523                                | 0.07728196                       | 5.409348577                          | 1489.295194                                 |
| 4.708619362                          | 9.66655678                                 | 0.009775534                      | 13.70658505                          | 4789.913701                                 |
| 2.217948636                          | 7.587820513                                | 0.125080128                      | 18.63997596                          | 4392.995635                                 |
| 4.563159223                          | 11.35799719                                | 0.012046812                      | 23.36217606                          | 11441.98041                                 |
| 4.497758279                          | 10.03355063                                | 0.010230466                      | 10.54778295                          | 2795.119829                                 |
| 3.764744261                          | 11.79953522                                | 0.082180694                      | 6.549653048                          | 2066.706435                                 |
| 4.380632334                          | 9.014596944                                | 0.022858954                      | 8.626722                             | 2082.540549                                 |
| 4.966942976                          | 9.49772862                                 | 0.007783164                      | 23.44478162                          | 12750.60333                                 |
| 4.642891095                          | 8.792673943                                | 0.009600897                      | 13.79087177                          | 4427.421524                                 |
| 4.612631837                          | 12.69676706                                | 0.013719897                      | 12.04600722                          | 4965.1349                                   |
| 4.342923741                          | 9.134486273                                | 0.013401264                      | 11.65109027                          | 5148.803272                                 |
| 4.312966064                          | 8.401469108                                | 0.011205159                      | 8.996426171                          | 1861.79909                                  |
| 4.587093003                          | 8.047873775                                | 0.010245108                      | 15.01916353                          | 8003.664003                                 |
| 4.790177998                          | 9.680514929                                | 0.008322891                      | 17.2555715                           | 12876.69704                                 |
| 3.268263368                          | 9.413277355                                | 0.121915771                      | 3.464510761                          | 690.2127688                                 |
| 5.002787667                          | 12.15472908                                | 0.006700008                      | 24.87919564                          | 42167.17662                                 |
| 4.126666182                          | 5.549642389                                | 0.016836503                      | 9.330155398                          | 2055.076126                                 |
| 2.766685634                          | 7.536589799                                | 0.077013585                      | 15.10581398                          | 2529.307092                                 |
| 5.006311627                          | 12.76761033                                | 0.008593425                      | 40.90746467                          | 30213.01083                                 |
| 4.020283358                          | 11.05113944                                | 0.060091051                      | 6.956558636                          | 1811.86744                                  |
| 3.991223025                          | 6.366688804                                | 0.017360968                      | 7.11825978                           | 1078.681235                                 |
| 4.551459709                          | 11.72369351                                | 0.014799072                      | 11.2694814                           | 3478.789006                                 |
| 4.542272219                          | 7.362634024                                | 0.011188173                      | 12.22346505                          | 3592.562043                                 |
| 3.587077767                          | 11.33639774                                | 0.108668392                      | 5.178793368                          | 1558.913095                                 |
| 4.690707158                          | 8.982772043                                | 0.00759948                       | 16.81295161                          | 5528.563146                                 |
| 4.672013208                          | 11.23690774                                | 0.007654996                      | 15.67513945                          | 6298.687584                                 |
| 5.158632408                          | 12.52887935                                | 0.004828502                      | 32.73898131                          | 22138.50716                                 |
| 4.607307082                          | 9.013605286                                | 0.010471271                      | 12.87205171                          | 4605.73371                                  |
| 4.496919388                          | 7.843645371                                | 0.013646197                      | 10.17742364                          | 2850.729563                                 |
| 4.418694431                          | 8.825655601                                | 0.012856987                      | 9.549549791                          | 2450.726956                                 |
| 4.48267015                           | 13.89140781                                | 0.032385279                      | 11.97120476                          | 5613.651962                                 |
| 3.984007723                          | 9.368251689                                | 0.042857904                      | 5.397464684                          | 1058.8576                                   |
| 4.122120349                          | 9.181064973                                | 0.029505098                      | 6.366252737                          | 1045.254925                                 |
| 3.90097394                           | 7.712403148                                | 0.025930017                      | 13.49301671                          | 2956.735163                                 |
| 4.665282811                          | 10.66909578                                | 0.010062485                      | 13.38079346                          | 4593.481986                                 |
| 4.40635747                           | 9.311192946                                | 0.013940443                      | 19.88646041                          | 6534.018739                                 |
| 4.595929303                          | 10.08992784                                | 0.022242444                      | 13.894752                            | 5181.912058                                 |
| 4.148441604                          | 6.22239119                                 | 0.016488254                      | 10.56986044                          | 2540.663082                                 |
| 4.459035453                          | 9.867976819                                | 0.015019335                      | 9.486837259                          | 2360.255912                                 |
| 4.500739995                          | 11.6815655                                 | 0.014823149                      | 10.20742346                          | 2931.033676                                 |
| 4.357924407                          | 8.225306485                                | 0.011638428                      | 9.41485889                           | 2388.008789                                 |
| 3.931812741                          | 11.54546394                                | 0.06097858                       | 6.863301802                          | 1743.049816                                 |
| 3.745096664                          | 8.918620707                                | 0.083406797                      | 5.374519758                          | 1250.477573                                 |
| 3.671184995                          | 12.59747168                                | 0.093661856                      | 5.674344024                          | 2065.752006                                 |
| 4.63306285                           | 10.1577568                                 | 0.009188235                      | 15.63210617                          | 5720.79858                                  |
| 4.172190159                          | 7.998907994                                | 0.014477364                      | 8.08209412                           | 1565.580223                                 |
| 3.860870668                          | 4.590473167                                | 0.021163749                      | 7.126841952                          | 1403.360621                                 |
| 4.383415925                          | 11.12632471                                | 0.011783944                      | 9.206044921                          | 2300.264063                                 |
| 4.2017114                            | 13.13992969                                | 0.035880251                      | 8.087245125                          | 2151.883994                                 |
| 4.450052237                          | 9.057166845                                | 0.011498285                      | 17.38977264                          | 5680.629912                                 |
| 4.810238629                          | 13.02993507                                | 0.007928304                      | 16.61138284                          | 7995.699342                                 |
| 4.316284396                          | 15.62389196                                | 0.036554878                      | 9.879171745                          | 4016.963006                                 |
| 3.353276373                          | 8.284989583                                | 0.043379795                      | 14.58059895                          | 2333.355977                                 |
| 4.003597116                          | 9.360668208                                | 0.042711753                      | 5.937143621                          | 1217.186244                                 |
| 4.167015901                          | 8.825763592                                | 0.019175822                      | 6.310314824                          | 1220.078607                                 |
| 4.262723778                          | 7.689646129                                | 0.013915039                      | 9.114817077                          | 2604.6826                                   |
| 4.905111957                          | 12.58807628                                | 0.006010572                      | 22.09646489                          | 12317.79836                                 |
| 3.03971391                           | 5.140715523                                | 0.04471108                       | 4.573536547                          | 213.0388594                                 |
| 2.734671708                          | 5.464285714                                | 0.074766944                      | 9.145975057                          | 765.7258704                                 |
| 4.489701067                          | 13.36422138                                | 0.029530961                      | 12.93882401                          | 5912.18249                                  |
| 4.434594743                          | 7.01016957                                 | 0.013252816                      | 13.77092931                          | 6251.016834                                 |
| 4.268557392                          | 7.851887763                                | 0.014915172                      | 8.30043475                           | 1545.076004                                 |
| 4.427830621                          | 10.54387238                                | 0.02279446                       | 8.947285125                          | 2432.116703                                 |
| 3.955764949                          | 10.62315543                                | 0.066553454                      | 6.476267883                          | 1570.945304                                 |
| 4.128196754                          | 12.39641468                                | 0.020718073                      | 24.58674496                          | 9007.031193                                 |
| 4.856881603                          | 10.24778568                                | 0.006855594                      | 17.83992026                          | 8490.087437                                 |
| 2.736117171                          | 5.078414854                                | 0.078608676                      | 9.700999841                          | 1101.394094                                 |
| 4.826695947                          | 12.73566849                                | 0.009832164                      | 27.55524106                          | 19709.0821                                  |
| 4.514028368                          | 11.17317252                                | 0.013848629                      | 12.23862675                          | 4515.002711                                 |

| log.sigma.4.0.mm.3D_glc_m_SumAverage | log.sigma.4.0.mm.3D_glc_m_lmc2 | log.sigma.4.0.mm.3D_glc_m_lmc1 | log.sigma.4.0.mm.3D_glc_m_DifferenceAverage | log.sigma.4.0.mm.3D_glc_m_Id |
|--------------------------------------|--------------------------------|--------------------------------|---------------------------------------------|------------------------------|
| 22.04159386                          | 0.915339313                    | -0.233878998                   | 2.33995266                                  | 0.418632812                  |
| 21.35194515                          | 0.87181432                     | -0.216830746                   | 1.610276891                                 | 0.530480223                  |
| 13.06717551                          | 0.892139978                    | -0.229606601                   | 2.487156158                                 | 0.396610182                  |
| 26.67744307                          | 0.802770697                    | -0.138274648                   | 2.616656172                                 | 0.423225013                  |
| 21.97244811                          | 0.991831908                    | -0.479294606                   | 4.7592601                                   | 0.270008469                  |
| 12.07761755                          | 0.762033264                    | -0.135389029                   | 2.266530742                                 | 0.435332138                  |
| 9.175157794                          | 0.907880421                    | -0.307228372                   | 2.233582595                                 | 0.427108073                  |
| 17.66271025                          | 0.835332215                    | -0.155486807                   | 3.205526066                                 | 0.363100291                  |
| 37.30036358                          | 0.919586796                    | -0.191528983                   | 4.835605679                                 | 0.296579737                  |
| 24.24785007                          | 0.841492181                    | -0.185680108                   | 1.546910247                                 | 0.527578432                  |
| 14.61039729                          | 0.724233024                    | -0.112640831                   | 2.520999914                                 | 0.407861611                  |
| 20.00782114                          | 0.836397648                    | -0.174355828                   | 2.130606177                                 | 0.443753372                  |
| 13.87230949                          | 0.714819652                    | -0.112958243                   | 2.046585554                                 | 0.464355931                  |
| 14.75219573                          | 0.805362563                    | -0.147134824                   | 2.619510841                                 | 0.411821742                  |
| 15.31639767                          | 0.830383223                    | -0.157451239                   | 3.052973092                                 | 0.363399062                  |
| 25.5684565                           | 0.882998886                    | -0.313791189                   | 0.68418464                                  | 0.749874481                  |
| 15.72186674                          | 0.926700104                    | -0.253775274                   | 3.766607602                                 | 0.313180985                  |
| 16.24032718                          | 0.747424148                    | -0.122962208                   | 2.06105898                                  | 0.462248604                  |
| 16.86797713                          | 0.968048725                    | -0.329752807                   | 4.355003157                                 | 0.297315742                  |
| 18.53373011                          | 0.906482765                    | -0.265253842                   | 1.238002807                                 | 0.587167043                  |
| 20.04401291                          | 0.865649047                    | -0.240305667                   | 1.040115597                                 | 0.635865387                  |
| 16.02861652                          | 0.791627837                    | -0.142875351                   | 2.423377207                                 | 0.429028054                  |
| 23.40373923                          | 0.883467767                    | -0.246271451                   | 1.190182531                                 | 0.600897544                  |
| 29.43212763                          | 0.991930251                    | -0.480676418                   | 3.843871755                                 | 0.314653823                  |
| 16.0659361                           | 0.848528256                    | -0.206153487                   | 1.321082005                                 | 0.558427797                  |
| 15.21974567                          | 0.832711649                    | -0.168148963                   | 2.501496145                                 | 0.407839336                  |
| 18.7194856                           | 0.821956978                    | -0.191682895                   | 1.245875039                                 | 0.59347728                   |
| 24.41773612                          | 0.902286658                    | -0.302474745                   | 0.963681872                                 | 0.675081056                  |
| 26.63925156                          | 0.883370777                    | -0.242959709                   | 1.512343825                                 | 0.591547253                  |
| 22.84050324                          | 0.900823378                    | -0.24730372                    | 1.479466456                                 | 0.553106457                  |
| 21.99828505                          | 0.877824334                    | -0.245801247                   | 1.143668166                                 | 0.620841975                  |
| 23.26824249                          | 0.866109691                    | -0.245882827                   | 1.054615593                                 | 0.659683606                  |
| 19.33311356                          | 0.815319672                    | -0.147925809                   | 2.378761515                                 | 0.429816341                  |
| 15.17564103                          | 0.993831244                    | -0.846201118                   | 4.534615385                                 | 0.28509031                   |
| 22.71599437                          | 0.986572549                    | -0.441112694                   | 4.111402976                                 | 0.299055163                  |
| 20.06710126                          | 0.725317367                    | -0.106812239                   | 2.429483394                                 | 0.418093001                  |
| 23.59907044                          | 0.889920505                    | -0.282680722                   | 0.999543504                                 | 0.667048878                  |
| 18.02919389                          | 0.864914893                    | -0.206740949                   | 1.495482565                                 | 0.55025433                   |
| 18.99454572                          | 0.924381711                    | -0.242044755                   | 3.419608165                                 | 0.348892427                  |
| 17.58534789                          | 0.849038914                    | -0.171970582                   | 2.41902938                                  | 0.409655117                  |
| 25.39353413                          | 0.901320418                    | -0.22854998                    | 1.890938969                                 | 0.477723198                  |
| 16.26897255                          | 0.823906244                    | -0.157441186                   | 2.812926044                                 | 0.394943795                  |
| 16.80293822                          | 0.671877747                    | -0.089742113                   | 2.586570813                                 | 0.402162986                  |
| 16.09197746                          | 0.830238746                    | -0.155502728                   | 2.975834354                                 | 0.382291063                  |
| 19.36102986                          | 0.809633432                    | -0.139781483                   | 2.753948714                                 | 0.390525591                  |
| 18.82655471                          | 0.882458949                    | -0.328186336                   | 0.645413604                                 | 0.742014904                  |
| 24.05735247                          | 0.803098986                    | -0.130733352                   | 3.091412157                                 | 0.379816475                  |
| 11.09928478                          | 0.802021947                    | -0.15333439                    | 2.699981058                                 | 0.403176481                  |
| 15.0731796                           | 0.993439757                    | -0.736259247                   | 4.442582418                                 | 0.289473232                  |
| 25.4863504                           | 0.987179297                    | -0.417623339                   | 5.557015021                                 | 0.24852743                   |
| 22.10227888                          | 0.885081688                    | -0.252244084                   | 1.18384048                                  | 0.622406353                  |
| 12.73337761                          | 0.691220227                    | -0.099576087                   | 2.515949552                                 | 0.411622202                  |
| 23.44738702                          | 0.832843432                    | -0.171867339                   | 1.902149949                                 | 0.484305877                  |
| 14.72526805                          | 0.895251952                    | -0.220907288                   | 2.396485991                                 | 0.415998516                  |
| 22.67279548                          | 0.883405417                    | -0.288256559                   | 0.855599358                                 | 0.703449597                  |
| 17.96554409                          | 0.863162145                    | -0.173224454                   | 3.525140871                                 | 0.339193427                  |
| 22.45455085                          | 0.770670515                    | -0.117784477                   | 3.359889959                                 | 0.348666347                  |
| 25.01374523                          | 0.928791649                    | -0.226033733                   | 4.544338282                                 | 0.289517487                  |
| 18.02721057                          | 0.881568675                    | -0.199697206                   | 2.500124532                                 | 0.407625298                  |
| 15.68729074                          | 0.881729603                    | -0.216195259                   | 1.852080516                                 | 0.468225122                  |
| 17.6513112                           | 0.798148082                    | -0.146469795                   | 2.02311226                                  | 0.457916283                  |
| 27.75881877                          | 0.884814304                    | -0.221288571                   | 1.678690648                                 | 0.556919745                  |
| 18.73650338                          | 0.856915784                    | -0.231429644                   | 1.118283885                                 | 0.619233809                  |
| 18.36212995                          | 0.855351847                    | -0.213725542                   | 1.348941494                                 | 0.569488715                  |
| 15.4248063                           | 0.982777454                    | -0.481908182                   | 3.519294773                                 | 0.321341957                  |
| 21.33819157                          | 0.830015897                    | -0.160183442                   | 2.466271849                                 | 0.425940147                  |
| 18.62238589                          | 0.979107778                    | -0.406656544                   | 4.317231469                                 | 0.294338882                  |
| 20.17985568                          | 0.891464697                    | -0.221057864                   | 1.789371802                                 | 0.522248133                  |
| 12.44478238                          | 0.886123459                    | -0.219964538                   | 2.949483723                                 | 0.378935314                  |
| 19.73595364                          | 0.840196882                    | -0.178795152                   | 1.756008443                                 | 0.499384573                  |
| 23.363131                            | 0.829765764                    | -0.172876544                   | 1.848111729                                 | 0.497113647                  |
| 16.45061297                          | 0.757951891                    | -0.122619897                   | 2.429486748                                 | 0.418088574                  |
| 23.09092789                          | 0.897083124                    | -0.275790843                   | 1.056386019                                 | 0.645416021                  |
| 17.83724141                          | 0.900857829                    | -0.300016442                   | 0.871181893                                 | 0.687601688                  |
| 25.19196058                          | 0.865737913                    | -0.250831379                   | 1.003676628                                 | 0.68228905                   |
| 20.31551361                          | 0.841159182                    | -0.159590432                   | 3.406934763                                 | 0.363333101                  |
| 15.99781599                          | 0.73704816                     | -0.117974064                   | 2.466073597                                 | 0.417166054                  |
| 9.180946334                          | 0.784065209                    | -0.149740739                   | 2.359549677                                 | 0.423361742                  |
| 22.25264943                          | 0.736463433                    | -0.121488227                   | 2.30863835                                  | 0.427367667                  |
| 26.27985939                          | 0.863150431                    | -0.211034337                   | 1.519497211                                 | 0.563177913                  |
| 18.11433369                          | 0.962998835                    | -0.332172724                   | 3.942535869                                 | 0.312847583                  |
| 26.00838644                          | 0.832078003                    | -0.149959269                   | 2.833440482                                 | 0.393885656                  |
| 31.23379339                          | 0.864948849                    | -0.212346728                   | 1.571397369                                 | 0.567592912                  |
| 16.56997917                          | 0.995527991                    | -0.687139023                   | 4.058655661                                 | 0.294749418                  |
| 18.72133642                          | 0.850716464                    | -0.214856745                   | 1.214878379                                 | 0.607249431                  |
| 17.65152718                          | 0.714415598                    | -0.119666577                   | 1.708519818                                 | 0.514309551                  |
| 15.37929226                          | 0.801845543                    | -0.148736812                   | 2.419797346                                 | 0.410694343                  |
| 25.10636334                          | 0.855702007                    | -0.157590205                   | 3.957507615                                 | 0.317468461                  |
| 10.28143105                          | 0.930783138                    | -0.364712609                   | 2.387458816                                 | 0.40774375                   |
| 10.92857143                          | 0.981846474                    | -0.619942234                   | 3.412698413                                 | 0.354662698                  |
| 26.72589252                          | 0.889249796                    | -0.226324738                   | 1.711972559                                 | 0.542338998                  |
| 14.02033914                          | 0.877158509                    | -0.200766239                   | 2.700973721                                 | 0.399953577                  |
| 15.70377553                          | 0.816808056                    | -0.163355615                   | 2.105600476                                 | 0.456498854                  |
| 21.08774476                          | 0.900399242                    | -0.246872545                   | 1.388967138                                 | 0.564529017                  |
| 21.24631086                          | 0.895022801                    | -0.269744378                   | 1.056165701                                 | 0.646341489                  |
| 24.72344287                          | 0.988567645                    | -0.502945372                   | 5.217318762                                 | 0.263810798                  |
| 20.49557136                          | 0.823513611                    | -0.144131572                   | 3.073719805                                 | 0.368263431                  |
| 10.15682971                          | 0.966427549                    | -0.55301395                    | 3.393899904                                 | 0.357614375                  |
| 25.44001113                          | 0.979402674                    | -0.380750107                   | 3.716534825                                 | 0.314490558                  |
| 22.34634504                          | 0.923450921                    | -0.256024882                   | 2.274135226                                 | 0.430581527                  |

| log.sigma.4.0.mm.3D_glcm_ClusterTendency | log.sigma.4.0.mm.3D_firstorder_InterquartileRange | log.sigma.4.0.mm.3D_firstorder_Skewness | log.sigma.4.0.mm.3D_firstorder_Uniformity |
|------------------------------------------|---------------------------------------------------|-----------------------------------------|-------------------------------------------|
| 53.1154421                               | 164.0030136                                       | -0.039111159                            | 0.070264961                               |
| 31.95939464                              | 119.9012442                                       | -0.529734055                            | 0.099201436                               |
| 30.6168678                               | 118.072197                                        | 0.44813257                              | 0.094449232                               |
| 49.39838832                              | 137.9638157                                       | 0.175688296                             | 0.071722679                               |
| 105.103028                               | 195.8142929                                       | 0.461256959                             | 0.051465543                               |
| 17.4533492                               | 99.59862518                                       | 0.415697937                             | 0.105112873                               |
| 11.43340889                              | 84.05536652                                       | 0.254224771                             | 0.130204082                               |
| 43.15139685                              | 138.1914978                                       | 0.621159682                             | 0.070171723                               |
| 280.2719261                              | 295.158041                                        | 0.601241667                             | 0.038124904                               |
| 26.98445675                              | 99.25489998                                       | -0.154786483                            | 0.099689629                               |
| 19.05154553                              | 101.9636078                                       | 0.526851994                             | 0.100780896                               |
| 37.64111424                              | 124.4787407                                       | 0.098001727                             | 0.078982775                               |
| 23.90210386                              | 99.02540207                                       | 0.962314755                             | 0.101701219                               |
| 37.25567266                              | 138.2204247                                       | 0.631045601                             | 0.078763487                               |
| 39.34445878                              | 139.1843786                                       | 0.43312428                              | 0.075670209                               |
| 13.88406049                              | 26.30597556                                       | -1.837924593                            | 0.246262597                               |
| 46.03680511                              | 155.5135193                                       | 0.149668608                             | 0.069336788                               |
| 27.37971318                              | 104.7246761                                       | 0.395487534                             | 0.092213904                               |
| 75.09043592                              | 211.4244328                                       | 0.294760487                             | 0.052107233                               |
| 28.44080004                              | 111.1441691                                       | -0.399989254                            | 0.107593219                               |
| 17.55667487                              | 86.95774126                                       | -0.628901904                            | 0.146351603                               |
| 35.92013232                              | 110.1739769                                       | 0.773214602                             | 0.084398649                               |
| 22.9016504                               | 91.58378601                                       | -0.816688707                            | 0.123482361                               |
| 132.5359087                              | 231.2273712                                       | -0.363763355                            | 0.05217932                                |
| 19.59788827                              | 81.54166508                                       | -0.366282278                            | 0.118194444                               |
| 29.21302683                              | 116.9190941                                       | -0.010882302                            | 0.088526819                               |
| 17.44351892                              | 72.64614296                                       | -0.251115897                            | 0.142787671                               |
| 23.96454669                              | 104.8174725                                       | -0.860726754                            | 0.177271938                               |
| 37.44349678                              | 128.419477                                        | -0.769795841                            | 0.142787683                               |
| 39.027329                                | 136.7014599                                       | -0.565754227                            | 0.096162964                               |
| 21.92011535                              | 97.89595032                                       | -0.552645834                            | 0.136083547                               |
| 18.53590495                              | 73.53532696                                       | -0.756148677                            | 0.172194536                               |
| 44.80522743                              | 147.42136                                         | 0.105937289                             | 0.073009624                               |
| 43.03939103                              | 188.563879                                        | 0.351029581                             | 0.12                                      |
| 67.18517596                              | 171.3011856                                       | -0.000848871                            | 0.061633644                               |
| 32.04737236                              | 119.675808                                        | 0.194252019                             | 0.083660194                               |
| 23.56808738                              | 82.38628332                                       | -1.179813929                            | 0.176809711                               |
| 29.99075805                              | 117.4976673                                       | -0.099836098                            | 0.096826463                               |
| 73.90993098                              | 191.9029427                                       | 0.022497117                             | 0.061887986                               |
| 45.56937138                              | 155.9984055                                       | 0.166001874                             | 0.073693774                               |
| 41.54760137                              | 123.93608                                         | -0.414149062                            | 0.085119077                               |
| 32.64303654                              | 114.7529602                                       | 0.826513871                             | 0.085153726                               |
| 24.74852862                              | 105.5442009                                       | 0.267105696                             | 0.089157791                               |
| 44.32203505                              | 148.313015                                        | 0.688582882                             | 0.073437768                               |
| 56.36919176                              | 122.0181808                                       | 0.711044607                             | 0.075234169                               |
| 12.70533368                              | 51.72062731                                       | -1.370645274                            | 0.231912615                               |
| 76.28123967                              | 138.3360775                                       | 1.231102197                             | 0.068772747                               |
| 24.82442926                              | 119.4198914                                       | 0.609037153                             | 0.094028932                               |
| 30.17049481                              | 140.4310074                                       | -0.063281046                            | 0.107438017                               |
| 115.2040067                              | 235.2517204                                       | -0.082572559                            | 0.048132858                               |
| 24.52385023                              | 101.2324393                                       | -0.66043985                             | 0.140755839                               |
| 17.8826512                               | 99.0612793                                        | 0.683943948                             | 0.109913859                               |
| 38.3804145                               | 132.7241735                                       | -0.310925588                            | 0.086854509                               |
| 39.51080758                              | 142.3767357                                       | 0.010069958                             | 0.077362091                               |
| 18.57606324                              | 47.37003225                                       | -1.346294162                            | 0.212236785                               |
| 46.84498382                              | 163.7043839                                       | 0.183060487                             | 0.06511027                                |
| 43.5048324                               | 144.4862404                                       | 0.405529167                             | 0.071292926                               |
| 97.11992424                              | 190.0951347                                       | -0.225322493                            | 0.051114586                               |
| 40.98226572                              | 128.9027786                                       | 0.356856199                             | 0.076494622                               |
| 35.03322996                              | 125.2114115                                       | 0.26288907                              | 0.084354105                               |
| 31.08039095                              | 104.0838013                                       | 0.380875814                             | 0.09411084                                |
| 40.61284982                              | 119.0307502                                       | -0.260500769                            | 0.104105887                               |
| 18.81830936                              | 72.08501363                                       | -0.619253731                            | 0.136801403                               |
| 21.8860435                               | 98.7344842                                        | -0.391282455                            | 0.119480753                               |
| 35.86123811                              | 127.0156555                                       | -0.126430703                            | 0.102883588                               |
| 42.43661058                              | 128.7797606                                       | -0.122411778                            | 0.07810993                                |
| 51.6134616                               | 167.297226                                        | -0.194442996                            | 0.067029478                               |
| 48.96674704                              | 155.7890563                                       | -0.244198516                            | 0.086258846                               |
| 28.04176026                              | 127.2579346                                       | 0.569156832                             | 0.086507898                               |
| 32.16675981                              | 117.2222524                                       | -0.243233715                            | 0.090110935                               |
| 34.02785615                              | 124.2665739                                       | -0.252656702                            | 0.087899407                               |
| 27.54881865                              | 107.5879517                                       | 0.486279475                             | 0.090525648                               |
| 24.77233159                              | 97.85831559                                       | -0.847637077                            | 0.145879976                               |
| 19.53608149                              | 76.91578756                                       | -1.039530415                            | 0.172865942                               |
| 19.43064245                              | 48.45610285                                       | -0.740734921                            | 0.197705095                               |
| 42.58102341                              | 146.35672                                         | 0.344034713                             | 0.070482013                               |
| 22.0427528                               | 107.7771416                                       | 0.428091996                             | 0.096241151                               |
| 18.66160345                              | 95.37240219                                       | 1.101461008                             | 0.107621173                               |
| 27.76881487                              | 106.0176239                                       | -0.105863209                            | 0.089152788                               |
| 27.2374257                               | 114.3338041                                       | -0.369397369                            | 0.111570411                               |
| 44.97793791                              | 154.7352142                                       | 0.214116389                             | 0.068960858                               |
| 50.55507856                              | 134.3836441                                       | 0.258989716                             | 0.06976912                                |
| 33.35780841                              | 98.36720276                                       | -0.704895508                            | 0.11818276                                |
| 33.04645466                              | 149.2588444                                       | -0.184487338                            | 0.090530697                               |
| 20.38253505                              | 88.60848498                                       | -0.606018989                            | 0.134019353                               |
| 19.45244049                              | 84.50265884                                       | 0.311427381                             | 0.111124608                               |
| 26.64673078                              | 116.1852417                                       | 0.717593443                             | 0.092272471                               |
| 61.25099526                              | 160.2635956                                       | 0.12297448                              | 0.05956111                                |
| 9.195144345                              | 81.95929241                                       | 0.030226815                             | 0.1408                                    |
| 18.75056689                              | 111.0949249                                       | 0.012488685                             | 0.147928994                               |
| 45.24175062                              | 134.4622407                                       | -0.58615818                             | 0.100044472                               |
| 42.38221571                              | 125.5141144                                       | 0.932906737                             | 0.085028566                               |
| 25.23004181                              | 112.7561817                                       | 0.141650204                             | 0.09522929                                |
| 31.80060742                              | 117.1448395                                       | -0.402375105                            | 0.095856492                               |
| 23.19708805                              | 92.01734409                                       | -0.693045867                            | 0.148950662                               |
| 54.27173823                              | 202.3969078                                       | 0.230564604                             | 0.073318216                               |
| 55.4628452                               | 154.0342512                                       | 0.230110067                             | 0.065004325                               |
| 21.02482747                              | 127.0126438                                       | 0.247607658                             | 0.149305556                               |
| 87.84830682                              | 175.0873499                                       | 0.175070391                             | 0.059279612                               |
| 40.0313635                               | 121.1347942                                       | -0.345652761                            | 0.083035714                               |

| log.sigma.4.0.mm.3D_firstorder_MeanAbsoluteDeviation | log.sigma.4.0.mm.3D_firstorder_Energy | log.sigma.4.0.mm.3D_firstorder_RobustMeanAbsoluteDeviation | log.sigma.4.0.mm.3D_firstorder_Median |
|------------------------------------------------------|---------------------------------------|------------------------------------------------------------|---------------------------------------|
| 85.0669373                                           | 11898397.67                           | 64.95881529                                                | -146.9898224                          |
| 63.76691143                                          | 20460054.65                           | 47.97554705                                                | -82.29793549                          |
| 67.40583189                                          | 5654723.538                           | 47.90037852                                                | -175.1813049                          |
| 81.98489814                                          | 37370127.99                           | 57.0111499                                                 | -88.90718079                          |
| 122.348709                                           | 5755030.848                           | 88.04307613                                                | -196.6731873                          |
| 56.20802895                                          | 12798126.35                           | 40.61517497                                                | -227.0264664                          |
| 47.65105604                                          | 970110.5425                           | 34.50812067                                                | -101.246254                           |
| 84.61421008                                          | 23623782.1                            | 58.25402133                                                | -233.1651001                          |
| 172.4298009                                          | 68955412.51                           | 125.0219482                                                | -91.85485077                          |
| 58.06298863                                          | 28880577.52                           | 40.42123631                                                | -80.50794983                          |
| 61.27767836                                          | 18760003.95                           | 42.95451097                                                | -226.3114014                          |
| 72.04920486                                          | 14671515.74                           | 51.89010072                                                | -108.3840408                          |
| 60.34625589                                          | 23010105.93                           | 40.2818313                                                 | -117.3953247                          |
| 77.42100995                                          | 14346980.19                           | 55.58119489                                                | -150.4440231                          |
| 78.14787594                                          | 6808711.101                           | 55.95819641                                                | -100.6278801                          |
| 33.005308                                            | 31011008.82                           | 14.39348034                                                | -3.863708258                          |
| 87.97678694                                          | 12033015.2                            | 65.08049483                                                | -197.1562805                          |
| 61.70677253                                          | 34819966.11                           | 43.18164602                                                | -129.0428009                          |
| 115.4761535                                          | 9701639.89                            | 85.75567974                                                | -197.3247375                          |
| 59.28402646                                          | 22291904.92                           | 44.98685273                                                | -41.42212296                          |
| 47.69640864                                          | 38453155                              | 35.3959826                                                 | -54.49269104                          |
| 70.56820642                                          | 16709771.43                           | 46.74602566                                                | -108.7862473                          |
| 51.8200071                                           | 27608942.86                           | 36.7906501                                                 | -62.38962746                          |
| 126.1172239                                          | 3419478.137                           | 95.28668262                                                | -45.77640152                          |
| 48.83898914                                          | 10769379.99                           | 34.61137067                                                | -82.26128006                          |
| 64.8587845                                           | 12186916.7                            | 47.20720767                                                | -182.7956619                          |
| 45.43606732                                          | 14212834.14                           | 30.18421849                                                | -42.27813721                          |
| 56.76749924                                          | 32062031.29                           | 42.9519926                                                 | -33.29100037                          |
| 70.09526438                                          | 49362101.45                           | 52.91645873                                                | -54.12641144                          |
| 71.24583543                                          | 30942832.61                           | 54.61913104                                                | -90.04536438                          |
| 53.038927                                            | 35256153.1                            | 39.29522862                                                | -51.25076294                          |
| 46.82371255                                          | 50718001.43                           | 31.25175826                                                | -26.90398788                          |
| 79.84504626                                          | 30372258.23                           | 59.08590612                                                | -113.3550262                          |
| 100.4856029                                          | 473963.2184                           | 71.73614433                                                | -163.3451233                          |
| 98.97834684                                          | 5070431.497                           | 68.99741738                                                | -173.6560364                          |
| 68.41346104                                          | 40952007.55                           | 49.78144251                                                | -159.705719                           |
| 52.96194005                                          | 41909499.42                           | 37.04065637                                                | -11.61588573                          |
| 63.98603271                                          | 28132865.83                           | 47.64796389                                                | -48.24596596                          |
| 103.7923937                                          | 9553078.222                           | 78.9630503                                                 | -115.1697159                          |
| 80.77216059                                          | 18133253.67                           | 62.76010999                                                | -160.6260986                          |
| 70.46134366                                          | 11283042.26                           | 50.34667119                                                | -83.67089844                          |
| 76.17001674                                          | 20715829.16                           | 51.25564918                                                | -234.3133698                          |
| 64.04696272                                          | 35137077.28                           | 45.19663103                                                | -196.2046127                          |
| 85.6776662                                           | 20614225.3                            | 61.46775505                                                | -206.7776031                          |
| 78.47814081                                          | 25877421.66                           | 52.01308732                                                | -125.1634293                          |
| 37.98902953                                          | 19804553.23                           | 24.77943226                                                | -9.524876118                          |
| 86.8393075                                           | 47192281.91                           | 57.68873566                                                | -72.8270874                           |
| 70.20145202                                          | 13418036.27                           | 51.16277351                                                | -249.6187592                          |
| 80.16772373                                          | 1132500.893                           | 51.27603781                                                | -202.7724915                          |
| 133.1338708                                          | 9360657.56                            | 99.53516563                                                | -186.695343                           |
| 56.01735999                                          | 34138113.93                           | 41.44796453                                                | -42.85853767                          |
| 57.57106997                                          | 25753986.19                           | 40.73253829                                                | -257.0495911                          |
| 70.22224208                                          | 50739380.25                           | 52.77806395                                                | -84.85575867                          |
| 75.07109728                                          | 4921821.271                           | 56.22565238                                                | -106.9027405                          |
| 43.6668846                                           | 4797470.52                            | 25.22925223                                                | -7.397426128                          |
| 89.01214785                                          | 19163368.96                           | 66.02311641                                                | -220.7451324                          |
| 81.5868644                                           | 41173675.57                           | 57.34454127                                                | -202.3649979                          |
| 113.2949155                                          | 25166218.05                           | 81.1734603                                                 | -175.3867722                          |
| 75.90678104                                          | 11042727.8                            | 53.47711058                                                | -158.6658707                          |
| 67.77227487                                          | 8809058.487                           | 49.60790133                                                | -117.1001358                          |
| 62.38429966                                          | 38045430.81                           | 44.74626036                                                | -153.7805023                          |
| 70.96951433                                          | 81496592.77                           | 49.77999151                                                | -43.86270332                          |
| 46.97052732                                          | 16999136.38                           | 31.99481424                                                | -11.33318281                          |
| 52.82892321                                          | 12906411.83                           | 40.37738467                                                | -48.76030159                          |
| 76.95170359                                          | 3094206.1                             | 55.04192443                                                | -226.7784271                          |
| 74.16047511                                          | 13798674.52                           | 52.97314379                                                | -53.03595543                          |
| 93.42671169                                          | 7406277.97                            | 66.16427716                                                | -231.3578491                          |
| 80.32874757                                          | 56095682.64                           | 62.24693212                                                | -67.52687073                          |
| 71.68221314                                          | 12471329.91                           | 52.58891666                                                | -283.259552                           |
| 63.95705662                                          | 24737570.54                           | 47.69939245                                                | -83.81080627                          |
| 66.20088549                                          | 39912921.3                            | 49.21186518                                                | -90.51725006                          |
| 63.68725036                                          | 25631515.21                           | 44.34812786                                                | -199.584671                           |
| 55.32771215                                          | 49270376.12                           | 41.33255115                                                | -25.00491524                          |
| 48.97147939                                          | 57155467.15                           | 34.36855813                                                | -14.47466087                          |
| 43.39190224                                          | 60535247.54                           | 24.33439062                                                | -2.807829857                          |
| 85.50938032                                          | 25159322                              | 61.91488835                                                | -233.4595566                          |
| 60.75899889                                          | 20653879                              | 42.39636937                                                | -203.6917953                          |
| 59.55797501                                          | 13234635.27                           | 40.55070044                                                | -245.3542328                          |
| 63.75520145                                          | 36740543.54                           | 44.19937723                                                | -181.5780792                          |
| 60.31945472                                          | 34105342.15                           | 45.01938217                                                | -77.71899796                          |
| 84.86910285                                          | 15785803.48                           | 60.05639918                                                | -319.4906616                          |
| 82.1501153                                           | 23803403.66                           | 56.29298897                                                | -133.4272003                          |
| 62.87255656                                          | 41164321.44                           | 42.73430063                                                | -20.43192863                          |
| 80.06145834                                          | 823397.3986                           | 61.8124027                                                 | -138.4853516                          |
| 50.44822929                                          | 33162357.87                           | 36.4978972                                                 | -40.22842789                          |
| 51.08884371                                          | 27737575.68                           | 35.34687914                                                | -62.10471725                          |
| 66.46196933                                          | 14953566.24                           | 46.80677488                                                | -196.8806915                          |
| 96.02739436                                          | 45593332.51                           | 66.84882652                                                | -256.4101257                          |
| 44.74509394                                          | 436771.6453                           | 32.98397462                                                | -74.61532593                          |
| 67.6514015                                           | 610608.7964                           | 47.68851951                                                | -226.797226                           |
| 73.6653892                                           | 48016828.31                           | 54.75551254                                                | -59.39076233                          |
| 79.42302892                                          | 15603548.99                           | 54.27825107                                                | -227.351387                           |
| 60.32368031                                          | 7138775.983                           | 44.16409313                                                | -110.9867897                          |
| 63.25901305                                          | 41180862.06                           | 47.31068075                                                | -68.28237152                          |
| 54.91165843                                          | 48083872.16                           | 39.66333936                                                | -21.66939735                          |
| 107.1585166                                          | 4588354.395                           | 77.93217418                                                | -254.6497803                          |
| 88.81326133                                          | 16509737.61                           | 63.59506121                                                | -108.4344597                          |
| 61.84950124                                          | 838927.7178                           | 42.38517295                                                | -174.8306656                          |
| 108.1802785                                          | 5174951.879                           | 77.92147732                                                | -123.4692459                          |
| 71.79500739                                          | 5422858.498                           | 49.58656851                                                | -93.32356644                          |

| log.sigma.4.0.mm.3D_firstorder_TotalEnergy | log.sigma.4.0.mm.3D_firstorder_Maximum | log.sigma.4.0.mm.3D_firstorder_RootMeanSquared | log.sigma.4.0.mm.3D_firstorder_90Percentile | log.sigma.4.0.mm.3D_firstorder_Minimum |
|--------------------------------------------|----------------------------------------|------------------------------------------------|---------------------------------------------|----------------------------------------|
| 321256737                                  | 99.96715546                            | 181.547653                                     | -25.42246246                                | -402.1663818                           |
| 552421475.4                                | 80.542099                              | 120.7604045                                    | -6.505636597                                | -345.3018188                           |
| 152677535.5                                | 72.58009338                            | 178.7388895                                    | -48.13806763                                | -322.0889587                           |
| 1008993456                                 | 303.0177002                            | 139.0421151                                    | 24.94818993                                 | -415.4494019                           |
| 155385832.9                                | 198.5997925                            | 238.7058932                                    | 2.71758008                                  | -458.2991638                           |
| 345549411.5                                | -37.13017273                           | 229.0225699                                    | -123.6348724                                | -354.6461182                           |
| 26192984.65                                | 46.5824585                             | 117.7230735                                    | -37.05210381                                | -216.9684906                           |
| 6378421116.7                               | 171.7423096                            | 242.7183034                                    | -69.12725067                                | -432.4646606                           |
| 1861796138                                 | 465.4846802                            | 216.1429137                                    | 300.0840149                                 | -450.8868408                           |
| 779775593.1                                | 185.6136475                            | 111.5970109                                    | -1.459043002                                | -352.4763489                           |
| 506520106.6                                | 39.51261902                            | 223.368815                                     | -113.3075829                                | -376.3015747                           |
| 396130925                                  | 220.9015503                            | 139.2161285                                    | 7.904181099                                 | -347.7350464                           |
| 621272860.2                                | 234.7904663                            | 129.7878264                                    | -6.152740479                                | -271.8363342                           |
| 387368465.2                                | 191.2911682                            | 164.8402589                                    | 0.359280865                                 | -316.8174133                           |
| 183835199.7                                | 220.3027496                            | 136.7671389                                    | 23.75663872                                 | -282.5945435                           |
| 837297238.3                                | 270.2464905                            | 53.51602202                                    | 23.78290348                                 | -322.984436                            |
| 324891410.5                                | 74.42803192                            | 235.4818103                                    | -70.92007599                                | -416.6377258                           |
| 940139085                                  | 247.883255                             | 149.7849965                                    | -28.43288116                                | -312.1322632                           |
| 261944277                                  | 140.9952393                            | 230.8803016                                    | -2.755883002                                | -423.4924316                           |
| 601881432.7                                | 127.0044785                            | 89.64382159                                    | 21.9028532                                  | -251.6674194                           |
| 1038235185                                 | 196.1796722                            | 87.04582905                                    | -2.488559294                                | -295.6784058                           |
| 451163828.6                                | 213.5112457                            | 133.5823987                                    | 24.44830742                                 | -292.6655579                           |
| 745441457.3                                | 168.1192322                            | 97.23742808                                    | -1.031205475                                | -340.37677                             |
| 92325909.71                                | 209.6125641                            | 160.3445102                                    | 124.9948074                                 | -411.0493164                           |
| 290773259.8                                | 104.6130829                            | 105.915552                                     | -11.9064661                                 | -271.7014465                           |
| 329046750.8                                | 33.08845139                            | 200.8831222                                    | -83.37728577                                | -357.2341309                           |
| 383746521.7                                | 271.0291138                            | 78.79840878                                    | 4.366541195                                 | -271.8487549                           |
| 865674844.8                                | 362.8189392                            | 90.72809367                                    | 0.26056782                                  | -335.1366272                           |
| 1332776739                                 | 298.9993591                            | 115.2547857                                    | -1.43401587                                 | -376.6217041                           |
| 835456480.6                                | 94.06943512                            | 135.1921749                                    | -9.059690094                                | -373.4647827                           |
| 951916133.6                                | 215.397522                             | 91.60962828                                    | -0.64559263                                 | -312.2226868                           |
| 1369386039                                 | 319.9017944                            | 75.77517545                                    | 3.16991992                                  | -306.4527588                           |
| 820050972.2                                | 243.8424225                            | 147.8725012                                    | 5.057342529                                 | -349.5751953                           |
| 12797006.9                                 | 97.21743011                            | 177.7569911                                    | 15.15165851                                 | -311.4580688                           |
| 136901650.4                                | 144.2784424                            | 211.8279377                                    | -19.8007431                                 | -458.682312                            |
| 1105704204                                 | 108.4156265                            | 175.2103203                                    | -38.81607018                                | -398.2301636                           |
| 1131556484                                 | 172.1067657                            | 79.14267438                                    | 4.269259453                                 | -306.8951111                           |
| 759587377.5                                | 263.9648132                            | 96.32574776                                    | 29.56667595                                 | -273.06604                             |
| 257933112                                  | 211.1940765                            | 172.5119367                                    | 20.72546387                                 | -367.6200256                           |
| 489597849.1                                | 86.23339081                            | 173.7598915                                    | -27.97503052                                | -359.7466431                           |
| 304642141.2                                | 193.5069122                            | 125.6203753                                    | 14.45022182                                 | -395.492981                            |
| 559327387.3                                | 147.6189575                            | 233.1785904                                    | -75.70224762                                | -448.0059204                           |
| 948701086.5                                | 58.58573532                            | 206.4995982                                    | -84.03012238                                | -394.0859375                           |
| 556584083.2                                | 236.3120575                            | 126.6961768                                    | -47.59790649                                | -386.2363586                           |
| 698690384.8                                | 253.595932                             | 212.3431978                                    | 21.07962646                                 | -346.6095886                           |
| 534722937.3                                | 89.75471497                            | 56.87689273                                    | 8.862168694                                 | -230.9388428                           |
| 1274191612                                 | 692.9916992                            | 131.0947266                                    | 74.70014572                                 | -330.4103699                           |
| 362286979.4                                | -2.886508465                           | 242.5923253                                    | -100.0007904                                | -369.7229614                           |
| 30577524.12                                | -1.16582787                            | 226.8861242                                    | -96.06179733                                | -392.796814                            |
| 252737754.1                                | 127.4447556                            | 253.2076083                                    | 14.64256001                                 | -529.4692383                           |
| 921729076.1                                | 198.9941864                            | 91.47231705                                    | 2.189681435                                 | -311.9682312                           |
| 695357627.1                                | 5.269738197                            | 252.7957138                                    | -139.658493                                 | -396.766571                            |
| 1369963267                                 | 207.0952454                            | 126.0193247                                    | 2.940120888                                 | -368.0584412                           |
| 132889174.3                                | 107.5919647                            | 143.5039875                                    | -0.580474758                                | -298.5016785                           |
| 1295308004                                 | 207.0264587                            | 65.14035963                                    | 17.78279591                                 | -279.1293945                           |
| 517410961.9                                | 58.9403801                             | 239.1737578                                    | -74.98406525                                | -448.4560242                           |
| 1111689240                                 | 200.8855133                            | 217.2959223                                    | -57.78683243                                | -461.4717102                           |
| 679487887.3                                | 126.1945724                            | 234.410056                                     | -3.872558498                                | -508.2070618                           |
| 298153650.6                                | 145.415329                             | 176.6186466                                    | -27.48610249                                | -365.0254211                           |
| 237844579.2                                | 124.9061203                            | 137.4902141                                    | 4.566820383                                 | -283.6407471                           |
| 1027226632                                 | 137.9804688                            | 161.7036252                                    | -28.60688171                                | -332.1477051                           |
| 2200408005                                 | 380.2032776                            | 109.6687838                                    | 12.69644022                                 | -388.4277649                           |
| 458976682.4                                | 258.3064575                            | 64.59559706                                    | 39.169133                                   | -236.8457489                           |
| 348473119.4                                | 93.69272614                            | 85.10379162                                    | 14.26923094                                 | -250.240509                            |
| 83543564.69                                | -18.49058342                           | 244.6221165                                    | -111.7402496                                | -406.5330811                           |
| 372564212.1                                | 288.3032532                            | 109.4441231                                    | 52.44294701                                 | -318.0052185                           |
| 199969505.2                                | -17.73300552                           | 265.5861078                                    | -90.21833344                                | -496.0834045                           |
| 1514583431                                 | 246.7929077                            | 127.2002011                                    | 10.34474068                                 | -322.1180115                           |
| 336725907.4                                | -48.80208969                           | 295.3169437                                    | -164.6295319                                | -426.1933289                           |
| 667914404.6                                | 161.9175415                            | 117.492331                                     | 8.512089825                                 | -309.5429688                           |
| 1077648875                                 | 144.859436                             | 123.923485                                     | 2.5528584                                   | -351.6817627                           |
| 692050910.8                                | 99.61326599                            | 212.6158371                                    | -96.15321503                                | -383.5992737                           |
| 1330300155                                 | 199.5443573                            | 83.55700793                                    | 7.587287617                                 | -321.4811707                           |
| 1543197613                                 | 117.4398727                            | 72.63308217                                    | 9.007706738                                 | -247.8919678                           |
| 1634451684                                 | 383.3588562                            | 64.57074671                                    | 24.58987923                                 | -306.4451294                           |
| 679301694                                  | 129.9020538                            | 237.5100753                                    | -64.47983742                                | -473.3830872                           |
| 557654733                                  | 80.71800232                            | 212.8229177                                    | -98.8900795                                 | -383.7982178                           |
| 357335152.4                                | 56.97098541                            | 243.0703462                                    | -137.1033417                                | -349.4286804                           |
| 991994675.6                                | 70.64757538                            | 200.602989                                     | -81.46591339                                | -428.9928284                           |
| 920844238.1                                | 223.7549286                            | 112.3072678                                    | -3.296216249                                | -389.0079956                           |
| 426216693.8                                | -66.57936096                           | 325.4919197                                    | -157.5737335                                | -543.6517944                           |
| 642691898.7                                | 227.4596558                            | 165.8866653                                    | 11.1918993                                  | -435.5032349                           |
| 1111436679                                 | 285.6509094                            | 91.38629518                                    | 30.18842278                                 | -407.1156311                           |
| 22231729.76                                | 15.23070049                            | 162.9760915                                    | 4.902193069                                 | -340.0900269                           |
| 895383662.6                                | 178.3063965                            | 81.75123475                                    | 8.537232018                                 | -267.1477356                           |
| 748914543.5                                | 242.7722321                            | 88.93370125                                    | 20.38674431                                 | -263.7536011                           |
| 403746288.6                                | 119.0938187                            | 202.4072001                                    | -78.35103149                                | -357.499054                            |
| 1231019978                                 | 145.9934845                            | 278.2229948                                    | -94.89611359                                | -567.6629028                           |
| 11792834.42                                | 29.50790787                            | 93.46353784                                    | -7.762251163                                | -199.4761353                           |
| 16486437.5                                 | -82.09343719                           | 216.7254194                                    | -103.4370483                                | -337.2879333                           |
| 1296454364                                 | 255.4511871                            | 118.3349393                                    | 7.684022522                                 | -392.2811279                           |
| 421295822.7                                | 80.90744781                            | 226.5556527                                    | -50.5683773                                 | -353.3462219                           |
| 192746951.5                                | 109.7205811                            | 130.9981648                                    | -18.22396469                                | -278.9379272                           |
| 1111883276                                 | 138.3748016                            | 106.189685                                     | 13.71840229                                 | -322.3433838                           |
| 1298264548                                 | 186.6726074                            | 81.5963956                                     | 8.392381573                                 | -280.5049744                           |
| 123885568.7                                | 125.3065643                            | 269.8772233                                    | -78.91221466                                | -529.3670044                           |
| 445762915.6                                | 228.1257019                            | 155.8172837                                    | 28.61146526                                 | -372.095459                            |
| 22651048.38                                | -36.20220947                           | 186.9634231                                    | -46.89688034                                | -284.0093384                           |
| 139723700.7                                | 198.5099945                            | 178.1801646                                    | 72.42335815                                 | -431.6073608                           |
| 146417179.4                                | 160.4035797                            | 139.1666331                                    | 0.308496007                                 | -362.8056335                           |

| log.sigma.4.0.mm.3D_firstorder_Entropy | log.sigma.4.0.mm.3D_firstorder_StandardDeviation | log.sigma.4.0.mm.3D_firstorder_Range | log.sigma.4.0.mm.3D_firstorder_Variance | log.sigma.4.0.mm.3D_firstorder_10Percentile |
|----------------------------------------|--------------------------------------------------|--------------------------------------|-----------------------------------------|---------------------------------------------|
| 3.979441953                            | 100.8280166                                      | 502.1335373                          | 10166.28894                             | -281.1607056                                |
| 3.541139554                            | 76.59159553                                      | 425.8439178                          | 5866.272505                             | -202.3039886                                |
| 3.640388102                            | 83.11362568                                      | 394.6690521                          | 6907.874774                             | -259.2323853                                |
| 4.0531991                              | 103.3183348                                      | 718.4671021                          | 10674.67831                             | -227.3903656                                |
| 4.422531102                            | 151.0492959                                      | 656.8989563                          | 22815.88979                             | -375.5834961                                |
| 3.417281922                            | 68.31910263                                      | 317.5159454                          | 4667.499784                             | -303.9363007                                |
| 3.086097312                            | 58.41227476                                      | 263.5509491                          | 3411.993842                             | -177.8554794                                |
| 4.05492177                             | 107.2055016                                      | 604.2069702                          | 11493.01958                             | -345.671051                                 |
| 4.905095752                            | 211.2253759                                      | 916.371521                           | 44616.15943                             | -288.4414063                                |
| 3.578191404                            | 73.11353088                                      | 538.0899963                          | 5345.588398                             | -179.4139587                                |
| 3.574163483                            | 75.73719085                                      | 415.8141937                          | 5736.122079                             | -298.7051697                                |
| 3.836800531                            | 88.88888216                                      | 568.6365967                          | 7901.233371                             | -217.3455719                                |
| 3.57955867                             | 77.99679567                                      | 506.6268005                          | 6083.500135                             | -189.8006973                                |
| 3.865797503                            | 95.17015437                                      | 508.1085815                          | 9057.358282                             | -244.5395706                                |
| 3.903817103                            | 96.00081759                                      | 502.8972931                          | 9216.156978                             | -223.511763                                 |
| 2.621791277                            | 50.81562387                                      | 593.2309265                          | 2582.227629                             | -80.22993469                                |
| 4.020420544                            | 105.9669374                                      | 491.0657578                          | 11228.99182                             | -352.6344238                                |
| 3.656359968                            | 77.98796661                                      | 560.0155182                          | 6082.122937                             | -228.425264                                 |
| 4.351561773                            | 137.7275608                                      | 564.4876709                          | 18968.88102                             | -364.6334045                                |
| 3.412962054                            | 69.90589948                                      | 378.6718979                          | 4886.834782                             | -158.3753708                                |
| 3.087120435                            | 58.15799854                                      | 491.858078                           | 3382.352795                             | -147.2122162                                |
| 3.833374456                            | 92.02930589                                      | 506.1768036                          | 8469.393142                             | -206.334787                                 |
| 3.29471499                             | 65.45265325                                      | 508.4960022                          | 4284.049818                             | -154.7272263                                |
| 4.406666474                            | 148.9451988                                      | 620.6618805                          | 22184.67225                             | -262.256134                                 |
| 3.290502171                            | 60.9603157                                       | 376.3145294                          | 3716.160091                             | -167.7148087                                |
| 3.650492958                            | 79.11263391                                      | 390.3225822                          | 6258.808844                             | -294.7400238                                |
| 3.184781685                            | 59.26277977                                      | 542.8778687                          | 3512.077066                             | -128.6958038                                |
| 3.034846121                            | 67.84360538                                      | 697.9555664                          | 4602.75479                              | -161.2648071                                |
| 3.395334332                            | 83.98975845                                      | 675.6210632                          | 7054.279525                             | -200.0831604                                |
| 3.610541773                            | 84.55697477                                      | 467.5342178                          | 7149.881983                             | -227.1170593                                |
| 3.229670353                            | 64.53318842                                      | 527.6202087                          | 4164.532408                             | -154.2072906                                |
| 3.061303099                            | 60.58113718                                      | 626.3545532                          | 3670.074182                             | -134.2758636                                |
| 3.950750054                            | 96.29096839                                      | 593.4176178                          | 9271.950594                             | -236.0218719                                |
| 3.189898095                            | 117.0925739                                      | 408.675499                           | 13710.67086                             | -266.1769531                                |
| 4.20312148                             | 122.7809319                                      | 602.9607544                          | 15075.15724                             | -331.3514038                                |
| 3.769272337                            | 83.63525425                                      | 506.6457901                          | 6994.855753                             | -254.2588242                                |
| 3.003096636                            | 65.10388744                                      | 479.0018768                          | 4238.51616                              | -146.9424133                                |
| 3.593991782                            | 76.63653556                                      | 537.0308533                          | 5873.158583                             | -165.4214813                                |
| 4.192056301                            | 123.1109577                                      | 578.8141022                          | 15156.30792                             | -296.435938                                 |
| 3.884129146                            | 95.0157022                                       | 445.9800339                          | 9027.983665                             | -278.3480713                                |
| 3.773419722                            | 87.63343383                                      | 588.9998932                          | 7679.618726                             | -208.2378326                                |
| 3.859305055                            | 97.18948769                                      | 595.6248779                          | 9445.796518                             | -317.0404053                                |
| 3.69853391                             | 79.5792432                                       | 452.6716728                          | 6332.855948                             | -293.426767                                 |
| 3.987061912                            | 106.3483611                                      | 622.5484161                          | 11309.97392                             | -311.8531128                                |
| 3.997282788                            | 101.571652                                       | 600.2055206                          | 10316.8005                              | -233.0124603                                |
| 2.542688339                            | 48.02133704                                      | 320.6935577                          | 2306.048811                             | -112.1020584                                |
| 4.137224583                            | 115.9923895                                      | 1023.402069                          | 13454.23441                             | -189.5277557                                |
| 3.624568684                            | 84.43799772                                      | 366.836453                           | 7129.775459                             | -330.3845825                                |
| 3.390805482                            | 99.13028578                                      | 391.6309861                          | 9826.81356                              | -299.7457733                                |
| 4.504568545                            | 158.4525933                                      | 656.9139938                          | 25107.22433                             | -423.1235046                                |
| 3.259426497                            | 67.78397662                                      | 510.9624176                          | 4594.667486                             | -160.0293076                                |
| 3.441431846                            | 70.98536505                                      | 402.0363092                          | 5038.922051                             | -319.968927                                 |
| 3.723515691                            | 84.30971978                                      | 575.1536865                          | 7108.128849                             | -210.3627075                                |
| 3.814106311                            | 89.70573824                                      | 406.0936432                          | 8047.119473                             | -230.2931122                                |
| 2.832403347                            | 58.11851119                                      | 486.1558533                          | 3377.761343                             | -124.8542366                                |
| 4.081115432                            | 107.0617831                                      | 507.3964043                          | 11462.2254                              | -352.5712036                                |
| 4.041722662                            | 101.9498137                                      | 662.3572235                          | 10393.76451                             | -312.5241241                                |
| 4.461779337                            | 139.7121306                                      | 634.4016342                          | 19519.47943                             | -386.9002167                                |
| 3.913563049                            | 93.86586057                                      | 510.4407501                          | 8810.79978                              | -265.8610352                                |
| 3.716868639                            | 82.30123586                                      | 408.5468674                          | 6773.493423                             | -214.1209946                                |
| 3.615196504                            | 76.82235458                                      | 470.1281738                          | 5901.674163                             | -234.1356201                                |
| 3.698159494                            | 89.25977147                                      | 768.6310425                          | 7967.306803                             | -189.2415695                                |
| 3.178952037                            | 59.15358867                                      | 495.1522064                          | 3499.147052                             | -115.7337074                                |
| 3.255060828                            | 62.15045253                                      | 343.9332352                          | 3862.67875                              | -144.2953674                                |
| 3.575937201                            | 92.83746291                                      | 388.0424976                          | 8618.79452                              | -365.9725037                                |
| 3.88459595                             | 91.98584802                                      | 606.3084717                          | 8461.396235                             | -182.5803268                                |
| 4.087647041                            | 114.8943626                                      | 478.350399                           | 13200.71455                             | -412.7049866                                |
| 3.787312046                            | 94.5068124                                       | 568.9109192                          | 8931.537589                             | -222.941272                                 |
| 3.696831851                            | 87.06242148                                      | 377.3912392                          | 7579.865234                             | -384.6177551                                |
| 3.623572299                            | 76.97079533                                      | 471.4605103                          | 5924.503333                             | -194.1119904                                |
| 3.692496535                            | 80.26063536                                      | 496.5411987                          | 6441.769589                             | -201.8923492                                |
| 3.683911168                            | 80.10381603                                      | 483.2125397                          | 6416.621342                             | -294.2886963                                |
| 3.148537012                            | 65.97671955                                      | 521.025528                           | 4352.927523                             | -154.8313232                                |
| 2.974456583                            | 59.63563713                                      | 365.3318405                          | 3556.409216                             | -137.0699615                                |
| 2.957023986                            | 60.89136566                                      | 689.8039856                          | 3707.758412                             | -112.1326462                                |
| 4.042325213                            | 104.4489213                                      | 603.285141                           | 10909.57715                             | -332.413208                                 |
| 3.596281329                            | 76.23931641                                      | 464.5162201                          | 5812.433367                             | -287.9449005                                |
| 3.457443551                            | 76.07253189                                      | 406.3996658                          | 5787.030109                             | -312.1557648                                |
| 3.723055371                            | 80.75459078                                      | 499.6404037                          | 6521.303932                             | -290.1529358                                |
| 3.462244766                            | 73.70441501                                      | 612.7629242                          | 5432.340792                             | -185.4865479                                |
| 4.036271802                            | 104.3512721                                      | 477.0724335                          | 10889.18799                             | -434.5415527                                |
| 4.081586985                            | 104.0615981                                      | 662.9628906                          | 10828.8162                              | -258.2152283                                |
| 3.519546496                            | 79.39729271                                      | 692.7665405                          | 6303.930089                             | -160.380188                                 |
| 3.60663381                             | 94.88617613                                      | 355.3207273                          | 9003.38642                              | -248.6344299                                |
| 3.214349675                            | 61.77093094                                      | 445.4541321                          | 3815.647909                             | -143.4346039                                |
| 3.414015721                            | 64.72399657                                      | 506.5258331                          | 4189.195732                             | -142.2647369                                |
| 3.679615391                            | 82.77218809                                      | 476.5928726                          | 6851.235121                             | -277.149646                                 |
| 4.286331756                            | 120.4601768                                      | 713.6563873                          | 14510.6542                              | -399.0882324                                |
| 2.962292189                            | 54.00160555                                      | 228.9840431                          | 2916.173402                             | -143.1860428                                |
| 2.87314068                             | 76.40316956                                      | 255.1944962                          | 5837.444318                             | -290.3079102                                |
| 3.676116645                            | 89.55268735                                      | 647.7323151                          | 8019.683811                             | -202.4207764                                |
| 3.803451399                            | 99.70673201                                      | 434.2536697                          | 9941.432408                             | -314.8126892                                |
| 3.563404544                            | 73.50550335                                      | 388.6585083                          | 5403.059023                             | -205.9130249                                |
| 3.569634444                            | 75.63676914                                      | 460.7181854                          | 5720.920845                             | -178.8207123                                |
| 3.207980932                            | 66.25701169                                      | 467.1775818                          | 4389.991599                             | -148.9543396                                |
| 3.965086972                            | 128.1750036                                      | 654.6735687                          | 16428.83155                             | -392.7145447                                |
| 4.134760557                            | 110.0764194                                      | 600.2211609                          | 12116.8181                              | -252.2616241                                |
| 2.919372149                            | 76.77602949                                      | 247.8071289                          | 5894.558704                             | -262.7033325                                |
| 4.27632263                             | 132.5662255                                      | 630.1173553                          | 17573.80414                             | -289.6107544                                |
| 3.840894233                            | 90.5452416                                       | 523.2092133                          | 8198.440776                             | -235.6356461                                |

| log.sigma.4.0.mm.3D_firstorder_Kurtosis | log.sigma.4.0.mm.3D_firstorder_Mean | log.sigma.4.0.mm.3D_glrIm_ShortRunLowGrayLevelEmphasis | log.sigma.4.0.mm.3D_glrIm_GrayLevelVariance |
|-----------------------------------------|-------------------------------------|--------------------------------------------------------|---------------------------------------------|
| 2.231752022                             | -150.9743733                        | 0.015397228                                            | 16.36800302                                 |
| 2.619970391                             | -93.36381952                        | 0.015192241                                            | 9.412635719                                 |
| 2.784682165                             | -158.2394257                        | 0.051649389                                            | 11.35264831                                 |
| 3.407002367                             | -93.04854356                        | 0.007909134                                            | 18.04646927                                 |
| 2.658792357                             | -184.8367216                        | 0.027751614                                            | 36.58338021                                 |
| 2.563369659                             | -218.5951457                        | 0.037483053                                            | 7.681256948                                 |
| 2.738682943                             | -102.2092373                        | 0.092512718                                            | 5.467354403                                 |
| 3.371847939                             | -217.7593976                        | 0.02872195                                             | 18.75333716                                 |
| 2.40230608                              | -45.84320809                        | 0.007893007                                            | 70.03586389                                 |
| 3.420857627                             | -84.3107612                         | 0.00872999                                             | 9.306670538                                 |
| 3.063668839                             | -210.1368731                        | 0.026335232                                            | 9.628530078                                 |
| 3.026995216                             | -107.1442815                        | 0.020349738                                            | 13.13099734                                 |
| 4.33219863                              | -103.7370703                        | 0.034422657                                            | 10.42476785                                 |
| 2.997733785                             | -134.5918002                        | 0.03696447                                             | 15.0650235                                  |
| 2.99062597                              | -97.41197718                        | 0.030624424                                            | 14.91278848                                 |
| 8.489647016                             | -16.78502258                        | 0.007122248                                            | 6.609234992                                 |
| 2.454987335                             | -210.2919189                        | 0.046810037                                            | 18.18420162                                 |
| 3.588465998                             | -127.8804998                        | 0.026811277                                            | 10.18072665                                 |
| 2.263787094                             | -185.3020039                        | 0.053228931                                            | 29.80533914                                 |
| 2.24924587                              | -56.11755489                        | 0.017267321                                            | 7.907573581                                 |
| 3.206580865                             | -64.76591357                        | 0.013866896                                            | 5.705188281                                 |
| 3.691100493                             | -99.56502242                        | 0.029116295                                            | 14.42800879                                 |
| 3.997220903                             | -71.91013559                        | 0.010654471                                            | 7.281313042                                 |
| 2.209323145                             | -59.37751838                        | 0.019414278                                            | 35.55888154                                 |
| 3.050078149                             | -86.61376372                        | 0.029827569                                            | 6.318082504                                 |
| 2.389426836                             | -184.64891                          | 0.038270311                                            | 10.358189                                   |
| 4.550996216                             | -51.93372854                        | 0.016858584                                            | 6.527797434                                 |
| 3.489484654                             | -60.2397891                         | 0.009177929                                            | 8.070879663                                 |
| 3.16258562                              | -78.92646005                        | 0.008749982                                            | 11.91065535                                 |
| 2.470904835                             | -105.484796                         | 0.015111157                                            | 11.25574677                                 |
| 3.273803631                             | -65.02147019                        | 0.011398489                                            | 7.137955611                                 |
| 4.615840793                             | -45.51706308                        | 0.009113533                                            | 7.314376696                                 |
| 2.683603943                             | -112.2244449                        | 0.024082942                                            | 15.1304543                                  |
| 2.040976263                             | -133.7418298                        | 0.106294089                                            | 22.13739515                                 |
| 2.585244952                             | -172.6149413                        | 0.02233229                                             | 24.35207354                                 |
| 2.675389139                             | -153.9603864                        | 0.014407204                                            | 11.46858977                                 |
| 3.747591814                             | -45.00051942                        | 0.010108321                                            | 7.927203375                                 |
| 2.616037007                             | -58.35658573                        | 0.019882525                                            | 10.07133976                                 |
| 2.370434615                             | -120.8472605                        | 0.035741346                                            | 24.02268872                                 |
| 2.085657373                             | -157.2886329                        | 0.025738634                                            | 14.49058601                                 |
| 3.143212573                             | -90.00477746                        | 0.010075935                                            | 12.50311383                                 |
| 3.774662105                             | -211.9586245                        | 0.01795209                                             | 15.67453528                                 |
| 2.886338206                             | -190.5498048                        | 0.022567338                                            | 10.53874146                                 |
| 3.369628078                             | -188.8048175                        | 0.035953684                                            | 18.55697547                                 |
| 3.612641277                             | -113.5413996                        | 0.01932965                                             | 17.10262516                                 |
| 4.051581283                             | -30.47838767                        | 0.014237047                                            | 4.567691786                                 |
| 6.891940593                             | -61.08676566                        | 0.010932353                                            | 22.37811235                                 |
| 2.583652595                             | -227.4230877                        | 0.069186331                                            | 11.63842368                                 |
| 2.547398619                             | -204.0845408                        | 0.10208469                                             | 15.06993416                                 |
| 2.149702428                             | -197.5015659                        | 0.023798481                                            | 40.30408792                                 |
| 3.150739817                             | -61.4208214                         | 0.011845654                                            | 8.164567682                                 |
| 3.210068989                             | -242.624712                         | 0.039698377                                            | 8.395268821                                 |
| 2.624884305                             | -93.66291336                        | 0.011701838                                            | 11.55428217                                 |
| 2.254147219                             | -112.0101556                        | 0.047121805                                            | 12.53233349                                 |
| 4.54841017                              | -29.41946821                        | 0.009742937                                            | 7.273728401                                 |
| 2.382558256                             | -213.8734697                        | 0.029469098                                            | 18.84380906                                 |
| 3.150174554                             | -191.8951624                        | 0.01215065                                             | 17.15539492                                 |
| 2.452404896                             | -188.224852                         | 0.020783694                                            | 31.24595646                                 |
| 2.863643568                             | -149.6106498                        | 0.024824875                                            | 14.53857609                                 |
| 2.434805964                             | -110.1365769                        | 0.030557374                                            | 11.06563201                                 |
| 2.757480037                             | -142.2898037                        | 0.020312635                                            | 9.272808067                                 |
| 3.943717729                             | -63.7176219                         | 0.007357235                                            | 14.54816592                                 |
| 3.230787067                             | -25.95080167                        | 0.014648291                                            | 6.54789944                                  |
| 2.343557942                             | -58.13756615                        | 0.016143457                                            | 6.233675349                                 |
| 2.338083474                             | -223.0749933                        | 0.063471039                                            | 13.81588828                                 |
| 2.968207717                             | -59.30109479                        | 0.016712229                                            | 13.72002255                                 |
| 2.377166366                             | -239.4478359                        | 0.038446481                                            | 21.21684974                                 |
| 2.422163076                             | -85.13726309                        | 0.024778508                                            | 14.51460224                                 |
| 2.76514665                              | -282.1918355                        | 0.044421432                                            | 12.28239728                                 |
| 2.4703155                               | -88.76905155                        | 0.016394329                                            | 9.645089884                                 |
| 2.642308286                             | -94.42065737                        | 0.010564426                                            | 10.49388572                                 |
| 3.331500714                             | -196.9489093                        | 0.024540375                                            | 10.80290638                                 |
| 2.936157418                             | -51.27227371                        | 0.009879806                                            | 7.55414444                                  |
| 3.203254798                             | -41.46269901                        | 0.023914205                                            | 6.701337401                                 |
| 5.946593084                             | -21.48541176                        | 0.00713746                                             | 8.405169596                                 |
| 2.858679914                             | -213.3107093                        | 0.020679225                                            | 18.09606484                                 |
| 3.055274134                             | -198.6986687                        | 0.022294791                                            | 9.656414031                                 |
| 4.3691777271                            | -230.8596177                        | 0.109323494                                            | 9.586875627                                 |
| 3.087513186                             | -183.6307579                        | 0.014754501                                            | 10.87224816                                 |
| 3.158733538                             | -84.73831248                        | 0.007554688                                            | 8.99959343                                  |
| 2.570491739                             | -308.3112093                        | 0.031032256                                            | 17.83706524                                 |
| 3.136214139                             | -129.1881168                        | 0.009407794                                            | 18.03170988                                 |
| 3.883955091                             | -45.24958407                        | 0.004953336                                            | 11.52815979                                 |
| 2.193691862                             | -132.5059243                        | 0.056182786                                            | 14.44988003                                 |
| 3.133041274                             | -53.55013048                        | 0.018119568                                            | 6.729540189                                 |
| 3.442013222                             | -60.99186409                        | 0.015600803                                            | 7.354694972                                 |
| 3.549249476                             | -184.7090672                        | 0.027063855                                            | 11.36509977                                 |
| 2.971285063                             | -250.7935019                        | 0.01336496                                             | 23.52610774                                 |
| 2.420070881                             | -76.2840711                         | 0.082399458                                            | 4.874395453                                 |
| 1.887432783                             | -202.8113978                        | 0.114533919                                            | 9.760672894                                 |
| 3.223051291                             | -77.35291883                        | 0.009562711                                            | 13.47243392                                 |
| 3.296782911                             | -203.4355706                        | 0.046680799                                            | 16.10772963                                 |
| 2.611233804                             | -108.4318227                        | 0.026594885                                            | 9.012643791                                 |
| 2.556619896                             | -74.5340751                         | 0.015121031                                            | 9.203683484                                 |
| 2.920862092                             | -47.62331547                        | 0.012179562                                            | 8.272170256                                 |
| 2.705840275                             | -237.4914537                        | 0.025506357                                            | 27.11432298                                 |
| 2.74545861                              | -110.2824002                        | 0.019913112                                            | 19.6540826                                  |
| 2.059460224                             | -170.4721762                        | 0.14232867                                             | 9.713369662                                 |
| 2.486424964                             | -119.0561502                        | 0.015765935                                            | 27.8416985                                  |
| 2.987756252                             | -105.6830687                        | 0.01765142                                             | 13.70485462                                 |

| log.sigma.4.0.mm.3D_glrIm_LowGrayLevelRunEmphasis | log.sigma.4.0.mm.3D_glrIm_GrayLevelNonUniformityNormalized | log.sigma.4.0.mm.3D_glrIm_RunVariance | log.sigma.4.0.mm.3D_glrIm_GrayLevelNonUniformity |
|---------------------------------------------------|------------------------------------------------------------|---------------------------------------|--------------------------------------------------|
| 0.016426617                                       | 0.069555523                                                | 0.123976713                           | 22.6006454                                       |
| 0.016779675                                       | 0.092365454                                                | 0.488539646                           | 103.2448737                                      |
| 0.055813647                                       | 0.092602036                                                | 0.095936711                           | 15.13134416                                      |
| 0.008589686                                       | 0.069165281                                                | 0.247470631                           | 115.8946416                                      |
| 0.028402743                                       | 0.051300415                                                | 0.034184581                           | 5.004043104                                      |
| 0.041692195                                       | 0.102920957                                                | 0.147988291                           | 22.38170221                                      |
| 0.098666987                                       | 0.130915081                                                | 0.062033641                           | 8.589625925                                      |
| 0.030428721                                       | 0.068699471                                                | 0.094692146                           | 25.38870827                                      |
| 0.008292576                                       | 0.038076653                                                | 0.084336663                           | 52.31217715                                      |
| 0.009853193                                       | 0.095259884                                                | 0.407655393                           | 177.7066591                                      |
| 0.028351035                                       | 0.095259176                                                | 0.133807575                           | 32.28985674                                      |
| 0.022066313                                       | 0.077780172                                                | 0.170539098                           | 51.88819613                                      |
| 0.038275054                                       | 0.098076313                                                | 0.225770019                           | 114.2791406                                      |
| 0.037667692                                       | 0.076407472                                                | 0.149611556                           | 35.98281316                                      |
| 0.033470897                                       | 0.075518938                                                | 0.080968029                           | 25.57813412                                      |
| 0.009327302                                       | 0.155342732                                                | 3.503474593                           | 858.8224824                                      |
| 0.049174872                                       | 0.069125763                                                | 0.053209406                           | 14.30534946                                      |
| 0.029858716                                       | 0.090589552                                                | 0.237486062                           | 120.0246975                                      |
| 0.060589583                                       | 0.052308799                                                | 0.056530861                           | 9.040036594                                      |
| 0.020106646                                       | 0.099678661                                                | 0.819260596                           | 203.3418915                                      |
| 0.016338446                                       | 0.122703166                                                | 1.287545453                           | 421.1056689                                      |
| 0.031732745                                       | 0.080883454                                                | 0.194120869                           | 64.9586682                                       |
| 0.012279331                                       | 0.114627161                                                | 0.799533617                           | 244.2891004                                      |
| 0.019933056                                       | 0.051797724                                                | 0.049169252                           | 6.574950555                                      |
| 0.033576116                                       | 0.115273586                                                | 0.337037544                           | 89.67852371                                      |
| 0.041106164                                       | 0.087928604                                                | 0.112678416                           | 24.05037296                                      |
| 0.019554948                                       | 0.122866828                                                | 0.761767636                           | 207.0914135                                      |
| 0.010900342                                       | 0.111346509                                                | 1.81287237                            | 274.3641359                                      |
| 0.009915468                                       | 0.091520173                                                | 1.327845514                           | 237.8384519                                      |
| 0.016605214                                       | 0.084820162                                                | 0.66471826                            | 110.4702937                                      |
| 0.013328077                                       | 0.111165395                                                | 1.240389375                           | 321.1070305                                      |
| 0.011090635                                       | 0.119358483                                                | 1.976907108                           | 659.43346                                        |
| 0.02609012                                        | 0.071847613                                                | 0.226172051                           | 86.80645255                                      |
| 0.107226777                                       | 0.118601061                                                | 0.030421818                           | 1.725612849                                      |
| 0.022703139                                       | 0.061110588                                                | 0.041461683                           | 6.628296209                                      |
| 0.015675373                                       | 0.082886972                                                | 0.166596909                           | 97.55327804                                      |
| 0.012064029                                       | 0.120377091                                                | 1.86503704                            | 498.2970552                                      |
| 0.023004489                                       | 0.088025452                                                | 0.627486569                           | 203.5444459                                      |
| 0.038604067                                       | 0.061624569                                                | 0.092111893                           | 18.4004841                                       |
| 0.027563227                                       | 0.073314183                                                | 0.133447393                           | 35.48165832                                      |
| 0.010852084                                       | 0.083379352                                                | 0.217931916                           | 51.41240592                                      |
| 0.019203399                                       | 0.080571935                                                | 0.124353954                           | 27.85329657                                      |
| 0.024462987                                       | 0.087076234                                                | 0.150093951                           | 64.54013584                                      |
| 0.038684432                                       | 0.07108155                                                 | 0.113649553                           | 28.42529357                                      |
| 0.020945525                                       | 0.073295421                                                | 0.135673833                           | 73.50695669                                      |
| 0.018393445                                       | 0.164595967                                                | 2.576875039                           | 546.7866349                                      |
| 0.011861163                                       | 0.067493811                                                | 0.133408105                           | 167.1828248                                      |
| 0.077054423                                       | 0.08932533                                                 | 0.123820798                           | 18.3564242                                       |
| 0.106416604                                       | 0.105302445                                                | 0.036793493                           | 2.230822119                                      |
| 0.024707378                                       | 0.04821082                                                 | 0.032074895                           | 6.812836331                                      |
| 0.01373019                                        | 0.102773496                                                | 1.416844955                           | 283.3055239                                      |
| 0.043915208                                       | 0.104615982                                                | 0.141259185                           | 37.58978834                                      |
| 0.012852599                                       | 0.083145423                                                | 0.374460172                           | 219.7962911                                      |
| 0.055875832                                       | 0.078562128                                                | 0.124348132                           | 16.90133013                                      |
| 0.012151246                                       | 0.131140887                                                | 2.8559235                             | 841.5103419                                      |
| 0.031351918                                       | 0.064468267                                                | 0.086175193                           | 20.12359579                                      |
| 0.01276589                                        | 0.070051047                                                | 0.084475473                           | 57.05543423                                      |
| 0.022188427                                       | 0.05120086                                                 | 0.059609427                           | 22.31987168                                      |
| 0.026551385                                       | 0.075538623                                                | 0.107226302                           | 24.27994196                                      |
| 0.034155688                                       | 0.083549809                                                | 0.214932819                           | 33.6826461                                       |
| 0.022350228                                       | 0.094673262                                                | 0.225831374                           | 118.0502004                                      |
| 0.008381228                                       | 0.082152129                                                | 1.001595                              | 407.5917473                                      |
| 0.017500094                                       | 0.115081783                                                | 1.059126656                           | 327.3836106                                      |
| 0.018405258                                       | 0.111539819                                                | 0.645835781                           | 152.0257488                                      |
| 0.06566661                                        | 0.101720537                                                | 0.044781883                           | 5.14851042                                       |
| 0.018099697                                       | 0.077804227                                                | 0.188316548                           | 78.99767706                                      |
| 0.040566289                                       | 0.06670518                                                 | 0.047315608                           | 6.670991587                                      |
| 0.027706038                                       | 0.076291262                                                | 0.698731015                           | 204.7589071                                      |
| 0.048862712                                       | 0.084330654                                                | 0.102441699                           | 11.07483548                                      |
| 0.018142936                                       | 0.088870938                                                | 0.349560251                           | 131.4620823                                      |
| 0.011787628                                       | 0.086473829                                                | 0.344934106                           | 185.6638639                                      |
| 0.026782156                                       | 0.089159644                                                | 0.151971976                           | 44.88940176                                      |
| 0.011860802                                       | 0.109900721                                                | 1.683143975                           | 498.3207594                                      |
| 0.028469591                                       | 0.117177141                                                | 2.252074598                           | 751.9314652                                      |
| 0.008935576                                       | 0.126828919                                                | 2.622948673                           | 1066.972679                                      |
| 0.021909851                                       | 0.06825459                                                 | 0.120351168                           | 27.82231388                                      |
| 0.024144386                                       | 0.093505222                                                | 0.160004204                           | 38.14994257                                      |
| 0.120126653                                       | 0.103493996                                                | 0.131642888                           | 20.95361717                                      |
| 0.015815481                                       | 0.087054498                                                | 0.167876725                           | 70.39489759                                      |
| 0.008545119                                       | 0.0970629                                                  | 0.863175553                           | 195.6746618                                      |
| 0.032320218                                       | 0.068392271                                                | 0.056688729                           | 9.700775365                                      |
| 0.009984148                                       | 0.068439439                                                | 0.124059562                           | 53.52963223                                      |
| 0.005682152                                       | 0.093585718                                                | 0.979881069                           | 336.225916                                       |
| 0.056541706                                       | 0.090384986                                                | 0.02467296                            | 2.73247483                                       |
| 0.0210546                                         | 0.113442572                                                | 1.114718222                           | 393.6697511                                      |
| 0.017784956                                       | 0.106706015                                                | 0.373154578                           | 306.0253325                                      |
| 0.029190675                                       | 0.089534103                                                | 0.120804084                           | 29.64304288                                      |
| 0.014014964                                       | 0.058915541                                                | 0.070925612                           | 32.64004872                                      |
| 0.086330964                                       | 0.138251925                                                | 0.074182829                           | 6.438327947                                      |
| 0.117612754                                       | 0.144212431                                                | 0.074380165                           | 1.734265734                                      |
| 0.010635504                                       | 0.083612237                                                | 0.783375901                           | 217.5875671                                      |
| 0.050950375                                       | 0.082932355                                                | 0.124709919                           | 22.81135677                                      |
| 0.02909061                                        | 0.093847526                                                | 0.174343136                           | 34.21421366                                      |
| 0.017036033                                       | 0.091708834                                                | 0.711427323                           | 252.1845098                                      |
| 0.014507496                                       | 0.10167489                                                 | 1.7713257                             | 468.9808673                                      |
| 0.025804961                                       | 0.072666723                                                | 0.039155069                           | 4.411139938                                      |
| 0.021789961                                       | 0.064488913                                                | 0.111834724                           | 40.11288607                                      |
| 0.15063443                                        | 0.147439533                                                | 0.054042685                           | 3.34696463                                       |
| 0.016129285                                       | 0.059293926                                                | 0.04389499                            | 9.268257174                                      |
| 0.018484275                                       | 0.080842929                                                | 0.116552847                           | 20.55030378                                      |

| log.sigma.4.0.mm.3D_glrIm_LongRunEmphasis | log.sigma.4.0.mm.3D_glrIm_ShortRunHighGrayLevelEmphasis | log.sigma.4.0.mm.3D_glrIm_RunLengthNonUniformity | log.sigma.4.0.mm.3D_glrIm_ShortRunEmphasis |
|-------------------------------------------|---------------------------------------------------------|--------------------------------------------------|--------------------------------------------|
| 1.362675177                               | 138.8692437                                             | 266.6703224                                      | 0.923097982                                |
| 2.081118673                               | 99.9236312                                              | 790.4842162                                      | 0.863341887                                |
| 1.275476253                               | 61.73286575                                             | 140.6666919                                      | 0.941253016                                |
| 1.585560658                               | 188.8676732                                             | 1326.366112                                      | 0.908739535                                |
| 1.107705144                               | 182.2994813                                             | 90.94445408                                      | 0.973073714                                |
| 1.411874622                               | 52.92240195                                             | 176.6032182                                      | 0.918875038                                |
| 1.205034263                               | 32.7690966                                              | 57.6451887                                       | 0.948741434                                |
| 1.274025891                               | 112.5907088                                             | 316.6931165                                      | 0.940690513                                |
| 1.24030832                                | 358.1343081                                             | 1200.054996                                      | 0.948003887                                |
| 1.963303671                               | 132.9812258                                             | 1313.658847                                      | 0.863025063                                |
| 1.370369208                               | 72.81208452                                             | 280.3403699                                      | 0.926014118                                |
| 1.464475451                               | 108.6787465                                             | 532.2912522                                      | 0.911750905                                |
| 1.60711383                                | 60.21044742                                             | 879.4209678                                      | 0.890648591                                |
| 1.40895812                                | 80.73244989                                             | 383.1614711                                      | 0.92036343                                 |
| 1.239230449                               | 88.26958543                                             | 295.310692                                       | 0.946661491                                |
| 7.530473185                               | 105.3060071                                             | 2359.066866                                      | 0.674150479                                |
| 1.154943908                               | 99.87085667                                             | 188.9769657                                      | 0.964939334                                |
| 1.616998885                               | 73.51324189                                             | 1005.682788                                      | 0.892504747                                |
| 1.168819302                               | 131.9975191                                             | 156.592724                                       | 0.96120688                                 |
| 2.709440271                               | 69.13250199                                             | 1305.840032                                      | 0.823478493                                |
| 3.512142041                               | 71.53284447                                             | 2010.429875                                      | 0.790807386                                |
| 1.488458178                               | 83.47746241                                             | 649.8584563                                      | 0.916199881                                |
| 2.721008588                               | 105.8056829                                             | 1337.498456                                      | 0.815882021                                |
| 1.149129837                               | 254.5342427                                             | 115.91164                                        | 0.96475797                                 |
| 1.876246323                               | 59.17030687                                             | 542.5708488                                      | 0.85806956                                 |
| 1.336438949                               | 71.69656575                                             | 226.4699973                                      | 0.926668212                                |
| 2.640870025                               | 75.46232792                                             | 1062.455967                                      | 0.819559724                                |
| 4.390745931                               | 98.42707259                                             | 1364.866667                                      | 0.769347694                                |
| 3.424935145                               | 132.4784495                                             | 1648.720775                                      | 0.820351279                                |
| 2.368718315                               | 104.4573713                                             | 899.6514421                                      | 0.854049672                                |
| 3.396532895                               | 89.1034678                                              | 1739.975512                                      | 0.801257745                                |
| 4.598463414                               | 99.30300797                                             | 3025.199642                                      | 0.765840468                                |
| 1.55134331                                | 103.7144394                                             | 958.0000136                                      | 0.90975062                                 |
| 1.101437025                               | 84.65786137                                             | 13.70667794                                      | 0.974640744                                |
| 1.128252095                               | 179.5322823                                             | 99.99878985                                      | 0.968728366                                |
| 1.454897477                               | 109.5079488                                             | 937.6007108                                      | 0.912108811                                |
| 4.572326111                               | 89.28171282                                             | 2195.204365                                      | 0.753567875                                |
| 2.36422235                                | 75.7244785                                              | 1549.93968                                       | 0.84297714                                 |
| 1.25731263                                | 134.7552304                                             | 262.0407617                                      | 0.947806609                                |
| 1.368035591                               | 92.81156811                                             | 399.8525651                                      | 0.926117168                                |
| 1.576573809                               | 157.3427425                                             | 476.3521239                                      | 0.898215408                                |
| 1.341485734                               | 113.8191181                                             | 288.8838053                                      | 0.931064465                                |
| 1.39280735                                | 85.79586733                                             | 614.1727792                                      | 0.92658915                                 |
| 1.321541254                               | 97.86226689                                             | 336.0294861                                      | 0.932962512                                |
| 1.374267574                               | 110.834383                                              | 824.4817508                                      | 0.924644443                                |
| 6.182982356                               | 48.67060767                                             | 1443.620608                                      | 0.677164111                                |
| 1.364613483                               | 161.2068192                                             | 2052.069113                                      | 0.927461238                                |
| 1.359305244                               | 52.9911262                                              | 169.3906019                                      | 0.924544391                                |
| 1.136005171                               | 84.947776                                               | 19.76397328                                      | 0.965998707                                |
| 1.100443613                               | 252.4011077                                             | 132.3149732                                      | 0.974889097                                |
| 3.646842225                               | 90.77906683                                             | 1659.805948                                      | 0.801299424                                |
| 1.406008549                               | 53.63254743                                             | 290.5358153                                      | 0.917102343                                |
| 1.849164127                               | 125.1871237                                             | 1955.591098                                      | 0.881643109                                |
| 1.363915297                               | 73.29380021                                             | 177.0280361                                      | 0.923294222                                |
| 6.07568492                                | 84.82072813                                             | 3144.227805                                      | 0.72608514                                 |
| 1.24048957                                | 115.0878751                                             | 274.1551585                                      | 0.949500825                                |
| 1.2333988                                 | 153.7784534                                             | 717.6416852                                      | 0.951085536                                |
| 1.166051898                               | 222.1160374                                             | 398.369473                                       | 0.964690952                                |
| 1.323199955                               | 100.3308524                                             | 267.080017                                       | 0.928283238                                |
| 1.57185479                                | 71.73317347                                             | 312.1946954                                      | 0.898322551                                |
| 1.591539302                               | 76.6315982                                              | 953.3172817                                      | 0.895723999                                |
| 2.905933515                               | 159.977613                                              | 3241.745681                                      | 0.833161236                                |
| 3.217722578                               | 71.89101878                                             | 1702.08141                                       | 0.793916763                                |
| 2.379156733                               | 70.3207406                                              | 917.0999689                                      | 0.843500188                                |
| 1.143531987                               | 85.40912837                                             | 46.14838661                                      | 0.964117003                                |
| 1.487745402                               | 125.1427034                                             | 815.6564665                                      | 0.913023256                                |
| 1.152697605                               | 139.2552294                                             | 90.68883236                                      | 0.961825599                                |
| 2.385959762                               | 89.13587829                                             | 1876.548144                                      | 0.859297255                                |
| 1.291869079                               | 65.44881593                                             | 112.0671517                                      | 0.938419158                                |
| 1.829770459                               | 90.42259073                                             | 1082.246967                                      | 0.877272564                                |
| 1.825422945                               | 124.7176584                                             | 1577.321602                                      | 0.878290801                                |
| 1.425308959                               | 80.04089476                                             | 405.3010603                                      | 0.915510664                                |
| 4.179068529                               | 89.28132343                                             | 2500.116377                                      | 0.769010058                                |
| 5.169048546                               | 50.08126611                                             | 3280.221957                                      | 0.741002948                                |
| 5.682365617                               | 113.3827292                                             | 4252.610777                                      | 0.737721999                                |
| 1.321641258                               | 135.5232436                                             | 347.1712712                                      | 0.937479031                                |
| 1.417469243                               | 79.7362247                                              | 335.0882597                                      | 0.922820981                                |
| 1.360508038                               | 37.84860947                                             | 168.5136875                                      | 0.928573318                                |
| 1.453656496                               | 123.644289                                              | 650.8135086                                      | 0.914122005                                |
| 2.683729847                               | 139.380349                                              | 1356.925397                                      | 0.843721406                                |
| 1.164509486                               | 120.5816391                                             | 129.5839459                                      | 0.963915525                                |
| 1.35058147                                | 183.5829951                                             | 648.2830755                                      | 0.927636464                                |
| 2.908005074                               | 199.1974388                                             | 2336.107348                                      | 0.830619128                                |
| 1.079632437                               | 95.99686495                                             | 28.79958318                                      | 0.980091891                                |
| 3.199639972                               | 68.07657028                                             | 2122.243911                                      | 0.807019187                                |
| 1.881403081                               | 80.02168504                                             | 2064.853187                                      | 0.871301281                                |
| 1.340072537                               | 75.69347519                                             | 276.6309316                                      | 0.930446648                                |
| 1.202553115                               | 201.5961188                                             | 493.3467328                                      | 0.955487783                                |
| 1.242270473                               | 34.17468369                                             | 40.77556813                                      | 0.943200685                                |
| 1.272727273                               | 48.72596154                                             | 10.36363636                                      | 0.931818182                                |
| 2.542936916                               | 147.9406972                                             | 1791.692737                                      | 0.852476988                                |
| 1.35065561                                | 68.62482046                                             | 229.0026076                                      | 0.928524268                                |
| 1.483558272                               | 68.99401394                                             | 287.2139174                                      | 0.906795427                                |
| 2.505275184                               | 90.01854806                                             | 1814.985109                                      | 0.835762521                                |
| 4.281342335                               | 80.94578019                                             | 2594.095056                                      | 0.776190283                                |
| 1.120623911                               | 191.2192548                                             | 56.50536511                                      | 0.971398024                                |
| 1.309330948                               | 138.4549795                                             | 527.5831066                                      | 0.936505103                                |
| 1.177083786                               | 40.63444346                                             | 20.29487903                                      | 0.955729054                                |
| 1.133589461                               | 210.5046889                                             | 143.9918346                                      | 0.968016662                                |
| 1.335262441                               | 130.2105895                                             | 212.3341081                                      | 0.92978777                                 |

| log.sigma.4.0.mm.3D_glrIm_LongRunHighGrayLevelEmphasis | log.sigma.4.0.mm.3D_glrIm_RunPercentage | log.sigma.4.0.mm.3D_glrIm_LongRunLowGrayLevelEmphasis | log.sigma.4.0.mm.3D_glrIm_RunEntropy |
|--------------------------------------------------------|-----------------------------------------|-------------------------------------------------------|--------------------------------------|
| 198.8409081                                            | 0.900063925                             | 0.021182626                                           | 4.429006682                          |
| 289.3593103                                            | 0.796425243                             | 0.026657634                                           | 4.392981967                          |
| 77.22930451                                            | 0.923076923                             | 0.074759152                                           | 3.987626439                          |
| 330.9045283                                            | 0.866608301                             | 0.012456233                                           | 4.678032256                          |
| 199.2857931                                            | 0.965727342                             | 0.031007262                                           | 4.543253744                          |
| 68.29901444                                            | 0.891235813                             | 0.063080413                                           | 3.8921778034                         |
| 40.45155914                                            | 0.937362637                             | 0.123284062                                           | 3.328373996                          |
| 138.7083268                                            | 0.921542298                             | 0.038007265                                           | 4.4413838                            |
| 483.1909736                                            | 0.930790077                             | 0.010166961                                           | 5.247958774                          |
| 313.8760351                                            | 0.804358643                             | 0.01697736                                            | 4.456864815                          |
| 96.00743762                                            | 0.901186579                             | 0.038534814                                           | 4.049109809                          |
| 169.7933774                                            | 0.881312875                             | 0.030192463                                           | 4.403345035                          |
| 97.470164                                              | 0.852911364                             | 0.058539694                                           | 4.278723365                          |
| 103.7695526                                            | 0.891899767                             | 0.057421028                                           | 4.370901612                          |
| 104.8849669                                            | 0.930473373                             | 0.046619561                                           | 4.234377829                          |
| 1320.476825                                            | 0.508176807                             | 0.047983104                                           | 4.843809575                          |
| 113.1292316                                            | 0.953562566                             | 0.059527311                                           | 4.223094035                          |
| 126.4142461                                            | 0.853637986                             | 0.046118731                                           | 4.341456549                          |
| 148.1411273                                            | 0.949704142                             | 0.090174096                                           | 4.537306157                          |
| 282.7993536                                            | 0.735011924                             | 0.042313055                                           | 4.464346072                          |
| 412.2869447                                            | 0.675846912                             | 0.03961814                                            | 4.395377601                          |
| 120.5997892                                            | 0.883219091                             | 0.046690856                                           | 4.390679519                          |
| 425.0792251                                            | 0.729109589                             | 0.024725283                                           | 4.41617423                           |
| 304.4622236                                            | 0.954308849                             | 0.022067667                                           | 4.574949834                          |
| 136.3058157                                            | 0.810336538                             | 0.053539708                                           | 4.134507572                          |
| 99.88975946                                            | 0.905756495                             | 0.053478483                                           | 4.091256553                          |
| 261.2612891                                            | 0.734885909                             | 0.039646101                                           | 4.353615194                          |
| 760.875262                                             | 0.630729732                             | 0.031437071                                           | 4.567894108                          |
| 749.0794637                                            | 0.697710524                             | 0.021736214                                           | 4.674077841                          |
| 381.3473009                                            | 0.769185333                             | 0.027019493                                           | 4.533588323                          |
| 481.4202672                                            | 0.687034223                             | 0.031683628                                           | 4.4978641                            |
| 711.5937275                                            | 0.624119343                             | 0.035794769                                           | 4.675888739                          |
| 185.0155294                                            | 0.869967326                             | 0.03642623                                            | 4.535992496                          |
| 93.76500423                                            | 0.969230769                             | 0.110957527                                           | 3.233346984                          |
| 203.0571533                                            | 0.959836624                             | 0.024196306                                           | 4.364425672                          |
| 170.7534424                                            | 0.882308846                             | 0.022018751                                           | 4.332435043                          |
| 744.7710666                                            | 0.616407804                             | 0.035164023                                           | 4.623873178                          |
| 236.2911953                                            | 0.7624315                               | 0.043905614                                           | 4.594633625                          |
| 167.1050236                                            | 0.930265996                             | 0.052303112                                           | 4.497653625                          |
| 134.3863418                                            | 0.901303538                             | 0.036418637                                           | 4.348522952                          |
| 287.8488148                                            | 0.8619688                               | 0.014934907                                           | 4.403156263                          |
| 145.3460779                                            | 0.907126994                             | 0.02526665                                            | 4.311370527                          |
| 119.2206686                                            | 0.899365198                             | 0.033789968                                           | 4.188995045                          |
| 120.4798377                                            | 0.910811284                             | 0.052092741                                           | 4.420433001                          |
| 153.2081546                                            | 0.899344602                             | 0.028592902                                           | 4.501106093                          |
| 623.2670115                                            | 0.540069862                             | 0.073521157                                           | 4.483081154                          |
| 218.2686245                                            | 0.902011317                             | 0.016397237                                           | 4.647079935                          |
| 64.70036132                                            | 0.901147099                             | 0.115018281                                           | 4.072783139                          |
| 91.58622946                                            | 0.961538462                             | 0.123744261                                           | 3.452639845                          |
| 276.5079455                                            | 0.967860906                             | 0.028342964                                           | 4.619770814                          |
| 533.5920574                                            | 0.674717195                             | 0.03321786                                            | 4.591670966                          |
| 70.35375495                                            | 0.891200611                             | 0.064364375                                           | 3.959341845                          |
| 296.2166246                                            | 0.827133743                             | 0.019824969                                           | 4.493476288                          |
| 103.3251597                                            | 0.900547152                             | 0.092730072                                           | 4.219217706                          |
| 871.3974231                                            | 0.564853243                             | 0.049511842                                           | 4.742373025                          |
| 140.8010815                                            | 0.931802526                             | 0.039505675                                           | 4.400982425                          |
| 186.3744727                                            | 0.933927311                             | 0.015664364                                           | 4.392773545                          |
| 259.1168487                                            | 0.951965066                             | 0.028434027                                           | 4.67738827                           |
| 135.1378465                                            | 0.908083442                             | 0.033982214                                           | 4.346051641                          |
| 116.7068066                                            | 0.865467151                             | 0.053603665                                           | 4.306467917                          |
| 143.3990971                                            | 0.857256146                             | 0.033170986                                           | 4.239012663                          |
| 663.0580218                                            | 0.730621651                             | 0.017643882                                           | 4.854865165                          |
| 321.0829609                                            | 0.695819644                             | 0.043602571                                           | 4.479940392                          |
| 233.2062485                                            | 0.764568765                             | 0.035669726                                           | 4.211354093                          |
| 99.47461882                                            | 0.955007257                             | 0.074448896                                           | 3.742884955                          |
| 207.5755348                                            | 0.881343483                             | 0.024967581                                           | 4.430137631                          |
| 157.8366807                                            | 0.952380952                             | 0.04904552                                            | 4.243799424                          |
| 325.1290115                                            | 0.773512902                             | 0.046331433                                           | 4.712556416                          |
| 74.94603568                                            | 0.918235611                             | 0.070232814                                           | 4.028351261                          |
| 212.8372436                                            | 0.825420673                             | 0.028190597                                           | 4.383688991                          |
| 284.8867581                                            | 0.826027762                             | 0.018895736                                           | 4.456064119                          |
| 116.7556183                                            | 0.887939221                             | 0.037856705                                           | 4.217143146                          |
| 663.9910658                                            | 0.641098309                             | 0.033510969                                           | 4.604306187                          |
| 494.7767956                                            | 0.591244089                             | 0.081112227                                           | 4.661442023                          |
| 1012.296571                                            | 0.57747143                              | 0.036180857                                           | 4.848621222                          |
| 173.0929618                                            | 0.913763367                             | 0.027728525                                           | 4.452330215                          |
| 110.337644                                             | 0.894568151                             | 0.033980731                                           | 4.094386587                          |
| 45.38835366                                            | 0.903846154                             | 0.179936156                                           | 3.905345729                          |
| 195.2207699                                            | 0.885752801                             | 0.021066976                                           | 4.279318997                          |
| 543.6381437                                            | 0.745277651                             | 0.017182532                                           | 4.480405468                          |
| 136.4275654                                            | 0.95198761                              | 0.037827757                                           | 4.237775373                          |
| 259.1548433                                            | 0.904046243                             | 0.01269784                                            | 4.567250688                          |
| 802.0407896                                            | 0.727343665                             | 0.01285124                                            | 4.702126952                          |
| 105.2249343                                            | 0.975186104                             | 0.057977387                                           | 3.665864912                          |
| 334.1042401                                            | 0.698632685                             | 0.046210694                                           | 4.466560919                          |
| 163.1610125                                            | 0.81755171                              | 0.031812626                                           | 4.257842954                          |
| 98.36836406                                            | 0.906849315                             | 0.03928203                                            | 4.130166975                          |
| 238.5137385                                            | 0.94057725                              | 0.016857373                                           | 4.587025282                          |
| 41.11180282                                            | 0.930769231                             | 0.103166406                                           | 3.230200881                          |
| 59.03846154                                            | 0.923076923                             | 0.129928095                                           | 2.984467967                          |
| 556.4691018                                            | 0.758126388                             | 0.01897413                                            | 4.687843792                          |
| 88.95700014                                            | 0.9048583                               | 0.072053794                                           | 4.238999838                          |
| 112.7288698                                            | 0.876294379                             | 0.040773003                                           | 4.123863074                          |
| 336.2925334                                            | 0.752801415                             | 0.030851369                                           | 4.561765731                          |
| 567.279669                                             | 0.637262212                             | 0.041461053                                           | 4.717736667                          |
| 217.8188126                                            | 0.963369963                             | 0.027027004                                           | 4.092116667                          |
| 178.4076183                                            | 0.914705882                             | 0.030975993                                           | 4.549785322                          |
| 47.83303291                                            | 0.945512821                             | 0.183857472                                           | 3.096216879                          |
| 245.8285549                                            | 0.958942898                             | 0.017594372                                           | 4.440667612                          |
| 187.9366645                                            | 0.907692308                             | 0.022214679                                           | 4.275475976                          |

| log.sigma.4.0.mm.3D_glrIm_HighGrayLevelRunEmphasis | log.sigma.4.0.mm.3D_glrIm_RunLengthNonUniformityNormalized | log.sigma.4.0.mm.3D_glszm_GrayLevelVariance |
|----------------------------------------------------|------------------------------------------------------------|---------------------------------------------|
| 149.3338907                                        | 0.81900665                                                 | 19.4098615                                  |
| 118.8816128                                        | 0.704444573                                                | 14.23646639                                 |
| 64.46288419                                        | 0.858803972                                                | 13.84595041                                 |
| 206.9535353                                        | 0.790370867                                                | 27.61287093                                 |
| 185.6967436                                        | 0.931630837                                                | 37.91836735                                 |
| 55.55583571                                        | 0.810434641                                                | 8.24994749                                  |
| 34.30558911                                        | 0.875932717                                                | 5.543333333                                 |
| 117.30266                                          | 0.856282792                                                | 24.16430363                                 |
| 380.2889676                                        | 0.872773727                                                | 55.87849061                                 |
| 154.5054865                                        | 0.702420431                                                | 18.89530246                                 |
| 76.71389348                                        | 0.825534642                                                | 11.85376181                                 |
| 118.2740538                                        | 0.795842095                                                | 20.13632147                                 |
| 65.87481904                                        | 0.753239568                                                | 17.42355176                                 |
| 84.63157998                                        | 0.812905667                                                | 16.24268525                                 |
| 91.37851616                                        | 0.870428795                                                | 14.8414997                                  |
| 161.4821844                                        | 0.423578928                                                | 14.41166547                                 |
| 102.3246877                                        | 0.912362651                                                | 16.54909091                                 |
| 81.40024712                                        | 0.757194934                                                | 14.2078067                                  |
| 134.7632558                                        | 0.904242024                                                | 29.49450804                                 |
| 87.5098171                                         | 0.635707123                                                | 10.18938154                                 |
| 94.82313208                                        | 0.583007542                                                | 14.26705515                                 |
| 88.88899563                                        | 0.806258246                                                | 19.88088339                                 |
| 134.1739889                                        | 0.623192913                                                | 16.86530835                                 |
| 264.2464432                                        | 0.912182328                                                | 34.78895464                                 |
| 69.51424434                                        | 0.694115749                                                | 11.60477367                                 |
| 76.58421694                                        | 0.826184993                                                | 12.98824213                                 |
| 92.74929936                                        | 0.62832982                                                 | 13.78361585                                 |
| 137.2916469                                        | 0.551330632                                                | 14.60983872                                 |
| 170.7095096                                        | 0.632350144                                                | 19.35785955                                 |
| 127.7280638                                        | 0.688704726                                                | 17.30121494                                 |
| 115.9646021                                        | 0.59957905                                                 | 16.48732263                                 |
| 133.8342542                                        | 0.545407905                                                | 14.78011771                                 |
| 114.0602202                                        | 0.791917348                                                | 22.80908484                                 |
| 86.47928994                                        | 0.939156364                                                | 24.49                                       |
| 184.0321283                                        | 0.92119186                                                 | 31.14698225                                 |
| 119.3412612                                        | 0.795518702                                                | 16.34670736                                 |
| 128.6412118                                        | 0.527945162                                                | 13.13273158                                 |
| 90.80387225                                        | 0.668181047                                                | 14.98736899                                 |
| 140.449685                                         | 0.874443732                                                | 22.83643802                                 |
| 99.63030914                                        | 0.82496408                                                 | 15.76                                       |
| 176.5430592                                        | 0.769510677                                                | 19.33374023                                 |
| 119.1970308                                        | 0.835240352                                                | 20.35246623                                 |
| 91.02415647                                        | 0.826887507                                                | 14.24538567                                 |
| 101.9014131                                        | 0.839483874                                                | 21.55626667                                 |
| 118.0845892                                        | 0.821448254                                                | 20.78491295                                 |
| 79.87651465                                        | 0.428925831                                                | 6.274708296                                 |
| 170.8209905                                        | 0.827715122                                                | 33.08250711                                 |
| 55.10055544                                        | 0.822786133                                                | 10.71712018                                 |
| 86.27546669                                        | 0.926413015                                                | 14.95918367                                 |
| 257.2224753                                        | 0.935850209                                                | 34.6645541                                  |
| 118.67005                                          | 0.600047701                                                | 15.91233962                                 |
| 56.60378153                                        | 0.806873337                                                | 9.16940894                                  |
| 144.6953569                                        | 0.737492549                                                | 17.3380102                                  |
| 78.46280818                                        | 0.8199722                                                  | 13.09291563                                 |
| 123.7286491                                        | 0.48875147                                                 | 10.9023804                                  |
| 119.4929049                                        | 0.877086762                                                | 21.35566327                                 |
| 159.4806642                                        | 0.880238418                                                | 21.50957276                                 |
| 228.6229613                                        | 0.912434333                                                | 29.3030264                                  |
| 106.5690805                                        | 0.829457957                                                | 20.8331                                     |
| 78.41038746                                        | 0.769756371                                                | 13.41865266                                 |
| 86.18329483                                        | 0.763100332                                                | 13.31987781                                 |
| 197.1834418                                        | 0.652010861                                                | 28.14004729                                 |
| 92.24659775                                        | 0.590547595                                                | 10.02420948                                 |
| 86.04904142                                        | 0.669678609                                                | 7.765967857                                 |
| 88.22222646                                        | 0.910436235                                                | 14.80621302                                 |
| 137.1273732                                        | 0.799781392                                                | 19.01940989                                 |
| 142.9715197                                        | 0.905368784                                                | 22.4124346                                  |
| 107.7730158                                        | 0.697598517                                                | 17.66185684                                 |
| 67.21608348                                        | 0.852105678                                                | 10.80968858                                 |
| 105.0816615                                        | 0.729109933                                                | 14.34212803                                 |
| 144.0400731                                        | 0.731610487                                                | 14.3321                                     |
| 86.17743204                                        | 0.803277797                                                | 14.67979592                                 |
| 124.561159                                         | 0.549434585                                                | 11.34428465                                 |
| 73.91659559                                        | 0.509243129                                                | 9.810356653                                 |
| 158.0263173                                        | 0.504541024                                                | 18.43972913                                 |
| 141.7542421                                        | 0.850504136                                                | 20.60563943                                 |
| 84.56511023                                        | 0.819124325                                                | 12.69794788                                 |
| 39.11765517                                        | 0.830757425                                                | 11.18408707                                 |
| 134.9826562                                        | 0.801459504                                                | 17.49255198                                 |
| 169.576339                                         | 0.670673086                                                | 18.67340869                                 |
| 123.4159879                                        | 0.911482664                                                | 18.01021468                                 |
| 196.5134778                                        | 0.827986618                                                | 26.91067906                                 |
| 245.7066377                                        | 0.648240815                                                | 21.6145819                                  |
| 97.84247882                                        | 0.95065408                                                 | 15.3610586                                  |
| 87.56824254                                        | 0.608686522                                                | 12.29859886                                 |
| 90.46712438                                        | 0.717715312                                                | 12.56193858                                 |
| 79.59380619                                        | 0.834528294                                                | 15.7405887                                  |
| 208.3599163                                        | 0.889924981                                                | 24.7248852                                  |
| 35.50953348                                        | 0.870285168                                                | 6.26446281                                  |
| 50.78846154                                        | 0.851239669                                                | 11.50617284                                 |
| 179.8704535                                        | 0.68643093                                                 | 19.76330579                                 |
| 72.00829463                                        | 0.830787376                                                | 17.93571752                                 |
| 75.74696239                                        | 0.78568663                                                 | 12.53081597                                 |
| 112.034504                                         | 0.656235966                                                | 13.77920898                                 |
| 109.6399528                                        | 0.560786437                                                | 15.26871753                                 |
| 196.2594461                                        | 0.929013447                                                | 30.45706371                                 |
| 145.4483207                                        | 0.847331668                                                | 22.45387269                                 |
| 42.07416135                                        | 0.89191463                                                 | 7.597633136                                 |
| 217.0219508                                        | 0.919971664                                                | 27.00988415                                 |
| 140.0098521                                        | 0.833550203                                                | 19.06249174                                 |

| log.sigma.4.0.mm.3D_glszm_SmallAreaHighGrayLevelEmphasis | log.sigma.4.0.mm.3D_glszm_GrayLevelNonUniformityNormalized | log.sigma.4.0.mm.3D_glszm_SizeZoneNonUniformityNormalized |
|----------------------------------------------------------|------------------------------------------------------------|-----------------------------------------------------------|
| 105.1602567                                              | 0.067036011                                                | 0.318116343                                               |
| 87.60443309                                              | 0.076740036                                                | 0.344586556                                               |
| 55.20794885                                              | 0.081652893                                                | 0.295867769                                               |
| 187.1375685                                              | 0.055839878                                                | 0.393194445                                               |
| 168.1925309                                              | 0.049130763                                                | 0.533383724                                               |
| 60.71908649                                              | 0.105650074                                                | 0.364839319                                               |
| 22.74085658                                              | 0.133333333                                                | 0.308888889                                               |
| 111.0206374                                              | 0.062017747                                                | 0.34837963                                                |
| 245.5637983                                              | 0.039242601                                                | 0.362434633                                               |
| 122.169446                                               | 0.069846189                                                | 0.342975207                                               |
| 75.36887864                                              | 0.092325142                                                | 0.355614367                                               |
| 99.29363308                                              | 0.065441052                                                | 0.346517119                                               |
| 77.63727488                                              | 0.074512382                                                | 0.322594784                                               |
| 96.16638734                                              | 0.072628116                                                | 0.380540166                                               |
| 88.50475966                                              | 0.075877802                                                | 0.352311049                                               |
| 114.9481273                                              | 0.082966131                                                | 0.349360475                                               |
| 87.67375281                                              | 0.07107438                                                 | 0.392727273                                               |
| 94.62504277                                              | 0.079138592                                                | 0.396896699                                               |
| 138.3086633                                              | 0.051913516                                                | 0.422592207                                               |
| 61.82011498                                              | 0.090647867                                                | 0.306959805                                               |
| 71.04442614                                              | 0.080874089                                                | 0.314172737                                               |
| 86.60836143                                              | 0.064100556                                                | 0.30640614                                                |
| 98.24480698                                              | 0.073534272                                                | 0.344933571                                               |
| 182.8884616                                              | 0.05095332                                                 | 0.459237344                                               |
| 61.97549561                                              | 0.087799168                                                | 0.391129032                                               |
| 66.91720706                                              | 0.087530846                                                | 0.318623893                                               |
| 78.50554189                                              | 0.078125977                                                | 0.304601656                                               |
| 89.7220824                                               | 0.080408487                                                | 0.324046533                                               |
| 120.9629807                                              | 0.064554419                                                | 0.354983362                                               |
| 78.58466438                                              | 0.066279192                                                | 0.341129512                                               |
| 102.8214702                                              | 0.075583696                                                | 0.376222511                                               |
| 118.7055934                                              | 0.080263388                                                | 0.408920226                                               |
| 110.1380844                                              | 0.061777481                                                | 0.343037268                                               |
| 56.30277778                                              | 0.1                                                        | 0.46                                                      |
| 159.0534872                                              | 0.056094675                                                | 0.441420118                                               |
| 108.4056783                                              | 0.072406648                                                | 0.345389847                                               |
| 82.59943189                                              | 0.079176638                                                | 0.353081953                                               |
| 88.53148814                                              | 0.076484816                                                | 0.350067186                                               |
| 104.0831847                                              | 0.063189422                                                | 0.287018774                                               |
| 64.40522125                                              | 0.07904                                                    | 0.297792                                                  |
| 101.7294068                                              | 0.068481445                                                | 0.302001953                                               |
| 122.5560679                                              | 0.068267688                                                | 0.360488588                                               |
| 87.08770222                                              | 0.076378914                                                | 0.365879058                                               |
| 113.1750331                                              | 0.066755556                                                | 0.396888889                                               |
| 96.67048682                                              | 0.065852076                                                | 0.31541955                                                |
| 43.52325814                                              | 0.115030103                                                | 0.317491609                                               |
| 165.9287331                                              | 0.056693914                                                | 0.362732354                                               |
| 65.33395798                                              | 0.087018141                                                | 0.413548753                                               |
| 92.36954365                                              | 0.091836735                                                | 0.469387755                                               |
| 226.1992908                                              | 0.050022635                                                | 0.505885016                                               |
| 89.9939251                                               | 0.070216089                                                | 0.370882626                                               |
| 65.80234464                                              | 0.101052186                                                | 0.395381682                                               |
| 115.7316472                                              | 0.069893973                                                | 0.380231585                                               |
| 52.5453722                                               | 0.086507654                                                | 0.238875044                                               |
| 84.09212034                                              | 0.090044286                                                | 0.360665171                                               |
| 109.5551174                                              | 0.062142857                                                | 0.392959184                                               |
| 147.1755127                                              | 0.062269439                                                | 0.414281221                                               |
| 184.8969542                                              | 0.052625762                                                | 0.406399086                                               |
| 101.1031665                                              | 0.0618                                                     | 0.3704                                                    |
| 62.14987197                                              | 0.082004128                                                | 0.24413586                                                |
| 79.56509331                                              | 0.087273477                                                | 0.423848878                                               |
| 181.2531901                                              | 0.053983362                                                | 0.402234659                                               |
| 79.20598976                                              | 0.093305875                                                | 0.417511764                                               |
| 52.56885347                                              | 0.105875268                                                | 0.314539501                                               |
| 73.37275908                                              | 0.091715976                                                | 0.390532544                                               |
| 114.89201                                                | 0.067243555                                                | 0.363019049                                               |
| 139.0391716                                              | 0.063711911                                                | 0.456448138                                               |
| 82.65418285                                              | 0.072286348                                                | 0.353733364                                               |
| 78.96410115                                              | 0.095588235                                                | 0.539792388                                               |
| 81.07024889                                              | 0.073718642                                                | 0.359077638                                               |
| 115.0019422                                              | 0.0766                                                     | 0.3843125                                                 |
| 95.01560432                                              | 0.081632653                                                | 0.407040816                                               |
| 93.28356887                                              | 0.08822328                                                 | 0.354503076                                               |
| 46.54147384                                              | 0.088627401                                                | 0.341424468                                               |
| 132.5009143                                              | 0.069281595                                                | 0.368090533                                               |
| 117.5420339                                              | 0.066047322                                                | 0.343010597                                               |
| 84.14703115                                              | 0.085081124                                                | 0.386059133                                               |
| 58.76716369                                              | 0.1026459                                                  | 0.47607431                                                |
| 112.8456361                                              | 0.067183365                                                | 0.412400756                                               |
| 135.9738958                                              | 0.067240482                                                | 0.359031083                                               |
| 115.8253939                                              | 0.073060942                                                | 0.405124654                                               |
| 162.4997603                                              | 0.053952153                                                | 0.397818299                                               |
| 180.8523683                                              | 0.061269338                                                | 0.35605389                                                |
| 80.17391304                                              | 0.088846881                                                | 0.584120983                                               |
| 76.80633547                                              | 0.083970214                                                | 0.354763304                                               |
| 89.19019511                                              | 0.083927883                                                | 0.359352611                                               |
| 84.852198                                                | 0.080793082                                                | 0.396104463                                               |
| 180.4327909                                              | 0.058954082                                                | 0.408418367                                               |
| 30.15945707                                              | 0.123966942                                                | 0.384297521                                               |
| 48.44753086                                              | 0.135802469                                                | 0.50617284                                                |
| 134.7012046                                              | 0.067425773                                                | 0.365852464                                               |
| 72.7828291                                               | 0.07129923                                                 | 0.426210955                                               |
| 52.80655751                                              | 0.078559028                                                | 0.309678819                                               |
| 69.33558033                                              | 0.07875                                                    | 0.307636719                                               |
| 85.59743069                                              | 0.072529654                                                | 0.358200176                                               |
| 128.51375                                                | 0.063711911                                                | 0.447368421                                               |
| 144.628186                                               | 0.059940512                                                | 0.387888162                                               |
| 33.41188034                                              | 0.136094675                                                | 0.372781065                                               |
| 165.6660699                                              | 0.05919864                                                 | 0.492400893                                               |
| 94.46379827                                              | 0.0651341                                                  | 0.320914256                                               |

| log.sigma.4.0.mm.3D_glszm_SizeZoneNonUniformity | log.sigma.4.0.mm.3D_glszm_GrayLevelNonUniformity | log.sigma.4.0.mm.3D_glszm_LargeAreaEmphasis | log.sigma.4.0.mm.3D_glszm_ZoneVariance |
|-------------------------------------------------|--------------------------------------------------|---------------------------------------------|----------------------------------------|
| 30.22105263                                     | 6.368421053                                      | 48.53684211                                 | 34.09684211                            |
| 56.51219512                                     | 12.58536585                                      | 757.8841463                                 | 684.6982079                            |
| 16.27272727                                     | 4.490909091                                      | 29                                          | 18.64330579                            |
| 185.9809725                                     | 26.41226216                                      | 215.2156448                                 | 198.5146852                            |
| 33.6031746                                      | 3.095238095                                      | 3.857142857                                 | 1.286974049                            |
| 25.17391304                                     | 7.289855072                                      | 54.31884058                                 | 41.81390464                            |
| 9.266666667                                     | 4                                                | 8.266666667                                 | 2.822222222                            |
| 50.16666667                                     | 8.930555556                                      | 27.9375                                     | 20.18282215                            |
| 209.1247834                                     | 22.64298094                                      | 22.82842288                                 | 16.28475741                            |
| 90.54545455                                     | 18.43939394                                      | 1401.17803                                  | 1324.017777                            |
| 40.89565217                                     | 10.6173913                                       | 70.45217391                                 | 59.7621172                             |
| 53.36363636                                     | 10.07792208                                      | 148.525974                                  | 124.3630039                            |
| 75.48717949                                     | 17.43589744                                      | 494.4529915                                 | 460.3753379                            |
| 57.84210526                                     | 11.03947368                                      | 68.42105263                                 | 56.35457064                            |
| 50.02816901                                     | 10.77464789                                      | 16.73239437                                 | 10.1614759                             |
| 147.0807601                                     | 34.92874109                                      | 63040.05226                                 | 62378.54852                            |
| 43.2                                            | 7.818181818                                      | 7.336363636                                 | 3.444710744                            |
| 103.5900383                                     | 20.65517241                                      | 411.5862069                                 | 376.2270078                            |
| 39.30107527                                     | 4.827956989                                      | 6.387096774                                 | 2.55728986                             |
| 53.10404624                                     | 15.68208092                                      | 3755.595376                                 | 3498.484346                            |
| 97.39354839                                     | 25.07096774                                      | 9789.816129                                 | 9521.807544                            |
| 69.24778761                                     | 14.48672566                                      | 133.9867257                                 | 117.809245                             |
| 84.85365854                                     | 18.08943089                                      | 3427.601626                                 | 3286.706656                            |
| 35.82051282                                     | 3.974358974                                      | 4.474358974                                 | 1.566896778                            |
| 48.5                                            | 10.88709677                                      | 584.6451613                                 | 524.7075963                            |
| 26.44578313                                     | 7.265060241                                      | 43.01204819                                 | 29.7729714                             |
| 66.70776256                                     | 17.10958904                                      | 2481.164384                                 | 2371.918934                            |
| 79.71544715                                     | 19.7804878                                       | 9218.353659                                 | 8967.659214                            |
| 157.6126126                                     | 28.66216216                                      | 3371.279279                                 | 3301.232936                            |
| 57.65088757                                     | 11.20118343                                      | 1246.266272                                 | 1145.910927                            |
| 100.075188                                      | 20.10526316                                      | 7516.973684                                 | 7267.547473                            |
| 267.8427481                                     | 52.57251908                                      | 16782.68244                                 | 16600.82384                            |
| 92.96309963                                     | 16.74169742                                      | 218.4612546                                 | 192.1909015                            |
| 4.6                                             | 1                                                | 2.7                                         | 0.45                                   |
| 28.69230769                                     | 3.646153846                                      | 4.476923077                                 | 1.454674556                            |
| 102.9261745                                     | 21.57718121                                      | 196.3959732                                 | 176.3568308                            |
| 140.8796992                                     | 31.5914787                                       | 17528.27318                                 | 17247.05962                            |
| 106.7704918                                     | 23.32786885                                      | 2081.816393                                 | 1982.993238                            |
| 33.58119658                                     | 7.393162393                                      | 17.5982906                                  | 10.07100592                            |
| 37.224                                          | 9.88                                             | 81.496                                      | 63.040384                              |
| 38.65625                                        | 8.765625                                         | 176.0390625                                 | 144.8363647                            |
| 50.10791367                                     | 9.489208633                                      | 39.28776978                                 | 31.77464935                            |
| 86.34745763                                     | 18.02542373                                      | 98.33898305                                 | 86.14823327                            |
| 59.53333333                                     | 10.01333333                                      | 44.03333333                                 | 35.46795556                            |
| 85.79411765                                     | 17.91176471                                      | 135.5625                                    | 118.7585289                            |
| 43.49635036                                     | 15.75912409                                      | 60276.81752                                 | 58279.96718                            |
| 267.696477                                      | 41.8401084                                       | 166.501355                                  | 152.6565022                            |
| 34.73809524                                     | 7.30952381                                       | 30.83333333                                 | 23.46598639                            |
| 6.571428571                                     | 1.285714286                                      | 3.285714286                                 | 0.816326531                            |
| 47.55319149                                     | 4.70212766                                       | 3.446808511                                 | 1.034404708                            |
| 116.086262                                      | 21.97763578                                      | 6348.166134                                 | 6178.251161                            |
| 47.05042017                                     | 12.02521008                                      | 83.43697479                                 | 71.96822258                            |
| 170.34375                                       | 31.3125                                          | 999.2566964                                 | 948.3956025                            |
| 12.66037736                                     | 4.58490566                                       | 47.49056604                                 | 27.15557138                            |
| 188.9885496                                     | 47.18320611                                      | 47206.33588                                 | 46740.79761                            |
| 55.01428571                                     | 8.7                                              | 13.72142857                                 | 7.995663265                            |
| 154.9411765                                     | 23.28877005                                      | 20.95187166                                 | 15.51574251                            |
| 94.69098712                                     | 12.26180258                                      | 7.313304721                                 | 3.449464901                            |
| 37.04                                           | 6.18                                             | 40.52                                       | 27.9884                                |
| 17.82191781                                     | 5.98630137                                       | 156.4109589                                 | 115.6610996                            |
| 97.90909091                                     | 20.16017316                                      | 506.3766234                                 | 466.7029853                            |
| 346.3240418                                     | 46.4796748                                       | 3940.139373                                 | 3878.203752                            |
| 120.6608997                                     | 26.96539792                                      | 6410.788927                                 | 6212.066738                            |
| 51.26993865                                     | 17.25766871                                      | 1634.699387                                 | 1515.179495                            |
| 10.15384615                                     | 2.384615385                                      | 7.423076923                                 | 3.267751479                            |
| 93.65891473                                     | 17.34883721                                      | 170.4651163                                 | 150.5278529                            |
| 26.01754386                                     | 3.631578947                                      | 5.385964912                                 | 1.992613112                            |
| 158.8262806                                     | 32.45657016                                      | 1424.069042                                 | 1364.445881                            |
| 36.70588235                                     | 6.5                                              | 13.13235294                                 | 8.709991349                            |
| 97.66911765                                     | 20.05147059                                      | 645.9411765                                 | 602.5363322                            |
| 153.725                                         | 30.64                                            | 799.9725                                    | 757.7549938                            |
| 56.98571429                                     | 11.42857143                                      | 87.56428571                                 | 71.16178571                            |
| 144.6372549                                     | 35.99509804                                      | 15038.21814                                 | 14739.04685                            |
| 147.4953704                                     | 38.28703704                                      | 41753.5                                     | 41124.55862                            |
| 339.7475623                                     | 63.94691224                                      | 39329.7779                                  | 39082.33784                            |
| 56.93975904                                     | 10.96385542                                      | 28.53012048                                 | 21.3115111                             |
| 51.34586466                                     | 11.31578947                                      | 71.47368421                                 | 59.71858217                            |
| 34.75342466                                     | 7.493150685                                      | 45.78082192                                 | 36.3651717                             |
| 94.85217391                                     | 15.45217391                                      | 116.4391304                                 | 100.6816824                            |
| 117.7621951                                     | 22.05487805                                      | 1657.835366                                 | 1589.873438                            |
| 30.78947368                                     | 5.552631579                                      | 7.223684211                                 | 3.380020776                            |
| 108.6043956                                     | 14.72893773                                      | 54.58241758                                 | 44.54303694                            |
| 201.5265018                                     | 34.67844523                                      | 3627.206714                                 | 3551.36908                             |
| 13.43478261                                     | 2.043478261                                      | 2.217391304                                 | 0.400756144                            |
| 134.1005291                                     | 31.74074074                                      | 6674.582011                                 | 6502.264298                            |
| 185.7852998                                     | 43.39071567                                      | 1456.350097                                 | 1410.336048                            |
| 42.38317757                                     | 8.644859813                                      | 56.27102804                                 | 44.63464058                            |
| 114.3571429                                     | 16.50714286                                      | 13.875                                      | 9.449987245                            |
| 8.454545455                                     | 2.727272727                                      | 9.181818182                                 | 4.016528926                            |
| 4.555555556                                     | 1.222222222                                      | 2.555555556                                 | 0.469135802                            |
| 181.0969697                                     | 33.37575758                                      | 1397.064646                                 | 1349.077539                            |
| 40.06382979                                     | 6.70212766                                       | 38.72340426                                 | 28.26437302                            |
| 29.72916667                                     | 7.541666667                                      | 78.91666667                                 | 60.13888889                            |
| 98.44375                                        | 25.2                                             | 2855.1                                      | 2724.854844                            |
| 144.7128713                                     | 29.3019802                                       | 16858.14356                                 | 16538.58369                            |
| 17                                              | 2.421052632                                      | 3.815789474                                 | 1.067174515                            |
| 79.51707317                                     | 12.28780488                                      | 52.89756098                                 | 41.89458656                            |
| 4.846153846                                     | 1.769230769                                      | 4.769230769                                 | 1.360946746                            |
| 47.7628866                                      | 5.742268604                                      | 4.87628866                                  | 2.052502923                            |
| 27.91954023                                     | 5.666666667                                      | 33.6091954                                  | 23.25115603                            |

| log.sigma.4.0.mm.3D_glszm_ZonePercentage | log.sigma.4.0.mm.3D_glszm_LargeAreaLowGrayLevelEmphasis | log.sigma.4.0.mm.3D_glszm_LargeAreaHighGrayLevelEmphasis | log.sigma.4.0.mm.3D_glszm_HighGrayLevelZoneEmphasis |
|------------------------------------------|---------------------------------------------------------|----------------------------------------------------------|-----------------------------------------------------|
| 0.263157895                              | 0.630207483                                             | 6252.589474                                              | 169.5368421                                         |
| 0.116892373                              | 5.799258039                                             | 119582.4756                                              | 123.7195122                                         |
| 0.310734463                              | 1.398503484                                             | 1358.854545                                              | 87.18181818                                         |
| 0.244697362                              | 1.286496748                                             | 44142.14376                                              | 262.6807611                                         |
| 0.623762376                              | 0.102814298                                             | 566.047619                                               | 208.1587302                                         |
| 0.282786885                              | 2.639885035                                             | 1622.811594                                              | 86.4057971                                          |
| 0.428571429                              | 0.841271761                                             | 244.3333333                                              | 38.03333333                                         |
| 0.359102244                              | 0.604895286                                             | 2084.201389                                              | 160.4375                                            |
| 0.390921409                              | 0.157665305                                             | 9878.202773                                              | 379.3795494                                         |
| 0.113842173                              | 9.818277171                                             | 218811.8598                                              | 189.1780303                                         |
| 0.305851064                              | 1.842823282                                             | 3185.834783                                              | 108.7478261                                         |
| 0.20343461                               | 2.040230887                                             | 15252.54545                                              | 147.3571429                                         |
| 0.171303075                              | 15.75607188                                             | 18864.8547                                               | 115.2136752                                         |
| 0.287878788                              | 2.418322988                                             | 2948.953947                                              | 133.6513158                                         |
| 0.39010989                               | 0.972836792                                             | 842.9225352                                              | 125.2394366                                         |
| 0.03888068                               | 360.3907567                                             | 11152534.17                                              | 176.9287411                                         |
| 0.506912442                              | 0.478184981                                             | 464.1636364                                              | 124.7090909                                         |
| 0.168170103                              | 9.663107724                                             | 25212.09195                                              | 128.394636                                          |
| 0.510989011                              | 0.741827439                                             | 583.7419355                                              | 173.7526882                                         |
| 0.062364816                              | 45.4593528                                              | 405716.7803                                              | 96.79768786                                         |
| 0.061083744                              | 88.59893622                                             | 1176852.913                                              | 106.3032258                                         |
| 0.248624862                              | 3.224482006                                             | 7725.243363                                              | 133.4070796                                         |
| 0.084246575                              | 23.53120781                                             | 540920.2114                                              | 143.5650407                                         |
| 0.586466165                              | 0.070862708                                             | 1162.205128                                              | 262.1025641                                         |
| 0.129166667                              | 10.1665344                                              | 41931.17742                                              | 83.71774194                                         |
| 0.274834437                              | 1.252330992                                             | 2995.963855                                              | 95.95180723                                         |
| 0.095674967                              | 26.20409866                                             | 253968.9041                                              | 123.5068493                                         |
| 0.063157895                              | 50.81700608                                             | 1736383.687                                              | 132.5                                               |
| 0.119483315                              | 14.47894674                                             | 823527.527                                               | 176.0022523                                         |
| 0.0998228                                | 8.587310062                                             | 220219.3846                                              | 117.7751479                                         |
| 0.063318258                              | 56.65337162                                             | 1091866.256                                              | 145.6428571                                         |
| 0.074153742                              | 110.2658195                                             | 2653493.649                                              | 170.1725191                                         |
| 0.195104392                              | 3.12657126                                              | 24970.69373                                              | 154.0848708                                         |
| 0.666666667                              | 0.201374948                                             | 216.4                                                    | 86.9                                                |
| 0.575221239                              | 0.067911932                                             | 719.4615385                                              | 207.0153846                                         |
| 0.223388306                              | 2.577461178                                             | 17946.58389                                              | 155.6342282                                         |
| 0.059632342                              | 105.118981                                              | 3034528.381                                              | 120.1177945                                         |
| 0.100593668                              | 29.07436871                                             | 203670.9475                                              | 131.3442623                                         |
| 0.364485981                              | 0.77343219                                              | 1739.803419                                              | 171.3846154                                         |
| 0.232774674                              | 2.058753168                                             | 6479.056                                                 | 111.8                                               |
| 0.179020979                              | 1.075790274                                             | 34309.29688                                              | 180.703125                                          |
| 0.364829396                              | 0.638546                                                | 2853.302158                                              | 164.5251799                                         |
| 0.286407767                              | 1.730655165                                             | 6778.762712                                              | 122.1059322                                         |
| 0.341685649                              | 1.405323188                                             | 2115.106667                                              | 153.3646667                                         |
| 0.243946188                              | 2.135200751                                             | 10962.55147                                              | 156.0110294                                         |
| 0.022378308                              | 609.5767618                                             | 6291033.482                                              | 68.18978102                                         |
| 0.268754552                              | 1.63326507                                              | 20817.82385                                              | 238.1775068                                         |
| 0.368421053                              | 2.721375754                                             | 748.5833333                                              | 84.5952381                                          |
| 0.636363636                              | 0.357644612                                             | 203.7857143                                              | 106.5714286                                         |
| 0.643835616                              | 0.101867077                                             | 706.4042553                                              | 286.5957447                                         |
| 0.076715686                              | 45.23690246                                             | 971559.7732                                              | 131.4920128                                         |
| 0.29528536                               | 3.754438565                                             | 2313.378151                                              | 88.66386555                                         |
| 0.140219092                              | 6.371310423                                             | 188655.5112                                              | 160.4821429                                         |
| 0.221757322                              | 2.47146227                                              | 3356.245283                                              | 94.77358491                                         |
| 0.046347072                              | 323.7832113                                             | 7034923.359                                              | 124.870229                                          |
| 0.417910448                              | 0.361716532                                             | 1220.6                                                   | 149.2071429                                         |
| 0.428899083                              | 0.274473767                                             | 2102.221925                                              | 196.328877                                          |
| 0.508733624                              | 0.218271795                                             | 1331.570815                                              | 258.4420601                                         |
| 0.282485876                              | 0.769148093                                             | 3561.44                                                  | 138.99                                              |
| 0.156652361                              | 4.435503212                                             | 9835.424658                                              | 108.5479452                                         |
| 0.158762887                              | 8.949963885                                             | 36334.24242                                              | 108.1082251                                         |
| 0.127066116                              | 17.58009419                                             | 946337.2776                                              | 248.116144                                          |
| 0.070937653                              | 70.00077729                                             | 665886.0381                                              | 109.9550173                                         |
| 0.091470258                              | 20.03835887                                             | 165688.6135                                              | 85.9202454                                          |
| 0.490566038                              | 0.317145053                                             | 694.8461538                                              | 96.5                                                |
| 0.223958333                              | 1.650684275                                             | 24954.12403                                              | 164.5116279                                         |
| 0.542857143                              | 0.220878971                                             | 595.0877193                                              | 173.2280702                                         |
| 0.129506778                              | 12.41588426                                             | 226967.4321                                              | 124.2249443                                         |
| 0.475524476                              | 0.931122353                                             | 385                                                      | 93.94117647                                         |
| 0.151785714                              | 6.951486458                                             | 76114.36029                                              | 115.5220588                                         |
| 0.153905348                              | 6.133007165                                             | 128270.04                                                | 163.905                                             |
| 0.24691358                               | 1.880440745                                             | 5845.264286                                              | 122.5428571                                         |
| 0.057814936                              | 95.02684987                                             | 2547489.228                                              | 134.6740196                                         |
| 0.039874469                              | 456.8835718                                             | 4157893.095                                              | 70.59259259                                         |
| 0.063571871                              | 219.5223865                                             | 7193500.16                                               | 199.8569881                                         |
| 0.372197309                              | 0.472732287                                             | 2449.427711                                              | 182.0180723                                         |
| 0.291666667                              | 1.609677405                                             | 3943.406015                                              | 115.2706767                                         |
| 0.325892857                              | 5.937556252                                             | 666.9178082                                              | 69.82191781                                         |
| 0.251916758                              | 0.982034                                                | 16644.82174                                              | 155.0956522                                         |
| 0.121301775                              | 8.547060317                                             | 350680.747                                               | 198.2987805                                         |
| 0.510067114                              | 0.213442495                                             | 579.6578947                                              | 154.2236842                                         |
| 0.315606936                              | 0.380491964                                             | 9651.278388                                              | 233.8278388                                         |
| 0.114830594                              | 12.60908601                                             | 1075102.648                                              | 269.4823322                                         |
| 0.741935484                              | 0.090637011                                             | 211.6956522                                              | 99.52173913                                         |
| 0.07617896                               | 70.52002152                                             | 710412.7381                                              | 111.9285714                                         |
| 0.147419447                              | 21.50728317                                             | 109353.3366                                              | 128.6344294                                         |
| 0.293150685                              | 1.55597938                                              | 2840.102804                                              | 114.0654206                                         |
| 0.475382003                              | 0.154586078                                             | 2004.728571                                              | 250.0464286                                         |
| 0.44                                     | 0.696235391                                             | 225.5                                                    | 43.36363636                                         |
| 0.692307692                              | 0.21519125                                              | 101.3333333                                              | 57.44444444                                         |
| 0.144356955                              | 6.108959413                                             | 351523.3111                                              | 197.0565657                                         |
| 0.309210526                              | 2.198750254                                             | 1544.042553                                              | 98.55319149                                         |
| 0.230769231                              | 1.448467185                                             | 6303.5625                                                | 86.5625                                             |
| 0.08762322                               | 24.85089451                                             | 389920.3188                                              | 112.346875                                          |
| 0.055940183                              | 130.8584088                                             | 2340367.626                                              | 128.1856436                                         |
| 0.603174603                              | 0.062248645                                             | 731.5789474                                              | 192.6842105                                         |
| 0.301470588                              | 1.061586261                                             | 5141.531707                                              | 203.8487805                                         |
| 0.541666667                              | 0.849303458                                             | 163.1538462                                              | 47.38461538                                         |
| 0.595092025                              | 0.056406706                                             | 1015.329897                                              | 222.4329897                                         |
| 0.310714286                              | 0.326327268                                             | 4788.413793                                              | 145.6896552                                         |

| log.sigma.4.0.mm.3D_glszm_SmallAreaEmphasis | log.sigma.4.0.mm.3D_glszm_LowGrayLevelZoneEmphasis | log.sigma.4.0.mm.3D_glszm_ZoneEntropy | log.sigma.4.0.mm.3D_glszm_SmallAreaLowGrayLevelEmphasis |
|---------------------------------------------|----------------------------------------------------|---------------------------------------|---------------------------------------------------------|
| 0.583363922                                 | 0.024047422                                        | 5.470870051                           | 0.016527166                                             |
| 0.609697545                                 | 0.028847807                                        | 5.493272165                           | 0.014754752                                             |
| 0.547527367                                 | 0.04488159                                         | 5.018193014                           | 0.013107723                                             |
| 0.650388364                                 | 0.009832697                                        | 6.073634017                           | 0.006614618                                             |
| 0.755925926                                 | 0.032173401                                        | 5.123717423                           | 0.027503408                                             |
| 0.62489005                                  | 0.037643209                                        | 6.649898328                           | 0.023983571                                             |
| 0.55832842                                  | 0.084432039                                        | 4.294739663                           | 0.032248002                                             |
| 0.60504777                                  | 0.031264964                                        | 5.713322983                           | 0.011722467                                             |
| 0.62258324                                  | 0.008627777                                        | 6.551136524                           | 0.005540117                                             |
| 0.60751391                                  | 0.014547608                                        | 5.840921335                           | 0.00922734                                              |
| 0.615309402                                 | 0.0290706                                          | 5.183668909                           | 0.018027745                                             |
| 0.608877442                                 | 0.023983303                                        | 5.637896281                           | 0.009580267                                             |
| 0.582157805                                 | 0.0453943                                          | 5.749280323                           | 0.026233215                                             |
| 0.636291793                                 | 0.025366564                                        | 5.426975386                           | 0.009465306                                             |
| 0.612909585                                 | 0.023020493                                        | 5.49897373                            | 0.014354477                                             |
| 0.612433607                                 | 0.013192361                                        | 5.76985353                            | 0.005205625                                             |
| 0.640332562                                 | 0.036078947                                        | 5.165698128                           | 0.012846119                                             |
| 0.654392435                                 | 0.023766078                                        | 5.539308439                           | 0.009127436                                             |
| 0.674334495                                 | 0.030561065                                        | 5.333641242                           | 0.008371421                                             |
| 0.570745161                                 | 0.026296557                                        | 5.438074746                           | 0.014030999                                             |
| 0.578906443                                 | 0.029816398                                        | 5.875173576                           | 0.015287793                                             |
| 0.566076116                                 | 0.028733347                                        | 5.891942961                           | 0.013895505                                             |
| 0.609143746                                 | 0.023491273                                        | 5.724019935                           | 0.015462157                                             |
| 0.702854236                                 | 0.023334628                                        | 5.339907271                           | 0.018351939                                             |
| 0.648819461                                 | 0.045529828                                        | 5.095024854                           | 0.017971516                                             |
| 0.58021436                                  | 0.047438759                                        | 5.133368949                           | 0.023963894                                             |
| 0.571273885                                 | 0.021737367                                        | 5.748171874                           | 0.007362291                                             |
| 0.590954096                                 | 0.019406267                                        | 5.828711608                           | 0.012146058                                             |
| 0.618326033                                 | 0.014453647                                        | 6.039741073                           | 0.008595787                                             |
| 0.606359348                                 | 0.03968721                                         | 5.631290486                           | 0.029441909                                             |
| 0.637078415                                 | 0.022102078                                        | 5.704442957                           | 0.012831805                                             |
| 0.664334192                                 | 0.014488872                                        | 5.692159469                           | 0.009289655                                             |
| 0.605033245                                 | 0.028229577                                        | 5.946352238                           | 0.010599737                                             |
| 0.686111111                                 | 0.141638554                                        | 3.321928095                           | 0.133648899                                             |
| 0.689239316                                 | 0.030389482                                        | 5.064449928                           | 0.026774864                                             |
| 0.608311193                                 | 0.018092074                                        | 5.770042856                           | 0.010046495                                             |
| 0.61753231                                  | 0.019399547                                        | 5.84239041                            | 0.011335687                                             |
| 0.613638229                                 | 0.022400332                                        | 5.679820199                           | 0.00938893                                              |
| 0.538314077                                 | 0.024632546                                        | 5.626578023                           | 0.007087913                                             |
| 0.562536188                                 | 0.039881159                                        | 5.527204486                           | 0.029240673                                             |
| 0.5596808                                   | 0.019888433                                        | 5.604334352                           | 0.01477436                                              |
| 0.620034819                                 | 0.020797331                                        | 5.444234825                           | 0.013133537                                             |
| 0.626664071                                 | 0.023078563                                        | 5.558974099                           | 0.009543373                                             |
| 0.653449348                                 | 0.031523655                                        | 5.376100357                           | 0.009928194                                             |
| 0.578683325                                 | 0.020312058                                        | 6.001243143                           | 0.008406094                                             |
| 0.582716804                                 | 0.03179298                                         | 5.130065966                           | 0.017339577                                             |
| 0.623497891                                 | 0.010880762                                        | 6.284782238                           | 0.005835136                                             |
| 0.666839562                                 | 0.046931856                                        | 4.805135131                           | 0.014709231                                             |
| 0.708829365                                 | 0.083849846                                        | 3.664497779                           | 0.024676948                                             |
| 0.738956856                                 | 0.01840797                                         | 5.229021203                           | 0.006806403                                             |
| 0.632935561                                 | 0.022966482                                        | 5.799751277                           | 0.014988125                                             |
| 0.653141679                                 | 0.031508914                                        | 4.867640229                           | 0.012567446                                             |
| 0.641050379                                 | 0.017915996                                        | 5.860086198                           | 0.009447173                                             |
| 0.495562172                                 | 0.04318698                                         | 5.088782662                           | 0.010460358                                             |
| 0.623851252                                 | 0.016835372                                        | 5.734808697                           | 0.009386183                                             |
| 0.650970442                                 | 0.026170121                                        | 5.563221861                           | 0.010259825                                             |
| 0.669031366                                 | 0.013716444                                        | 5.832158615                           | 0.009842711                                             |
| 0.658919079                                 | 0.014527551                                        | 5.74808937                            | 0.006260128                                             |
| 0.629246756                                 | 0.030521222                                        | 5.43617463                            | 0.012670234                                             |
| 0.494038781                                 | 0.033345054                                        | 5.294152258                           | 0.00908739                                              |
| 0.676307274                                 | 0.031177197                                        | 5.371293875                           | 0.020730272                                             |
| 0.659172587                                 | 0.009415038                                        | 6.213450046                           | 0.004739565                                             |
| 0.671835507                                 | 0.020639616                                        | 5.252298426                           | 0.010346545                                             |
| 0.577908175                                 | 0.027377597                                        | 5.294371578                           | 0.017068228                                             |
| 0.622582472                                 | 0.065154749                                        | 4.180832987                           | 0.020220171                                             |
| 0.62216371                                  | 0.021646474                                        | 5.726014592                           | 0.008181124                                             |
| 0.69715141                                  | 0.033090352                                        | 4.812908164                           | 0.012149602                                             |
| 0.618109746                                 | 0.028667371                                        | 5.906168208                           | 0.009192967                                             |
| 0.760168292                                 | 0.034821033                                        | 4.418859577                           | 0.025153542                                             |
| 0.620238275                                 | 0.025463912                                        | 5.606299252                           | 0.013936164                                             |
| 0.644266334                                 | 0.013659997                                        | 5.658764961                           | 0.0064935                                               |
| 0.660861829                                 | 0.026507107                                        | 5.182796445                           | 0.011360524                                             |
| 0.618008071                                 | 0.015108007                                        | 5.624877608                           | 0.006296815                                             |
| 0.604465499                                 | 0.050927288                                        | 5.585628007                           | 0.023321952                                             |
| 0.629468153                                 | 0.010796651                                        | 6.080036175                           | 0.00643306                                              |
| 0.592315748                                 | 0.023950466                                        | 5.554345424                           | 0.012933585                                             |
| 0.643556058                                 | 0.026908658                                        | 5.122624556                           | 0.018331903                                             |
| 0.711590747                                 | 0.066264553                                        | 4.66688582                            | 0.028109305                                             |
| 0.667495644                                 | 0.018503314                                        | 5.590011393                           | 0.009247401                                             |
| 0.621718447                                 | 0.012235266                                        | 5.861769046                           | 0.007754809                                             |
| 0.658309373                                 | 0.028631554                                        | 4.827554659                           | 0.010826027                                             |
| 0.653877751                                 | 0.013423981                                        | 5.961143079                           | 0.01033128                                              |
| 0.6191343                                   | 0.008170249                                        | 6.153991383                           | 0.005505803                                             |
| 0.792270531                                 | 0.068490374                                        | 4.023136956                           | 0.064631117                                             |
| 0.618005874                                 | 0.030006279                                        | 5.673194533                           | 0.014188715                                             |
| 0.621330866                                 | 0.019302826                                        | 5.714419652                           | 0.011215516                                             |
| 0.653543481                                 | 0.031220263                                        | 5.192034971                           | 0.020127479                                             |
| 0.660513648                                 | 0.01276065                                         | 5.6913073                             | 0.006260504                                             |
| 0.633616723                                 | 0.12011423                                         | 3.970573096                           | 0.104181474                                             |
| 0.734567901                                 | 0.141094028                                        | 2.947702779                           | 0.130285772                                             |
| 0.62842346                                  | 0.0127992                                          | 6.019434082                           | 0.005824857                                             |
| 0.672990897                                 | 0.050217792                                        | 5.124393141                           | 0.030823598                                             |
| 0.573226556                                 | 0.037206685                                        | 5.449611267                           | 0.024145488                                             |
| 0.568334473                                 | 0.0325521                                          | 5.812954219                           | 0.016724416                                             |
| 0.619937408                                 | 0.020767536                                        | 5.738852352                           | 0.01173603                                              |
| 0.693669591                                 | 0.036069721                                        | 4.787143961                           | 0.033527653                                             |
| 0.646274828                                 | 0.01537789                                         | 5.705257326                           | 0.005666138                                             |
| 0.616324786                                 | 0.116354386                                        | 3.39274741                            | 0.033120729                                             |
| 0.728532272                                 | 0.019204892                                        | 5.201738523                           | 0.015626036                                             |
| 0.584750068                                 | 0.02803164                                         | 5.526292853                           | 0.018979391                                             |

| log.sigma.4.0.mm.3D_ngtdm_Coarseness | log.sigma.4.0.mm.3D_ngtdm_Complexity | log.sigma.4.0.mm.3D_ngtdm_Strength | log.sigma.4.0.mm.3D_ngtdm_Busyness | log.sigma.4.0.mm.3D_ngtdm_Contrast |
|--------------------------------------|--------------------------------------|------------------------------------|------------------------------------|------------------------------------|
| 0.028861136                          | 0.696021999                          | 4.115764592                        | 0.161897105                        | 0.000321729                        |
| 0.008538767                          | 0.093044872                          | 0.96122874                         | 0.528231026                        | 4.42E-05                           |
| 0.048952152                          | 0.789419033                          | 4.037083817                        | 0.230333525                        | 0.000802892                        |
| 0.005477939                          | 0.303910369                          | 1.648145848                        | 0.393168116                        | 3.70E-05                           |
| 0.07760658                           | 6.678260601                          | 16.12639424                        | 0.061914179                        | 0.003496345                        |
| 0.031014199                          | 0.467015324                          | 1.743065574                        | 0.465855301                        | 0.000543079                        |
| 0.088431365                          | 0.789260835                          | 3.107287671                        | 0.271087105                        | 0.002499744                        |
| 0.021064939                          | 0.982382925                          | 3.215134386                        | 0.284252224                        | 0.00043813                         |
| 0.007877299                          | 0.915161298                          | 4.085906579                        | 0.27789309                         | 0.00169851                         |
| 0.005422942                          | 0.093473633                          | 1.077661497                        | 0.528115287                        | 1.43E-05                           |
| 0.019313966                          | 0.61613693                           | 1.959123413                        | 0.381736099                        | 0.000298991                        |
| 0.014303258                          | 0.315274434                          | 2.119425596                        | 0.329111037                        | 0.000109642                        |
| 0.007296522                          | 0.187665618                          | 1.350532118                        | 0.853962486                        | 4.66E-05                           |
| 0.017005882                          | 0.573679935                          | 2.699406349                        | 0.421803074                        | 0.00023179                         |
| 0.023147416                          | 0.893426028                          | 3.472735319                        | 0.270008535                        | 0.000370816                        |
| 0.001136502                          | 0.011047289                          | 0.424604438                        | 1.831746449                        | 7.70E-07                           |
| 0.031518466                          | 1.617547473                          | 4.028836298                        | 0.211972069                        | 0.001080851                        |
| 0.006314245                          | 0.166805496                          | 1.097310072                        | 0.824345532                        | 4.13E-05                           |
| 0.042915499                          | 2.797250169                          | 6.966673182                        | 0.157771283                        | 0.001831166                        |
| 0.005109872                          | 0.032462566                          | 0.517869677                        | 1.086228214                        | 1.58E-05                           |
| 0.002519311                          | 0.023847632                          | 0.457247769                        | 1.394459699                        | 3.77E-06                           |
| 0.010932833                          | 0.293573681                          | 1.632342827                        | 0.580031609                        | 0.000114643                        |
| 0.004494469                          | 0.049509666                          | 0.832509138                        | 0.665311565                        | 8.60E-06                           |
| 0.070532053                          | 3.880151522                          | 15.41833917                        | 0.043209612                        | 0.001991926                        |
| 0.011678112                          | 0.095046849                          | 1.03379193                         | 0.585839998                        | 4.68E-05                           |
| 0.025032174                          | 0.534740721                          | 2.054652919                        | 0.347139141                        | 0.000476097                        |
| 0.005214147                          | 0.060520993                          | 0.929630165                        | 0.73856145                         | 1.04E-05                           |
| 0.003516319                          | 0.038602895                          | 1.052868086                        | 0.710402558                        | 5.15E-06                           |
| 0.003099115                          | 0.073581345                          | 0.912820313                        | 0.672228797                        | 1.00E-05                           |
| 0.008313038                          | 0.07705793                           | 1.080872922                        | 0.4764373                          | 3.54E-05                           |
| 0.003331043                          | 0.03240472                           | 0.62628313                         | 0.937798579                        | 5.37E-06                           |
| 0.001401417                          | 0.01975887                           | 0.383894859                        | 1.759351944                        | 1.95E-06                           |
| 0.007653566                          | 0.262485884                          | 1.558828003                        | 0.513909443                        | 5.94E-05                           |
| 0.207675806                          | 13.22370227                          | 20.50586905                        | 0.07555226                         | 0.098544506                        |
| 0.07125079                           | 4.300336923                          | 11.63125283                        | 0.055545928                        | 0.002057607                        |
| 0.006812046                          | 0.211003394                          | 0.944463793                        | 0.696614817                        | 6.55E-05                           |
| 0.00183968                           | 0.017347614                          | 0.376070102                        | 1.558654687                        | 3.59E-06                           |
| 0.004327032                          | 0.060276564                          | 0.731777871                        | 1.006375796                        | 1.43E-05                           |
| 0.024448505                          | 1.350554378                          | 4.87761651                         | 0.185007849                        | 0.000637467                        |
| 0.017503649                          | 0.400023395                          | 2.029850776                        | 0.411758695                        | 0.000249182                        |
| 0.015530412                          | 0.336606811                          | 2.912293845                        | 0.199139663                        | 8.74E-05                           |
| 0.021568805                          | 1.088953003                          | 3.831623966                        | 0.212772829                        | 0.000314538                        |
| 0.009573731                          | 0.304006864                          | 1.046761363                        | 0.653680827                        | 0.000131838                        |
| 0.02018058                           | 0.983171273                          | 4.28849832                         | 0.284643397                        | 0.000319304                        |
| 0.009039548                          | 0.381733196                          | 2.126932656                        | 0.459933761                        | 8.15E-05                           |
| 0.00207601                           | 0.006434676                          | 0.244288849                        | 2.528865635                        | 2.97E-06                           |
| 0.003894187                          | 0.476168247                          | 3.842333641                        | 0.43249817                         | 1.78E-05                           |
| 0.031357815                          | 0.670690869                          | 2.162404266                        | 0.599910456                        | 0.000942256                        |
| 0.163929921                          | 9.384080698                          | 11.75482955                        | 0.10736295                         | 0.032177868                        |
| 0.04433814                           | 6.04009049                           | 10.30503135                        | 0.081001577                        | 0.003038127                        |
| 0.0033446                            | 0.035185165                          | 0.595083349                        | 0.924028823                        | 6.57E-06                           |
| 0.016701284                          | 0.45615988                           | 1.505689178                        | 0.648862019                        | 0.000305303                        |
| 0.003593841                          | 0.082537964                          | 0.685966335                        | 0.851213472                        | 1.68E-05                           |
| 0.039286821                          | 0.657009908                          | 3.588271213                        | 0.228667307                        | 0.000588855                        |
| 0.001090345                          | 0.009349812                          | 0.241691338                        | 2.656984885                        | 1.50E-06                           |
| 0.024235936                          | 1.07753136                           | 3.056687928                        | 0.254707185                        | 0.000607832                        |
| 0.008770177                          | 0.769348282                          | 2.29131838                         | 0.34340418                         | 0.000123777                        |
| 0.018657687                          | 1.503145928                          | 4.137997472                        | 0.16045811                         | 0.000512883                        |
| 0.029045676                          | 0.721863641                          | 4.061585914                        | 0.196335145                        | 0.000296017                        |
| 0.023717386                          | 0.272912428                          | 2.189822882                        | 0.400294058                        | 0.000203648                        |
| 0.006773239                          | 0.14895998                           | 0.964625745                        | 0.827322629                        | 4.50E-05                           |
| 0.001887945                          | 0.067535539                          | 0.84156597                         | 0.854720612                        | 4.41E-06                           |
| 0.003072139                          | 0.033014867                          | 0.54533407                         | 1.23593572                         | 5.44E-06                           |
| 0.006255028                          | 0.04512639                           | 0.508295687                        | 1.042700603                        | 2.88E-05                           |
| 0.094168852                          | 4.099273107                          | 10.15776249                        | 0.073475039                        | 0.004625293                        |
| 0.008858397                          | 0.312391738                          | 1.741639466                        | 0.372428597                        | 6.59E-05                           |
| 0.057946643                          | 3.884829373                          | 7.277844448                        | 0.096816188                        | 0.003043965                        |
| 0.00376781                           | 0.07349261                           | 0.72700009                         | 0.934395864                        | 1.87E-05                           |
| 0.04705286                           | 1.555649154                          | 4.49871228                         | 0.23698808                         | 0.001316123                        |
| 0.00622378                           | 0.104270047                          | 0.856282685                        | 0.717409292                        | 3.18E-05                           |
| 0.004313128                          | 0.082837589                          | 0.640551388                        | 0.838484919                        | 2.31E-05                           |
| 0.014301496                          | 0.483111165                          | 1.940322349                        | 0.408462639                        | 0.000167563                        |
| 0.001872486                          | 0.019249468                          | 0.379905397                        | 1.529475789                        | 3.32E-06                           |
| 0.001242385                          | 0.005025626                          | 0.121108997                        | 4.50455054                         | 2.92E-06                           |
| 0.000857723                          | 0.015542044                          | 0.38621843                         | 2.135894916                        | 8.13E-07                           |
| 0.016682493                          | 1.200021854                          | 3.231493157                        | 0.249422616                        | 0.000338405                        |
| 0.017391903                          | 0.476465055                          | 1.831159365                        | 0.406056957                        | 0.000226862                        |
| 0.033289874                          | 0.945844237                          | 4.136315046                        | 0.414333307                        | 0.000523606                        |
| 0.009666271                          | 0.302312307                          | 1.376224296                        | 0.406399609                        | 8.59E-05                           |
| 0.004471129                          | 0.093539731                          | 1.032323304                        | 0.520311071                        | 1.17E-05                           |
| 0.044494915                          | 2.495287041                          | 5.144887472                        | 0.150760727                        | 0.001665765                        |
| 0.011278322                          | 0.623252256                          | 2.658914871                        | 0.23616731                         | 0.000107123                        |
| 0.002505598                          | 0.073471001                          | 0.963430763                        | 0.598170787                        | 5.02E-06                           |
| 0.137765161                          | 7.261136299                          | 11.3846937                         | 0.066930579                        | 0.013358356                        |
| 0.002461247                          | 0.025118154                          | 0.347632635                        | 1.675658262                        | 5.91E-06                           |
| 0.003057255                          | 0.059901902                          | 0.510008523                        | 1.400530521                        | 1.03E-05                           |
| 0.02281641                           | 0.727707716                          | 3.253526117                        | 0.287028713                        | 0.000265902                        |
| 0.012550381                          | 1.299055365                          | 2.908578076                        | 0.241046792                        | 0.000309622                        |
| 0.101280067                          | 1.029343007                          | 2.639462071                        | 0.359825481                        | 0.004607775                        |
| 0.224654378                          | 6.597685733                          | 9.22649968                         | 0.139102564                        | 0.070741237                        |
| 0.003504591                          | 0.101821982                          | 1.043100985                        | 0.567193193                        | 1.20E-05                           |
| 0.025549397                          | 0.848579784                          | 3.601099063                        | 0.442126924                        | 0.000561512                        |
| 0.024355106                          | 0.352541779                          | 2.062299215                        | 0.305819077                        | 0.00020717                         |
| 0.003687654                          | 0.035639736                          | 0.461640031                        | 1.196775115                        | 1.31E-05                           |
| 0.00189965                           | 0.01659121                           | 0.320419982                        | 1.799596668                        | 3.58E-06                           |
| 0.062435084                          | 9.24907335                           | 11.85825065                        | 0.080827304                        | 0.00894392                         |
| 0.01414387                           | 0.684875641                          | 2.845358492                        | 0.273558537                        | 0.000185197                        |
| 0.130447057                          | 4.162457588                          | 6.349747414                        | 0.220074984                        | 0.028743983                        |
| 0.048190703                          | 3.072443243                          | 9.944905714                        | 0.077510316                        | 0.001455105                        |
| 0.032104808                          | 0.946346723                          | 4.94118869                         | 0.122547144                        | 0.000348662                        |

| log.sigma.3.5.mm.3D_gldm_GrayLevelVariance | log.sigma.3.5.mm.3D_gldm_HighGrayLevelEmphasis | log.sigma.3.5.mm.3D_gldm_GrayLevelNonUniformityNormalized | log.sigma.3.5.mm.3D_gldm_DependenceEntropy |
|--------------------------------------------|------------------------------------------------|-----------------------------------------------------------|--------------------------------------------|
| 13.80055402                                | 159.066482                                     | 0.07565166                                                | 6.284871202                                |
| 8.913023665                                | 133.6101212                                    | 0.113274731                                               | 6.700583244                                |
| 10.1687893                                 | 55.29378531                                    | 0.092661751                                               | 5.526908345                                |
| 16.4383377                                 | 188.1391619                                    | 0.075925555                                               | 6.937296632                                |
| 30.38290364                                | 136.2079208                                    | 0.060680325                                               | 5.432722002                                |
| 6.048961973                                | 52.38934426                                    | 0.12392502                                                | 5.65805151                                 |
| 5.266326531                                | 42.12857143                                    | 0.135918367                                               | 4.495873068                                |
| 14.66278195                                | 123.2693267                                    | 0.078500756                                               | 5.955471036                                |
| 65.22652366                                | 370.7418699                                    | 0.04034103                                                | 6.960392903                                |
| 8.070115425                                | 141.1694696                                    | 0.107523001                                               | 6.880433129                                |
| 7.736695054                                | 88.78457447                                    | 0.104558058                                               | 5.783569714                                |
| 11.11841047                                | 125.1875826                                    | 0.085477856                                               | 6.556132627                                |
| 8.463096129                                | 70.17642753                                    | 0.104924232                                               | 6.461419797                                |
| 11.96940642                                | 69.85037879                                    | 0.088304924                                               | 6.157667332                                |
| 13.48224852                                | 89.03846154                                    | 0.079126917                                               | 5.777961463                                |
| 3.759984709                                | 169.8599003                                    | 0.270838209                                               | 6.66967327                                 |
| 15.62564506                                | 90.04608295                                    | 0.0733717                                                 | 5.610549704                                |
| 8.726452067                                | 71.86340206                                    | 0.095602448                                               | 6.714902871                                |
| 32.67020891                                | 92.50549451                                    | 0.065873687                                               | 5.491557504                                |
| 7.064092414                                | 98.65465032                                    | 0.121133307                                               | 7.005708715                                |
| 5.027550525                                | 131.7818719                                    | 0.161297154                                               | 6.622780261                                |
| 11.93598546                                | 88.52255226                                    | 0.089217833                                               | 6.467515954                                |
| 6.396481399                                | 149.8955479                                    | 0.135065913                                               | 6.851165224                                |
| 35.6689468                                 | 292.1503759                                    | 0.05387529                                                | 5.726949424                                |
| 5.753332248                                | 93.50729167                                    | 0.123209635                                               | 6.601189244                                |
| 9.812168326                                | 86.05629139                                    | 0.087781238                                               | 5.984478378                                |
| 5.458931837                                | 98.61642639                                    | 0.159057479                                               | 6.780858271                                |
| 6.387861466                                | 160.7214377                                    | 0.202583741                                               | 6.692022338                                |
| 10.28488297                                | 171.9017761                                    | 0.161330111                                               | 6.787866212                                |
| 10.21719048                                | 151.7330183                                    | 0.114024636                                               | 6.735115614                                |
| 6.148166284                                | 132.0514163                                    | 0.149539723                                               | 6.804215577                                |
| 5.273278605                                | 123.450583                                     | 0.188372612                                               | 6.87383675                                 |
| 13.63227374                                | 123.9654428                                    | 0.079463708                                               | 6.760093334                                |
| 21.44888889                                | 87.6                                           | 0.12                                                      | 3.189898095                                |
| 25.0896703                                 | 165.2920354                                    | 0.064139713                                               | 5.466252525                                |
| 10.35141406                                | 134.4550225                                    | 0.085936042                                               | 6.468643739                                |
| 6.243716026                                | 148.5556718                                    | 0.200919171                                               | 6.626330343                                |
| 8.282891788                                | 117.9587731                                    | 0.108763123                                               | 7.014024018                                |
| 21.12347512                                | 137.8442368                                    | 0.064915907                                               | 6.044447422                                |
| 13.23061772                                | 92.16573557                                    | 0.077390427                                               | 6.376297244                                |
| 11.3784811                                 | 162.1356643                                    | 0.087798914                                               | 6.581868233                                |
| 11.46407093                                | 106.488189                                     | 0.091023071                                               | 5.93725688                                 |
| 9.945700584                                | 104.2524272                                    | 0.089190192                                               | 6.277051063                                |
| 14.61704744                                | 105.7129841                                    | 0.078906813                                               | 6.124618927                                |
| 16.99334071                                | 148.0188341                                    | 0.074878642                                               | 6.506755521                                |
| 3.36726814                                 | 75.08232604                                    | 0.253133258                                               | 6.502649433                                |
| 22.41392247                                | 147.3470503                                    | 0.070441864                                               | 6.773355129                                |
| 9.564846876                                | 51.41666667                                    | 0.099915359                                               | 5.586878417                                |
| 18.17561983                                | 113.6818182                                    | 0.08677686                                                | 3.732158891                                |
| 34.20289923                                | 172.1849315                                    | 0.052355038                                               | 5.563131327                                |
| 6.663487541                                | 135.3914216                                    | 0.159441561                                               | 6.840210064                                |
| 8.165754361                                | 57.93300248                                    | 0.109445905                                               | 5.78266119                                 |
| 10.93010607                                | 183.998748                                     | 0.091299247                                               | 6.942798909                                |
| 11.12585564                                | 79.82845188                                    | 0.08292922                                                | 5.994013408                                |
| 5.017504978                                | 114.6257739                                    | 0.232651626                                               | 6.765977123                                |
| 15.39491201                                | 90.0238806                                     | 0.072719982                                               | 6.10997508                                 |
| 17.77724807                                | 164.5149083                                    | 0.069488574                                               | 6.287776399                                |
| 28.62672813                                | 207.941048                                     | 0.053793787                                               | 6.147612195                                |
| 13.21513614                                | 117.2090395                                    | 0.078697054                                               | 6.121888429                                |
| 9.600826134                                | 68.12660944                                    | 0.090782663                                               | 6.303217166                                |
| 9.424695504                                | 81.27216495                                    | 0.093742398                                               | 6.443667023                                |
| 11.4603434                                 | 214.6827037                                    | 0.116932818                                               | 7.111927298                                |
| 5.153398264                                | 97.02896416                                    | 0.151005852                                               | 6.967607778                                |
| 6.161902099                                | 77.71717172                                    | 0.129373924                                               | 6.737937798                                |
| 13.58348167                                | 93.90566038                                    | 0.095763617                                               | 4.635952474                                |
| 13.61976454                                | 165.859375                                     | 0.078712746                                               | 6.625684795                                |
| 17.73297052                                | 122.1619048                                    | 0.068480726                                               | 5.191260727                                |
| 13.13432704                                | 123.4539948                                    | 0.097121993                                               | 7.06327672                                 |
| 8.555626192                                | 50.21678322                                    | 0.114088708                                               | 5.355085369                                |
| 9.142978902                                | 116.2862723                                    | 0.095634616                                               | 6.875948962                                |
| 9.80534793                                 | 156.8687957                                    | 0.092887859                                               | 6.865564396                                |
| 9.066319532                                | 80.55379189                                    | 0.0928461                                                 | 6.165121408                                |
| 6.404964502                                | 121.5451325                                    | 0.163025128                                               | 6.827269481                                |
| 5.043571627                                | 87.19401883                                    | 0.19660516                                                | 6.78765323                                 |
| 5.506579049                                | 168.7191267                                    | 0.209657266                                               | 6.930847261                                |
| 16.01389531                                | 151.9506726                                    | 0.07412174                                                | 6.226517012                                |
| 9.230912396                                | 96.875                                         | 0.097597338                                               | 6.204335172                                |
| 6.60809949                                 | 33.24107143                                    | 0.129703444                                               | 5.535302013                                |
| 11.65814948                                | 155.3953998                                    | 0.08454849                                                | 6.447300439                                |
| 8.380374325                                | 165.2133876                                    | 0.11826934                                                | 6.82824796                                 |
| 14.17260484                                | 119.7516779                                    | 0.088689699                                               | 5.45568975                                 |
| 18.39694744                                | 209.7953757                                    | 0.069031374                                               | 6.623263213                                |
| 9.841407965                                | 263.3221749                                    | 0.132087655                                               | 7.10369293                                 |
| 20.36836629                                | 146.3870968                                    | 0.086368366                                               | 3.937751955                                |
| 5.771824268                                | 97.83434099                                    | 0.145363529                                               | 6.937997078                                |
| 6.446637947                                | 111.9084688                                    | 0.118017499                                               | 6.84273563                                 |
| 9.187134547                                | 70.88493151                                    | 0.095605179                                               | 5.99905082                                 |
| 20.51714367                                | 170.1120543                                    | 0.064317236                                               | 6.233654052                                |
| 5.5664                                     | 47.04                                          | 0.1272                                                    | 4.54346519                                 |
| 12.55621302                                | 69.38461538                                    | 0.159763314                                               | 3.238901257                                |
| 11.96044256                                | 200.287839                                     | 0.110270495                                               | 7.085659833                                |
| 13.93312846                                | 66.01973684                                    | 0.083578601                                               | 5.81454836                                 |
| 9.260147004                                | 84.39903846                                    | 0.094801683                                               | 6.25513334                                 |
| 8.325945123                                | 126.9879518                                    | 0.106877325                                               | 7.057784976                                |
| 6.166564425                                | 102.3433952                                    | 0.167860313                                               | 6.885521131                                |
| 26.53968254                                | 133.3174603                                    | 0.073318216                                               | 4.849985479                                |
| 17.91566609                                | 154.4617647                                    | 0.067634083                                               | 6.377838649                                |
| 13.40104167                                | 57.29166667                                    | 0.121527778                                               | 3.668295834                                |
| 27.50415898                                | 244.8404908                                    | 0.057623546                                               | 5.704634462                                |
| 12.02096939                                | 122.7214286                                    | 0.089005102                                               | 6.04793412                                 |

| log.sigma.3.5.mm.3D_gldm_DependenceNonUniformity | log.sigma.3.5.mm.3D_gldm_GrayLevelNonUniformity | log.sigma.3.5.mm.3D_gldm_SmallDependenceEmphasis |
|--------------------------------------------------|-------------------------------------------------|--------------------------------------------------|
| 54.00831025                                      | 27.31024931                                     | 0.238841931                                      |
| 118.8446187                                      | 158.9244476                                     | 0.118528128                                      |
| 34.84180791                                      | 16.40112994                                     | 0.247819958                                      |
| 236.4102431                                      | 146.7640973                                     | 0.24635476                                       |
| 29.73267327                                      | 6.128712871                                     | 0.433272827                                      |
| 34.98360656                                      | 30.23770492                                     | 0.252346661                                      |
| 16.54285714                                      | 9.514285714                                     | 0.333261905                                      |
| 75.51371571                                      | 31.47880299                                     | 0.348643672                                      |
| 310.0528455                                      | 59.54336043                                     | 0.327573618                                      |
| 195.9081501                                      | 249.3458387                                     | 0.12792513                                       |
| 61.89361702                                      | 39.31382979                                     | 0.26516219                                       |
| 99.55746367                                      | 64.70673712                                     | 0.193333797                                      |
| 152.3762811                                      | 143.3265007                                     | 0.168811532                                      |
| 76.42424242                                      | 46.625                                          | 0.253225037                                      |
| 80.85714286                                      | 28.8021978                                      | 0.297556759                                      |
| 412.5831178                                      | 2932.636129                                     | 0.046213522                                      |
| 53.23041475                                      | 15.92165899                                     | 0.410813453                                      |
| 163.1739691                                      | 148.375                                         | 0.172573173                                      |
| 43.98901099                                      | 11.98901099                                     | 0.460265622                                      |
| 174.9343908                                      | 336.0237924                                     | 0.07530204                                       |
| 286.0723153                                      | 818.5830542                                     | 0.07252704                                       |
| 120.2717272                                      | 81.0990099                                      | 0.23047259                                       |
| 179.3410959                                      | 394.3924658                                     | 0.089426266                                      |
| 38.78947368                                      | 7.165413534                                     | 0.51823726                                       |
| 79.88333333                                      | 118.28125                                       | 0.118106332                                      |
| 49.56291391                                      | 26.50993377                                     | 0.254666753                                      |
| 145.1363041                                      | 364.0825688                                     | 0.104212013                                      |
| 179.6988447                                      | 789.0636714                                     | 0.075271952                                      |
| 230.9359526                                      | 599.5026911                                     | 0.121008736                                      |
| 135.1500295                                      | 193.0437094                                     | 0.109906408                                      |
| 239.370388                                       | 628.2163771                                     | 0.077474404                                      |
| 395.3154081                                      | 1663.895279                                     | 0.075716338                                      |
| 174.4312455                                      | 110.37509                                       | 0.204686353                                      |
| 7.533333333                                      | 1.8                                             | 0.722222222                                      |
| 32.34513274                                      | 7.247787611                                     | 0.515843166                                      |
| 176.3238381                                      | 114.6386807                                     | 0.201495403                                      |
| 317.1832312                                      | 1344.350172                                     | 0.067272918                                      |
| 214.2269129                                      | 329.7697889                                     | 0.119400813                                      |
| 70.16510903                                      | 20.83800623                                     | 0.342362467                                      |
| 77.89013035                                      | 41.55865922                                     | 0.225712637                                      |
| 84.61118881                                      | 62.77622378                                     | 0.176144123                                      |
| 61.70866142                                      | 34.67979003                                     | 0.3063148                                        |
| 128.7791262                                      | 73.49271845                                     | 0.251932702                                      |
| 80.19362187                                      | 34.64009112                                     | 0.261735908                                      |
| 187.5363229                                      | 83.4896861                                      | 0.251914419                                      |
| 253.3956223                                      | 1549.681803                                     | 0.031750427                                      |
| 419.6416606                                      | 193.4333576                                     | 0.252572994                                      |
| 36.55263158                                      | 22.78070175                                     | 0.304194477                                      |
| 11.09090909                                      | 1.909090909                                     | 0.659090909                                      |
| 42.75342466                                      | 7.643835616                                     | 0.509623288                                      |
| 218.879902                                       | 650.5215686                                     | 0.087460199                                      |
| 61.16377171                                      | 44.10669975                                     | 0.229829455                                      |
| 304.0691706                                      | 291.7010955                                     | 0.150544053                                      |
| 41.10041841                                      | 19.82008368                                     | 0.202653513                                      |
| 461.6831771                                      | 2630.359278                                     | 0.05451487                                       |
| 63.50149254                                      | 24.36119403                                     | 0.330755944                                      |
| 180.2201835                                      | 60.5940367                                      | 0.370101745                                      |
| 117.1659389                                      | 24.63755459                                     | 0.420427376                                      |
| 59.86440678                                      | 27.85875706                                     | 0.265726934                                      |
| 63.60085837                                      | 42.30472103                                     | 0.133398961                                      |
| 173.2419244                                      | 136.395189                                      | 0.154846654                                      |
| 428.8084416                                      | 792.3367769                                     | 0.126319211                                      |
| 226.3004418                                      | 615.19784                                       | 0.081042298                                      |
| 133.5185185                                      | 230.5443322                                     | 0.099588579                                      |
| 11.26415094                                      | 5.075471698                                     | 0.382672956                                      |
| 152.1128472                                      | 90.67708333                                     | 0.228837273                                      |
| 29.72380952                                      | 7.19047619                                      | 0.436640212                                      |
| 264.4906259                                      | 336.7219498                                     | 0.135123333                                      |
| 24.06293706                                      | 16.31468531                                     | 0.295800539                                      |
| 162.1819196                                      | 171.3772321                                     | 0.147840639                                      |
| 246.1889188                                      | 241.4155444                                     | 0.142720765                                      |
| 88.61904762                                      | 52.64373898                                     | 0.211575287                                      |
| 341.7819187                                      | 1150.468329                                     | 0.068356315                                      |
| 472.6315304                                      | 2130.020306                                     | 0.052450819                                      |
| 596.5620911                                      | 3044.013844                                     | 0.068816515                                      |
| 85.05381166                                      | 33.05829596                                     | 0.341245224                                      |
| 69.37719298                                      | 44.50438596                                     | 0.272216692                                      |
| 31.52678571                                      | 29.05357143                                     | 0.249018854                                      |
| 126.2968237                                      | 77.19277108                                     | 0.224276009                                      |
| 192.0591716                                      | 319.8002959                                     | 0.137109588                                      |
| 31.93959732                                      | 13.2147651                                      | 0.331102028                                      |
| 138.583815                                       | 59.71213873                                     | 0.304006253                                      |
| 306.2854534                                      | 651.0600527                                     | 0.122249054                                      |
| 12.5483871                                       | 2.677419355                                     | 0.634408602                                      |
| 283.6509472                                      | 721.2938331                                     | 0.087849572                                      |
| 301.5086969                                      | 413.8873681                                     | 0.148202132                                      |
| 57.27945205                                      | 34.89589041                                     | 0.257760178                                      |
| 121.75382                                        | 37.88285229                                     | 0.349301788                                      |
| 11.12                                            | 6.36                                            | 0.378966667                                      |
| 7.461538462                                      | 2.076923077                                     | 0.769230769                                      |
| 256.8279382                                      | 378.117527                                      | 0.140171631                                      |
| 59.40789474                                      | 25.40789474                                     | 0.259421974                                      |
| 51.73557692                                      | 39.4375                                         | 0.223618893                                      |
| 242.771632                                       | 390.3159912                                     | 0.097533698                                      |
| 351.2927167                                      | 1212.287178                                     | 0.069745227                                      |
| 22.65079365                                      | 4.619047619                                     | 0.544863316                                      |
| 116.9705882                                      | 45.99117647                                     | 0.280307974                                      |
| 6                                                | 2.916666667                                     | 0.361550926                                      |
| 43.2208589                                       | 9.392638037                                     | 0.439110429                                      |
| 46.08571429                                      | 24.92142857                                     | 0.265215727                                      |

| log.sigma.3.5.mm.3D_gldm_DependenceNonUniformityNormalized | log.sigma.3.5.mm.3D_gldm_DependenceVariance | log.sigma.3.5.mm.3D_gldm_LargeDependenceEmphasis |
|------------------------------------------------------------|---------------------------------------------|--------------------------------------------------|
| 0.149607508                                                | 3.965316411                                 | 17.033241                                        |
| 0.084707497                                                | 31.72393745                                 | 79.47469708                                      |
| 0.196846372                                                | 2.19879345                                  | 11.61016949                                      |
| 0.122302247                                                | 20.07587551                                 | 42.55613037                                      |
| 0.294382904                                                | 1.175963141                                 | 5.792079208                                      |
| 0.143375437                                                | 5.16904058                                  | 19.26229508                                      |
| 0.236326531                                                | 1.354285714                                 | 8.114285714                                      |
| 0.188313506                                                | 2.890703416                                 | 11.24438903                                      |
| 0.210062903                                                | 2.117812736                                 | 9.594850949                                      |
| 0.084479582                                                | 21.73601616                                 | 62.42820181                                      |
| 0.164610684                                                | 3.268107741                                 | 14.56914894                                      |
| 0.131515804                                                | 4.75946734                                  | 22.01981506                                      |
| 0.111549254                                                | 8.862065343                                 | 31.77013177                                      |
| 0.144742883                                                | 5.423539371                                 | 19.28787879                                      |
| 0.222135008                                                | 1.96902548                                  | 9.576923077                                      |
| 0.038103354                                                | 55.32428722                                 | 238.5330624                                      |
| 0.24530145                                                 | 1.680944594                                 | 7.313364055                                      |
| 0.105137867                                                | 11.51741683                                 | 37.19201031                                      |
| 0.241697863                                                | 2.953024997                                 | 9.120879121                                      |
| 0.063062145                                                | 32.71400308                                 | 105.5104542                                      |
| 0.056368929                                                | 40.47343623                                 | 129.0855172                                      |
| 0.132312131                                                | 6.854251762                                 | 23.03960396                                      |
| 0.061418184                                                | 34.4361869                                  | 105.7808219                                      |
| 0.291650178                                                | 1.429249816                                 | 5.766917293                                      |
| 0.083211806                                                | 13.68218316                                 | 52.61458333                                      |
| 0.164115609                                                | 3.143634051                                 | 14.41721854                                      |
| 0.063405987                                                | 36.89218805                                 | 104.4276977                                      |
| 0.046135775                                                | 51.87299368                                 | 167.3127086                                      |
| 0.062146381                                                | 53.40116547                                 | 136.2621098                                      |
| 0.079828724                                                | 37.41594607                                 | 93.75014767                                      |
| 0.056979383                                                | 42.51040148                                 | 128.4068079                                      |
| 0.044754377                                                | 51.77138116                                 | 169.8896185                                      |
| 0.12558045                                                 | 19.22894428                                 | 42.46148308                                      |
| 0.502222222                                                | 0.648888889                                 | 3                                                |
| 0.286240113                                                | 1.588534733                                 | 6.061946903                                      |
| 0.13217679                                                 | 10.06767081                                 | 28.65967016                                      |
| 0.047404458                                                | 48.06291487                                 | 170.7919593                                      |
| 0.070655314                                                | 31.28799751                                 | 87.08377309                                      |
| 0.218582894                                                | 2.2604012                                   | 9.45482866                                       |
| 0.145046798                                                | 4.253217232                                 | 18.22160149                                      |
| 0.118337327                                                | 7.286059954                                 | 27.90909091                                      |
| 0.161964991                                                | 3.877653089                                 | 14.65879265                                      |
| 0.156285347                                                | 4.043595061                                 | 16.22572816                                      |
| 0.182673398                                                | 2.916153403                                 | 12.92710706                                      |
| 0.168194012                                                | 3.68424541                                  | 14.95336323                                      |
| 0.041390987                                                | 47.11960185                                 | 211.2290101                                      |
| 0.15281925                                                 | 4.398094772                                 | 16.95848507                                      |
| 0.16031856                                                 | 4.067174515                                 | 15.23684211                                      |
| 0.504132231                                                | 0.247933884                                 | 2.363636364                                      |
| 0.292831676                                                | 1.298367424                                 | 5.520547945                                      |
| 0.053647035                                                | 50.49005671                                 | 145.1705882                                      |
| 0.151771146                                                | 3.805109323                                 | 17.45657568                                      |
| 0.095170319                                                | 17.39719623                                 | 50.09984351                                      |
| 0.171968278                                                | 2.826140999                                 | 15.32635983                                      |
| 0.040835236                                                | 54.5901977                                  | 205.0419246                                      |
| 0.189556694                                                | 3.406674092                                 | 12.12238806                                      |
| 0.206674522                                                | 2.679272578                                 | 10.0412844                                       |
| 0.255820827                                                | 1.606929692                                 | 6.943231441                                      |
| 0.169108494                                                | 3.452711545                                 | 14.33898305                                      |
| 0.136482529                                                | 4.62432537                                  | 24.35622318                                      |
| 0.119066615                                                | 12.34070453                                 | 37.20343643                                      |
| 0.063283418                                                | 41.25414922                                 | 109.824085                                       |
| 0.055547482                                                | 37.74077794                                 | 120.5802651                                      |
| 0.074926217                                                | 28.69695836                                 | 82.42536476                                      |
| 0.21253115                                                 | 2.159487362                                 | 9.037735849                                      |
| 0.132042402                                                | 5.914339796                                 | 21.72048611                                      |
| 0.2830839                                                  | 0.960544218                                 | 5.552380952                                      |
| 0.076288037                                                | 37.16457291                                 | 90.51312374                                      |
| 0.168272287                                                | 5.614162062                                 | 17.30769231                                      |
| 0.090503303                                                | 17.31106505                                 | 51.6171875                                       |
| 0.094724478                                                | 16.94488794                                 | 49.91342824                                      |
| 0.156294617                                                | 3.422381481                                 | 16.99647266                                      |
| 0.048431617                                                | 49.52125642                                 | 161.5234519                                      |
| 0.043624841                                                | 49.6074978                                  | 184.9601255                                      |
| 0.041088373                                                | 52.41280365                                 | 188.6889593                                      |
| 0.190703614                                                | 3.680890426                                 | 12.52017937                                      |
| 0.152142967                                                | 5.812538473                                 | 18.84210526                                      |
| 0.140744579                                                | 4.480867347                                 | 18.8125                                          |
| 0.13833168                                                 | 5.329972684                                 | 20.47426068                                      |
| 0.0710278                                                  | 36.53436723                                 | 93.83210059                                      |
| 0.214359714                                                | 2.63843971                                  | 10.39597315                                      |
| 0.160212503                                                | 5.171137024                                 | 16.63699422                                      |
| 0.062139471                                                | 42.20221221                                 | 112.9375127                                      |
| 0.404786681                                                | 0.616024974                                 | 3.322580645                                      |
| 0.057164641                                                | 40.70787757                                 | 121.2297461                                      |
| 0.085973395                                                | 16.59326993                                 | 51.94268606                                      |
| 0.156930006                                                | 3.470339651                                 | 15.44383562                                      |
| 0.206712767                                                | 2.619345615                                 | 10.21222411                                      |
| 0.2224                                                     | 1.7664                                      | 8.32                                             |
| 0.573964497                                                | 0.213017751                                 | 1.923076923                                      |
| 0.074898786                                                | 38.69801492                                 | 94.33508311                                      |
| 0.195420706                                                | 2.038781163                                 | 11.19736842                                      |
| 0.124364368                                                | 8.141249075                                 | 26.40865385                                      |
| 0.06647635                                                 | 32.53352092                                 | 96.20098576                                      |
| 0.048642027                                                | 48.59974848                                 | 158.7654389                                      |
| 0.359536407                                                | 0.703451751                                 | 3.920634921                                      |
| 0.172015571                                                | 3.102802768                                 | 13.26764706                                      |
| 0.25                                                       | 1.743055556                                 | 8.416666667                                      |
| 0.265158644                                                | 1.341111822                                 | 6.300613497                                      |
| 0.164591837                                                | 4.161020408                                 | 16.01428571                                      |

|                                                              |                                                               |                                                               |
|--------------------------------------------------------------|---------------------------------------------------------------|---------------------------------------------------------------|
| log.sigma.3.5.mm.3D_gldm_LargeDependenceLowGrayLevelEmphasis | log.sigma.3.5.mm.3D_gldm_SmallDependenceHighGrayLevelEmphasis | log.sigma.3.5.mm.3D_gldm_LargeDependenceHighGrayLevelEmphasis |
| 0.176195475                                                  | 43.25871195                                                   | 2439.072022                                                   |
| 0.523525209                                                  | 14.47399719                                                   | 14277.85959                                                   |
| 0.791937634                                                  | 20.54518323                                                   | 475.0903955                                                   |
| 0.235068617                                                  | 57.34900315                                                   | 9474.512675                                                   |
| 0.321997776                                                  | 78.78206271                                                   | 582.7029703                                                   |
| 0.685509478                                                  | 19.06667386                                                   | 744.2745902                                                   |
| 0.587824458                                                  | 17.11240476                                                   | 310.1571429                                                   |
| 0.184702699                                                  | 60.0361375                                                    | 1014.117207                                                   |
| 0.072838695                                                  | 126.6701907                                                   | 3379.347561                                                   |
| 0.458252136                                                  | 20.06895651                                                   | 10300.26736                                                   |
| 0.255296171                                                  | 32.21642029                                                   | 1054.295213                                                   |
| 0.2585874                                                    | 26.75927915                                                   | 2738.2893                                                     |
| 0.6938444                                                    | 17.59019787                                                   | 2214.050512                                                   |
| 0.75366341                                                   | 29.22202394                                                   | 826.2746212                                                   |
| 0.313739337                                                  | 39.05998712                                                   | 556.9010989                                                   |
| 1.373859834                                                  | 8.051231335                                                   | 42356.67852                                                   |
| 0.41010416                                                   | 51.06045472                                                   | 383.6313364                                                   |
| 0.888624094                                                  | 17.77892522                                                   | 3201.036082                                                   |
| 1.067479915                                                  | 66.57463909                                                   | 330.3516484                                                   |
| 1.074680546                                                  | 7.109033241                                                   | 12963.18241                                                   |
| 0.854075786                                                  | 9.19187512                                                    | 20727.50522                                                   |
| 0.477139642                                                  | 28.25756403                                                   | 1744.273927                                                   |
| 0.630988197                                                  | 12.92640309                                                   | 19667.66678                                                   |
| 0.052319622                                                  | 144.4256767                                                   | 1839.789474                                                   |
| 0.584717145                                                  | 10.87926391                                                   | 5743.428125                                                   |
| 0.319033575                                                  | 24.34171619                                                   | 1263.692053                                                   |
| 1.041919895                                                  | 12.3652914                                                    | 11699.26824                                                   |
| 0.910938771                                                  | 9.994728147                                                   | 32224.77638                                                   |
| 0.676376879                                                  | 18.92423212                                                   | 29948.34957                                                   |
| 0.525838457                                                  | 14.11163686                                                   | 19540.04135                                                   |
| 0.856930859                                                  | 10.29262142                                                   | 20926.70555                                                   |
| 1.290228097                                                  | 10.21989721                                                   | 24146.11423                                                   |
| 0.395538353                                                  | 30.00974612                                                   | 7039.353492                                                   |
| 0.613997974                                                  | 83.05555556                                                   | 128                                                           |
| 0.093829655                                                  | 99.54349558                                                   | 850.2477876                                                   |
| 0.239332347                                                  | 32.75557684                                                   | 4953.029235                                                   |
| 1.011295178                                                  | 7.850701363                                                   | 30327.37797                                                   |
| 0.740657609                                                  | 17.28803408                                                   | 12116.50825                                                   |
| 0.260720924                                                  | 60.19859538                                                   | 880.4797508                                                   |
| 0.480011488                                                  | 23.45490449                                                   | 1804.106145                                                   |
| 0.203912888                                                  | 26.7460777                                                    | 5424.116084                                                   |
| 0.293606452                                                  | 46.26395142                                                   | 1192.251969                                                   |
| 0.246515876                                                  | 32.52258258                                                   | 1593.956311                                                   |
| 0.255719161                                                  | 38.34785638                                                   | 1045.230068                                                   |
| 0.182023799                                                  | 46.66845831                                                   | 1851.796413                                                   |
| 2.591737083                                                  | 1.649983369                                                   | 18643.46031                                                   |
| 0.263942147                                                  | 51.37922078                                                   | 1867.910051                                                   |
| 0.964306262                                                  | 24.40620734                                                   | 458.7412281                                                   |
| 0.390124069                                                  | 83.61363636                                                   | 233.9545455                                                   |
| 0.431807355                                                  | 114.8440221                                                   | 625.9109589                                                   |
| 0.949863857                                                  | 11.5381069                                                    | 23912.64338                                                   |
| 0.747054944                                                  | 19.00345116                                                   | 716.5632754                                                   |
| 0.259683064                                                  | 27.59330064                                                   | 11582.18592                                                   |
| 0.557791008                                                  | 19.91963043                                                   | 976.7238494                                                   |
| 1.71892076                                                   | 5.528685204                                                   | 25949.18388                                                   |
| 0.520897292                                                  | 38.87945612                                                   | 905.1164179                                                   |
| 0.112505603                                                  | 73.43895047                                                   | 1328.150229                                                   |
| 0.110533694                                                  | 101.6111639                                                   | 1105.78821                                                    |
| 0.199512636                                                  | 35.86244915                                                   | 1698.112994                                                   |
| 0.836626932                                                  | 11.77671975                                                   | 1390.066524                                                   |
| 0.543913537                                                  | 13.03719216                                                   | 4659.430241                                                   |
| 0.461045606                                                  | 30.08119186                                                   | 28228.97196                                                   |
| 1.270643746                                                  | 8.417354192                                                   | 12668.66716                                                   |
| 1.061372369                                                  | 6.904543214                                                   | 8134.314254                                                   |
| 0.392144357                                                  | 43.25228512                                                   | 561.0377358                                                   |
| 0.176045955                                                  | 44.77396525                                                   | 4035.715278                                                   |
| 0.220616871                                                  | 65.67632275                                                   | 549.8                                                         |
| 0.724737124                                                  | 16.84051428                                                   | 15683.08249                                                   |
| 0.935561769                                                  | 22.09933713                                                   | 451.3636364                                                   |
| 0.458802445                                                  | 17.11225691                                                   | 7671.880022                                                   |
| 0.316974065                                                  | 23.38343687                                                   | 10128.62409                                                   |
| 0.385426189                                                  | 21.75317549                                                   | 1317.340388                                                   |
| 1.167977632                                                  | 7.554241941                                                   | 24444.99617                                                   |
| 1.989446435                                                  | 3.673713081                                                   | 19154.87392                                                   |
| 1.068908504                                                  | 13.14344616                                                   | 34573.66423                                                   |
| 0.147396587                                                  | 65.03064616                                                   | 1461.73991                                                    |
| 0.283267856                                                  | 32.15222659                                                   | 1603.598684                                                   |
| 1.657800647                                                  | 14.64834087                                                   | 376.7232143                                                   |
| 0.187888227                                                  | 37.97277534                                                   | 3684.871851                                                   |
| 0.486451536                                                  | 23.19008975                                                   | 19777.902                                                     |
| 0.195313015                                                  | 53.99337078                                                   | 849.5503356                                                   |
| 0.101207365                                                  | 73.53025957                                                   | 3655.873988                                                   |
| 0.389529761                                                  | 32.2601142                                                    | 34204.43599                                                   |
| 0.086895598                                                  | 110.2043011                                                   | 334.1290323                                                   |
| 1.143835077                                                  | 9.23846985                                                    | 14646.9738                                                    |
| 0.536775161                                                  | 21.6743028                                                    | 5859.553179                                                   |
| 0.420942874                                                  | 24.70658863                                                   | 914.1561644                                                   |
| 0.166490231                                                  | 74.04427184                                                   | 1269.110357                                                   |
| 0.455461191                                                  | 22.16860556                                                   | 294.76                                                        |
| 0.118017019                                                  | 48.61538462                                                   | 152.4615385                                                   |
| 0.409186238                                                  | 26.522592                                                     | 24459.58151                                                   |
| 0.515713578                                                  | 21.74220807                                                   | 636.5460526                                                   |
| 0.43000117                                                   | 22.09078087                                                   | 2607.855769                                                   |
| 0.679306319                                                  | 11.05913122                                                   | 15902.29244                                                   |
| 1.436262913                                                  | 6.896939135                                                   | 19338.40487                                                   |
| 0.112395196                                                  | 93.92934303                                                   | 369.2539683                                                   |
| 0.197547787                                                  | 57.17995172                                                   | 1589.688235                                                   |
| 1.10422764                                                   | 25.83752315                                                   | 346.4583333                                                   |
| 0.072919502                                                  | 119.1204022                                                   | 1265.417178                                                   |
| 0.261317983                                                  | 30.84946182                                                   | 2136.235714                                                   |

| log.sigma.3.5.mm.3D_gldm_SmallDependenceLowGrayLevelEmphasis | log.sigma.3.5.mm.3D_gldm_LowGrayLevelEmphasis | log.sigma.3.5.mm.3D_gldm_DistanceZoneVariabilityNormalized |
|--------------------------------------------------------------|-----------------------------------------------|------------------------------------------------------------|
| 0.005034716                                                  | 0.01301867                                    | 0.979383681                                                |
| 0.002518536                                                  | 0.014166039                                   | 0.926035503                                                |
| 0.009630453                                                  | 0.065279312                                   | 1                                                          |
| 0.002966826                                                  | 0.009862152                                   | 0.89152436                                                 |
| 0.012828872                                                  | 0.04808617                                    | 0.964297521                                                |
| 0.010379715                                                  | 0.037615327                                   | 1                                                          |
| 0.018569823                                                  | 0.074840371                                   | 1                                                          |
| 0.007080656                                                  | 0.017838035                                   | 0.97515921                                                 |
| 0.002540427                                                  | 0.007373003                                   | 0.534545646                                                |
| 0.001665697                                                  | 0.011763396                                   | 0.939927754                                                |
| 0.006407933                                                  | 0.019786751                                   | 0.878798081                                                |
| 0.004407821                                                  | 0.015810201                                   | 0.973159332                                                |
| 0.005739983                                                  | 0.028750335                                   | 0.9504709                                                  |
| 0.009245126                                                  | 0.042197922                                   | 0.96162928                                                 |
| 0.008209225                                                  | 0.028671926                                   | 0.956226331                                                |
| 0.000470857                                                  | 0.007194599                                   | 0.959838315                                                |
| 0.011972634                                                  | 0.036447808                                   | 0.981310075                                                |
| 0.004818716                                                  | 0.033938253                                   | 0.902529796                                                |
| 0.021379743                                                  | 0.06666789                                    | 0.978949751                                                |
| 0.001682627                                                  | 0.016113183                                   | 0.918751148                                                |
| 0.001128384                                                  | 0.009677328                                   | 0.987786518                                                |
| 0.006788336                                                  | 0.025290679                                   | 0.941960698                                                |
| 0.001443416                                                  | 0.009395985                                   | 0.983674575                                                |
| 0.01358107                                                   | 0.017476241                                   | 1                                                          |
| 0.003457578                                                  | 0.017217914                                   | 1                                                          |
| 0.007392666                                                  | 0.028451015                                   | 0.955578512                                                |
| 0.001932264                                                  | 0.015339575                                   | 0.974506806                                                |
| 0.001158237                                                  | 0.008228183                                   | 0.948753463                                                |
| 0.002058556                                                  | 0.010251733                                   | 0.928675284                                                |
| 0.001867596                                                  | 0.011911593                                   | 0.934541093                                                |
| 0.001254445                                                  | 0.010860571                                   | 0.959631263                                                |
| 0.001280449                                                  | 0.012128329                                   | 0.952505605                                                |
| 0.004484323                                                  | 0.019649852                                   | 0.91185509                                                 |
| 0.042886863                                                  | 0.149997974                                   | 1                                                          |
| 0.018840654                                                  | 0.027428387                                   | 0.969704142                                                |
| 0.002913193                                                  | 0.011967621                                   | 0.890792402                                                |
| 0.001243697                                                  | 0.00932                                       | 0.901982386                                                |
| 0.001678299                                                  | 0.013229347                                   | 0.959787068                                                |
| 0.010914329                                                  | 0.02581431                                    | 0.92866941                                                 |
| 0.006422623                                                  | 0.029275681                                   | 0.898106509                                                |
| 0.003652584                                                  | 0.012251852                                   | 1                                                          |
| 0.005610175                                                  | 0.023110342                                   | 0.928157719                                                |
| 0.005155399                                                  | 0.018081019                                   | 0.949427765                                                |
| 0.007498711                                                  | 0.02314992                                    | 0.97091263                                                 |
| 0.003020643                                                  | 0.013524636                                   | 0.747471139                                                |
| 0.001403433                                                  | 0.01979336                                    | 0.967876264                                                |
| 0.003961475                                                  | 0.01679506                                    | 0.666730098                                                |
| 0.019298538                                                  | 0.062587336                                   | 0.875555556                                                |
| 0.03031182                                                   | 0.10227427                                    | 1                                                          |
| 0.010553906                                                  | 0.046287498                                   | 1                                                          |
| 0.001433399                                                  | 0.010815238                                   | 0.953649323                                                |
| 0.006844549                                                  | 0.039630711                                   | 0.7714                                                     |
| 0.001717065                                                  | 0.008097399                                   | 0.846518787                                                |
| 0.008300111                                                  | 0.03422832                                    | 1                                                          |
| 0.001292248                                                  | 0.012949243                                   | 0.928263142                                                |
| 0.016178876                                                  | 0.048373363                                   | 0.939907457                                                |
| 0.005868099                                                  | 0.013143131                                   | 0.98933364                                                 |
| 0.006460578                                                  | 0.01435279                                    | 0.940982987                                                |
| 0.007427358                                                  | 0.01938447                                    | 1                                                          |
| 0.008260696                                                  | 0.039891679                                   | 1                                                          |
| 0.00562235                                                   | 0.026712549                                   | 0.885384293                                                |
| 0.001010521                                                  | 0.006773086                                   | 0.918464791                                                |
| 0.001754053                                                  | 0.01492611                                    | 0.958658049                                                |
| 0.003498856                                                  | 0.02484135                                    | 0.987500494                                                |
| 0.024744162                                                  | 0.042465566                                   | 1                                                          |
| 0.002686012                                                  | 0.011731057                                   | 0.931122449                                                |
| 0.016664115                                                  | 0.034695834                                   | 0.966111772                                                |
| 0.002885649                                                  | 0.018177695                                   | 0.831345993                                                |
| 0.015107929                                                  | 0.049934226                                   | 0.9608                                                     |
| 0.004045223                                                  | 0.016948673                                   | 0.976565795                                                |
| 0.00153209                                                   | 0.0102054                                     | 0.984211526                                                |
| 0.005690331                                                  | 0.025432632                                   | 0.892656488                                                |
| 0.001134088                                                  | 0.012192578                                   | 0.942362445                                                |
| 0.002040237                                                  | 0.019560632                                   | 0.941808349                                                |
| 0.000662043                                                  | 0.007476199                                   | 0.938893969                                                |
| 0.006283027                                                  | 0.014346627                                   | 0.966860245                                                |
| 0.009352002                                                  | 0.02218398                                    | 0.985715025                                                |
| 0.0188012                                                    | 0.09537565                                    | 0.967222222                                                |
| 0.004694405                                                  | 0.016022                                      | 0.981736711                                                |
| 0.001802371                                                  | 0.008559343                                   | 0.967663727                                                |
| 0.009862503                                                  | 0.021610066                                   | 1                                                          |
| 0.004000703                                                  | 0.00910589                                    | 0.954139215                                                |
| 0.000941285                                                  | 0.005021195                                   | 0.840541845                                                |
| 0.039893428                                                  | 0.04556029                                    | 1                                                          |
| 0.002197331                                                  | 0.016239724                                   | 0.964881611                                                |
| 0.002312956                                                  | 0.012700202                                   | 0.988372491                                                |
| 0.008982897                                                  | 0.029734791                                   | 0.908468935                                                |
| 0.005490956                                                  | 0.014578825                                   | 0.944269014                                                |
| 0.032602554                                                  | 0.058405112                                   | 1                                                          |
| 0.097984968                                                  | 0.101991378                                   | 0.702479339                                                |
| 0.001657143                                                  | 0.008557774                                   | 0.878379272                                                |
| 0.011632998                                                  | 0.051341933                                   | 0.95654321                                                 |
| 0.009631325                                                  | 0.030258489                                   | 0.980954142                                                |
| 0.002719125                                                  | 0.013637484                                   | 0.946951926                                                |
| 0.001895254                                                  | 0.015799219                                   | 0.959115655                                                |
| 0.039131217                                                  | 0.049727649                                   | 1                                                          |
| 0.003443912                                                  | 0.015400308                                   | 0.857988166                                                |
| 0.032873592                                                  | 0.1415845                                     | 1                                                          |
| 0.008768512                                                  | 0.01382927                                    | 1                                                          |
| 0.013031254                                                  | 0.025060443                                   | 0.97727573                                                 |

| log.sigma.3.5.mm.3D_gldzm_LowIntensityEmphasis | log.sigma.3.5.mm.3D_gldzm_LargeDistanceEmphasis | log.sigma.3.5.mm.3D_gldzm_HighIntensitySmallDistanceEmphasis |
|------------------------------------------------|-------------------------------------------------|--------------------------------------------------------------|
| 0.020950036                                    | 1.03125                                         | 178.75                                                       |
| 0.030145602                                    | 1.115384615                                     | 113.4022436                                                  |
| 0.04738151                                     | 1                                               | 81.66666667                                                  |
| 0.012956474                                    | 1.182178218                                     | 229.6292079                                                  |
| 0.038933421                                    | 1.054545455                                     | 163.7318182                                                  |
| 0.040747117                                    | 1                                               | 79.65151515                                                  |
| 0.070813338                                    | 1                                               | 47.19354839                                                  |
| 0.020201719                                    | 1.037735849                                     | 166.4040881                                                  |
| 0.007790979                                    | 2.255136986                                     | 220.3639293                                                  |
| 0.016860903                                    | 1.126712329                                     | 156.9020167                                                  |
| 0.024517795                                    | 1.23853211                                      | 116.8305301                                                  |
| 0.024778529                                    | 1.040816327                                     | 139.6870748                                                  |
| 0.037219692                                    | 1.097046414                                     | 110.1413502                                                  |
| 0.043292173                                    | 1.090909091                                     | 113.1127345                                                  |
| 0.027425883                                    | 1.067164179                                     | 126.5690299                                                  |
| 0.012604757                                    | 1.061503417                                     | 176.6679954                                                  |
| 0.029443698                                    | 1.028301887                                     | 119.745283                                                   |
| 0.032635607                                    | 1.219607843                                     | 105.050354                                                   |
| 0.049154041                                    | 1.031914894                                     | 137.875                                                      |
| 0.026324514                                    | 1.127272727                                     | 97.98333333                                                  |
| 0.017952343                                    | 1.033742331                                     | 125.8735515                                                  |
| 0.029925188                                    | 1.08974359                                      | 123.5961538                                                  |
| 0.018841426                                    | 1.024691358                                     | 141.2355967                                                  |
| 0.023967904                                    | 1                                               | 282.3625                                                     |
| 0.033500856                                    | 1                                               | 88.66666667                                                  |
| 0.034038046                                    | 1.068181818                                     | 93.92045455                                                  |
| 0.020177729                                    | 1.060085837                                     | 122.5171674                                                  |
| 0.017292652                                    | 1.078947368                                     | 125.1381579                                                  |
| 0.019739366                                    | 1.147505423                                     | 151.8189323                                                  |
| 0.023826484                                    | 1.129213483                                     | 116.585362                                                   |
| 0.021147578                                    | 1.078767123                                     | 135.9949581                                                  |
| 0.019690969                                    | 1.151857835                                     | 140.5863512                                                  |
| 0.026987768                                    | 1.177631579                                     | 144.541324                                                   |
| 0.097497467                                    | 1                                               | 105.25                                                       |
| 0.035004715                                    | 1.046153846                                     | 190.4769231                                                  |
| 0.014978558                                    | 1.208633094                                     | 159.2244205                                                  |
| 0.021268683                                    | 1.15503876                                      | 111.3456072                                                  |
| 0.016654181                                    | 1.061583578                                     | 151.356305                                                   |
| 0.029911099                                    | 1.111111111                                     | 169.8185185                                                  |
| 0.034373681                                    | 1.161538462                                     | 99.59807692                                                  |
| 0.021754881                                    | 1                                               | 149.8848921                                                  |
| 0.022675937                                    | 1.111940299                                     | 144.4477612                                                  |
| 0.021856121                                    | 1.099137931                                     | 125.1023707                                                  |
| 0.029254867                                    | 1.080882353                                     | 142.3071895                                                  |
| 0.014170962                                    | 1.47284345                                      | 162.2456514                                                  |
| 0.063247619                                    | 1.089430894                                     | 48.75158085                                                  |
| 0.017629597                                    | 2.126614987                                     | 147.4403711                                                  |
| 0.068887892                                    | 1.2                                             | 79.20333333                                                  |
| 0.070269687                                    | 1                                               | 121.1764706                                                  |
| 0.025848819                                    | 1                                               | 212.1954023                                                  |
| 0.020281184                                    | 1.071216617                                     | 130.865727                                                   |
| 0.035365491                                    | 1.44                                            | 75.77027778                                                  |
| 0.012706555                                    | 1.306382979                                     | 165.6218824                                                  |
| 0.042593872                                    | 1                                               | 97.625                                                       |
| 0.028465566                                    | 1.174168297                                     | 100.5807241                                                  |
| 0.051293552                                    | 1.093023256                                     | 114.4844961                                                  |
| 0.015508754                                    | 1.016085791                                     | 195.3116622                                                  |
| 0.014433067                                    | 1.091304348                                     | 237.6913043                                                  |
| 0.027971601                                    | 1                                               | 133.6698113                                                  |
| 0.066900928                                    | 1                                               | 95.1969697                                                   |
| 0.047011597                                    | 1.183098592                                     | 78.72065728                                                  |
| 0.009356168                                    | 1.133333333                                     | 236.7014368                                                  |
| 0.02447973                                     | 1.080701754                                     | 106.1287524                                                  |
| 0.050190572                                    | 1.018867925                                     | 67.21540881                                                  |
| 0.057905733                                    | 1                                               | 109.12                                                       |
| 0.01468341                                     | 1.107142857                                     | 188.4508929                                                  |
| 0.036657218                                    | 1.051724138                                     | 140.6594828                                                  |
| 0.023217735                                    | 1.278911565                                     | 122.5793651                                                  |
| 0.051583149                                    | 1.06                                            | 72.945                                                       |
| 0.034482464                                    | 1.035573123                                     | 112.6057312                                                  |
| 0.013346762                                    | 1.023872679                                     | 163.2871353                                                  |
| 0.028494166                                    | 1.170731707                                     | 100.1910569                                                  |
| 0.020512267                                    | 1.101234568                                     | 111.2897805                                                  |
| 0.056464245                                    | 1.139908257                                     | 67.00447566                                                  |
| 0.010490672                                    | 1.138678223                                     | 202.1397692                                                  |
| 0.018036872                                    | 1.050561798                                     | 184.4676966                                                  |
| 0.034266164                                    | 1.021582734                                     | 117.0791367                                                  |
| 0.093804059                                    | 1.05                                            | 58.55                                                        |
| 0.023427027                                    | 1.02764977                                      | 161.8179724                                                  |
| 0.014304061                                    | 1.049315068                                     | 167.3260274                                                  |
| 0.027052031                                    | 1                                               | 156.9344262                                                  |
| 0.012839901                                    | 1.086956522                                     | 235.3063917                                                  |
| 0.008124839                                    | 1.277504105                                     | 252.2872651                                                  |
| 0.055896034                                    | 1                                               | 163.826087                                                   |
| 0.028675628                                    | 1.114503817                                     | 108.2910305                                                  |
| 0.016513691                                    | 1.01754386                                      | 150.4922027                                                  |
| 0.034668491                                    | 1.144230769                                     | 93.92788462                                                  |
| 0.014819973                                    | 1.086065574                                     | 206.4518443                                                  |
| 0.081175275                                    | 1                                               | 54.86363636                                                  |
| 0.1173787                                      | 1.545454545                                     | 64.95454545                                                  |
| 0.014094843                                    | 1.195121951                                     | 180.9034553                                                  |
| 0.056078912                                    | 1.066666667                                     | 82.08888889                                                  |
| 0.048078937                                    | 1.028846154                                     | 97.01201923                                                  |
| 0.033881352                                    | 1.096676737                                     | 108.6418261                                                  |
| 0.035399539                                    | 1.090277778                                     | 99.39409722                                                  |
| 0.065526173                                    | 1                                               | 160.325                                                      |
| 0.015204767                                    | 1.230769231                                     | 199.2884615                                                  |
| 0.12597276                                     | 1                                               | 65.5                                                         |
| 0.017970192                                    | 1                                               | 265.1818182                                                  |
| 0.046432818                                    | 1.034482759                                     | 114.908046                                                   |

| log.sigma.3.5.mm.3D_gldzm_LowIntensityLargeDistanceEmphasis | log.sigma.3.5.mm.3D_gldzm_HighIntensityEmphasis | log.sigma.3.5.mm.3D_gldzm_DistanceZoneVariability | log.sigma.3.5.mm.3D_gldzm_ZonePercentage |
|-------------------------------------------------------------|-------------------------------------------------|---------------------------------------------------|------------------------------------------|
| 0.02116705                                                  | 179.875                                         | 94.02083333                                       | 0.265927978                              |
| 0.031428703                                                 | 117.0128205                                     | 144.4615385                                       | 0.111190306                              |
| 0.04738151                                                  | 81.66666667                                     | 54                                                | 0.305084746                              |
| 0.020139261                                                 | 233.0534653                                     | 450.219802                                        | 0.26125194                               |
| 0.044994027                                                 | 163.8545455                                     | 53.03636364                                       | 0.544554455                              |
| 0.040747117                                                 | 79.65151515                                     | 66                                                | 0.270491803                              |
| 0.070813338                                                 | 47.19354839                                     | 31                                                | 0.442857143                              |
| 0.020409629                                                 | 168.1257862                                     | 155.0503145                                       | 0.396508728                              |
| 0.011083913                                                 | 379.9075342                                     | 312.1746575                                       | 0.395663957                              |
| 0.018049248                                                 | 162.6883562                                     | 274.4589041                                       | 0.125916343                              |
| 0.029183765                                                 | 121.3944954                                     | 95.78899083                                       | 0.289893617                              |
| 0.0256643                                                   | 140.1972789                                     | 143.0544218                                       | 0.194187583                              |
| 0.043047465                                                 | 111.4725738                                     | 225.2616034                                       | 0.173499268                              |
| 0.064509705                                                 | 113.7727273                                     | 148.0909091                                       | 0.291666667                              |
| 0.041107475                                                 | 126.6641791                                     | 128.1343284                                       | 0.368131868                              |
| 0.014183696                                                 | 177.9476082                                     | 421.3690205                                       | 0.040543037                              |
| 0.03651917                                                  | 119.7735849                                     | 104.0188679                                       | 0.488479263                              |
| 0.046879996                                                 | 108.3843137                                     | 230.145098                                        | 0.164304124                              |
| 0.081068935                                                 | 137.8829787                                     | 92.0212766                                        | 0.516483516                              |
| 0.048417513                                                 | 99.31515152                                     | 151.5939394                                       | 0.059480894                              |
| 0.018169571                                                 | 126.6380368                                     | 322.0184049                                       | 0.064236453                              |
| 0.038216458                                                 | 124.3076923                                     | 220.4188034                                       | 0.257425743                              |
| 0.019286279                                                 | 141.5843621                                     | 239.0329218                                       | 0.083219178                              |
| 0.023967904                                                 | 282.3625                                        | 80                                                | 0.601503759                              |
| 0.033500856                                                 | 88.66666667                                     | 117                                               | 0.121875                                 |
| 0.036701398                                                 | 94.60227273                                     | 84.09090909                                       | 0.291390728                              |
| 0.020941258                                                 | 123.3819742                                     | 227.0600858                                       | 0.101791175                              |
| 0.018066897                                                 | 127.5037594                                     | 252.3684211                                       | 0.068292683                              |
| 0.021211869                                                 | 155.35141                                       | 428.1193059                                       | 0.124058127                              |
| 0.024829519                                                 | 120.3033708                                     | 166.3483146                                       | 0.105138807                              |
| 0.023526149                                                 | 137.2568493                                     | 280.2123288                                       | 0.06950726                               |
| 0.021852273                                                 | 142.0226171                                     | 589.6009693                                       | 0.070078116                              |
| 0.030857404                                                 | 147.6480263                                     | 277.2039474                                       | 0.218862491                              |
| 0.097497467                                                 | 105.25                                          | 12                                                | 0.8                                      |
| 0.046543176                                                 | 190.5230769                                     | 63.03076923                                       | 0.575221239                              |
| 0.016944593                                                 | 166.3273381                                     | 247.6402878                                       | 0.208395802                              |
| 0.023596774                                                 | 114.4909561                                     | 349.0671835                                       | 0.057838888                              |
| 0.018840891                                                 | 152.3636364                                     | 327.28739                                         | 0.112467018                              |
| 0.035352457                                                 | 170.8074074                                     | 125.3703704                                       | 0.420560748                              |
| 0.036670689                                                 | 102.4769231                                     | 116.7538462                                       | 0.242085661                              |
| 0.021754881                                                 | 149.8848921                                     | 139                                               | 0.194405594                              |
| 0.026623364                                                 | 146.8432836                                     | 124.3731343                                       | 0.351706037                              |
| 0.02258208                                                  | 128.3146552                                     | 220.2672414                                       | 0.281553398                              |
| 0.029756121                                                 | 144.2058824                                     | 132.0441176                                       | 0.309794989                              |
| 0.019012914                                                 | 189.543131                                      | 233.9584665                                       | 0.280717489                              |
| 0.064462652                                                 | 49.84552846                                     | 119.0487805                                       | 0.020091473                              |
| 0.025512826                                                 | 209.497416                                      | 516.0490956                                       | 0.28186453                               |
| 0.121024003                                                 | 81.25333333                                     | 65.66666667                                       | 0.328947368                              |
| 0.070269687                                                 | 121.1764706                                     | 17                                                | 0.772727273                              |
| 0.025848819                                                 | 212.1954023                                     | 87                                                | 0.595890411                              |
| 0.021921421                                                 | 132.7329377                                     | 321.379822                                        | 0.082598039                              |
| 0.039733131                                                 | 86.61                                           | 77.14                                             | 0.248138958                              |
| 0.016440421                                                 | 176.006383                                      | 397.8638298                                       | 0.147104851                              |
| 0.042593872                                                 | 97.625                                          | 56                                                | 0.234309623                              |
| 0.032134325                                                 | 102.4794521                                     | 474.3424658                                       | 0.04519724                               |
| 0.081939546                                                 | 114.8682171                                     | 121.248062                                        | 0.385074627                              |
| 0.015704313                                                 | 195.924933                                      | 369.0214477                                       | 0.427752294                              |
| 0.033119848                                                 | 238.9043478                                     | 216.426087                                        | 0.502183406                              |
| 0.027971601                                                 | 133.6698113                                     | 106                                               | 0.299435028                              |
| 0.066900928                                                 | 95.1969697                                      | 66                                                | 0.141630901                              |
| 0.050407643                                                 | 83.19248826                                     | 188.5868545                                       | 0.146391753                              |
| 0.014808685                                                 | 240.408046                                      | 799.0643678                                       | 0.128394333                              |
| 0.025901611                                                 | 107.477193                                      | 273.2175439                                       | 0.069955817                              |
| 0.050575632                                                 | 67.44654088                                     | 157.0125786                                       | 0.089225589                              |
| 0.057905733                                                 | 109.12                                          | 25                                                | 0.471698113                              |
| 0.017867781                                                 | 190.4678571                                     | 260.7142857                                       | 0.243055556                              |
| 0.088381355                                                 | 140.6724138                                     | 56.03448276                                       | 0.552380952                              |
| 0.026708974                                                 | 128.9773243                                     | 366.6235828                                       | 0.127199308                              |
| 0.052807639                                                 | 73.68                                           | 48.04                                             | 0.34965035                               |
| 0.035452307                                                 | 113.3201581                                     | 247.0711462                                       | 0.141183036                              |
| 0.013528685                                                 | 164.1087533                                     | 371.0477454                                       | 0.145055791                              |
| 0.053979729                                                 | 105.398374                                      | 109.796748                                        | 0.216931217                              |
| 0.022042725                                                 | 112.9407407                                     | 381.6567901                                       | 0.057389826                              |
| 0.060211621                                                 | 68.5733945                                      | 410.6284404                                       | 0.040243677                              |
| 0.01293199                                                  | 204.6966414                                     | 866.5991333                                       | 0.063571871                              |
| 0.01927596                                                  | 186.0730337                                     | 172.1011236                                       | 0.399103139                              |
| 0.035615085                                                 | 117.1654676                                     | 137.0143885                                       | 0.304824561                              |
| 0.094585309                                                 | 59.35                                           | 58.03333333                                       | 0.267857143                              |
| 0.02358912                                                  | 163.235023                                      | 213.0368664                                       | 0.237677985                              |
| 0.014875334                                                 | 168.6164384                                     | 353.1972603                                       | 0.134985207                              |
| 0.027052031                                                 | 156.9344262                                     | 61                                                | 0.409395973                              |
| 0.013449925                                                 | 238.5317726                                     | 285.2876254                                       | 0.34566474                               |
| 0.015548853                                                 | 263.2151067                                     | 511.8899836                                       | 0.123554474                              |
| 0.055896034                                                 | 163.826087                                      | 23                                                | 0.741935484                              |
| 0.029852976                                                 | 109.6259542                                     | 379.1984733                                       | 0.079201935                              |
| 0.016896792                                                 | 150.8869396                                     | 507.0350877                                       | 0.146278871                              |
| 0.042777897                                                 | 97.80769231                                     | 94.48076923                                       | 0.284931507                              |
| 0.016168536                                                 | 209.5409836                                     | 230.4016393                                       | 0.41426146                               |
| 0.081175275                                                 | 54.86363636                                     | 22                                                | 0.44                                     |
| 0.420409003                                                 | 65.63636364                                     | 7.727272727                                       | 0.846153846                              |
| 0.015743475                                                 | 188.1686992                                     | 432.1626016                                       | 0.143482065                              |
| 0.056933079                                                 | 83.45555556                                     | 86.08888889                                       | 0.296052632                              |
| 0.051284066                                                 | 97.07692308                                     | 102.0192308                                       | 0.25                                     |
| 0.035102334                                                 | 110.3897281                                     | 313.4410876                                       | 0.090635268                              |
| 0.036524882                                                 | 100.8333333                                     | 414.337963                                        | 0.059817225                              |
| 0.065526173                                                 | 160.325                                         | 40                                                | 0.634920635                              |
| 0.039724239                                                 | 203.1945701                                     | 189.6153846                                       | 0.325                                    |
| 0.12597276                                                  | 65.5                                            | 12                                                | 0.5                                      |
| 0.017970192                                                 | 265.1818182                                     | 88                                                | 0.539877301                              |
| 0.047390673                                                 | 115.2183908                                     | 85.02298851                                       | 0.310714286                              |

| log.sigma.3.5.mm.3D_gldzm_IntensityVariabilityNormalized | log.sigma.3.5.mm.3D_gldzm_LowIntensitySmallDistanceEmphasis | log.sigma.3.5.mm.3D_gldzm_IntensityVariability |
|----------------------------------------------------------|-------------------------------------------------------------|------------------------------------------------|
| 0.071614583                                              | 0.020895782                                                 | 6.875                                          |
| 0.074375411                                              | 0.029824826                                                 | 11.6025641                                     |
| 0.086419753                                              | 0.04738151                                                  | 4.666666667                                    |
| 0.053465347                                              | 0.011170556                                                 | 27                                             |
| 0.057190083                                              | 0.03741827                                                  | 3.145454545                                    |
| 0.116161616                                              | 0.040747117                                                 | 7.666666667                                    |
| 0.123829344                                              | 0.070813338                                                 | 3.838709677                                    |
| 0.06617618                                               | 0.020149742                                                 | 10.52201258                                    |
| 0.039606399                                              | 0.007063661                                                 | 23.13013699                                    |
| 0.069290674                                              | 0.016593545                                                 | 20.23287671                                    |
| 0.090817271                                              | 0.02341162                                                  | 9.899082569                                    |
| 0.064926651                                              | 0.024557086                                                 | 9.544217687                                    |
| 0.076821734                                              | 0.035795306                                                 | 18.20675105                                    |
| 0.07201889                                               | 0.03805994                                                  | 11.09090909                                    |
| 0.072844732                                              | 0.024005485                                                 | 9.76119403                                     |
| 0.083763575                                              | 0.012210022                                                 | 36.77220957                                    |
| 0.077785689                                              | 0.02767483                                                  | 8.245283019                                    |
| 0.080199923                                              | 0.029165555                                                 | 20.45098039                                    |
| 0.059302852                                              | 0.041175318                                                 | 5.574468085                                    |
| 0.091864096                                              | 0.020801264                                                 | 15.15757576                                    |
| 0.080112161                                              | 0.017915426                                                 | 26.11656442                                    |
| 0.065782745                                              | 0.02785237                                                  | 15.39316239                                    |
| 0.072126539                                              | 0.018730212                                                 | 17.52674897                                    |
| 0.049375                                                 | 0.023967904                                                 | 3.95                                           |
| 0.084958726                                              | 0.033500856                                                 | 9.94017094                                     |
| 0.087551653                                              | 0.033372208                                                 | 7.704545455                                    |
| 0.089612997                                              | 0.020019414                                                 | 20.87982833                                    |
| 0.083469953                                              | 0.017099091                                                 | 22.20300752                                    |
| 0.065871137                                              | 0.019407369                                                 | 30.36659436                                    |
| 0.069561924                                              | 0.023600109                                                 | 12.38202247                                    |
| 0.075647401                                              | 0.02057235                                                  | 22.0890411                                     |
| 0.076236882                                              | 0.019302659                                                 | 47.19063005                                    |
| 0.062370152                                              | 0.026061478                                                 | 18.96052632                                    |
| 0.111111111                                              | 0.097497467                                                 | 1.333333333                                    |
| 0.05704142                                               | 0.032120099                                                 | 3.707692308                                    |
| 0.082759692                                              | 0.014524529                                                 | 23.00719424                                    |
| 0.081532226                                              | 0.020686661                                                 | 31.55297158                                    |
| 0.075979739                                              | 0.016107503                                                 | 25.90909091                                    |
| 0.064910837                                              | 0.028550759                                                 | 8.762962963                                    |
| 0.076923077                                              | 0.033799429                                                 | 10                                             |
| 0.069613374                                              | 0.021754881                                                 | 9.676258993                                    |
| 0.071508131                                              | 0.02168908                                                  | 9.582089552                                    |
| 0.074576397                                              | 0.021695917                                                 | 17.30172414                                    |
| 0.064554498                                              | 0.029177896                                                 | 8.779411765                                    |
| 0.062683094                                              | 0.012991312                                                 | 19.61980831                                    |
| 0.100535396                                              | 0.063018518                                                 | 12.36585366                                    |
| 0.055211693                                              | 0.016076217                                                 | 42.73385013                                    |
| 0.095466667                                              | 0.055853864                                                 | 7.16                                           |
| 0.08650519                                               | 0.070269687                                                 | 1.470588235                                    |
| 0.052715022                                              | 0.025848819                                                 | 4.586206897                                    |
| 0.070679499                                              | 0.019871125                                                 | 23.8189911                                     |
| 0.1028                                                   | 0.034330271                                                 | 10.28                                          |
| 0.06753282                                               | 0.011814933                                                 | 31.74042553                                    |
| 0.086734694                                              | 0.042593872                                                 | 4.857142857                                    |
| 0.083260251                                              | 0.027654075                                                 | 42.54598826                                    |
| 0.062916892                                              | 0.043632053                                                 | 8.11627907                                     |
| 0.060814065                                              | 0.015459865                                                 | 22.68364611                                    |
| 0.0536862                                                | 0.009761371                                                 | 12.34782609                                    |
| 0.062833749                                              | 0.027971601                                                 | 6.660377358                                    |
| 0.081726354                                              | 0.066900928                                                 | 5.393939394                                    |
| 0.082104521                                              | 0.046162585                                                 | 17.48826291                                    |
| 0.055042938                                              | 0.008001908                                                 | 47.88735632                                    |
| 0.089418283                                              | 0.02415648                                                  | 25.48421053                                    |
| 0.107313793                                              | 0.050094307                                                 | 17.06289308                                    |
| 0.0944                                                   | 0.057905733                                                 | 2.36                                           |
| 0.064005102                                              | 0.013887317                                                 | 17.92142857                                    |
| 0.063020214                                              | 0.023726183                                                 | 3.655172414                                    |
| 0.071456852                                              | 0.022344926                                                 | 31.51247166                                    |
| 0.1096                                                   | 0.051277027                                                 | 5.48                                           |
| 0.071943008                                              | 0.034240003                                                 | 18.20158103                                    |
| 0.073503648                                              | 0.013301282                                                 | 27.71087533                                    |
| 0.084539626                                              | 0.022122775                                                 | 10.39837398                                    |
| 0.086127115                                              | 0.020157087                                                 | 34.88148148                                    |
| 0.087471593                                              | 0.055622836                                                 | 38.13761468                                    |
| 0.069060919                                              | 0.009946155                                                 | 63.7432286                                     |
| 0.059335942                                              | 0.0177271                                                   | 10.56179775                                    |
| 0.074064489                                              | 0.033928934                                                 | 10.29496403                                    |
| 0.092222222                                              | 0.093608747                                                 | 5.533333333                                    |
| 0.062838455                                              | 0.023386504                                                 | 13.6359447                                     |
| 0.067412272                                              | 0.014161243                                                 | 24.60547945                                    |
| 0.080892233                                              | 0.027052031                                                 | 4.93442623                                     |
| 0.052426707                                              | 0.012697689                                                 | 15.67558528                                    |
| 0.061472548                                              | 0.006281593                                                 | 37.43678161                                    |
| 0.088846881                                              | 0.055896034                                                 | 2.043478261                                    |
| 0.080887542                                              | 0.028465983                                                 | 31.78880407                                    |
| 0.080028423                                              | 0.016417916                                                 | 41.0545809                                     |
| 0.082285503                                              | 0.03264114                                                  | 8.557692308                                    |
| 0.061072292                                              | 0.014482833                                                 | 14.90163934                                    |
| 0.107438017                                              | 0.081175275                                                 | 2.363636364                                    |
| 0.140495868                                              | 0.041621124                                                 | 1.545454545                                    |
| 0.066957499                                              | 0.013682685                                                 | 32.94308943                                    |
| 0.072839506                                              | 0.05586537                                                  | 6.555555556                                    |
| 0.073409763                                              | 0.047277655                                                 | 7.634615385                                    |
| 0.078905815                                              | 0.033603849                                                 | 26.11782477                                    |
| 0.070719736                                              | 0.035163415                                                 | 30.55092593                                    |
| 0.07125                                                  | 0.065526173                                                 | 2.85                                           |
| 0.063819332                                              | 0.009074899                                                 | 14.1040724                                     |
| 0.097222222                                              | 0.12597276                                                  | 1.166666667                                    |
| 0.059659091                                              | 0.017970192                                                 | 5.25                                           |
| 0.067776457                                              | 0.046193355                                                 | 5.896551724                                    |

| log.sigma.3.5.mm.3D_gldzm_HighIntensityLargeDistanceEmphasis | log.sigma.3.5.mm.3D_gldzm_SmallDistanceEmphasis | log.sigma.3.5.mm.3D_gldzm_SumVariance | log.sigma.3.5.mm.3D_gldzm_Homogeneity1 |
|--------------------------------------------------------------|-------------------------------------------------|---------------------------------------|----------------------------------------|
| 184.375                                                      | 0.9921875                                       | 402.4437734                           | 0.418334403                            |
| 131.4551282                                                  | 0.971153846                                     | 359.1371521                           | 0.546324765                            |
| 81.66666667                                                  | 1                                               | 95.55737059                           | 0.411609444                            |
| 248.7306931                                                  | 0.956655666                                     | 479.5031226                           | 0.428824947                            |
| 164.3454545                                                  | 0.986363636                                     | 264.6784597                           | 0.288084603                            |
| 79.65151515                                                  | 1                                               | 91.20863531                           | 0.437054127                            |
| 47.19354839                                                  | 1                                               | 69.71183391                           | 0.412686145                            |
| 175.0125786                                                  | 0.990566038                                     | 261.0871892                           | 0.359644736                            |
| 1212.619863                                                  | 0.750130803                                     | 1205.8077707                          | 0.290305123                            |
| 193.6267123                                                  | 0.975932268                                     | 382.9930083                           | 0.533100992                            |
| 146.5412844                                                  | 0.950560652                                     | 185.5414144                           | 0.403058774                            |
| 142.2380952                                                  | 0.989795918                                     | 308.7781586                           | 0.450319702                            |
| 119.4978903                                                  | 0.980426629                                     | 140.7599688                           | 0.463443078                            |
| 119.2987013                                                  | 0.984487734                                     | 123.1180979                           | 0.413625239                            |
| 127.0447761                                                  | 0.983208955                                     | 162.9870965                           | 0.357467281                            |
| 183.0660592                                                  | 0.984624146                                     | 521.2321984                           | 0.743472183                            |
| 119.8867925                                                  | 0.992924528                                     | 154.2316105                           | 0.325417289                            |
| 132.1215686                                                  | 0.960484749                                     | 153.2199907                           | 0.471515615                            |
| 137.9148936                                                  | 0.992021277                                     | 139.2617272                           | 0.326100732                            |
| 104.6424242                                                  | 0.968181818                                     | 252.1044638                           | 0.605527992                            |
| 132.3680982                                                  | 0.994972733                                     | 380.7240907                           | 0.635519469                            |
| 127.1538462                                                  | 0.977564103                                     | 183.7170338                           | 0.426713513                            |
| 142.9794239                                                  | 0.99382716                                      | 429.8656507                           | 0.611931605                            |
| 282.3625                                                     | 1                                               | 845.8941531                           | 0.309616583                            |
| 88.66666667                                                  | 1                                               | 241.7316865                           | 0.568178265                            |
| 97.32954545                                                  | 0.982954545                                     | 189.5976903                           | 0.410639269                            |
| 129.5879828                                                  | 0.989747258                                     | 253.7372989                           | 0.60079615                             |
| 136.9661654                                                  | 0.980263158                                     | 488.544258                            | 0.679067726                            |
| 177.6182213                                                  | 0.971634731                                     | 496.8768134                           | 0.600684444                            |
| 141.5674157                                                  | 0.973938826                                     | 433.1033514                           | 0.567969454                            |
| 145.2876712                                                  | 0.984113394                                     | 374.663888                            | 0.623801509                            |
| 157.2617124                                                  | 0.980939239                                     | 344.1883975                           | 0.663461147                            |
| 168.4013158                                                  | 0.96484375                                      | 293.9117242                           | 0.442519197                            |
| 105.25                                                       | 1                                               | 210.1461008                           | 0.267434522                            |
| 190.7076923                                                  | 0.988461538                                     | 349.8345008                           | 0.297245311                            |
| 202.0611511                                                  | 0.955835332                                     | 335.9713738                           | 0.429118102                            |
| 127.0723514                                                  | 0.96124031                                      | 441.9978169                           | 0.670956042                            |
| 156.3929619                                                  | 0.984604106                                     | 296.924402                            | 0.557704238                            |
| 174.762963                                                   | 0.972222222                                     | 279.2789703                           | 0.343619775                            |
| 113.9923077                                                  | 0.959615385                                     | 205.143226                            | 0.416513487                            |
| 149.8848921                                                  | 1                                               | 430.5298226                           | 0.480182022                            |
| 156.4253731                                                  | 0.972014925                                     | 224.0888246                           | 0.393214156                            |
| 145.4741379                                                  | 0.980004789                                     | 238.0481576                           | 0.396052813                            |
| 157.3235294                                                  | 0.987949346                                     | 214.6324428                           | 0.380709366                            |
| 306.2587859                                                  | 0.888888889                                     | 380.6240514                           | 0.371525752                            |
| 58.59349593                                                  | 0.9866757                                       | 209.0761721                           | 0.739093202                            |
| 738.9870801                                                  | 0.84157874                                      | 383.488277                            | 0.372686504                            |
| 89.45333333                                                  | 0.95                                            | 79.55638282                           | 0.397323388                            |
| 121.1764706                                                  | 1                                               | 259.1687089                           | 0.256768122                            |
| 212.1954023                                                  | 1                                               | 315.0509363                           | 0.266781578                            |
| 140.2017804                                                  | 0.982195846                                     | 380.2907458                           | 0.629962274                            |
| 138.68                                                       | 0.901111111                                     | 114.0816502                           | 0.403107514                            |
| 234.8851064                                                  | 0.936480496                                     | 517.7846185                           | 0.491562564                            |
| 97.625                                                       | 1                                               | 158.1203563                           | 0.426849139                            |
| 118.8414873                                                  | 0.971678626                                     | 325.137739                            | 0.703611182                            |
| 116.4031008                                                  | 0.976744186                                     | 166.919139                            | 0.357390529                            |
| 198.3780161                                                  | 0.995978552                                     | 399.5360085                           | 0.344259105                            |
| 243.7565217                                                  | 0.977173913                                     | 460.4595747                           | 0.289716858                            |
| 133.6698113                                                  | 1                                               | 267.6334493                           | 0.405381186                            |
| 95.1969697                                                   | 1                                               | 141.6677407                           | 0.467873662                            |
| 101.0798122                                                  | 0.954225352                                     | 196.8770663                           | 0.467169423                            |
| 255.9701149                                                  | 0.967943806                                     | 616.1321261                           | 0.56546047                             |
| 114.7578947                                                  | 0.983723197                                     | 246.6623888                           | 0.624123534                            |
| 68.37106918                                                  | 0.995283019                                     | 189.9191421                           | 0.575788632                            |
| 109.12                                                       | 1                                               | 193.2516063                           | 0.339804173                            |
| 198.5357143                                                  | 0.973214286                                     | 411.0874748                           | 0.421196999                            |
| 140.7241379                                                  | 0.987068966                                     | 223.6828676                           | 0.299133793                            |
| 154.569161                                                   | 0.930272109                                     | 321.0708424                           | 0.53546478                             |
| 76.62                                                        | 0.985                                           | 77.65989786                           | 0.413810362                            |
| 116.1778656                                                  | 0.991106719                                     | 296.1772374                           | 0.508739415                            |
| 167.3952255                                                  | 0.99403183                                      | 429.3761773                           | 0.505475266                            |
| 126.2276423                                                  | 0.957317073                                     | 177.7221322                           | 0.413671539                            |
| 120.6419753                                                  | 0.977434842                                     | 341.6091525                           | 0.652772929                            |
| 80.43807339                                                  | 0.976570464                                     | 234.6091078                           | 0.689307942                            |
| 221.75948                                                    | 0.975675635                                     | 495.7891809                           | 0.675357226                            |
| 192.494382                                                   | 0.987359551                                     | 347.9659771                           | 0.356936812                            |
| 117.5107914                                                  | 0.994604317                                     | 215.4660556                           | 0.411797554                            |
| 62.55                                                        | 0.9875                                          | 47.48634079                           | 0.442422621                            |
| 168.9032258                                                  | 0.993087558                                     | 426.9854126                           | 0.420294986                            |
| 173.7780822                                                  | 0.987671233                                     | 471.6569389                           | 0.562928526                            |
| 156.9344262                                                  | 1                                               | 245.9459482                           | 0.354348139                            |
| 256.7993311                                                  | 0.98197696                                      | 561.9942773                           | 0.385311868                            |
| 311.1592775                                                  | 0.934272943                                     | 790.7700152                           | 0.574784799                            |
| 163.826087                                                   | 1                                               | 338.6960457                           | 0.263034647                            |
| 124.6412214                                                  | 0.985687023                                     | 255.1888292                           | 0.611451657                            |
| 152.4658869                                                  | 0.995614035                                     | 276.4061933                           | 0.520794496                            |
| 113.3269231                                                  | 0.963942308                                     | 146.3051304                           | 0.411037226                            |
| 221.897541                                                   | 0.978483607                                     | 384.2662221                           | 0.330913787                            |
| 54.86363636                                                  | 1                                               | 86.34633395                           | 0.386864217                            |
| 68.36363636                                                  | 0.863636364                                     | 133.5481113                           | 0.287019429                            |
| 217.2296748                                                  | 0.951219512                                     | 575.2288815                           | 0.548270193                            |
| 88.92222222                                                  | 0.983333333                                     | 135.8540748                           | 0.381984956                            |
| 97.33653846                                                  | 0.992788462                                     | 185.9847242                           | 0.45106786                             |
| 119.0060423                                                  | 0.979187647                                     | 339.5636254                           | 0.579792918                            |
| 110.3402778                                                  | 0.983940972                                     | 274.8895831                           | 0.64923596                             |
| 160.325                                                      | 1                                               | 287.5617797                           | 0.250905847                            |
| 218.8190045                                                  | 0.942307692                                     | 341.3206337                           | 0.366935269                            |
| 65.5                                                         | 1                                               | 116.5908239                           | 0.33830933                             |
| 265.1818182                                                  | 1                                               | 596.3316326                           | 0.314214878                            |
| 116.4597701                                                  | 0.99137931                                      | 314.3973006                           | 0.431528439                            |

| log.sigma.3.5.mm.3D_glc_m_Homogeneity2 | log.sigma.3.5.mm.3D_glc_m_ClusterShade | log.sigma.3.5.mm.3D_glc_m_MaximumProbability | log.sigma.3.5.mm.3D_glc_m_Idmn | log.sigma.3.5.mm.3D_glc_m_SumVariance2 |
|----------------------------------------|----------------------------------------|----------------------------------------------|--------------------------------|----------------------------------------|
| 0.336426252                            | -9.024914642                           | 0.028621441                                  | 0.981163454                    | 43.87874693                            |
| 0.492004759                            | -102.579083                            | 0.144176169                                  | 0.983466598                    | 29.75625047                            |
| 0.328968089                            | 72.6328326                             | 0.039328784                                  | 0.973298978                    | 27.62966393                            |
| 0.353213357                            | -11.4376093                            | 0.063967992                                  | 0.986270116                    | 45.46826712                            |
| 0.190574565                            | 426.6522183                            | 0.031460926                                  | 0.955262344                    | 78.03551656                            |
| 0.361592668                            | 24.6856244                             | 0.051252038                                  | 0.957721418                    | 13.20522539                            |
| 0.329798075                            | -6.050227542                           | 0.073807175                                  | 0.93612392                     | 11.92801345                            |
| 0.269907478                            | 96.36449093                            | 0.032666184                                  | 0.977645444                    | 34.27676508                            |
| 0.200872293                            | 1734.151946                            | 0.008903455                                  | 0.973272306                    | 245.6182757                            |
| 0.477832314                            | -48.40319349                           | 0.077103941                                  | 0.991432976                    | 24.23455487                            |
| 0.319033351                            | 17.80411367                            | 0.03524098                                   | 0.971834502                    | 16.31506323                            |
| 0.377377994                            | -30.46258663                           | 0.029551016                                  | 0.986697779                    | 32.22370096                            |
| 0.393905439                            | 49.39339105                            | 0.036857293                                  | 0.981892919                    | 20.64245012                            |
| 0.335118048                            | 133.6111535                            | 0.033934699                                  | 0.975935183                    | 28.14889002                            |
| 0.26663626                             | 113.809702                             | 0.023485081                                  | 0.96994475                     | 33.44343128                            |
| 0.726621872                            | -83.07921435                           | 0.300758005                                  | 0.997308519                    | 11.64152537                            |
| 0.231458276                            | 84.9408536                             | 0.023109964                                  | 0.956947899                    | 35.33272018                            |
| 0.402585448                            | 2.691669451                            | 0.032883186                                  | 0.984287459                    | 25.00762694                            |
| 0.236505997                            | 271.8071184                            | 0.035953206                                  | 0.949925961                    | 53.13457654                            |
| 0.564460252                            | -59.97439321                           | 0.111393031                                  | 0.989106721                    | 24.65682246                            |
| 0.600862514                            | -51.20988487                           | 0.210920943                                  | 0.995004725                    | 15.39454364                            |
| 0.350112346                            | 79.83666125                            | 0.036533742                                  | 0.979082771                    | 29.23443446                            |
| 0.573475746                            | -92.60311226                           | 0.147666605                                  | 0.994072008                    | 20.30696538                            |
| 0.214058492                            | -764.0932509                           | 0.029168471                                  | 0.968029085                    | 134.3828292                            |
| 0.522664522                            | -45.60929876                           | 0.062486539                                  | 0.989319371                    | 17.65431191                            |
| 0.328512387                            | 0.092170841                            | 0.025280348                                  | 0.96589323                     | 28.88994402                            |
| 0.558855465                            | -35.44888246                           | 0.180372722                                  | 0.993673646                    | 16.13437522                            |
| 0.648927302                            | -104.85125                             | 0.303366313                                  | 0.99704564                     | 19.77487578                            |
| 0.554418228                            | -183.2908693                           | 0.25445573                                   | 0.99210292                     | 32.9013301                             |
| 0.517599532                            | -147.4883485                           | 0.170841385                                  | 0.989525906                    | 33.30666424                            |
| 0.58611841                             | -68.83348782                           | 0.193981632                                  | 0.994267095                    | 19.01010389                            |
| 0.632838486                            | -77.47963825                           | 0.250676949                                  | 0.995044502                    | 16.10584951                            |
| 0.366316781                            | -24.79641061                           | 0.071996997                                  | 0.984718801                    | 40.28902476                            |
| 0.170275285                            | 117.6536402                            | 0.143589744                                  | 0.915721858                    | 38.68809295                            |
| 0.201425835                            | 103.360963                             | 0.030442608                                  | 0.95961045                     | 69.27960364                            |
| 0.350942895                            | 13.76899885                            | 0.033232723                                  | 0.979812597                    | 30.12571189                            |
| 0.641047448                            | -125.9187106                           | 0.210544794                                  | 0.993040711                    | 20.4023107                             |
| 0.507048068                            | -38.91549709                           | 0.111511721                                  | 0.992060963                    | 24.86399622                            |
| 0.254434531                            | 148.3135641                            | 0.02138628                                   | 0.967222772                    | 59.67861571                            |
| 0.334789386                            | 56.93450065                            | 0.025559181                                  | 0.976421094                    | 41.88831911                            |
| 0.415101737                            | -131.3376942                           | 0.03559139                                   | 0.988192487                    | 37.86819116                            |
| 0.30813818                             | 56.1516377                             | 0.032112375                                  | 0.978395504                    | 24.47507866                            |
| 0.310889637                            | 3.576446771                            | 0.024484914                                  | 0.976269949                    | 25.1361793                             |
| 0.294533961                            | 143.230957                             | 0.02551569                                   | 0.98023408                     | 34.92024072                            |
| 0.284139518                            | 429.296163                             | 0.020534063                                  | 0.980346695                    | 58.68621808                            |
| 0.722820203                            | -55.23279054                           | 0.234486411                                  | 0.994209927                    | 10.60899003                            |
| 0.28906185                             | 1059.72319                             | 0.016558909                                  | 0.988204572                    | 77.70183733                            |
| 0.315188388                            | 59.94375249                            | 0.044347319                                  | 0.953147715                    | 19.96732858                            |
| 0.158951821                            | 33.71691762                            | 0.083687146                                  | 0.907040383                    | 36.0334274                             |
| 0.17435197                             | 238.7817168                            | 0.023215422                                  | 0.936671199                    | 89.53441898                            |
| 0.591401485                            | -89.99396424                           | 0.231661432                                  | 0.992694986                    | 21.14969052                            |
| 0.319269409                            | 67.82193868                            | 0.041922677                                  | 0.961884125                    | 20.83978101                            |
| 0.427036852                            | -95.94424615                           | 0.072381181                                  | 0.988801725                    | 35.95608842                            |
| 0.346845163                            | 58.34714485                            | 0.029360276                                  | 0.974678733                    | 34.1393645                             |
| 0.67977741                             | -99.6280868                            | 0.279459066                                  | 0.995315069                    | 16.28946955                            |
| 0.2685422                              | 35.57195447                            | 0.023332174                                  | 0.955873592                    | 37.41046157                            |
| 0.253493788                            | 105.3175068                            | 0.020006291                                  | 0.976314481                    | 46.33581517                            |
| 0.195708682                            | 89.97529345                            | 0.01582274                                   | 0.961631634                    | 83.46539501                            |
| 0.322654498                            | 35.84699619                            | 0.025712648                                  | 0.979406585                    | 37.16868767                            |
| 0.396746354                            | 43.64394256                            | 0.030361287                                  | 0.979371669                    | 29.91521891                            |
| 0.395982754                            | 38.9604832                             | 0.034213209                                  | 0.980398826                    | 31.29760659                            |
| 0.516604789                            | -131.1165163                           | 0.138636137                                  | 0.992709328                    | 34.72263506                            |
| 0.587615161                            | -54.36853792                           | 0.154851059                                  | 0.993268088                    | 16.36666963                            |
| 0.527880042                            | -47.28989155                           | 0.131462905                                  | 0.984834471                    | 21.10725954                            |
| 0.240341349                            | 17.60707889                            | 0.060097797                                  | 0.943844733                    | 36.30909864                            |
| 0.344130836                            | -66.75512972                           | 0.02572177                                   | 0.983610691                    | 41.41645267                            |
| 0.202472676                            | 21.90399605                            | 0.029516125                                  | 0.940144014                    | 42.87526559                            |
| 0.479110476                            | -125.9987566                           | 0.113887516                                  | 0.990136671                    | 43.03922232                            |
| 0.332986308                            | 77.26713792                            | 0.057759599                                  | 0.959880524                    | 16.81309028                            |
| 0.448661326                            | -57.02849811                           | 0.072868546                                  | 0.986407157                    | 29.41724456                            |
| 0.445267392                            | -78.30654253                           | 0.0538871                                    | 0.986167492                    | 31.46633432                            |
| 0.331613952                            | 21.77174882                            | 0.025307185                                  | 0.973671488                    | 25.88834972                            |
| 0.619404119                            | -99.83554271                           | 0.167807337                                  | 0.994197037                    | 21.24632021                            |
| 0.663913908                            | -81.16362046                           | 0.243564321                                  | 0.992757947                    | 16.20586028                            |
| 0.648015916                            | -78.04675622                           | 0.22889062                                   | 0.996604108                    | 16.82964695                            |
| 0.270282993                            | 62.53192599                            | 0.025499598                                  | 0.973369928                    | 36.37847391                            |
| 0.33063068                             | 7.170348278                            | 0.036961068                                  | 0.973324212                    | 22.64227017                            |
| 0.366210377                            | 38.32460054                            | 0.054453686                                  | 0.968303502                    | 12.81255778                            |
| 0.339520443                            | -63.44868453                           | 0.023137183                                  | 0.981452844                    | 31.45123505                            |
| 0.513067597                            | -76.90633042                           | 0.156573841                                  | 0.991813069                    | 24.98102711                            |
| 0.265319406                            | 61.52584804                            | 0.037669837                                  | 0.953445165                    | 35.33960177                            |
| 0.302866275                            | 62.63378514                            | 0.020422167                                  | 0.980247216                    | 51.57255938                            |
| 0.527733908                            | -168.9050936                           | 0.137090277                                  | 0.992285487                    | 30.89149833                            |
| 0.164966055                            | 2.841848834                            | 0.064300016                                  | 0.917359631                    | 46.74169053                            |
| 0.572100006                            | -64.0975967                            | 0.150885948                                  | 0.991309184                    | 18.2825215                             |
| 0.464561273                            | 5.69118416                             | 0.053515881                                  | 0.989574171                    | 17.75925662                            |
| 0.328192373                            | 44.88528406                            | 0.029946502                                  | 0.973584567                    | 23.13696637                            |
| 0.239590161                            | 59.08885106                            | 0.01810477                                   | 0.970630805                    | 52.41179097                            |
| 0.297886206                            | -2.023429058                           | 0.071619829                                  | 0.92576982                     | 12.4715412                             |
| 0.192048404                            | 39.23059265                            | 0.109126984                                  | 0.866227461                    | 25.32590073                            |
| 0.494958792                            | -197.7470177                           | 0.110571041                                  | 0.990640257                    | 40.18834203                            |
| 0.295414952                            | 144.5053386                            | 0.029939255                                  | 0.966010374                    | 37.56036263                            |
| 0.377227548                            | -13.75854524                           | 0.04101879                                   | 0.974616678                    | 25.69369229                            |
| 0.533356879                            | -80.6455048                            | 0.110080381                                  | 0.989870306                    | 27.86184576                            |
| 0.61539104                             | -82.06639131                           | 0.223407494                                  | 0.992974987                    | 19.48393119                            |
| 0.15650766                             | 254.4099858                            | 0.036388818                                  | 0.940866736                    | 51.64530017                            |
| 0.280004467                            | 101.2608549                            | 0.016379432                                  | 0.975769224                    | 49.24620689                            |
| 0.245615795                            | 44.17209459                            | 0.113225983                                  | 0.886219161                    | 29.25204263                            |
| 0.220732246                            | 256.4296308                            | 0.026307696                                  | 0.971559188                    | 82.46352321                            |
| 0.352573788                            | -103.5857876                           | 0.040025633                                  | 0.979601774                    | 36.38453585                            |

| log.sigma.3.5.mm.3D_glc_m_Contrast | log.sigma.3.5.mm.3D_glc_m_DifferenceEntropy | log.sigma.3.5.mm.3D_glc_m_InverseVariance | log.sigma.3.5.mm.3D_glc_m_Entropy | log.sigma.3.5.mm.3D_glc_m_Dissimilarity |
|------------------------------------|---------------------------------------------|-------------------------------------------|-----------------------------------|-----------------------------------------|
| 8.81898424                         | 2.699547814                                 | 0.34127414                                | 6.884197186                       | 2.322397393                             |
| 5.175916696                        | 2.386495454                                 | 0.381754574                               | 6.016245524                       | 1.580096426                             |
| 8.354689287                        | 2.595075005                                 | 0.356039398                               | 6.236010558                       | 2.294959363                             |
| 14.07357361                        | 3.020455085                                 | 0.312468965                               | 7.31345648                        | 2.680991281                             |
| 32.03494695                        | 3.353307459                                 | 0.187520882                               | 6.440040235                       | 4.503347849                             |
| 8.272443169                        | 2.64591251                                  | 0.368558601                               | 5.931232776                       | 2.197592031                             |
| 9.41574232                         | 2.507002351                                 | 0.332480765                               | 4.970315363                       | 2.400062187                             |
| 16.31924498                        | 3.106271766                                 | 0.282292321                               | 7.098333853                       | 3.138861453                             |
| 44.75784752                        | 3.779188484                                 | 0.208395736                               | 8.935425213                       | 5.045331509                             |
| 4.71554008                         | 2.34459434                                  | 0.410715517                               | 6.231217946                       | 1.55752286                              |
| 9.982377067                        | 2.772757447                                 | 0.334235298                               | 6.41355314                        | 2.474345506                             |
| 7.433930123                        | 2.570280882                                 | 0.384115779                               | 6.751393654                       | 2.057935018                             |
| 7.87954744                         | 2.623065007                                 | 0.382093972                               | 6.462970184                       | 2.049307516                             |
| 11.6516682                         | 2.874118987                                 | 0.341231122                               | 6.724506679                       | 2.554854456                             |
| 16.01871141                        | 3.077182369                                 | 0.278518159                               | 6.991622329                       | 3.134843421                             |
| 1.74858498                         | 1.614511058                                 | 0.354057125                               | 4.081509755                       | 0.705346983                             |
| 21.50933178                        | 3.154866584                                 | 0.240343091                               | 6.77735918                        | 3.684569546                             |
| 7.419681102                        | 2.61556731                                  | 0.372240945                               | 6.590701994                       | 2.00598288                              |
| 25.98765879                        | 3.341908874                                 | 0.247336928                               | 6.731583512                       | 3.93017883                              |
| 2.938436754                        | 2.063475917                                 | 0.414620791                               | 5.673827879                       | 1.179291649                             |
| 2.493124132                        | 1.962730637                                 | 0.415921344                               | 5.128637964                       | 1.047478936                             |
| 11.0791223                         | 2.843567355                                 | 0.343989008                               | 6.815782003                       | 2.454292253                             |
| 2.964600625                        | 2.051834003                                 | 0.422219701                               | 5.478877791                       | 1.159806833                             |
| 23.56860628                        | 3.227014384                                 | 0.227548418                               | 6.588209995                       | 3.90980812                              |
| 3.248245936                        | 2.099404939                                 | 0.450549984                               | 5.682486602                       | 1.291119798                             |
| 9.695911839                        | 2.739785257                                 | 0.638090995                               | 6.638406274                       | 2.427756269                             |
| 3.489475775                        | 2.142521812                                 | 0.407640935                               | 5.470123449                       | 1.244682906                             |
| 2.551632434                        | 1.916460631                                 | 0.360177089                               | 4.719090341                       | 0.963903244                             |
| 5.621642714                        | 2.380334205                                 | 0.330844245                               | 5.617508845                       | 1.485295371                             |
| 4.401211029                        | 2.307366937                                 | 0.383830493                               | 5.915667523                       | 1.447291593                             |
| 3.161689876                        | 2.074756201                                 | 0.402198367                               | 5.359873837                       | 1.150436935                             |
| 2.984176815                        | 1.987135234                                 | 0.381297762                               | 5.009352167                       | 1.034145046                             |
| 10.16751359                        | 2.834524355                                 | 0.323963387                               | 7.026210808                       | 2.357255821                             |
| 35.13269231                        | 1.971091104                                 | 0.201261643                               | 3.170512738                       | 4.755769231                             |
| 28.50151489                        | 3.315140937                                 | 0.210540922                               | 6.488598084                       | 4.252452456                             |
| 9.570415479                        | 2.783164236                                 | 0.340195896                               | 6.880248324                       | 2.349436837                             |
| 2.642297093                        | 1.941315639                                 | 0.375914986                               | 4.755567083                       | 0.990241628                             |
| 4.767314201                        | 2.345674738                                 | 0.397107054                               | 6.112478307                       | 1.499478561                             |
| 21.16610189                        | 3.171373279                                 | 0.273107353                               | 7.279867789                       | 3.515824859                             |
| 9.163798195                        | 2.730243219                                 | 0.338107369                               | 6.924040348                       | 2.365807951                             |
| 6.638066327                        | 2.485560643                                 | 0.408161728                               | 6.580413454                       | 1.872196489                             |
| 12.38280295                        | 2.920702661                                 | 0.315273557                               | 6.664129688                       | 2.694002842                             |
| 11.32071996                        | 2.869479438                                 | 0.318236102                               | 6.923843103                       | 2.615031752                             |
| 14.42573274                        | 3.002809102                                 | 0.305687007                               | 7.000182184                       | 2.888668064                             |
| 15.30763689                        | 3.078566216                                 | 0.291209382                               | 7.54467083                        | 3.023017322                             |
| 1.78633586                         | 1.522625206                                 | 0.378432798                               | 3.935335515                       | 0.652723126                             |
| 22.327712694                       | 3.267373191                                 | 0.292265885                               | 7.822340162                       | 3.341514333                             |
| 12.24115501                        | 2.908519148                                 | 0.321977641                               | 6.307186212                       | 2.697332554                             |
| 38.93186536                        | 2.501606602                                 | 0.182113324                               | 4.067086532                       | 5.05541403                              |
| 43.42051069                        | 3.608300444                                 | 0.179240844                               | 6.931448775                       | 5.273270875                             |
| 3.378222154                        | 2.115022948                                 | 0.376020432                               | 5.351101996                       | 1.172646135                             |
| 10.93089294                        | 2.847200984                                 | 0.313079854                               | 6.452370602                       | 2.584604742                             |
| 6.785004856                        | 2.557686822                                 | 0.379779249                               | 6.65608884                        | 1.88561418                              |
| 7.885206089                        | 2.589955498                                 | 0.35404485                                | 6.562323949                       | 2.212543693                             |
| 2.153302141                        | 1.798458881                                 | 0.368945882                               | 4.537772176                       | 0.853334776                             |
| 18.63428932                        | 3.177314286                                 | 0.273262553                               | 7.135864006                       | 3.301660022                             |
| 20.0666154                         | 3.240900354                                 | 0.257327184                               | 7.565477943                       | 3.480750762                             |
| 33.55517404                        | 3.534799884                                 | 0.195686771                               | 7.842041782                       | 4.610431675                             |
| 10.71276573                        | 2.803164792                                 | 0.333658062                               | 6.836210692                       | 2.516544099                             |
| 5.653991806                        | 2.404707532                                 | 0.393390353                               | 6.43350636                        | 1.84803848                              |
| 6.82829589                         | 2.574579943                                 | 0.369829801                               | 6.571239659                       | 1.97595829                              |
| 6.923561745                        | 2.499948982                                 | 0.365583861                               | 6.203195795                       | 1.663891999                             |
| 2.800890088                        | 2.009410541                                 | 0.416596806                               | 5.366746462                       | 1.11211505                              |
| 3.636362197                        | 2.185855111                                 | 0.403258535                               | 5.703972478                       | 1.342255738                             |
| 16.4235157                         | 2.817443686                                 | 0.207022813                               | 5.215437826                       | 3.339141544                             |
| 11.94816924                        | 2.86367987                                  | 0.342112792                               | 7.114064763                       | 2.530519675                             |
| 25.14938796                        | 3.184661862                                 | 0.209898498                               | 6.337454265                       | 4.094818612                             |
| 6.489096596                        | 2.534143284                                 | 0.362861629                               | 6.399833578                       | 1.740606129                             |
| 10.38406368                        | 2.784574009                                 | 0.335832004                               | 5.826939519                       | 2.466566286                             |
| 5.780829449                        | 2.457296816                                 | 0.400298564                               | 6.42977761                        | 1.732860742                             |
| 6.574186466                        | 2.512168309                                 | 0.395872427                               | 6.515172222                       | 1.804178262                             |
| 9.298170193                        | 2.741610443                                 | 0.341210204                               | 6.748069183                       | 2.378208886                             |
| 2.656141443                        | 1.982409693                                 | 0.385551055                               | 5.100462878                       | 1.035729209                             |
| 1.946264727                        | 1.797571758                                 | 0.390054547                               | 4.689680098                       | 0.862122737                             |
| 3.396751415                        | 1.977429837                                 | 0.378750408                               | 4.910550447                       | 1.032168226                             |
| 19.72118602                        | 3.200073626                                 | 0.277887741                               | 7.195806849                       | 3.386757471                             |
| 10.51910872                        | 2.823359821                                 | 0.329905438                               | 6.667213141                       | 2.499923369                             |
| 8.113789846                        | 2.611345                                    | 0.363585016                               | 5.790028555                       | 2.146285985                             |
| 9.567034751                        | 2.750175395                                 | 0.335003311                               | 6.857279768                       | 2.382297088                             |
| 5.389948643                        | 2.386513804                                 | 0.38541032                                | 5.938136536                       | 1.537247149                             |
| 19.33389696                        | 3.121921672                                 | 0.255452421                               | 6.292831091                       | 3.416638826                             |
| 16.89570149                        | 3.118256116                                 | 0.309807882                               | 7.475390134                       | 3.017001976                             |
| 6.398607509                        | 2.440878821                                 | 0.369331366                               | 5.999891268                       | 1.592619516                             |
| 37.27277455                        | 2.904959146                                 | 0.178748691                               | 4.628279691                       | 4.949464104                             |
| 3.311083502                        | 2.111020051                                 | 0.409419066                               | 5.467229534                       | 1.199672901                             |
| 5.821205585                        | 2.445899711                                 | 0.408895557                               | 6.224181973                       | 1.69114782                              |
| 9.314193043                        | 2.744935899                                 | 0.338923907                               | 6.538464817                       | 2.390170749                             |
| 23.45767951                        | 3.357827821                                 | 0.237604705                               | 7.636326557                       | 3.782466205                             |
| 11.03564389                        | 2.518499915                                 | 0.298622028                               | 4.914121708                       | 2.657904405                             |
| 26.26587302                        | 2.568005041                                 | 0.216255354                               | 3.814036787                       | 4.265873016                             |
| 6.696897519                        | 2.523792577                                 | 0.361912187                               | 6.279882593                       | 1.711956797                             |
| 12.28850648                        | 2.880254591                                 | 0.31688808                                | 6.755519982                       | 2.744767266                             |
| 9.145924942                        | 2.708771637                                 | 0.346187129                               | 6.435196234                       | 2.225285571                             |
| 3.869956615                        | 2.212938782                                 | 0.405760374                               | 5.980070696                       | 1.34325088                              |
| 2.650114971                        | 1.988200272                                 | 0.389466922                               | 5.14396908                        | 1.042047316                             |
| 47.13535806                        | 3.3545484                                   | 0.169305141                               | 5.747367455                       | 5.52616359                              |
| 16.45329938                        | 3.117869794                                 | 0.293552481                               | 7.496860255                       | 3.112240078                             |
| 25.31054949                        | 2.375902969                                 | 0.148288671                               | 3.919501079                       | 4.064934425                             |
| 24.15465083                        | 3.286185032                                 | 0.232335714                               | 6.840352815                       | 3.923427693                             |
| 8.792729855                        | 2.677811506                                 | 0.345064475                               | 6.522143687                       | 2.264336025                             |

| log.sigma.3.5.mm.3D_glcml_DifferenceVariance | log.sigma.3.5.mm.3D_glcml_ldn | log.sigma.3.5.mm.3D_glcml_ldm | log.sigma.3.5.mm.3D_glcml_Correlation | log.sigma.3.5.mm.3D_glcml_Autocorrelation |
|----------------------------------------------|-------------------------------|-------------------------------|---------------------------------------|-------------------------------------------|
| 3.35375309                                   | 0.905748185                   | 0.336426252                   | 0.665101454                           | 147.6739483                               |
| 2.579959727                                  | 0.921349192                   | 0.492004759                   | 0.702188876                           | 131.2262558                               |
| 2.922875282                                  | 0.887919524                   | 0.328968089                   | 0.531856222                           | 43.44228119                               |
| 6.703329503                                  | 0.92545823                    | 0.353213357                   | 0.526927844                           | 170.9654726                               |
| 11.15579134                                  | 0.857904569                   | 0.190574565                   | 0.420383349                           | 94.91965773                               |
| 3.361664363                                  | 0.866957949                   | 0.361592668                   | 0.230577317                           | 40.9477601                                |
| 3.249408415                                  | 0.836230075                   | 0.329798075                   | 0.14078721                            | 30.17448956                               |
| 6.325263359                                  | 0.898551752                   | 0.269907478                   | 0.353804912                           | 99.89416442                               |
| 18.60097844                                  | 0.893475475                   | 0.200872293                   | 0.694798807                           | 387.7352861                               |
| 2.246142237                                  | 0.939871569                   | 0.477832314                   | 0.670809975                           | 139.4425313                               |
| 3.733548148                                  | 0.886664772                   | 0.319033351                   | 0.238176801                           | 73.72447294                               |
| 3.027647699                                  | 0.922171387                   | 0.377377994                   | 0.621419617                           | 117.7515465                               |
| 3.570338454                                  | 0.913197725                   | 0.393905439                   | 0.443661211                           | 60.36770764                               |
| 4.995313413                                  | 0.898996068                   | 0.335118048                   | 0.414826769                           | 53.42623157                               |
| 5.960262031                                  | 0.883209652                   | 0.26663626                    | 0.354930229                           | 66.60294001                               |
| 1.236148195                                  | 0.974199138                   | 0.726621872                   | 0.735476046                           | 168.0569729                               |
| 6.876272688                                  | 0.861074898                   | 0.231458276                   | 0.271786706                           | 61.7874432                                |
| 3.292993043                                  | 0.918145112                   | 0.402585448                   | 0.541977367                           | 65.47607753                               |
| 9.836642967                                  | 0.855363118                   | 0.236505997                   | 0.350525151                           | 54.4944835                                |
| 1.508009552                                  | 0.935843175                   | 0.564460252                   | 0.785854726                           | 98.04890732                               |
| 1.374929475                                  | 0.95687351                    | 0.600862514                   | 0.719391909                           | 133.8831239                               |
| 4.875857033                                  | 0.906467121                   | 0.350112346                   | 0.444149426                           | 75.15288214                               |
| 1.579963098                                  | 0.952575301                   | 0.573475746                   | 0.743237182                           | 151.0198435                               |
| 7.757263325                                  | 0.876914777                   | 0.214058492                   | 0.703251747                           | 276.7563191                               |
| 1.54095181                                   | 0.933447979                   | 0.522664522                   | 0.685684463                           | 93.68445696                               |
| 3.613429787                                  | 0.883202153                   | 0.328512387                   | 0.495132063                           | 77.17845573                               |
| 1.907300513                                  | 0.951515387                   | 0.558855465                   | 0.642694543                           | 95.91277678                               |
| 1.590381129                                  | 0.969444176                   | 0.648927302                   | 0.769126506                           | 163.3282348                               |
| 3.334532135                                  | 0.949806248                   | 0.554418228                   | 0.706146009                           | 170.048061                                |
| 2.261157925                                  | 0.936819139                   | 0.517599532                   | 0.764111076                           | 153.8535273                               |
| 1.807344704                                  | 0.955086779                   | 0.58611841                    | 0.712282804                           | 133.2867546                               |
| 1.886284048                                  | 0.961311478                   | 0.632838486                   | 0.682919515                           | 121.6551475                               |
| 4.49395151                                   | 0.919004385                   | 0.366316781                   | 0.596320843                           | 112.9596715                               |
| 9.992836538                                  | 0.808312325                   | 0.170275285                   | 0.031862162                           | 58.75                                     |
| 9.812882136                                  | 0.864268541                   | 0.201425835                   | 0.419247581                           | 123.9653487                               |
| 3.916822767                                  | 0.905552074                   | 0.350942895                   | 0.518219004                           | 125.2757748                               |
| 1.634149634                                  | 0.954010819                   | 0.641047448                   | 0.768816098                           | 149.8759578                               |
| 2.476181309                                  | 0.944543189                   | 0.507048068                   | 0.676004163                           | 112.4372553                               |
| 8.063884013                                  | 0.881443505                   | 0.254434531                   | 0.47827173                            | 106.0483106                               |
| 3.43404105                                   | 0.895782275                   | 0.334789386                   | 0.639790189                           | 83.56799224                               |
| 3.032830261                                  | 0.928945938                   | 0.415101737                   | 0.700818881                           | 156.1435479                               |
| 5.014288393                                  | 0.901504657                   | 0.30813818                    | 0.329213179                           | 87.09501385                               |
| 4.295168159                                  | 0.895892352                   | 0.310889637                   | 0.377937534                           | 92.92861949                               |
| 5.924261666                                  | 0.905981844                   | 0.294533961                   | 0.414811173                           | 84.96473785                               |
| 5.961206288                                  | 0.905033393                   | 0.284139518                   | 0.587299431                           | 140.3385282                               |
| 0.732525376                                  | 0.958521696                   | 0.722820203                   | 0.795064633                           | 76.42059925                               |
| 10.8347565                                   | 0.930740226                   | 0.28906185                    | 0.559125391                           | 140.0326283                               |
| 4.829469205                                  | 0.859932169                   | 0.315188388                   | 0.231444971                           | 36.28248397                               |
| 12.30952224                                  | 0.798928831                   | 0.158951821                   | -0.049811616                          | 78.09119492                               |
| 14.40024961                                  | 0.833892485                   | 0.17435197                    | 0.346066313                           | 110.2262454                               |
| 1.971413146                                  | 0.950605298                   | 0.591401485                   | 0.722795678                           | 134.6944287                               |
| 4.09128183                                   | 0.870847357                   | 0.319269409                   | 0.316692141                           | 49.62991524                               |
| 3.113847645                                  | 0.931262434                   | 0.427036852                   | 0.681454836                           | 182.0816707                               |
| 2.789716252                                  | 0.891603998                   | 0.346845163                   | 0.623529677                           | 67.21717201                               |
| 1.404697468                                  | 0.96352898                    | 0.67977741                    | 0.763680936                           | 114.1131255                               |
| 7.498587885                                  | 0.863838451                   | 0.2685422                     | 0.337459863                           | 67.8997408                                |
| 7.593174172                                  | 0.896059722                   | 0.253493788                   | 0.392107457                           | 144.7541611                               |
| 11.2980509                                   | 0.8679463                     | 0.195708682                   | 0.422934568                           | 162.2419719                               |
| 4.245860246                                  | 0.903388473                   | 0.322654498                   | 0.548655231                           | 103.7175681                               |
| 2.133118357                                  | 0.902353495                   | 0.396746354                   | 0.679158337                           | 62.01840833                               |
| 2.857483622                                  | 0.907185989                   | 0.395982754                   | 0.641172292                           | 80.57600993                               |
| 4.088907946                                  | 0.950949806                   | 0.516604789                   | 0.666257571                           | 209.1232711                               |
| 1.510096615                                  | 0.950374319                   | 0.587615161                   | 0.705095147                           | 93.96582286                               |
| 1.768753849                                  | 0.923673284                   | 0.527880042                   | 0.703411536                           | 77.0355519                                |
| 4.818610451                                  | 0.838707722                   | 0.240341349                   | 0.377149203                           | 72.1065818                                |
| 5.296213505                                  | 0.916884828                   | 0.344130836                   | 0.551927993                           | 149.7198766                               |
| 7.613847682                                  | 0.835054035                   | 0.202472676                   | 0.266378531                           | 83.0393275                                |
| 3.398227536                                  | 0.939030676                   | 0.479110476                   | 0.736573166                           | 120.7193007                               |
| 4.213159584                                  | 0.869748936                   | 0.332986308                   | 0.237691618                           | 34.93905709                               |
| 2.710229424                                  | 0.92520409                    | 0.448661326                   | 0.67037259                            | 113.1720226                               |
| 3.21360396                                   | 0.926125753                   | 0.445267392                   | 0.651139237                           | 154.5474781                               |
| 3.526540392                                  | 0.890482439                   | 0.331613952                   | 0.472347659                           | 73.35817904                               |
| 1.558084902                                  | 0.955844065                   | 0.619404119                   | 0.776243212                           | 122.3089052                               |
| 1.18707751                                   | 0.952500877                   | 0.663913908                   | 0.782960372                           | 87.7499942                                |
| 2.310874527                                  | 0.969731665                   | 0.648015916                   | 0.662661453                           | 165.3477481                               |
| 7.74949622                                   | 0.892527878                   | 0.270282993                   | 0.300993417                           | 126.88093                                 |
| 4.108640442                                  | 0.89129026                    | 0.33063068                    | 0.362390536                           | 85.00639658                               |
| 3.442932095                                  | 0.884099265                   | 0.366210377                   | 0.22738597                            | 24.17270134                               |
| 3.677018281                                  | 0.907792958                   | 0.339520443                   | 0.520417822                           | 153.4053111                               |
| 2.973268048                                  | 0.945713816                   | 0.513067597                   | 0.643339886                           | 164.5449013                               |
| 7.118583907                                  | 0.859592845                   | 0.265319406                   | 0.302213794                           | 92.76886129                               |
| 7.616496311                                  | 0.90927366                    | 0.302866275                   | 0.504850117                           | 196.4618966                               |
| 3.772762392                                  | 0.949889723                   | 0.527733908                   | 0.655526023                           | 258.3297978                               |
| 12.01632536                                  | 0.809876944                   | 0.164966055                   | 0.089157262                           | 106.4798031                               |
| 1.839496779                                  | 0.944502068                   | 0.572100006                   | 0.691012156                           | 96.73078809                               |
| 2.879193857                                  | 0.935611964                   | 0.464561273                   | 0.505018071                           | 104.7521861                               |
| 3.5259403                                    | 0.889892498                   | 0.328192373                   | 0.42411488                            | 61.88846984                               |
| 8.887367458                                  | 0.885016647                   | 0.239590161                   | 0.378705447                           | 139.6158203                               |
| 3.528764304                                  | 0.82151114                    | 0.297886206                   | 0.078621384                           | 36.28253836                               |
| 7.702317964                                  | 0.760145944                   | 0.192048404                   | 0.006211415                           | 42.5952381                                |
| 3.692594115                                  | 0.942359452                   | 0.494958792                   | 0.711725365                           | 197.3927586                               |
| 4.530175567                                  | 0.876521692                   | 0.295414952                   | 0.50301634                            | 57.72627697                               |
| 4.003309385                                  | 0.898153739                   | 0.377227548                   | 0.478108502                           | 75.65676986                               |
| 2.014421112                                  | 0.938193684                   | 0.533356879                   | 0.754281516                           | 126.4835809                               |
| 1.542353915                                  | 0.951369043                   | 0.61539104                    | 0.758787503                           | 101.9216441                               |
| 13.30991668                                  | 0.83755929                    | 0.15650766                    | 0.075699966                           | 95.41770889                               |
| 6.571588432                                  | 0.896308343                   | 0.280004467                   | 0.499452312                           | 127.7423255                               |
| 8.098460096                                  | 0.784763239                   | 0.245615795                   | 0.081077188                           | 36.67255821                               |
| 8.348096186                                  | 0.88422977                    | 0.220732246                   | 0.54459759                            | 203.3692571                               |
| 3.535216948                                  | 0.904408753                   | 0.352573788                   | 0.608232824                           | 118.4548802                               |

| log.sigma.3.5.mm.3D_glcm_SumEntropy | log.sigma.3.5.mm.3D_glcm_AverageIntensity | log.sigma.3.5.mm.3D_glcm_Energy | log.sigma.3.5.mm.3D_glcm_SumSquares | log.sigma.3.5.mm.3D_glcm_ClusterProminence |
|-------------------------------------|-------------------------------------------|---------------------------------|-------------------------------------|--------------------------------------------|
| 4.636452896                         | 11.7854004                                | 0.010514774                     | 13.17443279                         | 4547.388706                                |
| 4.219523023                         | 11.18369699                               | 0.034379354                     | 8.733041792                         | 2274.436671                                |
| 4.187795807                         | 6.212307181                               | 0.016201573                     | 8.996088305                         | 2218.675186                                |
| 4.710301045                         | 12.79378326                               | 0.011896587                     | 15.15138686                         | 6967.613635                                |
| 4.608993331                         | 9.130021492                               | 0.012885509                     | 27.51761588                         | 18578.15329                                |
| 3.772364791                         | 6.301729159                               | 0.021927326                     | 5.36941714                          | 584.859467                                 |
| 3.82580407                          | 5.429348462                               | 0.037003918                     | 5.335938942                         | 393.1087912                                |
| 4.475088274                         | 9.769646108                               | 0.009239316                     | 12.69634077                         | 4232.795291                                |
| 5.75731249                          | 18.66108325                               | 0.002668638                     | 73.79746268                         | 125562.7529                                |
| 4.259924756                         | 11.59992903                               | 0.022731105                     | 7.237523737                         | 2166.546889                                |
| 3.978490795                         | 8.493096925                               | 0.015318521                     | 6.574360073                         | 868.1283308                                |
| 4.494353322                         | 10.56166534                               | 0.012398189                     | 9.914407772                         | 3036.372879                                |
| 4.163343739                         | 7.561278097                               | 0.01601248                      | 7.13049939                          | 1540.362951                                |
| 4.298235563                         | 7.021130885                               | 0.013250621                     | 9.950139554                         | 3483.616109                                |
| 4.397296689                         | 7.889099965                               | 0.009726937                     | 12.36553567                         | 3556.485302                                |
| 3.161806641                         | 12.86791479                               | 0.146115191                     | 3.347527589                         | 1234.514158                                |
| 4.317077711                         | 7.635479156                               | 0.010672716                     | 14.21051299                         | 3482.926784                                |
| 4.308070475                         | 7.815220415                               | 0.013734721                     | 8.106827009                         | 1646.627631                                |
| 4.532986145                         | 6.903906176                               | 0.011771338                     | 19.78055883                         | 7988.222599                                |
| 4.16666927                          | 9.623653493                               | 0.037179363                     | 6.898814803                         | 1410.592384                                |
| 3.747774569                         | 11.43044423                               | 0.064339341                     | 4.471916944                         | 794.5780718                                |
| 4.377374199                         | 8.402728993                               | 0.013154479                     | 10.07838919                         | 3193.823832                                |
| 3.985423571                         | 12.11116221                               | 0.04356616                      | 5.817891502                         | 1679.924564                                |
| 4.890888942                         | 15.83623336                               | 0.01169128                      | 40.21522827                         | 39662.97245                                |
| 4.01434774                          | 9.490747846                               | 0.027824329                     | 5.225639462                         | 990.7493874                                |
| 4.340251983                         | 8.506890675                               | 0.011720838                     | 9.646463965                         | 1832.027776                                |
| 3.847328294                         | 9.630627323                               | 0.053253252                     | 4.905962749                         | 1187.472514                                |
| 3.569978351                         | 12.61045121                               | 0.111679476                     | 5.583852285                         | 1440.717971                                |
| 4.012263539                         | 12.77591752                               | 0.076773388                     | 9.631265752                         | 3477.792317                                |
| 4.223830436                         | 12.10839569                               | 0.041758742                     | 9.426968817                         | 3065.987375                                |
| 3.885755495                         | 11.37194844                               | 0.057154875                     | 5.54294844                          | 1204.386031                                |
| 3.647283517                         | 10.87994646                               | 0.085234512                     | 4.772506581                         | 1192.121492                                |
| 4.61073768                          | 10.26756409                               | 0.013099281                     | 12.61413459                         | 3869.478746                                |
| 2.161538379                         | 7.568269231                               | 0.12608974                      | 18.45519631                         | 4155.598743                                |
| 4.584313095                         | 10.66166361                               | 0.012414034                     | 24.44527963                         | 11950.05253                                |
| 4.433621362                         | 10.96064932                               | 0.011100578                     | 9.924031842                         | 2267.724528                                |
| 3.586702161                         | 12.05960209                               | 0.094698438                     | 5.761151949                         | 1712.113718                                |
| 4.233837557                         | 10.3639099                                | 0.028963582                     | 7.407827605                         | 1600.219055                                |
| 4.820017873                         | 9.816908758                               | 0.007901811                     | 20.2111794                          | 9582.006755                                |
| 4.588248636                         | 8.682288002                               | 0.010152139                     | 12.76302933                         | 3685.456271                                |
| 4.543460505                         | 12.17877701                               | 0.014714379                     | 11.12656437                         | 4471.157649                                |
| 4.210473241                         | 9.168883997                               | 0.013005893                     | 9.214470402                         | 2642.883492                                |
| 4.327968193                         | 9.4586677                                 | 0.010599903                     | 9.114224815                         | 1814.185151                                |
| 4.46602471                          | 8.935570518                               | 0.010187524                     | 12.37351956                         | 5229.194271                                |
| 4.816681944                         | 11.39681868                               | 0.007604658                     | 18.84397751                         | 14181.51648                                |
| 3.124425564                         | 8.605857337                               | 0.130460657                     | 2.946095903                         | 567.4319194                                |
| 4.980498524                         | 11.37150247                               | 0.006758417                     | 26.57120182                         | 47843.08733                                |
| 4.00190136                          | 5.859893413                               | 0.016772484                     | 8.052120898                         | 1334.655624                                |
| 2.838082203                         | 8.866623654                               | 0.063441214                     | 18.74132319                         | 3495.959595                                |
| 4.853639563                         | 9.928779979                               | 0.009151531                     | 33.23873242                         | 18621.81147                                |
| 3.874714662                         | 11.4126854                                | 0.070463749                     | 6.131978168                         | 1519.668113                                |
| 4.078704273                         | 6.866381298                               | 0.015864367                     | 7.942668487                         | 1418.919409                                |
| 4.491442345                         | 13.22054243                               | 0.016828474                     | 10.68527332                         | 3180.382545                                |
| 4.441399617                         | 7.787799597                               | 0.012564012                     | 10.50614265                         | 2868.161807                                |
| 3.457319075                         | 10.51562142                               | 0.117944402                     | 4.610692923                         | 1365.124963                                |
| 4.520395973                         | 7.949841065                               | 0.008796112                     | 14.01118772                         | 3510.296017                                |
| 4.723245819                         | 11.76539677                               | 0.007172212                     | 16.83660991                         | 7285.540736                                |
| 5.058717836                         | 12.25812109                               | 0.005216047                     | 29.68326795                         | 16320.03379                                |
| 4.526823486                         | 9.853724933                               | 0.010979201                     | 11.97036335                         | 3657.654483                                |
| 4.38919493                          | 7.479908198                               | 0.014569697                     | 8.892302679                         | 2221.199591                                |
| 4.391032819                         | 8.628512238                               | 0.013659899                     | 9.53147562                          | 2220.099181                                |
| 4.325238383                         | 14.22718108                               | 0.039309472                     | 10.50946943                         | 4385.641626                                |
| 3.85877212                          | 9.517019766                               | 0.051170317                     | 4.79188993                          | 881.8533379                                |
| 4.057141627                         | 8.523900335                               | 0.036007357                     | 6.185905434                         | 1053.578599                                |
| 3.860870846                         | 8.192670476                               | 0.0301285                       | 13.18315359                         | 2852.237525                                |
| 4.635502042                         | 11.93284006                               | 0.010240273                     | 13.37830529                         | 4346.328838                                |
| 4.287731998                         | 8.860389188                               | 0.013774765                     | 17.00616339                         | 4635.326788                                |
| 4.452495674                         | 10.56295726                               | 0.028488648                     | 12.38207973                         | 4320.068067                                |
| 3.746479814                         | 5.77275399                                | 0.023473002                     | 6.79928849                          | 1286.444573                                |
| 4.381189334                         | 10.35642303                               | 0.018106678                     | 8.799518503                         | 2107.565569                                |
| 4.411121373                         | 12.17828463                               | 0.017440711                     | 9.510130197                         | 2616.111921                                |
| 4.317249407                         | 8.318977568                               | 0.011444156                     | 8.796629978                         | 1690.560967                                |
| 3.79588085                          | 10.8470664                                | 0.070596556                     | 5.975615413                         | 1430.153993                                |
| 3.572251546                         | 9.175107425                               | 0.094544436                     | 4.538031253                         | 1005.179844                                |
| 3.569923518                         | 12.7313274                                | 0.095211353                     | 5.099703686                         | 1735.382358                                |
| 4.505577239                         | 11.08146016                               | 0.009282893                     | 14.10039173                         | 4902.317752                                |
| 4.223284976                         | 9.053849751                               | 0.013486603                     | 8.290344722                         | 1598.654888                                |
| 3.704407824                         | 4.795343659                               | 0.023514312                     | 5.231586907                         | 678.0869496                                |
| 4.440789027                         | 12.1614912                                | 0.011062017                     | 10.25456745                         | 3150.338822                                |
| 4.135988844                         | 12.63497364                               | 0.038413056                     | 7.592743939                         | 1843.390217                                |
| 4.330853247                         | 9.420592912                               | 0.015279092                     | 13.66837468                         | 3608.477628                                |
| 4.815459239                         | 13.73954697                               | 0.007900112                     | 17.61528333                         | 8414.11962                                 |
| 4.19623404                          | 15.88807517                               | 0.044966435                     | 9.388582397                         | 3741.307662                                |
| 3.331128915                         | 10.19211712                               | 0.042949798                     | 21.00361627                         | 4726.284971                                |
| 3.894693506                         | 9.642888775                               | 0.048250241                     | 5.39840125                          | 1052.786033                                |
| 4.094191421                         | 10.08778855                               | 0.021686334                     | 5.895115552                         | 1131.363052                                |
| 4.190802593                         | 7.643836878                               | 0.013379112                     | 8.112789853                         | 1529.055421                                |
| 4.794836541                         | 11.51569069                               | 0.00643037                      | 19.15791246                         | 8846.717664                                |
| 3.395894376                         | 5.991103587                               | 0.037916816                     | 5.876796272                         | 371.8113107                                |
| 2.694989168                         | 6.537698413                               | 0.073759133                     | 12.89794344                         | 1380.483803                                |
| 4.366502003                         | 13.74850209                               | 0.034007481                     | 11.72796111                         | 4943.589311                                |
| 4.427143097                         | 7.168679725                               | 0.011588584                     | 12.46221728                         | 3891.099206                                |
| 4.253447055                         | 8.456649074                               | 0.015722014                     | 8.709904307                         | 1633.130882                                |
| 4.298422087                         | 10.97641839                               | 0.029837873                     | 7.932950594                         | 2055.163677                                |
| 3.788778698                         | 9.884896769                               | 0.075428294                     | 5.53351154                          | 1258.113846                                |
| 4.073522574                         | 9.736837725                               | 0.020153862                     | 25.29674518                         | 9080.490632                                |
| 4.776876353                         | 10.9331079                                | 0.007096692                     | 16.42487657                         | 6962.609929                                |
| 2.666876531                         | 5.933241225                               | 0.07365688                      | 13.64064803                         | 2004.462807                                |
| 4.8107457                           | 13.76624096                               | 0.010020927                     | 27.11093262                         | 19000.45661                                |
| 4.452076637                         | 10.56089294                               | 0.014564145                     | 11.29431643                         | 4002.040309                                |

| log.sigma.3.5.mm.3D_glc_m_SumAverage | log.sigma.3.5.mm.3D_glc_m_lmc2 | log.sigma.3.5.mm.3D_glc_m_lmc1 | log.sigma.3.5.mm.3D_glc_m_DifferenceAverage | log.sigma.3.5.mm.3D_glc_m_Id |
|--------------------------------------|--------------------------------|--------------------------------|---------------------------------------------|------------------------------|
| 23.57080079                          | 0.889629695                    | -0.20733352                    | 2.322397393                                 | 0.418334403                  |
| 22.36739397                          | 0.855840338                    | -0.209465299                   | 1.580096426                                 | 0.546324765                  |
| 12.42461436                          | 0.887831894                    | -0.226053739                   | 2.294959363                                 | 0.411609444                  |
| 25.54295133                          | 0.789516009                    | -0.13135399                    | 2.680991281                                 | 0.428824947                  |
| 18.26004298                          | 0.985232793                    | -0.434054139                   | 4.503347849                                 | 0.288084603                  |
| 12.60345832                          | 0.72961984                     | -0.12161776                    | 2.197592031                                 | 0.437054127                  |
| 10.85869692                          | 0.939148198                    | -0.369368931                   | 2.400062187                                 | 0.412686145                  |
| 19.53476665                          | 0.801878695                    | -0.136149957                   | 3.138861453                                 | 0.359644736                  |
| 36.74034016                          | 0.897029063                    | -0.17027721                    | 5.045331509                                 | 0.290305123                  |
| 23.19985807                          | 0.817194031                    | -0.170814077                   | 1.55752286                                  | 0.533100992                  |
| 16.98619385                          | 0.690452929                    | -0.09917786                    | 2.474345506                                 | 0.403058774                  |
| 21.12333068                          | 0.8195083                      | -0.163213455                   | 2.057935018                                 | 0.450319702                  |
| 15.12255619                          | 0.693936573                    | -0.105287348                   | 2.049307516                                 | 0.463443078                  |
| 14.04226177                          | 0.76189801                     | -0.125890642                   | 2.554854456                                 | 0.413625239                  |
| 15.77819993                          | 0.807556335                    | -0.14304801                    | 3.134843421                                 | 0.357467281                  |
| 25.73582958                          | 0.843300796                    | -0.273733397                   | 0.705346983                                 | 0.743472183                  |
| 15.27095831                          | 0.898402426                    | -0.219515534                   | 3.684569546                                 | 0.325417289                  |
| 15.63044083                          | 0.746686353                    | -0.123841679                   | 2.00598288                                  | 0.471515615                  |
| 13.80781235                          | 0.930352804                    | -0.260993583                   | 3.93017883                                  | 0.326100732                  |
| 19.24730699                          | 0.896503233                    | -0.260457462                   | 1.179291649                                 | 0.605527992                  |
| 22.86088846                          | 0.840857917                    | -0.22172979                    | 1.047478936                                 | 0.635519469                  |
| 16.80545799                          | 0.74166677                     | -0.118903705                   | 2.454292253                                 | 0.426713513                  |
| 24.22232441                          | 0.867217821                    | -0.236048662                   | 1.159806833                                 | 0.611931605                  |
| 31.54720337                          | 0.992225334                    | -0.486533323                   | 3.90980812                                  | 0.309616583                  |
| 18.98149569                          | 0.832226273                    | -0.198124553                   | 1.291119798                                 | 0.568178265                  |
| 17.01378135                          | 0.829681337                    | -0.165410403                   | 2.427756269                                 | 0.410639269                  |
| 19.26125465                          | 0.801189246                    | -0.180606569                   | 1.244682906                                 | 0.60079615                   |
| 25.22052172                          | 0.872497984                    | -0.274605551                   | 0.963903244                                 | 0.679067726                  |
| 25.55178866                          | 0.866882932                    | -0.23242757                    | 1.485295371                                 | 0.600684444                  |
| 24.21679139                          | 0.879483191                    | -0.23254143                    | 1.447291593                                 | 0.567969454                  |
| 22.74389688                          | 0.854241057                    | -0.227012394                   | 1.150436935                                 | 0.623801509                  |
| 21.75989292                          | 0.843224074                    | -0.229546991                   | 1.034145046                                 | 0.663461147                  |
| 20.53512817                          | 0.801538068                    | -0.141954907                   | 2.357255821                                 | 0.442519197                  |
| 15.13653846                          | 0.987093787                    | -0.784919305                   | 4.755769231                                 | 0.267434522                  |
| 21.32332723                          | 0.983684442                    | -0.423760125                   | 4.252452456                                 | 0.297245311                  |
| 21.92129864                          | 0.738235815                    | -0.11337438                    | 2.349436837                                 | 0.429118102                  |
| 24.11920418                          | 0.861371839                    | -0.259253816                   | 0.990241628                                 | 0.670956042                  |
| 20.7278198                           | 0.838245494                    | -0.188065834                   | 1.499478561                                 | 0.557704238                  |
| 19.63381752                          | 0.9051837                      | -0.216934134                   | 3.515824859                                 | 0.343619775                  |
| 17.364576                            | 0.840848245                    | -0.168801521                   | 2.365807951                                 | 0.416513487                  |
| 24.35755402                          | 0.886615231                    | -0.215603845                   | 1.872196489                                 | 0.480182022                  |
| 18.33776799                          | 0.77421932                     | -0.129501344                   | 2.694002842                                 | 0.393214156                  |
| 18.9173354                           | 0.669585672                    | -0.088039935                   | 2.615031752                                 | 0.396052813                  |
| 17.86835563                          | 0.798789962                    | -0.137800432                   | 2.888668064                                 | 0.380709366                  |
| 22.75881184                          | 0.795072232                    | -0.128779135                   | 3.023017322                                 | 0.371525752                  |
| 17.21171467                          | 0.847573787                    | -0.293227595                   | 0.652723126                                 | 0.739093202                  |
| 22.46625956                          | 0.772879382                    | -0.115181944                   | 3.341514333                                 | 0.372686504                  |
| 11.71978683                          | 0.774313307                    | -0.138969204                   | 2.697332554                                 | 0.397323388                  |
| 17.73324731                          | 0.997034309                    | -0.784905586                   | 5.05541403                                  | 0.256768122                  |
| 19.85755996                          | 0.981711809                    | -0.388031488                   | 5.273270875                                 | 0.266781578                  |
| 22.8253708                           | 0.861460058                    | -0.233871642                   | 1.172646135                                 | 0.629962274                  |
| 13.7327626                           | 0.713169711                    | -0.106080914                   | 2.584604742                                 | 0.403107514                  |
| 26.44108486                          | 0.822372619                    | -0.166852829                   | 1.88561418                                  | 0.491562564                  |
| 15.57559919                          | 0.883823822                    | -0.213038769                   | 2.212543693                                 | 0.426849139                  |
| 21.03124285                          | 0.85664519                     | -0.264991297                   | 0.853334776                                 | 0.703611182                  |
| 15.89968213                          | 0.83204473                     | -0.154101652                   | 3.301660022                                 | 0.357390529                  |
| 23.50144326                          | 0.774564816                    | -0.117038605                   | 3.480750762                                 | 0.344259105                  |
| 24.46410252                          | 0.905260865                    | -0.200407724                   | 4.610431675                                 | 0.289716858                  |
| 19.70744987                          | 0.878114511                    | -0.19850788                    | 2.516544099                                 | 0.405381186                  |
| 14.9598164                           | 0.86014193                     | -0.199703516                   | 1.84803848                                  | 0.467873662                  |
| 17.25702448                          | 0.811317689                    | -0.156520601                   | 1.97595829                                  | 0.467169423                  |
| 28.43744013                          | 0.863814128                    | -0.206651902                   | 1.663891999                                 | 0.56546047                   |
| 19.03403953                          | 0.831773027                    | -0.213592491                   | 1.11211505                                  | 0.624123534                  |
| 17.04780067                          | 0.84938439                     | -0.210629627                   | 1.342255738                                 | 0.575788632                  |
| 16.38534095                          | 0.983117309                    | -0.497757916                   | 3.339141544                                 | 0.339804173                  |
| 23.86141019                          | 0.822603629                    | -0.154510044                   | 2.530519675                                 | 0.421196999                  |
| 17.72077838                          | 0.976113976                    | -0.391533071                   | 4.094818612                                 | 0.299133793                  |
| 21.12591453                          | 0.876000111                    | -0.211468854                   | 1.740606129                                 | 0.53546478                   |
| 11.54550798                          | 0.817246693                    | -0.174776641                   | 2.466566286                                 | 0.413810362                  |
| 20.71284606                          | 0.830318444                    | -0.174316568                   | 1.732860742                                 | 0.508739415                  |
| 24.35656927                          | 0.82321049                     | -0.170490379                   | 1.804178262                                 | 0.505475266                  |
| 16.63795514                          | 0.745973996                    | -0.116505851                   | 2.378208886                                 | 0.413671539                  |
| 21.6941328                           | 0.876644897                    | -0.259365796                   | 1.035729209                                 | 0.652772929                  |
| 18.35021485                          | 0.870514412                    | -0.270996843                   | 0.862122737                                 | 0.689307942                  |
| 25.45499974                          | 0.835973304                    | -0.224615516                   | 1.032168226                                 | 0.675357226                  |
| 22.15424352                          | 0.820902384                    | -0.146919509                   | 3.386757471                                 | 0.356936812                  |
| 18.1076995                           | 0.747258942                    | -0.118981808                   | 2.499923369                                 | 0.411797554                  |
| 9.590687317                          | 0.731639598                    | -0.125016832                   | 2.146285985                                 | 0.442422621                  |
| 24.32298239                          | 0.763074662                    | -0.133392982                   | 2.382297088                                 | 0.420294986                  |
| 25.26994728                          | 0.850479965                    | -0.202512476                   | 1.537247149                                 | 0.562928526                  |
| 18.84118582                          | 0.925288735                    | -0.269003884                   | 3.416638826                                 | 0.354348139                  |
| 27.4070303                           | 0.838008726                    | -0.152738002                   | 3.017001976                                 | 0.385311868                  |
| 31.76184256                          | 0.846273576                    | -0.19988438                    | 1.592619516                                 | 0.574784799                  |
| 20.38423425                          | 0.995027408                    | -0.674214819                   | 4.949464104                                 | 0.263034647                  |
| 19.28577755                          | 0.830463711                    | -0.202133949                   | 1.199672901                                 | 0.611451657                  |
| 20.17557711                          | 0.700981303                    | -0.113406518                   | 1.69114782                                  | 0.520794496                  |
| 15.28767376                          | 0.762383451                    | -0.128245151                   | 2.390170749                                 | 0.411037226                  |
| 23.00997025                          | 0.823309178                    | -0.139344932                   | 3.782466205                                 | 0.330913787                  |
| 11.98220717                          | 0.953838625                    | -0.409244655                   | 2.657904405                                 | 0.386864217                  |
| 13.07539683                          | 0.984471446                    | -0.640950148                   | 4.265873016                                 | 0.287019429                  |
| 27.49623726                          | 0.866025038                    | -0.207927638                   | 1.711956797                                 | 0.548270193                  |
| 14.33735945                          | 0.857631934                    | -0.182324424                   | 2.744767266                                 | 0.381984956                  |
| 16.91329815                          | 0.841958936                    | -0.180693277                   | 2.225285571                                 | 0.45106786                   |
| 21.95283678                          | 0.887457283                    | -0.238993615                   | 1.34325088                                  | 0.579792918                  |
| 19.76979354                          | 0.866139746                    | -0.244840373                   | 1.042047316                                 | 0.64923596                   |
| 19.39820188                          | 0.987856                       | -0.496901276                   | 5.52616359                                  | 0.250905847                  |
| 21.8662158                           | 0.800313786                    | -0.131311526                   | 3.112240078                                 | 0.366935269                  |
| 11.86648245                          | 0.982361054                    | -0.647949379                   | 4.064934425                                 | 0.33830933                   |
| 27.47635605                          | 0.979981536                    | -0.382755854                   | 3.923427693                                 | 0.314214878                  |
| 21.12178589                          | 0.908678877                    | -0.238559594                   | 2.264336025                                 | 0.431528439                  |

| log.sigma.3.5.mm.3D_glcm_ClusterTendency | log.sigma.3.5.mm.3D_firstorder_InterquartileRange | log.sigma.3.5.mm.3D_firstorder_Skewness | log.sigma.3.5.mm.3D_firstorder_Uniformity |
|------------------------------------------|---------------------------------------------------|-----------------------------------------|-------------------------------------------|
| 43.87874693                              | 142.7502365                                       | -0.059035528                            | 0.07565166                                |
| 29.75625047                              | 115.3054247                                       | -0.653930882                            | 0.113274731                               |
| 27.62966393                              | 116.228035                                        | 0.544496478                             | 0.092661751                               |
| 45.46826712                              | 136.676815                                        | 0.167115114                             | 0.075925555                               |
| 78.03551656                              | 217.0460052                                       | 0.536037267                             | 0.060680325                               |
| 13.20522539                              | 72.22421265                                       | 0.491163216                             | 0.12392502                                |
| 11.92801345                              | 76.66165543                                       | -0.226554202                            | 0.135918367                               |
| 34.27675508                              | 128.4560242                                       | 0.514857673                             | 0.078500756                               |
| 245.6182757                              | 290.6214046                                       | 0.608657947                             | 0.04034103                                |
| 24.23455487                              | 94.08381844                                       | -0.240922925                            | 0.107523001                               |
| 16.31506323                              | 89.52767563                                       | 0.348035676                             | 0.104558058                               |
| 32.22370096                              | 113.8007126                                       | -0.009921412                            | 0.085477856                               |
| 20.64245012                              | 90.66135883                                       | 0.739964133                             | 0.104924232                               |
| 28.14889002                              | 111.3326893                                       | 0.777735447                             | 0.088304924                               |
| 33.44343128                              | 123.8041334                                       | 0.570519806                             | 0.079126917                               |
| 11.64152537                              | 21.79179847                                       | -1.850639699                            | 0.270838209                               |
| 35.33272018                              | 147.6453247                                       | 0.345789467                             | 0.0733717                                 |
| 25.00762694                              | 103.6696291                                       | 0.239513097                             | 0.095602448                               |
| 53.13457654                              | 189.4144268                                       | 0.570535581                             | 0.065873687                               |
| 24.65682246                              | 98.11464904                                       | -0.513700067                            | 0.121133307                               |
| 15.39454364                              | 80.895401                                         | -0.729140771                            | 0.161297154                               |
| 29.23443446                              | 104.454319                                        | 0.661465751                             | 0.089217833                               |
| 20.30696538                              | 88.04272103                                       | -0.909712803                            | 0.135065913                               |
| 134.3828292                              | 209.3676414                                       | -0.466799518                            | 0.05387529                                |
| 17.65431191                              | 84.34583759                                       | -0.431025622                            | 0.123209635                               |
| 28.88994402                              | 120.0471992                                       | -0.036161922                            | 0.087781238                               |
| 16.13437522                              | 68.71266747                                       | -0.194002365                            | 0.159057479                               |
| 19.77487578                              | 87.92013466                                       | -0.984348734                            | 0.202583741                               |
| 32.9013301                               | 118.6704797                                       | -0.897430538                            | 0.161330111                               |
| 33.30666424                              | 127.2706127                                       | -0.729312371                            | 0.114024636                               |
| 19.01010389                              | 90.51632357                                       | -0.625619772                            | 0.149539723                               |
| 16.10584951                              | 65.39450097                                       | -0.916602832                            | 0.188372612                               |
| 40.28902476                              | 143.5442562                                       | 0.020075108                             | 0.079463708                               |
| 38.68809295                              | 158.0194244                                       | 0.424400605                             | 0.12                                      |
| 69.27960364                              | 172.3704605                                       | 0.06976577                              | 0.064139713                               |
| 30.12571189                              | 121.2249603                                       | 0.063349244                             | 0.085936042                               |
| 20.4023107                               | 70.91752759                                       | -1.329628448                            | 0.200919171                               |
| 24.86399622                              | 103.3911347                                       | -0.13952892                             | 0.108763123                               |
| 59.67861571                              | 175.8063965                                       | 0.172631633                             | 0.064915907                               |
| 41.88831911                              | 150.8794632                                       | 0.095955666                             | 0.077390427                               |
| 37.86819116                              | 113.4086094                                       | -0.511423761                            | 0.087798914                               |
| 24.47507866                              | 104.178894                                        | 0.616235961                             | 0.091023071                               |
| 25.1361793                               | 106.2925892                                       | 0.144863332                             | 0.089190192                               |
| 34.92024072                              | 130.3872833                                       | 0.665227768                             | 0.078906813                               |
| 58.68621808                              | 123.6858177                                       | 0.719770794                             | 0.074878642                               |
| 10.60899003                              | 40.08886969                                       | -1.553293608                            | 0.253133258                               |
| 77.70183733                              | 132.1640377                                       | 1.44054482                              | 0.070441864                               |
| 19.96732858                              | 109.644886                                        | 0.587113698                             | 0.099915359                               |
| 36.0334274                               | 137.2052612                                       | -0.31585695                             | 0.08677686                                |
| 89.53441898                              | 226.3835354                                       | 0.002391925                             | 0.052355038                               |
| 21.14969052                              | 90.41861975                                       | -0.806494579                            | 0.159441561                               |
| 20.83978101                              | 100.2233734                                       | 0.671457747                             | 0.109445905                               |
| 35.95608842                              | 128.875092                                        | -0.397703639                            | 0.091299247                               |
| 34.1393645                               | 126.6970711                                       | 0.113778829                             | 0.08292922                                |
| 16.28946955                              | 36.06754959                                       | -1.455077845                            | 0.232651626                               |
| 37.41046157                              | 150.526268                                        | 0.194395201                             | 0.072719982                               |
| 46.33581517                              | 140.6028404                                       | 0.352404912                             | 0.069488574                               |
| 83.46539501                              | 185.9757404                                       | 0.029232094                             | 0.053793787                               |
| 37.16868767                              | 128.5399113                                       | 0.250846213                             | 0.078697054                               |
| 29.91521891                              | 111.5717659                                       | 0.315278013                             | 0.090782663                               |
| 31.29760659                              | 113.0369606                                       | 0.187752622                             | 0.093742398                               |
| 34.72263506                              | 108.5483962                                       | -0.331147563                            | 0.116932818                               |
| 16.36666963                              | 63.30953431                                       | -0.718269147                            | 0.151005852                               |
| 21.10725954                              | 96.36670923                                       | -0.530501268                            | 0.129373924                               |
| 36.30909864                              | 133.0678253                                       | -0.095671965                            | 0.095763617                               |
| 41.41645267                              | 129.6302841                                       | -0.165008671                            | 0.078712746                               |
| 42.87526559                              | 153.224762                                        | -0.127404839                            | 0.068480726                               |
| 43.03922232                              | 143.5216208                                       | -0.338729462                            | 0.097121993                               |
| 16.81309028                              | 95.79534149                                       | 0.929640731                             | 0.114088708                               |
| 29.41724456                              | 116.2119682                                       | -0.360943568                            | 0.095634616                               |
| 31.46633432                              | 123.0242805                                       | -0.376884571                            | 0.092887859                               |
| 25.88834972                              | 105.7927017                                       | 0.244033945                             | 0.0928461                                 |
| 21.24632021                              | 86.08210361                                       | -0.974998645                            | 0.163025128                               |
| 16.20586028                              | 64.39278059                                       | -1.214247081                            | 0.19660516                                |
| 16.82964695                              | 41.53049231                                       | -0.716226645                            | 0.209657266                               |
| 36.37847391                              | 131.5171013                                       | 0.401515454                             | 0.07412174                                |
| 22.64227017                              | 93.88818741                                       | 0.180540762                             | 0.097597338                               |
| 12.81255778                              | 71.68471909                                       | 1.157964708                             | 0.129703444                               |
| 31.45123505                              | 115.7277908                                       | -0.311945147                            | 0.08454849                                |
| 24.98102711                              | 111.2136033                                       | -0.407034836                            | 0.11826934                                |
| 35.33960177                              | 126.681778                                        | 0.340850552                             | 0.088689699                               |
| 51.57255938                              | 142.7319183                                       | 0.21543156                              | 0.069031374                               |
| 30.89149833                              | 89.01543903                                       | -0.803646794                            | 0.132087655                               |
| 46.74169053                              | 160.9379005                                       | -0.227289429                            | 0.086368366                               |
| 18.2825215                               | 82.1907993                                        | -0.690575962                            | 0.145363529                               |
| 17.75925662                              | 79.57811356                                       | 0.213484381                             | 0.118017499                               |
| 23.13696637                              | 102.5627213                                       | 0.549025305                             | 0.095605179                               |
| 52.41179097                              | 146.8230286                                       | 0.186432274                             | 0.064317236                               |
| 12.4715412                               | 79.26605606                                       | -0.205554546                            | 0.1272                                    |
| 25.32590073                              | 144.6663818                                       | -0.144265357                            | 0.159763314                               |
| 40.18834203                              | 125.73745                                         | -0.706151753                            | 0.110270495                               |
| 37.56036263                              | 132.3285065                                       | 0.707438091                             | 0.083578601                               |
| 25.69369229                              | 110.6497974                                       | -0.019904899                            | 0.094801683                               |
| 27.86184576                              | 109.6480442                                       | -0.561344975                            | 0.106877325                               |
| 19.48393119                              | 79.67038712                                       | -0.830961051                            | 0.167860313                               |
| 51.64530017                              | 178.1279907                                       | 0.552370856                             | 0.073318216                               |
| 49.24620689                              | 146.9853215                                       | 0.27568062                              | 0.067634083                               |
| 29.25204263                              | 172.1690273                                       | 0.048733803                             | 0.121527778                               |
| 82.46352321                              | 167.6420517                                       | 0.132180309                             | 0.057623546                               |
| 36.38453585                              | 110.0364447                                       | -0.370757881                            | 0.089005102                               |

| log.sigma.3.5.mm.3D_firstorder_MeanAbsoluteDeviation | log.sigma.3.5.mm.3D_firstorder_Energy | log.sigma.3.5.mm.3D_firstorder_RobustMeanAbsoluteDeviation | log.sigma.3.5.mm.3D_firstorder_Median |
|------------------------------------------------------|---------------------------------------|------------------------------------------------------------|---------------------------------------|
| 77.94702185                                          | 9844024.069                           | 58.9395157                                                 | -135.0272064                          |
| 62.12683609                                          | 17532698.54                           | 47.08793152                                                | -69.83512115                          |
| 64.272592                                            | 4773729.563                           | 46.05014809                                                | -150.9727936                          |
| 80.19632254                                          | 33702586.33                           | 55.71629258                                                | -77.27587128                          |
| 110.443338                                           | 5211062.222                           | 79.13147326                                                | -187.0727692                          |
| 46.75159115                                          | 9869776.857                           | 30.72831341                                                | -197.1124878                          |
| 47.33426521                                          | 1104337.636                           | 33.8083889                                                 | -106.6862717                          |
| 74.64925708                                          | 20080297.61                           | 50.87705417                                                | -207.6476746                          |
| 166.3326925                                          | 63778488.44                           | 122.5368673                                                | -98.88279343                          |
| 55.15700247                                          | 24222670.15                           | 37.9397932                                                 | -68.15634918                          |
| 55.19462675                                          | 14985098.38                           | 38.10755975                                                | -192.6993408                          |
| 66.41544617                                          | 12104157.99                           | 46.67506583                                                | -93.10427856                          |
| 56.49058676                                          | 18570138.39                           | 38.3823068                                                 | -99.41394806                          |
| 67.8790026                                           | 11779907.96                           | 46.71822416                                                | -132.8495789                          |
| 73.55174738                                          | 6323543.686                           | 51.97762655                                                | -101.5112495                          |
| 30.07041608                                          | 27133078.57                           | 12.17477712                                                | -3.592518687                          |
| 81.39364486                                          | 10491611.39                           | 60.42122423                                                | -194.4516907                          |
| 59.73880022                                          | 28459110.65                           | 43.15687735                                                | -113.3857994                          |
| 100.2415688                                          | 8551845.789                           | 74.5452711                                                 | -197.6236877                          |
| 55.53220172                                          | 18653011.7                            | 41.41481617                                                | -31.8156023                           |
| 45.63011545                                          | 31493504.21                           | 33.59154495                                                | -42.39294434                          |
| 66.16607757                                          | 14655658.87                           | 44.38379689                                                | -98.06343842                          |
| 49.92114148                                          | 23001142.85                           | 35.56964532                                                | -50.51668167                          |
| 123.945929                                           | 3493498.791                           | 89.9863497                                                 | -41.62876892                          |
| 48.32077729                                          | 9328603.396                           | 34.77697811                                                | -72.45152283                          |
| 64.74449061                                          | 10451750.78                           | 48.02862312                                                | -170.8566284                          |
| 44.00413324                                          | 12536199.33                           | 28.8456494                                                 | -34.89712906                          |
| 52.38859039                                          | 25851630.02                           | 38.19199955                                                | -20.99925423                          |
| 67.06122239                                          | 41735758.8                            | 49.97220197                                                | -35.60631561                          |
| 66.676789                                            | 24532403.55                           | 50.63870332                                                | -71.77558899                          |
| 50.53573589                                          | 29511778.68                           | 37.14333326                                                | -40.23314285                          |
| 43.83258122                                          | 43181706.77                           | 28.72631513                                                | -21.20712471                          |
| 76.46662009                                          | 25568583.14                           | 57.14062638                                                | -98.24407959                          |
| 98.0489308                                           | 730073.2445                           | 63.18126786                                                | -200.5856171                          |
| 102.147442                                           | 4909768.337                           | 71.8473717                                                 | -157.7610474                          |
| 66.75374754                                          | 32680307.79                           | 49.54000585                                                | -140.7973328                          |
| 49.66168203                                          | 35785462.02                           | 33.54862004                                                | -6.429241657                          |
| 58.74166113                                          | 23214675.04                           | 42.75905545                                                | -37.8708725                           |
| 95.58214725                                          | 8679251.601                           | 71.00321153                                                | -111.4354935                          |
| 77.88303791                                          | 15046030.86                           | 60.57344867                                                | -145.1487274                          |
| 67.22700566                                          | 9739327.644                           | 47.44303658                                                | -74.28351593                          |
| 66.01468684                                          | 16970728.48                           | 44.59196198                                                | -204.4936981                          |
| 63.17960355                                          | 29037668.53                           | 44.78485705                                                | -172.3760452                          |
| 75.38575187                                          | 17253470.64                           | 52.75689251                                                | -183.7635498                          |
| 78.81552145                                          | 23257144                              | 52.15950319                                                | -111.0990906                          |
| 34.43098359                                          | 16586620.31                           | 20.87128583                                                | -7.035186529                          |
| 86.70008806                                          | 47640374.87                           | 56.18680584                                                | -71.59477615                          |
| 62.41805973                                          | 10569280.33                           | 45.59838564                                                | -210.8293686                          |
| 88.18122872                                          | 1537677.464                           | 55.31775379                                                | -236.7105789                          |
| 124.4852311                                          | 8522915.765                           | 95.38251708                                                | -192.8478622                          |
| 52.75312995                                          | 28630064.86                           | 38.15570189                                                | -31.08843517                          |
| 58.27037735                                          | 20035816.01                           | 41.43857949                                                | -228.1013489                          |
| 68.7731675                                           | 44076046.7                            | 51.72079779                                                | -71.52080536                          |
| 68.82660077                                          | 4342626.737                           | 49.98964565                                                | -111.5373688                          |
| 40.16599979                                          | 42019731.48                           | 21.26091058                                                | -5.804852962                          |
| 80.73188312                                          | 16223115.22                           | 58.78862866                                                | -197.2002258                          |
| 83.92839588                                          | 39239930.9                            | 57.93090963                                                | -194.1949844                          |
| 109.3120929                                          | 22664793.4                            | 79.995045                                                  | -175.0675735                          |
| 73.56146117                                          | 9124973.82                            | 52.6456819                                                 | -136.0818329                          |
| 62.79533099                                          | 7050869.421                           | 44.93579429                                                | -103.3659096                          |
| 62.97355405                                          | 31497970.17                           | 46.60526159                                                | -136.4823608                          |
| 66.60182623                                          | 69360470.11                           | 46.08089925                                                | -32.67551613                          |
| 43.66405052                                          | 14995830.63                           | 28.40652784                                                | -9.064682961                          |
| 52.38022087                                          | 11491977.32                           | 39.64773094                                                | -34.6978569                           |
| 78.67593431                                          | 2867181.795                           | 57.37966113                                                | -223.5356445                          |
| 74.27503706                                          | 13129446.68                           | 53.37167892                                                | -45.66282654                          |
| 85.91836826                                          | 6793938.486                           | 61.05602633                                                | -233.737793                           |
| 76.05405087                                          | 47650842.9                            | 58.59560337                                                | -54.37155914                          |
| 57.46131602                                          | 9727051.198                           | 37.74998047                                                | -262.9091187                          |
| 62.78979509                                          | 21393601.41                           | 46.91352288                                                | -73.17987442                          |
| 64.67468038                                          | 34284686.97                           | 48.56127807                                                | -78.17290497                          |
| 60.87397772                                          | 20718083.61                           | 43.55752579                                                | -179.0600433                          |
| 51.62136613                                          | 41407869.19                           | 37.38685657                                                | -15.62895679                          |
| 44.69355066                                          | 47433430.37                           | 29.76326586                                                | -9.715339184                          |
| 40.12433593                                          | 53780009.55                           | 21.29206511                                                | -2.604987383                          |
| 78.56392454                                          | 21551289.3                            | 53.79528104                                                | -203.5038834                          |
| 59.25549568                                          | 17139891.47                           | 40.15509663                                                | -183.7507935                          |
| 48.00714617                                          | 10681531.71                           | 30.9386673                                                 | -219.3205185                          |
| 67.37315458                                          | 30707092.12                           | 46.9796827                                                 | -157.5995941                          |
| 59.1678951                                           | 28941716.44                           | 44.04860185                                                | -63.89488983                          |
| 75.3374126                                           | 13018415.35                           | 52.7438328                                                 | -298.8262024                          |
| 84.27724583                                          | 21792040.03                           | 57.4220856                                                 | -123.3087463                          |
| 60.75622075                                          | 37638061.26                           | 39.8593363                                                 | -12.36737347                          |
| 94.64191335                                          | 1164999.798                           | 72.73671267                                                | -152.933197                           |
| 48.56800679                                          | 28881253.67                           | 34.71624962                                                | -30.17945194                          |
| 48.8874896                                           | 24796040.21                           | 33.03176766                                                | -54.61899567                          |
| 60.91387686                                          | 12183995.93                           | 43.61204807                                                | -174.2719269                          |
| 89.27863615                                          | 39235899.3                            | 61.44646413                                                | -238.0256195                          |
| 48.08680092                                          | 460835.0733                           | 34.84204515                                                | -73.3564415                           |
| 77.35078024                                          | 724279.9652                           | 58.63665658                                                | -251.5312805                          |
| 70.70273911                                          | 41943388.37                           | 52.28912884                                                | -47.72273254                          |
| 76.50814552                                          | 12664301.73                           | 55.68035953                                                | -204.0877914                          |
| 61.46233637                                          | 6225396.038                           | 44.28120192                                                | -92.81403351                          |
| 60.13034793                                          | 34395944.13                           | 44.81748018                                                | -54.08770943                          |
| 50.34313427                                          | 40250254.3                            | 35.32953274                                                | -15.75812721                          |
| 106.3707192                                          | 4415170.071                           | 75.77663256                                                | -259.3493042                          |
| 84.85770038                                          | 13798571.92                           | 60.4961697                                                 | -97.26994324                          |
| 73.14004678                                          | 1139580.691                           | 52.54901537                                                | -195.8573685                          |
| 105.7061929                                          | 5106805.128                           | 74.56081849                                                | -127.1395493                          |
| 69.19867419                                          | 4846737.614                           | 48.06808752                                                | -86.66793823                          |

| log.sigma.3.5.mm.3D_firstorder_TotalEnergy | log.sigma.3.5.mm.3D_firstorder_Maximum | log.sigma.3.5.mm.3D_firstorder_RootMeanSquared | log.sigma.3.5.mm.3D_firstorder_90Percentile | log.sigma.3.5.mm.3D_firstorder_Minimum |
|--------------------------------------------|----------------------------------------|------------------------------------------------|---------------------------------------------|----------------------------------------|
| 265788649.9                                | 99.49091339                            | 165.1325672                                    | -17.80395699                                | -401.6583252                           |
| 473382860.6                                | 74.36412048                            | 111.7880929                                    | -2.914870882                                | -338.625061                            |
| 128890698.2                                | 114.2257996                            | 164.2261353                                    | -45.9411377                                 | -292.4653931                           |
| 909969831                                  | 355.5653992                            | 132.0430927                                    | 24.45160141                                 | -379.2746277                           |
| 140698680                                  | 193.7959442                            | 227.1446136                                    | -31.32030296                                | -413.664032                            |
[truncated: 7,133,495 more chars]
