# Supplementary material for: Peritumoral radiomics features predict distant metastasis in locally advanced NSCLC
Source: PLoS One. 2018 Nov 2;13(11):e0206108. doi: 10.1371/journal.pone.0206108 (PMC6214508; doi:10.1371/journal.pone.0206108)
Supplement: S8 File — (PDF) [file pone.0206108.s008.pdf]

X      general\_info\_BoundingBox  
97 (6, 5, 6, 20, 16, 11)  
98 (5, 6, 6, 9, 8, 6)  
99 (6, 6, 6, 11, 14, 13)  
100 (6, 6, 6, 8, 8, 7)  
102 (6, 6, 5, 15, 16, 14)  
103 (5, 6, 6, 9, 7, 8)  
104 (6, 5, 6, 37, 36, 41)  
105 (6, 6, 6, 22, 35, 33)  
106 (6, 6, 6, 24, 31, 26)  
109 (5, 6, 6, 16, 14, 13)  
110 (6, 5, 6, 19, 36, 20)  
111 (5, 6, 6, 19, 23, 27)  
113 (6, 6, 6, 14, 14, 9)  
115 (5, 5, 5, 13, 14, 10)  
116 (6, 5, 6, 17, 14, 15)  
118 (6, 6, 6, 28, 41, 30)  
119 (6, 6, 5, 12, 12, 13)  
120 (5, 6, 6, 9, 9, 10)  
121 (6, 5, 6, 13, 17, 11)  
122 (6, 6, 5, 35, 34, 41)  
123 (5, 6, 6, 15, 17, 21)  
124 (6, 6, 5, 10, 14, 8)  
125 (6, 6, 5, 10, 10, 11)  
127 (6, 6, 6, 26, 29, 18)  
128 (6, 6, 6, 12, 20, 12)  
129 (6, 5, 6, 17, 18, 23)  
130 (5, 6, 6, 20, 24, 19)  
131 (5, 6, 5, 19, 20, 22)  
132 (5, 5, 6, 8, 6, 5)  
133 (6, 6, 6, 17, 18, 12)  
134 (6, 5, 6, 25, 25, 24)  
137 (5, 6, 6, 10, 12, 14)  
210 (6, 6, 5, 15, 26, 25)  
310 (6, 5, 5, 22, 27, 19)  
410 (6, 6, 6, 27, 26, 35)  
510 (6, 6, 6, 17, 22, 19)  
610 (6, 5, 6, 22, 24, 19)  
710 (6, 5, 6, 24, 34, 42)  
810 (5, 6, 6, 14, 10, 9)  
910 (5, 5, 5, 31, 47, 41)  
1010 (6, 6, 6, 15, 13, 15)  
1110 (6, 5, 6, 33, 30, 29)  
1210 (5, 5, 6, 27, 28, 12)  
138 (5, 6, 6, 14, 19, 15)  
142 (5, 6, 6, 16, 16, 16)  
151 (5, 6, 5, 20, 28, 15)  
161 (5, 5, 5, 31, 30, 28)  
171 (6, 5, 6, 12, 9, 8)  
181 (6, 6, 5, 12, 9, 6)  
191 (6, 6, 6, 11, 8, 8)  
201 (6, 6, 6, 18, 25, 25)  
221 (6, 5, 5, 23, 23, 24)  
231 (6, 5, 6, 33, 41, 27)  
241 (6, 5, 6, 15, 19, 16)  
251 (6, 6, 6, 9, 15, 10)  
261 (6, 5, 6, 14, 15, 12)  
271 (6, 6, 6, 27, 35, 23)  
281 (6, 6, 5, 14, 17, 18)  
291 (6, 5, 6, 13, 12, 13)  
301 (6, 5, 5, 38, 42, 44)  
311 (6, 6, 5, 13, 15, 15)  
321 (6, 6, 5, 17, 23, 18)  
331 (6, 6, 5, 31, 42, 40)  
341 (6, 6, 6, 18, 18, 21)  
351 (5, 6, 6, 10, 12, 13)  
361 (6, 6, 6, 23, 22, 23)  
371 (5, 6, 6, 9, 11, 8)  
381 (6, 6, 6, 24, 33, 39)  
391 (6, 6, 5, 31, 28, 32)  
401 (5, 6, 6, 23, 19, 16)  
411 (6, 5, 5, 13, 13, 7)  
421 (6, 6, 5, 26, 26, 32)  
431 (5, 6, 6, 14, 16, 14)  
481 (6, 6, 6, 13, 15, 20)  
491 (6, 6, 6, 23, 31, 32)  
501 (6, 6, 6, 17, 8, 13)  
541 (5, 6, 6, 18, 18, 19)  
551 (5, 5, 6, 9, 9, 7)  
561 (6, 6, 5, 21, 12, 14)  
601 (5, 5, 5, 17, 17, 18)  
611 (6, 5, 6, 20, 16, 11)  
621 (6, 5, 6, 11, 12, 13)  
641 (5, 6, 6, 15, 23, 27)  
661 (5, 5, 6, 19, 19, 19)  
681 (6, 6, 6, 15, 21, 24)  
691 (5, 6, 5, 11, 10, 11)  
701 (5, 6, 6, 17, 21, 10)  
711 (6, 5, 5, 25, 27, 23)  
721 (5, 6, 6, 19, 15, 14)  
751 (5, 5, 6, 16, 15, 12)  
771 (6, 6, 5, 11, 12, 14)  
781 (5, 6, 5, 23, 24, 16)  
791 (6, 6, 6, 30, 25, 29)  
801 (6, 5, 6, 24, 28, 20)  
811 (6, 5, 6, 28, 31, 23)  
821 (6, 6, 5, 21, 19, 22)  
841 (6, 6, 5, 20, 17, 19)  
861 (5, 6, 5, 9, 8, 6)  
871 (5, 5, 6, 8, 9, 6)  
901 (6, 5, 6, 33, 40, 32)







| original_shape_SurfaceVolumeRatio | original_shape_Volume | original_shape_SphericalDisproportion | original_shape_Flatness | original_shape_SurfaceArea | original_shape_Maximum2DDiameterColumn |
|-----------------------------------|-----------------------|---------------------------------------|-------------------------|----------------------------|----------------------------------------|
| 0.248942482                       | 38988                 | 1.745521526                           | 1.32131834              | 9705.769469                | 57.70615219                            |
| 0.292366996                       | 9369                  | 1.274506245                           | 1.26310296              | 2739.186389                | 26.83281573                            |
| 0.279416737                       | 24084                 | 1.668570261                           | 1.133980807             | 6729.472701                | 41.67733197                            |
| 0.27348608                        | 8694                  | 1.162851652                           | 1.100408429             | 2377.687981                | 25.8069758                             |
| 0.237710075                       | 38097                 | 1.653967825                           | 1.052779924             | 9056.040722                | 45.79301257                            |
| 0.306567903                       | 6534                  | 1.185138032                           | 1.251817147             | 2003.114677                | 27.65863337                            |
| 0.258456273                       | 284553                | 3.51525911                            | 1.257381277             | 73544.50785                | 123.3288287                            |
| 0.24235579                        | 163836                | 2.742241633                           | 1.50733222              | 39706.60316                | 98.27003612                            |
| 0.270632605                       | 115074                | 2.722001732                           | 1.24148674              | 31142.77643                | 79.25906888                            |
| 0.286649968                       | 20385                 | 1.619215596                           | 1.758793889             | 5843.359594                | 43.68065934                            |
| 0.345530176                       | 42012                 | 2.483855397                           | 1.182684101             | 14516.41375                | 50.91168825                            |
| 0.259885261                       | 91989                 | 2.425918233                           | 1.171926938             | 23906.58532                | 83.57032966                            |
| 0.252677857                       | 21897                 | 1.461766257                           | 1.117120229             | 5532.887024                | 36.61966685                            |
| 0.252959217                       | 17388                 | 1.355136141                           | 1.460836537             | 4398.454867                | 36.49657518                            |
| 0.249598655                       | 42525                 | 1.801521947                           | 1.171970989             | 10614.18281                | 51.26402247                            |
| 0.308132916                       | 155574                | 3.426885881                           | 1.270073914             | 47937.47028                | 83.57032966                            |
| 0.259346254                       | 23841                 | 1.543490678                           | 1.25442987              | 6183.074043                | 40.80441153                            |
| 0.26055199                        | 11043                 | 1.199791998                           | 1.116048744             | 2877.275627                | 32.44996148                            |
| 0.256269367                       | 29538                 | 1.638096946                           | 1.141003613             | 7569.684565                | 38.41874542                            |
| 0.252648345                       | 247941                | 3.282074613                           | 1.17721487              | 62641.88337                | 135.8307771                            |
| 0.245547301                       | 56106                 | 1.943811479                           | 1.134659952             | 13776.67686                | 64.62197769                            |
| 0.280376777                       | 13392                 | 1.376806985                           | 1.299111368             | 3754.805791                | 28.3019434                             |
| 0.290239512                       | 15066                 | 1.482307814                           | 1.278214987             | 4372.748484                | 33.54101966                            |
| 0.320067948                       | 97119                 | 3.042235258                           | 1.51149395              | 31084.67906                | 84.05355436                            |
| 0.270200225                       | 33156                 | 1.794963514                           | 1.144517705             | 8958.758653                | 38.41874542                            |
| 0.254105353                       | 69012                 | 2.155284278                           | 1.068473667             | 17536.31863                | 71.11961755                            |
| 0.236466965                       | 54108                 | 1.849439718                           | 1.25053173              | 12794.75455                | 54.08326913                            |
| 0.276667157                       | 60831                 | 2.249996283                           | 1.223465879             | 16829.9398                 | 66.40783086                            |
| 0.352956045                       | 3942                  | 1.152945308                           | 1.289852239             | 1391.352729                | 22.84731932                            |
| 0.27218719                        | 43470                 | 1.97900445                            | 1.421781259             | 11831.97715                | 53.66563146                            |
| 0.243277558                       | 108243                | 2.397459044                           | 1.217621403             | 26333.09272                | 71.30918594                            |
| 0.25165924                        | 21276                 | 1.441978385                           | 1.424368985             | 5354.301993                | 42.95346319                            |
| 0.252338029                       | 63045                 | 2.076740017                           | 1.812764415             | 15908.65103                | 64.62197769                            |
| 0.36369472                        | 65205                 | 3.027005233                           | 1.343811122             | 23714.71424                | 68.41052551                            |
| 0.240658838                       | 138591                | 2.575309126                           | 1.210229159             | 33353.149                  | 109.2016483                            |
| 0.260497099                       | 52353                 | 2.015112469                           | 1.136831998             | 13637.8046                 | 51.26402247                            |
| 0.238005064                       | 40824                 | 1.694626232                           | 2.674490328             | 9716.318733                | 64.76109943                            |
| 0.311499183                       | 157167                | 3.476107842                           | 1.600708637             | 48957.39204                | 128.1600562                            |
| 0.260843774                       | 15120                 | 1.333767962                           | 1.221889564             | 3943.957863                | 40.80441153                            |
| 0.28653399                        | 255069                | 3.757606079                           | 1.241249781             | 73085.93835                | 119.4738465                            |
| 0.23447666                        | 36180                 | 1.603633117                           | 1.125187575             | 8483.365576                | 49.92995093                            |
| 0.293117221                       | 153144                | 3.242827686                           | 1.328047882             | 44889.1437                 | 98.4073168                             |
| 0.288329391                       | 65286                 | 2.400738244                           | 2.626425359             | 18823.87264                | 80.77747211                            |
| 0.248462124                       | 38340                 | 1.732447587                           | 1.111208887             | 9526.037819                | 44.59820624                            |
| 0.264569116                       | 42012                 | 1.901864072                           | 1.269469178             | 11115.07771                | 57.62811814                            |
| 0.275309882                       | 64827                 | 2.286948144                           | 1.173896748             | 17847.51372                | 55.31726674                            |
| 0.286987609                       | 144477                | 3.113952086                           | 1.073743921             | 41463.10872                | 91.24143795                            |
| 0.292397548                       | 13257                 | 1.430994685                           | 1.161053059             | 3876.314295                | 34.20526275                            |
| 0.284418787                       | 10557                 | 1.290191954                           | 1.520580678             | 3002.609133                | 34.20526275                            |
| 0.289352734                       | 12204                 | 1.377561083                           | 1.150941425             | 3531.260764                | 33.54101966                            |
| 0.338716187                       | 34749                 | 2.285594928                           | 1.95592319              | 11770.04877                | 65.7951366                             |
| 0.256420936                       | 75195                 | 2.238028832                           | 1.285185003             | 19281.57225                | 77.82673063                            |
| 0.253980822                       | 215352                | 3.147988255                           | 1.313298895             | 54695.278                  | 96.60745313                            |
| 0.254420317                       | 44334                 | 1.862001263                           | 1.649297111             | 11279.47035                | 53.41348144                            |
| 0.28145316                        | 17361                 | 1.507001152                           | 1.139818311             | 4886.308319                | 29.54657341                            |
| 0.259035175                       | 31752                 | 1.696152824                           | 1.19335891              | 8224.884881                | 44.59820624                            |
| 0.282687021                       | 108405                | 2.787221707                           | 1.234972838             | 30644.68649                | 81.88406438                            |
| 0.244626726                       | 55809                 | 1.933100912                           | 1.221521085             | 13652.37296                | 55.15432893                            |
| 0.252564409                       | 20601                 | 1.431695938                           | 1.309090713             | 5203.079383                | 46.86149806                            |
| 0.265285495                       | 294111                | 3.648097771                           | 1.456589618             | 78023.38214                | 133.1540461                            |
| 0.269555459                       | 35883                 | 1.838485696                           | 1.247840701             | 9672.458535                | 48.37354649                            |
| 0.240693398                       | 66555                 | 2.017004883                           | 1.093114314             | 16019.34911                | 55.15432893                            |
| 0.224779423                       | 222318                | 2.815770811                           | 1.465810331             | 49972.51169                | 106.5316854                            |
| 0.230407459                       | 56592                 | 1.82921221                            | 1.059523994             | 13039.21895                | 63.5688603                             |
| 0.280707804                       | 18279                 | 1.529048193                           | 1.287184813             | 5131.057958                | 40.24922359                            |
| 0.229735445                       | 92367                 | 2.147415884                           | 1.196432573             | 21219.97386                | 71.30918594                            |
| 0.261978344                       | 10962                 | 1.203403306                           | 1.152530159             | 2871.806605                | 25.8069758                             |
| 0.253595269                       | 137295                | 2.705257413                           | 1.363896662             | 34817.3624                 | 109.4897255                            |
| 0.243468529                       | 202716                | 2.957477051                           | 1.135491109             | 49354.96632                | 103.3150521                            |
| 0.261199355                       | 57348                 | 2.08286314                            | 1.16647844              | 14979.26061                | 66.2721661                             |
| 0.305094947                       | 13284                 | 1.494148784                           | 1.595150367             | 4052.881273                | 36.24913792                            |
| 0.293707404                       | 134487                | 3.111650935                           | 1.081495633             | 39499.82762                | 96.04686356                            |
| 0.250325114                       | 36045                 | 1.709891846                           | 1.071876137             | 9022.96873                 | 44.59820624                            |
| 0.367195704                       | 25650                 | 2.239284411                           | 1.393779454             | 9418.569805                | 57.70615219                            |
| 0.262194808                       | 110268                | 2.599898911                           | 1.220040302             | 28911.69708                | 88.84255737                            |
| 0.306223005                       | 24786                 | 1.846244314                           | 1.785407744             | 7590.043393                | 51.26402247                            |
| 0.244244981                       | 59643                 | 1.973307127                           | 1.309312202             | 14567.50343                | 59.09314681                            |
| 0.271720903                       | 8721                  | 1.156540965                           | 1.145741282             | 2369.677995                | 28.3019434                             |
| 0.252754185                       | 35505                 | 1.717819007                           | 1.224322998             | 8974.037353                | 60.29925373                            |
| 0.276118193                       | 48600                 | 2.083641445                           | 1.11941916              | 13419.34416                | 55.80322571                            |
| 0.250692483                       | 37962                 | 1.742235596                           | 1.31219352              | 9516.788048                | 57.70615219                            |
| 0.275546819                       | 22302                 | 1.603833257                           | 1.043489467             | 6145.245163                | 40.24922359                            |
| 0.320795976                       | 61614                 | 2.620019897                           | 1.793850284             | 19765.52329                | 80.04998438                            |
| 0.245655546                       | 51111                 | 1.885155769                           | 1.244068553             | 12555.70061                | 55.31726674                            |
| 0.244484878                       | 73305                 | 2.115821749                           | 1.439215601             | 17921.96398                | 76.4852927                             |
| 0.274406271                       | 14337                 | 1.37846582                            | 1.042969389             | 3934.162701                | 33.9411255                             |
| 0.271011711                       | 35316                 | 1.838630396                           | 1.383309498             | 9571.049568                | 49.47726751                            |
| 0.260099641                       | 103572                | 2.525823987                           | 1.144462745             | 26939.04007                | 78.23042886                            |
| 0.263250881                       | 45927                 | 1.949433392                           | 1.141741939             | 12090.3232                 | 64.89992296                            |
| 0.252685546                       | 36909                 | 1.739697348                           | 1.1135441               | 9326.370802                | 48.46648326                            |
| 0.238842633                       | 21708                 | 1.377741254                           | 1.1717533               | 5184.795869                | 44.29446918                            |
| 0.246524811                       | 68364                 | 2.084422078                           | 1.837381731             | 16853.42215                | 68.41052551                            |
| 0.263966535                       | 121527                | 2.703682394                           | 1.077919052             | 32079.06111                | 92.66067127                            |
| 0.28513517                        | 93042                 | 2.671732724                           | 1.256148118             | 26529.54648                | 69.26037828                            |
| 0.247576338                       | 89289                 | 2.288184271                           | 1.445319773             | 22105.84361                | 91.24143795                            |
| 0.227045344                       | 64368                 | 1.881561775                           | 1.169336941             | 14614.45473                | 64.76109943                            |
| 0.239285556                       | 66204                 | 2.001675943                           | 1.449681626             | 15841.66095                | 65.7951366                             |
| 0.277424574                       | 8451                  | 1.16850391                            | 1.197876656             | 2344.515072                | 25.8069758                             |
| 0.291934441                       | 7236                  | 1.16761786                            | 1.200441278             | 2112.437617                | 24.18677324                            |
| 0.236555613                       | 238248                | 3.032440031                           | 1.241176171             | 56358.90172                | 114.0394669                            |

| original_shape_Maximum2DDiameterRow | log.sigma.5.0.mm.3D_gldm_GrayLevelVariance | log.sigma.5.0.mm.3D_gldm_HighGrayLevelEmphasis | log.sigma.5.0.mm.3D_gldm_GrayLevelNonUniformityNormalized |
|-------------------------------------|--------------------------------------------|------------------------------------------------|-----------------------------------------------------------|
| 51.6139516                          | 37.88614076                                | 303.0526316                                    | 0.045254602                                               |
| 25.8069758                          | 40.09241834                                | 379.0979827                                    | 0.047396789                                               |
| 48.83646179                         | 36.33177195                                | 353.8665919                                    | 0.046140079                                               |
| 23.43074903                         | 42.02361984                                | 339.8540373                                    | 0.047201111                                               |
| 46.57252409                         | 31.3831689                                 | 204.0885897                                    | 0.049803583                                               |
| 23.43074903                         | 38.52272727                                | 295.9793388                                    | 0.045522847                                               |
| 138.9748179                         | 17.2872166                                 | 138.3206187                                    | 0.083364577                                               |
| 106.4048871                         | 27.10866399                                | 256.250824                                     | 0.057550681                                               |
| 102.6157883                         | 22.09600607                                | 158.7587987                                    | 0.068301696                                               |
| 53.07541804                         | 25.0746476                                 | 188.1695364                                    | 0.05508004                                                |
| 116.7304588                         | 10.61030359                                | 95.80462725                                    | 0.093919549                                               |
| 82.54089895                         | 17.68184272                                | 148.9917816                                    | 0.075893835                                               |
| 37.10795063                         | 39.29719136                                | 335.298397                                     | 0.046902866                                               |
| 45.79301257                         | 45.01377985                                | 333.5388199                                    | 0.043439682                                               |
| 49.92995093                         | 25.81329302                                | 159.1974603                                    | 0.057378685                                               |
| 134.1640786                         | 24.30438184                                | 181.7280458                                    | 0.063243111                                               |
| 42.42640687                         | 12.79587374                                | 99.81540204                                    | 0.0777804099                                              |
| 32.44996148                         | 46.3279153                                 | 333.7506112                                    | 0.042963636                                               |
| 48.46648326                         | 11.37627294                                | 95.24771481                                    | 0.092831432                                               |
| 121.823643                          | 24.37555322                                | 719.8000653                                    | 0.060727469                                               |
| 62.64183905                         | 29.14847071                                | 207.033205                                     | 0.052120339                                               |
| 39.11521443                         | 26.65322581                                | 282.6532258                                    | 0.061532583                                               |
| 36.61966685                         | 27.19681145                                | 223.6989247                                    | 0.054842564                                               |
| 85.38149682                         | 11.71587403                                | 128.1061996                                    | 0.102021276                                               |
| 57.70615219                         | 33.97288831                                | 328.9283388                                    | 0.04998992                                                |
| 72.49827584                         | 31.584952                                  | 242.6185446                                    | 0.05191167                                                |
| 64.89992296                         | 31.375126                                  | 282.8602794                                    | 0.050803582                                               |
| 65.520989                           | 17.79408587                                | 152.3870395                                    | 0.066029631                                               |
| 17.49285568                         | 10.73616063                                | 124.0273973                                    | 0.090542316                                               |
| 53.66563146                         | 21.50397786                                | 177.1024845                                    | 0.061630338                                               |
| 89.49860334                         | 26.51619227                                | 190.1187329                                    | 0.055434079                                               |
| 45.79301257                         | 32.33724619                                | 312.8997462                                    | 0.050223531                                               |
| 77.12976079                         | 28.40357909                                | 235.640257                                     | 0.055619678                                               |
| 82.54089895                         | 21.15027901                                | 205.5925466                                    | 0.062224108                                               |
| 105.5130324                         | 23.19527758                                | 188.3826222                                    | 0.061356159                                               |
| 80.72174428                         | 30.76574671                                | 291.1578133                                    | 0.050767331                                               |
| 83.40863265                         | 35.27884858                                | 389.3756614                                    | 0.049589177                                               |
| 132.849539                          | 26.27870171                                | 248.0793678                                    | 0.071023554                                               |
| 29.54657341                         | 18.20956314                                | 175.3089286                                    | 0.069387755                                               |
| 155.2191998                         | 17.59284268                                | 332.9926961                                    | 0.075512599                                               |
| 45.79301257                         | 32.25118011                                | 225.5649254                                    | 0.048631098                                               |
| 112.6099463                         | 9.138126087                                | 173.942701                                     | 0.115255376                                               |
| 84.69356528                         | 39.65525652                                | 327.7841191                                    | 0.044370146                                               |
| 66.06814664                         | 31.9596826                                 | 210.1633803                                    | 0.049104344                                               |
| 51                                  | 16.79912074                                | 165.2442159                                    | 0.084112582                                               |
| 80.77747211                         | 29.18107702                                | 234.5618492                                    | 0.051194655                                               |
| 91.43850392                         | 18.05502766                                | 215.5176603                                    | 0.06739711                                                |
| 30                                  | 15.51847719                                | 124.0855397                                    | 0.075397895                                               |
| 28.3019434                          | 28.33631387                                | 170.0741688                                    | 0.056952793                                               |
| 25.8069758                          | 27.0099998                                 | 255.0066372                                    | 0.055172684                                               |
| 84.95881355                         | 31.47654538                                | 195.9417249                                    | 0.051916572                                               |
| 74.09453421                         | 29.25433906                                | 315.4775583                                    | 0.052337187                                               |
| 125.2836781                         | 10.60142105                                | 134.2582748                                    | 0.118383014                                               |
| 55.80322571                         | 17.04147559                                | 222.5499391                                    | 0.07264024                                                |
| 45.79301257                         | 49.7408967                                 | 390.2954899                                    | 0.040718444                                               |
| 42.95346319                         | 32.57579018                                | 211.079932                                     | 0.047782463                                               |
| 107.3312629                         | 22.55443296                                | 185.4966376                                    | 0.061547962                                               |
| 56.60388679                         | 28.06260379                                | 230.2883406                                    | 0.051981643                                               |
| 38.18376618                         | 24.56439281                                | 264.4285714                                    | 0.057229086                                               |
| 159.0282994                         | 14.51440484                                | 196.4138438                                    | 0.092892516                                               |
| 50.91168825                         | 23.75425437                                | 207.2558315                                    | 0.059170294                                               |
| 78.23042886                         | 36.59026517                                | 367.5054767                                    | 0.046468161                                               |
| 138.0326048                         | 30.55186831                                | 389.639179                                     | 0.052198893                                               |
| 65.7951366                          | 31.26858661                                | 296.4642176                                    | 0.05226695                                                |
| 40.36087214                         | 20.22742179                                | 151.47711049                                   | 0.060792575                                               |
| 70.29224708                         | 31.17516268                                | 357.378252                                     | 0.05052045                                                |
| 31.32091953                         | 31.59465772                                | 298.1847291                                    | 0.056346915                                               |
| 118.6802427                         | 25.99001958                                | 256.0088496                                    | 0.058086937                                               |
| 98.68130522                         | 17.64324561                                | 186.4286095                                    | 0.069013865                                               |
| 60                                  | 24.7036044                                 | 257.6252354                                    | 0.056314082                                               |
| 31.32091953                         | 28.34561108                                | 175.7804878                                    | 0.053423888                                               |
| 93.77099765                         | 26.83038123                                | 221.7918089                                    | 0.060853246                                               |
| 47.4341649                          | 36.39093493                                | 212.693633                                     | 0.046766822                                               |
| 64.41273166                         | 20.19825485                                | 136.2705263                                    | 0.062255956                                               |
| 111.6064514                         | 21.18562034                                | 211.7526934                                    | 0.072564179                                               |
| 40.24922359                         | 14.69914349                                | 101.1405229                                    | 0.071646233                                               |
| 63.28506933                         | 25.30871875                                | 256.3377094                                    | 0.055236603                                               |
| 25.63201124                         | 41.83590373                                | 482.7058824                                    | 0.053091662                                               |
| 42.95346319                         | 25.2917891                                 | 252.3726236                                    | 0.055334037                                               |
| 55.80322571                         | 15.20222222                                | 167.3133333                                    | 0.073364815                                               |
| 51.6139516                          | 37.68899848                                | 298.559744                                     | 0.045408926                                               |
| 41.67733197                         | 26.50349272                                | 285.027845                                     | 0.056144434                                               |
| 85.90692638                         | 23.87143007                                | 161.5788782                                    | 0.058190418                                               |
| 61.77378085                         | 16.5868871                                 | 160.0295827                                    | 0.069780538                                               |
| 75.23961722                         | 23.62192227                                | 195.6906077                                    | 0.065466866                                               |
| 32.31098884                         | 34.33189696                                | 512.3841808                                    | 0.066197098                                               |
| 60.29925373                         | 23.44292474                                | 203.9220183                                    | 0.05717579                                                |
| 80.04998438                         | 20.92263968                                | 172.7145464                                    | 0.080019186                                               |
| 44.59820624                         | 17.92267301                                | 174.7095826                                    | 0.06906509                                                |
| 51.0881591                          | 32.18676195                                | 212.0841258                                    | 0.049488706                                               |
| 45.79301257                         | 34.17024331                                | 440.3631841                                    | 0.051601446                                               |
| 74.09453421                         | 18.37615707                                | 229.0616114                                    | 0.072721612                                               |
| 86.37708029                         | 17.97550629                                | 235.6445234                                    | 0.066777182                                               |
| 78.74642849                         | 23.6587362                                 | 194.9677887                                    | 0.059223998                                               |
| 88.84255737                         | 14.17859213                                | 160.1155125                                    | 0.072893823                                               |
| 71.11961755                         | 43.47002387                                | 313.0687919                                    | 0.041783028                                               |
| 63.28506933                         | 28.43668234                                | 184.9416803                                    | 0.051431531                                               |
| 24.18677324                         | 25.61355123                                | 261.1821086                                    | 0.060743705                                               |
| 26.83281573                         | 15.98144074                                | 170.0932836                                    | 0.076603921                                               |
| 126.4634335                         | 26.09250773                                | 328.7081822                                    | 0.055206058                                               |

| log.sigma.5.0.mm.3D_gldm_DependenceEntropy | log.sigma.5.0.mm.3D_gldm_DependenceNonUniformity | log.sigma.5.0.mm.3D_gldm_GrayLevelNonUniformity | log.sigma.5.0.mm.3D_gldm_SmallDependenceEmphasis |
|--------------------------------------------|--------------------------------------------------|-------------------------------------------------|--------------------------------------------------|
| 6.867788829                                | 308.1204986                                      | 65.34764543                                     | 0.308164884                                      |
| 6.238583976                                | 87.81268012                                      | 16.44668588                                     | 0.361809158                                      |
| 6.700300135                                | 197.6188341                                      | 41.15695067                                     | 0.304520653                                      |
| 6.135573954                                | 93.35403727                                      | 15.19875776                                     | 0.380543021                                      |
| 6.701157409                                | 327.6888731                                      | 70.27285613                                     | 0.257206811                                      |
| 6.142387893                                | 61.65289256                                      | 11.01652893                                     | 0.329066804                                      |
| 7.331958457                                | 1050.372426                                      | 878.579277                                      | 0.148982107                                      |
| 7.188464403                                | 965.2949901                                      | 349.2175346                                     | 0.236038343                                      |
| 7.064923935                                | 595.2336931                                      | 291.1018301                                     | 0.193212459                                      |
| 6.580338774                                | 147.392053                                       | 41.58543046                                     | 0.243613921                                      |
| 6.558365862                                | 218.9935733                                      | 146.1388175                                     | 0.138859063                                      |
| 7.145659575                                | 408.7681244                                      | 258.5702964                                     | 0.176240077                                      |
| 6.659869505                                | 188.4229346                                      | 38.03822441                                     | 0.324379302                                      |
| 6.459293534                                | 167.8726708                                      | 27.97515528                                     | 0.397122153                                      |
| 6.788185867                                | 285.855873                                       | 90.37142857                                     | 0.279388371                                      |
| 7.32197462                                 | 745.0770566                                      | 364.4068032                                     | 0.205358947                                      |
| 6.42511379                                 | 145.7474519                                      | 68.70101925                                     | 0.162145655                                      |
| 6.30054406                                 | 121.2493888                                      | 17.57212714                                     | 0.369992529                                      |
| 6.664912243                                | 136.9798903                                      | 101.5575868                                     | 0.165408082                                      |
| 7.12310833                                 | 1489.184689                                      | 557.6603506                                     | 0.205141945                                      |
| 6.717138719                                | 449.0731473                                      | 108.3060635                                     | 0.250856113                                      |
| 6.397380692                                | 103.7419355                                      | 30.52016129                                     | 0.27309595                                       |
| 6.35654054                                 | 129.4982079                                      | 30.60215054                                     | 0.2897737                                        |
| 6.922633227                                | 377.5921601                                      | 366.970531                                      | 0.136250188                                      |
| 7.122589112                                | 198.3843648                                      | 61.38762215                                     | 0.269253127                                      |
| 7.061899198                                | 459.1048513                                      | 132.6862285                                     | 0.241781451                                      |
| 6.820026758                                | 401.006986                                       | 101.8103792                                     | 0.296007535                                      |
| 6.799919192                                | 361.6817577                                      | 148.7647581                                     | 0.199068684                                      |
| 5.758667261                                | 21.4109589                                       | 13.21917808                                     | 0.189269741                                      |
| 6.554375613                                | 325.2372671                                      | 99.22484472                                     | 0.257243354                                      |
| 6.986165606                                | 719.2040409                                      | 222.2352208                                     | 0.231054595                                      |
| 6.500814176                                | 188.8172589                                      | 39.57614213                                     | 0.309512358                                      |
| 7.037745266                                | 394.3550321                                      | 129.8719486                                     | 0.23212009                                       |
| 6.927707331                                | 380.7515528                                      | 150.2712215                                     | 0.202687437                                      |
| 7.053122116                                | 781.9842198                                      | 314.941165                                      | 0.224514221                                      |
| 6.909037588                                | 387.4610624                                      | 98.43785456                                     | 0.277346483                                      |
| 6.656385365                                | 351.8809524                                      | 74.97883598                                     | 0.312323065                                      |
| 7.404142317                                | 677.8002062                                      | 413.4281051                                     | 0.222206757                                      |
| 6.196739539                                | 126.8607143                                      | 38.85714286                                     | 0.200449767                                      |
| 7.294350777                                | 1085.225892                                      | 713.3675241                                     | 0.155427491                                      |
| 6.692558886                                | 290.9402985                                      | 65.16567164                                     | 0.265846851                                      |
| 6.958664354                                | 543.8882228                                      | 653.7284908                                     | 0.111320043                                      |
| 6.968440149                                | 516.4681555                                      | 107.2870141                                     | 0.311200226                                      |
| 6.655228842                                | 310.9295775                                      | 69.72816901                                     | 0.30603863                                       |
| 6.972627027                                | 181.4807198                                      | 130.8791774                                     | 0.175874509                                      |
| 6.873192846                                | 473.1682632                                      | 122.9183673                                     | 0.297547646                                      |
| 6.975612858                                | 795.9871052                                      | 360.6419361                                     | 0.193057584                                      |
| 6.105671366                                | 97.74949084                                      | 37.0203666                                      | 0.239230829                                      |
| 6.308085649                                | 84.53452685                                      | 22.2685422                                      | 0.261083361                                      |
| 6.180543084                                | 121.0530973                                      | 24.9380531                                      | 0.277131883                                      |
| 6.681065257                                | 257.7583528                                      | 66.81662782                                     | 0.30291623                                       |
| 6.843035592                                | 551.3798923                                      | 145.7590664                                     | 0.263018198                                      |
| 7.193843288                                | 608.0230692                                      | 944.2229188                                     | 0.104436697                                      |
| 6.934814581                                | 225.3398295                                      | 119.2752741                                     | 0.188207862                                      |
| 6.67110128                                 | 165.755832                                       | 26.18195956                                     | 0.384458877                                      |
| 6.593296086                                | 278.7823129                                      | 56.19217687                                     | 0.283678565                                      |
| 7.113478596                                | 601.1449564                                      | 247.1150685                                     | 0.210455221                                      |
| 6.644038553                                | 453.2399613                                      | 107.4460571                                     | 0.250625044                                      |
| 6.529843626                                | 158.1612058                                      | 43.66579292                                     | 0.263863188                                      |
| 7.397965881                                | 981.477738                                       | 1011.878179                                     | 0.134765433                                      |
| 6.720695692                                | 251.3205418                                      | 78.63732129                                     | 0.273063848                                      |
| 6.997027894                                | 514.5667343                                      | 114.5440162                                     | 0.277212931                                      |
| 7.295544281                                | 1317.465145                                      | 429.8056838                                     | 0.239370112                                      |
| 7.02458756                                 | 390.855916                                       | 109.5515267                                     | 0.241956913                                      |
| 6.371394677                                | 141.0502216                                      | 41.15657312                                     | 0.262136754                                      |
| 6.941562727                                | 689.0175387                                      | 172.8304589                                     | 0.254509703                                      |
| 6.10820452                                 | 114.9852217                                      | 22.87684729                                     | 0.330555556                                      |
| 6.953841703                                | 878.2857424                                      | 295.3720747                                     | 0.223999277                                      |
| 7.051386166                                | 1051.174214                                      | 518.1561002                                     | 0.160062565                                      |
| 6.692408007                                | 433.8587571                                      | 119.6111111                                     | 0.233956934                                      |
| 6.323197074                                | 112.9878049                                      | 26.28455285                                     | 0.28955477                                       |
| 7.111371625                                | 785.9451917                                      | 303.1100181                                     | 0.23290636                                       |
| 6.588602593                                | 326.694382                                       | 62.43370787                                     | 0.293574446                                      |
| 6.395692764                                | 195.2021053                                      | 59.14315789                                     | 0.289822609                                      |
| 7.237164731                                | 481.8682664                                      | 296.3521058                                     | 0.166410317                                      |
| 6.35261472                                 | 174.3572985                                      | 65.77124183                                     | 0.199334123                                      |
| 6.906720444                                | 403.5875962                                      | 122.017655                                      | 0.221756047                                      |
| 6.144711142                                | 94.93188854                                      | 17.14860681                                     | 0.371464568                                      |
| 6.693795723                                | 261.695057                                       | 72.76425856                                     | 0.253256949                                      |
| 6.767581629                                | 266.99                                           | 132.0566667                                     | 0.171155962                                      |
| 6.859819839                                | 298.940256                                       | 63.84495021                                     | 0.308930246                                      |
| 6.495961013                                | 175.7336562                                      | 46.37530266                                     | 0.267185                                         |
| 6.876272691                                | 411.2340053                                      | 132.7905346                                     | 0.267565894                                      |
| 6.707894964                                | 305.7321712                                      | 132.0945589                                     | 0.194524501                                      |
| 7.097563531                                | 383.8581952                                      | 177.7425414                                     | 0.201204642                                      |
| 6.243135974                                | 130.9623352                                      | 35.15065913                                     | 0.280642418                                      |
| 6.715761452                                | 239.4174312                                      | 74.78593272                                     | 0.261223509                                      |
| 7.302313371                                | 409.2445255                                      | 306.9535975                                     | 0.183207125                                      |
| 6.780838588                                | 258.9952969                                      | 117.4797178                                     | 0.223695371                                      |
| 6.73609862                                 | 299.5135333                                      | 67.65106072                                     | 0.262029901                                      |
| 6.783140323                                | 150.4701493                                      | 41.48756219                                     | 0.269752989                                      |
| 6.97513823                                 | 335.3309637                                      | 184.1311216                                     | 0.177008281                                      |
| 6.915070961                                | 711.4825594                                      | 300.5640969                                     | 0.190768177                                      |
| 6.818035124                                | 643.2112594                                      | 204.0858967                                     | 0.204396223                                      |
| 6.779148134                                | 492.9770184                                      | 241.059873                                      | 0.162636525                                      |
| 6.953394036                                | 538.7114094                                      | 99.61073826                                     | 0.321012143                                      |
| 6.860759535                                | 469.5065253                                      | 126.1101142                                     | 0.245045669                                      |
| 6.175322839                                | 71.56230032                                      | 19.01277955                                     | 0.287078565                                      |
| 5.788394572                                | 67.73880597                                      | 20.52985075                                     | 0.211821589                                      |
| 7.159324382                                | 1456.948323                                      | 487.1382593                                     | 0.223872387                                      |

| log.sigma.5.0.mm.3D_gldm_DependenceNonUniformityNormalized | log.sigma.5.0.mm.3D_gldm_DependenceVariance | log.sigma.5.0.mm.3D_gldm_LargeDependenceEmphasis |
|------------------------------------------------------------|---------------------------------------------|--------------------------------------------------|
| 0.213379847                                                | 2.338047974                                 | 10.15789474                                      |
| 0.253062479                                                | 1.332591418                                 | 7.178674352                                      |
| 0.221545778                                                | 1.703668885                                 | 9.076233184                                      |
| 0.28991937                                                 | 1.056286409                                 | 6.111801242                                      |
| 0.232238748                                                | 1.7064876                                   | 9.746987952                                      |
| 0.254764019                                                | 1.241718462                                 | 7.47107438                                       |
| 0.099665284                                                | 22.67108755                                 | 56.94895151                                      |
| 0.159079596                                                | 7.393183451                                 | 21.30652604                                      |
| 0.139660651                                                | 10.70237985                                 | 29.49507274                                      |
| 0.195221262                                                | 2.283366519                                 | 11.91390728                                      |
| 0.140741371                                                | 6.383636442                                 | 25.99100257                                      |
| 0.119978904                                                | 10.33628257                                 | 32.31083064                                      |
| 0.232334075                                                | 2.016204439                                 | 9.024660912                                      |
| 0.260671849                                                | 1.252729447                                 | 6.534161491                                      |
| 0.181495792                                                | 4.855677904                                 | 15.56                                            |
| 0.129308757                                                | 14.2144203                                  | 35.35334953                                      |
| 0.165059402                                                | 3.233194261                                 | 17.79048698                                      |
| 0.296453273                                                | 1.031892444                                 | 6.124694377                                      |
| 0.125210137                                                | 7.759144946                                 | 28.28153565                                      |
| 0.162167558                                                | 5.523468557                                 | 19.46433627                                      |
| 0.216108348                                                | 2.029885477                                 | 10.77189605                                      |
| 0.209157128                                                | 2.192881764                                 | 10.78629032                                      |
| 0.232075641                                                | 1.603884842                                 | 8.946236559                                      |
| 0.10497419                                                 | 12.67800098                                 | 41.34528774                                      |
| 0.161550786                                                | 8.285963246                                 | 21.39413681                                      |
| 0.179618486                                                | 4.768137691                                 | 16.32707355                                      |
| 0.200103286                                                | 2.939524145                                 | 11.70159681                                      |
| 0.160533403                                                | 4.645938965                                 | 18.54993342                                      |
| 0.146650403                                                | 5.040908238                                 | 21.15068493                                      |
| 0.202010725                                                | 2.288624667                                 | 11.46086957                                      |
| 0.179397366                                                | 4.664254741                                 | 16.51509105                                      |
| 0.239615811                                                | 1.587325105                                 | 8.474619289                                      |
| 0.168888665                                                | 4.538612401                                 | 16.83211991                                      |
| 0.157661098                                                | 5.592046946                                 | 20.0194617                                       |
| 0.152344481                                                | 6.085567125                                 | 20.18059614                                      |
| 0.1998252                                                  | 4.043704307                                 | 13.58380609                                      |
| 0.232725498                                                | 1.605776364                                 | 8.555555556                                      |
| 0.11644051                                                 | 22.49989303                                 | 49.33980416                                      |
| 0.22653699                                                 | 1.886109694                                 | 11.69642857                                      |
| 0.114875187                                                | 10.66130131                                 | 34.48152853                                      |
| 0.217119626                                                | 2.012332368                                 | 10.37910448                                      |
| 0.095890025                                                | 16.25187184                                 | 51.59062059                                      |
| 0.213593116                                                | 2.351708752                                 | 10.13068652                                      |
| 0.218964491                                                | 1.846589962                                 | 9.297183099                                      |
| 0.116632853                                                | 10.40418382                                 | 32.82647815                                      |
| 0.19707133                                                 | 3.461013485                                 | 12.50104123                                      |
| 0.148754832                                                | 6.193137191                                 | 21.79349654                                      |
| 0.199082466                                                | 2.335862221                                 | 11.95723014                                      |
| 0.216200836                                                | 1.704829246                                 | 10.01278772                                      |
| 0.267816587                                                | 1.234297909                                 | 8.026548673                                      |
| 0.20027844                                                 | 2.817583522                                 | 11.35742036                                      |
| 0.197982008                                                | 2.374401207                                 | 11.50412926                                      |
| 0.076231578                                                | 25.05289011                                 | 75.37462387                                      |
| 0.137234975                                                | 5.933750321                                 | 22.75274056                                      |
| 0.25778512                                                 | 1.393884131                                 | 6.916018663                                      |
| 0.23705979                                                 | 1.585759984                                 | 8.943877551                                      |
| 0.149724771                                                | 7.324863021                                 | 22.74246575                                      |
| 0.219274292                                                | 2.036187337                                 | 10.68553459                                      |
| 0.207288605                                                | 2.413907302                                 | 11.3197903                                       |
| 0.090101693                                                | 30.30407463                                 | 72.92784357                                      |
| 0.189104998                                                | 3.329760774                                 | 12.97291196                                      |
| 0.208749182                                                | 3.353344223                                 | 12.36308316                                      |
| 0.160003054                                                | 6.435736019                                 | 19.83094486                                      |
| 0.186477059                                                | 3.628580065                                 | 14.36545802                                      |
| 0.20834597                                                 | 2.561291125                                 | 11.54357459                                      |
| 0.201408225                                                | 2.37542626                                  | 11.57293189                                      |
| 0.283214832                                                | 1.044480575                                 | 6.729064039                                      |
| 0.172720893                                                | 3.780870685                                 | 15.62340216                                      |
| 0.140007221                                                | 5.835059119                                 | 23.71124134                                      |
| 0.204264952                                                | 2.306983945                                 | 11.92749529                                      |
| 0.22965001                                                 | 1.549110979                                 | 8.922764228                                      |
| 0.157788635                                                | 6.771448267                                 | 20.78317607                                      |
| 0.244714893                                                | 1.535978903                                 | 8.547565543                                      |
| 0.2054759                                                  | 2.097635457                                 | 10.30736842                                      |
| 0.117989291                                                | 10.24414715                                 | 32.86483839                                      |
| 0.189931698                                                | 2.409837622                                 | 13.66666667                                      |
| 0.182701492                                                | 3.130721865                                 | 14.32548665                                      |
| 0.293906776                                                | 1.02684776                                  | 6.120743034                                      |
| 0.199007648                                                | 2.213450534                                 | 11.51711027                                      |
| 0.148327778                                                | 4.7811                                      | 20.75444444                                      |
| 0.212617536                                                | 2.350952735                                 | 10.18776671                                      |
| 0.21275261                                                 | 1.945077945                                 | 10.3874092                                       |
| 0.180207715                                                | 6.884683009                                 | 18.56178791                                      |
| 0.161506694                                                | 4.640813362                                 | 18.55414686                                      |
| 0.141384234                                                | 7.585381806                                 | 24.29134438                                      |
| 0.2466334                                                  | 1.830238934                                 | 9.256120527                                      |
| 0.18304085                                                 | 2.870645475                                 | 12.82110092                                      |
| 0.106685226                                                | 19.21345119                                 | 48.24296142                                      |
| 0.15226061                                                 | 4.583136593                                 | 18.07936508                                      |
| 0.219102804                                                | 2.076996226                                 | 10.50694952                                      |
| 0.187151927                                                | 2.698887404                                 | 12.22885572                                      |
| 0.132437189                                                | 6.675342348                                 | 24.92969984                                      |
| 0.158072108                                                | 4.266692222                                 | 18.46323039                                      |
| 0.186654457                                                | 2.811975091                                 | 14.22170633                                      |
| 0.149070765                                                | 4.836344527                                 | 21.34593287                                      |
| 0.225969551                                                | 1.822175099                                 | 8.890100671                                      |
| 0.191479007                                                | 2.554634629                                 | 12.46737357                                      |
| 0.228633547                                                | 1.810103196                                 | 9.376996805                                      |
| 0.252756739                                                | 1.290487859                                 | 9.76119403                                       |
| 0.165112004                                                | 5.050835509                                 | 17.99093382                                      |

|                                                              |                                                               |                                                               |
|--------------------------------------------------------------|---------------------------------------------------------------|---------------------------------------------------------------|
| log.sigma.5.0.mm.3D_gldm_LargeDependenceLowGrayLevelEmphasis | log.sigma.5.0.mm.3D_gldm_SmallDependenceHighGrayLevelEmphasis | log.sigma.5.0.mm.3D_gldm_LargeDependenceHighGrayLevelEmphasis |
| 0.078911297                                                  | 104.2694586                                                   | 2610.756233                                                   |
| 0.053038445                                                  | 139.8738881                                                   | 2696.481268                                                   |
| 0.047451769                                                  | 115.1426659                                                   | 3040.144619                                                   |
| 0.068603579                                                  | 137.5641303                                                   | 1912.835404                                                   |
| 0.192423734                                                  | 54.51601209                                                   | 1997.91708                                                    |
| 0.100963199                                                  | 101.3518365                                                   | 2021.409091                                                   |
| 0.584306272                                                  | 26.76004395                                                   | 7240.366164                                                   |
| 0.136228369                                                  | 74.08702762                                                   | 4760.243902                                                   |
| 0.36973969                                                   | 43.25549382                                                   | 3704.056312                                                   |
| 0.1644822                                                    | 54.31614645                                                   | 1895.713907                                                   |
| 0.454109744                                                  | 16.52869534                                                   | 2059.236504                                                   |
| 0.421913607                                                  | 34.2057352                                                    | 3992.678309                                                   |
| 0.073388564                                                  | 104.5933084                                                   | 3364.311961                                                   |
| 0.190033733                                                  | 144.6838833                                                   | 1905.697205                                                   |
| 0.3013902                                                    | 60.31750767                                                   | 1713.188571                                                   |
| 0.345642929                                                  | 44.2270032                                                    | 5455.973794                                                   |
| 0.453235059                                                  | 19.07517432                                                   | 1471.815402                                                   |
| 0.100291026                                                  | 128.1934821                                                   | 2036.841076                                                   |
| 0.631229899                                                  | 21.85459924                                                   | 2245.677331                                                   |
| 0.030556185                                                  | 153.7652524                                                   | 13434.91953                                                   |
| 0.180759372                                                  | 53.86605087                                                   | 2265.244947                                                   |
| 0.107479061                                                  | 78.74239812                                                   | 2972.721774                                                   |
| 0.125194084                                                  | 69.58810814                                                   | 1873.46595                                                    |
| 0.474886565                                                  | 23.54015214                                                   | 4769.764248                                                   |
| 0.099761928                                                  | 99.22657409                                                   | 6646.486971                                                   |
| 0.156908699                                                  | 70.38276709                                                   | 3059.798513                                                   |
| 0.090935537                                                  | 101.9068954                                                   | 2533.49501                                                    |
| 0.254263805                                                  | 37.64769766                                                   | 2463.218819                                                   |
| 0.248723722                                                  | 23.42528018                                                   | 2320.575342                                                   |
| 0.171714303                                                  | 53.14237155                                                   | 1720.224224                                                   |
| 0.221242749                                                  | 53.36638181                                                   | 2430.598653                                                   |
| 0.059562505                                                  | 97.07224177                                                   | 2549.384518                                                   |
| 0.158638822                                                  | 65.319637                                                     | 3106.222698                                                   |
| 0.156299125                                                  | 48.39472256                                                   | 3875.354037                                                   |
| 0.224665387                                                  | 54.45209412                                                   | 2857.436587                                                   |
| 0.124300867                                                  | 81.50841529                                                   | 3686.487365                                                   |
| 0.049152292                                                  | 128.513544                                                    | 3191.616402                                                   |
| 0.266379012                                                  | 67.64402216                                                   | 11700.21474                                                   |
| 0.185571955                                                  | 36.46743771                                                   | 2128.158929                                                   |
| 0.126477627                                                  | 61.18815571                                                   | 10727.83106                                                   |
| 0.160869364                                                  | 67.75318274                                                   | 1886.308209                                                   |
| 0.366474277                                                  | 24.58175331                                                   | 8080.768865                                                   |
| 0.080147397                                                  | 112.6266159                                                   | 2790.287014                                                   |
| 0.186929239                                                  | 74.57025314                                                   | 1602.771831                                                   |
| 0.30593981                                                   | 37.09170792                                                   | 4843.705656                                                   |
| 0.133600003                                                  | 80.68787838                                                   | 2316.599334                                                   |
| 0.160397462                                                  | 49.26326271                                                   | 4127.990095                                                   |
| 0.415649351                                                  | 32.6694081                                                    | 1401.193483                                                   |
| 0.461566076                                                  | 57.95386658                                                   | 1505.168798                                                   |
| 0.070384126                                                  | 70.54394174                                                   | 2027.316372                                                   |
| 0.209638768                                                  | 76.58410824                                                   | 1396.731158                                                   |
| 0.061083598                                                  | 91.92914604                                                   | 3244.132496                                                   |
| 0.676561991                                                  | 18.72424138                                                   | 9703.746991                                                   |
| 0.144781454                                                  | 49.97705304                                                   | 4494.721681                                                   |
| 0.127533825                                                  | 147.3490034                                                   | 2644.73717                                                    |
| 0.143041909                                                  | 65.03711519                                                   | 1766.314626                                                   |
| 0.252216988                                                  | 48.62649445                                                   | 3615.253051                                                   |
| 0.109193403                                                  | 65.15931986                                                   | 2096.837929                                                   |
| 0.084580362                                                  | 75.16640399                                                   | 2689.796855                                                   |
| 0.448113826                                                  | 31.7512486                                                    | 13845.92325                                                   |
| 0.123077314                                                  | 64.91334218                                                   | 2211.07374                                                    |
| 0.054562198                                                  | 100.5095562                                                   | 4226.125355                                                   |
| 0.077099208                                                  | 103.6599294                                                   | 6493.547607                                                   |
| 0.105560814                                                  | 77.51874407                                                   | 4115.752385                                                   |
| 0.207070458                                                  | 45.10348581                                                   | 1423.763663                                                   |
| 0.052772275                                                  | 95.02399009                                                   | 3934.169249                                                   |
| 0.062079639                                                  | 103.2888663                                                   | 1992.94335                                                    |
| 0.115673711                                                  | 70.46037412                                                   | 3197.333137                                                   |
| 0.209671409                                                  | 34.4606129                                                    | 4181.50293                                                    |
| 0.070631819                                                  | 57.00312775                                                   | 3224.909605                                                   |
| 0.213715396                                                  | 58.86333316                                                   | 1402.841463                                                   |
| 0.192991453                                                  | 62.36756771                                                   | 4105.964465                                                   |
| 0.197027319                                                  | 69.76864645                                                   | 1536.429963                                                   |
| 0.220180503                                                  | 47.84609426                                                   | 1106.918947                                                   |
| 0.249564858                                                  | 47.83019582                                                   | 6047.479922                                                   |
| 0.537882906                                                  | 22.95919963                                                   | 1317.14488                                                    |
| 0.112249844                                                  | 57.47245953                                                   | 3533.177909                                                   |
| 0.025413176                                                  | 167.7929033                                                   | 3018.668731                                                   |
| 0.078408247                                                  | 66.61528466                                                   | 2778.795437                                                   |
| 0.21009578                                                   | 33.96363235                                                   | 3162.195556                                                   |
| 0.082127722                                                  | 103.2902978                                                   | 2567.52845                                                    |
| 0.05895492                                                   | 67.91767198                                                   | 3265.710654                                                   |
| 0.43561963                                                   | 53.35088098                                                   | 2647.690184                                                   |
| 0.216851976                                                  | 39.02195923                                                   | 2436.690967                                                   |
| 0.231408272                                                  | 49.0966051                                                    | 3926.574586                                                   |
| 0.024391301                                                  | 131.7647868                                                   | 5125.084746                                                   |
| 0.160685702                                                  | 59.15318469                                                   | 2350.420489                                                   |
| 0.482976988                                                  | 43.41850306                                                   | 6856.13634                                                    |
| 0.179675591                                                  | 45.57952175                                                   | 2615.590241                                                   |
| 0.18547001                                                   | 61.12986796                                                   | 2095.048281                                                   |
| 0.042251977                                                  | 117.4629854                                                   | 5180.20398                                                    |
| 0.165926465                                                  | 51.27604284                                                   | 5222.837283                                                   |
| 0.120716232                                                  | 50.87685352                                                   | 3920.809598                                                   |
| 0.161434264                                                  | 47.84959058                                                   | 2346.614916                                                   |
| 0.250385699                                                  | 30.1113295                                                    | 2811.560327                                                   |
| 0.093523524                                                  | 107.5683645                                                   | 2567.591443                                                   |
| 0.225078534                                                  | 50.63725006                                                   | 2022.400082                                                   |
| 0.065042342                                                  | 77.62017681                                                   | 2430.792332                                                   |
| 0.123775759                                                  | 34.41698444                                                   | 1706.264925                                                   |
| 0.076794203                                                  | 75.27209961                                                   | 5606.916478                                                   |

| log.sigma.5.0.mm.3D_gldm_SmallDependenceLowGrayLevelEmphasis | log.sigma.5.0.mm.3D_gldm_LowGrayLevelEmphasis | log.sigma.5.0.mm.3D_gldm_DistanceZoneVariabilityNormalized |
|--------------------------------------------------------------|-----------------------------------------------|------------------------------------------------------------|
| 0.003057455                                                  | 0.008125174                                   | 0.890635301                                                |
| 0.004929173                                                  | 0.009640052                                   | 0.98726167                                                 |
| 0.002995841                                                  | 0.006774464                                   | 0.901144191                                                |
| 0.005284284                                                  | 0.014847447                                   | 0.880013149                                                |
| 0.004864763                                                  | 0.021164834                                   | 0.885291046                                                |
| 0.007098032                                                  | 0.014030569                                   | 0.925346404                                                |
| 0.002366681                                                  | 0.015492763                                   | 0.929076794                                                |
| 0.001628868                                                  | 0.006998264                                   | 0.925527865                                                |
| 0.0023597                                                    | 0.013536188                                   | 0.960514996                                                |
| 0.0043526                                                    | 0.013699234                                   | 0.93052512                                                 |
| 0.00312181                                                   | 0.019483973                                   | 0.939971807                                                |
| 0.002571947                                                  | 0.015857927                                   | 0.937298418                                                |
| 0.003793097                                                  | 0.010155502                                   | 0.856776359                                                |
| 0.00350264                                                   | 0.016512541                                   | 0.834710744                                                |
| 0.003132666                                                  | 0.017958805                                   | 0.93956735                                                 |
| 0.002445491                                                  | 0.013231219                                   | 0.968624239                                                |
| 0.003591769                                                  | 0.025187412                                   | 1                                                          |
| 0.007901337                                                  | 0.01644911                                    | 0.847942227                                                |
| 0.003754559                                                  | 0.028786801                                   | 0.94035503                                                 |
| 0.000444818                                                  | 0.001707616                                   | 0.953793802                                                |
| 0.00433048                                                   | 0.017840428                                   | 0.951011338                                                |
| 0.004124185                                                  | 0.011474295                                   | 0.888038549                                                |
| 0.003981395                                                  | 0.016450604                                   | 0.934654251                                                |
| 0.001636731                                                  | 0.014198926                                   | 0.958193986                                                |
| 0.002309108                                                  | 0.006949934                                   | 0.948884342                                                |
| 0.002548494                                                  | 0.010666009                                   | 0.952968501                                                |
| 0.002304456                                                  | 0.007859954                                   | 0.944719744                                                |
| 0.002805168                                                  | 0.014432806                                   | 0.949450401                                                |
| 0.010259282                                                  | 0.019271423                                   | 0.944489796                                                |
| 0.004156918                                                  | 0.014066767                                   | 0.982907253                                                |
| 0.00246822                                                   | 0.012919751                                   | 0.961412012                                                |
| 0.003810296                                                  | 0.00868594                                    | 0.899653524                                                |
| 0.002239                                                     | 0.00906201                                    | 0.889929596                                                |
| 0.001824267                                                  | 0.008525853                                   | 0.969185633                                                |
| 0.002252807                                                  | 0.010818046                                   | 0.941828186                                                |
| 0.002574443                                                  | 0.010874258                                   | 0.828136836                                                |
| 0.002213259                                                  | 0.006237856                                   | 0.700700178                                                |
| 0.001743911                                                  | 0.007697787                                   | 0.94332011                                                 |
| 0.003207679                                                  | 0.017712826                                   | 0.876405709                                                |
| 0.000713809                                                  | 0.00398143                                    | 0.955578512                                                |
| 0.003074281                                                  | 0.012535392                                   | 0.891663364                                                |
| 0.000938076                                                  | 0.007681786                                   | 0.947920046                                                |
| 0.002388534                                                  | 0.007520569                                   | 0.944012075                                                |
| 0.004254496                                                  | 0.015101503                                   | 0.908635762                                                |
| 0.002552063                                                  | 0.012504913                                   | 0.887899654                                                |
| 0.002585034                                                  | 0.009885855                                   | 0.937852141                                                |
| 0.001339736                                                  | 0.007463978                                   | 0.964776432                                                |
| 0.006111467                                                  | 0.032003765                                   | 0.985916201                                                |
| 0.004359234                                                  | 0.032421562                                   | 0.879292404                                                |
| 0.004751837                                                  | 0.011292673                                   | 0.963203125                                                |
| 0.003381296                                                  | 0.013221945                                   | 0.987207353                                                |
| 0.002476943                                                  | 0.006384719                                   | 0.918110194                                                |
| 0.001208545                                                  | 0.011864385                                   | 0.928109372                                                |
| 0.001950448                                                  | 0.007301698                                   | 0.933412604                                                |
| 0.004923532                                                  | 0.016656633                                   | 0.898703594                                                |
| 0.004111814                                                  | 0.014514243                                   | 0.948872472                                                |
| 0.001818825                                                  | 0.011352227                                   | 0.965562759                                                |
| 0.002152712                                                  | 0.009579882                                   | 0.947730035                                                |
| 0.003650779                                                  | 0.008990935                                   | 0.871339811                                                |
| 0.001107761                                                  | 0.008452994                                   | 0.942725074                                                |
| 0.004060341                                                  | 0.010855085                                   | 0.945123875                                                |
| 0.001974104                                                  | 0.005359373                                   | 0.908677375                                                |
| 0.001010273                                                  | 0.003953881                                   | 0.887909878                                                |
| 0.002001679                                                  | 0.008575067                                   | 0.866322119                                                |
| 0.005727842                                                  | 0.020453136                                   | 0.963482964                                                |
| 0.001540034                                                  | 0.005034059                                   | 0.897322449                                                |
| 0.00557258                                                   | 0.012352189                                   | 0.868788927                                                |
| 0.001465165                                                  | 0.007184315                                   | 0.890294813                                                |
| 0.001399741                                                  | 0.009032814                                   | 0.96600708                                                 |
| 0.002322535                                                  | 0.007418334                                   | 0.944489796                                                |
| 0.007878303                                                  | 0.022543294                                   | 0.977530992                                                |
| 0.002342289                                                  | 0.011093697                                   | 0.943891358                                                |
| 0.004931808                                                  | 0.018560998                                   | 0.948550796                                                |
| 0.005278044                                                  | 0.019894279                                   | 0.987805337                                                |
| 0.001262204                                                  | 0.009250108                                   | 0.813714664                                                |
| 0.005909796                                                  | 0.035370534                                   | 0.973099174                                                |
| 0.002192548                                                  | 0.009077995                                   | 0.939043474                                                |
| 0.005595719                                                  | 0.007981047                                   | 0.771468144                                                |
| 0.003705559                                                  | 0.009336079                                   | 0.917428947                                                |
| 0.002455909                                                  | 0.011003246                                   | 0.96001666                                                 |
| 0.003751844                                                  | 0.009104196                                   | 0.894491036                                                |
| 0.003931013                                                  | 0.008773863                                   | 0.977862553                                                |
| 0.003481106                                                  | 0.02134862                                    | 0.975679363                                                |
| 0.002193944                                                  | 0.012686384                                   | 0.956226331                                                |
| 0.002446587                                                  | 0.011565182                                   | 0.909433621                                                |
| 0.003216407                                                  | 0.005327593                                   | 0.91725347                                                 |
| 0.002732874                                                  | 0.012277302                                   | 0.886669529                                                |
| 0.001903388                                                  | 0.012425991                                   | 0.975004006                                                |
| 0.002833311                                                  | 0.011257982                                   | 0.968044961                                                |
| 0.005461415                                                  | 0.020656977                                   | 0.942145021                                                |
| 0.0027611                                                    | 0.005339194                                   | 0.788564389                                                |
| 0.001392322                                                  | 0.007975434                                   | 0.939937504                                                |
| 0.001251094                                                  | 0.006796872                                   | 0.947681813                                                |
| 0.002313606                                                  | 0.011509864                                   | 0.961919125                                                |
| 0.001700716                                                  | 0.010491612                                   | 0.957259693                                                |
| 0.002686824                                                  | 0.009695207                                   | 0.841365838                                                |
| 0.005111122                                                  | 0.017057886                                   | 0.882187755                                                |
| 0.006096546                                                  | 0.011380085                                   | 0.91322314                                                 |
| 0.00663823                                                   | 0.017558167                                   | 0.971836735                                                |
| 0.001253629                                                  | 0.004779316                                   | 0.923687558                                                |

| log.sigma.5.0.mm.3D_gldzm_LowIntensityEmphasis | log.sigma.5.0.mm.3D_gldzm_LargeDistanceEmphasis | log.sigma.5.0.mm.3D_gldzm_HighIntensitySmallDistanceEmphasis |
|------------------------------------------------|-------------------------------------------------|--------------------------------------------------------------|
| 0.009725051                                    | 1.174157303                                     | 328.3515918                                                  |
| 0.012987805                                    | 1.019230769                                     | 377.9166667                                                  |
| 0.009198409                                    | 1.156441718                                     | 367.8519939                                                  |
| 0.016154731                                    | 1.192307692                                     | 349.974359                                                   |
| 0.02056509                                     | 1.183257919                                     | 207.9400452                                                  |
| 0.019337936                                    | 1.116504854                                     | 299.0825243                                                  |
| 0.017092653                                    | 1.110451306                                     | 185.2801366                                                  |
| 0.006852971                                    | 1.116209774                                     | 311.3002086                                                  |
| 0.011712137                                    | 1.060445387                                     | 232.0296925                                                  |
| 0.016645665                                    | 1.108108108                                     | 222.0394144                                                  |
| 0.022925811                                    | 1.092920354                                     | 126.3141593                                                  |
| 0.014374678                                    | 1.097201767                                     | 196.660162                                                   |
| 0.011247601                                    | 1.232919255                                     | 311.7639752                                                  |
| 0.010742546                                    | 1.272727273                                     | 356.213474                                                   |
| 0.012622931                                    | 1.093567251                                     | 218.3075049                                                  |
| 0.012591881                                    | 1.047826087                                     | 215.2358696                                                  |
| 0.024288343                                    | 1                                               | 131.2333333                                                  |
| 0.018931564                                    | 1.248704663                                     | 332.6217617                                                  |
| 0.022777328                                    | 1.092307692                                     | 139.3102564                                                  |
| 0.002121481                                    | 1.070989115                                     | 744.6814955                                                  |
| 0.018525547                                    | 1.075376884                                     | 211.8082077                                                  |
| 0.015093114                                    | 1.178571429                                     | 281.5803571                                                  |
| 0.015805728                                    | 1.101449275                                     | 239.5869565                                                  |
| 0.012494727                                    | 1.06407767                                      | 187.2305825                                                  |
| 0.008623472                                    | 1.078740157                                     | 367.996063                                                   |
| 0.010711444                                    | 1.072289157                                     | 291.5686078                                                  |
| 0.008208764                                    | 1.085348506                                     | 339.6891892                                                  |
| 0.015023294                                    | 1.077844311                                     | 196.5249501                                                  |
| 0.04576263                                     | 1.085714286                                     | 121.8285714                                                  |
| 0.015482388                                    | 1.025862069                                     | 212.5721983                                                  |
| 0.010848613                                    | 1.059044049                                     | 239.3626992                                                  |
| 0.011635541                                    | 1.158940397                                     | 305.843543                                                   |
| 0.009593188                                    | 1.17535545                                      | 275.3625592                                                  |
| 0.008854107                                    | 1.046956522                                     | 235.5982609                                                  |
| 0.010431266                                    | 1.089955022                                     | 245.8139055                                                  |
| 0.009798975                                    | 1.284839204                                     | 285.0233538                                                  |
| 0.007182906                                    | 1.549657534                                     | 383.3831336                                                  |
| 0.007667876                                    | 1.087576375                                     | 306.3547183                                                  |
| 0.020208574                                    | 1.198529412                                     | 178.0606618                                                  |
| 0.004511094                                    | 1.068181818                                     | 404.458649                                                   |
| 0.011211528                                    | 1.172413793                                     | 255.7534483                                                  |
| 0.008878194                                    | 1.080267559                                     | 238.1024247                                                  |
| 0.007857446                                    | 1.086474501                                     | 357.7427938                                                  |
| 0.01364518                                     | 1.143953935                                     | 240.5076775                                                  |
| 0.01439016                                     | 1.178807947                                     | 215.6456954                                                  |
| 0.008955129                                    | 1.096313912                                     | 267.2901308                                                  |
| 0.007186812                                    | 1.053800171                                     | 264.0730145                                                  |
| 0.032736398                                    | 1.021276596                                     | 137.1276596                                                  |
| 0.023634078                                    | 1.193548387                                     | 208.5947581                                                  |
| 0.016050001                                    | 1.05625                                         | 256.6203125                                                  |
| 0.010920717                                    | 1.019313305                                     | 255.0332618                                                  |
| 0.008983139                                    | 1.128323699                                     | 346.0491329                                                  |
| 0.012489687                                    | 1.11201867                                      | 188.876021                                                   |
| 0.010026136                                    | 1.103448276                                     | 270.0610632                                                  |
| 0.013269204                                    | 1.160535117                                     | 380.1580268                                                  |
| 0.013902546                                    | 1.07875895                                      | 229.4749403                                                  |
| 0.009467964                                    | 1.05257732                                      | 237.8690722                                                  |
| 0.009265426                                    | 1.08056872                                      | 259.1986572                                                  |
| 0.012661404                                    | 1.207317073                                     | 281.6676829                                                  |
| 0.00951927                                     | 1.08852459                                      | 242.6740984                                                  |
| 0.014239208                                    | 1.084705882                                     | 235.7094118                                                  |
| 0.006846936                                    | 1.143884892                                     | 358.442446                                                   |
| 0.00415602                                     | 1.178790535                                     | 425.6665206                                                  |
| 0.009186599                                    | 1.216080402                                     | 314.5783082                                                  |
| 0.022453655                                    | 1.055813953                                     | 171.5848837                                                  |
| 0.006109696                                    | 1.162857143                                     | 365.6204762                                                  |
| 0.01573203                                     | 1.211764706                                     | 301.3970588                                                  |
| 0.007049734                                    | 1.17473525                                      | 316.1976172                                                  |
| 0.008720227                                    | 1.051886792                                     | 225.9530267                                                  |
| 0.009876781                                    | 1.085714286                                     | 240.094958                                                   |
| 0.024588434                                    | 1.034090909                                     | 201.7982955                                                  |
| 0.010693858                                    | 1.086666667                                     | 268.4114815                                                  |
| 0.017000811                                    | 1.079268293                                     | 239.4522358                                                  |
| 0.019286711                                    | 1.018404908                                     | 165.8228528                                                  |
| 0.008617011                                    | 1.318059299                                     | 290.7118524                                                  |
| 0.030927975                                    | 1.040909091                                     | 117.2420455                                                  |
| 0.011053989                                    | 1.094405594                                     | 260.1966783                                                  |
| 0.012894552                                    | 1.394736842                                     | 439.6743421                                                  |
| 0.014011828                                    | 1.129441624                                     | 259.1510152                                                  |
| 0.014541238                                    | 1.06122449                                      | 205.8199708                                                  |
| 0.011790571                                    | 1.167630058                                     | 325.1339114                                                  |
| 0.013965562                                    | 1.03358209                                      | 251.8152985                                                  |
| 0.013437519                                    | 1.036935705                                     | 199.5222298                                                  |
| 0.012838371                                    | 1.067164179                                     | 205.6996269                                                  |
| 0.012492128                                    | 1.142630745                                     | 239.6473851                                                  |
| 0.010074029                                    | 1.12972973                                      | 456.927027                                                   |
| 0.011778434                                    | 1.180904523                                     | 222.7506281                                                  |
| 0.009970848                                    | 1.037974684                                     | 246.6857595                                                  |
| 0.01282512                                     | 1.048723898                                     | 208.8584687                                                  |
| 0.020709095                                    | 1.089449541                                     | 233.3199541                                                  |
| 0.009353961                                    | 1.360465116                                     | 408.6114341                                                  |
| 0.009017544                                    | 1.092975207                                     | 295.7789256                                                  |
| 0.00718159                                     | 1.080645161                                     | 273.141129                                                   |
| 0.01224556                                     | 1.058252427                                     | 237.0855583                                                  |
| 0.011399681                                    | 1.083484574                                     | 193.6069772                                                  |
| 0.009073938                                    | 1.260586319                                     | 322.1881107                                                  |
| 0.020010592                                    | 1.188571429                                     | 201.9864286                                                  |
| 0.019256963                                    | 1.136363636                                     | 261.6318182                                                  |
| 0.031209694                                    | 1.042857143                                     | 160.5285714                                                  |
| 0.005615428                                    | 1.119205298                                     | 330.9178808                                                  |

| log.sigma.5.0.mm.3D_gldzm_LowIntensityLargeDistanceEmphasis | log.sigma.5.0.mm.3D_gldzm_HighIntensityEmphasis | log.sigma.5.0.mm.3D_gldzm_DistanceZoneVariability | log.sigma.5.0.mm.3D_gldzm_ZonePercentage |
|-------------------------------------------------------------|-------------------------------------------------|---------------------------------------------------|------------------------------------------|
| 0.010728866                                                 | 338.9569288                                     | 475.5992509                                       | 0.369806094                              |
| 0.013027538                                                 | 380.2435897                                     | 154.0128205                                       | 0.449567723                              |
| 0.009775013                                                 | 379.5736196                                     | 293.7730061                                       | 0.365470852                              |
| 0.017275959                                                 | 359.8205128                                     | 137.2820513                                       | 0.48447205                               |
| 0.022230537                                                 | 214.6696833                                     | 391.2986425                                       | 0.313253012                              |
| 0.020069033                                                 | 306.5242718                                     | 95.31067961                                       | 0.425619835                              |
| 0.018096352                                                 | 190.3159145                                     | 1564.565321                                       | 0.159787456                              |
| 0.007656809                                                 | 318.5101311                                     | 1553.035757                                       | 0.27653263                               |
| 0.012363294                                                 | 233.8144221                                     | 905.7656416                                       | 0.221257626                              |
| 0.017663407                                                 | 225.7792793                                     | 206.5765766                                       | 0.294039735                              |
| 0.02392701                                                  | 128.8628319                                     | 212.4336283                                       | 0.145244216                              |
| 0.015090174                                                 | 201.4064801                                     | 636.4256259                                       | 0.199295568                              |
| 0.012556574                                                 | 323.1677019                                     | 275.8819876                                       | 0.397040691                              |
| 0.014270929                                                 | 364.7727273                                     | 257.0909091                                       | 0.47826087                               |
| 0.019664593                                                 | 220.6920078                                     | 481.9980507                                       | 0.325714286                              |
| 0.012886202                                                 | 217.4326087                                     | 1336.701449                                       | 0.239500174                              |
| 0.024288343                                                 | 131.2333333                                     | 150                                               | 0.169875425                              |
| 0.02130554                                                  | 340.9533679                                     | 163.6528497                                       | 0.471882641                              |
| 0.023702313                                                 | 141.825641                                      | 183.3692308                                       | 0.178244973                              |
| 0.002215753                                                 | 758.6791292                                     | 2015.366304                                       | 0.230099096                              |
| 0.019174566                                                 | 214.3232831                                     | 567.7537688                                       | 0.287295476                              |
| 0.016384124                                                 | 289.25                                          | 149.1904762                                       | 0.338709677                              |
| 0.01668482                                                  | 243.0434783                                     | 193.47343                                         | 0.370967742                              |
| 0.013165015                                                 | 189.3029126                                     | 493.4699029                                       | 0.143174868                              |
| 0.008995603                                                 | 373.1102362                                     | 361.5249344                                       | 0.310260586                              |
| 0.010997207                                                 | 297.1659973                                     | 711.8674699                                       | 0.292253521                              |
| 0.008903941                                                 | 344.0953058                                     | 664.1379801                                       | 0.350798403                              |
| 0.016679104                                                 | 198.2015968                                     | 475.6746507                                       | 0.222370173                              |
| 0.046199948                                                 | 126.0285714                                     | 33.05714286                                       | 0.239726027                              |
| 0.015713286                                                 | 213.3771552                                     | 456.0689655                                       | 0.288198758                              |
| 0.01128173                                                  | 241.7160262                                     | 1025.826617                                       | 0.26615116                               |
| 0.01268603                                                  | 312.9139073                                     | 271.6953642                                       | 0.383248731                              |
| 0.010890209                                                 | 285.1800948                                     | 563.3254344                                       | 0.271092077                              |
| 0.009075556                                                 | 238.2434783                                     | 557.2817391                                       | 0.238095238                              |
| 0.01143033                                                  | 249.1034483                                     | 1256.398801                                       | 0.259887006                              |
| 0.012792452                                                 | 297.0796325                                     | 540.7733538                                       | 0.336771532                              |
| 0.020836097                                                 | 403.9297945                                     | 409.2089041                                       | 0.386243386                              |
| 0.008141311                                                 | 311.221317                                      | 1389.510523                                       | 0.253049304                              |
| 0.025846997                                                 | 181.4411765                                     | 119.1911765                                       | 0.242857143                              |
| 0.004840323                                                 | 410.5107323                                     | 1513.633634                                       | 0.167672277                              |
| 0.012358189                                                 | 264.1448276                                     | 387.8735632                                       | 0.324626866                              |
| 0.009420951                                                 | 242.2173913                                     | 566.8561873                                       | 0.105430183                              |
| 0.008567182                                                 | 361.827051                                      | 851.4988914                                       | 0.373035567                              |
| 0.015462578                                                 | 245.756238                                      | 473.3992322                                       | 0.366901408                              |
| 0.016316754                                                 | 221.1390728                                     | 268.1456954                                       | 0.194087404                              |
| 0.009858334                                                 | 271.4494649                                     | 788.7336504                                       | 0.350270721                              |
| 0.007666142                                                 | 266.2724167                                     | 1129.753202                                       | 0.2188376                                |
| 0.033327414                                                 | 137.3191489                                     | 139.0141844                                       | 0.287169043                              |
| 0.026501885                                                 | 215.0241935                                     | 109.0322581                                       | 0.31713555                               |
| 0.016427967                                                 | 259.4                                           | 154.1125                                          | 0.353982301                              |
| 0.011102667                                                 | 255.5965665                                     | 460.0386266                                       | 0.362082362                              |
| 0.009624502                                                 | 355.2                                           | 794.1653179                                       | 0.31059246                               |
| 0.014318763                                                 | 193.8424737                                     | 795.3897316                                       | 0.107447342                              |
| 0.010521355                                                 | 275.7614943                                     | 324.8275862                                       | 0.211936663                              |
| 0.014707418                                                 | 386.6923077                                     | 268.7123746                                       | 0.465007776                              |
| 0.014597613                                                 | 232.8400955                                     | 397.5775656                                       | 0.356292517                              |
| 0.009970589                                                 | 240                                             | 936.5958763                                       | 0.241594022                              |
| 0.00977524                                                  | 262.685624                                      | 599.9131122                                       | 0.306240929                              |
| 0.014517449                                                 | 289.4268293                                     | 214.3495935                                       | 0.322411533                              |
| 0.010320915                                                 | 246.9645902                                     | 1437.655738                                       | 0.139998164                              |
| 0.01484064                                                  | 240.1035294                                     | 401.6776471                                       | 0.319789315                              |
| 0.007403289                                                 | 370.7553957                                     | 757.8369305                                       | 0.338336714                              |
| 0.004751647                                                 | 442.2611744                                     | 2026.210342                                       | 0.277143551                              |
| 0.010762613                                                 | 325.1876047                                     | 517.1943049                                       | 0.284828244                              |
| 0.023041827                                                 | 173.1023256                                     | 207.1488372                                       | 0.317577548                              |
| 0.007015147                                                 | 375.8704762                                     | 942.1885714                                       | 0.306927799                              |
| 0.017445739                                                 | 309.0823529                                     | 147.6941176                                       | 0.418719212                              |
| 0.008668735                                                 | 326.0854766                                     | 1176.969743                                       | 0.259980334                              |
| 0.009084544                                                 | 228.2649371                                     | 1228.761006                                       | 0.169419286                              |
| 0.010217758                                                 | 246.0521008                                     | 561.9714286                                       | 0.280131827                              |
| 0.025411124                                                 | 202.4204545                                     | 172.0454545                                       | 0.357723577                              |
| 0.011669568                                                 | 271.3259259                                     | 1274.253333                                       | 0.271029914                              |
| 0.018009596                                                 | 241.6626016                                     | 466.6869919                                       | 0.368539326                              |
| 0.019492346                                                 | 166.2392638                                     | 322.0245399                                       | 0.343157895                              |
| 0.020160098                                                 | 303.3867925                                     | 603.7762803                                       | 0.181684623                              |
| 0.031798124                                                 | 117.75                                          | 214.0818182                                       | 0.239651416                              |
| 0.01157421                                                  | 265.4912587                                     | 537.1328671                                       | 0.258940697                              |
| 0.015297112                                                 | 463.6052632                                     | 117.2631579                                       | 0.470588235                              |
| 0.014840766                                                 | 265.4365482                                     | 361.4670051                                       | 0.299619772                              |
| 0.017157207                                                 | 207.9300292                                     | 329.2857143                                       | 0.190555556                              |
| 0.012784807                                                 | 335.1541426                                     | 464.2408478                                       | 0.36913229                               |
| 0.014201024                                                 | 253.4440299                                     | 262.0671642                                       | 0.324455206                              |
| 0.013837668                                                 | 200.6087551                                     | 713.2216142                                       | 0.320333041                              |
| 0.013523787                                                 | 207.641791                                      | 384.4029851                                       | 0.212361331                              |
| 0.013703093                                                 | 247.1901743                                     | 573.8526149                                       | 0.232412523                              |
| 0.010454212                                                 | 468.4486486                                     | 169.6918919                                       | 0.348399247                              |
| 0.01370871                                                  | 228.9522613                                     | 352.8944724                                       | 0.304281346                              |
| 0.010325577                                                 | 248.3481013                                     | 770.2531646                                       | 0.205943691                              |
| 0.013259899                                                 | 210.4176334                                     | 417.2273782                                       | 0.253380364                              |
| 0.021271708                                                 | 237.6100917                                     | 410.7752294                                       | 0.318946598                              |
| 0.010343636                                                 | 445.4806202                                     | 203.4496124                                       | 0.320895522                              |
| 0.019210738                                                 | 298.3140496                                     | 454.9297521                                       | 0.191153239                              |
| 0.007603515                                                 | 277.6612903                                     | 881.344086                                        | 0.206620751                              |
| 0.012595396                                                 | 240.243932                                      | 792.6213592                                       | 0.239117818                              |
| 0.012501675                                                 | 195.7477314                                     | 527.4500907                                       | 0.166616269                              |
| 0.011761725                                                 | 335.4136808                                     | 774.897937                                        | 0.386325503                              |
| 0.021641667                                                 | 209.63                                          | 617.5314286                                       | 0.28548124                               |
| 0.020301782                                                 | 267.1                                           | 100.4545455                                       | 0.3514377                                |
| 0.031879337                                                 | 161.2142857                                     | 68.02857143                                       | 0.26119403                               |
| 0.006046653                                                 | 340.7642384                                     | 2092.152318                                       | 0.25668631                               |

| log.sigma.5.0.mm.3D_gldzm_IntensityVariabilityNormalized | log.sigma.5.0.mm.3D_gldzm_LowIntensitySmallDistanceEmphasis | log.sigma.5.0.mm.3D_gldzm_IntensityVariability |
|----------------------------------------------------------|-------------------------------------------------------------|------------------------------------------------|
| 0.042685407                                              | 0.009474097                                                 | 22.79400749                                    |
| 0.047419461                                              | 0.012977872                                                 | 7.397435897                                    |
| 0.044469118                                              | 0.009054258                                                 | 14.49693252                                    |
| 0.042735043                                              | 0.015874424                                                 | 6.666666667                                    |
| 0.048156262                                              | 0.020148728                                                 | 21.28506787                                    |
| 0.046469978                                              | 0.019155162                                                 | 4.786407767                                    |
| 0.05180658                                               | 0.016841729                                                 | 87.24228029                                    |
| 0.046906542                                              | 0.006652012                                                 | 78.70917759                                    |
| 0.050938489                                              | 0.011549348                                                 | 48.0349947                                     |
| 0.05174093                                               | 0.01639123                                                  | 11.48648649                                    |
| 0.070287415                                              | 0.022675511                                                 | 15.88495575                                    |
| 0.054947391                                              | 0.014195804                                                 | 37.30927835                                    |
| 0.044539177                                              | 0.010920358                                                 | 14.34161491                                    |
| 0.044990724                                              | 0.00986045                                                  | 13.85714286                                    |
| 0.05380193                                               | 0.010862516                                                 | 27.60038986                                    |
| 0.048923545                                              | 0.0125183                                                   | 67.51449275                                    |
| 0.069422222                                              | 0.024288343                                                 | 10.41333333                                    |
| 0.042336707                                              | 0.018338069                                                 | 8.170984456                                    |
| 0.0695595                                                | 0.022546082                                                 | 13.56410256                                    |
| 0.044484496                                              | 0.002097913                                                 | 93.99574065                                    |
| 0.051179965                                              | 0.018363292                                                 | 30.55443886                                    |
| 0.054634354                                              | 0.014770362                                                 | 9.178571429                                    |
| 0.051693155                                              | 0.015585955                                                 | 10.70048309                                    |
| 0.064160618                                              | 0.012327155                                                 | 33.04271845                                    |
| 0.043847865                                              | 0.008530439                                                 | 16.70603675                                    |
| 0.047018955                                              | 0.010640003                                                 | 35.1231593                                     |
| 0.046690773                                              | 0.00803497                                                  | 32.82361309                                    |
| 0.060322469                                              | 0.014609341                                                 | 30.22155689                                    |
| 0.067755102                                              | 0.045653301                                                 | 2.371428571                                    |
| 0.054455262                                              | 0.015424663                                                 | 25.26724138                                    |
| 0.053153785                                              | 0.010740334                                                 | 56.71508903                                    |
| 0.051269681                                              | 0.011372919                                                 | 15.48344371                                    |
| 0.049097929                                              | 0.009268933                                                 | 31.07898894                                    |
| 0.0624                                                   | 0.008798745                                                 | 35.88                                          |
| 0.049989998                                              | 0.0101815                                                   | 66.68665667                                    |
| 0.049804296                                              | 0.009050606                                                 | 32.52220521                                    |
| 0.045857572                                              | 0.003769608                                                 | 26.78082192                                    |
| 0.0479152                                                | 0.007549517                                                 | 70.57909029                                    |
| 0.064770761                                              | 0.018798968                                                 | 8.808823529                                    |
| 0.051546079                                              | 0.004428787                                                 | 81.6489899                                     |
| 0.049153125                                              | 0.010924862                                                 | 21.3816092                                     |
| 0.067985817                                              | 0.008742505                                                 | 40.65551839                                    |
| 0.043987001                                              | 0.007680012                                                 | 39.67627494                                    |
| 0.051852889                                              | 0.013190831                                                 | 27.01535509                                    |
| 0.055567738                                              | 0.013908511                                                 | 16.78145695                                    |
| 0.050818557                                              | 0.008729328                                                 | 42.73840666                                    |
| 0.057354615                                              | 0.00706698                                                  | 67.16225448                                    |
| 0.065439364                                              | 0.032588644                                                 | 9.226950355                                    |
| 0.050988554                                              | 0.022917126                                                 | 6.322580645                                    |
| 0.0528125                                                | 0.015955509                                                 | 8.45                                           |
| 0.050139071                                              | 0.01087523                                                  | 23.36480687                                    |
| 0.045736242                                              | 0.008822799                                                 | 39.56184971                                    |
| 0.059112341                                              | 0.012032418                                                 | 50.65927655                                    |
| 0.055687673                                              | 0.009902331                                                 | 19.37931034                                    |
| 0.039831769                                              | 0.012909651                                                 | 11.909699                                      |
| 0.050324389                                              | 0.013728779                                                 | 21.08591885                                    |
| 0.053778297                                              | 0.009342308                                                 | 52.16494845                                    |
| 0.05152375                                               | 0.009137973                                                 | 32.61453397                                    |
| 0.054828475                                              | 0.012197392                                                 | 13.48780488                                    |
| 0.054712604                                              | 0.009318858                                                 | 83.43672131                                    |
| 0.050053979                                              | 0.01408885                                                  | 21.27294118                                    |
| 0.042090069                                              | 0.006707848                                                 | 35.10311751                                    |
| 0.04509936                                               | 0.004007114                                                 | 102.9167397                                    |
| 0.044614474                                              | 0.008792596                                                 | 26.63484087                                    |
| 0.057696052                                              | 0.022306612                                                 | 12.40465116                                    |
| 0.045694331                                              | 0.005883333                                                 | 47.97904762                                    |
| 0.052802768                                              | 0.015303603                                                 | 8.976470588                                    |
| 0.049252611                                              | 0.006644983                                                 | 65.11195159                                    |
| 0.058894278                                              | 0.008629148                                                 | 74.91352201                                    |
| 0.050180072                                              | 0.009791536                                                 | 29.85714286                                    |
| 0.054235537                                              | 0.024382761                                                 | 9.545454545                                    |
| 0.047128669                                              | 0.010449931                                                 | 63.6237037                                     |
| 0.0459961                                                | 0.016748614                                                 | 22.6300813                                     |
| 0.058470398                                              | 0.019235302                                                 | 19.06134969                                    |
| 0.051634324                                              | 0.006105603                                                 | 38.31266846                                    |
| 0.06838843                                               | 0.030710438                                                 | 15.04545455                                    |
| 0.048376449                                              | 0.010923934                                                 | 27.67132867                                    |
| 0.045100416                                              | 0.012293912                                                 | 6.855263158                                    |
| 0.049408642                                              | 0.013804594                                                 | 19.46700508                                    |
| 0.059949511                                              | 0.013887246                                                 | 20.56268222                                    |
| 0.043127996                                              | 0.011542012                                                 | 22.38342967                                    |
| 0.052461573                                              | 0.013906697                                                 | 14.05970149                                    |
| 0.054171244                                              | 0.013337481                                                 | 39.59917921                                    |
| 0.06272122                                               | 0.012667017                                                 | 25.21393035                                    |
| 0.049178599                                              | 0.012189387                                                 | 31.03169572                                    |
| 0.044090577                                              | 0.009978984                                                 | 8.156756757                                    |
| 0.056740991                                              | 0.011295865                                                 | 22.58291457                                    |
| 0.050962987                                              | 0.009882165                                                 | 40.26075949                                    |
| 0.057627812                                              | 0.012716425                                                 | 24.83758701                                    |
| 0.045682182                                              | 0.020568442                                                 | 19.91743119                                    |
| 0.04359714                                               | 0.009106543                                                 | 11.24806202                                    |
| 0.052515197                                              | 0.006469245                                                 | 25.41735537                                    |
| 0.057747716                                              | 0.007076109                                                 | 53.70537634                                    |
| 0.049459775                                              | 0.012158101                                                 | 40.75485437                                    |
| 0.067183573                                              | 0.01117934                                                  | 37.01814882                                    |
| 0.040138357                                              | 0.008401992                                                 | 36.96742671                                    |
| 0.049134694                                              | 0.019602823                                                 | 34.39428571                                    |
| 0.054710744                                              | 0.018995758                                                 | 6.018181818                                    |
| 0.064897959                                              | 0.031042283                                                 | 4.542857143                                    |
| 0.047596938                                              | 0.005507621                                                 | 107.807064                                     |

| log.sigma.5.0.mm.3D_gldzm_HighIntensityLargeDistanceEmphasis | log.sigma.5.0.mm.3D_gldzm_SmallDistanceEmphasis | log.sigma.5.0.mm.3D_glcm_SumVariance | log.sigma.5.0.mm.3D_glcm_Homogeneity1 |
|--------------------------------------------------------------|-------------------------------------------------|--------------------------------------|---------------------------------------|
| 381.3782772                                                  | 0.956460674                                     | 840.0306379                          | 0.317882254                           |
| 389.5512821                                                  | 0.995192308                                     | 995.6755194                          | 0.286227983                           |
| 426.4601227                                                  | 0.960889571                                     | 978.6755274                          | 0.299343267                           |
| 399.2051282                                                  | 0.951923077                                     | 870.717205                           | 0.275932725                           |
| 241.5882353                                                  | 0.95418552                                      | 510.0179452                          | 0.334986314                           |
| 336.2912621                                                  | 0.970873786                                     | 801.8076448                          | 0.308089153                           |
| 210.4590261                                                  | 0.972387173                                     | 356.8447657                          | 0.494312434                           |
| 347.3498212                                                  | 0.970947557                                     | 700.0466923                          | 0.37761199                            |
| 240.9533404                                                  | 0.984888653                                     | 393.3942316                          | 0.420275582                           |
| 240.7387387                                                  | 0.972972973                                     | 467.9796926                          | 0.3637751                             |
| 139.0575221                                                  | 0.976769912                                     | 229.3745135                          | 0.466531677                           |
| 220.3917526                                                  | 0.975699558                                     | 371.1157731                          | 0.450753603                           |
| 368.7826087                                                  | 0.941770186                                     | 898.68877                            | 0.303158591                           |
| 399.0097403                                                  | 0.931818182                                     | 822.4886098                          | 0.273008154                           |
| 230.2300195                                                  | 0.976608187                                     | 377.2232484                          | 0.361721424                           |
| 226.2195652                                                  | 0.988043478                                     | 475.9474133                          | 0.431662485                           |
| 131.2333333                                                  | 1                                               | 218.4158198                          | 0.425839198                           |
| 374.2797927                                                  | 0.937823834                                     | 823.3390563                          | 0.278095804                           |
| 151.8871795                                                  | 0.976923077                                     | 211.5701427                          | 0.458903625                           |
| 814.669664                                                   | 0.982252721                                     | 2363.527953                          | 0.390083437                           |
| 224.3835846                                                  | 0.981155779                                     | 516.2642202                          | 0.34774626                            |
| 319.9285714                                                  | 0.953557143                                     | 730.9598294                          | 0.341354568                           |
| 256.8695652                                                  | 0.974637681                                     | 555.3915847                          | 0.335534463                           |
| 197.592233                                                   | 0.983980583                                     | 317.0657721                          | 0.502548377                           |
| 393.5669291                                                  | 0.980314961                                     | 904.2780075                          | 0.368013013                           |
| 319.5555556                                                  | 0.981927711                                     | 655.2617388                          | 0.367840458                           |
| 361.7197724                                                  | 0.978662873                                     | 753.8882394                          | 0.327690218                           |
| 204.9081836                                                  | 0.980538922                                     | 364.1079701                          | 0.408411371                           |
| 142.8285714                                                  | 0.978571429                                     | 322.7677631                          | 0.458068476                           |
| 216.5969828                                                  | 0.993534483                                     | 438.1013526                          | 0.366496034                           |
| 251.1293346                                                  | 0.985238988                                     | 482.3226708                          | 0.373577779                           |
| 341.1953642                                                  | 0.960264901                                     | 819.2821262                          | 0.30036352                            |
| 324.450237                                                   | 0.956161137                                     | 629.2842512                          | 0.380233175                           |
| 248.8243478                                                  | 0.98826087                                      | 557.1865635                          | 0.412756363                           |
| 262.2616192                                                  | 0.977511244                                     | 484.7038322                          | 0.395424667                           |
| 345.3047473                                                  | 0.928790199                                     | 772.3765925                          | 0.336274974                           |
| 486.1164384                                                  | 0.862585616                                     | 1033.624509                          | 0.304673458                           |
| 330.6877122                                                  | 0.978105906                                     | 679.6715723                          | 0.451242177                           |
| 194.9632353                                                  | 0.950367647                                     | 408.2686081                          | 0.367959513                           |
| 434.7190657                                                  | 0.982954545                                     | 979.6504932                          | 0.46275096                            |
| 297.7103448                                                  | 0.956896552                                     | 570.0921243                          | 0.33140598                            |
| 258.6727755                                                  | 0.97993311                                      | 474.8630771                          | 0.535610938                           |
| 378.1640798                                                  | 0.978381375                                     | 891.9713709                          | 0.307737043                           |
| 266.7504798                                                  | 0.964011516                                     | 528.4798814                          | 0.327847446                           |
| 243.1125828                                                  | 0.955298013                                     | 415.842817                           | 0.45570891                            |
| 288.0868014                                                  | 0.975921522                                     | 621.9535551                          | 0.341186964                           |
| 275.0700256                                                  | 0.986549957                                     | 579.1120982                          | 0.416996987                           |
| 138.0851064                                                  | 0.994680851                                     | 278.7668555                          | 0.376721788                           |
| 240.7419355                                                  | 0.951612903                                     | 405.1227249                          | 0.35053448                            |
| 270.51875                                                    | 0.9859375                                       | 654.7153146                          | 0.323509187                           |
| 257.8497854                                                  | 0.995171674                                     | 444.9577709                          | 0.348653515                           |
| 391.8034682                                                  | 0.967919075                                     | 897.5570613                          | 0.348645525                           |
| 213.7082847                                                  | 0.971995333                                     | 348.8222179                          | 0.558222433                           |
| 298.5632184                                                  | 0.974137931                                     | 613.349925                           | 0.422841097                           |
| 412.8294314                                                  | 0.959866221                                     | 1045.767997                          | 0.274887086                           |
| 246.300716                                                   | 0.980310263                                     | 526.4417129                          | 0.325581099                           |
| 248.5237113                                                  | 0.98685567                                      | 474.6975084                          | 0.407136092                           |
| 276.6334913                                                  | 0.97985782                                      | 595.3492588                          | 0.33504955                            |
| 320.4634146                                                  | 0.948170732                                     | 683.6692782                          | 0.344018717                           |
| 264.1265574                                                  | 0.977868852                                     | 537.320893                           | 0.522860007                           |
| 257.68                                                       | 0.978823529                                     | 535.1107994                          | 0.359160819                           |
| 420.0071942                                                  | 0.964028777                                     | 1048.206396                          | 0.33168661                            |
| 508.6397897                                                  | 0.95302366                                      | 1121.697643                          | 0.371377937                           |
| 367.6247906                                                  | 0.945979899                                     | 802.4848478                          | 0.356577148                           |
| 179.172093                                                   | 0.986046512                                     | 357.8101348                          | 0.361962442                           |
| 416.8704762                                                  | 0.959285714                                     | 1000.071428                          | 0.337306774                           |
| 339.8235294                                                  | 0.947058824                                     | 749.2490966                          | 0.29456657                            |
| 365.6369138                                                  | 0.956316188                                     | 701.0466309                          | 0.375913506                           |
| 237.5125786                                                  | 0.987028302                                     | 501.4024998                          | 0.433441177                           |
| 269.8806723                                                  | 0.978571429                                     | 712.3923173                          | 0.354591498                           |
| 204.9090909                                                  | 0.991477273                                     | 397.9754096                          | 0.329142805                           |
| 282.9837037                                                  | 0.978333333                                     | 592.0398428                          | 0.381704107                           |
| 250.504065                                                   | 0.980182927                                     | 514.4463651                          | 0.309860687                           |
| 167.904908                                                   | 0.995398773                                     | 313.9275318                          | 0.373466586                           |
| 354.1105121                                                  | 0.92198263                                      | 558.6039554                          | 0.442540273                           |
| 119.7818182                                                  | 0.989772727                                     | 227.5681329                          | 0.39061106                            |
| 286.6695804                                                  | 0.976398601                                     | 706.8342543                          | 0.372191229                           |
| 559.3289474                                                  | 0.901315789                                     | 1282.669132                          | 0.269114577                           |
| 290.5786802                                                  | 0.967639594                                     | 683.5429766                          | 0.358094353                           |
| 216.3702624                                                  | 0.984693878                                     | 417.839331                           | 0.42928775                            |
| 375.2350674                                                  | 0.958092486                                     | 826.3382417                          | 0.318977544                           |
| 259.9589552                                                  | 0.991604478                                     | 795.3037958                          | 0.342027073                           |
| 204.9548564                                                  | 0.990766074                                     | 379.3115927                          | 0.371828298                           |
| 215.4104478                                                  | 0.983208955                                     | 384.5361477                          | 0.40551417                            |
| 277.3613312                                                  | 0.964342314                                     | 519.1737849                          | 0.410751251                           |
| 514.5351351                                                  | 0.967567568                                     | 1428.686787                          | 0.318342681                           |
| 253.758794                                                   | 0.954773869                                     | 508.4323579                          | 0.365798052                           |
| 254.9974684                                                  | 0.990506329                                     | 444.966039                           | 0.471295059                           |
| 216.6542923                                                  | 0.987819026                                     | 441.3553477                          | 0.403373491                           |
| 254.7706422                                                  | 0.977637615                                     | 545.7852301                          | 0.335814366                           |
| 592.9573643                                                  | 0.909883721                                     | 1278.093755                          | 0.341413369                           |
| 308.4545455                                                  | 0.976756198                                     | 613.1726659                          | 0.428075267                           |
| 295.7419355                                                  | 0.97983871                                      | 648.6333583                          | 0.409538694                           |
| 252.8774272                                                  | 0.985436893                                     | 522.41531                            | 0.380505153                           |
| 205.8675136                                                  | 0.983161928                                     | 401.3943379                          | 0.436731135                           |
| 388.3159609                                                  | 0.93485342                                      | 836.4882949                          | 0.300481803                           |
| 240.2042857                                                  | 0.952857143                                     | 465.1192113                          | 0.354150924                           |
| 288.9727273                                                  | 0.965909091                                     | 649.6249711                          | 0.335906461                           |
| 163.9571429                                                  | 0.989285714                                     | 392.5169046                          | 0.357042292                           |
| 380.1496689                                                  | 0.970198675                                     | 963.9148244                          | 0.374075594                           |

| log.sigma.5.0.mm.3D_glc_m_Homogeneity2 | log.sigma.5.0.mm.3D_glc_m_ClusterShade | log.sigma.5.0.mm.3D_glc_m_MaximumProbability | log.sigma.5.0.mm.3D_glc_m_Idmn | log.sigma.5.0.mm.3D_glc_m_SumVariance2 |
|----------------------------------------|----------------------------------------|----------------------------------------------|--------------------------------|----------------------------------------|
| 0.224144292                            | 212.5089898                            | 0.009329141                                  | 0.977842035                    | 118.4355011                            |
| 0.191514484                            | -220.5376038                           | 0.015266779                                  | 0.970808667                    | 124.2962344                            |
| 0.207659744                            | -132.2678048                           | 0.012535419                                  | 0.974521567                    | 103.4165293                            |
| 0.180251034                            | -77.26503853                           | 0.01521097                                   | 0.968990336                    | 128.9397141                            |
| 0.241278288                            | 61.83486393                            | 0.010701892                                  | 0.977240142                    | 101.7308356                            |
| 0.211846812                            | -325.4937308                           | 0.017027316                                  | 0.972260918                    | 123.9487677                            |
| 0.431080528                            | 292.5188448                            | 0.070702311                                  | 0.990865986                    | 57.59536187                            |
| 0.295519549                            | 333.1040311                            | 0.020907104                                  | 0.984500591                    | 83.71751673                            |
| 0.34535755                             | 445.9696717                            | 0.036853637                                  | 0.982102552                    | 70.33276254                            |
| 0.273326796                            | 79.52071294                            | 0.014742939                                  | 0.979593267                    | 74.90268407                            |
| 0.396854017                            | 94.46896806                            | 0.043046684                                  | 0.981893795                    | 34.18923094                            |
| 0.380817647                            | 207.5540955                            | 0.040448393                                  | 0.986747514                    | 56.55070768                            |
| 0.210407624                            | -385.1817199                           | 0.013155017                                  | 0.973579099                    | 116.7605789                            |
| 0.176645667                            | -570.4602449                           | 0.012724751                                  | 0.970895094                    | 136.8326926                            |
| 0.275806608                            | 388.6380288                            | 0.01786711                                   | 0.979598722                    | 79.91919617                            |
| 0.362114741                            | 242.1440548                            | 0.0531624                                    | 0.980412338                    | 76.86081161                            |
| 0.346010184                            | 67.03900998                            | 0.023230806                                  | 0.977922288                    | 37.81960129                            |
| 0.183227804                            | -222.4723145                           | 0.014018541                                  | 0.971258614                    | 144.9447281                            |
| 0.388969907                            | 72.52480901                            | 0.048002511                                  | 0.981407755                    | 34.10061523                            |
| 0.306771489                            | 316.1274448                            | 0.021849763                                  | 0.993218745                    | 73.88777562                            |
| 0.257108345                            | -71.48020842                           | 0.010800224                                  | 0.973192624                    | 90.39643348                            |
| 0.249667577                            | -410.7910321                           | 0.018387995                                  | 0.973533962                    | 89.94539009                            |
| 0.244028576                            | 48.29569049                            | 0.017104827                                  | 0.978152389                    | 84.95855387                            |
| 0.441256698                            | 89.1159395                             | 0.0828085                                    | 0.989098835                    | 39.22699988                            |
| 0.286554136                            | 101.3890581                            | 0.032999556                                  | 0.98097481                     | 102.3898637                            |
| 0.282558348                            | 407.3630491                            | 0.016560008                                  | 0.985027701                    | 101.0496909                            |
| 0.235839472                            | 176.2691621                            | 0.013084769                                  | 0.978401219                    | 91.37978321                            |
| 0.326568363                            | 85.87680172                            | 0.020517552                                  | 0.983008089                    | 55.50697883                            |
| 0.383031716                            | 24.40160235                            | 0.050393554                                  | 0.983267349                    | 31.40042874                            |
| 0.2769415                              | 120.8074754                            | 0.014112897                                  | 0.982721591                    | 66.01023827                            |
| 0.289077351                            | 363.8919571                            | 0.014612431                                  | 0.981082297                    | 82.00301624                            |
| 0.204673318                            | -256.9177592                           | 0.012382597                                  | 0.968102344                    | 99.18795649                            |
| 0.29662553                             | 453.1262381                            | 0.020062881                                  | 0.986760562                    | 92.37712895                            |
| 0.33542975                             | 195.1941576                            | 0.024314149                                  | 0.986428999                    | 72.47549304                            |
| 0.31435867                             | 329.7413408                            | 0.018080053                                  | 0.984536899                    | 74.00688878                            |
| 0.246886878                            | -227.9212998                           | 0.015683658                                  | 0.974007936                    | 95.82110176                            |
| 0.211417995                            | -492.1655329                           | 0.012120296                                  | 0.974552486                    | 107.3292409                            |
| 0.383511802                            | 213.9848285                            | 0.088489624                                  | 0.985891598                    | 86.47989555                            |
| 0.276792435                            | -178.7619421                           | 0.018683552                                  | 0.972253106                    | 60.77037981                            |
| 0.394237411                            | 234.1685949                            | 0.040131781                                  | 0.993295632                    | 57.9915118                             |
| 0.238186701                            | 132.1423476                            | 0.01051775                                   | 0.978620138                    | 102.1208906                            |
| 0.480627505                            | 91.12253376                            | 0.087987745                                  | 0.993958336                    | 32.03435032                            |
| 0.216879187                            | 155.7969635                            | 0.010517713                                  | 0.976443274                    | 120.7880667                            |
| 0.233180246                            | 312.1553215                            | 0.009201441                                  | 0.980626326                    | 104.6256083                            |
| 0.38740392                             | 146.0103169                            | 0.043899425                                  | 0.987686948                    | 53.41307788                            |
| 0.25186997                             | 118.5278475                            | 0.013082886                                  | 0.976599558                    | 93.22637631                            |
| 0.338095394                            | 117.1050115                            | 0.022084884                                  | 0.988060718                    | 58.54777652                            |
| 0.289370214                            | -63.86222299                           | 0.024059919                                  | 0.970784797                    | 46.64631214                            |
| 0.257121155                            | 551.9962517                            | 0.017825167                                  | 0.980600201                    | 100.8858384                            |
| 0.227684146                            | -102.5235                              | 0.015309802                                  | 0.97273173                     | 88.20649813                            |
| 0.258700139                            | 574.8458034                            | 0.015565749                                  | 0.979867565                    | 94.56118546                            |
| 0.258337843                            | 208.431699                             | 0.010465279                                  | 0.983892753                    | 91.57345631                            |
| 0.507993187                            | 141.4582075                            | 0.103552451                                  | 0.992085098                    | 34.83170791                            |
| 0.346215713                            | 152.246717                             | 0.023378801                                  | 0.9867109                      | 52.35306313                            |
| 0.179372073                            | -505.1487706                           | 0.010982701                                  | 0.970211955                    | 151.4336501                            |
| 0.230822257                            | 269.9399444                            | 0.010043898                                  | 0.97383856                     | 103.7219602                            |
| 0.328737514                            | 285.3970246                            | 0.02425904                                   | 0.986516986                    | 74.14224347                            |
| 0.242974296                            | 86.45483409                            | 0.010250358                                  | 0.975623666                    | 81.47609759                            |
| 0.252463671                            | -154.3711058                           | 0.015074958                                  | 0.976377736                    | 75.97584356                            |
| 0.463738824                            | 34.37288301                            | 0.12269317                                   | 0.991823975                    | 48.20942719                            |
| 0.270474327                            | 255.6980276                            | 0.014795822                                  | 0.982069611                    | 73.08794012                            |
| 0.239856418                            | 251.2282079                            | 0.014788449                                  | 0.985014168                    | 112.0994089                            |
| 0.287426139                            | 360.3558342                            | 0.019997908                                  | 0.988052694                    | 95.07693864                            |
| 0.267163718                            | -18.55239328                           | 0.012730585                                  | 0.984957072                    | 104.312531                             |
| 0.271449799                            | 47.27614943                            | 0.017017173                                  | 0.975889748                    | 57.98553307                            |
| 0.244426976                            | 242.4681693                            | 0.011564706                                  | 0.986517352                    | 93.97466291                            |
| 0.199007474                            | -453.0996819                           | 0.013894766                                  | 0.964885929                    | 98.57456019                            |
| 0.289830648                            | 359.1020567                            | 0.015643416                                  | 0.987095947                    | 83.54487645                            |
| 0.357940316                            | 140.8190986                            | 0.021345361                                  | 0.990153249                    | 59.42011438                            |
| 0.263628134                            | 30.59306682                            | 0.014986474                                  | 0.979986137                    | 77.5412216                             |
| 0.235401186                            | 41.29555368                            | 0.015311854                                  | 0.968034285                    | 84.35764724                            |
| 0.301496927                            | 181.8148313                            | 0.031856505                                  | 0.981523221                    | 86.55212741                            |
| 0.216490839                            | 221.1759342                            | 0.009569774                                  | 0.971657634                    | 107.7438344                            |
| 0.285348479                            | 182.3525102                            | 0.016635717                                  | 0.981160757                    | 59.99316799                            |
| 0.369722736                            | 346.2366092                            | 0.038726105                                  | 0.99029999                     | 76.30126536                            |
| 0.303317221                            | -0.265704529                           | 0.02303418                                   | 0.972035969                    | 44.73778334                            |
| 0.285315943                            | 48.89902333                            | 0.013622725                                  | 0.985011954                    | 79.30338964                            |
| 0.175696098                            | -785.0785238                           | 0.015439007                                  | 0.967703755                    | 131.7622723                            |
| 0.267308078                            | 5.7966684                              | 0.013328648                                  | 0.980040799                    | 83.2558497                             |
| 0.35288519                             | 42.73591275                            | 0.025316429                                  | 0.987477749                    | 47.95137013                            |
| 0.225289281                            | 229.1285869                            | 0.009495367                                  | 0.978105972                    | 119.3310928                            |
| 0.248541427                            | -252.7545393                           | 0.015086203                                  | 0.977144366                    | 88.37757472                            |
| 0.287366643                            | 146.0092414                            | 0.032319163                                  | 0.977793513                    | 70.28354793                            |
| 0.322752054                            | 99.76099973                            | 0.022709522                                  | 0.986180561                    | 51.58177715                            |
| 0.333844945                            | 295.8054435                            | 0.032080489                                  | 0.984979764                    | 79.16830669                            |
| 0.228467746                            | -480.4791296                           | 0.023075026                                  | 0.980447177                    | 101.0929903                            |
| 0.278919092                            | 61.55740556                            | 0.012804968                                  | 0.980324577                    | 77.32820869                            |
| 0.406544894                            | 301.2517958                            | 0.081263647                                  | 0.98687806                     | 68.24030561                            |
| 0.32214952                             | 112.7197625                            | 0.025399445                                  | 0.984155489                    | 54.44933367                            |
| 0.242703609                            | 147.9715497                            | 0.011508793                                  | 0.976339126                    | 103.1163189                            |
| 0.252486951                            | -54.21898106                           | 0.017790514                                  | 0.980086458                    | 104.483839                             |
| 0.352961149                            | 19.99680529                            | 0.030571791                                  | 0.986597447                    | 59.93818659                            |
| 0.327119485                            | 114.7212081                            | 0.01655726                                   | 0.989339717                    | 59.38903315                            |
| 0.294608672                            | 275.7990664                            | 0.014960326                                  | 0.985634239                    | 78.7561679                             |
| 0.35925681                             | 61.22280518                            | 0.018642641                                  | 0.986787001                    | 45.12762861                            |
| 0.20703031                             | 189.9106857                            | 0.008583146                                  | 0.977520324                    | 129.4323893                            |
| 0.264431642                            | 127.1080604                            | 0.010191675                                  | 0.980223652                    | 88.74760307                            |
| 0.243900416                            | -197.3915397                           | 0.021805464                                  | 0.971044237                    | 79.85104222                            |
| 0.266702275                            | -159.3123924                           | 0.025524537                                  | 0.967756345                    | 50.11166614                            |
| 0.288561911                            | 110.8375681                            | 0.016306353                                  | 0.985860603                    | 80.16363441                            |

| log.sigma.5.0.mm.3D_glcmm_Contrast | log.sigma.5.0.mm.3D_glcmm_DifferenceEntropy | log.sigma.5.0.mm.3D_glcmm_InverseVariance | log.sigma.5.0.mm.3D_glcmm_Entropy | log.sigma.5.0.mm.3D_glcmm_Dissimilarity |
|------------------------------------|---------------------------------------------|-------------------------------------------|-----------------------------------|-----------------------------------------|
| 24.15288323                        | 3.351590294                                 | 0.226522163                               | 8.430392346                       | 3.907251087                             |
| 32.2178867                         | 3.47356734                                  | 0.194948234                               | 7.860591228                       | 4.585541177                             |
| 29.51934172                        | 3.386035644                                 | 0.207470658                               | 8.228723532                       | 4.39722511                              |
| 34.55554586                        | 3.5053507                                   | 0.192426882                               | 7.921987229                       | 4.741299565                             |
| 19.06301249                        | 3.186481328                                 | 0.250917484                               | 8.189248669                       | 3.475431838                             |
| 23.37232146                        | 3.250985905                                 | 0.220216091                               | 7.573473696                       | 3.923341677                             |
| 10.42787737                        | 2.790199449                                 | 0.33301095                                | 7.211628997                       | 2.192847638                             |
| 18.88446422                        | 3.213157922                                 | 0.281948201                               | 8.149218862                       | 3.268486116                             |
| 14.98924824                        | 3.032089489                                 | 0.307635718                               | 7.660495217                       | 2.826479086                             |
| 14.60200375                        | 2.979898809                                 | 0.275472756                               | 7.666179435                       | 3.042032108                             |
| 7.698950504                        | 2.597406614                                 | 0.361299349                               | 6.798816989                       | 2.076993765                             |
| 10.93728682                        | 2.850142761                                 | 0.343357101                               | 7.401986505                       | 2.397228767                             |
| 29.15415228                        | 3.413794111                                 | 0.217592793                               | 8.279701923                       | 4.283458077                             |
| 34.2053079                         | 3.492713512                                 | 0.186741638                               | 8.348789466                       | 4.758385201                             |
| 19.82945158                        | 3.210014286                                 | 0.27726287                                | 7.947431918                       | 3.36275382                              |
| 17.79015971                        | 3.034667056                                 | 0.304605306                               | 7.726909665                       | 2.975264452                             |
| 8.553357016                        | 2.667979623                                 | 0.34799429                                | 6.995815116                       | 2.272986399                             |
| 33.86688132                        | 3.494136141                                 | 0.199401213                               | 8.144053146                       | 4.690016264                             |
| 7.941404564                        | 2.604504585                                 | 0.372752422                               | 6.778401113                       | 2.109289598                             |
| 14.767858                          | 3.034311015                                 | 0.303716047                               | 7.931306514                       | 2.891160733                             |
| 18.15409722                        | 3.146308415                                 | 0.266792918                               | 8.107567527                       | 3.348825483                             |
| 19.24017027                        | 3.171938075                                 | 0.249160008                               | 7.695748686                       | 3.482881263                             |
| 19.55118873                        | 3.169646645                                 | 0.260532535                               | 7.819313127                       | 3.509934017                             |
| 7.749359501                        | 2.624575504                                 | 0.365853071                               | 6.853389681                       | 1.949962897                             |
| 23.49546893                        | 3.269730924                                 | 0.26769822                                | 8.081464189                       | 3.59674077                              |
| 18.21346438                        | 3.168878973                                 | 0.280857892                               | 8.153299707                       | 3.253831359                             |
| 23.66432929                        | 3.284507512                                 | 0.239919575                               | 8.215834935                       | 3.799494235                             |
| 11.21695348                        | 2.869798743                                 | 0.318510541                               | 7.535501432                       | 2.579744073                             |
| 6.36009955                         | 2.41510505                                  | 0.364004461                               | 6.054906577                       | 1.967282377                             |
| 14.29515332                        | 2.974097432                                 | 0.29111357                                | 7.722842843                       | 2.975590532                             |
| 16.9161784                         | 3.094615455                                 | 0.288752044                               | 8.00554828                        | 3.146484208                             |
| 27.20570031                        | 3.381791097                                 | 0.204413143                               | 8.171666225                       | 4.208586711                             |
| 16.01401406                        | 3.077243151                                 | 0.297433396                               | 8.029693508                       | 3.043888735                             |
| 14.59530884                        | 3.016888124                                 | 0.306905048                               | 7.70538091                        | 2.822037218                             |
| 14.72786357                        | 3.046603259                                 | 0.309593293                               | 7.87208251                        | 2.879807797                             |
| 23.62319523                        | 3.3135741                                   | 0.239421515                               | 8.295464251                       | 3.785908129                             |
| 30.16898278                        | 3.329592005                                 | 0.225132909                               | 8.357473487                       | 4.2591693                               |
| 17.26015764                        | 3.079064059                                 | 0.287025591                               | 7.694058689                       | 2.886426413                             |
| 13.20420664                        | 2.827312696                                 | 0.282508481                               | 7.328788159                       | 2.910226207                             |
| 9.98267404                         | 2.794494608                                 | 0.353881996                               | 7.409666706                       | 2.254452748                             |
| 20.44624153                        | 3.220579135                                 | 0.24345219                                | 8.205737752                       | 3.598295198                             |
| 5.232582888                        | 2.39216956                                  | 0.397228143                               | 6.46720541                        | 1.607618101                             |
| 30.9589866                         | 3.347714455                                 | 0.216933654                               | 8.507331569                       | 4.356451897                             |
| 19.64426124                        | 3.182798851                                 | 0.246074272                               | 8.200328684                       | 3.55492489                              |
| 10.92368315                        | 2.819514227                                 | 0.351810943                               | 7.171580808                       | 2.362790366                             |
| 21.07973483                        | 3.25787847                                  | 0.253315483                               | 8.260574796                       | 3.597313372                             |
| 11.98044321                        | 2.918067157                                 | 0.320124269                               | 7.622053358                       | 2.599669452                             |
| 12.67168305                        | 2.902685305                                 | 0.304337134                               | 7.194046246                       | 2.828474749                             |
| 16.13250226                        | 3.041953546                                 | 0.263823104                               | 7.601737593                       | 3.187816501                             |
| 19.82071423                        | 3.168089359                                 | 0.234817833                               | 7.726963102                       | 3.607031932                             |
| 19.25696251                        | 3.202396671                                 | 0.25708138                                | 7.945088655                       | 3.432482116                             |
| 18.48172114                        | 3.182491985                                 | 0.269374425                               | 8.21800921                        | 3.350668374                             |
| 6.471288923                        | 2.484448237                                 | 0.365324752                               | 6.431565837                       | 1.676722874                             |
| 11.77106764                        | 2.829383022                                 | 0.335432513                               | 7.320686737                       | 2.543303012                             |
| 35.03252862                        | 3.538831429                                 | 0.183181771                               | 8.457322074                       | 4.808645666                             |
| 20.51042584                        | 3.21702092                                  | 0.238354743                               | 8.172800878                       | 3.63162325                              |
| 14.49938141                        | 3.001209041                                 | 0.311329502                               | 7.787849222                       | 2.827328822                             |
| 20.45635937                        | 3.231062184                                 | 0.24468159                                | 8.085168152                       | 3.590711228                             |
| 18.40623458                        | 3.143987403                                 | 0.255944846                               | 7.860085785                       | 3.405389939                             |
| 8.724353953                        | 2.681468444                                 | 0.328310141                               | 6.983291828                       | 1.989002148                             |
| 17.06186706                        | 3.121294186                                 | 0.276310596                               | 7.89429172                        | 3.219775741                             |
| 21.42615603                        | 3.271878049                                 | 0.244797637                               | 8.415052303                       | 3.661915034                             |
| 18.97864364                        | 3.198657869                                 | 0.282857069                               | 8.269602643                       | 3.276947858                             |
| 18.2869164                         | 3.180388582                                 | 0.266201672                               | 8.257570672                       | 3.306133506                             |
| 14.89989179                        | 3.00474157                                  | 0.280643831                               | 7.553480702                       | 3.05315494                              |
| 19.20126072                        | 3.206501507                                 | 0.251340736                               | 8.283286019                       | 3.478044017                             |
| 28.15290292                        | 3.358029914                                 | 0.210994206                               | 7.83999718                        | 4.274810671                             |
| 15.58386281                        | 3.083811216                                 | 0.289163915                               | 8.040975984                       | 3.033224152                             |
| 9.808377968                        | 2.785059177                                 | 0.34861833                                | 7.493955573                       | 2.35489496                              |
| 16.64205588                        | 3.108813933                                 | 0.265323281                               | 7.995722244                       | 3.224953088                             |
| 19.98894046                        | 3.122916082                                 | 0.238544249                               | 7.655312366                       | 3.60473533                              |
| 20.16614785                        | 3.240307487                                 | 0.276955787                               | 8.137315747                       | 3.343816823                             |
| 25.7211562                         | 3.35951141                                  | 0.222093421                               | 8.300164858                       | 4.062846144                             |
| 13.48819889                        | 2.948206532                                 | 0.300186487                               | 7.520122834                       | 2.887025383                             |
| 12.3755941                         | 2.924587178                                 | 0.321547482                               | 7.65794084                        | 2.532160215                             |
| 10.86001629                        | 2.771477849                                 | 0.303405576                               | 7.172354791                       | 2.639379734                             |
| 15.10809373                        | 3.054233354                                 | 0.291186062                               | 7.965900963                       | 3.020905172                             |
| 38.2000002                         | 3.573080729                                 | 0.188393161                               | 7.878713651                       | 5.012930683                             |
| 15.46876651                        | 3.040863521                                 | 0.27857139                                | 7.960337109                       | 3.107079253                             |
| 10.28873996                        | 2.810101018                                 | 0.344095145                               | 7.318332947                       | 2.404562077                             |
| 23.84855389                        | 3.34093459                                  | 0.22801409                                | 8.421320253                       | 3.881944911                             |
| 17.7400226                         | 3.104991837                                 | 0.251037592                               | 7.889863339                       | 3.367732147                             |
| 18.68259398                        | 3.163662639                                 | 0.268094002                               | 7.892177254                       | 3.301276899                             |
| 11.35911266                        | 2.858835078                                 | 0.319385864                               | 7.468152315                       | 2.587053816                             |
| 14.26890205                        | 2.992856511                                 | 0.31771133                                | 7.769715774                       | 2.799716303                             |
| 26.81354819                        | 3.397741845                                 | 0.238148461                               | 7.785100996                       | 4.060284302                             |
| 16.41238762                        | 3.079414152                                 | 0.288325622                               | 7.895914643                       | 3.139422997                             |
| 12.50917354                        | 2.905730788                                 | 0.330585217                               | 7.401943427                       | 2.447001166                             |
| 12.17495339                        | 2.914341712                                 | 0.321359015                               | 7.513022021                       | 2.666811607                             |
| 19.88136709                        | 3.21361954                                  | 0.245062402                               | 8.216480841                       | 3.534505189                             |
| 21.74780956                        | 3.259988691                                 | 0.260081359                               | 8.025850415                       | 3.606217881                             |
| 11.89380838                        | 2.87362616                                  | 0.336933608                               | 7.486644713                       | 2.532806404                             |
| 10.61653434                        | 2.836072365                                 | 0.322398156                               | 7.593043708                       | 2.519111151                             |
| 14.45497031                        | 3.024149449                                 | 0.292716761                               | 7.94158578                        | 2.941433236                             |
| 7.948636136                        | 2.611223542                                 | 0.35685058                                | 7.152001906                       | 2.180098323                             |
| 29.42679153                        | 3.479186888                                 | 0.215763343                               | 8.708289228                       | 4.301565073                             |
| 17.66445168                        | 3.133485044                                 | 0.267287321                               | 8.107744044                       | 3.292397962                             |
| 19.66508834                        | 3.152086254                                 | 0.25413644                                | 7.480873                          | 3.520133595                             |
| 15.56021417                        | 3.001020222                                 | 0.278102565                               | 7.069123272                       | 3.133331577                             |
| 17.18631693                        | 3.134005506                                 | 0.281708718                               | 8.126714291                       | 3.150452994                             |

| log.sigma.5.0.mm.3D_glcml_DifferenceVariance | log.sigma.5.0.mm.3D_glcml_Idn | log.sigma.5.0.mm.3D_glcml_Idm | log.sigma.5.0.mm.3D_glcml_Correlation | log.sigma.5.0.mm.3D_glcml_Autocorrelation |
|----------------------------------------------|-------------------------------|-------------------------------|---------------------------------------|-------------------------------------------|
| 8.259079392                                  | 0.897017554                   | 0.224144292                   | 0.662959866                           | 284.3129988                               |
| 10.08969711                                  | 0.88167977                    | 0.191514484                   | 0.594478521                           | 326.6682392                               |
| 8.723379109                                  | 0.888662006                   | 0.207659744                   | 0.557529009                           | 322.6306142                               |
| 10.94017081                                  | 0.878337126                   | 0.180251034                   | 0.582959932                           | 289.2573316                               |
| 6.578726377                                  | 0.895507833                   | 0.241278288                   | 0.684206845                           | 183.4349994                               |
| 7.298309644                                  | 0.883675508                   | 0.211846812                   | 0.683069897                           | 269.5473694                               |
| 5.410527697                                  | 0.941569192                   | 0.431080528                   | 0.694586823                           | 134.2579173                               |
| 7.788664                                     | 0.917345898                   | 0.295519549                   | 0.634256723                           | 241.5759409                               |
| 6.4763146                                    | 0.914497223                   | 0.34535755                    | 0.647384542                           | 145.6347077                               |
| 4.835772907                                  | 0.900669788                   | 0.273326796                   | 0.671080211                           | 169.8713289                               |
| 3.115270888                                  | 0.911811777                   | 0.396854017                   | 0.628851384                           | 92.00225905                               |
| 4.989571218                                  | 0.925936611                   | 0.380817647                   | 0.675876168                           | 139.2562596                               |
| 9.694756689                                  | 0.888797222                   | 0.210407624                   | 0.604267429                           | 299.4391896                               |
| 10.19135263                                  | 0.880741276                   | 0.176645667                   | 0.606669549                           | 275.6335268                               |
| 7.954828722                                  | 0.905510183                   | 0.275806608                   | 0.605402285                           | 140.0634594                               |
| 7.852462007                                  | 0.91420402                    | 0.362114741                   | 0.628519747                           | 171.823851                                |
| 3.246367687                                  | 0.899402917                   | 0.346010184                   | 0.631275729                           | 88.70668232                               |
| 10.87690649                                  | 0.88249909                    | 0.183227804                   | 0.625258913                           | 275.7810517                               |
| 3.256866134                                  | 0.910600555                   | 0.388969907                   | 0.622040362                           | 85.99420157                               |
| 6.025079529                                  | 0.943232909                   | 0.306771489                   | 0.668960938                           | 715.7788759                               |
| 6.514912553                                  | 0.889015325                   | 0.257108345                   | 0.666024871                           | 185.3399087                               |
| 6.578570113                                  | 0.88873449                    | 0.249667577                   | 0.650043579                           | 249.4048287                               |
| 6.652962897                                  | 0.897827989                   | 0.244028576                   | 0.625358948                           | 196.3515999                               |
| 3.802381044                                  | 0.934544221                   | 0.441256698                   | 0.669558729                           | 120.8945686                               |
| 9.491739824                                  | 0.910610014                   | 0.286554136                   | 0.629801536                           | 302.348368                                |
| 7.123215931                                  | 0.917354709                   | 0.282558348                   | 0.691982032                           | 228.7880568                               |
| 8.008031857                                  | 0.89989259                    | 0.235839472                   | 0.595060662                           | 257.1085358                               |
| 4.327823831                                  | 0.911577225                   | 0.326568363                   | 0.663962393                           | 137.36128                                 |
| 2.304013153                                  | 0.911044937                   | 0.383031716                   | 0.662905689                           | 120.2301914                               |
| 5.021432433                                  | 0.908765385                   | 0.2769415                     | 0.645156938                           | 160.6798826                               |
| 6.356293689                                  | 0.907857585                   | 0.289077351                   | 0.658479576                           | 174.6150458                               |
| 8.573117535                                  | 0.876921843                   | 0.204673318                   | 0.573270782                           | 275.144672                                |
| 6.30078377                                   | 0.922067201                   | 0.29662553                    | 0.705146223                           | 220.9565176                               |
| 6.229292465                                  | 0.923650079                   | 0.33542975                    | 0.666224262                           | 197.7193153                               |
| 6.150863727                                  | 0.917451304                   | 0.31435867                    | 0.669372148                           | 175.4892167                               |
| 8.287727037                                  | 0.89172128                    | 0.246886878                   | 0.608357956                           | 262.8609357                               |
| 9.160880294                                  | 0.892758617                   | 0.211417995                   | 0.578967457                           | 338.9694944                               |
| 8.33861526                                   | 0.927330496                   | 0.383511802                   | 0.670090733                           | 234.570726                                |
| 3.895021528                                  | 0.885202633                   | 0.276792435                   | 0.647567426                           | 150.3901362                               |
| 4.718460603                                  | 0.94665344                    | 0.394237411                   | 0.707893671                           | 322.9236244                               |
| 6.982685508                                  | 0.89853369                    | 0.238186701                   | 0.666681229                           | 201.9566483                               |
| 2.549587922                                  | 0.949972749                   | 0.480627505                   | 0.719189173                           | 169.1470364                               |
| 8.846546659                                  | 0.895787759                   | 0.216879187                   | 0.605210692                           | 298.527191                                |
| 6.446894664                                  | 0.902140241                   | 0.233180246                   | 0.685885606                           | 189.1547859                               |
| 5.125670911                                  | 0.929273575                   | 0.38740392                    | 0.661172693                           | 152.3668569                               |
| 7.489132249                                  | 0.896085741                   | 0.25186997                    | 0.6316896                             | 217.711602                                |
| 4.980741861                                  | 0.926624603                   | 0.338095394                   | 0.661164721                           | 204.4031771                               |
| 4.391935063                                  | 0.883555269                   | 0.289370214                   | 0.573573607                           | 107.9012998                               |
| 5.52684212                                   | 0.902975926                   | 0.257121155                   | 0.726149274                           | 148.9034466                               |
| 6.201141882                                  | 0.884683059                   | 0.227684146                   | 0.634807376                           | 226.4060339                               |
| 7.053809886                                  | 0.902993614                   | 0.258700139                   | 0.656610498                           | 161.6892302                               |
| 6.852929162                                  | 0.9125012                     | 0.258337843                   | 0.666185697                           | 301.5178072                               |
| 3.553107537                                  | 0.947090099                   | 0.507993187                   | 0.687435543                           | 129.4320872                               |
| 4.617018687                                  | 0.923903618                   | 0.346215713                   | 0.635481855                           | 213.4619464                               |
| 10.86538692                                  | 0.879779141                   | 0.179372073                   | 0.628001207                           | 343.0139897                               |
| 6.780951174                                  | 0.887966568                   | 0.230822257                   | 0.668853371                           | 187.8430664                               |
| 5.929652149                                  | 0.92341448                    | 0.328737514                   | 0.674205437                           | 172.5428337                               |
| 7.079362932                                  | 0.892721293                   | 0.242974296                   | 0.597937244                           | 208.6024014                               |
| 6.292574468                                  | 0.894212454                   | 0.252463671                   | 0.611396101                           | 235.4483725                               |
| 4.552880652                                  | 0.945054435                   | 0.463738824                   | 0.695972215                           | 189.7717252                               |
| 6.210242394                                  | 0.9082379                     | 0.270474327                   | 0.623256594                           | 190.5618075                               |
| 7.434475725                                  | 0.914148946                   | 0.239856418                   | 0.68032952                            | 346.6957954                               |
| 7.632838106                                  | 0.926464681                   | 0.287426139                   | 0.668194269                           | 367.2403343                               |
| 6.923229491                                  | 0.915893796                   | 0.267163718                   | 0.703555778                           | 274.0062278                               |
| 5.146031164                                  | 0.893523007                   | 0.271449799                   | 0.590279817                           | 134.0559173                               |
| 6.628059048                                  | 0.917854448                   | 0.244426976                   | 0.663847492                           | 331.8734278                               |
| 8.955547136                                  | 0.871577253                   | 0.199007474                   | 0.559974236                           | 252.7665192                               |
| 6.02549242                                   | 0.922112437                   | 0.289830648                   | 0.686367598                           | 242.666921                                |
| 4.057517129                                  | 0.9327477                     | 0.357940316                   | 0.717058906                           | 181.1570492                               |
| 5.864045315                                  | 0.902155283                   | 0.263628134                   | 0.647745811                           | 245.375207                                |
| 5.989544477                                  | 0.877075032                   | 0.235401186                   | 0.615390493                           | 145.8043975                               |
| 8.520206725                                  | 0.911459183                   | 0.301496927                   | 0.625149715                           | 208.2781857                               |
| 8.465763623                                  | 0.88416924                    | 0.216490839                   | 0.615816771                           | 182.8935447                               |
| 4.80445818                                   | 0.90529778                    | 0.285348479                   | 0.630585434                           | 120.2824937                               |
| 5.61112838                                   | 0.93619947                    | 0.369722736                   | 0.724742207                           | 199.1801222                               |
| 3.457024415                                  | 0.885042823                   | 0.303317221                   | 0.610433595                           | 91.38045263                               |
| 5.642034146                                  | 0.915647438                   | 0.285315943                   | 0.680087886                           | 244.2291975                               |
| 11.9673951                                   | 0.875654452                   | 0.175696098                   | 0.558836539                           | 408.2428775                               |
| 5.39369948                                   | 0.90221362                    | 0.267308078                   | 0.687029006                           | 237.2852676                               |
| 4.31272594                                   | 0.925095808                   | 0.35288519                    | 0.646649578                           | 153.7005489                               |
| 8.146909434                                  | 0.897588534                   | 0.225289281                   | 0.668754843                           | 280.3017425                               |
| 5.779056831                                  | 0.894981096                   | 0.248541427                   | 0.668854925                           | 270.063724                                |
| 7.063722772                                  | 0.901196604                   | 0.287366643                   | 0.578985838                           | 140.9565887                               |
| 4.380473232                                  | 0.919700743                   | 0.322752054                   | 0.639934086                           | 143.4685822                               |
| 5.959393374                                  | 0.919733502                   | 0.333844945                   | 0.696094023                           | 186.3583954                               |
| 9.688550507                                  | 0.904136806                   | 0.228467746                   | 0.583467293                           | 451.3804424                               |
| 6.10926231                                   | 0.904886909                   | 0.278919092                   | 0.651050809                           | 182.760536                                |
| 6.299064691                                  | 0.929825506                   | 0.406544894                   | 0.690011514                           | 162.2407904                               |
| 4.810895188                                  | 0.915018956                   | 0.32214952                    | 0.634555491                           | 161.2342416                               |
| 6.976445173                                  | 0.89414177                    | 0.242703609                   | 0.677988082                           | 194.5134073                               |
| 7.991484236                                  | 0.904513991                   | 0.252486951                   | 0.657897564                           | 411.488785                                |
| 5.102826025                                  | 0.924350955                   | 0.352961149                   | 0.670396735                           | 214.5121682                               |
| 4.078614454                                  | 0.928174158                   | 0.327119485                   | 0.696738509                           | 225.9711649                               |
| 5.477160438                                  | 0.917681192                   | 0.294608672                   | 0.68955626                            | 187.8007034                               |
| 2.912104163                                  | 0.920761216                   | 0.35925681                    | 0.699733585                           | 148.9285908                               |
| 10.03329968                                  | 0.896490113                   | 0.20703031                    | 0.631366586                           | 282.5732781                               |
| 6.263083684                                  | 0.903585989                   | 0.264431642                   | 0.667854125                           | 169.369265                                |
| 6.555367368                                  | 0.883965854                   | 0.243900416                   | 0.608082759                           | 223.4756275                               |
| 5.220254546                                  | 0.878281382                   | 0.266702275                   | 0.531574787                           | 142.9918224                               |
| 6.755459721                                  | 0.919690643                   | 0.288561911                   | 0.649174625                           | 320.5330327                               |

| log.sigma.5.0.mm.3D_glc_m_SumEntropy | log.sigma.5.0.mm.3D_glc_m_AverageIntensity | log.sigma.5.0.mm.3D_glc_m_Energy | log.sigma.5.0.mm.3D_glc_m_SumSquares | log.sigma.5.0.mm.3D_glc_m_ClusterProminence |
|--------------------------------------|--------------------------------------------|----------------------------------|--------------------------------------|---------------------------------------------|
| 5.432602651                          | 16.29587078                                | 0.003603181                      | 36.74803728                          | 35781.01962                                 |
| 5.33236353                           | 17.56559379                                | 0.005177297                      | 39.57867977                          | 40357.00936                                 |
| 5.295089623                          | 17.65494693                                | 0.004157349                      | 34.06147197                          | 26303.5622                                  |
| 5.362736353                          | 16.45552368                                | 0.004930166                      | 41.70651309                          | 44026.8517                                  |
| 5.309905476                          | 12.77652097                                | 0.004120984                      | 30.52604625                          | 24973.25956                                 |
| 5.232040686                          | 15.73433273                                | 0.006044693                      | 37.95243652                          | 34969.05997                                 |
| 4.834084945                          | 11.10470352                                | 0.016453663                      | 17.53162309                          | 12853.81079                                 |
| 5.198474284                          | 15.12879172                                | 0.005314445                      | 26.4659987                           | 23557.24451                                 |
| 4.98658342                           | 11.50111176                                | 0.008415548                      | 21.72301535                          | 17355.94053                                 |
| 5.057261647                          | 12.44328106                                | 0.005944565                      | 22.43061222                          | 13209.67235                                 |
| 4.508749638                          | 9.23945539                                 | 0.013663612                      | 10.47204536                          | 3424.141797                                 |
| 4.878469571                          | 11.31284884                                | 0.01067625                       | 16.98877647                          | 11922.23666                                 |
| 5.355696873                          | 16.82315998                                | 0.004118218                      | 37.23167153                          | 34205.04751                                 |
| 5.436270428                          | 16.03314736                                | 0.003761397                      | 43.93388847                          | 46447.97487                                 |
| 5.121610555                          | 11.23168396                                | 0.005513499                      | 25.74474011                          | 20721.4018                                  |
| 5.087073475                          | 12.55887999                                | 0.00952203                       | 24.06852122                          | 16496.54949                                 |
| 4.604401081                          | 9.021137744                                | 0.010080935                      | 11.59323958                          | 3982.112505                                 |
| 5.451270486                          | 15.8695813                                 | 0.004206509                      | 45.32238041                          | 52061.20654                                 |
| 4.505197228                          | 8.913243726                                | 0.01484805                       | 10.51050495                          | 4032.056377                                 |
| 5.102625317                          | 26.62763378                                | 0.006241189                      | 22.43621339                          | 20130.25865                                 |
| 5.230596554                          | 12.93261722                                | 0.004412735                      | 27.13763267                          | 19173.56232                                 |
| 5.127109754                          | 15.23024579                                | 0.006232141                      | 27.43202316                          | 21480.79576                                 |
| 5.142996766                          | 13.42951096                                | 0.005538107                      | 26.34851211                          | 20324.18368                                 |
| 4.594532505                          | 10.63176809                                | 0.018452154                      | 11.76000544                          | 6101.388772                                 |
| 5.305114208                          | 16.96570717                                | 0.005826745                      | 32.08565278                          | 29872.66558                                 |
| 5.380813761                          | 14.51582925                                | 0.004871361                      | 30.56714366                          | 28971.78657                                 |
| 5.255811027                          | 15.6535179                                 | 0.004505917                      | 29.89586928                          | 23288.14918                                 |
| 4.908479442                          | 11.23750054                                | 0.007123218                      | 16.68098308                          | 8563.871014                                 |
| 4.282990898                          | 10.67549693                                | 0.01866574                       | 9.440132072                          | 2613.955954                                 |
| 5.020819721                          | 12.16822067                                | 0.006150938                      | 20.32322358                          | 13496.80809                                 |
| 5.158651844                          | 12.61675818                                | 0.00524419                       | 25.24529949                          | 19395.92073                                 |
| 5.237202746                          | 16.12830441                                | 0.004185792                      | 32.5654143                           | 22828.17639                                 |
| 5.244547493                          | 14.27562925                                | 0.005527947                      | 27.65602442                          | 27245.81646                                 |
| 5.057805273                          | 13.6186337                                 | 0.006654761                      | 22.61144667                          | 13495.34922                                 |
| 5.085363231                          | 12.72225706                                | 0.006345891                      | 22.84957438                          | 16088.85358                                 |
| 5.281947005                          | 15.70474778                                | 0.004114819                      | 30.42738023                          | 24183.27258                                 |
| 5.323257142                          | 18.12500783                                | 0.003986576                      | 34.88495441                          | 33357.72689                                 |
| 5.124203574                          | 14.85552938                                | 0.014382988                      | 26.74060095                          | 23728.66522                                 |
| 4.895383173                          | 11.7666886                                 | 0.007648892                      | 18.49364661                          | 9528.650274                                 |
| 4.907079435                          | 17.73046661                                | 0.010459118                      | 17.06115645                          | 14903.41017                                 |
| 5.314503946                          | 13.54385314                                | 0.00407992                       | 31.52883755                          | 25287.7965                                  |
| 4.447472003                          | 12.7496348                                 | 0.022985063                      | 9.388018302                          | 4802.894165                                 |
| 5.45975277                           | 16.82892998                                | 0.003623513                      | 38.75920585                          | 40270.67023                                 |
| 5.328242356                          | 13.03768821                                | 0.004080409                      | 32.05641309                          | 28976.9814                                  |
| 4.773674055                          | 11.91374306                                | 0.013115717                      | 16.23592386                          | 11682.71878                                 |
| 5.267049816                          | 14.19504227                                | 0.004175079                      | 29.411770574                         | 20969.81111                                 |
| 4.951870715                          | 13.92745721                                | 0.007145162                      | 18.11425461                          | 10180.48235                                 |
| 4.704801526                          | 9.969360887                                | 0.008838259                      | 14.8294988                           | 6151.702618                                 |
| 5.160009026                          | 11.33651046                                | 0.006297534                      | 29.99378835                          | 30803.25571                                 |
| 5.133819937                          | 14.4739879                                 | 0.005694936                      | 27.13953319                          | 18690.72652                                 |
| 5.18540568                           | 11.99489707                                | 0.005281504                      | 29.19074965                          | 26038.44783                                 |
| 5.269838608                          | 16.95580973                                | 0.004450124                      | 28.04988087                          | 24672.45274                                 |
| 4.402025227                          | 11.06472955                                | 0.030694589                      | 10.41277168                          | 7220.838223                                 |
| 4.832369437                          | 14.30597537                                | 0.009029593                      | 16.62224617                          | 9306.320451                                 |
| 5.529987407                          | 17.94874875                                | 0.003440467                      | 47.14972066                          | 58604.59159                                 |
| 5.288578157                          | 12.94267084                                | 0.004109018                      | 31.41955332                          | 25250.36449                                 |
| 5.096299027                          | 16.61005053                                | 0.006625884                      | 22.83151168                          | 17247.14938                                 |
| 5.14084209                           | 13.92851592                                | 0.004310011                      | 25.8151245                           | 14727.22406                                 |
| 5.08427966                           | 14.89431362                                | 0.005356579                      | 23.94685924                          | 15556.11444                                 |
| 4.709591245                          | 13.44401594                                | 0.02366897                       | 14.57909088                          | 9454.723186                                 |
| 5.079914357                          | 13.32777606                                | 0.005559863                      | 23.10323363                          | 16808.3798                                  |
| 5.405454299                          | 18.17363284                                | 0.003931031                      | 33.1382373                           | 36725.73555                                 |
| 5.279864243                          | 18.80665184                                | 0.004961497                      | 28.2058972                           | 27390.68462                                 |
| 5.357511586                          | 15.98416926                                | 0.004487417                      | 31.19433465                          | 32143.6519                                  |
| 4.891292324                          | 11.10216667                                | 0.006548616                      | 18.22135622                          | 8276.34282                                  |
| 5.292254621                          | 17.87255765                                | 0.004260307                      | 28.14889598                          | 28935.80261                                 |
| 5.161304089                          | 15.38083735                                | 0.005264657                      | 32.23602313                          | 24821.0989                                  |
| 5.19546432                           | 15.11299134                                | 0.005411829                      | 25.4113028                           | 22616.3544                                  |
| 4.957708493                          | 13.02317588                                | 0.007930191                      | 17.71926935                          | 11217.82653                                 |
| 5.145076649                          | 15.20418309                                | 0.00502341                       | 23.97429343                          | 15450.62454                                 |
| 5.068481573                          | 11.38628231                                | 0.005938602                      | 26.08664692                          | 14897.57251                                 |
| 5.206600105                          | 13.94532418                                | 0.006140207                      | 27.72976657                          | 23671.30519                                 |
| 5.319203473                          | 12.77288237                                | 0.003755707                      | 33.80727337                          | 26866.78503                                 |
| 4.912932681                          | 10.42289972                                | 0.006779432                      | 18.40136775                          | 10397.67198                                 |
| 5.108745554                          | 13.61772033                                | 0.009065157                      | 22.92302801                          | 22439.32017                                 |
| 4.690135791                          | 9.103434407                                | 0.008537035                      | 13.89944991                          | 4462.357804                                 |
| 5.160708128                          | 15.16306749                                | 0.005135956                      | 24.10173581                          | 16896.70312                                 |
| 5.310231284                          | 19.89579923                                | 0.005142041                      | 42.15371061                          | 50707.50763                                 |
| 5.186727017                          | 14.86579841                                | 0.005110979                      | 25.01110373                          | 17738.57253                                 |
| 4.791214247                          | 12.01990319                                | 0.008725737                      | 14.70982608                          | 7153.273099                                 |
| 5.437343631                          | 16.16011951                                | 0.003638551                      | 36.93362469                          | 36912.49454                                 |
| 5.18632693                           | 15.92393515                                | 0.005226562                      | 26.99447029                          | 19987.56169                                 |
| 5.052954645                          | 11.32430455                                | 0.006114714                      | 22.41066485                          | 13327.30235                                 |
| 4.853596416                          | 11.55592834                                | 0.007788277                      | 15.84340755                          | 8253.881575                                 |
| 5.110625992                          | 13.08170106                                | 0.00793635                       | 23.9458497                           | 20663.84593                                 |
| 5.171796448                          | 20.96110524                                | 0.006445521                      | 30.98881174                          | 33841.44422                                 |
| 5.123538167                          | 12.96034332                                | 0.005283288                      | 23.74085692                          | 14781.91197                                 |
| 4.94712884                           | 12.21162732                                | 0.015483204                      | 20.72035403                          | 17262.48443                                 |
| 4.879319254                          | 12.28073227                                | 0.007993129                      | 16.77110168                          | 8955.78575                                  |
| 5.319773107                          | 13.21829909                                | 0.004193379                      | 31.39474219                          | 27444.2785                                  |
| 5.279570064                          | 19.92302497                                | 0.005245392                      | 31.59065011                          | 32753.52173                                 |
| 4.939614898                          | 14.26961443                                | 0.009401079                      | 18.45977723                          | 12751.30182                                 |
| 4.967856757                          | 14.65273594                                | 0.006872751                      | 17.81826158                          | 11424.34195                                 |
| 5.145401822                          | 13.14174206                                | 0.005496325                      | 23.77436461                          | 18072.55954                                 |
| 4.758045414                          | 11.81636286                                | 0.008908008                      | 13.26906619                          | 5250.483828                                 |
| 5.507210315                          | 16.24969512                                | 0.002993502                      | 40.49969386                          | 45388.07549                                 |
| 5.224633496                          | 12.33071813                                | 0.004443887                      | 26.89878394                          | 19155.18228                                 |
| 5.004244025                          | 14.43423397                                | 0.006878759                      | 24.87903264                          | 14773.01118                                 |
| 4.677950808                          | 11.58840068                                | 0.009162931                      | 16.41797008                          | 6777.796048                                 |
| 5.188523804                          | 17.60219418                                | 0.005012694                      | 24.6448503                           | 18141.494                                   |

| log.sigma.5.0.mm.3D_glc_m_SumAverage | log.sigma.5.0.mm.3D_glc_m_lmc2 | log.sigma.5.0.mm.3D_glc_m_lmc1 | log.sigma.5.0.mm.3D_glc_m_DifferenceAverage | log.sigma.5.0.mm.3D_glc_m_Id |
|--------------------------------------|--------------------------------|--------------------------------|---------------------------------------------|------------------------------|
| 32.29432704                          | 0.866447379                    | -0.158950985                   | 3.907251087                                 | 0.317882254                  |
| 34.84257794                          | 0.959906854                    | -0.281053967                   | 4.585541177                                 | 0.286227983                  |
| 34.87808045                          | 0.883235749                    | -0.176816696                   | 4.39722511                                  | 0.299343267                  |
| 32.59315284                          | 0.962480462                    | -0.283719574                   | 4.741299565                                 | 0.275937275                  |
| 25.51369898                          | 0.863037493                    | -0.16150784                    | 3.475431838                                 | 0.334986314                  |
| 31.26359432                          | 0.975503625                    | -0.334345757                   | 3.923341677                                 | 0.308089153                  |
| 22.1327617                           | 0.855672907                    | -0.180115653                   | 2.192847638                                 | 0.494312434                  |
| 30.02430421                          | 0.790641716                    | -0.122639547                   | 3.268486116                                 | 0.37761199                   |
| 22.96009227                          | 0.806615936                    | -0.145783831                   | 2.826479086                                 | 0.420275582                  |
| 24.8812364                           | 0.88002256                     | -0.185739657                   | 3.042032108                                 | 0.3637751                    |
| 18.47891078                          | 0.791117533                    | -0.154279446                   | 2.076993765                                 | 0.466531677                  |
| 22.61367625                          | 0.828345887                    | -0.156034455                   | 2.397228767                                 | 0.450753603                  |
| 33.31567939                          | 0.895986069                    | -0.183566184                   | 4.283458077                                 | 0.303158591                  |
| 31.61501304                          | 0.921317439                    | -0.207283088                   | 4.758385201                                 | 0.273008154                  |
| 22.36352508                          | 0.824944728                    | -0.145800069                   | 3.36275382                                  | 0.361721424                  |
| 25.06328586                          | 0.866839648                    | -0.181121796                   | 2.975264452                                 | 0.431662485                  |
| 18.04227549                          | 0.808105968                    | -0.149709647                   | 2.272986399                                 | 0.425839198                  |
| 31.49054479                          | 0.956164398                    | -0.263913988                   | 4.690016264                                 | 0.278095804                  |
| 17.82648745                          | 0.808210363                    | -0.158890159                   | 2.109289598                                 | 0.458903625                  |
| 52.95253589                          | 0.789480524                    | -0.129677368                   | 2.891160733                                 | 0.390083437                  |
| 25.86523445                          | 0.826669144                    | -0.144850198                   | 3.348825483                                 | 0.34774626                   |
| 30.44115089                          | 0.914515726                    | -0.214417628                   | 3.482881263                                 | 0.341354568                  |
| 26.82846464                          | 0.911565942                    | -0.208591496                   | 3.509934017                                 | 0.335534463                  |
| 21.26214574                          | 0.827832804                    | -0.168116611                   | 1.949962897                                 | 0.502548377                  |
| 33.62105724                          | 0.89572035                     | -0.198043373                   | 3.59674077                                  | 0.368013013                  |
| 28.8485952                           | 0.861728236                    | -0.163988792                   | 3.253831359                                 | 0.367840458                  |
| 30.99424557                          | 0.82418166                     | -0.142437581                   | 3.799494235                                 | 0.327690218                  |
| 22.47500107                          | 0.804432726                    | -0.140871109                   | 2.579744073                                 | 0.408411371                  |
| 21.35099385                          | 0.944984956                    | -0.315715939                   | 1.967282377                                 | 0.458068476                  |
| 24.3095472                           | 0.830991954                    | -0.150595615                   | 2.975590532                                 | 0.366496034                  |
| 25.16636996                          | 0.810199473                    | -0.138179726                   | 3.146484208                                 | 0.37357779                   |
| 32.06781444                          | 0.867533937                    | -0.163729057                   | 4.208586711                                 | 0.30036352                   |
| 28.41543744                          | 0.854794907                    | -0.162757218                   | 3.043888735                                 | 0.380223175                  |
| 27.07256496                          | 0.845296608                    | -0.162465896                   | 2.822037218                                 | 0.412756363                  |
| 25.35071552                          | 0.800391739                    | -0.132715307                   | 2.879807797                                 | 0.395424667                  |
| 31.29174315                          | 0.820350603                    | -0.135858885                   | 3.785908129                                 | 0.336274974                  |
| 35.75620761                          | 0.849689613                    | 4.2591693                      | 4.2591693                                   | 0.304673458                  |
| 29.47927708                          | 0.894450571                    | -0.197812121                   | 2.886426413                                 | 0.451242177                  |
| 23.5333772                           | 0.882102332                    | -0.199084765                   | 2.910226207                                 | 0.367959513                  |
| 35.26581353                          | 0.834546564                    | -0.161164077                   | 2.254452748                                 | 0.46275096                   |
| 26.94534776                          | 0.862324115                    | -0.161785707                   | 3.598295198                                 | 0.33140598                   |
| 25.49080042                          | 0.842190508                    | -0.18769604                    | 1.607618101                                 | 0.535610938                  |
| 33.22693816                          | 0.855085575                    | -0.164143582                   | 4.356451897                                 | 0.307737043                  |
| 25.9138369                           | 0.86930273                     | -0.165443374                   | 3.55492489                                  | 0.327847446                  |
| 23.81083848                          | 0.855216334                    | -0.177652664                   | 2.362790366                                 | 0.45570891                   |
| 28.26012359                          | 0.811742162                    | -0.132266152                   | 3.597313372                                 | 0.341186964                  |
| 27.76729598                          | 0.798044095                    | -0.13524765                    | 2.599669452                                 | 0.416996987                  |
| 19.93872177                          | 0.843521945                    | -0.165033682                   | 2.828474749                                 | 0.376721788                  |
| 22.59737169                          | 0.947574722                    | -0.263918465                   | 3.187816501                                 | 0.35053448                   |
| 28.93051253                          | 0.918526526                    | -0.219511027                   | 3.607031932                                 | 0.323509187                  |
| 23.89943928                          | 0.865491285                    | -0.166916105                   | 3.432482116                                 | 0.348653515                  |
| 33.65945262                          | 0.819279021                    | -0.136290681                   | 3.350668374                                 | 0.348645525                  |
| 22.12130541                          | 0.845636096                    | -0.18875249                    | 1.676722874                                 | 0.558222433                  |
| 28.51754584                          | 0.832088766                    | -0.166716173                   | 2.543303012                                 | 0.422841097                  |
| 35.43012883                          | 0.930225006                    | -0.214741609                   | 4.808645666                                 | 0.274887086                  |
| 25.84504008                          | 0.865970499                    | -0.165482565                   | 3.63162325                                  | 0.325581099                  |
| 25.10893211                          | 0.8332575                      | -0.156631751                   | 2.827328822                                 | 0.407136092                  |
| 27.80904862                          | 0.785407878                    | -0.122541638                   | 3.590711228                                 | 0.33504955                   |
| 29.7326785                           | 0.859562093                    | -0.165307563                   | 3.405389939                                 | 0.344018717                  |
| 26.82513865                          | 0.863882181                    | -0.19072236                    | 1.989002148                                 | 0.522860007                  |
| 26.57335269                          | 0.827408002                    | -0.144682537                   | 3.219775741                                 | 0.359160819                  |
| 36.00058744                          | 0.847782511                    | -0.149675042                   | 3.661915034                                 | 0.33168661                   |
| 37.32034721                          | 0.798083388                    | -0.131077491                   | 3.276947858                                 | 0.371377937                  |
| 31.77916693                          | 0.859217534                    | -0.159681402                   | 3.306133506                                 | 0.356577148                  |
| 22.20433333                          | 0.838158714                    | -0.157871566                   | 3.05315494                                  | 0.361962442                  |
| 35.39327002                          | 0.815263971                    | -0.133050127                   | 3.478044017                                 | 0.337306774                  |
| 30.66544202                          | 0.925299469                    | -0.22338497                    | 4.274810671                                 | 0.29456657                   |
| 30.04469255                          | 0.814806671                    | -0.138693927                   | 3.033224152                                 | 0.375913506                  |
| 25.98053136                          | 0.831249515                    | -0.157538257                   | 2.35489496                                  | 0.433441177                  |
| 30.34098057                          | 0.813841128                    | -0.136484092                   | 3.224953088                                 | 0.354591498                  |
| 22.77256462                          | 0.910585589                    | -0.213178077                   | 3.60473533                                  | 0.329142805                  |
| 27.68931837                          | 0.813307                       | -0.134903001                   | 3.343816823                                 | 0.381704107                  |
| 25.48464548                          | 0.847944578                    | -0.148668929                   | 4.062846144                                 | 0.309860687                  |
| 20.843386                            | 0.844760364                    | -0.161370355                   | 2.887025383                                 | 0.373466586                  |
| 27.06969419                          | 0.868796233                    | -0.181582313                   | 2.532160215                                 | 0.442540273                  |
| 18.20686881                          | 0.821728742                    | -0.15778749                    | 2.639379734                                 | 0.39061106                   |
| 30.21087302                          | 0.835005251                    | -0.148906973                   | 3.020905172                                 | 0.372191229                  |
| 39.22952066                          | 0.962075814                    | -0.282586478                   | 5.012930683                                 | 0.269114577                  |
| 29.6866367                           | 0.853358547                    | -0.162338563                   | 3.107079253                                 | 0.358094353                  |
| 24.02278721                          | 0.815397512                    | -0.149027588                   | 2.404562077                                 | 0.42928775                   |
| 32.02644962                          | 0.871460556                    | -0.162629054                   | 3.881944911                                 | 0.318977544                  |
| 31.7735835                           | 0.886999741                    | -0.186151699                   | 3.367732147                                 | 0.342027073                  |
| 22.63022589                          | 0.798190089                    | -0.137968782                   | 3.301276899                                 | 0.371828298                  |
| 23.0994294                           | 0.797065288                    | -0.139636126                   | 2.587053816                                 | 0.40551417                   |
| 26.08605412                          | 0.856886326                    | -0.169243027                   | 2.799716303                                 | 0.410751251                  |
| 41.60368482                          | 0.928188427                    | -0.227310306                   | 4.060284302                                 | 0.318342681                  |
| 25.88449387                          | 0.843995652                    | -0.156700589                   | 3.139422997                                 | 0.365798052                  |
| 24.3553947                           | 0.867038199                    | -0.180623456                   | 2.447001166                                 | 0.471295059                  |
| 24.548451                            | 0.806897185                    | -0.140804732                   | 2.666811607                                 | 0.403373491                  |
| 26.35765896                          | 0.864975692                    | -0.16274866                    | 3.534505189                                 | 0.335814366                  |
| 39.53628249                          | 0.899936529                    | -0.195600699                   | 3.606217881                                 | 0.341413369                  |
| 28.45996124                          | 0.839287307                    | -0.165808538                   | 2.532806404                                 | 0.428075267                  |
| 29.24203071                          | 0.816687399                    | -0.144810553                   | 2.519111151                                 | 0.409538694                  |
| 26.20802985                          | 0.824397668                    | -0.1448458                     | 2.941433236                                 | 0.380505153                  |
| 23.63272572                          | 0.812934078                    | -0.158655225                   | 2.180098323                                 | 0.436731135                  |
| 32.09677353                          | 0.82999002                     | -0.134971903                   | 4.301565073                                 | 0.300481803                  |
| 24.62450978                          | 0.819035864                    | -0.141960647                   | 3.292397962                                 | 0.354150924                  |
| 28.86846793                          | 0.934308315                    | -0.245855212                   | 3.520133595                                 | 0.335906461                  |
| 23.17680135                          | 0.903547125                    | -0.218493057                   | 3.133331577                                 | 0.357042292                  |
| 34.91596498                          | 0.779534899                    | -0.123083271                   | 3.150452994                                 | 0.374075594                  |

| log.sigma.5.0.mm.3D_glcm_ClusterTendency | log.sigma.5.0.mm.3D_firstorder_InterquartileRange | log.sigma.5.0.mm.3D_firstorder_Skewness | log.sigma.5.0.mm.3D_firstorder_Uniformity |
|------------------------------------------|---------------------------------------------------|-----------------------------------------|-------------------------------------------|
| 118.4355011                              | 216.4847264                                       | 0.204572135                             | 0.045254602                               |
| 124.2962344                              | 199.1555977                                       | -0.363500776                            | 0.047396789                               |
| 103.4165293                              | 236.7304878                                       | -0.129744336                            | 0.046140079                               |
| 128.9397141                              | 212.0634613                                       | -0.189767594                            | 0.047201111                               |
| 101.7308356                              | 202.4375916                                       | -0.090175185                            | 0.049803583                               |
| 123.9487677                              | 227.7712307                                       | -0.295534852                            | 0.045522847                               |
| 57.59536187                              | 105.5055456                                       | 0.726891255                             | 0.083364577                               |
| 83.71751673                              | 161.9889612                                       | 0.534962968                             | 0.057550681                               |
| 70.33276254                              | 132.7480354                                       | 0.740880224                             | 0.068301696                               |
| 74.90268407                              | 189.2193413                                       | 0.057958336                             | 0.055080004                               |
| 34.18923094                              | 106.3708019                                       | 0.528834626                             | 0.093919549                               |
| 56.55070768                              | 115.8570004                                       | 0.508221647                             | 0.075893835                               |
| 116.7605789                              | 238.8722343                                       | -0.36617654                             | 0.046902866                               |
| 136.8326926                              | 247.9908929                                       | -0.396467977                            | 0.043439682                               |
| 79.91919617                              | 171.2361979                                       | 0.562169303                             | 0.057378685                               |
| 76.86081161                              | 160.4863682                                       | 0.387358093                             | 0.063243111                               |
| 37.81960129                              | 125.863142                                        | 0.181002451                             | 0.077804099                               |
| 144.9447281                              | 240.490695                                        | -0.255461725                            | 0.042963636                               |
| 34.10061523                              | 91.02700281                                       | 0.343672861                             | 0.092831432                               |
| 73.88777562                              | 151.8408241                                       | 0.460238653                             | 0.060727469                               |
| 90.39643348                              | 203.3690262                                       | -0.189880641                            | 0.052120339                               |
| 89.94539009                              | 167.4234695                                       | -0.625687012                            | 0.061532583                               |
| 84.95855387                              | 176.557023                                        | -0.011897324                            | 0.054842564                               |
| 39.22699988                              | 82.19750023                                       | 0.478720871                             | 0.102021276                               |
| 102.3898637                              | 205.9682045                                       | 0.157366746                             | 0.04989892                                |
| 101.0496909                              | 194.5390224                                       | 0.451882735                             | 0.05191167                                |
| 91.37978321                              | 205.7594776                                       | 0.243931498                             | 0.050803582                               |
| 55.50697883                              | 148.5138168                                       | 0.232939817                             | 0.066029631                               |
| 31.40042874                              | 108.3445376                                       | 0.023487165                             | 0.090542316                               |
| 66.01023827                              | 156.7001581                                       | 0.177691111                             | 0.061630338                               |
| 82.00301624                              | 186.3470421                                       | 0.449229165                             | 0.055434079                               |
| 99.18795649                              | 219.4408951                                       | -0.385538199                            | 0.050223531                               |
| 92.37712895                              | 172.1802845                                       | 0.502270346                             | 0.055619678                               |
| 72.47549304                              | 165.9044018                                       | 0.408967455                             | 0.062224108                               |
| 74.00688878                              | 165.9352074                                       | 0.537444033                             | 0.061356159                               |
| 95.82110176                              | 200.2931671                                       | -0.273716175                            | 0.050767331                               |
| 107.3292409                              | 195.4429476                                       | -0.473987735                            | 0.049589177                               |
| 86.47989555                              | 138.1125488                                       | 0.388050825                             | 0.071023554                               |
| 60.77037981                              | 151.6689711                                       | -0.501965916                            | 0.069387755                               |
| 57.9915118                               | 120.7639751                                       | 0.541618572                             | 0.075512599                               |
| 102.1208906                              | 221.7681098                                       | 0.125603653                             | 0.048631098                               |
| 32.03435032                              | 75.11422634                                       | 0.635604496                             | 0.115255376                               |
| 120.7880667                              | 228.7605877                                       | 0.129716578                             | 0.044370146                               |
| 104.6256083                              | 200.9077015                                       | 0.233087891                             | 0.049104344                               |
| 53.41307788                              | 100.8527699                                       | 0.367743513                             | 0.084112582                               |
| 93.22637631                              | 198.8041077                                       | 0.156867023                             | 0.051194655                               |
| 58.54777652                              | 139.9998627                                       | 0.317626115                             | 0.06739711                                |
| 46.64631214                              | 127.8188829                                       | -0.233195398                            | 0.075397895                               |
| 100.8858384                              | 158.8850746                                       | 0.393243557                             | 0.056952793                               |
| 88.20649813                              | 186.2352715                                       | -0.263826041                            | 0.055172684                               |
| 94.56118546                              | 209.6551676                                       | 0.475622344                             | 0.051916572                               |
| 91.57345631                              | 187.7901459                                       | 0.236100851                             | 0.052337187                               |
| 34.83170791                              | 74.96979618                                       | 0.699926576                             | 0.118383014                               |
| 52.35306313                              | 131.8540459                                       | 0.467582221                             | 0.07264024                                |
| 151.4336501                              | 261.0159187                                       | -0.368604019                            | 0.040718444                               |
| 103.7219602                              | 214.8066788                                       | 0.118361624                             | 0.047782463                               |
| 74.14224347                              | 157.6252499                                       | 0.507788715                             | 0.061547962                               |
| 81.47609759                              | 217.5213642                                       | 0.0751303                               | 0.051981643                               |
| 75.97584356                              | 180.3063116                                       | -0.278186329                            | 0.057229086                               |
| 48.20942719                              | 104.6441574                                       | 0.270561631                             | 0.092892516                               |
| 73.08794012                              | 167.8670349                                       | 0.37174359                              | 0.059170294                               |
| 112.0994089                              | 215.2093964                                       | 0.134303011                             | 0.046468161                               |
| 95.07693864                              | 194.024292                                        | 0.321005795                             | 0.052198893                               |
| 104.312531                               | 172.1362381                                       | -0.003519842                            | 0.05226695                                |
| 57.98553307                              | 171.015049                                        | 0.057539511                             | 0.060792575                               |
| 93.97466291                              | 192.3163834                                       | 0.155040383                             | 0.05052045                                |
| 98.57456019                              | 186.3505096                                       | -0.649190678                            | 0.056346915                               |
| 83.54487645                              | 168.4634743                                       | 0.535633584                             | 0.058086937                               |
| 59.42011438                              | 142.8870831                                       | 0.378872056                             | 0.069013865                               |
| 77.5412216                               | 177.5824337                                       | -0.069000534                            | 0.056314082                               |
| 84.35764724                              | 225.3272305                                       | -0.060051                               | 0.053423888                               |
| 86.55212741                              | 147.8131065                                       | 0.329863003                             | 0.060853246                               |
| 107.7438344                              | 249.014698                                        | 0.090214585                             | 0.046766822                               |
| 59.99316799                              | 160.13051                                         | 0.322391673                             | 0.062255956                               |
| 76.30126536                              | 118.2615256                                       | 0.689472926                             | 0.072564179                               |
| 44.73778334                              | 147.1485462                                       | -0.022795915                            | 0.071646233                               |
| 79.30338964                              | 183.0941162                                       | 0.021568577                             | 0.055236603                               |
| 131.7622723                              | 204.1772308                                       | -0.759440991                            | 0.053091662                               |
| 83.2558497                               | 178.1452007                                       | -0.087957981                            | 0.055334037                               |
| 47.95137013                              | 130.7822533                                       | 0.11652393                              | 0.073364815                               |
| 119.3310928                              | 215.378648                                        | 0.2039465                               | 0.045408926                               |
| 88.37757472                              | 179.499301                                        | -0.443070423                            | 0.056144434                               |
| 70.28354793                              | 179.5335674                                       | 0.226292371                             | 0.058190418                               |
| 51.58177715                              | 134.4963083                                       | 0.264281589                             | 0.069780538                               |
| 79.16830669                              | 139.4776974                                       | 0.476693333                             | 0.065466866                               |
| 101.0929903                              | 162.4469051                                       | -0.767971757                            | 0.066197098                               |
| 77.32820869                              | 186.5955896                                       | 0.030686758                             | 0.05717579                                |
| 68.24030561                              | 112.1005964                                       | 0.555613036                             | 0.080019186                               |
| 54.44933367                              | 138.3975029                                       | 0.259122109                             | 0.06906509                                |
| 103.1163189                              | 199.8701859                                       | 0.047683849                             | 0.049488706                               |
| 104.483839                               | 204.2665539                                       | -0.137759816                            | 0.051601446                               |
| 59.93818659                              | 121.2955103                                       | 0.1779608                               | 0.072721612                               |
| 59.38903315                              | 146.8930054                                       | 0.265180183                             | 0.066777182                               |
| 78.7561679                               | 168.5030785                                       | 0.42634568                              | 0.059223998                               |
| 45.12762861                              | 135.3955135                                       | 0.175224213                             | 0.072893823                               |
| 129.4323893                              | 245.0154076                                       | 0.123524726                             | 0.041783028                               |
| 88.74760307                              | 207.3787384                                       | 0.115861654                             | 0.051431531                               |
| 79.85104222                              | 193.0193367                                       | -0.445646773                            | 0.060743705                               |
| 50.11166614                              | 137.692276                                        | -0.653860661                            | 0.076603921                               |
| 80.16363441                              | 177.1414108                                       | 0.175627459                             | 0.055206058                               |

| log.sigma.5.0.mm.3D_firstorder_MeanAbsoluteDeviation | log.sigma.5.0.mm.3D_firstorder_Energy | log.sigma.5.0.mm.3D_firstorder_RobustMeanAbsoluteDeviation | log.sigma.5.0.mm.3D_firstorder_Median |
|------------------------------------------------------|---------------------------------------|------------------------------------------------------------|---------------------------------------|
| 125.7919834                                          | 43435698.94                           | 91.25007322                                                | -88.62161255                          |
| 127.4473055                                          | 9657861.891                           | 89.74578661                                                | -35.70673752                          |
| 124.9547634                                          | 20569287.35                           | 92.8590073                                                 | -10.9843812                           |
| 130.3995061                                          | 9451789.791                           | 91.02425823                                                | -44.60678864                          |
| 115.2510888                                          | 27689516.05                           | 84.60434793                                                | 2.857310772                           |
| 128.6442375                                          | 5845852.628                           | 94.79589383                                                | 32.45644379                           |
| 76.50453825                                          | 115109920.2                           | 48.11483643                                                | -16.47818565                          |
| 101.0348331                                          | 109765618.9                           | 67.94107161                                                | -42.05788231                          |
| 89.8584095                                           | 60361320.57                           | 59.06276291                                                | -34.73728371                          |
| 104.1509866                                          | 12412131.61                           | 77.94702347                                                | 35.89784622                           |
| 64.59604741                                          | 10849195.13                           | 44.56908437                                                | 5.450558662                           |
| 78.86442683                                          | 37399683                              | 50.2716886                                                 | -9.313735962                          |
| 130.4650494                                          | 22678768.9                            | 96.10173799                                                | -31.54124832                          |
| 138.5807688                                          | 26329250.07                           | 101.3153086                                                | -85.56402206                          |
| 101.0145125                                          | 33775645.04                           | 71.04515515                                                | -88.03726959                          |
| 96.08730879                                          | 87177098.43                           | 66.49857431                                                | -5.103800297                          |
| 72.51160889                                          | 7098719.555                           | 51.76072326                                                | -6.851403713                          |
| 137.7333156                                          | 17021561.85                           | 97.99147471                                                | -95.19457245                          |
| 63.62179337                                          | 8920585.816                           | 40.91412307                                                | -36.5993576                           |
| 95.28267824                                          | 143812914.2                           | 63.72997491                                                | 12.75114918                           |
| 112.1864742                                          | 37781904.57                           | 83.26431368                                                | 11.592731                             |
| 103.3223133                                          | 8372788.238                           | 71.26772998                                                | 16.12412119                           |
| 105.2477417                                          | 10336745.09                           | 74.29090527                                                | -44.0586834                           |
| 61.61229711                                          | 27218896.53                           | 37.28476907                                                | -16.99254227                          |
| 118.54528                                            | 30400855.95                           | 85.29322245                                                | -64.91657639                          |
| 114.0889351                                          | 50310093.37                           | 81.4364434                                                 | -22.24350452                          |
| 114.7677242                                          | 47945500.12                           | 83.51215542                                                | -80.9569664                           |
| 85.67310884                                          | 30146966.62                           | 61.57111212                                                | -49.39444733                          |
| 65.96770585                                          | 1411329.357                           | 46.00557315                                                | 45.04079056                           |
| 92.57736041                                          | 22616201.76                           | 65.09242514                                                | -22.99939919                          |
| 104.9336191                                          | 73408691.1                            | 76.14655048                                                | -58.36161041                          |
| 118.9784796                                          | 26933690.14                           | 89.95457697                                                | -98.22337341                          |
| 105.9276596                                          | 43010400.89                           | 73.29428008                                                | -44.72024155                          |
| 93.18958106                                          | 33062995.17                           | 67.69572691                                                | -27.66505241                          |
| 96.67455693                                          | 75251797.58                           | 68.08974287                                                | -34.73840714                          |
| 113.4153995                                          | 39544322.98                           | 82.49703817                                                | -32.71643066                          |
| 119.3200347                                          | 46040241.78                           | 83.78087656                                                | -72.89670181                          |
| 96.39994788                                          | 96444504.42                           | 63.23515465                                                | -6.977231979                          |
| 86.20763573                                          | 7661545.634                           | 61.97436453                                                | -32.14671803                          |
| 78.3794821                                           | 106651457.3                           | 50.38728863                                                | -19.93476295                          |
| 118.7744763                                          | 37606490.8                            | 89.48752599                                                | -92.29153061                          |
| 53.97103647                                          | 32600165.04                           | 32.60571127                                                | 3.488346457                           |
| 129.2510256                                          | 60262291.71                           | 94.03694793                                                | -16.48976898                          |
| 115.7039848                                          | 32316942.17                           | 84.41900782                                                | -59.58115578                          |
| 74.20929053                                          | 16360752.59                           | 44.38140358                                                | -9.999939442                          |
| 111.7211798                                          | 43650509.92                           | 82.13652699                                                | -16.41261673                          |
| 84.08905856                                          | 60717965.63                           | 58.50819589                                                | -13.55196667                          |
| 77.46375708                                          | 6078482.285                           | 52.76918797                                                | -42.19275665                          |
| 103.7254907                                          | 6941717.837                           | 69.40434604                                                | 0.517222106                           |
| 104.6749426                                          | 7613892.625                           | 75.00313124                                                | -5.057620764                          |
| 115.9823199                                          | 30872175.33                           | 85.83768083                                                | -85.79177856                          |
| 109.0548909                                          | 54381659.12                           | 77.57210072                                                | 26.3972435                            |
| 56.36065452                                          | 53049327.96                           | 32.90843973                                                | -5.925783873                          |
| 80.5153629                                           | 18766251.87                           | 54.38800424                                                | -40.47599411                          |
| 144.0741636                                          | 19940066.45                           | 104.623467                                                 | 12.71061611                           |
| 119.0014                                             | 24904935.86                           | 88.98604668                                                | -28.50274658                          |
| 94.35911786                                          | 57725087.31                           | 66.39445242                                                | -23.84447861                          |
| 112.9872027                                          | 42959613.03                           | 87.63291182                                                | -61.41459656                          |
| 101.5721173                                          | 19331455.75                           | 73.64646248                                                | -88.87288666                          |
| 69.54658578                                          | 98302334.18                           | 43.65928526                                                | 4.0403409                             |
| 97.19952607                                          | 20433077.89                           | 67.8160148                                                 | -32.77810669                          |
| 121.7530009                                          | 57190424.9                            | 86.4770508                                                 | 12.64208508                           |
| 112.1287205                                          | 157854085.1                           | 80.25099001                                                | -8.344539642                          |
| 109.6342823                                          | 40924179.26                           | 74.0394155                                                 | -1.750467896                          |
| 92.49858485                                          | 9000218.119                           | 68.04820935                                                | -29.41602516                          |
| 112.0172992                                          | 66805491.71                           | 79.51982791                                                | -10.71682644                          |
| 113.4491477                                          | 14761883                              | 80.23358625                                                | -102.4497604                          |
| 100.9493143                                          | 87900498.11                           | 69.96231098                                                | -49.76289368                          |
| 83.33693848                                          | 83573822.25                           | 58.56979552                                                | -11.48411465                          |
| 101.4649143                                          | 33440065.77                           | 73.02496267                                                | 27.70581722                           |
| 113.9803667                                          | 10390793.39                           | 88.66244354                                                | -53.7456398                           |
| 98.46633385                                          | 84202201.57                           | 64.87292164                                                | -14.85362053                          |
| 129.2416285                                          | 34332436.75                           | 100.9810829                                                | -52.13392258                          |
| 91.69882836                                          | 16262172.34                           | 66.7035486                                                 | -73.26248169                          |
| 84.77451449                                          | 55261729.54                           | 52.87950278                                                | -23.66396046                          |
| 80.86983079                                          | 8393760.063                           | 61.57841861                                                | -3.360663891                          |
| 102.8557463                                          | 35001473.31                           | 74.81086998                                                | -6.312240601                          |
| 128.7398854                                          | 10908344.1                            | 85.87465154                                                | -46.64061737                          |
| 101.6953174                                          | 22676217.65                           | 72.50030162                                                | -40.89031982                          |
| 77.34671358                                          | 22231912.11                           | 54.21531448                                                | -50.67543793                          |
| 125.1188272                                          | 42859131.02                           | 90.45255348                                                | -92.24364853                          |
| 104.8256635                                          | 14587483.4                            | 75.66264184                                                | -16.53439903                          |
| 100.5913892                                          | 38399214.61                           | 73.83946535                                                | -50.26052666                          |
| 81.13706863                                          | 26973721.03                           | 56.85071413                                                | -68.5474472                           |
| 92.28431273                                          | 40170342.42                           | 59.42665757                                                | -20.87626648                          |
| 112.6845204                                          | 12226970.89                           | 72.29789032                                                | -2.616868019                          |
| 99.57801811                                          | 22521077.47                           | 73.31826571                                                | -53.99663734                          |
| 83.18212577                                          | 49912505.9                            | 51.13696458                                                | -9.441860676                          |
| 83.79452321                                          | 19861806.96                           | 58.0740866                                                 | -36.45606613                          |
| 115.4499195                                          | 27485908.65                           | 83.06499002                                                | 5.887853146                           |
| 115.1248371                                          | 17264540.05                           | 80.36384827                                                | 11.81712532                           |
| 80.99012137                                          | 30462659.84                           | 52.31615505                                                | -24.63309002                          |
| 85.13147506                                          | 51960477.35                           | 60.66139786                                                | -23.2854023                           |
| 97.78737035                                          | 51475486.61                           | 69.24207761                                                | 0.932917267                           |
| 77.12759847                                          | 29521967.79                           | 56.36585357                                                | -13.18666649                          |
| 135.7193182                                          | 66428633.17                           | 99.70238889                                                | -23.7047596                           |
| 111.6974917                                          | 43446590.61                           | 84.50340121                                                | -2.474427342                          |
| 105.0934312                                          | 10105784.7                            | 78.5912502                                                 | -114.8541183                          |
| 80.00457195                                          | 2846287.734                           | 56.09922847                                                | -7.915333748                          |
| 102.5028428                                          | 148189450.5                           | 72.80613689                                                | 15.0891633                            |

| log.sigma.5.0.mm.3D_firstorder_TotalEnergy | log.sigma.5.0.mm.3D_firstorder_Maximum | log.sigma.5.0.mm.3D_firstorder_RootMeanSquared | log.sigma.5.0.mm.3D_firstorder_90Percentile | log.sigma.5.0.mm.3D_firstorder_Minimum |
|--------------------------------------------|----------------------------------------|------------------------------------------------|---------------------------------------------|----------------------------------------|
| 1172763871                                 | 312.032074                             | 173.4362244                                    | 134.0296997                                 | -459.5888672                           |
| 260762271.1                                | 277.1914673                            | 166.8306177                                    | 143.4803284                                 | -486.8921204                           |
| 555370758.3                                | 373.5210571                            | 151.8543354                                    | 178.3531769                                 | -439.3548584                           |
| 255198324.4                                | 310.91922                              | 171.3282943                                    | 169.800293                                  | -468.6414795                           |
| 747616933.2                                | 359.4605713                            | 140.0858197                                    | 172.612381                                  | -315.1899719                           |
| 157838021                                  | 306.2545166                            | 155.4233439                                    | 207.0106201                                 | -370.8814392                           |
| 3107967845                                 | 538.4494019                            | 104.5097176                                    | 133.8959167                                 | -267.137085                            |
| 2963671710                                 | 429.935791                             | 134.496313                                     | 137.9548401                                 | -384.7572937                           |
| 1629755655                                 | 394.3720398                            | 119.0070373                                    | 155.459671                                  | -287.9004517                           |
| 335127553.4                                | 353.1862793                            | 128.2182102                                    | 200.8085754                                 | -250.1890869                           |
| 292928268.5                                | 299.5086365                            | 83.50143977                                    | 136.1261063                                 | -183.0559845                           |
| 1009791441                                 | 408.1882324                            | 104.7726416                                    | 139.7555786                                 | -266.3261414                           |
| 612326760.2                                | 302.6298218                            | 167.2242707                                    | 120.6342926                                 | -462.2403564                           |
| 710889751.9                                | 278.0654297                            | 202.1977465                                    | 88.2465416                                  | -523.0565186                           |
| 911942416.1                                | 376.8243408                            | 146.4406159                                    | 101.479097                                  | -337.4417725                           |
| 2353781658                                 | 424.7654419                            | 123.0026811                                    | 182.8904694                                 | -283.3049011                           |
| 191665428                                  | 238.2481537                            | 89.66225513                                    | 115.947966                                  | -213.1385651                           |
| 459582170                                  | 287.7087402                            | 204.0037025                                    | 114.6573822                                 | -515.6225586                           |
| 240855817                                  | 228.8666382                            | 90.30005748                                    | 82.60814285                                 | -240.1229248                           |
| 3882948683                                 | 514.4251709                            | 125.1430257                                    | 182.6525635                                 | -617.6329956                           |
| 1020111423                                 | 296.1750488                            | 134.8401266                                    | 163.9666367                                 | -318.309845                            |
| 226065282.4                                | 246.4473877                            | 129.9254457                                    | 139.0194626                                 | -377.0227661                           |
| 279092117.5                                | 329.9560242                            | 136.1052269                                    | 129.7897354                                 | -365.2116089                           |
| 734910206.2                                | 357.5086365                            | 86.98914022                                    | 87.45931396                                 | -260.5171814                           |
| 820823110.8                                | 369.1930542                            | 157.341658                                     | 148.9229477                                 | -461.9919128                           |
| 1358372521                                 | 485.3682251                            | 140.296597                                     | 200.1236115                                 | -345.8586121                           |
| 1294528503                                 | 330.3343506                            | 154.6767606                                    | 121.73032                                   | -436.5361328                           |
| 813968098.6                                | 296.6214294                            | 115.6754544                                    | 90.08951111                                 | -309.3175049                           |
| 38105892.64                                | 268.7146606                            | 98.31906952                                    | 163.9380646                                 | -175.0765991                           |
| 610637447.5                                | 362.5942078                            | 118.5214339                                    | 120.9591522                                 | -308.0752563                           |
| 1982034660                                 | 373.7902527                            | 135.3180442                                    | 138.3182922                                 | -347.703186                            |
| 727209633.8                                | 169.9447021                            | 184.877824                                     | 57.75551758                                 | -511.0927734                           |
| 1161280824                                 | 467.0109863                            | 135.7198287                                    | 156.569989                                  | -353.4013062                           |
| 892700869.5                                | 437.9380798                            | 117.0071845                                    | 141.1823242                                 | -325.5610962                           |
| 2031798535                                 | 402.9729614                            | 121.0801101                                    | 152.5940582                                 | -304.696106                            |
| 1067696720                                 | 296.4309082                            | 142.8082074                                    | 141.1983826                                 | -409.2975464                           |
| 1243086528                                 | 270.2858582                            | 174.4989838                                    | 85.6948349                                  | -529.9584961                           |
| 2604001619                                 | 473.7154846                            | 128.7181956                                    | 165.7237549                                 | -355.7312622                           |
| 206861732.1                                | 173.7042236                            | 116.967224                                     | 74.55136032                                 | -330.2492371                           |
| 2879589347                                 | 485.2563171                            | 106.251835                                     | 108.3168274                                 | -434.4906921                           |
| 1015375252                                 | 310.5802002                            | 167.5247605                                    | 96.96193161                                 | -402.7659607                           |
| 880204456.1                                | 424.9648132                            | 75.81266934                                    | 100.8185699                                 | -278.7063293                           |
| 1627081876                                 | 438.3611145                            | 157.8682059                                    | 185.461409                                  | -406.3552856                           |
| 872557438.6                                | 386.7780457                            | 150.8589075                                    | 140.3360718                                 | -360.8354187                           |
| 441740320                                  | 402.5710144                            | 102.5408333                                    | 110.7459755                                 | -282.9338989                           |
| 1178563768                                 | 358.4256897                            | 134.8337399                                    | 180.7187347                                 | -326.48703                             |
| 1639385072                                 | 402.7824402                            | 106.5224461                                    | 128.6678772                                 | -331.1473694                           |
| 164119021.7                                | 199.5023804                            | 111.2645541                                    | 66.24622345                                 | -288.9355164                           |
| 187426381.6                                | 418.9590454                            | 133.2432139                                    | 191.3913727                                 | -266.1334229                           |
| 205575100.9                                | 251.141861                             | 129.7878854                                    | 160.5911377                                 | -350.9295044                           |
| 833548733.8                                | 355.5379028                            | 154.8796443                                    | 130.1278168                                 | -354.679718                            |
| 1468304796                                 | 426.2032166                            | 139.7377116                                    | 221.8722076                                 | -356.8908081                           |
| 1432331855                                 | 410.83078                              | 81.55439505                                    | 78.31203461                                 | -253.6583099                           |
| 506688800.4                                | 342.0239563                            | 106.906028                                     | 107.9578339                                 | -353.2345886                           |
| 538381794.3                                | 368.9179688                            | 176.0993748                                    | 224.256369                                  | -449.9308472                           |
| 672433268.2                                | 324.6608887                            | 145.5254842                                    | 168.5051727                                 | -327.9355774                           |
| 1558577357                                 | 463.8245239                            | 119.905616                                     | 144.3291107                                 | -314.1368713                           |
| 1159909552                                 | 278.460907                             | 144.1650351                                    | 123.6070801                                 | -398.4609375                           |
| 521949305.3                                | 192.4259491                            | 159.1732233                                    | 61.5877861                                  | -456.9786072                           |
| 2654163023                                 | 462.4416199                            | 94.99662219                                    | 113.5749664                                 | -321.8074036                           |
| 551693103.1                                | 398.3556519                            | 123.9950662                                    | 137.4199646                                 | -336.8207092                           |
| 1544141472                                 | 490.7164307                            | 152.3186913                                    | 224.132901                                  | -412.4152527                           |
| 4262060298                                 | 513.9681396                            | 138.4594115                                    | 199.5203217                                 | -445.5875549                           |
| 1104952840                                 | 434.0725708                            | 139.7315093                                    | 175.5614243                                 | -388.8535767                           |
| 243005889.2                                | 278.5713501                            | 115.3007635                                    | 128.4056946                                 | -289.5634155                           |
| 1803748276                                 | 464.4614563                            | 139.7428336                                    | 168.211319                                  | -426.0013733                           |
| 398570841.1                                | 129.3635406                            | 190.681194                                     | 23.07150555                                 | -520.5953369                           |
| 2373313449                                 | 448.0667419                            | 131.4771222                                    | 142.768573                                  | -384.9571533                           |
| 2256493201                                 | 427.8082581                            | 105.50499                                      | 117.8178825                                 | -317.5823975                           |
| 902881775.7                                | 336.1057434                            | 125.4747402                                    | 178.9999863                                 | -334.0100403                           |
| 280551421.6                                | 246.5954437                            | 145.3254925                                    | 109.8106453                                 | -330.9280396                           |
| 2273459442                                 | 439.539093                             | 130.0179914                                    | 156.6131897                                 | -341.562439                            |
| 926975792.3                                | 348.3767395                            | 160.3657728                                    | 138.6388733                                 | -362.1427917                           |
| 439078653.2                                | 303.7845459                            | 130.8360659                                    | 88.42691498                                 | -316.6785889                           |
| 1492066697                                 | 522.335144                             | 116.3240113                                    | 133.6792801                                 | -349.3266907                           |
| 226631521.7                                | 228.7175903                            | 95.62180442                                    | 120.0277977                                 | -223.2439423                           |
| 945039779.3                                | 379.634613                             | 125.8766872                                    | 152.3628632                                 | -356.6951599                           |
| 294525290.7                                | 219.22995                              | 183.7714971                                    | 87.93317566                                 | -575.6700439                           |
| 612257876.6                                | 341.9759521                            | 131.3174474                                    | 202.4661194                                 | -312.7051392                           |
| 600261627                                  | 341.6942444                            | 111.1353332                                    | 69.56253433                                 | -349.7572937                           |
| 1157196538                                 | 308.11203                              | 174.5938816                                    | 129.6841202                                 | -459.5888672                           |
| 393862051.9                                | 238.9956207                            | 132.8924058                                    | 117.0621758                                 | -400.213501                            |
| 1036778795                                 | 352.302887                             | 129.718928                                     | 124.0644615                                 | -318.1836853                           |
| 728290467.8                                | 328.2798767                            | 119.3699807                                    | 74.56728363                                 | -326.7531433                           |
| 1084599245                                 | 416.4957886                            | 121.637602                                     | 153.6101776                                 | -304.6375427                           |
| 330128214                                  | 312.7130127                            | 151.7442273                                    | 96.17681885                                 | -555.7094116                           |
| 608069091.6                                | 306.4538879                            | 131.2171831                                    | 101.7912476                                 | -367.7503052                           |
| 1347637659                                 | 435.8415222                            | 114.06841                                      | 152.8822174                                 | -276.6743469                           |
| 536268787.8                                | 341.4944153                            | 108.0580737                                    | 123.0627289                                 | -307.9526978                           |
| 742119533.6                                | 371.3859558                            | 141.7982242                                    | 178.804715                                  | -324.9685974                           |
| 466142581.4                                | 315.2445068                            | 146.5377375                                    | 223.1434357                                 | -463.0202637                           |
| 822491815.6                                | 328.3576355                            | 109.6862174                                    | 107.6487312                                 | -362.276001                            |
| 1402932888                                 | 399.1308594                            | 107.4439731                                    | 116.7870102                                 | -358.9727783                           |
| 1389838138                                 | 456.3809204                            | 122.2200885                                    | 181.1914673                                 | -295.1571655                           |
| 797093130.3                                | 281.1937561                            | 94.48340882                                    | 117.7282516                                 | -286.9425049                           |
| 1793573096                                 | 431.7799377                            | 166.9262099                                    | 187.4568359                                 | -414.2307434                           |
| 1173057946                                 | 403.5227966                            | 133.1121254                                    | 175.6261337                                 | -292.193512                            |
| 272856186.9                                | 114.1736832                            | 179.6854253                                    | 14.63889542                                 | -475.9481201                           |
| 76849768.83                                | 194.5317993                            | 103.0556967                                    | 80.84061356                                 | -316.4042664                           |
| 4001115164                                 | 429.1925659                            | 129.5913142                                    | 196.5262268                                 | -385.1822815                           |

| log.sigma.5.0.mm.3D_firstorder_Entropy | log.sigma.5.0.mm.3D_firstorder_StandardDeviation | log.sigma.5.0.mm.3D_firstorder_Range | log.sigma.5.0.mm.3D_firstorder_Variance | log.sigma.5.0.mm.3D_firstorder_10Percentile |
|----------------------------------------|--------------------------------------------------|--------------------------------------|-----------------------------------------|---------------------------------------------|
| 4.627004213                            | 153.7074516                                      | 771.6209412                          | 23625.98066                             | -272.3903748                                |
| 4.596656193                            | 158.3157714                                      | 764.0835876                          | 25063.88346                             | -286.147699                                 |
| 4.57970671                             | 150.8957123                                      | 812.8759155                          | 22769.51599                             | -224.9277664                                |
| 4.63162535                             | 162.044141                                       | 779.5606995                          | 26258.30362                             | -281.2143433                                |
| 4.471079814                            | 139.7956528                                      | 674.6505432                          | 19542.82454                             | -211.8651581                                |
| 4.578169888                            | 154.8716529                                      | 677.1359558                          | 23985.22888                             | -208.5595276                                |
| 3.970198191                            | 103.7732791                                      | 805.5864868                          | 10768.89345                             | -137.0053619                                |
| 4.375846181                            | 130.0875836                                      | 814.6930847                          | 16922.7794                              | -192.5435852                                |
| 4.161338466                            | 117.2660204                                      | 682.2724915                          | 13751.31954                             | -159.6405869                                |
| 4.300956335                            | 124.3200358                                      | 603.3753662                          | 15455.47131                             | -138.3637207                                |
| 3.676949544                            | 81.40869027                                      | 482.564621                           | 6627.374851                             | -76.45198822                                |
| 4.049594378                            | 104.7658741                                      | 674.5143738                          | 10975.88838                             | -133.6541412                                |
| 4.602589795                            | 157.1737227                                      | 764.8701782                          | 24703.5791                              | -286.0708618                                |
| 4.687547117                            | 167.6625641                                      | 801.1219482                          | 28110.73539                             | -359.5563629                                |
| 4.322886516                            | 126.5624009                                      | 714.2661133                          | 16018.04132                             | -229.1431549                                |
| 4.254819834                            | 122.9966336                                      | 708.070343                           | 15128.17188                             | -156.023407                                 |
| 3.851890615                            | 89.54900493                                      | 451.3867188                          | 8019.024284                             | -115.4386808                                |
| 4.71508772                             | 169.7654979                                      | 803.3312988                          | 28820.32426                             | -359.5583923                                |
| 3.742420185                            | 83.924392                                        | 468.989563                           | 7043.303572                             | -136.1891312                                |
| 4.311622153                            | 123.2485902                                      | 1132.058167                          | 15190.21498                             | -128.3674286                                |
| 4.397487635                            | 134.7743363                                      | 614.4848938                          | 18164.12174                             | -197.7574188                                |
| 4.278527789                            | 129.2992431                                      | 623.4701538                          | 16718.29428                             | -203.3709946                                |
| 4.395558016                            | 130.8557019                                      | 695.1676331                          | 17123.21472                             | -211.1912643                                |
| 3.716355318                            | 85.15667073                                      | 618.0258179                          | 7251.65857                              | -122.4651245                                |
| 4.534508294                            | 146.1474325                                      | 831.184967                           | 21359.07203                             | -243.0518097                                |
| 4.482703584                            | 140.2955499                                      | 831.2268372                          | 19682.84132                             | -168.5464249                                |
| 4.490641533                            | 139.734774                                       | 766.8704834                          | 19525.80707                             | -232.6344345                                |
| 4.099993048                            | 105.447176                                       | 605.9389343                          | 11119.10694                             | -183.6606598                                |
| 3.700823563                            | 82.31355574                                      | 443.7912598                          | 6775.521459                             | -46.85344315                                |
| 4.228883099                            | 115.7488785                                      | 670.6694641                          | 13397.80287                             | -176.4726089                                |
| 4.354175975                            | 128.418722                                       | 721.4934387                          | 16491.36816                             | -197.647699                                 |
| 4.448145967                            | 141.7767366                                      | 681.0374756                          | 20100.64304                             | -323.7685577                                |
| 4.412242407                            | 132.9109639                                      | 820.4122925                          | 17665.32433                             | -186.6075775                                |
| 4.185732849                            | 114.7185781                                      | 763.499176                           | 13160.35217                             | -163.8005096                                |
| 4.252810827                            | 119.9759337                                      | 707.6690674                          | 14394.22468                             | -155.6341431                                |
| 4.467497923                            | 138.7438327                                      | 705.7284546                          | 19249.85111                             | -223.4100281                                |
| 4.546224696                            | 148.2793461                                      | 800.2443542                          | 21986.76447                             | -310.3920044                                |
| 4.252396757                            | 127.8267112                                      | 829.4467468                          | 16339.6681                              | -180.5365143                                |
| 4.041602228                            | 106.1425508                                      | 503.9534607                          | 11266.24109                             | -205.3866043                                |
| 4.057454105                            | 104.6276108                                      | 919.7470093                          | 10946.93694                             | -143.447049                                 |
| 4.496873411                            | 141.4206288                                      | 713.3461609                          | 19999.79424                             | -273.3764771                                |
| 3.53955224                             | 75.35123078                                      | 703.6711426                          | 5677.807981                             | -79.93086166                                |
| 4.668150465                            | 157.305015                                       | 844.7164001                          | 24744.86773                             | -214.2463364                                |
| 4.502028439                            | 140.9414769                                      | 747.6134644                          | 19864.4999                              | -238.607341                                 |
| 3.96438295                             | 102.2346234                                      | 685.5049133                          | 10451.91823                             | -139.4245605                                |
| 4.44083496                             | 134.7671601                                      | 684.9121797                          | 18162.18744                             | -178.1065521                                |
| 4.107371199                            | 105.9362501                                      | 733.9298096                          | 11222.48908                             | -148.6032562                                |
| 3.949857492                            | 98.28849065                                      | 488.4378967                          | 9660.627393                             | -188.5276642                                |
| 4.374045019                            | 132.8182441                                      | 685.0924683                          | 17640.68595                             | -152.717453                                 |
| 4.339271602                            | 129.4234159                                      | 602.0713654                          | 16750.42057                             | -188.5026459                                |
| 4.434705255                            | 139.7497588                                      | 710.2176208                          | 19529.99509                             | -234.580835                                 |
| 4.455244966                            | 135.1420762                                      | 783.0940247                          | 18263.38076                             | -129.0871216                                |
| 3.574024698                            | 81.01266352                                      | 664.48909                            | 6563.05165                              | -110.5553246                                |
| 4.044146074                            | 102.9575901                                      | 695.2585449                          | 10600.26535                             | -148.7924438                                |
| 4.766217668                            | 176.0925968                                      | 818.8488159                          | 31008.60264                             | -251.4230072                                |
| 4.492025774                            | 142.7104033                                      | 652.5964661                          | 20366.2592                              | -221.6816254                                |
| 4.242891123                            | 118.4792827                                      | 777.9613953                          | 14037.34043                             | -162.4434479                                |
| 4.358255532                            | 132.5168362                                      | 676.9218445                          | 17560.71188                             | -236.314917                                 |
| 4.303879813                            | 123.9414001                                      | 649.4045563                          | 15361.47066                             | -267.6499451                                |
| 3.877438627                            | 94.99441534                                      | 784.2490234                          | 9023.938947                             | -121.5947464                                |
| 4.299471747                            | 121.6678058                                      | 735.1763611                          | 14803.05496                             | -169.5894714                                |
| 4.617470391                            | 151.3301358                                      | 903.1316833                          | 22900.81                                | -179.5652069                                |
| 4.478811845                            | 137.9912679                                      | 959.5556946                          | 19041.59001                             | -156.5707169                                |
| 4.499204758                            | 139.6240814                                      | 822.9261475                          | 19494.8841                              | -190.2799911                                |
| 4.170862496                            | 112.3518047                                      | 568.1347656                          | 12622.92802                             | -174.2362671                                |
| 4.512925524                            | 139.306123                                       | 890.4628296                          | 19406.19592                             | -189.6881866                                |
| 4.371105851                            | 139.9276444                                      | 649.9588776                          | 19579.74568                             | -339.9034729                                |
| 4.349302546                            | 127.1386078                                      | 833.0238953                          | 16164.22559                             | -180.1886261                                |
| 4.080187825                            | 104.7394                                         | 745.3906555                          | 10970.34191                             | -145.9207031                                |
| 4.318085982                            | 124.0533813                                      | 670.1157837                          | 15389.2414                              | -147.5268539                                |
| 4.334353726                            | 132.9499462                                      | 577.5234833                          | 17675.6882                              | -235.5560211                                |
| 4.351644038                            | 129.3169434                                      | 781.101532                           | 16722.87185                             | -188.0406358                                |
| 4.529781735                            | 150.5904472                                      | 710.5195313                          | 22677.48278                             | -255.4387878                                |
| 4.16698547                             | 111.8881118                                      | 620.4631348                          | 12518.94957                             | -209.0465302                                |
| 4.155464961                            | 115.0076368                                      | 871.6618347                          | 13226.75653                             | -154.7791214                                |
| 3.926819619                            | 95.49136306                                      | 451.9615326                          | 9118.600419                             | -128.7291824                                |
| 4.355411149                            | 125.6444256                                      | 736.3297729                          | 15786.52169                             | -170.4721161                                |
| 4.538209125                            | 161.7174222                                      | 794.8999939                          | 26152.52466                             | -333.2759583                                |
| 4.350524174                            | 125.4619287                                      | 654.6810913                          | 15740.69554                             | -128.8061859                                |
| 3.989378384                            | 97.15571892                                      | 691.4515381                          | 9439.233719                             | -180.8846329                                |
| 4.626104211                            | 153.2449996                                      | 767.7008972                          | 23484.0299                              | -275.4046631                                |
| 4.338185955                            | 127.9231981                                      | 639.2091217                          | 16364.3446                              | -219.9150085                                |
| 4.284738734                            | 122.0027098                                      | 670.4865723                          | 14884.6612                              | -198.0062073                                |
| 4.055083741                            | 101.448228                                       | 655.03302                            | 10291.74296                             | -188.0325195                                |
| 4.252744308                            | 121.2582878                                      | 721.1333313                          | 14703.57236                             | -155.7609558                                |
| 4.370722295                            | 146.1874435                                      | 868.4224243                          | 21370.76864                             | -269.5550232                                |
| 4.286546353                            | 120.778416                                       | 674.2041931                          | 14587.42577                             | -208.849147                                 |
| 4.092524079                            | 113.9858514                                      | 712.5158691                          | 12992.77432                             | -149.3010483                                |
| 4.09466428                             | 105.2122353                                      | 649.447113                           | 11069.61445                             | -152.6164246                                |
| 4.501714165                            | 141.7816182                                      | 696.3545532                          | 20102.02725                             | -199.5774902                                |
| 4.490587961                            | 145.6286228                                      | 778.2647705                          | 21207.69578                             | -159.4764755                                |
| 4.101964976                            | 106.906437                                       | 690.6336365                          | 11428.98627                             | -162.7770752                                |
| 4.113246608                            | 105.8181171                                      | 758.1036377                          | 11197.4739                              | -151.4011536                                |
| 4.292241109                            | 121.3272682                                      | 751.5380859                          | 14720.30602                             | -129.4805374                                |
| 3.934009365                            | 93.92251697                                      | 568.136261                           | 8821.439195                             | -131.4053345                                |
| 4.730223786                            | 164.6799139                                      | 846.0106812                          | 27119.47404                             | -245.2398773                                |
| 4.40313827                             | 133.1116881                                      | 695.7163086                          | 17718.72152                             | -175.9039932                                |
| 4.254987162                            | 125.6891877                                      | 590.1218033                          | 15797.7719                              | -303.8354248                                |
| 3.926833422                            | 99.45866373                                      | 510.9360657                          | 9892.02579                              | -168.2715393                                |
| 4.37777265                             | 127.6509306                                      | 814.3748474                          | 16294.76008                             | -144.061937                                 |

| log.sigma.5.0.mm.3D_firstorder_Kurtosis | log.sigma.5.0.mm.3D_firstorder_Mean | log.sigma.5.0.mm.3D_glrIm_ShortRunLowGrayLevelEmphasis | log.sigma.5.0.mm.3D_glrIm_GrayLevelVariance |
|-----------------------------------------|-------------------------------------|--------------------------------------------------------|---------------------------------------------|
| 2.482806215                             | -80.33768266                        | 0.007793795                                            | 38.13495286                                 |
| 2.665924254                             | -52.61721728                        | 0.009480058                                            | 39.99326382                                 |
| 2.302628232                             | -17.03593798                        | 0.006643783                                            | 36.59614502                                 |
| 2.595958718                             | -55.63345054                        | 0.014529225                                            | 42.3117729                                  |
| 2.342879681                             | -9.01178928                         | 0.020106489                                            | 31.50979486                                 |
| 2.284676175                             | 13.08384246                         | 0.013566561                                            | 38.26393853                                 |
| 4.038899627                             | -12.38497571                        | 0.01460416                                             | 19.34085928                                 |
| 3.329114575                             | -34.15375275                        | 0.006494941                                            | 28.11918069                                 |
| 3.37665771                              | -20.28189813                        | 0.012234348                                            | 23.32339763                                 |
| 2.216633542                             | 31.37575662                         | 0.012957345                                            | 25.28364429                                 |
| 2.983841757                             | 18.57728702                         | 0.017948717                                            | 11.07993376                                 |
| 3.59908288                              | -1.190818321                        | 0.01455846                                             | 18.79481551                                 |
| 2.460294481                             | -57.09971641                        | 0.009846954                                            | 39.46082304                                 |
| 2.413831929                             | -113.0185529                        | 0.014901519                                            | 44.61755005                                 |
| 3.132219499                             | -73.66690349                        | 0.016320214                                            | 26.37251772                                 |
| 2.765860563                             | 1.21970654                          | 0.012396158                                            | 25.82910905                                 |
| 2.581047432                             | -4.505076037                        | 0.023049231                                            | 13.03826843                                 |
| 2.497613771                             | -113.1246497                        | 0.015915084                                            | 46.13809851                                 |
| 3.302898317                             | -33.32861846                        | 0.026589708                                            | 12.12803821                                 |
| 3.490324585                             | 21.69243905                         | 0.001606133                                            | 25.32720428                                 |
| 2.236387366                             | -4.211652576                        | 0.01695056                                             | 29.05977113                                 |
| 2.921399896                             | -12.74076803                        | 0.010991809                                            | 26.81406553                                 |
| 2.78237523                              | -37.43551867                        | 0.015742635                                            | 27.52153311                                 |
| 4.188362845                             | -17.76096693                        | 0.012888754                                            | 12.79436882                                 |
| 2.591358568                             | -58.28657933                        | 0.006729732                                            | 35.18285186                                 |
| 2.8101862                               | 0.542031659                         | 0.010042311                                            | 32.10147                                    |
| 2.612128904                             | -66.3256601                         | 0.007423624                                            | 31.77130377                                 |
| 2.705146206                             | -47.5573739                         | 0.013316718                                            | 18.12962981                                 |
| 2.829196365                             | 53.76911727                         | 0.019393433                                            | 11.21268366                                 |
| 2.892468305                             | -25.48582773                        | 0.01321966                                             | 21.71889079                                 |
| 2.714737872                             | -42.65682742                        | 0.011866595                                            | 26.87828598                                 |
| 2.310673793                             | -118.6556648                        | 0.008481593                                            | 32.29239967                                 |
| 3.112650191                             | -27.4690294                         | 0.008380922                                            | 28.86039271                                 |
| 2.787167393                             | -23.02887447                        | 0.007935744                                            | 21.49141028                                 |
| 2.909563004                             | -16.31466778                        | 0.009887668                                            | 23.89275314                                 |
| 2.526613719                             | -33.8279913                         | 0.010284096                                            | 31.11514516                                 |
| 2.766616982                             | -91.99527644                        | 0.005995013                                            | 35.48272773                                 |
| 3.24186065                              | -15.12302186                        | 0.00722782                                             | 28.73054715                                 |
| 2.623419876                             | -49.14356926                        | 0.016706583                                            | 18.28424858                                 |
| 4.332216658                             | -18.50717441                        | 0.003611626                                            | 18.75671869                                 |
| 2.29777004                              | -89.80395946                        | 0.01156713                                             | 32.1760453                                  |
| 5.173915202                             | 8.351817257                         | 0.006748507                                            | 10.09156176                                 |
| 2.577511168                             | -13.32301398                        | 0.007127791                                            | 39.65991159                                 |
| 2.539903435                             | -53.79507485                        | 0.013917759                                            | 31.75631465                                 |
| 4.075187973                             | -7.918602346                        | 0.011716306                                            | 18.1543584                                  |
| 2.395787246                             | -4.236740757                        | 0.009213877                                            | 29.33838204                                 |
| 3.029630505                             | -11.15985837                        | 0.006832694                                            | 18.56049501                                 |
| 2.848896524                             | -52.14569584                        | 0.029459559                                            | 15.66308554                                 |
| 3.043228096                             | 10.63334869                         | 0.028923559                                            | 28.62817128                                 |
| 2.485961548                             | -9.719805422                        | 0.011066447                                            | 26.98131762                                 |
| 2.549635133                             | -66.76607766                        | 0.011994032                                            | 31.54427085                                 |
| 2.786158145                             | 35.54219036                         | 0.006182144                                            | 29.66111565                                 |
| 5.663213218                             | -9.38443936                         | 0.010722519                                            | 12.43530747                                 |
| 3.378725632                             | -28.7859944                         | 0.006855402                                            | 17.73984382                                 |
| 2.473086495                             | -1.545050292                        | 0.015717738                                            | 49.90194475                                 |
| 2.214965249                             | -28.48521271                        | 0.013710801                                            | 32.42847425                                 |
| 3.14472428                              | -18.43953129                        | 0.010266131                                            | 23.20997019                                 |
| 2.039936792                             | -56.77011063                        | 0.008979416                                            | 28.09900977                                 |
| 2.548617676                             | -99.87314127                        | 0.008707142                                            | 24.82637575                                 |
| 4.170373773                             | -0.647519241                        | 0.007767347                                            | 16.60315974                                 |
| 3.073221966                             | -23.91069807                        | 0.010406593                                            | 24.22658409                                 |
| 2.643601112                             | 17.32552243                         | 0.0051826                                              | 37.19025981                                 |
| 2.81388637                              | 11.37623069                         | 0.003672291                                            | 31.33919585                                 |
| 2.989603076                             | -5.478191672                        | 0.00811334                                             | 31.82306092                                 |
| 2.327970038                             | -25.91019164                        | 0.019542972                                            | 20.49437428                                 |
| 2.922030103                             | -11.0391861                         | 0.004807373                                            | 31.46438367                                 |
| 2.738149655                             | -129.5359875                        | 0.012140951                                            | 31.74889137                                 |
| 3.205242154                             | -33.49638878                        | 0.006634608                                            | 26.52740371                                 |
| 3.249925099                             | -12.68704062                        | 0.008205823                                            | 18.01681023                                 |
| 2.472687254                             | 18.83265867                         | 0.007166468                                            | 25.00959431                                 |
| 1.976424003                             | -58.68398896                        | 0.021391284                                            | 28.3617698                                  |
| 3.280189581                             | -13.48355431                        | 0.010323662                                            | 27.94019649                                 |
| 2.067492017                             | -55.13345907                        | 0.017254066                                            | 36.19670129                                 |
| 2.594266477                             | -67.81686054                        | 0.018722295                                            | 20.3488952                                  |
| 4.369503737                             | -17.4504746                         | 0.008422743                                            | 22.71820382                                 |
| 2.175414106                             | -4.992901118                        | 0.032192957                                            | 14.7753068                                  |
| 2.624733023                             | -7.643212307                        | 0.008597742                                            | 25.70626906                                 |
| 3.131464178                             | -87.28939511                        | 0.008074392                                            | 42.24359892                                 |
| 2.570600143                             | 38.77597755                         | 0.009138121                                            | 25.72413753                                 |
| 3.085282383                             | -53.96136179                        | 0.010214523                                            | 15.63532498                                 |
| 2.506026842                             | -83.65998797                        | 0.008810096                                            | 37.94805915                                 |
| 2.611568001                             | -36.00065178                        | 0.008692418                                            | 26.6564274                                  |
| 2.510356882                             | -44.07197605                        | 0.019010731                                            | 24.36640553                                 |
| 2.935258947                             | -62.90826132                        | 0.011767587                                            | 17.06364855                                 |
| 3.414695229                             | -9.598638935                        | 0.010850251                                            | 24.80620121                                 |
| 3.701438835                             | -40.68835073                        | 0.00539844                                             | 35.26689478                                 |
| 2.474799215                             | -51.28862797                        | 0.011450878                                            | 23.45743453                                 |
| 3.67916304                              | -4.339105895                        | 0.011203635                                            | 23.00490261                                 |
| 2.898639189                             | -24.63600719                        | 0.010606287                                            | 18.4790216                                  |
| 2.509236054                             | -2.17005641                         | 0.0197566                                              | 32.48413473                                 |
| 2.850190121                             | 16.29763003                         | 0.005309773                                            | 34.66787896                                 |
| 3.548281041                             | -24.53731895                        | 0.007422695                                            | 19.30768853                                 |
| 3.123619864                             | -18.62078054                        | 0.006300571                                            | 18.30910933                                 |
| 2.919066011                             | 14.74598294                         | 0.010746902                                            | 24.07641694                                 |
| 2.502433857                             | -10.27985148                        | 0.009434729                                            | 14.25764271                                 |
| 2.45250019                              | -27.29259072                        | 0.009132148                                            | 43.60896081                                 |
| 2.274549656                             | 0.341190543                         | 0.016025697                                            | 28.49891711                                 |
| 2.445416096                             | -128.4098134                        | 0.011372693                                            | 25.86905153                                 |
| 2.959827659                             | -26.98982828                        | 0.017188409                                            | 16.16233883                                 |
| 2.66993139                              | 22.34163455                         | 0.004511239                                            | 26.7362716                                  |

| log.sigma.5.0.mm.3D_glrIm_LowGrayLevelRunEmphasis | log.sigma.5.0.mm.3D_glrIm_GrayLevelNonUniformityNormalized | log.sigma.5.0.mm.3D_glrIm_RunVariance | log.sigma.5.0.mm.3D_glrIm_GrayLevelNonUniformity |
|---------------------------------------------------|------------------------------------------------------------|---------------------------------------|--------------------------------------------------|
| 0.008171392                                       | 0.045046267                                                | 0.093844933                           | 60.55390624                                      |
| 0.009787839                                       | 0.04726291                                                 | 0.064560375                           | 15.50615012                                      |
| 0.006891528                                       | 0.045963389                                                | 0.101826344                           | 38.29782017                                      |
| 0.014987498                                       | 0.046833344                                                | 0.05402553                            | 14.35716851                                      |
| 0.021196099                                       | 0.049588994                                                | 0.094332283                           | 65.03251276                                      |
| 0.014130381                                       | 0.04569767                                                 | 0.070627752                           | 10.42033172                                      |
| 0.016212005                                       | 0.073107258                                                | 0.508608755                           | 627.6373157                                      |
| 0.007013424                                       | 0.055788037                                                | 0.169895725                           | 303.0281932                                      |
| 0.013500498                                       | 0.064704871                                                | 0.232765901                           | 240.5434641                                      |
| 0.013748093                                       | 0.054819163                                                | 0.114413729                           | 38.0437993                                       |
| 0.019694933                                       | 0.090135206                                                | 0.220824131                           | 121.8558885                                      |
| 0.016056757                                       | 0.071444451                                                | 0.25621278                            | 209.0680244                                      |
| 0.010256671                                       | 0.046403585                                                | 0.08136694                            | 35.2539805                                       |
| 0.015946752                                       | 0.043573624                                                | 0.056874124                           | 26.66032349                                      |
| 0.017680077                                       | 0.056225174                                                | 0.123695027                           | 80.82831179                                      |
| 0.013508326                                       | 0.057971951                                                | 0.293808295                           | 288.0494593                                      |
| 0.025125843                                       | 0.076789499                                                | 0.150750794                           | 60.46412654                                      |
| 0.016503136                                       | 0.042972967                                                | 0.055091899                           | 16.7263865                                       |
| 0.029210786                                       | 0.087311013                                                | 0.224706232                           | 82.61057968                                      |
| 0.001723359                                       | 0.058901246                                                | 0.167241189                           | 484.0775475                                      |
| 0.017902604                                       | 0.052061595                                                | 0.108113776                           | 100.0304825                                      |
| 0.011591727                                       | 0.060946501                                                | 0.087967394                           | 27.98501683                                      |
| 0.016531355                                       | 0.054452851                                                | 0.08834273                            | 28.38755129                                      |
| 0.014463259                                       | 0.092262727                                                | 0.347005564                           | 276.7762321                                      |
| 0.007131017                                       | 0.048312169                                                | 0.164041367                           | 53.37562164                                      |
| 0.010713477                                       | 0.050850507                                                | 0.142218763                           | 117.9831437                                      |
| 0.007863458                                       | 0.050142843                                                | 0.108191821                           | 92.92531023                                      |
| 0.014442774                                       | 0.065248358                                                | 0.155519576                           | 131.5934348                                      |
| 0.020392111                                       | 0.087888957                                                | 0.15976782                            | 11.35415217                                      |
| 0.014038938                                       | 0.061175853                                                | 0.106706045                           | 90.8104532                                       |
| 0.012819422                                       | 0.054645581                                                | 0.144754397                           | 198.4919423                                      |
| 0.008807664                                       | 0.050289199                                                | 0.079852916                           | 37.15099866                                      |
| 0.009037346                                       | 0.054494841                                                | 0.143266526                           | 114.988707                                       |
| 0.008566695                                       | 0.061498915                                                | 0.186894263                           | 132.5645921                                      |
| 0.010756735                                       | 0.059725475                                                | 0.16406893                            | 274.1480098                                      |
| 0.010915633                                       | 0.050191087                                                | 0.117228922                           | 89.50079484                                      |
| 0.006272565                                       | 0.049251916                                                | 0.078580266                           | 69.7892499                                       |
| 0.007937152                                       | 0.059756848                                                | 0.396815957                           | 292.2337824                                      |
| 0.017803965                                       | 0.068970286                                                | 0.107712766                           | 35.46308206                                      |
| 0.004015536                                       | 0.071963381                                                | 0.285034213                           | 578.6301411                                      |
| 0.01236671                                        | 0.048638612                                                | 0.094797495                           | 60.43008478                                      |
| 0.007758983                                       | 0.104535147                                                | 0.408721427                           | 480.8404139                                      |
| 0.007503792                                       | 0.044334035                                                | 0.111878677                           | 99.81639573                                      |
| 0.014845684                                       | 0.049223808                                                | 0.086930056                           | 65.24487484                                      |
| 0.01284708                                        | 0.077858671                                                | 0.276484267                           | 103.9089487                                      |
| 0.00981404                                        | 0.050778793                                                | 0.114700824                           | 112.5164057                                      |
| 0.007444703                                       | 0.066129331                                                | 0.191027044                           | 313.7099235                                      |
| 0.031734795                                       | 0.074359737                                                | 0.100246509                           | 33.5630204                                       |
| 0.031492775                                       | 0.056318702                                                | 0.095560106                           | 20.42828151                                      |
| 0.011475077                                       | 0.05516159                                                 | 0.077158188                           | 23.39293282                                      |
| 0.012918546                                       | 0.051388399                                                | 0.099913793                           | 61.2554004                                       |
| 0.006483099                                       | 0.051851043                                                | 0.102316358                           | 133.1830089                                      |
| 0.012425773                                       | 0.098801971                                                | 0.626502871                           | 604.9622627                                      |
| 0.007419772                                       | 0.070783256                                                | 0.182904105                           | 102.3785642                                      |
| 0.016510339                                       | 0.040623904                                                | 0.062673159                           | 24.76824141                                      |
| 0.0144484                                         | 0.047859965                                                | 0.088648366                           | 52.57310175                                      |
| 0.011263355                                       | 0.060125947                                                | 0.20328253                            | 214.2783815                                      |
| 0.009533268                                       | 0.051852138                                                | 0.104995266                           | 99.17340222                                      |
| 0.009128198                                       | 0.056881042                                                | 0.100079248                           | 40.08715556                                      |
| 0.008820241                                       | 0.076211358                                                | 0.703630891                           | 654.829551                                       |
| 0.010978816                                       | 0.05841226                                                 | 0.109410327                           | 71.34682655                                      |
| 0.005432185                                       | 0.045818716                                                | 0.117163408                           | 104.2614386                                      |
| 0.003957818                                       | 0.05081572                                                 | 0.164657542                           | 375.6551397                                      |
| 0.008636164                                       | 0.051575023                                                | 0.124597054                           | 98.64177017                                      |
| 0.020606665                                       | 0.060293345                                                | 0.104329134                           | 37.68038738                                      |
| 0.005072788                                       | 0.050263046                                                | 0.105629745                           | 158.5146024                                      |
| 0.012529135                                       | 0.056006945                                                | 0.059987844                           | 21.5299216                                       |
| 0.0071538                                         | 0.057057243                                                | 0.136255524                           | 262.917294                                       |
| 0.009019102                                       | 0.068087965                                                | 0.222071326                           | 447.789769                                       |
| 0.007532607                                       | 0.055714967                                                | 0.115229799                           | 108.7897447                                      |
| 0.022541695                                       | 0.053148653                                                | 0.086088097                           | 24.42858944                                      |
| 0.011150743                                       | 0.057976727                                                | 0.182978956                           | 258.4411852                                      |
| 0.018312256                                       | 0.046673246                                                | 0.083425954                           | 58.35633528                                      |
| 0.019794803                                       | 0.061839468                                                | 0.100659779                           | 54.53115559                                      |
| 0.009358622                                       | 0.068139101                                                | 0.260970676                           | 238.258568                                       |
| 0.034934922                                       | 0.071365397                                                | 0.151361507                           | 59.58078037                                      |
| 0.009155132                                       | 0.054717134                                                | 0.136818115                           | 109.9679281                                      |
| 0.008208151                                       | 0.052621859                                                | 0.051720244                           | 16.17602905                                      |
| 0.009550059                                       | 0.054757161                                                | 0.103765839                           | 66.34363331                                      |
| 0.011097395                                       | 0.072052065                                                | 0.177876138                           | 114.7736422                                      |
| 0.009203168                                       | 0.045200103                                                | 0.094545896                           | 59.15489484                                      |
| 0.009015144                                       | 0.055792622                                                | 0.100864289                           | 42.71144511                                      |
| 0.020810511                                       | 0.056671874                                                | 0.166725054                           | 117.375698                                       |
| 0.012731996                                       | 0.068331903                                                | 0.15559111                            | 115.7793173                                      |
| 0.011723398                                       | 0.061862823                                                | 0.226910738                           | 148.1077819                                      |
| 0.005527641                                       | 0.06409355                                                 | 0.081476964                           | 31.78952535                                      |
| 0.012238086                                       | 0.057096576                                                | 0.115963303                           | 68.49634647                                      |
| 0.012598155                                       | 0.068456176                                                | 0.385038292                           | 218.6670358                                      |
| 0.011375604                                       | 0.067068971                                                | 0.159468697                           | 102.3950064                                      |
| 0.020798046                                       | 0.049145786                                                | 0.102861063                           | 62.27434319                                      |
| 0.00551314                                        | 0.050694079                                                | 0.104684289                           | 37.48843987                                      |
| 0.008083231                                       | 0.069390476                                                | 0.228091747                           | 153.6549906                                      |
| 0.006818182                                       | 0.066130341                                                | 0.161005045                           | 265.97566                                        |
| 0.011510074                                       | 0.058503322                                                | 0.140551473                           | 183.1911095                                      |
| 0.010403218                                       | 0.072625053                                                | 0.178770637                           | 211.8480153                                      |
| 0.009642986                                       | 0.04170061                                                 | 0.081630756                           | 93.07438382                                      |
| 0.017053424                                       | 0.051305804                                                | 0.118217526                           | 115.4061422                                      |
| 0.011720518                                       | 0.059899121                                                | 0.085951348                           | 17.49113963                                      |
| 0.017938042                                       | 0.076104798                                                | 0.097285542                           | 18.9017734                                       |
| 0.004823377                                       | 0.054132249                                                | 0.157095105                           | 430.0135524                                      |

|                                           |                                                         |                                                  |                                            |
|-------------------------------------------|---------------------------------------------------------|--------------------------------------------------|--------------------------------------------|
| log.sigma.5.0.mm.3D_glrIm_LongRunEmphasis | log.sigma.5.0.mm.3D_glrIm_ShortRunHighGrayLevelEmphasis | log.sigma.5.0.mm.3D_glrIm_RunLengthNonUniformity | log.sigma.5.0.mm.3D_glrIm_ShortRunEmphasis |
| 1.249866753                               | 292.1271458                                             | 1181.506851                                      | 0.950117128                                |
| 1.186608169                               | 364.0417217                                             | 294.9378483                                      | 0.958470402                                |
| 1.256286059                               | 339.5552296                                             | 742.4429028                                      | 0.953702128                                |
| 1.159760706                               | 329.7084448                                             | 279.0385465                                      | 0.96354179                                 |
| 1.254105072                               | 193.8310425                                             | 1148.893984                                      | 0.948808334                                |
| 1.200073964                               | 285.7620532                                             | 204.3496149                                      | 0.957141758                                |
| 2.035288329                               | 126.2143157                                             | 6320.061872                                      | 0.879993324                                |
| 1.422150033                               | 243.6486445                                             | 4496.479418                                      | 0.926461082                                |
| 1.558459709                               | 152.472453                                              | 2970.142805                                      | 0.911526286                                |
| 1.302096605                               | 180.666756                                              | 598.1116359                                      | 0.941875719                                |
| 1.563830107                               | 89.55289294                                             | 1062.108716                                      | 0.904095033                                |
| 1.624434609                               | 140.0352607                                             | 2265.354262                                      | 0.89975754                                 |
| 1.224145411                               | 317.0896868                                             | 674.8285999                                      | 0.953797725                                |
| 1.165660801                               | 324.381957                                              | 554.7047123                                      | 0.96248196                                 |
| 1.328590313                               | 155.9728103                                             | 1223.294398                                      | 0.937059491                                |
| 1.657561759                               | 170.5824046                                             | 3956.018961                                      | 0.908440903                                |
| 1.410518117                               | 94.34365824                                             | 640.0566078                                      | 0.920034211                                |
| 1.160910367                               | 322.3897417                                             | 354.0390619                                      | 0.963539551                                |
| 1.57604151                                | 89.55263182                                             | 738.298519                                       | 0.902103651                                |
| 1.419473139                               | 670.4295407                                             | 6791.607305                                      | 0.925891159                                |
| 1.279442939                               | 195.8923225                                             | 1675.259546                                      | 0.94689764                                 |
| 1.259633722                               | 267.2038872                                             | 396.9908439                                      | 0.942902239                                |
| 1.237462834                               | 214.5897266                                             | 461.1009019                                      | 0.95212102                                 |
| 1.804345799                               | 117.4720789                                             | 2229.34223                                       | 0.883469648                                |
| 1.410356458                               | 310.7742123                                             | 924.2296153                                      | 0.929099342                                |
| 1.361571072                               | 233.5522167                                             | 1963.749822                                      | 0.934745429                                |
| 1.282082811                               | 275.0612831                                             | 1614.106075                                      | 0.945968313                                |
| 1.40929338                                | 144.3393442                                             | 1657.382448                                      | 0.923580751                                |
| 1.453544716                               | 114.2782614                                             | 103.1463563                                      | 0.909907225                                |
| 1.285562627                               | 170.0844871                                             | 1283.371879                                      | 0.943646713                                |
| 1.366740341                               | 183.0782831                                             | 3065.742101                                      | 0.933761783                                |
| 1.219864949                               | 299.7948851                                             | 656.3816092                                      | 0.954243931                                |
| 1.372784661                               | 225.7648582                                             | 1767.697767                                      | 0.930837623                                |
| 1.449927021                               | 192.9810408                                             | 1785.489228                                      | 0.925739199                                |
| 1.418863059                               | 181.4718932                                             | 3782.341362                                      | 0.924808222                                |
| 1.302703709                               | 276.3951296                                             | 1540.297754                                      | 0.94295324                                 |
| 1.220509581                               | 373.1031248                                             | 1256.78435                                       | 0.953299451                                |
| 1.824556522                               | 228.5445038                                             | 3769.386022                                      | 0.897870701                                |
| 1.300049373                               | 164.2045255                                             | 439.5149059                                      | 0.938494177                                |
| 1.677492872                               | 304.2638096                                             | 6157.577238                                      | 0.895277095                                |
| 1.260362785                               | 217.697626                                              | 1080.696537                                      | 0.946211025                                |
| 1.949951689                               | 156.177358                                              | 3266.323463                                      | 0.865706698                                |
| 1.274128058                               | 317.1504063                                             | 2003.197018                                      | 0.952710445                                |
| 1.236152869                               | 203.7632332                                             | 1169.333743                                      | 0.951595642                                |
| 1.655267209                               | 153.2078225                                             | 1032.091595                                      | 0.89894927                                 |
| 1.292474463                               | 226.7118797                                             | 1926.716184                                      | 0.945457626                                |
| 1.467514373                               | 203.362779                                              | 3877.151932                                      | 0.921320747                                |
| 1.28835737                                | 117.5009128                                             | 385.0823029                                      | 0.938308276                                |
| 1.261385673                               | 163.7447566                                             | 316.4793529                                      | 0.94697661                                 |
| 1.215387178                               | 243.6910793                                             | 376.498832                                       | 0.954114633                                |
| 1.268846271                               | 193.2239398                                             | 1038.014187                                      | 0.946255498                                |
| 1.279901537                               | 301.2139004                                             | 2215.25863                                       | 0.94296604                                 |
| 2.358204237                               | 116.4619605                                             | 4083.655334                                      | 0.841207665                                |
| 1.480113907                               | 207.6463279                                             | 1158.611193                                      | 0.912931249                                |
| 1.176965339                               | 375.7813776                                             | 551.6596249                                      | 0.961523003                                |
| 1.236513492                               | 202.5883766                                             | 972.0219503                                      | 0.952620965                                |
| 1.483832097                               | 176.3951007                                             | 2929.647445                                      | 0.922328452                                |
| 1.276230754                               | 221.4903866                                             | 1665.89943                                       | 0.946408997                                |
| 1.275020516                               | 252.3671116                                             | 609.4246994                                      | 0.943712833                                |
| 2.336692123                               | 174.2541982                                             | 6134.068452                                      | 0.867476563                                |
| 1.296692241                               | 199.0822289                                             | 1048.035668                                      | 0.94056014                                 |
| 1.294038528                               | 349.123179                                              | 1978.288639                                      | 0.94563474                                 |
| 1.409948086                               | 369.5243193                                             | 6145.00125                                       | 0.927931255                                |
| 1.328489858                               | 279.4946249                                             | 1624.358607                                      | 0.936843872                                |
| 1.280455092                               | 146.0189624                                             | 541.6573988                                      | 0.944474499                                |
| 1.284352999                               | 339.0829536                                             | 2721.038171                                      | 0.943094168                                |
| 1.177661944                               | 286.6415012                                             | 345.9908139                                      | 0.95938609                                 |
| 1.357358823                               | 245.5249705                                             | 3866.379095                                      | 0.932071922                                |
| 1.534706129                               | 172.7604164                                             | 5268.990084                                      | 0.913000354                                |
| 1.302057723                               | 241.2540754                                             | 1682.289793                                      | 0.942118562                                |
| 1.238435257                               | 169.1557968                                             | 406.29506                                        | 0.951180282                                |
| 1.43707447                                | 210.502628                                              | 3698.736041                                      | 0.927257183                                |
| 1.22481711                                | 205.9073354                                             | 1110.480318                                      | 0.954191061                                |
| 1.264841797                               | 132.2154                                                | 773.0573804                                      | 0.948580945                                |
| 1.637737498                               | 197.838369                                              | 2697.272651                                      | 0.898022854                                |
| 1.373508808                               | 95.45815539                                             | 711.9055636                                      | 0.935929978                                |
| 1.347720141                               | 241.0509543                                             | 1705.747511                                      | 0.936435972                                |
| 1.156794926                               | 463.5009319                                             | 278.8095979                                      | 0.962771961                                |
| 1.286930597                               | 238.6876906                                             | 1042.750471                                      | 0.941399461                                |
| 1.46075838                                | 156.4566481                                             | 1287.590722                                      | 0.91700912                                 |
| 1.250934574                               | 287.9464404                                             | 1150.423877                                      | 0.950136347                                |
| 1.269982812                               | 266.6852247                                             | 667.5360457                                      | 0.946400101                                |
| 1.394950655                               | 155.120175                                              | 1770.062083                                      | 0.936784408                                |
| 1.407645697                               | 152.4870836                                             | 1394.494759                                      | 0.924336122                                |
| 1.522841817                               | 185.7672876                                             | 1944.419073                                      | 0.918616692                                |
| 1.23075383                                | 483.2511137                                             | 436.2274786                                      | 0.950660462                                |
| 1.309583472                               | 194.2006387                                             | 1027.798961                                      | 0.939733487                                |
| 1.84271772                                | 162.3974079                                             | 2394.968994                                      | 0.887585648                                |
| 1.407250248                               | 166.1098439                                             | 1264.540161                                      | 0.926636707                                |
| 1.269352096                               | 202.662019                                              | 1106.553372                                      | 0.947642622                                |
| 1.28940083                                | 415.7163252                                             | 634.6775936                                      | 0.940827394                                |
| 1.547796839                               | 213.6942532                                             | 1776.636612                                      | 0.912765755                                |
| 1.417651287                               | 221.0021327                                             | 3302.009872                                      | 0.923321142                                |
| 1.355760883                               | 186.0803825                                             | 2651.967992                                      | 0.935366708                                |
| 1.468601188                               | 150.310232                                              | 2335.623056                                      | 0.913467553                                |
| 1.224653563                               | 300.9113301                                             | 1978.347679                                      | 0.953347979                                |
| 1.310793197                               | 176.4199055                                             | 1930.776032                                      | 0.940341272                                |
| 1.238370533                               | 248.6185282                                             | 256.526299                                       | 0.94999371                                 |
| 1.266347914                               | 160.5349489                                             | 215.7145727                                      | 0.94511403                                 |
| 1.395285777                               | 307.3608324                                             | 6625.138491                                      | 0.92944342                                 |

| log.sigma.5.0.mm.3D_glrIm_LongRunHighGrayLevelEmphasis | log.sigma.5.0.mm.3D_glrIm_RunPercentage | log.sigma.5.0.mm.3D_glrIm_LongRunLowGrayLevelEmphasis | log.sigma.5.0.mm.3D_glrIm_RunEntropy |
|--------------------------------------------------------|-----------------------------------------|-------------------------------------------------------|--------------------------------------|
| 371.8447521                                            | 0.930907735                             | 0.010027141                                           | 4.982211119                          |
| 451.3767511                                            | 0.945466637                             | 0.011065947                                           | 4.84023024                           |
| 441.9031504                                            | 0.934028976                             | 0.008179102                                           | 4.898296893                          |
| 392.007523                                             | 0.9519828                               | 0.016867382                                           | 4.853281752                          |
| 255.4674552                                            | 0.929400861                             | 0.02637784                                            | 4.834024705                          |
| 353.584532                                             | 0.942466624                             | 0.016501146                                           | 4.794026055                          |
| 270.9921879                                            | 0.813279613                             | 0.028244297                                           | 4.836099849                          |
| 354.5119578                                            | 0.894997718                             | 0.009853495                                           | 4.912738504                          |
| 233.9279476                                            | 0.871728694                             | 0.020962551                                           | 4.789153867                          |
| 239.9102069                                            | 0.919103413                             | 0.017618427                                           | 4.687189905                          |
| 144.3206292                                            | 0.868153055                             | 0.029912365                                           | 4.314294853                          |
| 231.5210212                                            | 0.858165316                             | 0.024998863                                           | 4.737172273                          |
| 415.2200926                                            | 0.936640425                             | 0.012165392                                           | 4.9195436                            |
| 385.0300658                                            | 0.950071667                             | 0.020372506                                           | 4.930159293                          |
| 201.202122                                             | 0.912625153                             | 0.024330409                                           | 4.763798502                          |
| 290.3303056                                            | 0.861626572                             | 0.020752953                                           | 4.911766869                          |
| 136.874503                                             | 0.891715306                             | 0.035555339                                           | 4.37215436                           |
| 387.9786146                                            | 0.951664472                             | 0.018888544                                           | 4.933002452                          |
| 144.1962038                                            | 0.864224441                             | 0.044005509                                           | 4.395567459                          |
| 1014.648666                                            | 0.894855879                             | 0.002381337                                           | 4.858203112                          |
| 265.4841509                                            | 0.924742726                             | 0.022494355                                           | 4.779459549                          |
| 355.7592094                                            | 0.9257134                               | 0.014105247                                           | 4.632996867                          |
| 274.9134594                                            | 0.934243176                             | 0.019942607                                           | 4.704001869                          |
| 223.5669523                                            | 0.832531383                             | 0.024397086                                           | 4.522576872                          |
| 456.9526917                                            | 0.899210724                             | 0.009242103                                           | 5.006540759                          |
| 319.3367635                                            | 0.907698327                             | 0.014355539                                           | 4.945072518                          |
| 352.7103511                                            | 0.924612314                             | 0.009997137                                           | 4.875195917                          |
| 209.122311                                             | 0.895045922                             | 0.02018858                                            | 4.62093821                           |
| 177.9227201                                            | 0.884088514                             | 0.02533979                                            | 4.155639094                          |
| 223.1390819                                            | 0.921978022                             | 0.018114276                                           | 4.629726164                          |
| 250.7191577                                            | 0.906057524                             | 0.017762062                                           | 4.8292220547                         |
| 381.2108836                                            | 0.937524405                             | 0.010278197                                           | 4.760079114                          |
| 313.0311653                                            | 0.903607313                             | 0.012437358                                           | 4.895975666                          |
| 294.6441761                                            | 0.892371397                             | 0.012136827                                           | 4.69792087                           |
| 255.1206868                                            | 0.89406405                              | 0.015432282                                           | 4.793153427                          |
| 376.8039411                                            | 0.919665172                             | 0.013904783                                           | 4.870838462                          |
| 474.0406527                                            | 0.937067562                             | 0.007498353                                           | 4.879692907                          |
| 442.9974495                                            | 0.839202886                             | 0.012922865                                           | 5.016912045                          |
| 229.3610399                                            | 0.917994505                             | 0.022537032                                           | 4.431214                             |
| 548.3373542                                            | 0.850746269                             | 0.006545418                                           | 4.786106483                          |
| 278.424381                                             | 0.927210103                             | 0.016127347                                           | 4.863374225                          |
| 328.0617116                                            | 0.809821525                             | 0.014610485                                           | 4.443886223                          |
| 410.1866352                                            | 0.931189158                             | 0.009589174                                           | 5.006599184                          |
| 254.8742308                                            | 0.93347779                              | 0.019151265                                           | 4.836630316                          |
| 265.6416238                                            | 0.85633775                              | 0.019344884                                           | 4.65737815                           |
| 294.9553908                                            | 0.92282062                              | 0.012887428                                           | 4.836159134                          |
| 308.12649                                              | 0.886548884                             | 0.010942105                                           | 4.670118628                          |
| 158.9401792                                            | 0.919160269                             | 0.041369768                                           | 4.34342196                           |
| 211.2178539                                            | 0.92760181                              | 0.042166355                                           | 4.704326747                          |
| 310.7594478                                            | 0.938223281                             | 0.013248964                                           | 4.630136254                          |
| 237.2370752                                            | 0.926065388                             | 0.017434081                                           | 4.806511438                          |
| 398.255869                                             | 0.922248308                             | 0.007932291                                           | 4.86831755                           |
| 310.1127507                                            | 0.765623794                             | 0.025402661                                           | 4.678322994                          |
| 321.5051106                                            | 0.880727068                             | 0.010498752                                           | 4.628614533                          |
| 459.8976679                                            | 0.948079914                             | 0.019742769                                           | 5.023005296                          |
| 259.2996835                                            | 0.934131345                             | 0.018094276                                           | 4.822576485                          |
| 266.7712685                                            | 0.887441326                             | 0.01677183                                            | 4.791320888                          |
| 288.824188                                             | 0.925347028                             | 0.012297468                                           | 4.744395714                          |
| 332.7721237                                            | 0.923681823                             | 0.011123665                                           | 4.679913609                          |
| 453.1575294                                            | 0.787358148                             | 0.017467196                                           | 4.854221009                          |
| 262.5765344                                            | 0.919025294                             | 0.013750979                                           | 4.717623589                          |
| 472.037925                                             | 0.923014511                             | 0.006723876                                           | 5.016316373                          |
| 535.0825208                                            | 0.897694363                             | 0.005549445                                           | 5.004321024                          |
| 390.6146828                                            | 0.91243394                              | 0.011157545                                           | 4.947263724                          |
| 190.2141133                                            | 0.923190547                             | 0.025714354                                           | 4.543233226                          |
| 456.3037839                                            | 0.921817732                             | 0.006355746                                           | 4.925421837                          |
| 351.2104291                                            | 0.946760136                             | 0.014126558                                           | 4.632102103                          |
| 336.2062673                                            | 0.906103926                             | 0.00977645                                            | 4.838101755                          |
| 281.6372735                                            | 0.875845252                             | 0.013791605                                           | 4.68393234                           |
| 338.2642165                                            | 0.91916558                              | 0.00933846                                            | 4.734119203                          |
| 215.2080397                                            | 0.934021263                             | 0.027723415                                           | 4.645655141                          |
| 311.6310903                                            | 0.894491375                             | 0.015487397                                           | 4.891045552                          |
| 256.569392                                             | 0.936617689                             | 0.023145716                                           | 4.854207859                          |
| 167.209604                                             | 0.928259109                             | 0.025599675                                           | 4.525106775                          |
| 334.0485118                                            | 0.85553379                              | 0.01457711                                            | 4.863163926                          |
| 137.1435469                                            | 0.909418468                             | 0.048791155                                           | 4.350694029                          |
| 343.6992893                                            | 0.909774698                             | 0.011922854                                           | 4.809901962                          |
| 560.5914359                                            | 0.951655156                             | 0.008755423                                           | 4.77137873                           |
| 322.7680582                                            | 0.921146534                             | 0.011488919                                           | 4.758104764                          |
| 240.1406175                                            | 0.88474359                              | 0.015716033                                           | 4.551260527                          |
| 366.5665533                                            | 0.930791115                             | 0.011128892                                           | 4.980605057                          |
| 368.1467492                                            | 0.926708884                             | 0.010514346                                           | 4.699024093                          |
| 219.4558765                                            | 0.907031619                             | 0.030453046                                           | 4.734744672                          |
| 218.7950239                                            | 0.894997765                             | 0.017609343                                           | 4.577718938                          |
| 286.8710443                                            | 0.881257969                             | 0.016964773                                           | 4.837460498                          |
| 637.5447403                                            | 0.933652035                             | 0.006099091                                           | 4.718191747                          |
| 263.6783744                                            | 0.917137144                             | 0.016098141                                           | 4.696141111                          |
| 299.49716                                              | 0.831234459                             | 0.02172276                                            | 4.898792277                          |
| 238.6753729                                            | 0.897164564                             | 0.015468208                                           | 4.609148958                          |
| 266.7555851                                            | 0.926790839                             | 0.025656843                                           | 4.873539558                          |
| 566.0041501                                            | 0.919728282                             | 0.006471214                                           | 4.890319258                          |
| 347.0311237                                            | 0.87413416                              | 0.01192159                                            | 4.713955134                          |
| 328.3429568                                            | 0.893545024                             | 0.009539672                                           | 4.649592487                          |
| 257.5252573                                            | 0.908545024                             | 0.015507467                                           | 4.760909733                          |
| 228.1850934                                            | 0.882184643                             | 0.015606024                                           | 4.504704957                          |
| 380.3504467                                            | 0.936209344                             | 0.011905738                                           | 5.070086226                          |
| 238.3693477                                            | 0.917367298                             | 0.022375702                                           | 4.825485902                          |
| 324.4934885                                            | 0.932661588                             | 0.013270252                                           | 4.561911064                          |
| 217.4989389                                            | 0.92652124                              | 0.021156253                                           | 4.256045554                          |
| 454.9804947                                            | 0.900106353                             | 0.006542332                                           | 4.892575653                          |

| log.sigma.5.0.mm.3D_glrIm_HighGrayLevelRunEmphasis | log.sigma.5.0.mm.3D_glrIm_RunLengthNonUniformityNormalized | log.sigma.5.0.mm.3D_glszm_GrayLevelVariance |
|----------------------------------------------------|------------------------------------------------------------|---------------------------------------------|
| 305.7155421                                        | 0.878166206                                                | 42.45948533                                 |
| 379.2653388                                        | 0.897490301                                                | 40.83382643                                 |
| 355.0623756                                        | 0.888380563                                                | 40.26817908                                 |
| 341.0819875                                        | 0.909213014                                                | 46.80276134                                 |
| 204.2151266                                        | 0.875261498                                                | 32.60289511                                 |
| 297.2603432                                        | 0.894553618                                                | 39.2176454                                  |
| 141.3136133                                        | 0.735058783                                                | 28.8871198                                  |
| 260.098655                                         | 0.826780927                                                | 35.43652484                                 |
| 163.6493715                                        | 0.796823941                                                | 29.44268703                                 |
| 190.2447064                                        | 0.860437905                                                | 29.65313286                                 |
| 97.69662574                                        | 0.782116933                                                | 15.80760044                                 |
| 152.7816083                                        | 0.772356357                                                | 26.14631671                                 |
| 333.5478443                                        | 0.88711634                                                 | 39.63230585                                 |
| 335.444514                                         | 0.90616571                                                 | 40.77272727                                 |
| 163.3714677                                        | 0.849625822                                                | 27.6824626                                  |
| 185.2886407                                        | 0.792635708                                                | 31.18923073                                 |
| 101.3677753                                        | 0.812142739                                                | 16.45782222                                 |
| 334.0280005                                        | 0.908857905                                                | 46.46642863                                 |
| 97.51658306                                        | 0.777680565                                                | 17.30293228                                 |
| 722.3326092                                        | 0.825402603                                                | 39.40886886                                 |
| 206.8867002                                        | 0.871169874                                                | 29.19011024                                 |
| 282.9782275                                        | 0.862537017                                                | 30.57638889                                 |
| 224.6187787                                        | 0.883150565                                                | 31.60097085                                 |
| 130.8224332                                        | 0.741291433                                                | 19.39295315                                 |
| 332.0049875                                        | 0.83403649                                                 | 40.83762168                                 |
| 246.8356434                                        | 0.844819731                                                | 35.17688783                                 |
| 287.282569                                         | 0.869556347                                                | 36.22510314                                 |
| 154.6023226                                        | 0.82029509                                                 | 21.75200099                                 |
| 124.9103352                                        | 0.794312011                                                | 19.64408163                                 |
| 178.9290481                                        | 0.863691739                                                | 26.73680421                                 |
| 193.5787389                                        | 0.842661512                                                | 27.32824647                                 |
| 313.4836006                                        | 0.887585348                                                | 31.96302794                                 |
| 239.6594163                                        | 0.836225392                                                | 34.06024623                                 |
| 207.1449346                                        | 0.826314933                                                | 22.58786843                                 |
| 192.9423908                                        | 0.823059878                                                | 30.26753864                                 |
| 292.20736                                          | 0.862633613                                                | 31.53439069                                 |
| 390.360544                                         | 0.885692107                                                | 39.8650984                                  |
| 251.7217314                                        | 0.770066302                                                | 33.55667551                                 |
| 175.0058232                                        | 0.852806678                                                | 21.120891                                   |
| 336.8321756                                        | 0.763654803                                                | 30.67917775                                 |
| 228.1079826                                        | 0.868966907                                                | 32.3354525                                  |
| 177.5811743                                        | 0.707915232                                                | 19.91826713                                 |
| 330.7475938                                        | 0.886636203                                                | 40.61481999                                 |
| 212.3836186                                        | 0.881466425                                                | 30.32596402                                 |
| 168.1552607                                        | 0.771352317                                                | 28.64641902                                 |
| 237.6332571                                        | 0.86833344                                                 | 29.14933103                                 |
| 218.5388483                                        | 0.816120573                                                | 23.62062832                                 |
| 124.6651179                                        | 0.851600943                                                | 19.5735627                                  |
| 171.6547281                                        | 0.871306044                                                | 33.86127732                                 |
| 255.1043973                                        | 0.88696366                                                 | 29.119375                                   |
| 200.6805227                                        | 0.869750109                                                | 30.85400357                                 |
| 317.7660607                                        | 0.86177419                                                 | 37.33026296                                 |
| 136.5318973                                        | 0.66512748                                                 | 23.20023038                                 |
| 225.4013679                                        | 0.798729865                                                | 26.24860451                                 |
| 390.4444715                                        | 0.904240706                                                | 50.90813302                                 |
| 211.9153461                                        | 0.884080128                                                | 30.91531718                                 |
| 188.7687163                                        | 0.81939568                                                 | 27.62196195                                 |
| 232.4183883                                        | 0.86996065                                                 | 28.34901882                                 |
| 266.1581328                                        | 0.863659881                                                | 29.1161511                                  |
| 198.7887279                                        | 0.712410665                                                | 26.77791303                                 |
| 209.7695257                                        | 0.856837007                                                | 30.9779045                                  |
| 368.5969446                                        | 0.868455898                                                | 43.37974225                                 |
| 394.6970974                                        | 0.829959764                                                | 37.76129769                                 |
| 297.5892878                                        | 0.848500613                                                | 38.68803538                                 |
| 153.2047543                                        | 0.865652882                                                | 24.94247701                                 |
| 358.5830396                                        | 0.862140163                                                | 38.22110113                                 |
| 298.4197452                                        | 0.899167525                                                | 33.91280277                                 |
| 260.3156076                                        | 0.838142906                                                | 33.03355126                                 |
| 188.0429206                                        | 0.799047911                                                | 23.51853603                                 |
| 256.667716                                         | 0.860568047                                                | 29.64080503                                 |
| 176.9301542                                        | 0.881776003                                                | 28.66012397                                 |
| 224.7370417                                        | 0.82883644                                                 | 35.1687155                                  |
| 214.4544456                                        | 0.887471121                                                | 34.93431489                                 |
| 138.1375979                                        | 0.875330482                                                | 22.68064285                                 |
| 216.5493892                                        | 0.769329362                                                | 32.2031317                                  |
| 101.6726999                                        | 0.84895745                                                 | 16.38171488                                 |
| 256.9694576                                        | 0.847960499                                                | 32.71542313                                 |
| 481.8982567                                        | 0.906571971                                                | 50.33916205                                 |
| 253.0863803                                        | 0.859065604                                                | 31.51737999                                 |
| 169.1309338                                        | 0.80689958                                                 | 23.03346395                                 |
| 301.2578262                                        | 0.878260702                                                | 42.21014178                                 |
| 283.0276882                                        | 0.870362155                                                | 29.22692972                                 |
| 163.8954311                                        | 0.851561947                                                | 25.72531678                                 |
| 162.7776403                                        | 0.821914189                                                | 21.6790426                                  |
| 199.5071286                                        | 0.810698895                                                | 32.43531637                                 |
| 509.879844                                         | 0.879101636                                                | 49.41668371                                 |
| 205.4236247                                        | 0.85526846                                                 | 24.92190222                                 |
| 178.6697667                                        | 0.749163914                                                | 29.64518667                                 |
| 177.3596421                                        | 0.827085998                                                | 23.78780261                                 |
| 213.1088758                                        | 0.872652653                                                | 36.69897315                                 |
| 441.1668293                                        | 0.857280895                                                | 43.92873024                                 |
| 231.9104579                                        | 0.799640846                                                | 29.32694147                                 |
| 237.7909077                                        | 0.819739844                                                | 24.02997919                                 |
| 197.3525185                                        | 0.845846937                                                | 31.50455833                                 |
| 162.6703033                                        | 0.799027109                                                | 17.56641777                                 |
| 314.491769                                         | 0.885533877                                                | 46.59823329                                 |
| 186.4893059                                        | 0.856836712                                                | 31.02586735                                 |
| 261.3037877                                        | 0.877693052                                                | 30.7792562                                  |
| 169.7919403                                        | 0.867084396                                                | 21.63693878                                 |
| 329.9295911                                        | 0.832960384                                                | 33.3774238                                  |

| log.sigma.5.0.mm.3D_glszm_SmallAreaHighGrayLevelEmphasis | log.sigma.5.0.mm.3D_glszm_GrayLevelNonUniformityNormalized | log.sigma.5.0.mm.3D_glszm_SizeZoneNonUniformityNormalized |
|----------------------------------------------------------|------------------------------------------------------------|-----------------------------------------------------------|
| 206.5862079                                              | 0.042685407                                                | 0.325001052                                               |
| 235.1568494                                              | 0.047419461                                                | 0.342619987                                               |
| 226.3440623                                              | 0.044469118                                                | 0.312921073                                               |
| 218.9497755                                              | 0.042735043                                                | 0.338346483                                               |
| 107.5672118                                              | 0.048156262                                                | 0.241211277                                               |
| 170.2860542                                              | 0.046469978                                                | 0.295692337                                               |
| 108.1617664                                              | 0.05180658                                                 | 0.265582597                                               |
| 190.9430096                                              | 0.046906542                                                | 0.294508901                                               |
| 133.4939678                                              | 0.050938489                                                | 0.253196799                                               |
| 127.8777007                                              | 0.05174093                                                 | 0.264020778                                               |
| 59.64011855                                              | 0.070287415                                                | 0.185409977                                               |
| 113.1795868                                              | 0.054947391                                                | 0.261015832                                               |
| 187.4155927                                              | 0.044539177                                                | 0.320473747                                               |
| 241.4703583                                              | 0.044990724                                                | 0.380987519                                               |
| 143.206185                                               | 0.05380193                                                 | 0.328887521                                               |
| 125.412629                                               | 0.048923545                                                | 0.282784079                                               |
| 59.55414528                                              | 0.069422222                                                | 0.218133333                                               |
| 202.3700255                                              | 0.042336707                                                | 0.326639641                                               |
| 81.99535065                                              | 0.0695595                                                  | 0.258487837                                               |
| 399.2791166                                              | 0.044484496                                                | 0.260344712                                               |
| 119.2617532                                              | 0.051179965                                                | 0.265697555                                               |
| 157.018282                                               | 0.054634354                                                | 0.275226757                                               |
| 131.0994447                                              | 0.051693155                                                | 0.273448622                                               |
| 104.5658824                                              | 0.064160618                                                | 0.255077764                                               |
| 232.1872311                                              | 0.043847865                                                | 0.343418687                                               |
| 164.8027092                                              | 0.047018955                                                | 0.264427635                                               |
| 219.0764225                                              | 0.046690773                                                | 0.327936157                                               |
| 111.7598196                                              | 0.060322469                                                | 0.26417823                                                |
| 60.05097607                                              | 0.067755102                                                | 0.226122449                                               |
| 127.1144962                                              | 0.054455262                                                | 0.299290279                                               |
| 133.101269                                               | 0.053153785                                                | 0.270866912                                               |
| 170.0078835                                              | 0.051269681                                                | 0.291675804                                               |
| 163.9583971                                              | 0.049097929                                                | 0.277619301                                               |
| 131.9014419                                              | 0.0624                                                     | 0.248514178                                               |
| 148.083698                                               | 0.049989998                                                | 0.292764038                                               |
| 159.9731493                                              | 0.049804296                                                | 0.288049736                                               |
| 236.5287588                                              | 0.045857572                                                | 0.297294286                                               |
| 199.4020877                                              | 0.0479152                                                  | 0.346495346                                               |
| 80.4748606                                               | 0.064770761                                                | 0.180579585                                               |
| 225.7815383                                              | 0.051546079                                                | 0.260796889                                               |
| 140.6089357                                              | 0.049153125                                                | 0.264758885                                               |
| 131.9588444                                              | 0.067985817                                                | 0.251322692                                               |
| 219.8719526                                              | 0.043987001                                                | 0.326677352                                               |
| 149.5993436                                              | 0.051852889                                                | 0.317641771                                               |
| 130.1294568                                              | 0.055567738                                                | 0.286873383                                               |
| 169.8516816                                              | 0.050818557                                                | 0.327345143                                               |
| 142.2845134                                              | 0.057354615                                                | 0.261591507                                               |
| 73.18078459                                              | 0.065439364                                                | 0.255872441                                               |
| 136.699209                                               | 0.050988554                                                | 0.262617066                                               |
| 121.3546728                                              | 0.0528125                                                  | 0.240546875                                               |
| 161.6454077                                              | 0.050139071                                                | 0.328095931                                               |
| 203.0134153                                              | 0.045736242                                                | 0.290940559                                               |
| 103.3072438                                              | 0.059112341                                                | 0.219594553                                               |
| 155.137069                                               | 0.055687673                                                | 0.268645131                                               |
| 236.3969015                                              | 0.039831769                                                | 0.366740864                                               |
| 125.3383573                                              | 0.050324389                                                | 0.263298796                                               |
| 136.3722887                                              | 0.053778297                                                | 0.273070464                                               |
| 136.1731778                                              | 0.05152375                                                 | 0.239919239                                               |
| 154.2800304                                              | 0.054828475                                                | 0.266408884                                               |
| 137.5123355                                              | 0.054712604                                                | 0.263385972                                               |
| 143.7750342                                              | 0.050053979                                                | 0.308744637                                               |
| 191.9200031                                              | 0.042090069                                                | 0.283039755                                               |
| 254.8686753                                              | 0.04509936                                                 | 0.304342332                                               |
| 178.4833514                                              | 0.044614474                                                | 0.265332806                                               |
| 95.08024471                                              | 0.057696052                                                | 0.264683613                                               |
| 198.6522124                                              | 0.045694331                                                | 0.268754649                                               |
| 175.4599407                                              | 0.052802768                                                | 0.29716263                                                |
| 182.58574                                                | 0.049252611                                                | 0.270641603                                               |
| 113.9578393                                              | 0.058894278                                                | 0.226889759                                               |
| 116.6262182                                              | 0.050180072                                                | 0.23614434                                                |
| 120.4566071                                              | 0.054235537                                                | 0.280798037                                               |
| 161.0257504                                              | 0.047128669                                                | 0.292228258                                               |
| 131.5449899                                              | 0.0459961                                                  | 0.276563223                                               |
| 104.147476                                               | 0.058470398                                                | 0.320091084                                               |
| 176.8321879                                              | 0.051634324                                                | 0.271358098                                               |
| 58.30486344                                              | 0.06838843                                                 | 0.210578512                                               |
| 131.7359633                                              | 0.048376449                                                | 0.24953543                                                |
| 249.9526082                                              | 0.045100416                                                | 0.325831025                                               |
| 145.513677                                               | 0.049408642                                                | 0.27634054                                                |
| 105.719418                                               | 0.059949511                                                | 0.226172768                                               |
| 205.4954023                                              | 0.043127996                                                | 0.327913098                                               |
| 127.1167704                                              | 0.052461573                                                | 0.272193139                                               |
| 123.5442972                                              | 0.054171244                                                | 0.299409949                                               |
| 115.7722915                                              | 0.06272122                                                 | 0.256911958                                               |
| 142.3534453                                              | 0.049178599                                                | 0.266372146                                               |
| 230.258219                                               | 0.044090577                                                | 0.272169467                                               |
| 135.359301                                               | 0.056740991                                                | 0.305775107                                               |
| 151.1217055                                              | 0.050962987                                                | 0.30128505                                                |
| 123.1935607                                              | 0.057627812                                                | 0.302437002                                               |
| 125.994841                                               | 0.045682182                                                | 0.254744971                                               |
| 242.5958388                                              | 0.04359714                                                 | 0.30394808                                                |
| 180.5375312                                              | 0.052515197                                                | 0.277124172                                               |
| 151.0098248                                              | 0.057747716                                                | 0.261995606                                               |
| 124.4181979                                              | 0.049459775                                                | 0.224903384                                               |
| 98.89704906                                              | 0.067183573                                                | 0.236023597                                               |
| 202.4959223                                              | 0.040138357                                                | 0.325729362                                               |
| 117.6070439                                              | 0.049134694                                                | 0.272253061                                               |
| 150.4407074                                              | 0.054710744                                                | 0.285950413                                               |
| 60.43181139                                              | 0.064897959                                                | 0.18                                                      |
| 183.0066981                                              | 0.047596938                                                | 0.278736508                                               |

| log.sigma.5.0.mm.3D_glszm_SizeZoneNonUniformity | log.sigma.5.0.mm.3D_glszm_GrayLevelNonUniformity | log.sigma.5.0.mm.3D_glszm_LargeAreaEmphasis | log.sigma.5.0.mm.3D_glszm_ZoneVariance |
|-------------------------------------------------|--------------------------------------------------|---------------------------------------------|----------------------------------------|
| 173.5505618                                     | 22.79400749                                      | 23.94007491                                 | 16.62781074                            |
| 53.44871795                                     | 7.397435897                                      | 8.83974359                                  | 3.891970743                            |
| 102.0122699                                     | 14.49693252                                      | 17.33742331                                 | 9.850653017                            |
| 52.78205128                                     | 6.666666667                                      | 6.782051282                                 | 2.521531887                            |
| 106.6153846                                     | 21.28506787                                      | 23.63574661                                 | 13.4449182                             |
| 30.45631068                                     | 4.786407767                                      | 8.815533981                                 | 3.295315298                            |
| 447.2410926                                     | 87.24228029                                      | 1993.157363                                 | 1953.990875                            |
| 494.1859356                                     | 78.70917759                                      | 93.21454112                                 | 80.13756799                            |
| 238.7645811                                     | 48.0349947                                       | 210.5153765                                 | 190.0884274                            |
| 58.61261261                                     | 11.48648649                                      | 30.74324324                                 | 19.17711631                            |
| 41.90265487                                     | 15.88495575                                      | 222.3274336                                 | 174.9248179                            |
| 177.2297496                                     | 37.30927835                                      | 404.5346097                                 | 379.3575669                            |
| 103.1925466                                     | 14.34161491                                      | 15.3136646                                  | 8.970149686                            |
| 117.3441558                                     | 13.85714286                                      | 8.175324675                                 | 3.803423849                            |
| 168.7192982                                     | 27.60038986                                      | 46.28654971                                 | 36.86057248                            |
| 390.242029                                      | 67.51449275                                      | 388.126087                                  | 370.6924365                            |
| 32.72                                           | 10.41333333                                      | 156.82                                      | 122.1671556                            |
| 63.04145078                                     | 8.170984456                                      | 7.559585492                                 | 3.068699831                            |
| 50.40512821                                     | 13.56410256                                      | 232.0205128                                 | 200.5455358                            |
| 550.1083767                                     | 93.99574065                                      | 309.5575012                                 | 290.6701883                            |
| 158.6214405                                     | 30.55443886                                      | 40.05360134                                 | 27.93807115                            |
| 46.23809524                                     | 9.178571429                                      | 18.85714286                                 | 10.14058957                            |
| 56.60386473                                     | 10.70048309                                      | 15.98067633                                 | 8.714135686                            |
| 131.3650485                                     | 33.04271845                                      | 979.5203883                                 | 930.7376228                            |
| 130.8425197                                     | 16.70603675                                      | 47.51706037                                 | 37.12870537                            |
| 197.5274431                                     | 35.1231593                                       | 59.41633199                                 | 47.7083918                             |
| 230.5391181                                     | 32.82361309                                      | 36.97581792                                 | 28.84966886                            |
| 132.3532934                                     | 30.22155689                                      | 105.259481                                  | 85.03641818                            |
| 7.914285714                                     | 2.371428571                                      | 36.34285714                                 | 18.94204082                            |
| 138.8706897                                     | 25.26724138                                      | 45.70689655                                 | 33.66719307                            |
| 289.0149953                                     | 56.71508903                                      | 92.12277413                                 | 78.00574621                            |
| 88.08609272                                     | 15.48344371                                      | 14.0794702                                  | 7.271172317                            |
| 175.7330174                                     | 31.07898894                                      | 102.6619273                                 | 89.0548031                             |
| 142.8956522                                     | 35.88                                            | 107.5113043                                 | 89.87130435                            |
| 390.5472264                                     | 66.68665667                                      | 125.464018                                  | 110.6582524                            |
| 188.0964778                                     | 32.52220521                                      | 32.60796325                                 | 23.79079241                            |
| 173.619863                                      | 26.78082192                                      | 13.54452055                                 | 6.841386752                            |
| 510.3876443                                     | 70.57909029                                      | 570.7298031                                 | 555.1130874                            |
| 24.55882353                                     | 8.808823529                                      | 46.82352941                                 | 29.86851211                            |
| 413.1022727                                     | 81.6489899                                       | 690.2064394                                 | 654.6369627                            |
| 115.1701149                                     | 21.3816092                                       | 23.30574713                                 | 13.81651473                            |
| 150.2909699                                     | 40.65551839                                      | 2757.58194                                  | 2667.617666                            |
| 294.6629712                                     | 39.67627494                                      | 24.94900222                                 | 17.76279861                            |
| 165.4913628                                     | 27.01535509                                      | 22.0268714                                  | 14.59836944                            |
| 86.63576159                                     | 16.78145695                                      | 382.2516556                                 | 355.7052761                            |
| 275.2972652                                     | 42.73840666                                      | 31.24494649                                 | 23.09429491                            |
| 306.323655                                      | 67.16225448                                      | 188.9385141                                 | 168.0572824                            |
| 36.07801418                                     | 9.226950355                                      | 34.37588652                                 | 22.24968563                            |
| 32.56451613                                     | 6.322580645                                      | 28.41129032                                 | 18.46845734                            |
| 38.4875                                         | 8.45                                             | 15.2875                                     | 7.306875                               |
| 152.8927039                                     | 23.36480687                                      | 26.5472103                                  | 18.91965684                            |
| 251.6635838                                     | 39.56184971                                      | 37.64508671                                 | 27.27892011                            |
| 188.1925321                                     | 50.65927655                                      | 4755.376896                                 | 4668.758797                            |
| 93.48850575                                     | 19.37931034                                      | 181.1034483                                 | 158.8402365                            |
| 109.6555184                                     | 11.909699                                        | 8.598662207                                 | 3.974004765                            |
| 110.3221957                                     | 21.08591885                                      | 17.86634845                                 | 9.988881357                            |
| 264.8783505                                     | 52.16494845                                      | 119.8381443                                 | 102.7053725                            |
| 151.8688784                                     | 32.61453397                                      | 26.5892575                                  | 15.92640177                            |
| 65.53658537                                     | 13.48780488                                      | 27.13414634                                 | 17.5140624                             |
| 401.6636066                                     | 83.43672131                                      | 3146.257705                                 | 3095.235959                            |
| 131.2164706                                     | 21.27294118                                      | 35.55058824                                 | 25.77209135                            |
| 236.0551559                                     | 35.10311751                                      | 32.36330935                                 | 23.62752819                            |
| 694.5092025                                     | 102.9167397                                      | 176.4382121                                 | 163.4188278                            |
| 158.4036851                                     | 26.63484087                                      | 43.21273032                                 | 30.88639737                            |
| 56.90697674                                     | 12.40465116                                      | 26.81395349                                 | 16.898777772                           |
| 282.192381                                      | 47.97904762                                      | 32.76095238                                 | 22.1457678                             |
| 50.51764706                                     | 8.976470588                                      | 10.24705882                                 | 4.543391003                            |
| 357.7881997                                     | 65.11195159                                      | 119.6467474                                 | 104.8516099                            |
| 288.6037736                                     | 74.91352201                                      | 434.2389937                                 | 399.3993018                            |
| 140.5058824                                     | 29.85714286                                      | 38.83697479                                 | 26.09387473                            |
| 49.42045455                                     | 9.545454545                                      | 16.5                                        | 8.685433884                            |
| 394.5081481                                     | 63.6237037                                       | 176.7607407                                 | 163.1473739                            |
| 136.0691057                                     | 22.6300813                                       | 16.70528455                                 | 9.342665576                            |
| 104.3496933                                     | 19.06134969                                      | 24.36809816                                 | 15.87605856                            |
| 201.3477089                                     | 38.31266846                                      | 488.9514825                                 | 458.6569917                            |
| 46.32727273                                     | 15.04545455                                      | 55.99090909                                 | 38.5792562                             |
| 142.7342657                                     | 27.67132867                                      | 56.9458042                                  | 42.03162441                            |
| 49.52631579                                     | 6.855263158                                      | 7.480263158                                 | 2.964638158                            |
| 108.8781726                                     | 19.46700508                                      | 30.05837563                                 | 18.91904584                            |
| 77.57725948                                     | 20.56268222                                      | 175.9766764                                 | 148.4371308                            |
| 170.1868979                                     | 22.38342967                                      | 24.06165703                                 | 16.72267329                            |
| 72.94776119                                     | 14.05970149                                      | 24.09701493                                 | 14.59773892                            |
| 218.8686731                                     | 39.59917921                                      | 54.39398085                                 | 44.64865138                            |
| 103.278607                                      | 25.21393035                                      | 160.2910448                                 | 138.1167855                            |
| 168.0808241                                     | 31.03169572                                      | 207.4659271                                 | 188.9527503                            |
| 50.35135135                                     | 8.156756757                                      | 20.23243243                                 | 11.99398101                            |
| 121.6984925                                     | 22.58291457                                      | 36.66834171                                 | 25.86770536                            |
| 238.0151899                                     | 40.26075949                                      | 631.3620253                                 | 607.7842397                            |
| 130.350348                                      | 24.83758701                                      | 139.1113689                                 | 123.5354353                            |
| 111.0688073                                     | 19.91743119                                      | 25.93348624                                 | 16.10324783                            |
| 78.41860465                                     | 11.24806202                                      | 34.86821705                                 | 25.15702181                            |
| 134.1280992                                     | 25.41735537                                      | 366.5743802                                 | 339.2067823                            |
| 243.655914                                      | 53.70537634                                      | 213.8247312                                 | 190.4012129                            |
| 185.3203883                                     | 40.75485437                                      | 80.96601942                                 | 63.4765706                             |
| 130.0490018                                     | 37.01814882                                      | 365.3629764                                 | 329.3411945                            |
| 299.9967427                                     | 36.96742671                                      | 16.2432139                                  | 9.542929427                            |
| 190.5771429                                     | 34.39428571                                      | 40.06571429                                 | 27.79570612                            |
| 31.45454545                                     | 6.018181818                                      | 21.31818182                                 | 13.22157025                            |
| 12.6                                            | 4.542857143                                      | 29.11428571                                 | 14.45632653                            |
| 631.3381898                                     | 107.807064                                       | 179.0666667                                 | 163.8893643                            |

| log.sigma.5.0.mm.3D_glszm_ZonePercentage | log.sigma.5.0.mm.3D_glszm_LargeAreaLowGrayLevelEmphasis | log.sigma.5.0.mm.3D_glszm_LargeAreaHighGrayLevelEmphasis | log.sigma.5.0.mm.3D_glszm_HighGrayLevelZoneEmphasis |
|------------------------------------------|---------------------------------------------------------|----------------------------------------------------------|-----------------------------------------------------|
| 0.369806094                              | 0.176384541                                             | 5403.955056                                              | 338.9569288                                         |
| 0.449567723                              | 0.058171666                                             | 3407.480769                                              | 380.2435897                                         |
| 0.365470852                              | 0.092888498                                             | 5720.322086                                              | 379.5736196                                         |
| 0.48447205                               | 0.075998038                                             | 2098.262821                                              | 359.8205128                                         |
| 0.313253012                              | 0.44458714                                              | 4580.255656                                              | 214.6696833                                         |
| 0.425619835                              | 0.094135554                                             | 2502.067961                                              | 306.5242718                                         |
| 0.159787456                              | 17.11616131                                             | 249657.788                                               | 190.3159145                                         |
| 0.27653263                               | 0.554818827                                             | 19731.82241                                              | 318.5101311                                         |
| 0.221257626                              | 2.391814917                                             | 24353.19194                                              | 233.8144221                                         |
| 0.294039735                              | 0.421111133                                             | 4673.540541                                              | 225.7792793                                         |
| 0.145244216                              | 4.130728806                                             | 15121.84956                                              | 128.8628319                                         |
| 0.199295568                              | 4.117324465                                             | 48750.6377                                               | 201.4064801                                         |
| 0.397040691                              | 0.11187733                                              | 5870.170807                                              | 323.1677019                                         |
| 0.47826087                               | 0.205372922                                             | 2202.665584                                              | 364.7727273                                         |
| 0.325714286                              | 0.983501705                                             | 4448.744639                                              | 220.6920078                                         |
| 0.239500174                              | 2.886071058                                             | 60636.28768                                              | 217.4326087                                         |
| 0.169875425                              | 3.601410138                                             | 11161.39333                                              | 131.2333333                                         |
| 0.471882641                              | 0.116652449                                             | 2545.968912                                              | 340.9533679                                         |
| 0.178244973                              | 4.288566593                                             | 17519.74872                                              | 141.825641                                          |
| 0.230099096                              | 0.466648235                                             | 209963.0147                                              | 758.6791292                                         |
| 0.287295476                              | 0.602718591                                             | 7746.21943                                               | 214.3232831                                         |
| 0.338709677                              | 0.159025172                                             | 5109.22619                                               | 289.25                                              |
| 0.370967742                              | 0.189561921                                             | 3171.864734                                              | 243.0434783                                         |
| 0.143174868                              | 9.785635864                                             | 110628.5087                                              | 189.3029126                                         |
| 0.310260586                              | 0.224812023                                             | 14031.29134                                              | 373.1102362                                         |
| 0.292253521                              | 0.526153518                                             | 9593.358768                                              | 297.1659973                                         |
| 0.350798403                              | 0.265149847                                             | 6926.395448                                              | 344.0953058                                         |
| 0.222370173                              | 1.520056922                                             | 11719.37325                                              | 198.2015968                                         |
| 0.239726027                              | 0.417039784                                             | 4238.342857                                              | 126.0285714                                         |
| 0.288198758                              | 0.608324624                                             | 6595.5625                                                | 213.3771552                                         |
| 0.266151116                              | 1.26102583                                              | 10311.63074                                              | 241.7160262                                         |
| 0.383248731                              | 0.09380428                                              | 4394.043046                                              | 312.9139073                                         |
| 0.271092077                              | 0.828442803                                             | 16009.14376                                              | 285.1800948                                         |
| 0.238095238                              | 0.905647544                                             | 18655.80522                                              | 238.2434783                                         |
| 0.259887006                              | 1.325049663                                             | 15019.18891                                              | 249.1034483                                         |
| 0.336771532                              | 0.237900221                                             | 8500.050536                                              | 297.0796325                                         |
| 0.386243386                              | 0.066978798                                             | 5327.996575                                              | 403.9297945                                         |
| 0.253049304                              | 2.588769941                                             | 138205.7054                                              | 311.221317                                          |
| 0.242857143                              | 0.51673788                                              | 8289.477941                                              | 181.4411765                                         |
| 0.167672277                              | 2.435495439                                             | 210484.7967                                              | 410.5107323                                         |
| 0.324626866                              | 0.333526584                                             | 3860.337931                                              | 264.1448276                                         |
| 0.105430183                              | 18.55106912                                             | 428618.0318                                              | 242.2173913                                         |
| 0.373035567                              | 0.176997906                                             | 6033.889135                                              | 361.827051                                          |
| 0.366901408                              | 0.39536365                                              | 3193.523992                                              | 245.756238                                          |
| 0.194087404                              | 3.045621793                                             | 54699.13907                                              | 221.1390728                                         |
| 0.350270721                              | 0.29736096                                              | 5443.351962                                              | 271.4494649                                         |
| 0.21888376                               | 1.325387353                                             | 34395.68659                                              | 266.2724167                                         |
| 0.287169043                              | 0.872807242                                             | 4031.432624                                              | 137.3191489                                         |
| 0.31713555                               | 0.676922888                                             | 3768.620968                                              | 215.0241935                                         |
| 0.353982301                              | 0.122142408                                             | 3747.00625                                               | 259.4                                               |
| 0.362082362                              | 0.510995864                                             | 2687.830472                                              | 255.5965665                                         |
| 0.31059246                               | 0.194941782                                             | 9647.830058                                              | 355.2                                               |
| 0.107447342                              | 38.82924727                                             | 607449.867                                               | 193.8424737                                         |
| 0.211936663                              | 1.168079879                                             | 31245.73851                                              | 275.7614943                                         |
| 0.465007776                              | 0.148138093                                             | 3276.695652                                              | 386.6923077                                         |
| 0.356292517                              | 0.331698665                                             | 2906.02864                                               | 232.8400955                                         |
| 0.241594022                              | 1.120644476                                             | 18238.32887                                              | 240                                                 |
| 0.306240929                              | 0.259254244                                             | 5103.096367                                              | 262.685624                                          |
| 0.322411533                              | 0.190856549                                             | 6137.654472                                              | 289.4268293                                         |
| 0.139998164                              | 16.74679501                                             | 613674.8472                                              | 246.9645902                                         |
| 0.319789315                              | 0.315987254                                             | 5688.985882                                              | 240.1035294                                         |
| 0.338336714                              | 0.137965423                                             | 10312.60072                                              | 370.7553957                                         |
| 0.277143551                              | 0.674235764                                             | 50482.16608                                              | 442.2611744                                         |
| 0.284828244                              | 0.282578547                                             | 11657.96817                                              | 325.1876047                                         |
| 0.317577548                              | 0.441597457                                             | 3262.604651                                              | 173.1023256                                         |
| 0.306927799                              | 0.138631628                                             | 10725.34                                                 | 375.8704762                                         |
| 0.418719212                              | 0.100247512                                             | 2964.052941                                              | 309.0823529                                         |
| 0.259980334                              | 0.814899031                                             | 20788.62405                                              | 326.0854766                                         |
| 0.169419286                              | 3.251316792                                             | 75097.2327                                               | 228.2649371                                         |
| 0.280131827                              | 0.213301957                                             | 10072.09748                                              | 246.0521008                                         |
| 0.357723577                              | 0.381731075                                             | 2526.034091                                              | 202.4204545                                         |
| 0.271029914                              | 1.165490625                                             | 34786.15037                                              | 271.3259259                                         |
| 0.368539326                              | 0.356991662                                             | 2579.780488                                              | 241.6626016                                         |
| 0.343157895                              | 0.4644545                                               | 2443.279141                                              | 166.2392638                                         |
| 0.181684623                              | 3.163705371                                             | 87203.18329                                              | 303.3867925                                         |
| 0.239651416                              | 1.723020209                                             | 4633.695455                                              | 117.75                                              |
| 0.258940697                              | 0.380499161                                             | 13562.39161                                              | 265.4912587                                         |
| 0.470588235                              | 0.033545573                                             | 3639.684211                                              | 463.6052632                                         |
| 0.299619772                              | 0.207717133                                             | 6972.385787                                              | 265.4365482                                         |
| 0.190555556                              | 1.612950592                                             | 24643.99417                                              | 207.9300292                                         |
| 0.36913229                               | 0.183184197                                             | 5330.460501                                              | 335.1541426                                         |
| 0.324455206                              | 0.123739128                                             | 7964.63806                                               | 253.4440299                                         |
| 0.320333041                              | 0.946896537                                             | 7405.790698                                              | 200.6087551                                         |
| 0.212361331                              | 1.732066526                                             | 18370.70647                                              | 207.641791                                          |
| 0.232412523                              | 1.636751684                                             | 31643.76228                                              | 247.1901743                                         |
| 0.348399247                              | 0.051090145                                             | 11502.44324                                              | 468.4486486                                         |
| 0.304281346                              | 0.413377404                                             | 6070.944724                                              | 228.9522613                                         |
| 0.205943691                              | 5.570473245                                             | 87499.03924                                              | 248.3481013                                         |
| 0.253380364                              | 1.223522679                                             | 18423.01856                                              | 210.4176334                                         |
| 0.318946598                              | 0.443736358                                             | 5018.401376                                              | 237.6100917                                         |
| 0.320895522                              | 0.113232536                                             | 14027.74419                                              | 445.4806202                                         |
| 0.191153239                              | 1.962363884                                             | 75934.01653                                              | 298.3140496                                         |
| 0.206620751                              | 1.385841352                                             | 38618.28172                                              | 277.6612903                                         |
| 0.239117818                              | 0.825758392                                             | 11655.87985                                              | 240.243932                                          |
| 0.166616269                              | 3.882930282                                             | 43730.75136                                              | 195.7477314                                         |
| 0.386325503                              | 0.142389504                                             | 4415.187839                                              | 335.4136808                                         |
| 0.28548124                               | 0.699813887                                             | 5761.567143                                              | 209.63                                              |
| 0.3514377                                | 0.129073661                                             | 6236.818182                                              | 267.1                                               |
| 0.26119403                               | 0.287529839                                             | 5227.842857                                              | 161.2142857                                         |
| 0.25668631                               | 0.668561319                                             | 53326.99912                                              | 340.7642384                                         |

|                                             |                                                    |                                       |                                                         |
|---------------------------------------------|----------------------------------------------------|---------------------------------------|---------------------------------------------------------|
| log.sigma.5.0.mm.3D_glszm_SmallAreaEmphasis | log.sigma.5.0.mm.3D_glszm_LowGrayLevelZoneEmphasis | log.sigma.5.0.mm.3D_glszm_ZoneEntropy | log.sigma.5.0.mm.3D_glszm_SmallAreaLowGrayLevelEmphasis |
| 0.587515544                                 | 0.009725051                                        | 6.623105539                           | 0.00656064                                              |
| 0.60343743                                  | 0.012987805                                        | 5.925331768                           | 0.009531196                                             |
| 0.577190097                                 | 0.009198409                                        | 6.483559958                           | 0.006743807                                             |
| 0.5900308                                   | 0.016154731                                        | 6.050514661                           | 0.007664179                                             |
| 0.492721632                                 | 0.02056509                                         | 6.717753139                           | 0.008198548                                             |
| 0.553263657                                 | 0.019337936                                        | 5.815154838                           | 0.015067458                                             |
| 0.528751659                                 | 0.017092653                                        | 6.984776291                           | 0.007870014                                             |
| 0.556932371                                 | 0.006852971                                        | 6.920428967                           | 0.003890994                                             |
| 0.510543872                                 | 0.011712137                                        | 6.831997105                           | 0.006152729                                             |
| 0.520798563                                 | 0.016645665                                        | 6.299921624                           | 0.011194431                                             |
| 0.429425562                                 | 0.022925811                                        | 6.379681952                           | 0.011012856                                             |
| 0.522042116                                 | 0.014374678                                        | 6.675546991                           | 0.006990274                                             |
| 0.580962762                                 | 0.011247601                                        | 6.371044115                           | 0.00714486                                              |
| 0.639116481                                 | 0.010742546                                        | 6.13363298                            | 0.004530773                                             |
| 0.591297891                                 | 0.012622931                                        | 6.29885505                            | 0.004801867                                             |
| 0.5440503                                   | 0.012591881                                        | 6.81846185                            | 0.005853475                                             |
| 0.467440038                                 | 0.024288343                                        | 5.937738631                           | 0.009329686                                             |
| 0.575034897                                 | 0.018931564                                        | 6.17216386                            | 0.014316932                                             |
| 0.522465785                                 | 0.022777328                                        | 6.051711425                           | 0.008068837                                             |
| 0.52021023                                  | 0.002121481                                        | 7.184187642                           | 0.00134071                                              |
| 0.525950421                                 | 0.018525547                                        | 6.65210889                            | 0.00834092                                              |
| 0.537489423                                 | 0.015093114                                        | 6.118487367                           | 0.009774321                                             |
| 0.521601646                                 | 0.015805728                                        | 6.188234502                           | 0.0053656                                               |
| 0.517077678                                 | 0.012494727                                        | 6.491142355                           | 0.004877854                                             |
| 0.608322206                                 | 0.008623472                                        | 6.463773338                           | 0.005522926                                             |
| 0.523128105                                 | 0.010711444                                        | 6.82883738                            | 0.0053618                                               |
| 0.590626466                                 | 0.008208764                                        | 6.549711721                           | 0.004675586                                             |
| 0.528176829                                 | 0.015023294                                        | 6.535557479                           | 0.007579495                                             |
| 0.472247845                                 | 0.04576263                                         | 5.014997303                           | 0.03884383                                              |
| 0.565656195                                 | 0.015482388                                        | 6.465109571                           | 0.01043874                                              |
| 0.529600001                                 | 0.010848613                                        | 6.746710492                           | 0.005135518                                             |
| 0.551785367                                 | 0.011635541                                        | 6.319931344                           | 0.008130485                                             |
| 0.53822762                                  | 0.009593188                                        | 6.746842079                           | 0.005578551                                             |
| 0.505700059                                 | 0.008854107                                        | 6.548316092                           | 0.004820455                                             |
| 0.553658897                                 | 0.010431266                                        | 6.785363622                           | 0.005484459                                             |
| 0.550028258                                 | 0.009798975                                        | 6.628331804                           | 0.004167278                                             |
| 0.559157466                                 | 0.007182906                                        | 6.614804482                           | 0.004289515                                             |
| 0.608057045                                 | 0.007667876                                        | 6.635091905                           | 0.004786897                                             |
| 0.408150298                                 | 0.020208574                                        | 6.080038349                           | 0.005504436                                             |
| 0.523622814                                 | 0.004511094                                        | 7.055388518                           | 0.002719039                                             |
| 0.523523791                                 | 0.011211528                                        | 6.558855641                           | 0.00622805                                              |
| 0.514331654                                 | 0.008878194                                        | 6.59128292                            | 0.004758257                                             |
| 0.587815537                                 | 0.007857446                                        | 6.692301108                           | 0.004675505                                             |
| 0.578783103                                 | 0.01364518                                         | 6.372639438                           | 0.008390596                                             |
| 0.550443034                                 | 0.01439016                                         | 6.306287398                           | 0.008538833                                             |
| 0.59156442                                  | 0.008955129                                        | 6.503388326                           | 0.004818721                                             |
| 0.518393258                                 | 0.007186812                                        | 6.72210025                            | 0.003529056                                             |
| 0.505839099                                 | 0.032736398                                        | 5.839916162                           | 0.012199267                                             |
| 0.517401227                                 | 0.023634078                                        | 5.944853443                           | 0.005096067                                             |
| 0.475812903                                 | 0.016050001                                        | 6.065372902                           | 0.010527959                                             |
| 0.590535338                                 | 0.010920717                                        | 6.367402286                           | 0.006593292                                             |
| 0.553271294                                 | 0.008983139                                        | 6.804828679                           | 0.006421144                                             |
| 0.474768707                                 | 0.012489687                                        | 6.927850867                           | 0.004707337                                             |
| 0.531195948                                 | 0.010026136                                        | 6.487084686                           | 0.006822566                                             |
| 0.62637497                                  | 0.013269204                                        | 6.329408024                           | 0.00690936                                              |
| 0.51697941                                  | 0.013902546                                        | 6.538552636                           | 0.007661485                                             |
| 0.535211935                                 | 0.009467964                                        | 6.744467682                           | 0.003961478                                             |
| 0.492796189                                 | 0.009265426                                        | 6.781442385                           | 0.004012821                                             |
| 0.524005914                                 | 0.012661404                                        | 6.322113674                           | 0.009245706                                             |
| 0.525023296                                 | 0.00951927                                         | 6.947935265                           | 0.0041106                                               |
| 0.572884796                                 | 0.014239208                                        | 6.4558715                             | 0.01017191                                              |
| 0.540663754                                 | 0.006846936                                        | 6.894488134                           | 0.004514186                                             |
| 0.568431045                                 | 0.00415602                                         | 6.989143371                           | 0.002545758                                             |
| 0.527092564                                 | 0.009186599                                        | 6.916270973                           | 0.004198799                                             |
| 0.520914834                                 | 0.022453655                                        | 6.157869146                           | 0.011067469                                             |
| 0.52260624                                  | 0.006109696                                        | 6.959430396                           | 0.003603816                                             |
| 0.542532442                                 | 0.01573203                                         | 6.084415537                           | 0.010693483                                             |
| 0.529610666                                 | 0.007049734                                        | 6.911074327                           | 0.003343056                                             |
| 0.482801735                                 | 0.008720227                                        | 7.005992201                           | 0.004329441                                             |
| 0.492388811                                 | 0.009876781                                        | 6.840726519                           | 0.005881966                                             |
| 0.540043707                                 | 0.024588434                                        | 6.045794228                           | 0.016813215                                             |
| 0.553031637                                 | 0.010693858                                        | 6.873678938                           | 0.005354952                                             |
| 0.525141688                                 | 0.017000811                                        | 6.609224086                           | 0.009148029                                             |
| 0.58193319                                  | 0.019286711                                        | 6.069730378                           | 0.010214361                                             |
| 0.533702695                                 | 0.008617011                                        | 6.779197464                           | 0.003416131                                             |
| 0.455585487                                 | 0.030927975                                        | 6.337854801                           | 0.01295457                                              |
| 0.508130939                                 | 0.011053989                                        | 6.821324116                           | 0.005503543                                             |
| 0.57815108                                  | 0.012894552                                        | 6.129419168                           | 0.011084351                                             |
| 0.540434484                                 | 0.014011828                                        | 6.561170669                           | 0.009865676                                             |
| 0.478877077                                 | 0.014541238                                        | 6.548198842                           | 0.00877508                                              |
| 0.591170077                                 | 0.011790571                                        | 6.6134129                             | 0.008337296                                             |
| 0.532857286                                 | 0.013965562                                        | 6.336666788                           | 0.010005233                                             |
| 0.562418174                                 | 0.013437519                                        | 6.466487389                           | 0.005586767                                             |
| 0.513523995                                 | 0.012838371                                        | 6.439476839                           | 0.00503906                                              |
| 0.525904868                                 | 0.012492128                                        | 6.725496669                           | 0.006436161                                             |
| 0.518596901                                 | 0.010074029                                        | 6.28968981                            | 0.008271999                                             |
| 0.570611531                                 | 0.011778434                                        | 6.318343063                           | 0.00541245                                              |
| 0.564249614                                 | 0.009970848                                        | 6.586478601                           | 0.005300558                                             |
| 0.56740349                                  | 0.01282512                                         | 6.331449948                           | 0.007442688                                             |
| 0.508774644                                 | 0.020709095                                        | 6.686279219                           | 0.010115334                                             |
| 0.565904068                                 | 0.009353961                                        | 6.393933979                           | 0.007618661                                             |
| 0.541335436                                 | 0.009017544                                        | 6.548851365                           | 0.004053939                                             |
| 0.52501892                                  | 0.00718159                                         | 6.786224654                           | 0.003232285                                             |
| 0.474804572                                 | 0.01224556                                         | 7.026555489                           | 0.005610922                                             |
| 0.495761474                                 | 0.011399681                                        | 6.60701771                            | 0.005529771                                             |
| 0.588818936                                 | 0.009073938                                        | 6.831478279                           | 0.00449086                                              |
| 0.537315399                                 | 0.020010592                                        | 6.827471962                           | 0.013246056                                             |
| 0.53948391                                  | 0.019256963                                        | 5.813673605                           | 0.015125385                                             |
| 0.394695756                                 | 0.031209694                                        | 5.600432303                           | 0.019948449                                             |
| 0.54182265                                  | 0.005615428                                        | 7.039542057                           | 0.003361938                                             |

| log.sigma.5.0.mm.3D_ngtdm_Coarseness | log.sigma.5.0.mm.3D_ngtdm_Complexity | log.sigma.5.0.mm.3D_ngtdm_Strength | log.sigma.5.0.mm.3D_ngtdm_Busyness | log.sigma.5.0.mm.3D_ngtdm_Contrast |
|--------------------------------------|--------------------------------------|------------------------------------|------------------------------------|------------------------------------|
| 0.009487064                          | 0.502376804                          | 2.848189951                        | 0.253024278                        | 0.000101397                        |
| 0.027368798                          | 2.601577963                          | 8.826419517                        | 0.069429565                        | 0.000624732                        |
| 0.012804889                          | 1.063340656                          | 4.269356056                        | 0.139488053                        | 0.000170684                        |
| 0.033315131                          | 2.759737517                          | 10.77355008                        | 0.058474669                        | 0.000620604                        |
| 0.009035411                          | 0.372270356                          | 2.216718195                        | 0.339083042                        | 0.000103745                        |
| 0.057839459                          | 2.123527548                          | 13.81382112                        | 0.045600136                        | 0.000748918                        |
| 0.001496508                          | 0.047817943                          | 0.64790372                         | 1.639987436                        | 4.00E-06                           |
| 0.002165261                          | 0.131795775                          | 0.84987749                         | 0.865662719                        | 1.35E-05                           |
| 0.003083841                          | 0.111134828                          | 0.828122451                        | 1.053881012                        | 2.07E-05                           |
| 0.018108475                          | 0.523253392                          | 3.715597525                        | 0.193658777                        | 0.000155054                        |
| 0.008956478                          | 0.104740146                          | 1.135423123                        | 0.628078411                        | 3.69E-05                           |
| 0.004000265                          | 0.125512555                          | 1.14451879                         | 0.713905579                        | 1.82E-05                           |
| 0.014661106                          | 0.991166228                          | 4.722168493                        | 0.124050668                        | 0.000204145                        |
| 0.016285551                          | 1.437039018                          | 5.411455027                        | 0.118962297                        | 0.000340238                        |
| 0.00775639                           | 0.417764887                          | 2.45412128                         | 0.40568514                         | 6.80E-05                           |
| 0.002477161                          | 0.091035624                          | 0.651160263                        | 1.158312769                        | 1.61E-05                           |
| 0.014795207                          | 0.182900011                          | 1.547146913                        | 0.464490765                        | 0.000101943                        |
| 0.026434694                          | 2.205803581                          | 8.559519479                        | 0.077956041                        | 0.000554239                        |
| 0.012238414                          | 0.153797359                          | 1.512961886                        | 0.448590712                        | 6.14E-05                           |
| 0.001616369                          | 0.093104308                          | 0.85461073                         | 0.54405086                         | 5.68E-06                           |
| 0.00569643                           | 0.1943006                            | 1.090516755                        | 0.63135153                         | 8.38E-05                           |
| 0.021921486                          | 0.946080741                          | 5.166072239                        | 0.10626422                         | 0.000299146                        |
| 0.023391887                          | 0.987198828                          | 5.817680799                        | 0.11085388                         | 0.000210544                        |
| 0.003884473                          | 0.074990151                          | 0.958462516                        | 0.790861431                        | 1.12E-05                           |
| 0.01144774                           | 0.666662896                          | 3.989268304                        | 0.156797342                        | 8.92E-05                           |
| 0.005288985                          | 0.286645193                          | 1.979284626                        | 0.439432511                        | 3.95E-05                           |
| 0.006266716                          | 0.375640084                          | 1.953299352                        | 0.35449078                         | 6.04E-05                           |
| 0.006277932                          | 0.141495027                          | 1.217089648                        | 0.580777164                        | 3.44E-05                           |
| 0.087594722                          | 0.893691185                          | 8.86203384                         | 0.065651768                        | 0.000517385                        |
| 0.007173326                          | 0.322613842                          | 1.922431099                        | 0.3965459                          | 5.81E-05                           |
| 0.003214967                          | 0.137160517                          | 0.884205355                        | 1.00172896                         | 2.70E-05                           |
| 0.01195707                           | 0.905810471                          | 3.196371786                        | 0.187703806                        | 0.000247769                        |
| 0.006300085                          | 0.306653982                          | 2.607184548                        | 0.325625836                        | 3.25E-05                           |
| 0.00554013                           | 0.231937215                          | 1.893216312                        | 0.43713084                         | 2.87E-05                           |
| 0.002585556                          | 0.109135666                          | 0.804827831                        | 1.055113663                        | 1.59E-05                           |
| 0.006192033                          | 0.321042153                          | 1.568161776                        | 0.373648463                        | 7.61E-05                           |
| 0.007274946                          | 0.612262769                          | 2.627367591                        | 0.211048763                        | 9.49E-05                           |
| 0.002661856                          | 0.118401541                          | 1.042097295                        | 0.665706697                        | 1.17E-05                           |
| 0.019552848                          | 0.443619403                          | 2.899704144                        | 0.202193668                        | 0.000229201                        |
| 0.001629782                          | 0.071967564                          | 0.960953661                        | 0.709590068                        | 3.15E-06                           |
| 0.009496304                          | 0.465565948                          | 2.731295955                        | 0.292057389                        | 9.95E-05                           |
| 0.002491275                          | 0.055639326                          | 1.015551251                        | 0.775253558                        | 3.35E-06                           |
| 0.004695453                          | 0.439878312                          | 1.828577283                        | 0.395295935                        | 6.23E-05                           |
| 0.008492295                          | 0.502546407                          | 2.789081957                        | 0.323762533                        | 9.02E-05                           |
| 0.008991865                          | 0.254961484                          | 2.556387015                        | 0.279253073                        | 3.56E-05                           |
| 0.005096492                          | 0.249792772                          | 1.280404557                        | 0.56260883                         | 5.63E-05                           |
| 0.002577627                          | 0.095180862                          | 0.803232686                        | 0.826731297                        | 1.04E-05                           |
| 0.021009302                          | 0.472686081                          | 2.462007218                        | 0.243251177                        | 0.000268473                        |
| 0.033518216                          | 1.232938819                          | 9.019192345                        | 0.102103271                        | 0.000305421                        |
| 0.025190064                          | 1.050152622                          | 5.39932687                         | 0.112769032                        | 0.000336209                        |
| 0.00866175                           | 0.535587519                          | 2.715786981                        | 0.380784238                        | 0.000109595                        |
| 0.005066282                          | 0.25276237                           | 1.736056507                        | 0.370519296                        | 3.26E-05                           |
| 0.001883328                          | 0.039610783                          | 0.674494646                        | 1.261187031                        | 3.19E-06                           |
| 0.008209486                          | 0.278618698                          | 2.332120324                        | 0.265800206                        | 3.39E-05                           |
| 0.017556434                          | 1.499423619                          | 6.076614144                        | 0.104345208                        | 0.000352713                        |
| 0.010077683                          | 0.439276603                          | 2.227468786                        | 0.380470969                        | 0.000152359                        |
| 0.003362407                          | 0.161362135                          | 1.316456981                        | 0.689837317                        | 1.67E-05                           |
| 0.005188609                          | 0.298967202                          | 1.288896756                        | 0.563437226                        | 7.05E-05                           |
| 0.014692949                          | 0.681066352                          | 3.432117783                        | 0.167926761                        | 0.000165391                        |
| 0.001521473                          | 0.042525427                          | 0.61583607                         | 1.150830798                        | 2.79E-06                           |
| 0.009739539                          | 0.443029194                          | 2.810667009                        | 0.258026277                        | 6.76E-05                           |
| 0.00572672                           | 0.402659335                          | 2.519942339                        | 0.26150952                         | 4.02E-05                           |
| 0.001813967                          | 0.117437595                          | 0.888113821                        | 0.717159193                        | 8.45E-06                           |
| 0.007170527                          | 0.313735864                          | 2.482364419                        | 0.255949541                        | 4.43E-05                           |
| 0.017796923                          | 0.486218129                          | 2.747607186                        | 0.265037376                        | 0.000194297                        |
| 0.003967657                          | 0.281330877                          | 1.841112392                        | 0.352012286                        | 2.35E-05                           |
| 0.022309743                          | 1.581994499                          | 5.784812125                        | 0.099249165                        | 0.000497921                        |
| 0.002716474                          | 0.141964524                          | 1.126541121                        | 0.690612439                        | 1.38E-05                           |
| 0.001779477                          | 0.071582165                          | 0.694943407                        | 1.199429331                        | 6.41E-06                           |
| 0.005840916                          | 0.222629557                          | 1.30278977                         | 0.454458849                        | 5.59E-05                           |
| 0.021558692                          | 0.813087682                          | 3.955657158                        | 0.197219244                        | 0.000393285                        |
| 0.002819568                          | 0.135300644                          | 0.907822763                        | 0.76297533                         | 1.82E-05                           |
| 0.007794206                          | 0.52986286                           | 2.178334453                        | 0.408945441                        | 0.000146438                        |
| 0.01256936                           | 0.369439623                          | 2.389817592                        | 0.377371008                        | 0.000119652                        |
| 0.004400703                          | 0.139707717                          | 2.203694187                        | 0.388075139                        | 9.55E-06                           |
| 0.012746752                          | 0.198850449                          | 1.368915367                        | 0.531485006                        | 0.000127964                        |
| 0.006047981                          | 0.255971061                          | 1.762716355                        | 0.366590533                        | 4.15E-05                           |
| 0.025756812                          | 3.206456963                          | 11.25392788                        | 0.054239425                        | 0.000651439                        |
| 0.011126611                          | 0.311629329                          | 2.368663128                        | 0.24644082                         | 8.27E-05                           |
| 0.007514874                          | 0.198718836                          | 1.745978871                        | 0.378052481                        | 3.32E-05                           |
| 0.009765678                          | 0.511080635                          | 2.944220844                        | 0.246672947                        | 0.000102823                        |
| 0.013997889                          | 0.593328629                          | 3.452310544                        | 0.166490505                        | 0.000158379                        |
| 0.005076579                          | 0.250994883                          | 1.303599653                        | 0.653800521                        | 5.04E-05                           |
| 0.006809855                          | 0.221910557                          | 1.716596288                        | 0.432106795                        | 3.47E-05                           |
| 0.005728167                          | 0.176500745                          | 1.697455223                        | 0.435187896                        | 2.71E-05                           |
| 0.017129527                          | 1.862866797                          | 9.564620475                        | 0.062625467                        | 0.000218214                        |
| 0.009288733                          | 0.388478378                          | 2.330652008                        | 0.296471699                        | 7.82E-05                           |
| 0.003952214                          | 0.123417178                          | 1.28417723                         | 0.62104814                         | 1.62E-05                           |
| 0.007540274                          | 0.247479333                          | 1.781004626                        | 0.38246508                         | 4.32E-05                           |
| 0.009584639                          | 0.374437549                          | 2.242889017                        | 0.336696709                        | 0.000112199                        |
| 0.019662525                          | 0.82317926                           | 6.672286886                        | 0.083331907                        | 0.000135729                        |
| 0.005591657                          | 0.173240037                          | 1.534986265                        | 0.376309273                        | 2.36E-05                           |
| 0.003100726                          | 0.115654883                          | 1.077639647                        | 0.622263162                        | 1.09E-05                           |
| 0.003889084                          | 0.175250098                          | 1.345523015                        | 0.643069275                        | 2.21E-05                           |
| 0.00419591                           | 0.081569203                          | 0.794735576                        | 0.827056599                        | 1.77E-05                           |
| 0.005522637                          | 0.410660623                          | 2.063956918                        | 0.365945307                        | 6.45E-05                           |
| 0.005400734                          | 0.229551552                          | 1.496327221                        | 0.561991086                        | 4.72E-05                           |
| 0.031760597                          | 1.446179749                          | 7.264314703                        | 0.083863591                        | 0.000498634                        |
| 0.033297472                          | 1.08204812                           | 5.093670201                        | 0.108215811                        | 0.000477441                        |
| 0.001659849                          | 0.082544681                          | 0.616791039                        | 0.96627211                         | 8.06E-06                           |

| log.sigma.4.5.mm.3D_gldm_GrayLevelVariance | log.sigma.4.5.mm.3D_gldm_HighGrayLevelEmphasis | log.sigma.4.5.mm.3D_gldm_GrayLevelNonUniformityNormalized | log.sigma.4.5.mm.3D_gldm_DependenceEntropy |
|--------------------------------------------|------------------------------------------------|-----------------------------------------------------------|--------------------------------------------|
| 38.5536881                                 | 287.0090028                                    | 0.045587434                                               | 6.842870082                                |
| 39.63311713                                | 345.4293948                                    | 0.048542883                                               | 6.212453005                                |
| 36.0524543                                 | 321.2533632                                    | 0.046338656                                               | 6.689068961                                |
| 44.10868601                                | 347.9720497                                    | 0.044153389                                               | 6.15991913                                 |
| 31.99550962                                | 207.4500354                                    | 0.050114997                                               | 6.63304615                                 |
| 37.72290144                                | 295.8429752                                    | 0.047537736                                               | 6.059050947                                |
| 17.20848001                                | 140.9669798                                    | 0.086702546                                               | 7.327842999                                |
| 27.7967148                                 | 260.0125247                                    | 0.056528157                                               | 7.178684589                                |
| 21.95374267                                | 158.1342093                                    | 0.068878421                                               | 7.064967538                                |
| 23.4531889                                 | 159.0291391                                    | 0.057336082                                               | 6.495204316                                |
| 11.04825958                                | 96.23071979                                    | 0.09315214                                                | 6.523665287                                |
| 17.64152982                                | 148.3668917                                    | 0.076714673                                               | 7.095972884                                |
| 39.32036228                                | 281.7348952                                    | 0.047717801                                               | 6.642209235                                |
| 44.05150988                                | 310.5419255                                    | 0.043695266                                               | 6.478075623                                |
| 26.66348199                                | 166.5034921                                    | 0.057125523                                               | 6.809798638                                |
| 24.80499029                                | 182.6775425                                    | 0.064045987                                               | 7.372678313                                |
| 13.53329853                                | 101.3363533                                    | 0.075159455                                               | 6.495348378                                |
| 44.74217634                                | 308.6259169                                    | 0.045785236                                               | 6.337800734                                |
| 11.3362332                                 | 99.1882982                                     | 0.091509614                                               | 6.626982576                                |
| 24.16483268                                | 522.6702603                                    | 0.061416877                                               | 7.134692068                                |
| 29.14120452                                | 208.1573628                                    | 0.052122191                                               | 6.766737983                                |
| 27.30504927                                | 250.5544355                                    | 0.058622203                                               | 6.26912151                                 |
| 26.8043576                                 | 200.1182796                                    | 0.055568402                                               | 6.426106372                                |
| 11.66684235                                | 129.3805949                                    | 0.103749928                                               | 6.885074387                                |
| 34.21951095                                | 338.6197068                                    | 0.049902386                                               | 7.079256477                                |
| 32.41469518                                | 340.7496088                                    | 0.052219638                                               | 7.04764624                                 |
| 31.91757702                                | 260.011976                                     | 0.051082466                                               | 6.803367866                                |
| 18.33029177                                | 157.0324012                                    | 0.065471318                                               | 6.780328876                                |
| 10.53724901                                | 100.3972603                                    | 0.09316945                                                | 5.683745302                                |
| 21.15284325                                | 180.3670807                                    | 0.061738359                                               | 6.608613752                                |
| 26.15746399                                | 193.3851334                                    | 0.055731986                                               | 7.052714548                                |
| 34.4791978                                 | 333.356599                                     | 0.0489706                                                 | 6.543858296                                |
| 27.68677301                                | 211.2051392                                    | 0.056377534                                               | 7.032652003                                |
| 12.83371972                                | 208.1929607                                    | 0.062838625                                               | 6.939915844                                |
| 23.47442609                                | 190.0820183                                    | 0.060988992                                               | 7.077501316                                |
| 31.88631231                                | 295.6848891                                    | 0.04965395                                                | 6.889142678                                |
| 38.90210066                                | 404.2883598                                    | 0.046864065                                               | 6.731711332                                |
| 26.11358976                                | 223.1394949                                    | 0.074183212                                               | 7.418048425                                |
| 18.09617028                                | 154.0267857                                    | 0.069885204                                               | 6.148882027                                |
| 17.39935723                                | 410.6995872                                    | 0.076721978                                               | 7.291966955                                |
| 31.60884997                                | 209.5126866                                    | 0.049345066                                               | 6.7497108                                  |
| 9.266510471                                | 148.4499295                                    | 0.114844703                                               | 6.906661467                                |
| 40.22003638                                | 331.6153846                                    | 0.043653848                                               | 6.968880297                                |
| 31.97748661                                | 215.828169                                     | 0.049101369                                               | 6.657511322                                |
| 16.71108769                                | 164.937018                                     | 0.085069984                                               | 6.99238574                                 |
| 30.20377252                                | 235.2265723                                    | 0.050300262                                               | 6.885282649                                |
| 18.336067                                  | 246.2947113                                    | 0.067456971                                               | 7.026190775                                |
| 16.07533568                                | 130.5784114                                    | 0.074767402                                               | 6.211146665                                |
| 28.81023803                                | 167.8209719                                    | 0.056351018                                               | 6.297552977                                |
| 29.93121525                                | 288.9845133                                    | 0.053430182                                               | 6.019032542                                |
| 30.56943229                                | 173.2113442                                    | 0.05335345                                                | 6.626579238                                |
| 30.33967478                                | 312.5314183                                    | 0.051714977                                               | 6.895487313                                |
| 10.52170929                                | 113.6475677                                    | 0.119035265                                               | 7.156218429                                |
| 17.28412367                                | 259.406821                                     | 0.070148552                                               | 6.88746724                                 |
| 48.92062141                                | 387.9844479                                    | 0.041086083                                               | 6.551438985                                |
| 33.15130197                                | 189.210034                                     | 0.047785356                                               | 6.600791243                                |
| 22.56539186                                | 185.5075965                                    | 0.061723146                                               | 7.119031756                                |
| 28.81214299                                | 267.6918239                                    | 0.051663328                                               | 6.710879292                                |
| 4.82281949                                 | 221.2634338                                    | 0.056469857                                               | 6.4811003                                  |
| 14.65460275                                | 223.0517764                                    | 0.092192737                                               | 7.359550271                                |
| 24.3123696                                 | 212.2024078                                    | 0.057423081                                               | 6.758451552                                |
| 35.67572366                                | 366.4876268                                    | 0.046983942                                               | 6.941966645                                |
| 31.12827393                                | 390.5194316                                    | 0.051682453                                               | 7.276512329                                |
| 31.493721                                  | 298.7132634                                    | 0.051665113                                               | 6.983167068                                |
| 20.68368792                                | 156.9556869                                    | 0.060447844                                               | 6.389584384                                |
| 31.11495662                                | 357.5609471                                    | 0.050471062                                               | 6.876884788                                |
| 31.63455192                                | 314.0566502                                    | 0.055267053                                               | 6.161136755                                |
| 26.33823336                                | 259.7457227                                    | 0.057781645                                               | 6.983937921                                |
| 17.58220051                                | 188.4573788                                    | 0.069048706                                               | 7.080709628                                |
| 24.77130414                                | 257.3338041                                    | 0.056091977                                               | 6.735055354                                |
| 28.35876049                                | 158.4207317                                    | 0.053225593                                               | 6.27396382                                 |
| 27.15108829                                | 222.5332263                                    | 0.060097433                                               | 7.087535985                                |
| 36.3550674                                 | 216.8397004                                    | 0.047382906                                               | 6.59984834                                 |
| 21.48554017                                | 144.3452632                                    | 0.06014626                                                | 6.429784286                                |
| 20.84810507                                | 214.4422135                                    | 0.075461945                                               | 7.179813851                                |
| 15.03969508                                | 124.08061                                      | 0.070279237                                               | 6.274294038                                |
| 25.30016122                                | 257.9144409                                    | 0.055466126                                               | 6.840986453                                |
| 44.75973123                                | 495.0402477                                    | 0.050772077                                               | 6.247265999                                |
| 25.83158004                                | 222.7695817                                    | 0.054889907                                               | 6.62221732                                 |
| 15.30207284                                | 149.1155556                                    | 0.073815432                                               | 6.788450435                                |
| 38.11189041                                | 282.9253201                                    | 0.046054402                                               | 6.841000884                                |
| 26.00259279                                | 264.0060533                                    | 0.055880611                                               | 6.482999197                                |
| 24.62505406                                | 163.7037686                                    | 0.057052834                                               | 6.884701869                                |
| 16.20993685                                | 141.8203909                                    | 0.07111111                                                | 6.602253073                                |
| 23.08777578                                | 197.0556169                                    | 0.066191305                                               | 7.072444162                                |
| 31.18929923                                | 473.4557439                                    | 0.07057359                                                | 6.16472021                                 |
| 24.56508992                                | 211.67737                                      | 0.055753117                                               | 6.734789525                                |
| 20.7296337                                 | 149.217414                                     | 0.078629302                                               | 7.273030921                                |
| 19.0270011                                 | 203.3862434                                    | 0.068154051                                               | 6.774805208                                |
| 31.56825882                                | 240.7271397                                    | 0.050286056                                               | 6.726087801                                |
| 33.08092003                                | 438.1716418                                    | 0.052681246                                               | 6.740487751                                |
| 18.19106511                                | 229.7602686                                    | 0.072794923                                               | 6.942205866                                |
| 18.01644148                                | 210.4187958                                    | 0.066595831                                               | 6.847067726                                |
| 23.54883285                                | 194.4706907                                    | 0.058966817                                               | 6.86392094                                 |
| 14.50857566                                | 187.8524342                                    | 0.072094829                                               | 6.718655134                                |
| 44.1087393                                 | 352.2260906                                    | 0.041582798                                               | 6.964025267                                |
| 28.43022758                                | 213.3658238                                    | 0.051239924                                               | 6.761781359                                |
| 25.53338301                                | 281.942492                                     | 0.061988997                                               | 6.066839094                                |
| 17.59649978                                | 196.9365672                                    | 0.078107596                                               | 5.766110892                                |
| 26.86188722                                | 327.8041704                                    | 0.054627221                                               | 7.162016156                                |

| log.sigma.4.5.mm.3D_gldm_DependenceNonUniformity | log.sigma.4.5.mm.3D_gldm_GrayLevelNonUniformity | log.sigma.4.5.mm.3D_gldm_SmallDependenceEmphasis |
|--------------------------------------------------|-------------------------------------------------|--------------------------------------------------|
| 312.2243767                                      | 65.82825485                                     | 0.323277332                                      |
| 95.11527378                                      | 16.8443804                                      | 0.369058173                                      |
| 199.6278027                                      | 41.33408072                                     | 0.330623707                                      |
| 99                                               | 14.2173913                                      | 0.382770876                                      |
| 332.4613749                                      | 70.71226081                                     | 0.267845509                                      |
| 64.78512397                                      | 11.50413223                                     | 0.389940312                                      |
| 1044.076193                                      | 913.7581364                                     | 0.153993804                                      |
| 973.9258405                                      | 343.0128543                                     | 0.248826603                                      |
| 577.9784139                                      | 293.5598311                                     | 0.201668201                                      |
| 150.8860927                                      | 43.28874172                                     | 0.253535567                                      |
| 220.3496144                                      | 144.9447301                                     | 0.164530324                                      |
| 423.1937188                                      | 261.3668917                                     | 0.183331984                                      |
| 186.9334155                                      | 38.69913687                                     | 0.309273797                                      |
| 172.4720497                                      | 28.13975155                                     | 0.396368387                                      |
| 284.4463492                                      | 89.97269841                                     | 0.288430121                                      |
| 719.1863936                                      | 369.0329747                                     | 0.206153671                                      |
| 144.997735                                       | 66.36579841                                     | 0.186184312                                      |
| 101.8997555                                      | 18.72616137                                     | 0.344104863                                      |
| 144.3053016                                      | 100.1115174                                     | 0.173032785                                      |
| 1459.348252                                      | 563.9911794                                     | 0.220509442                                      |
| 419.6236766                                      | 108.3099134                                     | 0.252059612                                      |
| 121.7943548                                      | 29.0766129                                      | 0.260055269                                      |
| 124.1290323                                      | 31.00716846                                     | 0.254297001                                      |
| 385.7111482                                      | 373.1884904                                     | 0.143218091                                      |
| 200.3355049                                      | 61.28013029                                     | 0.272636043                                      |
| 451.1494523                                      | 133.4733959                                     | 0.25747585                                       |
| 399.4600798                                      | 102.3692615                                     | 0.308219944                                      |
| 368.6493564                                      | 147.5068797                                     | 0.207738341                                      |
| 20.61643836                                      | 13.60273973                                     | 0.185412562                                      |
| 317.2720497                                      | 99.39875776                                     | 0.241178203                                      |
| 679.138688                                       | 223.4295335                                     | 0.227988333                                      |
| 187.3502538                                      | 38.58883249                                     | 0.343841433                                      |
| 388.5426124                                      | 131.6415418                                     | 0.240694053                                      |
| 365.6973085                                      | 151.7552795                                     | 0.220895841                                      |
| 787.2252094                                      | 313.0564972                                     | 0.227825866                                      |
| 394.9504899                                      | 96.2790098                                      | 0.295295031                                      |
| 353.5965608                                      | 70.85846561                                     | 0.334668698                                      |
| 656.7134513                                      | 431.8204776                                     | 0.219368626                                      |
| 125.0035714                                      | 39.13571429                                     | 0.202434237                                      |
| 1085.812745                                      | 724.7925267                                     | 0.162289772                                      |
| 281.3029851                                      | 66.12238806                                     | 0.276366841                                      |
| 566.3684767                                      | 651.3991537                                     | 0.123697981                                      |
| 529.4830438                                      | 105.5550041                                     | 0.338461312                                      |
| 315.7169014                                      | 69.72394366                                     | 0.294798459                                      |
| 183.5745501                                      | 132.3688946                                     | 0.163398721                                      |
| 485.4056643                                      | 120.7709288                                     | 0.292813586                                      |
| 764.7772379                                      | 360.96225                                       | 0.198609196                                      |
| 94.41344196                                      | 36.7107943                                      | 0.243584347                                      |
| 83.18414322                                      | 22.03324808                                     | 0.260561819                                      |
| 135.5132743                                      | 24.15044248                                     | 0.316142453                                      |
| 257.8142968                                      | 68.66588967                                     | 0.30584185                                       |
| 546.2007181                                      | 144.0262118                                     | 0.282276681                                      |
| 614.3252257                                      | 949.4252758                                     | 0.117907466                                      |
| 238.3520097                                      | 115.183922                                      | 0.215864863                                      |
| 175.8522551                                      | 26.41835148                                     | 0.409882266                                      |
| 276.3979592                                      | 56.19557823                                     | 0.296257619                                      |
| 590.4864259                                      | 247.8184309                                     | 0.215790836                                      |
| 422.7261732                                      | 106.7880987                                     | 0.274620265                                      |
| 159.9174312                                      | 43.08650066                                     | 0.292853876                                      |
| 1004.001928                                      | 1004.255485                                     | 0.143012273                                      |
| 257.4078254                                      | 76.31527464                                     | 0.293015938                                      |
| 530.3590264                                      | 115.8154158                                     | 0.302591242                                      |
| 1341.342968                                      | 425.5533155                                     | 0.246299551                                      |
| 397.8187023                                      | 108.2900763                                     | 0.262376198                                      |
| 143.2776957                                      | 40.92319055                                     | 0.278307102                                      |
| 712.1487869                                      | 172.6615025                                     | 0.283666353                                      |
| 110.4187192                                      | 22.43842365                                     | 0.341464149                                      |
| 877.9262537                                      | 293.8196657                                     | 0.25206247                                       |
| 1017.171018                                      | 518.4176878                                     | 0.169461744                                      |
| 428.2900188                                      | 119.1393597                                     | 0.240098208                                      |
| 111.8902439                                      | 26.18699187                                     | 0.3169924                                        |
| 799.5721743                                      | 299.3453122                                     | 0.236455768                                      |
| 314.2928839                                      | 63.25617978                                     | 0.299642018                                      |
| 204.64                                           | 57.13894737                                     | 0.302875269                                      |
| 484.2012733                                      | 308.1865818                                     | 0.183534703                                      |
| 184.1546841                                      | 64.51633987                                     | 0.225638442                                      |
| 415.9488456                                      | 122.5246718                                     | 0.242535594                                      |
| 89.90402477                                      | 16.3993808                                      | 0.388158298                                      |
| 277.5155894                                      | 72.18022814                                     | 0.267514763                                      |
| 262.4077778                                      | 132.8677778                                     | 0.191951142                                      |
| 302.197724                                       | 64.75248933                                     | 0.321488044                                      |
| 182.2784504                                      | 46.15738499                                     | 0.295379706                                      |
| 403.4750219                                      | 130.1945662                                     | 0.271156738                                      |
| 318.1621764                                      | 134.6133122                                     | 0.192498962                                      |
| 381.6069982                                      | 179.7093923                                     | 0.206407008                                      |
| 120.2429379                                      | 37.47457627                                     | 0.281620931                                      |
| 245.3073394                                      | 72.92507645                                     | 0.27358692                                       |
| 408.9077164                                      | 301.6220021                                     | 0.185744801                                      |
| 272.196943                                       | 115.9300412                                     | 0.235765035                                      |
| 292.9180688                                      | 68.74103877                                     | 0.258395947                                      |
| 149.1766169                                      | 42.35572139                                     | 0.282019186                                      |
| 331.7827804                                      | 184.3167457                                     | 0.19008836                                       |
| 732.0233281                                      | 299.7478338                                     | 0.205074087                                      |
| 617.1857226                                      | 203.1996518                                     | 0.226798642                                      |
| 514.9824614                                      | 238.417599                                      | 0.184084433                                      |
| 539.1090604                                      | 99.13338926                                     | 0.325225176                                      |
| 505.4763458                                      | 125.6402936                                     | 0.260865232                                      |
| 73.07667732                                      | 19.40255591                                     | 0.287152112                                      |
| 62.62686567                                      | 20.93283582                                     | 0.273110489                                      |
| 1490.014733                                      | 482.0305984                                     | 0.24385597                                       |

| log.sigma.4.5.mm.3D_gldm_DependenceNonUniformityNormalized | log.sigma.4.5.mm.3D_gldm_DependenceVariance | log.sigma.4.5.mm.3D_gldm_LargeDependenceEmphasis |
|------------------------------------------------------------|---------------------------------------------|--------------------------------------------------|
| 0.216221868                                                | 2.215889995                                 | 9.675900277                                      |
| 0.274107417                                                | 1.442417095                                 | 7.040345821                                      |
| 0.223797985                                                | 1.755338937                                 | 8.719730942                                      |
| 0.307453416                                                | 0.948072991                                 | 5.782608696                                      |
| 0.235621102                                                | 1.676568784                                 | 9.422395464                                      |
| 0.267707124                                                | 1.303189673                                 | 6.619834711                                      |
| 0.099067862                                                | 23.4392058                                  | 58.25021349                                      |
| 0.160501951                                                | 7.64142976                                  | 21.10118655                                      |
| 0.135612016                                                | 10.97509602                                 | 29.83294228                                      |
| 0.199849129                                                | 2.436338757                                 | 11.78940397                                      |
| 0.141612863                                                | 5.603604258                                 | 22.98971722                                      |
| 0.124213008                                                | 11.41471404                                 | 33.01115351                                      |
| 0.23049743                                                 | 1.936082321                                 | 9.194821208                                      |
| 0.267813742                                                | 1.327823001                                 | 6.580745342                                      |
| 0.180600857                                                | 5.398624943                                 | 16.16952381                                      |
| 0.12481541                                                 | 15.50083908                                 | 37.66365845                                      |
| 0.164210345                                                | 3.991458133                                 | 17.93318233                                      |
| 0.249143656                                                | 1.235944309                                 | 7.273838631                                      |
| 0.131906126                                                | 7.263815594                                 | 26.17915905                                      |
| 0.158918464                                                | 5.735056098                                 | 19.46368289                                      |
| 0.201936322                                                | 2.248758477                                 | 11.48123195                                      |
| 0.245553135                                                | 1.606594693                                 | 9.258064516                                      |
| 0.222453463                                                | 1.701699618                                 | 10.06810036                                      |
| 0.107231345                                                | 13.18559183                                 | 40.94328607                                      |
| 0.163139662                                                | 9.292435464                                 | 22.73289902                                      |
| 0.176506045                                                | 4.626085849                                 | 15.87323944                                      |
| 0.199331377                                                | 2.675645715                                 | 11.05788423                                      |
| 0.16362599                                                 | 4.947677989                                 | 18.46382601                                      |
| 0.141208482                                                | 4.709326328                                 | 21.15068493                                      |
| 0.197063385                                                | 2.32123915                                  | 11.98136646                                      |
| 0.169403514                                                | 5.320307308                                 | 17.97430781                                      |
| 0.237754129                                                | 1.594250045                                 | 7.997461929                                      |
| 0.166399406                                                | 4.946944413                                 | 17.31263383                                      |
| 0.151427457                                                | 6.410734497                                 | 20.99585921                                      |
| 0.153365519                                                | 6.22000662                                  | 20.26826417                                      |
| 0.20368772                                                 | 3.726658973                                 | 12.71428571                                      |
| 0.233860159                                                | 1.514975435                                 | 8.066137566                                      |
| 0.112817978                                                | 23.70133267                                 | 52.30664834                                      |
| 0.223220663                                                | 2.117295918                                 | 11.95                                            |
| 0.114937308                                                | 12.05777242                                 | 36.12247274                                      |
| 0.209927601                                                | 2.293203386                                 | 10.75522388                                      |
| 0.099853399                                                | 15.76595793                                 | 48.34767278                                      |
| 0.218975618                                                | 2.384781632                                 | 9.660049628                                      |
| 0.222335846                                                | 1.846290419                                 | 9.428169014                                      |
| 0.117978503                                                | 12.22985739                                 | 35.89845758                                      |
| 0.202168123                                                | 3.714918173                                 | 12.8000833                                       |
| 0.142922302                                                | 6.749092426                                 | 22.98467576                                      |
| 0.192288069                                                | 2.766406312                                 | 12.79633401                                      |
| 0.212747169                                                | 1.87135092                                  | 10.4168798                                       |
| 0.299808129                                                | 0.890594408                                 | 6.557522124                                      |
| 0.200321909                                                | 3.142507497                                 | 11.82828283                                      |
| 0.19612234                                                 | 2.682892773                                 | 11.63985637                                      |
| 0.077021718                                                | 24.40541805                                 | 72.1948345                                       |
| 0.145159567                                                | 5.184877478                                 | 19.84043849                                      |
| 0.273487177                                                | 1.218568675                                 | 6.213063764                                      |
| 0.235032278                                                | 1.646536165                                 | 8.848639456                                      |
| 0.147070094                                                | 7.682981224                                 | 23.37957659                                      |
| 0.204511937                                                | 2.322592756                                 | 10.97194001                                      |
| 0.209590342                                                | 2.230091262                                 | 10.37090433                                      |
| 0.09216946                                                 | 27.58714255                                 | 67.25759662                                      |
| 0.193685346                                                | 3.62324394                                  | 12.89616253                                      |
| 0.215155792                                                | 3.615418455                                 | 12.0831643                                       |
| 0.162902959                                                | 6.145272636                                 | 19.03157639                                      |
| 0.189798999                                                | 3.171339629                                 | 12.98473282                                      |
| 0.211636183                                                | 2.725465768                                 | 11.33973412                                      |
| 0.208169771                                                | 2.244554991                                 | 10.56679334                                      |
| 0.271967289                                                | 1.039554466                                 | 6.724137931                                      |
| 0.172650197                                                | 3.742805889                                 | 14.8159292                                       |
| 0.135478292                                                | 6.321796406                                 | 24.34017048                                      |
| 0.201643135                                                | 2.516089105                                 | 12.26553672                                      |
| 0.227419195                                                | 1.686727477                                 | 8.711382114                                      |
| 0.160524428                                                | 6.85065703                                  | 20.73940976                                      |
| 0.235425381                                                | 1.684482038                                 | 8.863670412                                      |
| 0.215410526                                                | 1.896970637                                 | 9.549473684                                      |
| 0.118560547                                                | 10.43288157                                 | 32.04946131                                      |
| 0.200604231                                                | 2.173480285                                 | 12.09803922                                      |
| 0.18829735                                                 | 2.622957525                                 | 12.75373472                                      |
| 0.278340634                                                | 1.193704531                                 | 6.343653251                                      |
| 0.211038471                                                | 1.960689904                                 | 10.40380228                                      |
| 0.145782099                                                | 5.170369136                                 | 20.73777778                                      |
| 0.21493437                                                 | 2.238850365                                 | 9.768136558                                      |
| 0.22067609                                                 | 1.925467113                                 | 9.571428571                                      |
| 0.176807634                                                | 7.386276472                                 | 19.31025416                                      |
| 0.168072993                                                | 4.068455279                                 | 17.40464871                                      |
| 0.140555064                                                | 7.888621498                                 | 24.60662983                                      |
| 0.226446211                                                | 1.764371668                                 | 9.459510358                                      |
| 0.187543837                                                | 2.798737948                                 | 12.31039755                                      |
| 0.106597423                                                | 17.3580902                                  | 45.43482795                                      |
| 0.160021718                                                | 4.855786668                                 | 17.63609641                                      |
| 0.214278031                                                | 1.821116301                                 | 10.30212143                                      |
| 0.185543056                                                | 3.329038885                                 | 13.12189055                                      |
| 0.131035853                                                | 6.992409325                                 | 24.8507109                                       |
| 0.162635709                                                | 3.831307477                                 | 17.04754499                                      |
| 0.179102067                                                | 3.128459688                                 | 14.29251306                                      |
| 0.155724966                                                | 3.873971597                                 | 18.2827336                                       |
| 0.226136351                                                | 1.804439412                                 | 8.801174497                                      |
| 0.206148591                                                | 2.068101014                                 | 10.8588907                                       |
| 0.233471813                                                | 1.565883085                                 | 8.923322684                                      |
| 0.233682335                                                | 1.484127868                                 | 9.067164179                                      |
| 0.168859331                                                | 5.372964732                                 | 17.69605621                                      |

|                                                              |                                                               |                                                               |
|--------------------------------------------------------------|---------------------------------------------------------------|---------------------------------------------------------------|
| log.sigma.4.5.mm.3D_gldm_LargeDependenceLowGrayLevelEmphasis | log.sigma.4.5.mm.3D_gldm_SmallDependenceHighGrayLevelEmphasis | log.sigma.4.5.mm.3D_gldm_LargeDependenceHighGrayLevelEmphasis |
| 0.08188392                                                   | 108.2310732                                                   | 2308.819252                                                   |
| 0.067002455                                                  | 124.0619052                                                   | 2687.510086                                                   |
| 0.056729749                                                  | 109.5598536                                                   | 2777.535874                                                   |
| 0.072448548                                                  | 151.7754848                                                   | 1768.580745                                                   |
| 0.161580554                                                  | 57.7830701                                                    | 1941.689582                                                   |
| 0.067781872                                                  | 120.3595742                                                   | 1956.909091                                                   |
| 0.575580534                                                  | 27.54730215                                                   | 7546.689155                                                   |
| 0.126519591                                                  | 79.08429216                                                   | 4811.528675                                                   |
| 0.363876435                                                  | 45.92524891                                                   | 3804.643829                                                   |
| 0.240253551                                                  | 47.47326071                                                   | 1441.124503                                                   |
| 0.422426301                                                  | 19.1418051                                                    | 1853.854113                                                   |
| 0.406304691                                                  | 35.08310991                                                   | 4142.669797                                                   |
| 0.122032236                                                  | 82.16510842                                                   | 2905.993835                                                   |
| 0.195651695                                                  | 131.8494111                                                   | 1809.395963                                                   |
| 0.271883478                                                  | 64.72325206                                                   | 1849.746667                                                   |
| 0.370936391                                                  | 44.04132614                                                   | 5892.558834                                                   |
| 0.447159155                                                  | 23.61097375                                                   | 1507.157418                                                   |
| 0.128241758                                                  | 117.4955318                                                   | 2125.584352                                                   |
| 0.48882558                                                   | 23.13925836                                                   | 2188.155393                                                   |
| 0.043415335                                                  | 119.1569226                                                   | 9706.175868                                                   |
| 0.184800873                                                  | 54.5000952                                                    | 2304.660731                                                   |
| 0.332276926                                                  | 67.35196298                                                   | 2182.066532                                                   |
| 0.241191845                                                  | 56.05607919                                                   | 1845.136201                                                   |
| 0.463094925                                                  | 24.3436324                                                    | 4812.320267                                                   |
| 0.097160983                                                  | 103.3148043                                                   | 7566.557818                                                   |
| 0.076326658                                                  | 102.2585126                                                   | 4433.248044                                                   |
| 0.107223345                                                  | 99.67548505                                                   | 2196.794411                                                   |
| 0.236215277                                                  | 41.34711506                                                   | 2475.774523                                                   |
| 0.378685446                                                  | 21.77736582                                                   | 1655.342466                                                   |
| 0.160620228                                                  | 49.46263641                                                   | 1895.220497                                                   |
| 0.205037622                                                  | 53.14150246                                                   | 2829.890995                                                   |
| 0.048278235                                                  | 118.0295668                                                   | 2699.59264                                                    |
| 0.181453229                                                  | 60.74343758                                                   | 2895.176017                                                   |
| 0.157684979                                                  | 52.52934076                                                   | 4170.294824                                                   |
| 0.218196353                                                  | 54.53244592                                                   | 2976.583479                                                   |
| 0.100866695                                                  | 88.62605523                                                   | 3620.431666                                                   |
| 0.052307717                                                  | 142.4419531                                                   | 3083.853175                                                   |
| 0.322146303                                                  | 57.90220786                                                   | 11075.88954                                                   |
| 0.491605685                                                  | 32.51809315                                                   | 1778.230357                                                   |
| 0.100852157                                                  | 77.6727436                                                    | 14118.29353                                                   |
| 0.20191033                                                   | 68.69313335                                                   | 1727.935075                                                   |
| 0.422183374                                                  | 23.07135588                                                   | 6461.550423                                                   |
| 0.078111321                                                  | 119.7197863                                                   | 2726.425972                                                   |
| 0.155774897                                                  | 74.14981261                                                   | 1674.432394                                                   |
| 0.329603387                                                  | 33.94660466                                                   | 5357.557841                                                   |
| 0.144410573                                                  | 82.14876935                                                   | 2309.937943                                                   |
| 0.133621153                                                  | 59.1980518                                                    | 5085.814801                                                   |
| 0.424376255                                                  | 35.57965567                                                   | 1580.236253                                                   |
| 0.569086382                                                  | 54.43657018                                                   | 1408.925831                                                   |
| 0.055013599                                                  | 90.7789104                                                    | 1845.918142                                                   |
| 0.334796391                                                  | 69.55094136                                                   | 1252.336441                                                   |
| 0.068932889                                                  | 97.33883264                                                   | 3198.14219                                                    |
| 0.820401297                                                  | 18.16715505                                                   | 7794.455491                                                   |
| 0.10520245                                                   | 62.65214164                                                   | 4727.415347                                                   |
| 0.067985672                                                  | 163.2960865                                                   | 2466.339036                                                   |
| 0.230910502                                                  | 62.26041032                                                   | 1473.946429                                                   |
| 0.237422067                                                  | 50.12941924                                                   | 3704.640349                                                   |
| 0.083083313                                                  | 81.3895076                                                    | 2540.49492                                                    |
| 0.145206796                                                  | 74.42786914                                                   | 1950.618611                                                   |
| 0.346193329                                                  | 38.29688598                                                   | 14500.84449                                                   |
| 0.120678496                                                  | 71.6243892                                                    | 2249.908954                                                   |
| 0.051559539                                                  | 113.3919137                                                   | 4070.36998                                                    |
| 0.072651719                                                  | 105.9542024                                                   | 6312.0436                                                     |
| 0.08940528                                                   | 84.57182633                                                   | 3756.082538                                                   |
| 0.206637319                                                  | 49.92834802                                                   | 1408.45938                                                    |
| 0.054714585                                                  | 108.5079142                                                   | 3568.066647                                                   |
| 0.054705964                                                  | 109.497552                                                    | 2075.800493                                                   |
| 0.122006043                                                  | 78.679211                                                     | 3065.088102                                                   |
| 0.208341353                                                  | 37.30046113                                                   | 4297.961375                                                   |
| 0.074123583                                                  | 59.72120428                                                   | 3233.448682                                                   |
| 0.353258861                                                  | 59.82680317                                                   | 1117.140244                                                   |
| 0.182046082                                                  | 62.91184988                                                   | 4107.537041                                                   |
| 0.156076102                                                  | 76.26768206                                                   | 1518.8397                                                     |
| 0.193519375                                                  | 51.54923624                                                   | 1128.890526                                                   |
| 0.233082154                                                  | 52.84297203                                                   | 6037.773262                                                   |
| 0.261951328                                                  | 30.37976652                                                   | 1383.851852                                                   |
| 0.118227315                                                  | 63.11961182                                                   | 3321.37483                                                    |
| 0.027919214                                                  | 183.0225897                                                   | 3333.312693                                                   |
| 0.095277037                                                  | 63.29643472                                                   | 2207.945247                                                   |
| 0.246185762                                                  | 35.66735042                                                   | 2741.02                                                       |
| 0.083826949                                                  | 105.2608386                                                   | 2305.175676                                                   |
| 0.067774527                                                  | 72.60697873                                                   | 2726.986683                                                   |
| 0.385614688                                                  | 54.59577465                                                   | 2775.410167                                                   |
| 0.275002784                                                  | 35.53998017                                                   | 1970.824089                                                   |
| 0.22352749                                                   | 48.9249541                                                    | 4025.436464                                                   |
| 0.027940805                                                  | 121.6013102                                                   | 4856.397363                                                   |
| 0.154972661                                                  | 65.95177739                                                   | 2328.284404                                                   |
| 0.611682371                                                  | 38.67197365                                                   | 5494.58342                                                    |
| 0.138333473                                                  | 56.61922928                                                   | 3042.360964                                                   |
| 0.109441439                                                  | 70.09572856                                                   | 2266.08632                                                    |
| 0.049877405                                                  | 129.0808491                                                   | 5611.014925                                                   |
| 0.161779297                                                  | 55.88767886                                                   | 5188.446682                                                   |
| 0.132786454                                                  | 50.19874899                                                   | 3179.119085                                                   |
| 0.161947466                                                  | 51.36700135                                                   | 2329.972142                                                   |
| 0.15786052                                                   | 38.29751328                                                   | 2974.774116                                                   |
| 0.065283297                                                  | 125.7984415                                                   | 2911.303272                                                   |
| 0.118640461                                                  | 59.68023085                                                   | 2120.550163                                                   |
| 0.075193102                                                  | 80.1510836                                                    | 2484.977636                                                   |
| 0.096998919                                                  | 49.93945896                                                   | 1883.966418                                                   |
| 0.075188208                                                  | 79.88361744                                                   | 5593.614687                                                   |

| log.sigma.4.5.mm.3D_gldm_SmallDependenceLowGrayLevelEmphasis | log.sigma.4.5.mm.3D_gldm_LowGrayLevelEmphasis | log.sigma.4.5.mm.3D_gldm_DistanceZoneVariabilityNormalized |
|--------------------------------------------------------------|-----------------------------------------------|------------------------------------------------------------|
| 0.003198759                                                  | 0.009641512                                   | 0.888340407                                                |
| 0.004176661                                                  | 0.013401322                                   | 0.916824197                                                |
| 0.003450714                                                  | 0.008141539                                   | 0.8872                                                     |
| 0.00482622                                                   | 0.015372401                                   | 0.892565294                                                |
| 0.003938694                                                  | 0.017935812                                   | 0.834710744                                                |
| 0.00707709                                                   | 0.012827628                                   | 0.856866825                                                |
| 0.002428332                                                  | 0.015110802                                   | 0.945008294                                                |
| 0.001730341                                                  | 0.006930971                                   | 0.914163887                                                |
| 0.002371994                                                  | 0.013530896                                   | 0.987792932                                                |
| 0.004675835                                                  | 0.020399915                                   | 0.940481687                                                |
| 0.004914071                                                  | 0.021585718                                   | 0.959062269                                                |
| 0.003409021                                                  | 0.015302204                                   | 0.925934217                                                |
| 0.008612737                                                  | 0.019021044                                   | 0.870993004                                                |
| 0.00543859                                                   | 0.017952401                                   | 0.785486089                                                |
| 0.003601454                                                  | 0.015559511                                   | 0.938689665                                                |
| 0.002775997                                                  | 0.013123205                                   | 0.965478286                                                |
| 0.003886736                                                  | 0.027385485                                   | 0.967222222                                                |
| 0.005482437                                                  | 0.015450682                                   | 0.880918173                                                |
| 0.0044592                                                    | 0.023160139                                   | 0.951952243                                                |
| 0.000661545                                                  | 0.002456597                                   | 0.953297772                                                |
| 0.00340309                                                   | 0.014577913                                   | 0.954422222                                                |
| 0.003381103                                                  | 0.019673189                                   | 0.899163195                                                |
| 0.003773722                                                  | 0.021765917                                   | 0.916390457                                                |
| 0.001848253                                                  | 0.013373419                                   | 0.960589421                                                |
| 0.002242815                                                  | 0.007328454                                   | 0.961180276                                                |
| 0.001533795                                                  | 0.005180869                                   | 0.952822615                                                |
| 0.002867137                                                  | 0.010265003                                   | 0.922894238                                                |
| 0.00296564                                                   | 0.013848457                                   | 0.963112669                                                |
| 0.01069373                                                   | 0.023106277                                   | 1                                                          |
| 0.003133109                                                  | 0.01244968                                    | 0.982341357                                                |
| 0.00227281                                                   | 0.011177824                                   | 0.9608                                                     |
| 0.004153103                                                  | 0.00829059                                    | 0.898024311                                                |
| 0.002530841                                                  | 0.011114955                                   | 0.873466964                                                |
| 0.002155774                                                  | 0.008658771                                   | 0.974280894                                                |
| 0.002369956                                                  | 0.010807832                                   | 0.936894199                                                |
| 0.003597189                                                  | 0.010692407                                   | 0.7888                                                     |
| 0.002351843                                                  | 0.006615635                                   | 0.703046905                                                |
| 0.002188584                                                  | 0.009431971                                   | 0.947059096                                                |
| 0.003475805                                                  | 0.027918134                                   | 0.892963131                                                |
| 0.000562852                                                  | 0.003055197                                   | 0.94375772                                                 |
| 0.002766237                                                  | 0.015305016                                   | 0.895498864                                                |
| 0.001397683                                                  | 0.01028491                                    | 0.935208015                                                |
| 0.002436467                                                  | 0.008261482                                   | 0.934598817                                                |
| 0.003024002                                                  | 0.0133034                                     | 0.927028179                                                |
| 0.002388761                                                  | 0.012263615                                   | 0.902221278                                                |
| 0.002606489                                                  | 0.010168989                                   | 0.928995689                                                |
| 0.001243011                                                  | 0.006043028                                   | 0.954010728                                                |
| 0.007307837                                                  | 0.027679533                                   | 1                                                          |
| 0.005829678                                                  | 0.035736247                                   | 0.953152                                                   |
| 0.005189793                                                  | 0.010828775                                   | 0.936239585                                                |
| 0.003358359                                                  | 0.019474391                                   | 0.970656406                                                |
| 0.002179479                                                  | 0.00716557                                    | 0.901902497                                                |
| 0.001889606                                                  | 0.016563546                                   | 0.944061875                                                |
| 0.001811397                                                  | 0.00607358                                    | 0.94194066                                                 |
| 0.004222655                                                  | 0.01161878                                    | 0.90328208                                                 |
| 0.005156611                                                  | 0.01954643                                    | 0.93838843                                                 |
| 0.002037373                                                  | 0.010769839                                   | 0.958882                                                   |
| 0.00221191                                                   | 0.007305382                                   | 0.936268996                                                |
| 0.003196655                                                  | 0.013416411                                   | 0.834168043                                                |
| 0.001083881                                                  | 0.006643376                                   | 0.957368955                                                |
| 0.003007612                                                  | 0.010686017                                   | 0.953710241                                                |
| 0.002422687                                                  | 0.005614905                                   | 0.907586899                                                |
| 0.001156338                                                  | 0.004046666                                   | 0.869763942                                                |
| 0.002238296                                                  | 0.008317809                                   | 0.829687014                                                |
| 0.005824022                                                  | 0.019466141                                   | 0.940227833                                                |
| 0.00150036                                                   | 0.00553069                                    | 0.870920025                                                |
| 0.005271921                                                  | 0.010275087                                   | 0.838240958                                                |
| 0.00171683                                                   | 0.007883715                                   | 0.880613486                                                |
| 0.00149971                                                   | 0.009015681                                   | 0.956267478                                                |
| 0.002375897                                                  | 0.007493402                                   | 0.92697339                                                 |
| 0.010084822                                                  | 0.041075253                                   | 0.937887844                                                |
| 0.002468378                                                  | 0.010956004                                   | 0.937216994                                                |
| 0.003923967                                                  | 0.015782771                                   | 0.951642647                                                |
| 0.006918784                                                  | 0.019739525                                   | 0.988372491                                                |
| 0.001379655                                                  | 0.008909239                                   | 0.812825122                                                |
| 0.003930606                                                  | 0.021117399                                   | 0.968262227                                                |
| 0.00256292                                                   | 0.009626608                                   | 0.932286857                                                |
| 0.005894665                                                  | 0.008312219                                   | 0.804703434                                                |
| 0.005509448                                                  | 0.012949817                                   | 0.936861895                                                |
| 0.003374025                                                  | 0.013769808                                   | 0.954339686                                                |
| 0.003227391                                                  | 0.009862366                                   | 0.900980174                                                |
| 0.004052783                                                  | 0.009553328                                   | 0.954273442                                                |
| 0.003343013                                                  | 0.020389761                                   | 0.970751128                                                |
| 0.002916401                                                  | 0.016374411                                   | 0.958448291                                                |
| 0.002233585                                                  | 0.010546729                                   | 0.900277008                                                |
| 0.003400524                                                  | 0.005779634                                   | 0.907436085                                                |
| 0.003552135                                                  | 0.012908736                                   | 0.896936277                                                |
| 0.002734425                                                  | 0.018714545                                   | 0.975731818                                                |
| 0.002678006                                                  | 0.009390896                                   | 0.940733396                                                |
| 0.003125292                                                  | 0.010816007                                   | 0.972608025                                                |
| 0.002583214                                                  | 0.00538119                                    | 0.782661541                                                |
| 0.001396497                                                  | 0.007780231                                   | 0.938356549                                                |
| 0.001612154                                                  | 0.007905696                                   | 0.931449888                                                |
| 0.002589734                                                  | 0.011404049                                   | 0.95083343                                                 |
| 0.001771355                                                  | 0.00819589                                    | 0.937003786                                                |
| 0.002136298                                                  | 0.007614967                                   | 0.835198127                                                |
| 0.003334259                                                  | 0.011506428                                   | 0.866707797                                                |
| 0.005424003                                                  | 0.01183176                                    | 0.868431357                                                |
| 0.006699646                                                  | 0.0152158                                     | 0.878071834                                                |
| 0.001405056                                                  | 0.004922824                                   | 0.905322902                                                |

| log.sigma.4.5.mm.3D_gldzm_LowIntensityEmphasis | log.sigma.4.5.mm.3D_gldzm_LargeDistanceEmphasis | log.sigma.4.5.mm.3D_gldzm_HighIntensitySmallDistanceEmphasis |
|------------------------------------------------|-------------------------------------------------|--------------------------------------------------------------|
| 0.010703812                                    | 1.178057554                                     | 321.2598921                                                  |
| 0.014182547                                    | 1.130434783                                     | 328.7546584                                                  |
| 0.010040254                                    | 1.18                                            | 320.3735714                                                  |
| 0.015819044                                    | 1.170886076                                     | 378.528481                                                   |
| 0.016958493                                    | 1.272727273                                     | 208.2008457                                                  |
| 0.016606983                                    | 1.232758621                                     | 295.2543103                                                  |
| 0.01741479                                     | 1.084889643                                     | 185.0271647                                                  |
| 0.006979803                                    | 1.134812287                                     | 314.0489192                                                  |
| 0.011206492                                    | 1.018423746                                     | 236.154043                                                   |
| 0.021961373                                    | 1.092105263                                     | 188.9945175                                                  |
| 0.028740368                                    | 1.06271777                                      | 120.3832753                                                  |
| 0.018199265                                    | 1.115549215                                     | 192.6437233                                                  |
| 0.026944635                                    | 1.207920792                                     | 256.9521452                                                  |
| 0.015419051                                    | 1.366559486                                     | 320.6318328                                                  |
| 0.012804032                                    | 1.094972067                                     | 223.6615456                                                  |
| 0.013085415                                    | 1.052708638                                     | 215.715959                                                   |
| 0.024073078                                    | 1.05                                            | 132.7138889                                                  |
| 0.014862284                                    | 1.190751445                                     | 331.0245665                                                  |
| 0.027691514                                    | 1.073891626                                     | 139.6921182                                                  |
| 0.002959641                                    | 1.071770335                                     | 536.6780122                                                  |
| 0.013503233                                    | 1.07                                            | 218.9683333                                                  |
| 0.017371829                                    | 1.159763314                                     | 252.535503                                                   |
| 0.018972106                                    | 1.131147541                                     | 216.8196721                                                  |
| 0.012530833                                    | 1.060329068                                     | 181.8427788                                                  |
| 0.009170325                                    | 1.059405941                                     | 371.5965347                                                  |
| 0.005785585                                    | 1.072519084                                     | 395.8403308                                                  |
| 0.010293572                                    | 1.120498615                                     | 315.3753463                                                  |
| 0.014851923                                    | 1.056390977                                     | 204.1343985                                                  |
| 0.048648116                                    | 1                                               | 116.6857143                                                  |
| 0.012757787                                    | 1.026726058                                     | 212.6959911                                                  |
| 0.009914966                                    | 1.06                                            | 237.3952381                                                  |
| 0.011253714                                    | 1.161676647                                     | 333.616018                                                   |
| 0.010937219                                    | 1.20361991                                      | 247.0542986                                                  |
| 0.009586356                                    | 1.039087948                                     | 237.8831433                                                  |
| 0.010791955                                    | 1.097850259                                     | 242.773536                                                   |
| 0.012844857                                    | 1.36                                            | 285.3675                                                     |
| 0.00732284                                     | 1.544117647                                     | 397.4505719                                                  |
| 0.009785748                                    | 1.081632653                                     | 264.5215986                                                  |
| 0.020253157                                    | 1.170212766                                     | 162.6507092                                                  |
| 0.003414956                                    | 1.086879433                                     | 481.1422872                                                  |
| 0.011184102                                    | 1.165929204                                     | 246.1753319                                                  |
| 0.012739029                                    | 1.100558659                                     | 197.9752095                                                  |
| 0.007436851                                    | 1.101538462                                     | 353.0553846                                                  |
| 0.011516429                                    | 1.113772455                                     | 250.3178643                                                  |
| 0.013941151                                    | 1.154639175                                     | 216.6632302                                                  |
| 0.008955458                                    | 1.11058264                                      | 277.6495244                                                  |
| 0.006121243                                    | 1.070647603                                     | 303.0264929                                                  |
| 0.031000587                                    | 1                                               | 146.2649007                                                  |
| 0.026066776                                    | 1.072                                           | 205.324                                                      |
| 0.015314514                                    | 1.098901099                                     | 284.9656593                                                  |
| 0.013462286                                    | 1.044680851                                     | 227.6202128                                                  |
| 0.008431356                                    | 1.155172414                                     | 339.5689655                                                  |
| 0.017652442                                    | 1.086395233                                     | 160.9270109                                                  |
| 0.008059521                                    | 1.089775561                                     | 292.9326683                                                  |
| 0.011486063                                    | 1.152866242                                     | 391.9482484                                                  |
| 0.016887523                                    | 1.095454545                                     | 208.9585227                                                  |
| 0.009502527                                    | 1.063                                           | 237.902                                                      |
| 0.007787701                                    | 1.098853868                                     | 294.5272206                                                  |
| 0.012617284                                    | 1.273722628                                     | 243.3512774                                                  |
| 0.007834943                                    | 1.065371025                                     | 273.2446996                                                  |
| 0.011266265                                    | 1.07112069                                      | 241.1196121                                                  |
| 0.007560443                                    | 1.145695364                                     | 363.1272075                                                  |
| 0.004556009                                    | 1.210062893                                     | 419.5010482                                                  |
| 0.009442175                                    | 1.281972265                                     | 308.788906                                                   |
| 0.022146766                                    | 1.092511013                                     | 176.3127753                                                  |
| 0.005827609                                    | 1.208047945                                     | 368.7300942                                                  |
| 0.014061007                                    | 1.266272189                                     | 311.1745562                                                  |
| 0.007698532                                    | 1.191275168                                     | 306.6845638                                                  |
| 0.009305914                                    | 1.067099567                                     | 225.6769481                                                  |
| 0.009809235                                    | 1.113861386                                     | 246.390264                                                   |
| 0.037133208                                    | 1.096256684                                     | 185.9318182                                                  |
| 0.010962224                                    | 1.097332372                                     | 266.185292                                                   |
| 0.01375626                                     | 1.074380165                                     | 256.4380165                                                  |
| 0.022386274                                    | 1.01754386                                      | 170.4619883                                                  |
| 0.008481057                                    | 1.319254658                                     | 289.3937198                                                  |
| 0.020704251                                    | 1.048387097                                     | 138.2076613                                                  |
| 0.011323645                                    | 1.105263158                                     | 259.2567783                                                  |
| 0.012976441                                    | 1.329032258                                     | 459.6387097                                                  |
| 0.01964203                                     | 1.097902098                                     | 232.2074592                                                  |
| 0.018021322                                    | 1.07012987                                      | 189.0915584                                                  |
| 0.010974054                                    | 1.156716418                                     | 317.9472948                                                  |
| 0.012664795                                    | 1.070234114                                     | 242.5200669                                                  |
| 0.012507494                                    | 1.044534413                                     | 202.224359                                                   |
| 0.01611647                                     | 1.063679245                                     | 189.4563679                                                  |
| 0.010614965                                    | 1.157894737                                     | 239.2174923                                                  |
| 0.010807032                                    | 1.145945946                                     | 419.972973                                                   |
| 0.014165625                                    | 1.163507109                                     | 236.4887441                                                  |
| 0.014962617                                    | 1.036855037                                     | 216.6612408                                                  |
| 0.011818274                                    | 1.091703057                                     | 236.231441                                                   |
| 0.011850952                                    | 1.041666667                                     | 273.375                                                      |
| 0.008602012                                    | 1.372180451                                     | 425.3909774                                                  |
| 0.00807386                                     | 1.095505618                                     | 299.9382022                                                  |
| 0.008379903                                    | 1.106614018                                     | 247.3526654                                                  |
| 0.011846388                                    | 1.075657895                                     | 231.2916667                                                  |
| 0.009503038                                    | 1.097674419                                     | 216.0775194                                                  |
| 0.007515675                                    | 1.271834061                                     | 366.7259825                                                  |
| 0.013140045                                    | 1.2154047                                       | 220.1204308                                                  |
| 0.018054883                                    | 1.212389381                                     | 270.4668142                                                  |
| 0.023469828                                    | 1.195652174                                     | 177.9673913                                                  |
| 0.00577104                                     | 1.149461937                                     | 319.7364488                                                  |

| log.sigma.4.5.mm.3D_gldzm_LowIntensityLargeDistanceEmphasis | log.sigma.4.5.mm.3D_gldzm_HighIntensityEmphasis | log.sigma.4.5.mm.3D_gldzm_DistanceZoneVariability | log.sigma.4.5.mm.3D_gldzm_ZonePercentage |
|-------------------------------------------------------------|-------------------------------------------------|---------------------------------------------------|------------------------------------------|
| 0.012157207                                                 | 335.2158273                                     | 493.9172662                                       | 0.385041551                              |
| 0.014647679                                                 | 338.8819876                                     | 147.6086957                                       | 0.463976945                              |
| 0.01075849                                                  | 332.5942857                                     | 310.52                                            | 0.392376682                              |
| 0.016694927                                                 | 388.3734177                                     | 141.0253165                                       | 0.49068323                               |
| 0.01978956                                                  | 217.8794926                                     | 394.8181818                                       | 0.335223246                              |
| 0.017894444                                                 | 307.4482759                                     | 99.39655172                                       | 0.479338843                              |
| 0.018142245                                                 | 188.8947368                                     | 1669.829655                                       | 0.167662966                              |
| 0.008111674                                                 | 323.3441411                                     | 1607.100114                                       | 0.289716546                              |
| 0.011406451                                                 | 236.8433982                                     | 965.073695                                        | 0.229235101                              |
| 0.023026223                                                 | 191.5175439                                     | 214.4298246                                       | 0.301986755                              |
| 0.029574674                                                 | 122.087108                                      | 275.2508711                                       | 0.184447301                              |
| 0.019223105                                                 | 197.4550642                                     | 649.0798859                                       | 0.205752862                              |
| 0.028798746                                                 | 265.7491749                                     | 263.9108911                                       | 0.373612824                              |
| 0.032507049                                                 | 329.9742765                                     | 244.2861736                                       | 0.482919255                              |
| 0.019658531                                                 | 226.5344507                                     | 504.0763501                                       | 0.340952381                              |
| 0.013468858                                                 | 217.8967789                                     | 1318.843338                                       | 0.237070462                              |
| 0.025013767                                                 | 133.3888889                                     | 174.1                                             | 0.20385051                               |
| 0.017522831                                                 | 335.2427746                                     | 152.3988439                                       | 0.422982885                              |
| 0.028349135                                                 | 141.8719212                                     | 193.2463054                                       | 0.185557587                              |
| 0.003089555                                                 | 547.307525                                      | 2191.631579                                       | 0.250353915                              |
| 0.014165979                                                 | 221.3383333                                     | 572.6533333                                       | 0.288739172                              |
| 0.019178409                                                 | 257.7100592                                     | 151.9585799                                       | 0.340725806                              |
| 0.020255282                                                 | 220.7377049                                     | 167.6994536                                       | 0.327956989                              |
| 0.013141062                                                 | 183.8062157                                     | 525.4424132                                       | 0.15207117                               |
| 0.009659166                                                 | 375.1014851                                     | 388.3168317                                       | 0.328990228                              |
| 0.005984747                                                 | 404.0139949                                     | 748.9185751                                       | 0.307511737                              |
| 0.01149244                                                  | 321.9861496                                     | 666.3296399                                       | 0.360279441                              |
| 0.015499952                                                 | 205.7838346                                     | 512.3759398                                       | 0.236129605                              |
| 0.048648116                                                 | 116.6857143                                     | 35                                                | 0.239726027                              |
| 0.012953447                                                 | 213.674833                                      | 441.0712695                                       | 0.278881988                              |
| 0.010382859                                                 | 240.2638095                                     | 1008.84                                           | 0.261910701                              |
| 0.012289792                                                 | 341.3922156                                     | 299.9401198                                       | 0.423857868                              |
| 0.012356935                                                 | 257.3393665                                     | 579.1085973                                       | 0.283940043                              |
| 0.009796852                                                 | 239.7899023                                     | 598.2084691                                       | 0.254244306                              |
| 0.012971447                                                 | 246.0904374                                     | 1263.870274                                       | 0.262809273                              |
| 0.020735604                                                 | 299.5371429                                     | 552.16                                            | 0.361010883                              |
| 0.020517613                                                 | 419.0816993                                     | 430.2647059                                       | 0.404761905                              |
| 0.010819935                                                 | 268.314966                                      | 1392.176871                                       | 0.252533929                              |
| 0.024011184                                                 | 165.2624113                                     | 125.9078014                                       | 0.251785714                              |
| 0.003674705                                                 | 491.3031915                                     | 1596.838061                                       | 0.179104478                              |
| 0.012641431                                                 | 252.6283186                                     | 404.7654867                                       | 0.337313433                              |
| 0.014203526                                                 | 201.5167598                                     | 669.6089385                                       | 0.126234133                              |
| 0.0083264                                                   | 357.0369231                                     | 911.2338462                                       | 0.403225806                              |
| 0.012452966                                                 | 254.9061876                                     | 464.4411178                                       | 0.352816901                              |
| 0.015669778                                                 | 221.4570447                                     | 262.5463918                                       | 0.187017995                              |
| 0.010136546                                                 | 281.8953627                                     | 781.2853746                                       | 0.350270721                              |
| 0.00661974                                                  | 306.6534903                                     | 1134.318755                                       | 0.222201458                              |
| 0.031000587                                                 | 146.2649007                                     | 151                                               | 0.307535642                              |
| 0.026539867                                                 | 209.08                                          | 119.144                                           | 0.319693095                              |
| 0.015804676                                                 | 290.5494505                                     | 170.3956044                                       | 0.402654867                              |
| 0.013956683                                                 | 228.6893617                                     | 456.2085106                                       | 0.365190365                              |
| 0.009279998                                                 | 350.0204741                                     | 836.9655172                                       | 0.333213645                              |
| 0.018954555                                                 | 163.5888779                                     | 950.6703078                                       | 0.126253761                              |
| 0.008397117                                                 | 299.0897756                                     | 377.7182045                                       | 0.244214373                              |
| 0.013443917                                                 | 396.9808917                                     | 283.6305732                                       | 0.488335925                              |
| 0.018053603                                                 | 211.8477273                                     | 412.8909091                                       | 0.37414966                               |
| 0.010688456                                                 | 239.966                                         | 958.882                                           | 0.249066002                              |
| 0.008380332                                                 | 299.4484241                                     | 653.5157593                                       | 0.33768747                               |
| 0.015886212                                                 | 251.2372263                                     | 228.5620438                                       | 0.359108781                              |
| 0.008368688                                                 | 276.9310954                                     | 1625.612485                                       | 0.155879923                              |
| 0.011742251                                                 | 244.3362069                                     | 442.5215517                                       | 0.349134688                              |
| 0.008075314                                                 | 376.6412804                                     | 822.2737307                                       | 0.367545639                              |
| 0.005355784                                                 | 438.4343816                                     | 2074.387002                                       | 0.28965266                               |
| 0.011437671                                                 | 324.6209553                                     | 538.4668721                                       | 0.309637405                              |
| 0.023397291                                                 | 178.30837                                       | 213.4317181                                       | 0.335302806                              |
| 0.006961339                                                 | 383.0744863                                     | 1017.234589                                       | 0.341420637                              |
| 0.017236837                                                 | 320.1301775                                     | 141.6627219                                       | 0.416256158                              |
| 0.009059928                                                 | 318.3926174                                     | 1312.114094                                       | 0.293018682                              |
| 0.009760365                                                 | 229.1385281                                     | 1325.386724                                       | 0.18460309                               |
| 0.010333406                                                 | 253.5264026                                     | 561.7458746                                       | 0.285310734                              |
| 0.039533172                                                 | 187.6203209                                     | 175.3850267                                       | 0.380081301                              |
| 0.012116286                                                 | 269.9206921                                     | 1299.919971                                       | 0.278458141                              |
| 0.014672251                                                 | 258.446281                                      | 460.5950413                                       | 0.362546816                              |
| 0.022611055                                                 | 170.8216374                                     | 338.0233918                                       | 0.36                                     |
| 0.019886292                                                 | 302.3763975                                     | 654.3242236                                       | 0.197110676                              |
| 0.021361187                                                 | 139.3508065                                     | 240.1290323                                       | 0.270152505                              |
| 0.011822623                                                 | 266.1419458                                     | 584.5438596                                       | 0.283838841                              |
| 0.014497503                                                 | 480.4064516                                     | 124.7290323                                       | 0.479876161                              |
| 0.020405398                                                 | 236.3752914                                     | 401.9137529                                       | 0.326235741                              |
| 0.026342597                                                 | 191.3766234                                     | 367.4207792                                       | 0.213888889                              |
| 0.01241612                                                  | 329.1455224                                     | 482.9253731                                       | 0.381223329                              |
| 0.01310428                                                  | 245.826087                                      | 285.3277592                                       | 0.361985472                              |
| 0.012845071                                                 | 203.8448043                                     | 719.3265857                                       | 0.324715162                              |
| 0.017179882                                                 | 190.754717                                      | 406.3820755                                       | 0.223983096                              |
| 0.011846589                                                 | 247.0309598                                     | 581.5789474                                       | 0.237937385                              |
| 0.011315675                                                 | 431.1621622                                     | 167.8756757                                       | 0.348399247                              |
| 0.016427103                                                 | 241.8009479                                     | 378.507109                                        | 0.322629969                              |
| 0.015422111                                                 | 217.8046683                                     | 794.2457002                                       | 0.212200209                              |
| 0.012558501                                                 | 239.6113537                                     | 430.8558952                                       | 0.26925338                               |
| 0.012064191                                                 | 276.0763889                                     | 420.1666667                                       | 0.316020483                              |
| 0.009735918                                                 | 462.5639098                                     | 208.1879699                                       | 0.330845771                              |
| 0.017364635                                                 | 303.6067416                                     | 501.082397                                        | 0.210900474                              |
| 0.009131545                                                 | 252.2813425                                     | 943.5587364                                       | 0.225061098                              |
| 0.01244102                                                  | 234.4627193                                     | 867.1600877                                       | 0.264654672                              |
| 0.010677728                                                 | 219.8356589                                     | 604.3674419                                       | 0.195040822                              |
| 0.00959653                                                  | 385.040393                                      | 765.0414847                                       | 0.384228188                              |
| 0.01487139                                                  | 229.5522193                                     | 663.8981723                                       | 0.312398042                              |
| 0.019615582                                                 | 280.0707965                                     | 98.13274336                                       | 0.361022364                              |
| 0.025762494                                                 | 182.6630435                                     | 80.7826087                                        | 0.343283582                              |
| 0.006445486                                                 | 331.2279793                                     | 2271.455161                                       | 0.284338169                              |

| log.sigma.4.5.mm.3D_gldzm_IntensityVariabilityNormalized | log.sigma.4.5.mm.3D_gldzm_LowIntensitySmallDistanceEmphasis | log.sigma.4.5.mm.3D_gldzm_IntensityVariability |
|----------------------------------------------------------|-------------------------------------------------------------|------------------------------------------------|
| 0.042647896                                              | 0.010340464                                                 | 23.71223022                                    |
| 0.047413294                                              | 0.014066263                                                 | 7.633540373                                    |
| 0.045208163                                              | 0.009860695                                                 | 15.82285714                                    |
| 0.045265182                                              | 0.015600073                                                 | 7.151898734                                    |
| 0.049162156                                              | 0.016250726                                                 | 23.25369979                                    |
| 0.050832342                                              | 0.016285118                                                 | 5.896551724                                    |
| 0.050659949                                              | 0.017232926                                                 | 89.51612903                                    |
| 0.046110678                                              | 0.006696836                                                 | 81.0625711                                     |
| 0.052292806                                              | 0.011156502                                                 | 51.09007165                                    |
| 0.053631887                                              | 0.02169516                                                  | 12.22807018                                    |
| 0.067877478                                              | 0.028531792                                                 | 19.48083624                                    |
| 0.054857438                                              | 0.017943305                                                 | 38.45506419                                    |
| 0.042882506                                              | 0.026481107                                                 | 12.99339934                                    |
| 0.042296916                                              | 0.011147051                                                 | 13.15434084                                    |
| 0.054031467                                              | 0.011090407                                                 | 29.01489758                                    |
| 0.049320563                                              | 0.012989554                                                 | 67.37188873                                    |
| 0.069259259                                              | 0.023837906                                                 | 12.46666667                                    |
| 0.044137793                                              | 0.014197148                                                 | 7.63583815                                     |
| 0.068601519                                              | 0.027527109                                                 | 13.92610837                                    |
| 0.045244817                                              | 0.002927163                                                 | 104.0178338                                    |
| 0.051972222                                              | 0.013337546                                                 | 31.18333333                                    |
| 0.052064003                                              | 0.016920185                                                 | 8.798816568                                    |
| 0.050673355                                              | 0.018651312                                                 | 9.273224044                                    |
| 0.065135073                                              | 0.012378276                                                 | 35.62888483                                    |
| 0.042557102                                              | 0.009048114                                                 | 17.19306931                                    |
| 0.046649703                                              | 0.005735795                                                 | 36.66666667                                    |
| 0.046811335                                              | 0.009993855                                                 | 33.79778393                                    |
| 0.05863107                                               | 0.014689916                                                 | 31.19172932                                    |
| 0.071020408                                              | 0.048648116                                                 | 2.485714286                                    |
| 0.057097931                                              | 0.012708873                                                 | 25.63697105                                    |
| 0.05145034                                               | 0.009797993                                                 | 54.02285714                                    |
| 0.048155187                                              | 0.010994695                                                 | 16.08383234                                    |
| 0.049441612                                              | 0.010582229                                                 | 32.77978884                                    |
| 0.059443602                                              | 0.009533732                                                 | 36.49837134                                    |
| 0.05011482                                               | 0.010247082                                                 | 67.60489251                                    |
| 0.04797551                                               | 0.01087217                                                  | 33.58285714                                    |
| 0.044902602                                              | 0.004024147                                                 | 27.48039216                                    |
| 0.047919848                                              | 0.009527201                                                 | 70.44217687                                    |
| 0.068457321                                              | 0.01931365                                                  | 9.65248227                                     |
| 0.052432809                                              | 0.003350019                                                 | 88.71631206                                    |
| 0.0496515                                                | 0.01081977                                                  | 22.44247788                                    |
| 0.064706158                                              | 0.012372904                                                 | 46.32960894                                    |
| 0.044765286                                              | 0.007214463                                                 | 43.64615385                                    |
| 0.052673097                                              | 0.011282295                                                 | 26.38922156                                    |
| 0.056435328                                              | 0.013508994                                                 | 16.42268041                                    |
| 0.048299049                                              | 0.008660186                                                 | 40.61950059                                    |
| 0.056117862                                              | 0.005996619                                                 | 66.72413793                                    |
| 0.064251568                                              | 0.031000587                                                 | 9.701986755                                    |
| 0.050368                                                 | 0.025948503                                                 | 6.296                                          |
| 0.049993962                                              | 0.015191973                                                 | 9.098901099                                    |
| 0.053463105                                              | 0.013338687                                                 | 25.12765957                                    |
| 0.046844809                                              | 0.008219196                                                 | 43.47198276                                    |
| 0.060120369                                              | 0.017326914                                                 | 60.54121152                                    |
| 0.057555612                                              | 0.007975122                                                 | 23.0798005                                     |
| 0.039514788                                              | 0.010996599                                                 | 12.40764331                                    |
| 0.049607438                                              | 0.016596003                                                 | 21.82727273                                    |
| 0.054054                                                 | 0.009206045                                                 | 54.054                                         |
| 0.050717974                                              | 0.007639543                                                 | 35.40114613                                    |
| 0.05439821                                               | 0.011800053                                                 | 14.90510949                                    |
| 0.053827617                                              | 0.007701507                                                 | 91.39929329                                    |
| 0.050442182                                              | 0.011147268                                                 | 23.40517241                                    |
| 0.041976716                                              | 0.007431725                                                 | 38.03090508                                    |
| 0.043969955                                              | 0.004356066                                                 | 104.8683438                                    |
| 0.045994668                                              | 0.008943301                                                 | 29.85053929                                    |
| 0.05598789                                               | 0.021834134                                                 | 12.7092511                                     |
| 0.045046854                                              | 0.005544177                                                 | 52.61472603                                    |
| 0.050873569                                              | 0.013267049                                                 | 8.597633136                                    |
| 0.049450025                                              | 0.007358183                                                 | 73.68053691                                    |
| 0.058116727                                              | 0.009192301                                                 | 80.54978355                                    |
| 0.050060452                                              | 0.009678192                                                 | 30.33663366                                    |
| 0.054190855                                              | 0.036533218                                                 | 10.13368984                                    |
| 0.048325449                                              | 0.010673709                                                 | 67.02739726                                    |
| 0.046957175                                              | 0.013527262                                                 | 22.72727273                                    |
| 0.055794945                                              | 0.022330079                                                 | 19.08187135                                    |
| 0.050073685                                              | 0.005974814                                                 | 40.30931677                                    |
| 0.071702653                                              | 0.020540017                                                 | 17.78225806                                    |
| 0.048836387                                              | 0.0111989                                                   | 30.62041467                                    |
| 0.04491155                                               | 0.012596176                                                 | 6.961290323                                    |
| 0.047451383                                              | 0.019451188                                                 | 20.35664336                                    |
| 0.06162928                                               | 0.015941003                                                 | 23.72727273                                    |
| 0.04316106                                               | 0.010613537                                                 | 23.13432836                                    |
| 0.053679489                                              | 0.012554924                                                 | 16.05016722                                    |
| 0.055042881                                              | 0.0124231                                                   | 40.78677463                                    |
| 0.065147739                                              | 0.015850617                                                 | 27.62264151                                    |
| 0.050417429                                              | 0.010307059                                                 | 32.56965944                                    |
| 0.043623083                                              | 0.010679871                                                 | 8.07027027                                     |
| 0.051043328                                              | 0.013600256                                                 | 21.54028436                                    |
| 0.050727744                                              | 0.014847744                                                 | 41.29238329                                    |
| 0.05323125                                               | 0.011633218                                                 | 24.37991266                                    |
| 0.047121485                                              | 0.011797642                                                 | 20.35648148                                    |
| 0.045395443                                              | 0.008318535                                                 | 12.07518797                                    |
| 0.057379119                                              | 0.005751166                                                 | 30.64044944                                    |
| 0.057874483                                              | 0.008191992                                                 | 58.62685094                                    |
| 0.051455736                                              | 0.01169773                                                  | 46.92763158                                    |
| 0.066748393                                              | 0.009209365                                                 | 43.05271318                                    |
| 0.039067714                                              | 0.006995461                                                 | 35.7860262                                     |
| 0.049598129                                              | 0.012707209                                                 | 37.9921671                                     |
| 0.054585324                                              | 0.017664708                                                 | 6.168141593                                    |
| 0.068289225                                              | 0.022896662                                                 | 6.282608696                                    |
| 0.047786359                                              | 0.005602428                                                 | 119.8959745                                    |

| log.sigma.4.5.mm.3D_gldzm_HighIntensityLargeDistanceEmphasis | log.sigma.4.5.mm.3D_gldzm_SmallDistanceEmphasis | log.sigma.4.5.mm.3D_glcm_SumVariance | log.sigma.4.5.mm.3D_glcm_Homogeneity1 |
|--------------------------------------------------------------|-------------------------------------------------|--------------------------------------|---------------------------------------|
| 391.0395683                                                  | 0.955485612                                     | 788.6389228                          | 0.308918054                           |
| 379.3913043                                                  | 0.967391304                                     | 889.0896337                          | 0.28262514                            |
| 381.4771429                                                  | 0.955                                           | 876.649817                           | 0.29473624                            |
| 427.7531646                                                  | 0.957278481                                     | 891.2807792                          | 0.26875703                            |
| 256.5940803                                                  | 0.931818182                                     | 518.6886473                          | 0.32757725                            |
| 356.2241379                                                  | 0.941810345                                     | 797.0852577                          | 0.2987734                             |
| 204.3650255                                                  | 0.978777589                                     | 366.815675                           | 0.489951751                           |
| 360.5250284                                                  | 0.966296928                                     | 709.6068433                          | 0.368244434                           |
| 239.6008188                                                  | 0.995394063                                     | 389.5863407                          | 0.417666666                           |
| 201.6096491                                                  | 0.976973684                                     | 376.0738239                          | 0.360197715                           |
| 128.902439                                                   | 0.984320557                                     | 228.3214237                          | 0.451994135                           |
| 216.700428                                                   | 0.971112696                                     | 366.9818027                          | 0.443854623                           |
| 300.9372937                                                  | 0.948019802                                     | 741.6742825                          | 0.306232491                           |
| 367.3440514                                                  | 0.908360129                                     | 758.969524                           | 0.271561542                           |
| 238.0260708                                                  | 0.976256983                                     | 399.3023644                          | 0.356570395                           |
| 226.6200586                                                  | 0.98682284                                      | 483.3281816                          | 0.430714647                           |
| 136.0888889                                                  | 0.9875                                          | 220.4561633                          | 0.416095693                           |
| 352.1156069                                                  | 0.952312139                                     | 747.7793192                          | 0.282999249                           |
| 150.591133                                                   | 0.981527094                                     | 222.5846825                          | 0.450354683                           |
| 589.8255763                                                  | 0.982057416                                     | 1640.475826                          | 0.38763715                            |
| 230.8183333                                                  | 0.9825                                          | 521.6259732                          | 0.348600772                           |
| 278.408284                                                   | 0.960059172                                     | 620.4364515                          | 0.3296232                             |
| 236.4098361                                                  | 0.967213115                                     | 479.2266589                          | 0.339130862                           |
| 191.6599634                                                  | 0.984917733                                     | 320.1048634                          | 0.496514028                           |
| 389.1212871                                                  | 0.985148515                                     | 933.5132078                          | 0.36598749                            |
| 436.7086514                                                  | 0.981870229                                     | 963.273342                           | 0.357785036                           |
| 348.4293629                                                  | 0.969875346                                     | 680.6280376                          | 0.321908358                           |
| 212.3815789                                                  | 0.985902256                                     | 376.5895342                          | 0.400033289                           |
| 116.6857143                                                  | 1                                               | 245.5666141                          | 0.453852495                           |
| 217.5902004                                                  | 0.993318486                                     | 447.7112026                          | 0.366433621                           |
| 251.7380952                                                  | 0.985                                           | 496.6393129                          | 0.373732153                           |
| 372.497006                                                   | 0.959580838                                     | 875.5433171                          | 0.290072865                           |
| 298.479638                                                   | 0.949095023                                     | 553.1281134                          | 0.375819768                           |
| 247.4169381                                                  | 0.990228013                                     | 564.5534695                          | 0.409777367                           |
| 259.358043                                                   | 0.975537435                                     | 488.5127105                          | 0.38997269                            |
| 356.2157143                                                  | 0.91                                            | 785.1186786                          | 0.327207815                           |
| 505.6062092                                                  | 0.863970588                                     | 1070.601976                          | 0.288887448                           |
| 283.4884354                                                  | 0.979591837                                     | 599.9612399                          | 0.454098223                           |
| 175.7092199                                                  | 0.957446809                                     | 344.5061785                          | 0.364588178                           |
| 531.9468085                                                  | 0.978280142                                     | 1240.046153                          | 0.459660686                           |
| 278.4402655                                                  | 0.958517699                                     | 521.0796594                          | 0.331662416                           |
| 215.6829609                                                  | 0.974860335                                     | 391.2904184                          | 0.518352732                           |
| 372.9630769                                                  | 0.974615385                                     | 900.0356599                          | 0.30074049                            |
| 273.259481                                                   | 0.971556886                                     | 544.3783389                          | 0.325118026                           |
| 240.6323024                                                  | 0.961340206                                     | 415.0181976                          | 0.457615542                           |
| 298.8787158                                                  | 0.97235434                                      | 625.5321509                          | 0.335029347                           |
| 321.1614802                                                  | 0.982338099                                     | 677.0511833                          | 0.414492027                           |
| 146.2649007                                                  | 1                                               | 296.2385085                          | 0.373375395                           |
| 224.104                                                      | 0.982                                           | 390.862491                           | 0.34095628                            |
| 312.8846154                                                  | 0.975274725                                     | 766.2612759                          | 0.304334356                           |
| 232.9659574                                                  | 0.988829787                                     | 376.3070716                          | 0.348186114                           |
| 391.8265086                                                  | 0.961206897                                     | 884.7114693                          | 0.339618127                           |
| 174.2363456                                                  | 0.978401192                                     | 283.3007883                          | 0.549400002                           |
| 323.7182045                                                  | 0.97755611                                      | 738.3103229                          | 0.404008419                           |
| 417.111465                                                   | 0.961783439                                     | 1035.283507                          | 0.270577747                           |
| 223.4045455                                                  | 0.976136364                                     | 457.2719844                          | 0.322131441                           |
| 248.222                                                      | 0.98425                                         | 474.1788573                          | 0.403076574                           |
| 319.1332378                                                  | 0.975286533                                     | 718.2882803                          | 0.329412326                           |
| 282.7810219                                                  | 0.931569343                                     | 538.7676687                          | 0.33491809                            |
| 291.6766784                                                  | 0.983657244                                     | 625.5048834                          | 0.509815597                           |
| 257.2025862                                                  | 0.982219828                                     | 549.8286876                          | 0.352103338                           |
| 430.6975717                                                  | 0.963576159                                     | 1046.554328                          | 0.324411251                           |
| 514.1677149                                                  | 0.947484277                                     | 1123.025026                          | 0.361861633                           |
| 387.9491525                                                  | 0.929506934                                     | 810.7208527                          | 0.345253971                           |
| 186.2907489                                                  | 0.976872247                                     | 371.3991693                          | 0.352145959                           |
| 440.4520548                                                  | 0.947988014                                     | 998.667887                           | 0.323573453                           |
| 355.9526627                                                  | 0.933431953                                     | 803.5254853                          | 0.292243423                           |
| 365.2248322                                                  | 0.952181208                                     | 714.4690724                          | 0.362320578                           |
| 242.9848485                                                  | 0.983225108                                     | 507.1308855                          | 0.429448265                           |
| 282.0709571                                                  | 0.971534653                                     | 711.5598239                          | 0.35249903                            |
| 194.3743316                                                  | 0.975935829                                     | 345.5695865                          | 0.322281864                           |
| 284.8622927                                                  | 0.975666907                                     | 591.9916311                          | 0.377069188                           |
| 266.4793388                                                  | 0.981404959                                     | 530.4089032                          | 0.307807323                           |
| 172.2602339                                                  | 0.995614035                                     | 335.9863211                          | 0.362072403                           |
| 354.3291925                                                  | 0.921566598                                     | 565.098734                           | 0.436303967                           |
| 143.9233871                                                  | 0.987903226                                     | 291.8683212                          | 0.377751796                           |
| 293.6826156                                                  | 0.973684211                                     | 710.8615543                          | 0.360747404                           |
| 563.4774194                                                  | 0.917741935                                     | 1312.871007                          | 0.262782586                           |
| 253.04662                                                    | 0.975524476                                     | 583.551513                           | 0.347684694                           |
| 200.5168831                                                  | 0.982467532                                     | 361.4030526                          | 0.423689123                           |
| 373.9384328                                                  | 0.960820896                                     | 776.6278404                          | 0.310789929                           |
| 259.0501672                                                  | 0.982441472                                     | 727.4982736                          | 0.33575181                            |
| 210.3265857                                                  | 0.988866397                                     | 383.8511231                          | 0.369013471                           |
| 195.9481132                                                  | 0.984080189                                     | 328.8462127                          | 0.399413837                           |
| 278.2848297                                                  | 0.960526316                                     | 522.5225411                          | 0.407938685                           |
| 475.9189189                                                  | 0.963513514                                     | 1321.958053                          | 0.320122596                           |
| 263.049763                                                   | 0.959123223                                     | 533.8247884                          | 0.35269851                            |
| 222.3783784                                                  | 0.990786241                                     | 367.2489236                          | 0.467408857                           |
| 253.1310044                                                  | 0.977074236                                     | 530.6649363                          | 0.392089442                           |
| 286.8819444                                                  | 0.989583333                                     | 638.8415389                          | 0.33146689                            |
| 611.2556391                                                  | 0.906954887                                     | 1276.836937                          | 0.342407408                           |
| 318.2808989                                                  | 0.976123596                                     | 616.4361263                          | 0.423773946                           |
| 271.9960513                                                  | 0.973346496                                     | 564.8472091                          | 0.399956193                           |
| 247.1469298                                                  | 0.981085526                                     | 518.8391022                          | 0.374717359                           |
| 234.8682171                                                  | 0.975581395                                     | 487.463579                           | 0.418930792                           |
| 458.2980349                                                  | 0.932041485                                     | 952.8417003                          | 0.294050249                           |
| 267.2793734                                                  | 0.946148825                                     | 554.0589536                          | 0.34255496                            |
| 318.4867257                                                  | 0.946902655                                     | 718.9788746                          | 0.331797881                           |
| 201.4456522                                                  | 0.951086957                                     | 469.1300548                          | 0.344082978                           |
| 377.1941012                                                  | 0.962634516                                     | 958.3622759                          | 0.363360824                           |



| log.sigma.4.5.mm.3D_glc_m_Contrast | log.sigma.4.5.mm.3D_glc_m_DifferenceEntropy | log.sigma.4.5.mm.3D_glc_m_InverseVariance | log.sigma.4.5.mm.3D_glc_m_Entropy | log.sigma.4.5.mm.3D_glc_m_Dissimilarity |
|------------------------------------|---------------------------------------------|-------------------------------------------|-----------------------------------|-----------------------------------------|
| 28.16033531                        | 3.464308778                                 | 0.222390381                               | 8.507321355                       | 4.189388045                             |
| 33.78263603                        | 3.507841394                                 | 0.195221659                               | 7.866640785                       | 4.692996123                             |
| 31.40983926                        | 3.440791088                                 | 0.207071951                               | 8.249217997                       | 4.520896702                             |
| 37.99627826                        | 3.583517619                                 | 0.186299102                               | 7.967541204                       | 4.970891306                             |
| 21.28020528                        | 3.268260853                                 | 0.243317326                               | 8.250105939                       | 3.660089219                             |
| 25.66379182                        | 3.313994694                                 | 0.222832503                               | 7.551709766                       | 4.098740833                             |
| 11.90943424                        | 2.863163379                                 | 0.323772892                               | 7.238252214                       | 2.317352678                             |
| 21.7018878                         | 3.307809778                                 | 0.269353064                               | 8.239702886                       | 3.488224084                             |
| 16.16839999                        | 3.08491978                                  | 0.301543715                               | 7.692116835                       | 2.915145395                             |
| 15.58504627                        | 3.037707167                                 | 0.273646582                               | 7.665260524                       | 3.120541092                             |
| 8.686034396                        | 2.674223396                                 | 0.358400174                               | 6.916379473                       | 2.208818788                             |
| 12.31551232                        | 2.929589988                                 | 0.332579532                               | 7.435508661                       | 2.528971807                             |
| 30.3001528                         | 3.457685835                                 | 0.223075571                               | 8.281840819                       | 4.327259191                             |
| 36.39286                           | 3.546123731                                 | 0.183079544                               | 8.388613584                       | 4.877890723                             |
| 22.48519284                        | 3.29574111                                  | 0.269643571                               | 8.009769761                       | 3.545941751                             |
| 19.78440421                        | 3.104809035                                 | 0.295586109                               | 7.767277936                       | 3.104389178                             |
| 9.811699495                        | 2.763558873                                 | 0.335680303                               | 7.123404023                       | 2.419015875                             |
| 34.91145549                        | 3.541263705                                 | 0.192572657                               | 8.084071131                       | 4.733975674                             |
| 8.570658518                        | 2.651422693                                 | 0.372182195                               | 6.836193244                       | 2.186010406                             |
| 16.36720594                        | 3.1060601                                   | 0.299243097                               | 8.036102667                       | 3.0133045                               |
| 19.15030032                        | 3.190481169                                 | 0.264448429                               | 8.129449968                       | 3.413447339                             |
| 21.56104959                        | 3.250486866                                 | 0.241470598                               | 7.822747097                       | 3.6850688                               |
| 20.48414147                        | 3.219351939                                 | 0.250049131                               | 7.837333052                       | 3.565108764                             |
| 8.433344698                        | 2.676766098                                 | 0.360282878                               | 6.877268153                       | 2.025457101                             |
| 25.62809133                        | 3.332853667                                 | 0.260806403                               | 8.111487633                       | 3.724687248                             |
| 21.14587795                        | 3.266309171                                 | 0.273009216                               | 8.197375657                       | 3.485103415                             |
| 25.95740073                        | 3.352441744                                 | 0.237506865                               | 8.262942631                       | 3.960002071                             |
| 12.65915854                        | 2.953635865                                 | 0.305313235                               | 7.613523265                       | 2.727224006                             |
| 6.986514451                        | 2.497739519                                 | 0.349675974                               | 6.000267885                       | 2.049515466                             |
| 15.14063799                        | 3.026159715                                 | 0.284508932                               | 7.751127681                       | 3.04097087                              |
| 18.29495002                        | 3.152718458                                 | 0.282370823                               | 8.025303592                       | 3.241041042                             |
| 31.07659326                        | 3.47665767                                  | 0.197645583                               | 8.261755941                       | 4.495803861                             |
| 17.5586192                         | 3.144721031                                 | 0.290684487                               | 8.053459895                       | 3.171661286                             |
| 16.32889017                        | 3.088631702                                 | 0.300856375                               | 7.760326723                       | 2.949138733                             |
| 16.36948441                        | 3.119080537                                 | 0.29915352                                | 7.934989369                       | 3.016477779                             |
| 26.94476642                        | 3.406094434                                 | 0.234273491                               | 8.407094424                       | 4.027861036                             |
| 36.6130435                         | 3.464017404                                 | 0.203408197                               | 8.53041463                        | 4.707533849                             |
| 18.8657845                         | 3.128328734                                 | 0.278566745                               | 7.683100409                       | 2.97887066                              |
| 14.04253181                        | 2.888614797                                 | 0.276796371                               | 7.364156854                       | 2.99411931                              |
| 11.17745309                        | 2.865488781                                 | 0.339996021                               | 7.478639966                       | 2.359060372                             |
| 21.42189237                        | 3.2658438                                   | 0.245425706                               | 8.214958593                       | 3.653420268                             |
| 6.32879956                         | 2.514023767                                 | 0.378282536                               | 6.592623266                       | 1.768308071                             |
| 34.12620059                        | 3.41022884                                  | 0.21465507                                | 8.590959999                       | 4.571923111                             |
| 21.68101206                        | 3.265192778                                 | 0.24403997                                | 8.260003647                       | 3.700206638                             |
| 11.5552434                         | 2.858333758                                 | 0.343039922                               | 7.17868139                        | 2.405131232                             |
| 23.72852488                        | 3.343283756                                 | 0.245730213                               | 8.350739648                       | 3.79612531                              |
| 13.60874402                        | 3.0013944                                   | 0.311817494                               | 7.689162806                       | 2.728931331                             |
| 13.48225134                        | 2.954481949                                 | 0.28785301                                | 7.236696448                       | 2.911816188                             |
| 18.88627329                        | 3.156489257                                 | 0.242506147                               | 7.648626519                       | 3.44464677                              |
| 24.15040553                        | 3.290288162                                 | 0.224639919                               | 7.862442131                       | 3.9716711                               |
| 20.48675822                        | 3.25412763                                  | 0.253469842                               | 7.954253736                       | 3.514869736                             |
| 21.19206977                        | 3.280963063                                 | 0.254127639                               | 8.317572171                       | 3.571657436                             |
| 7.072179406                        | 2.538177176                                 | 0.363056815                               | 6.470861834                       | 1.754608526                             |
| 13.72738201                        | 2.929861705                                 | 0.32254462                                | 7.471803692                       | 2.760596626                             |
| 37.25168608                        | 3.591062093                                 | 0.190239703                               | 8.454372715                       | 4.934517407                             |
| 22.37853915                        | 3.283704849                                 | 0.238546209                               | 8.204539562                       | 3.761467911                             |
| 16.16178851                        | 3.078419148                                 | 0.300802417                               | 7.840768727                       | 2.962807782                             |
| 22.56810271                        | 3.304328256                                 | 0.237065019                               | 8.149519742                       | 3.756485072                             |
| 20.26886221                        | 3.216985629                                 | 0.249551965                               | 7.919764196                       | 3.572864968                             |
| 10.03080741                        | 2.768902265                                 | 0.326056483                               | 7.0848375                         | 2.129943703                             |
| 19.20877137                        | 3.203968691                                 | 0.269759892                               | 7.993401587                       | 3.393077148                             |
| 23.84905032                        | 3.350684242                                 | 0.242115242                               | 8.476623961                       | 3.844522175                             |
| 21.98222584                        | 3.298763165                                 | 0.272156472                               | 8.375997839                       | 3.506782904                             |
| 20.15374002                        | 3.245078113                                 | 0.260661352                               | 8.31425714                        | 3.478647968                             |
| 16.74799214                        | 3.086632184                                 | 0.266873809                               | 7.614850994                       | 3.235749633                             |
| 22.56575712                        | 3.316996167                                 | 0.2393355                                 | 8.372937648                       | 3.763691394                             |
| 29.44071355                        | 3.403393299                                 | 0.207818294                               | 7.86693955                        | 4.358692912                             |
| 18.13017009                        | 3.186222391                                 | 0.276174851                               | 8.143279325                       | 3.270330842                             |
| 10.72722011                        | 2.84878699                                  | 0.336568028                               | 7.543146646                       | 2.446435974                             |
| 17.88397069                        | 3.167660821                                 | 0.261394606                               | 8.053777071                       | 3.321811897                             |
| 22.15042516                        | 3.197163324                                 | 0.231277307                               | 7.726241339                       | 3.770755089                             |
| 22.16797018                        | 3.303489594                                 | 0.272254828                               | 8.196050753                       | 3.4895181                               |
| 27.65424931                        | 3.419814454                                 | 0.218449231                               | 8.326947099                       | 4.186022309                             |
| 15.62253521                        | 3.054028689                                 | 0.290214433                               | 7.647702709                       | 3.092994555                             |
| 13.71657749                        | 2.987136444                                 | 0.319637234                               | 7.667492429                       | 2.646118618                             |
| 12.20026708                        | 2.857160548                                 | 0.294619528                               | 7.306715893                       | 2.791265768                             |
| 16.59891075                        | 3.119017467                                 | 0.280627978                               | 8.02251675                        | 3.173650494                             |
| 43.10702905                        | 3.659437561                                 | 0.176941657                               | 7.948819417                       | 5.29682091                              |
| 17.39275753                        | 3.125209793                                 | 0.269685196                               | 8.038517413                       | 3.283193841                             |
| 11.38711596                        | 2.874000557                                 | 0.338068492                               | 7.374224021                       | 2.506109727                             |
| 27.52890496                        | 3.447137005                                 | 0.224301404                               | 8.478230744                       | 4.14261571                              |
| 18.81430237                        | 3.151289181                                 | 0.253787536                               | 7.953666351                       | 3.462654838                             |
| 20.65253612                        | 3.234474201                                 | 0.260083352                               | 7.943652799                       | 3.437544732                             |
| 12.23931791                        | 2.913302477                                 | 0.314764978                               | 7.479496836                       | 2.678407401                             |
| 15.55236743                        | 3.054928284                                 | 0.314137445                               | 7.792155249                       | 2.898891634                             |
| 26.54812064                        | 3.392560286                                 | 0.236990258                               | 7.675842574                       | 4.028672975                             |
| 19.3160818                         | 3.191533067                                 | 0.267984045                               | 8.047957403                       | 3.403941603                             |
| 13.43970271                        | 2.946029176                                 | 0.330442805                               | 7.42488481                        | 2.520259929                             |
| 14.49321736                        | 3.02930518                                  | 0.311452713                               | 7.642562839                       | 2.884569718                             |
| 21.59554656                        | 3.27707601                                  | 0.239850074                               | 8.238169555                       | 3.667565655                             |
| 22.81615414                        | 3.294244679                                 | 0.261163086                               | 8.007325952                       | 3.657435191                             |
| 12.93810422                        | 2.928844781                                 | 0.335718933                               | 7.517999273                       | 2.626262457                             |
| 11.93505346                        | 2.915824648                                 | 0.314574571                               | 7.65533073                        | 2.659479357                             |
| 15.86123898                        | 3.089079671                                 | 0.286249517                               | 7.989261583                       | 3.067753814                             |
| 9.286716696                        | 2.71339524                                  | 0.342048843                               | 7.271163552                       | 2.360740606                             |
| 32.63870305                        | 3.554739529                                 | 0.207271919                               | 8.7780955                         | 4.521722482                             |
| 19.63525924                        | 3.206310445                                 | 0.261613532                               | 8.195635323                       | 3.46930133                              |
| 21.44459289                        | 3.22552672                                  | 0.253540487                               | 7.476582865                       | 3.639773781                             |
| 17.78175224                        | 3.074145312                                 | 0.268186613                               | 7.094314581                       | 3.343757587                             |
| 19.79222102                        | 3.232115806                                 | 0.27000089                                | 8.237115425                       | 3.376334056                             |

| log.sigma.4.5.mm.3D_glcm_DifferenceVariance | log.sigma.4.5.mm.3D_glcm_ldn | log.sigma.4.5.mm.3D_glcm_ldm | log.sigma.4.5.mm.3D_glcm_Correlation | log.sigma.4.5.mm.3D_glcm_Autocorrelation |
|---------------------------------------------|------------------------------|------------------------------|--------------------------------------|------------------------------------------|
| 9.957766972                                 | 0.893786892                  | 0.216638692                  | 0.616019525                          | 267.6481684                              |
| 10.57198426                                 | 0.876203778                  | 0.188624943                  | 0.573481703                          | 294.743512                               |
| 9.491455293                                 | 0.886143016                  | 0.203419573                  | 0.535087471                          | 291.5983419                              |
| 12.14568444                                 | 0.873508689                  | 0.173784837                  | 0.561692407                          | 294.1170088                              |
| 7.458927997                                 | 0.890944618                  | 0.234192832                  | 0.656091208                          | 185.5423169                              |
| 8.169490422                                 | 0.879463164                  | 0.203024038                  | 0.652468206                          | 267.4137949                              |
| 6.296602542                                 | 0.941902751                  | 0.426635654                  | 0.652871409                          | 136.8795362                              |
| 9.061841242                                 | 0.912683559                  | 0.285554496                  | 0.593483474                          | 243.7313504                              |
| 7.134211697                                 | 0.912383535                  | 0.342717998                  | 0.618207197                          | 144.0556898                              |
| 5.365099353                                 | 0.891572276                  | 0.269828478                  | 0.628000362                          | 140.1167047                              |
| 3.530927593                                 | 0.910797723                  | 0.380488942                  | 0.605589367                          | 91.66794827                              |
| 5.705596403                                 | 0.920068571                  | 0.373088722                  | 0.632479362                          | 137.3788486                              |
| 10.41729444                                 | 0.882017705                  | 0.21542842                   | 0.604182405                          | 251.7267039                              |
| 11.13137586                                 | 0.875361055                  | 0.175712542                  | 0.581629559                          | 255.8675795                              |
| 9.295386832                                 | 0.904132052                  | 0.271204232                  | 0.570212074                          | 146.4534479                              |
| 8.95110574                                  | 0.913863523                  | 0.361714011                  | 0.603487393                          | 173.5427329                              |
| 3.815649544                                 | 0.894172625                  | 0.335014875                  | 0.602496386                          | 89.28783949                              |
| 11.49604684                                 | 0.881813836                  | 0.189186605                  | 0.600341078                          | 252.4427869                              |
| 3.539657334                                 | 0.907875474                  | 0.379373002                  | 0.594103602                          | 89.54001539                              |
| 6.880826398                                 | 0.936182646                  | 0.305294897                  | 0.65499866                           | 514.3592208                              |
| 7.038967469                                 | 0.89111757                   | 0.259023348                  | 0.651520605                          | 186.7294912                              |
| 7.399736488                                 | 0.883377645                  | 0.237171235                  | 0.614684701                          | 215.6454377                              |
| 7.196232893                                 | 0.893595523                  | 0.248201522                  | 0.603739599                          | 172.270843                               |
| 4.184255135                                 | 0.92751967                   | 0.434261603                  | 0.64011972                           | 121.5079674                              |
| 10.64736422                                 | 0.908136829                  | 0.284820313                  | 0.601025274                          | 310.3470609                              |
| 8.411370375                                 | 0.918607533                  | 0.272652706                  | 0.639051186                          | 319.9883457                              |
| 8.991806918                                 | 0.899122585                  | 0.230682699                  | 0.567416663                          | 234.3101486                              |
| 4.969588891                                 | 0.910432556                  | 0.317039284                  | 0.634448472                          | 141.0431288                              |
| 2.619240289                                 | 0.908004055                  | 0.377703619                  | 0.63472306                           | 95.26487807                              |
| 5.469055857                                 | 0.907207731                  | 0.277279003                  | 0.618829313                          | 163.306189                               |
| 7.089276884                                 | 0.90843745                   | 0.290071705                  | 0.63180831                           | 178.6494233                              |
| 9.866401986                                 | 0.87377929                   | 0.195399959                  | 0.53961484                           | 291.2013317                              |
| 7.022014098                                 | 0.921331357                  | 0.292477114                  | 0.671449726                          | 196.801008                               |
| 7.20314739                                  | 0.920914464                  | 0.332934723                  | 0.640669538                          | 199.5120655                              |
| 6.964988432                                 | 0.914222182                  | 0.30848201                   | 0.636230067                          | 176.2114694                              |
| 9.600263553                                 | 0.88613427                   | 0.238539646                  | 0.578379975                          | 265.9476651                              |
| 10.8034076                                  | 0.883350764                  | 0.195560513                  | 0.539237432                          | 348.7984894                              |
| 9.361414417                                 | 0.925602291                  | 0.387503193                  | 0.639393943                          | 209.4675993                              |
| 4.235242854                                 | 0.882548597                  | 0.273521489                  | 0.621638477                          | 129.8052115                              |
| 5.416993634                                 | 0.947048536                  | 0.390464877                  | 0.682284233                          | 397.8312395                              |
| 7.560386306                                 | 0.90025734                   | 0.239542265                  | 0.644029764                          | 186.206546                               |
| 3.092339319                                 | 0.945483944                  | 0.459295007                  | 0.667083338                          | 143.258326                               |
| 9.663239243                                 | 0.888842933                  | 0.211013032                  | 0.579684776                          | 300.2472327                              |
| 7.408877463                                 | 0.898982651                  | 0.23192191                   | 0.65483815                           | 193.554278                               |
| 5.556770895                                 | 0.926130307                  | 0.389501429                  | 0.643539014                          | 151.7679959                              |
| 8.615862874                                 | 0.894499453                  | 0.246391373                  | 0.605209116                          | 218.2756872                              |
| 5.900375851                                 | 0.925793727                  | 0.336238621                  | 0.622734003                          | 233.495001                               |
| 4.709402472                                 | 0.885508443                  | 0.284587376                  | 0.566437318                          | 113.4671413                              |
| 6.446501535                                 | 0.896403442                  | 0.247344791                  | 0.68332198                           | 143.8087727                              |
| 7.651669488                                 | 0.87897829                   | 0.208211464                  | 0.607702149                          | 259.523702                               |
| 7.707765902                                 | 0.895286837                  | 0.258966565                  | 0.624639499                          | 139.1025861                              |
| 7.977484828                                 | 0.907651006                  | 0.248679396                  | 0.634895056                          | 297.2063557                              |
| 3.877407219                                 | 0.943106894                  | 0.497893015                  | 0.655553816                          | 108.4788016                              |
| 5.311641467                                 | 0.920551076                  | 0.324527585                  | 0.590150943                          | 250.5705834                              |
| 11.84188332                                 | 0.877349394                  | 0.176348365                  | 0.600324381                          | 339.1877239                              |
| 7.652297213                                 | 0.88834523                   | 0.228582433                  | 0.644901395                          | 165.4161504                              |
| 6.771285977                                 | 0.918173053                  | 0.324651147                  | 0.638659913                          | 171.8525284                              |
| 7.934267672                                 | 0.891939961                  | 0.237649269                  | 0.572122785                          | 245.4414898                              |
| 6.982813649                                 | 0.886326778                  | 0.243063141                  | 0.574544493                          | 190.8282542                              |
| 5.271736528                                 | 0.941634351                  | 0.449357595                  | 0.656394591                          | 216.0878179                              |
| 7.18807981                                  | 0.904188401                  | 0.263675632                  | 0.5902337                            | 194.6976619                              |
| 8.468288347                                 | 0.910546492                  | 0.233273658                  | 0.639762016                          | 345.275905                               |
| 8.995135343                                 | 0.923776175                  | 0.277712386                  | 0.628741031                          | 366.9372333                              |
| 7.578245775                                 | 0.914230477                  | 0.255099033                  | 0.672289251                          | 275.8885547                              |
| 5.788819066                                 | 0.89189196                   | 0.260682149                  | 0.551745196                          | 137.975824                               |
| 7.845193139                                 | 0.912028423                  | 0.230422697                  | 0.608318897                          | 330.4592941                              |
| 9.475196793                                 | 0.869641843                  | 0.196806932                  | 0.543336113                          | 268.5751913                              |
| 7.02574565                                  | 0.918904441                  | 0.275169164                  | 0.641250488                          | 246.0769402                              |
| 4.527280089                                 | 0.928489734                  | 0.353093743                  | 0.69030096                           | 182.5539836                              |
| 6.473814429                                 | 0.89983161                   | 0.262231199                  | 0.626537839                          | 244.7910694                              |
| 6.83983168                                  | 0.868179546                  | 0.228347106                  | 0.58189222                           | 128.2468384                              |
| 9.500762064                                 | 0.908315928                  | 0.297355898                  | 0.595103113                          | 207.7398512                              |
| 9.35702513                                  | 0.884777627                  | 0.215206398                  | 0.591544693                          | 187.263331                               |
| 5.68799555                                  | 0.902856684                  | 0.273459924                  | 0.59835732                           | 127.0395466                              |
| 6.346053066                                 | 0.935397101                  | 0.363539214                  | 0.688192051                          | 200.4149747                              |
| 3.96741579                                  | 0.88463002                   | 0.288606696                  | 0.583530977                          | 112.5293707                              |
| 6.167114685                                 | 0.911899431                  | 0.272136767                  | 0.649416504                          | 245.01419                                |
| 13.69387756                                 | 0.870110255                  | 0.169831052                  | 0.539204628                          | 416.525059                               |
| 6.173801035                                 | 0.897589345                  | 0.25606223                   | 0.657484464                          | 206.2877556                              |
| 4.902026107                                 | 0.922493777                  | 0.346833506                  | 0.6155127                            | 135.6420976                              |
| 9.722536408                                 | 0.894785605                  | 0.218512882                  | 0.622944302                          | 264.1765224                              |
| 6.225762433                                 | 0.892522879                  | 0.242570689                  | 0.642658397                          | 249.2652904                              |
| 8.057769305                                 | 0.898065003                  | 0.28482943                   | 0.555998542                          | 141.9155285                              |
| 4.774246859                                 | 0.914632467                  | 0.31613466                   | 0.6037624                            | 125.2377826                              |
| 6.677311414                                 | 0.917461717                  | 0.331545449                  | 0.661966154                          | 186.847043                               |
| 9.669004424                                 | 0.900090662                  | 0.229855508                  | 0.548121126                          | 419.3284681                              |
| 7.184151762                                 | 0.898148937                  | 0.264433227                  | 0.612615552                          | 190.139056                               |
| 6.862607345                                 | 0.925998392                  | 0.402758218                  | 0.659849454                          | 137.2102292                              |
| 5.878359699                                 | 0.914685081                  | 0.310632732                  | 0.594450091                          | 188.5076801                              |
| 7.697591546                                 | 0.89709784                   | 0.238815011                  | 0.643952403                          | 222.834924                               |
| 8.632848503                                 | 0.903616655                  | 0.254419765                  | 0.632819787                          | 410.247647                               |
| 5.653440489                                 | 0.919644247                  | 0.349138425                  | 0.641908163                          | 215.0579805                              |
| 4.652234318                                 | 0.926793017                  | 0.31664477                   | 0.661298327                          | 200.0664348                              |
| 6.099227815                                 | 0.914707781                  | 0.288762686                  | 0.659786445                          | 186.2569752                              |
| 3.397643403                                 | 0.917984139                  | 0.338219133                  | 0.65893309                           | 175.3019988                              |
| 11.19837513                                 | 0.899350205                  | 0.201188731                  | 0.602984529                          | 316.7600588                              |
| 7.00275986                                  | 0.899191954                  | 0.251957416                  | 0.636165109                          | 196.8129519                              |
| 7.525162123                                 | 0.884844751                  | 0.240298618                  | 0.580222242                          | 243.7176991                              |
| 5.977765144                                 | 0.876471519                  | 0.252671741                  | 0.522425038                          | 166.4591522                              |
| 7.817460699                                 | 0.914754111                  | 0.277505024                  | 0.611062895                          | 318.3558044                              |

| log.sigma.4.5.mm.3D_glcm_SumEntropy | log.sigma.4.5.mm.3D_glcm_AverageIntensity | log.sigma.4.5.mm.3D_glcm_Energy | log.sigma.4.5.mm.3D_glcm_SumSquares | log.sigma.4.5.mm.3D_glcm_ClusterProminence |
|-------------------------------------|-------------------------------------------|---------------------------------|-------------------------------------|--------------------------------------------|
| 5.418697713                         | 15.85579844                               | 0.003505765                     | 37.72199464                         | 36134.26966                                |
| 5.331761715                         | 16.63298767                               | 0.005238698                     | 39.63844963                         | 38588.37814                                |
| 5.273229508                         | 16.75435756                               | 0.004091342                     | 34.70748693                         | 25761.30244                                |
| 5.34895309                          | 16.62201288                               | 0.004719898                     | 43.66381342                         | 47139.5876                                 |
| 5.308364743                         | 12.87559868                               | 0.004023621                     | 31.33932318                         | 25617.8677                                 |
| 5.214026808                         | 15.71205759                               | 0.006207914                     | 37.89890872                         | 32294.55734                                |
| 4.808990689                         | 11.27722895                               | 0.017511224                     | 17.73611285                         | 12588.15377                                |
| 5.198413839                         | 15.23878256                               | 0.005036498                     | 27.38253949                         | 23698.26043                                |
| 4.97175249                          | 11.46342491                               | 0.008441096                     | 21.68978706                         | 17400.76682                                |
| 4.992167646                         | 11.26104133                               | 0.00604154                      | 21.07053128                         | 11229.45226                                |
| 4.550402502                         | 9.214425452                               | 0.012850763                     | 11.09518241                         | 3893.881836                                |
| 4.848185628                         | 11.26416872                               | 0.010633094                     | 16.86269451                         | 11420.16091                                |
| 5.358091778                         | 15.23541134                               | 0.004212387                     | 39.0031369                          | 33778.86393                                |
| 5.432298846                         | 15.38937558                               | 0.003577449                     | 44.18907504                         | 42570.75058                                |
| 5.123287296                         | 11.54907149                               | 0.005346231                     | 26.97540104                         | 21616.88795                                |
| 5.089754747                         | 12.6547285                                | 0.009962009                     | 25.36657915                         | 17074.01719                                |
| 4.643827892                         | 9.047244822                               | 0.00926232                      | 12.3322054                          | 4362.165154                                |
| 5.418164393                         | 15.17410987                               | 0.004426033                     | 44.00395441                         | 47413.44291                                |
| 4.505125653                         | 9.124178145                               | 0.013846795                     | 10.56716036                         | 3890.030209                                |
| 5.146145186                         | 22.45235797                               | 0.005975747                     | 23.53676618                         | 21108.39739                                |
| 5.228964922                         | 12.99739035                               | 0.004366581                     | 27.55392353                         | 19249.87704                                |
| 5.147767465                         | 14.09531322                               | 0.00548689                      | 27.84609906                         | 20787.77047                                |
| 5.125657554                         | 12.52155216                               | 0.00551886                      | 26.01481346                         | 19370.54165                                |
| 4.57285444                          | 10.67629329                               | 0.018947781                     | 11.73537072                         | 5843.742581                                |
| 5.295751403                         | 17.23427782                               | 0.005856822                     | 32.42668861                         | 29853.25852                                |
| 5.267857798                         | 17.50962097                               | 0.004893872                     | 29.82397932                         | 29559.92797                                |
| 5.254291788                         | 14.93838256                               | 0.004381684                     | 30.81050456                         | 24152.61656                                |
| 4.919973644                         | 11.40551179                               | 0.006862486                     | 17.33030874                         | 9108.236222                                |
| 4.251771362                         | 9.442266662                               | 0.01940203                      | 9.598815616                         | 2440.782222                                |
| 4.995591057                         | 12.30408583                               | 0.006012919                     | 20.041393                           | 12594.7611                                 |
| 5.14419663                          | 12.82614725                               | 0.005154331                     | 25.56296562                         | 18603.01446                                |
| 5.263041169                         | 16.6602398                                | 0.003962522                     | 34.43890709                         | 24456.43615                                |
| 5.209638579                         | 13.46102707                               | 0.00546703                      | 27.34078806                         | 25642.54188                                |
| 5.06207023                          | 13.70067166                               | 0.006857883                     | 23.54175943                         | 13756.89255                                |
| 5.077313493                         | 12.77869514                               | 0.006080376                     | 23.11919778                         | 15848.26616                                |
| 5.299086                            | 15.81511462                               | 0.00376023                      | 32.25412275                         | 25717.90574                                |
| 5.37653                             | 18.41713986                               | 0.003486711                     | 38.63336177                         | 38547.69685                                |
| 5.087013477                         | 14.00631708                               | 0.01628388                      | 26.85795414                         | 22525.26363                                |
| 4.882538152                         | 10.88268005                               | 0.0074851                       | 18.35001082                         | 8807.23421                                 |
| 4.920758128                         | 19.73239586                               | 0.010459367                     | 17.43865808                         | 14872.0101                                 |
| 5.28560866                          | 12.99372965                               | 0.004104967                     | 31.00751087                         | 23914.38493                                |
| 4.439158347                         | 11.70544135                               | 0.021413166                     | 9.565462588                         | 4738.131051                                |
| 5.472634081                         | 16.88066267                               | 0.003341643                     | 40.18291686                         | 41393.85304                                |
| 5.314602199                         | 13.25102243                               | 0.003948888                     | 32.32967545                         | 28328.62403                                |
| 4.756511168                         | 11.8988549                                | 0.013595455                     | 16.3254585                          | 11787.60613                                |
| 5.287401491                         | 14.25378285                               | 0.003945052                     | 31.13399748                         | 22376.23715                                |
| 4.946074958                         | 14.97322554                               | 0.007080507                     | 18.51914612                         | 10315.01708                                |
| 4.726045782                         | 10.23121933                               | 0.008531755                     | 15.50905819                         | 6362.851206                                |
| 5.169979703                         | 11.15411227                               | 0.006059363                     | 30.26917648                         | 29650.42551                                |
| 5.202336339                         | 15.59000373                               | 0.005189318                     | 31.411757                           | 23607.7485                                 |
| 5.145814965                         | 11.05067208                               | 0.005488782                     | 28.13884221                         | 24084.5048                                 |
| 5.287391484                         | 16.84660786                               | 0.004202983                     | 29.44075268                         | 26871.65845                                |
| 4.383927342                         | 10.09137767                               | 0.03017583                      | 10.30159596                         | 6797.098964                                |
| 4.852429572                         | 15.60778899                               | 0.007850181                     | 17.31637001                         | 8882.094577                                |
| 5.50945293                          | 17.90087481                               | 0.003437176                     | 46.66502434                         | 53791.04522                                |
| 5.289289819                         | 12.05982478                               | 0.004015683                     | 32.02529069                         | 26458.26297                                |
| 5.081236663                         | 12.61807077                               | 0.006491973                     | 23.03643137                         | 16209.05539                                |
| 5.148055303                         | 15.23843897                               | 0.004161752                     | 26.98615741                         | 14907.86366                                |
| 5.082633881                         | 13.31394427                               | 0.005104913                     | 23.82721287                         | 14553.30917                                |
| 4.71515744                          | 14.42237232                               | 0.021733195                     | 14.91856965                         | 9413.216945                                |
| 5.093722255                         | 13.50280726                               | 0.005116092                     | 23.93514612                         | 16344.198                                  |
| 5.376847914                         | 18.19982455                               | 0.003851101                     | 32.6419815                          | 34414.6209                                 |
| 5.284802865                         | 18.83861174                               | 0.004675732                     | 29.14363225                         | 27496.26787                                |
| 5.34196357                          | 16.11493361                               | 0.004277643                     | 31.10503323                         | 31180.5046                                 |
| 4.894435066                         | 11.29766952                               | 0.006277891                     | 18.69048157                         | 8548.503809                                |
| 5.276903077                         | 17.90274977                               | 0.003962832                     | 28.3498029                          | 26967.61183                                |
| 5.151677447                         | 15.9270411                                | 0.005200301                     | 32.65772482                         | 24237.35375                                |
| 5.191343578                         | 15.29632045                               | 0.00503007                      | 25.87438624                         | 22432.29086                                |
| 4.942662521                         | 13.08803433                               | 0.007727963                     | 17.67337492                         | 10826.67653                                |
| 5.143504603                         | 15.19565252                               | 0.004806513                     | 24.27959668                         | 15549.04191                                |
| 5.065985865                         | 10.61792598                               | 0.005632448                     | 26.51917185                         | 14713.66813                                |
| 5.204280917                         | 13.95803905                               | 0.005979583                     | 28.26564667                         | 22705.00901                                |
| 5.303199527                         | 12.99253916                               | 0.003786219                     | 34.47979098                         | 26902.75385                                |
| 4.941404864                         | 10.73730653                               | 0.006258605                     | 19.61186198                         | 11155.49879                                |
| 5.064113459                         | 13.70443013                               | 0.009599674                     | 22.40226369                         | 22149.19379                                |
| 4.724315435                         | 10.19933933                               | 0.007712745                     | 14.57394518                         | 4866.011202                                |
| 5.152533667                         | 15.21192673                               | 0.00492241                      | 24.13112204                         | 16796.05029                                |
| 5.366465236                         | 20.10958898                               | 0.004892766                     | 45.40615873                         | 57108.30537                                |
| 5.191102075                         | 13.78465055                               | 0.004875573                     | 25.61052098                         | 18798.72427                                |
| 4.789016121                         | 11.2585928                                | 0.008581788                     | 14.98003221                         | 7577.840864                                |
| 5.418678608                         | 15.73685671                               | 0.00358354                      | 37.60016917                         | 36721.43456                                |
| 5.164732265                         | 15.28077217                               | 0.004998421                     | 26.52923877                         | 18801.58923                                |
| 5.066637232                         | 11.36637951                               | 0.006031558                     | 23.53655939                         | 14313.46235                                |
| 4.818615118                         | 10.77003442                               | 0.00780127                      | 15.44310046                         | 7670.475748                                |
| 5.078555657                         | 13.14556553                               | 0.007922942                     | 23.51691893                         | 19286.95283                                |
| 5.073058476                         | 20.2639842                                | 0.006955349                     | 28.51832114                         | 27541.71907                                |
| 5.151632033                         | 13.25251208                               | 0.004834108                     | 25.25048717                         | 16254.17118                                |
| 4.919415073                         | 11.16236391                               | 0.01468087                      | 20.17576187                         | 16572.67488                                |
| 4.910397966                         | 13.35715662                               | 0.007594791                     | 18.13552772                         | 10124.55462                                |
| 5.295116915                         | 14.34121463                               | 0.004114389                     | 31.06203211                         | 25454.49222                                |
| 5.240572323                         | 19.93749546                               | 0.005411561                     | 30.86094142                         | 31612.91714                                |
| 4.923804299                         | 14.30772877                               | 0.009211794                     | 18.57983354                         | 12115.06462                                |
| 4.951528711                         | 13.75114736                               | 0.006564327                     | 17.88997043                         | 11239.47888                                |
| 5.133332698                         | 13.11243337                               | 0.005292073                     | 23.84507238                         | 17128.66392                                |
| 4.763380318                         | 12.89547916                               | 0.008192416                     | 13.64489515                         | 5255.85133                                 |
| 5.517497218                         | 17.32210587                               | 0.002848573                     | 41.15260976                         | 47710.82195                                |
| 5.224333831                         | 13.42996237                               | 0.004191082                     | 27.32584259                         | 18732.45542                                |
| 4.992138324                         | 15.1361442                                | 0.006891425                     | 25.35897323                         | 16682.16633                                |
| 4.725147761                         | 12.5269531                                | 0.009256382                     | 18.35373847                         | 8373.304603                                |
| 5.197301864                         | 17.5648866                                | 0.004710445                     | 25.59069663                         | 19105.79866                                |

| log.sigma.4.5.mm.3D_glc_m_SumAverage | log.sigma.4.5.mm.3D_glc_m_lmc2 | log.sigma.4.5.mm.3D_glc_m_lmc1 | log.sigma.4.5.mm.3D_glc_m_DifferenceAverage | log.sigma.4.5.mm.3D_glc_m_Id |
|--------------------------------------|--------------------------------|--------------------------------|---------------------------------------------|------------------------------|
| 31.32436243                          | 0.845726304                    | -0.143051584                   | 4.189388045                                 | 0.308918054                  |
| 33.01293819                          | 0.957782332                    | -0.276238562                   | 4.692996123                                 | 0.28262514                   |
| 33.08402927                          | 0.880520849                    | -0.172761979                   | 4.520896702                                 | 0.29473624                   |
| 32.87980614                          | 0.967140802                    | -0.294122402                   | 4.970891306                                 | 0.26875703                   |
| 25.70530014                          | 0.84583703                     | -0.148871457                   | 3.660089219                                 | 0.32757725                   |
| 31.20593422                          | 0.97117032                     | -0.320672364                   | 4.098740833                                 | 0.2987734                    |
| 22.43098274                          | 0.839127532                    | -0.167451788                   | 2.317352678                                 | 0.489951751                  |
| 30.2052916                           | 0.767718252                    | -0.111084648                   | 3.488224084                                 | 0.368244434                  |
| 22.88006558                          | 0.78892572                     | -0.135256063                   | 2.915145395                                 | 0.417666666                  |
| 22.52208265                          | 0.855735116                    | -0.166542554                   | 3.120541092                                 | 0.360197715                  |
| 18.4288509                           | 0.781364966                    | -0.145091812                   | 2.208818788                                 | 0.451994135                  |
| 22.5182602                           | 0.803551019                    | -0.140467829                   | 2.528971807                                 | 0.443854623                  |
| 30.25235182                          | 0.891017228                    | -0.178909096                   | 4.327259191                                 | 0.306232491                  |
| 30.40391039                          | 0.912346488                    | -0.195592217                   | 4.877890723                                 | 0.271561542                  |
| 22.95674464                          | 0.815589785                    | -0.138112224                   | 3.545941751                                 | 0.356570395                  |
| 25.19961131                          | 0.864043542                    | -0.177697292                   | 3.104389178                                 | 0.430714647                  |
| 18.09448964                          | 0.796344015                    | -0.139768303                   | 2.419015875                                 | 0.416095693                  |
| 30.10240664                          | 0.949330421                    | -0.251980933                   | 4.733975674                                 | 0.282999249                  |
| 18.24835629                          | 0.791672315                    | -0.148456055                   | 2.186010406                                 | 0.450354683                  |
| 44.67496346                          | 0.787536685                    | -0.126403884                   | 3.0133045                                   | 0.38763715                   |
| 25.98523931                          | 0.819885002                    | -0.140483746                   | 3.413447339                                 | 0.348600772                  |
| 28.18322983                          | 0.906341482                    | -0.203230605                   | 3.6850688                                   | 0.3296232                    |
| 25.02665022                          | 0.899716724                    | -0.197374903                   | 3.565108764                                 | 0.339130862                  |
| 21.35258658                          | 0.812575508                    | -0.156792098                   | 2.025457101                                 | 0.496514028                  |
| 34.13238413                          | 0.893629036                    | -0.193946033                   | 3.724687248                                 | 0.36598749                   |
| 34.69584113                          | 0.835714196                    | -0.146202531                   | 3.485103415                                 | 0.357785036                  |
| 29.51320887                          | 0.813357546                    | -0.135471492                   | 3.960002071                                 | 0.321908358                  |
| 22.80867176                          | 0.790769156                    | -0.131807263                   | 2.727224006                                 | 0.400033289                  |
| 18.88453332                          | 0.932135256                    | -0.294705918                   | 2.04951546                                  | 0.453852495                  |
| 24.58131797                          | 0.814764145                    | -0.140716836                   | 3.04097087                                  | 0.366433621                  |
| 25.53383853                          | 0.796757598                    | -0.131605901                   | 3.241041042                                 | 0.373732153                  |
| 33.06064172                          | 0.862452687                    | -0.158155211                   | 4.495803861                                 | 0.290072865                  |
| 26.75483585                          | 0.837806408                    | -0.150665404                   | 3.171661286                                 | 0.375819768                  |
| 27.2059074                           | 0.83864662                     | -0.156415947                   | 2.949138733                                 | 0.409777367                  |
| 25.45388908                          | 0.776542207                    | -0.119931018                   | 3.016477779                                 | 0.38997269                   |
| 31.48351713                          | 0.804557129                    | -0.125365165                   | 4.027861036                                 | 0.327207815                  |
| 36.26909456                          | 0.843388786                    | -0.150164982                   | 4.707533849                                 | 0.288887448                  |
| 27.7805343                           | 0.887675305                    | -0.191322761                   | 2.97887066                                  | 0.454098223                  |
| 21.76536011                          | 0.870367204                    | -0.186241774                   | 2.99411931                                  | 0.364588178                  |
| 39.28953697                          | 0.823514312                    | -0.152648179                   | 2.359060372                                 | 0.459660686                  |
| 25.8328751                           | 0.848608583                    | -0.151447148                   | 3.653420268                                 | 0.331662416                  |
| 23.40302692                          | 0.805080143                    | -0.158609128                   | 1.768308071                                 | 0.518352732                  |
| 33.34133183                          | 0.845630726                    | -0.156433513                   | 4.571923111                                 | 0.30074049                   |
| 26.31785701                          | 0.852761066                    | -0.153000919                   | 3.700206638                                 | 0.325118026                  |
| 23.780676                            | 0.850604287                    | -0.173117288                   | 2.405131232                                 | 0.457615542                  |
| 28.2970132                           | 0.801561077                    | -0.125272569                   | 3.79612531                                  | 0.335029347                  |
| 29.82168544                          | 0.779207941                    | -0.124333328                   | 2.728931331                                 | 0.414492027                  |
| 20.46243867                          | 0.848733177                    | -0.167038573                   | 2.911816188                                 | 0.373375395                  |
| 22.23712197                          | 0.94015266                     | -0.248413573                   | 3.44464677                                  | 0.34095628                   |
| 31.04349047                          | 0.920153189                    | -0.216196885                   | 3.9716711                                   | 0.304334356                  |
| 22.05503707                          | 0.84646621                     | -0.153781771                   | 3.514869736                                 | 0.348186114                  |
| 33.40534437                          | 0.806635056                    | -0.127324184                   | 3.571657436                                 | 0.339618127                  |
| 20.17683669                          | 0.826329972                    | -0.173697767                   | 1.754608526                                 | 0.549400002                  |
| 31.04070091                          | 0.815182369                    | -0.150894691                   | 2.760596626                                 | 0.404008419                  |
| 35.30532968                          | 0.925885697                    | -0.208876079                   | 4.934517407                                 | 0.270577747                  |
| 24.07691937                          | 0.85805856                     | -0.158281218                   | 3.761467911                                 | 0.322131441                  |
| 25.11114973                          | 0.808140519                    | -0.141614043                   | 2.962807782                                 | 0.403076574                  |
| 30.35418713                          | 0.773208492                    | -0.114674642                   | 3.756485072                                 | 0.329412326                  |
| 26.61991051                          | 0.845477196                    | -0.153099317                   | 3.572864968                                 | 0.33491809                   |
| 28.74881641                          | 0.843479147                    | -0.172257818                   | 2.129943703                                 | 0.509815597                  |
| 26.90516508                          | 0.813585732                    | -0.135465939                   | 3.393077148                                 | 0.352103338                  |
| 36.01417993                          | 0.822582285                    | -0.133970094                   | 3.844522175                                 | 0.324411251                  |
| 37.33396601                          | 0.774300128                    | -0.117848083                   | 3.506782904                                 | 0.361861633                  |
| 31.96468966                          | 0.841025609                    | -0.146865651                   | 3.478647968                                 | 0.345253971                  |
| 22.59533905                          | 0.834267304                    | -0.152376062                   | 3.235749633                                 | 0.352145959                  |
| 35.39662442                          | 0.781714731                    | -0.115551397                   | 3.763691394                                 | 0.323573453                  |
| 31.7057384                           | 0.925639675                    | -0.221612765                   | 4.3586692912                                | 0.292243423                  |
| 30.33057785                          | 0.781309309                    | -0.120683022                   | 3.270330842                                 | 0.362320578                  |
| 26.12319249                          | 0.810247513                    | -0.144238146                   | 2.446435974                                 | 0.429448265                  |
| 30.32319932                          | 0.800776696                    | -0.128364049                   | 3.321811897                                 | 0.35249903                   |
| 21.23585197                          | 0.899089553                    | -0.199122939                   | 3.770755089                                 | 0.322281864                  |
| 27.68944561                          | 0.798527006                    | -0.125857381                   | 3.4895181                                   | 0.377069188                  |
| 25.87041688                          | 0.834755267                    | -0.140580353                   | 4.186022309                                 | 0.307807323                  |
| 21.47045915                          | 0.833787696                    | -0.150927896                   | 3.092994555                                 | 0.362072403                  |
| 27.24220508                          | 0.85023451                     | -0.167361358                   | 2.646118618                                 | 0.436303967                  |
| 20.39867866                          | 0.808003648                    | -0.145835032                   | 2.791265768                                 | 0.377751796                  |
| 30.30884994                          | 0.816779791                    | -0.137249267                   | 3.173650494                                 | 0.360747404                  |
| 39.6049503                           | 0.965128089                    | -0.2881362                     | 5.29682091                                  | 0.262782586                  |
| 27.5397328                           | 0.844772373                    | -0.154443112                   | 3.283193841                                 | 0.347684694                  |
| 22.49687966                          | 0.797508872                    | -0.138084915                   | 2.506109727                                 | 0.423689123                  |
| 31.09302592                          | 0.850828252                    | -0.146596029                   | 4.14261571                                  | 0.310789929                  |
| 30.49874886                          | 0.870110886                    | -0.17148231                    | 3.462654838                                 | 0.33575181                   |
| 22.70766218                          | 0.801587399                    | -0.137937354                   | 3.437544732                                 | 0.369013471                  |
| 21.53587334                          | 0.775022649                    | -0.12685028                    | 2.678407401                                 | 0.399413837                  |
| 26.20771355                          | 0.837529302                    | -0.155621744                   | 2.898891634                                 | 0.407938685                  |
| 40.17050825                          | 0.907703203                    | -0.205635665                   | 4.028672975                                 | 0.320122596                  |
| 26.45273449                          | 0.825272716                    | -0.1427723701                  | 3.403941603                                 | 0.35269851                   |
| 22.28202572                          | 0.85528665                     | -0.170765257                   | 2.520259929                                 | 0.467408857                  |
| 26.67447215                          | 0.792818903                    | -0.13053663                    | 2.884569718                                 | 0.392089442                  |
| 28.52737676                          | 0.851730266                    | -0.151893732                   | 3.667565655                                 | 0.33146689                   |
| 39.53910454                          | 0.889471455                    | -0.185614448                   | 3.657435191                                 | 0.342407408                  |
| 28.53147903                          | 0.829838531                    | -0.157660027                   | 2.626262457                                 | 0.423773946                  |
| 27.4525666                           | 0.788730523                    | -0.129184242                   | 2.659479357                                 | 0.399956193                  |
| 26.14183517                          | 0.806817361                    | -0.133641188                   | 3.067753814                                 | 0.374717359                  |
| 25.79095832                          | 0.779189628                    | -0.13805152                    | 2.360740606                                 | 0.418930792                  |
| 34.18561151                          | 0.82157104                     | -0.12924582                    | 4.521722482                                 | 0.294050249                  |
| 26.80812706                          | 0.798180707                    | -0.129184741                   | 3.46930133                                  | 0.34255496                   |
| 30.26766438                          | 0.934611182                    | -0.244872645                   | 3.639773781                                 | 0.331797881                  |
| 25.05390621                          | 0.912923766                    | -0.227686831                   | 3.343757587                                 | 0.344082978                  |
| 34.81284882                          | 0.752219686                    | -0.109867382                   | 3.376334056                                 | 0.363360824                  |

| log.sigma.4.5.mm.3D_glcm_ClusterTendency | log.sigma.4.5.mm.3D_firstorder_InterquartileRange | log.sigma.4.5.mm.3D_firstorder_Skewness | log.sigma.4.5.mm.3D_firstorder_Uniformity |
|------------------------------------------|---------------------------------------------------|-----------------------------------------|-------------------------------------------|
| 117.4966544                              | 215.8722219                                       | 0.286200923                             | 0.045587434                               |
| 122.3023735                              | 201.1596947                                       | -0.358670224                            | 0.048542883                               |
| 103.1080991                              | 231.936697                                        | -0.14712694                             | 0.046338656                               |
| 133.0257923                              | 218.390274                                        | -0.214660182                            | 0.044153389                               |
| 102.5582348                              | 211.290844                                        | -0.041513274                            | 0.050114997                               |
| 121.2942292                              | 231.8377361                                       | -0.247410521                            | 0.047537736                               |
| 56.27377734                              | 101.6312819                                       | 0.707985462                             | 0.086702546                               |
| 84.25526336                              | 166.4491291                                       | 0.541736471                             | 0.056528157                               |
| 68.86603994                              | 133.9017658                                       | 0.755656299                             | 0.068878421                               |
| 68.69707886                              | 186.8483696                                       | 0.142220156                             | 0.057336082                               |
| 35.69469524                              | 105.9689445                                       | 0.485934752                             | 0.09315214                                |
| 54.72488577                              | 111.2553444                                       | 0.510869658                             | 0.076714673                               |
| 121.7249984                              | 244.9563599                                       | -0.402588465                            | 0.047717801                               |
| 135.0808923                              | 251.75105                                         | -0.33910258                             | 0.043695266                               |
| 81.25141497                              | 174.8320031                                       | 0.629920073                             | 0.057125523                               |
| 78.89412854                              | 160.7867393                                       | 0.356983964                             | 0.064045987                               |
| 39.51712212                              | 128.4275436                                       | 0.143640427                             | 0.075159455                               |
| 138.12392                                | 247.4715977                                       | -0.195284398                            | 0.045785236                               |
| 33.69798291                              | 97.68639994                                       | 0.312772715                             | 0.091509614                               |
| 77.93693303                              | 151.3755035                                       | 0.423609559                             | 0.061416877                               |
| 90.71646196                              | 207.6552258                                       | -0.141335094                            | 0.052122191                               |
| 89.56678205                              | 172.843317                                        | -0.529500334                            | 0.058622203                               |
| 83.01009589                              | 173.6449661                                       | -0.030875679                            | 0.055568402                               |
| 38.50813817                              | 82.51060867                                       | 0.490894591                             | 0.103749928                               |
| 101.8637157                              | 203.8037186                                       | 0.133932741                             | 0.049902386                               |
| 97.21960469                              | 198.168642                                        | 0.486289951                             | 0.052219638                               |
| 92.09630832                              | 206.5096693                                       | 0.312726227                             | 0.051082466                               |
| 56.56352161                              | 151.0121975                                       | 0.265650671                             | 0.065471318                               |
| 31.40874801                              | 113.455143                                        | 0.251498686                             | 0.09316945                                |
| 64.07900011                              | 158.3023729                                       | 0.183482886                             | 0.061738359                               |
| 80.89324265                              | 184.4765739                                       | 0.457402538                             | 0.055731986                               |
| 102.6692244                              | 233.7609792                                       | -0.361843488                            | 0.0489706                                 |
| 88.91810066                              | 168.0486546                                       | 0.52137899                              | 0.056377534                               |
| 74.13820472                              | 168.3302212                                       | 0.390882089                             | 0.062838625                               |
| 73.29491624                              | 167.9308243                                       | 0.547157897                             | 0.060988992                               |
| 99.44559444                              | 206.8348274                                       | -0.301102336                            | 0.04965395                                |
| 116.0972018                              | 212.7615428                                       | -0.493435354                            | 0.046864065                               |
| 84.94500576                              | 138.9132233                                       | 0.368864905                             | 0.074183212                               |
| 59.35751147                              | 151.1861639                                       | -0.452988726                            | 0.069885204                               |
| 58.82378291                              | 118.8156338                                       | 0.519066525                             | 0.076721978                               |
| 98.81600912                              | 219.0284119                                       | 0.178868201                             | 0.049345066                               |
| 31.65369333                              | 75.15871525                                       | 0.640936862                             | 0.114844703                               |
| 123.2020128                              | 235.1526871                                       | 0.08489389                              | 0.043653848                               |
| 103.1595601                              | 206.2682791                                       | 0.278185873                             | 0.049101369                               |
| 53.08564848                              | 101.7474365                                       | 0.408266512                             | 0.085069984                               |
| 96.04485643                              | 199.113266                                        | 0.202832127                             | 0.050300262                               |
| 58.23230801                              | 140.612175                                        | 0.342470017                             | 0.067456971                               |
| 48.55398142                              | 132.984477                                        | -0.266494984                            | 0.074767402                               |
| 99.3784275                               | 171.6097298                                       | 0.320772101                             | 0.056351018                               |
| 98.21917104                              | 189.3289394                                       | -0.336912963                            | 0.053430182                               |
| 90.21304467                              | 207.9057102                                       | 0.489894149                             | 0.05335345                                |
| 94.08118505                              | 191.8902054                                       | 0.267573694                             | 0.051714977                               |
| 33.86967417                              | 73.4396348                                        | 0.683252462                             | 0.119035265                               |
| 52.46357167                              | 137.0674362                                       | 0.319445111                             | 0.070148552                               |
| 147.1973608                              | 261.7423134                                       | -0.340290749                            | 0.041086083                               |
| 104.1317339                              | 223.0864468                                       | 0.193426883                             | 0.047785356                               |
| 72.93914457                              | 157.8235569                                       | 0.505515072                             | 0.061723146                               |
| 82.91901653                              | 219.5047607                                       | 0.042429807                             | 0.051663328                               |
| 74.77900803                              | 181.764254                                        | -0.210601985                            | 0.056469857                               |
| 47.87631714                              | 105.3938522                                       | 0.310049026                             | 0.092192737                               |
| 74.03544062                              | 170.2033806                                       | 0.326539631                             | 0.057423081                               |
| 107.8683842                              | 210.671875                                        | 0.126095697                             | 0.046983942                               |
| 95.84686959                              | 194.5787544                                       | 0.28517668                              | 0.051682453                               |
| 101.887594                               | 175.2893696                                       | 0.031091234                             | 0.051665113                               |
| 58.01393415                              | 166.2095032                                       | 0.009350797                             | 0.060447844                               |
| 91.44948807                              | 195.5234528                                       | 0.104367337                             | 0.050471062                               |
| 98.21711764                              | 188.137759                                        | -0.60519707                             | 0.055267053                               |
| 82.47334149                              | 170.4155121                                       | 0.515179604                             | 0.057781645                               |
| 58.49382782                              | 144.5851545                                       | 0.391667805                             | 0.069048706                               |
| 77.52377508                              | 178.0791512                                       | -0.088795761                            | 0.056091977                               |
| 83.92626222                              | 219.7407894                                       | -0.051969571                            | 0.053225593                               |
| 86.39727841                              | 153.1845665                                       | 0.296052681                             | 0.060097433                               |
| 107.3366569                              | 253.429882                                        | 0.15780451                              | 0.047382906                               |
| 62.6151449                               | 169.0565591                                       | 0.319261285                             | 0.06014626                                |
| 73.21241493                              | 112.790103                                        | 0.750914878                             | 0.075461945                               |
| 46.09551364                              | 149.7757397                                       | -0.052884947                            | 0.070279237                               |
| 78.00635549                              | 185.0237198                                       | -0.01370184                             | 0.055466126                               |
| 140.1900145                              | 210.8889084                                       | -0.793057455                            | 0.050772077                               |
| 84.04302455                              | 175.0535107                                       | -0.058202562                            | 0.054889907                               |
| 47.80282401                              | 131.4986758                                       | 0.220058127                             | 0.073815432                               |
| 117.4314029                              | 213.7245393                                       | 0.292287689                             | 0.046054402                               |
| 85.64497418                              | 186.2025242                                       | -0.390003687                            | 0.055880611                               |
| 72.58200077                              | 184.2630348                                       | 0.229051422                             | 0.057052834                               |
| 49.35819988                              | 132.8081183                                       | 0.262953582                             | 0.07111111                                |
| 76.05463792                              | 140.586647                                        | 0.4921037                               | 0.066191305                               |
| 89.87602835                              | 154.6829185                                       | -0.939403851                            | 0.07057359                                |
| 80.00837077                              | 183.7576685                                       | 0.069035224                             | 0.055753117                               |
| 65.74461718                              | 111.9811001                                       | 0.59434281                              | 0.078629302                               |
| 56.96827521                              | 141.4081116                                       | 0.191982946                             | 0.068154051                               |
| 99.02216768                              | 198.0186272                                       | 0.09074765                              | 0.050286056                               |
| 100.3714943                              | 190.4008541                                       | -0.172086353                            | 0.052681246                               |
| 59.08526098                              | 121.0516577                                       | 0.221530838                             | 0.072794923                               |
| 58.54349599                              | 148.5270958                                       | 0.312565856                             | 0.066595831                               |
| 77.47216143                              | 170.2910118                                       | 0.390851717                             | 0.058966817                               |
| 45.29286388                              | 140.4253597                                       | 0.148972981                             | 0.072094829                               |
| 130.9149539                              | 251.4870319                                       | 0.096030835                             | 0.041582798                               |
| 88.18354338                              | 210.4916553                                       | 0.098699892                             | 0.051239924                               |
| 79.84207921                              | 180.7094202                                       | -0.539700619                            | 0.061988997                               |
| 55.63320162                              | 138.2575579                                       | -0.751452019                            | 0.078107596                               |
| 81.25986345                              | 176.7824936                                       | 0.12735744                              | 0.054627221                               |

| log.sigma.4.5.mm.3D_firstorder_MeanAbsoluteDeviation | log.sigma.4.5.mm.3D_firstorder_Energy | log.sigma.4.5.mm.3D_firstorder_RobustMeanAbsoluteDeviation | log.sigma.4.5.mm.3D_firstorder_Median |
|------------------------------------------------------|---------------------------------------|------------------------------------------------------------|---------------------------------------|
| 126.2875731                                          | 41629000.21                           | 90.66038432                                                | -82.15223312                          |
| 127.1896045                                          | 9551874.19                            | 89.79087701                                                | -29.14000893                          |
| 124.6066729                                          | 20332628.39                           | 92.77899641                                                | -3.850627422                          |
| 133.6716062                                          | 9691246.711                           | 93.09064908                                                | -36.610466                            |
| 116.7679978                                          | 28208821.61                           | 86.14970756                                                | 6.102658749                           |
| 128.3568833                                          | 5798871.224                           | 95.41498205                                                | 24.47251034                           |
| 75.31902084                                          | 113567746.1                           | 46.64408873                                                | -12.03291321                          |
| 102.69245                                            | 111242730.7                           | 69.63347207                                                | -38.91337967                          |
| 89.35051668                                          | 60108883.21                           | 58.8390316                                                 | -33.02248383                          |
| 100.9915931                                          | 11617695.93                           | 75.62547023                                                | 27.36987305                           |
| 64.77636834                                          | 11056452.58                           | 43.96679072                                                | 5.362624407                           |
| 78.71403082                                          | 37532971.19                           | 50.16910368                                                | -7.688241482                          |
| 131.8049522                                          | 21890594.68                           | 98.72223465                                                | -14.5739603                           |
| 137.7941136                                          | 24617710.77                           | 101.9031687                                                | -81.46355057                          |
| 102.5276015                                          | 33294754.67                           | 72.21029751                                                | -81.49008942                          |
| 96.62910339                                          | 89069746.66                           | 66.4265066                                                 | -4.573322535                          |
| 74.15841482                                          | 7385031.182                           | 53.04071834                                                | -4.353944778                          |
| 136.3158982                                          | 16040497.06                           | 97.85392458                                                | -84.36707306                          |
| 63.92283113                                          | 8539254.62                            | 41.43160712                                                | -31.73624802                          |
| 94.33390379                                          | 142373477.3                           | 62.67377237                                                | 14.27113342                           |
| 112.2299112                                          | 37516105.95                           | 83.81360219                                                | 13.69747925                           |
| 104.4231107                                          | 8550835.604                           | 72.13519041                                                | 7.749946117                           |
| 103.9590617                                          | 9943047.819                           | 73.324557                                                  | -34.69402122                          |
| 61.48843305                                          | 26940141.06                           | 37.36859093                                                | -15.33845139                          |
| 118.3176613                                          | 29536865.64                           | 84.92251804                                                | -55.42731094                          |
| 115.2751581                                          | 51785076.89                           | 81.87349802                                                | -24.21371174                          |
| 115.5260749                                          | 47004299.75                           | 84.2137357                                                 | -74.68105698                          |
| 86.47002556                                          | 29858958.42                           | 61.92448808                                                | -45.28836441                          |
| 66.13609691                                          | 1332764.775                           | 48.02453422                                                | 38.86591148                           |
| 92.31233403                                          | 22116196.63                           | 65.42892694                                                | -22.17314339                          |
| 104.1691759                                          | 71413458.56                           | 75.57840935                                                | -54.37331009                          |
| 123.4139296                                          | 25575507.65                           | 94.15597456                                                | -86.32854843                          |
| 103.9895595                                          | 41573614.83                           | 71.55900322                                                | -40.45474243                          |
| 94.63003915                                          | 33981497.61                           | 68.88994735                                                | -21.85883141                          |
| 97.10465911                                          | 76157080.34                           | 68.19684034                                                | -32.11759949                          |
| 115.1176863                                          | 40298345.07                           | 83.88899407                                                | -25.37987518                          |
| 125.9178752                                          | 47577824.5                            | 88.95454944                                                | -61.60402489                          |
| 96.10543166                                          | 95519218.74                           | 63.30655891                                                | -2.882350445                          |
| 86.36089453                                          | 7521072.991                           | 62.36780956                                                | -31.73837566                          |
| 77.78651217                                          | 104839512                             | 50.14637534                                                | -16.65729904                          |
| 118.1247119                                          | 34854940.53                           | 88.90339948                                                | -82.85037231                          |
| 54.23303593                                          | 32975183.43                           | 32.57009052                                                | 2.674381852                           |
| 130.6969495                                          | 61114381.1                            | 95.42800378                                                | -14.4575367                           |
| 115.760617                                           | 31478458.93                           | 84.84754177                                                | -51.9143486                           |
| 73.70536049                                          | 16278481.96                           | 44.21006248                                                | -9.642529964                          |
| 113.4943922                                          | 45282692.24                           | 83.1476398                                                 | -17.81309891                          |
| 84.68804859                                          | 61617375.35                           | 58.82620021                                                | -12.20396328                          |
| 79.30729736                                          | 5930221.196                           | 54.6752116                                                 | -32.88395691                          |
| 105.3019595                                          | 7018331.298                           | 71.82208978                                                | 1.273204327                           |
| 109.9092234                                          | 8450732.458                           | 78.32811654                                                | -1.093531907                          |
| 115.3137962                                          | 29796678.73                           | 86.0337833                                                 | -85.51422119                          |
| 110.7329298                                          | 55594336.22                           | 78.48810668                                                | 20.3700695                            |
| 56.13116812                                          | 52579626.9                            | 32.72997815                                                | -5.248245239                          |
| 81.90267969                                          | 18585206.47                           | 56.49201927                                                | -29.2678833                           |
| 144.1245366                                          | 19628415.77                           | 105.925987                                                 | 16.25004959                           |
| 119.7156435                                          | 25019157.19                           | 89.30358175                                                | -25.98683548                          |
| 94.59537392                                          | 57885046.38                           | 66.64741751                                                | -24.31864166                          |
| 114.7881179                                          | 42387645.35                           | 89.83029012                                                | -56.14371109                          |
| 102.7121503                                          | 17539371.26                           | 75.32519575                                                | -73.31077576                          |
| 69.5441113                                           | 99207934.17                           | 43.52142124                                                | 2.393574715                           |
| 99.00565776                                          | 20680470.13                           | 70.03121112                                                | -30.34967041                          |
| 119.7989725                                          | 55590311.38                           | 84.98983396                                                | 14.76950455                           |
| 112.8855581                                          | 160801764.1                           | 80.3317466                                                 | -7.468591452                          |
| 110.6147782                                          | 41308434.31                           | 75.23756607                                                | -2.992911935                          |
| 93.01799071                                          | 8994290.872                           | 67.79140092                                                | -25.87529755                          |
| 112.8059397                                          | 66826293.19                           | 80.81343946                                                | -8.565422058                          |
| 114.3701517                                          | 13512436.41                           | 82.05608396                                                | -86.2492485                           |
| 101.7011369                                          | 88165310.89                           | 70.49146452                                                | -46.94897461                          |
| 83.76910985                                          | 83127047.17                           | 59.41545228                                                | -9.811391354                          |
| 101.2934773                                          | 33478578.54                           | 72.6472882                                                 | 27.7800293                            |
| 114.8381849                                          | 10126415.46                           | 89.52782697                                                | -48.70801353                          |
| 100.0974403                                          | 85180642.54                           | 67.25496476                                                | -11.83949471                          |
| 129.0874966                                          | 33719329.39                           | 101.0561476                                                | -53.37219238                          |
| 95.02130595                                          | 16198757.18                           | 69.36626597                                                | -68.16340637                          |
| 82.82595093                                          | 53700042.53                           | 51.08342922                                                | -19.89728832                          |
| 81.00035124                                          | 8547788.776                           | 60.92295893                                                | 0.73826474                            |
| 102.5192127                                          | 34896770.97                           | 74.48451388                                                | -4.597083569                          |
| 133.4962975                                          | 11168564.61                           | 89.71795708                                                | -36.67100143                          |
| 102.4472504                                          | 23129547.08                           | 72.3974223                                                 | 41.94659042                           |
| 77.39665673                                          | 21451209.21                           | 53.94155392                                                | -44.99217033                          |
| 125.04263                                            | 40694786.05                           | 89.2740762                                                 | -85.34717941                          |
| 105.0357192                                          | 14036021.04                           | 76.24503535                                                | -8.901975632                          |
| 102.2259794                                          | 38992666.62                           | 75.52492436                                                | -43.41969109                          |
| 80.07018799                                          | 25336435                              | 55.83759852                                                | -63.57894516                          |
| 91.36728183                                          | 39246472.45                           | 59.17634493                                                | -18.74855232                          |
| 107.9488513                                          | 11050129.62                           | 70.03430397                                                | 1.84559083                            |
| 102.0839748                                          | 22743385.61                           | 74.67014283                                                | -50.78513145                          |
| 82.96875837                                          | 49608381.16                           | 51.31888144                                                | -8.334357262                          |
| 85.88513332                                          | 20892846.86                           | 59.09148283                                                | -34.5397377                           |
| 114.2428469                                          | 26866198.78                           | 82.43776678                                                | 3.771320343                           |
| 112.6460685                                          | 16726512.91                           | 77.67187388                                                | 15.55898142                           |
| 80.6724102                                           | 30074091.91                           | 52.39531145                                                | -23.39423466                          |
| 85.60032208                                          | 51624222.66                           | 61.52167878                                                | -21.3514843                           |
| 97.49802352                                          | 51157003.1                            | 69.13430651                                                | 2.432986856                           |
| 78.21399439                                          | 30037210.86                           | 57.35549228                                                | -12.61081028                          |
| 137.5402387                                          | 67063567.38                           | 101.8702356                                                | -19.32508659                          |
| 112.1558647                                          | 43657833.41                           | 84.90382064                                                | -1.926961422                          |
| 103.247057                                           | 8878141.039                           | 75.7138324                                                 | -105.2157898                          |
| 84.53462947                                          | 3159020.687                           | 59.15093025                                                | -4.108203173                          |
| 103.2529395                                          | 151481307.9                           | 72.83390731                                                | 18.08364487                           |

| log.sigma.4.5.mm.3D_firstorder_TotalEnergy | log.sigma.4.5.mm.3D_firstorder_Maximum | log.sigma.4.5.mm.3D_firstorder_RootMeanSquared | log.sigma.4.5.mm.3D_firstorder_90Percentile | log.sigma.4.5.mm.3D_firstorder_Minimum |
|--------------------------------------------|----------------------------------------|------------------------------------------------|---------------------------------------------|----------------------------------------|
| 1123983006                                 | 365.2684326                            | 169.7908935                                    | 156.2331223                                 | -446.6054993                           |
| 257900603.1                                | 285.3490601                            | 165.9126727                                    | 134.7167603                                 | -462.9414673                           |
| 548980966.6                                | 379.4460449                            | 150.9782317                                    | 177.3081116                                 | -424.7848511                           |
| 261663661.2                                | 319.4423218                            | 173.4849834                                    | 172.4765549                                 | -459.9526672                           |
| 761638183.4                                | 366.1048889                            | 141.3933438                                    | 173.6889343                                 | -309.5161438                           |
| 156569523.1                                | 307.5657349                            | 154.797538                                     | 211.2646408                                 | -361.1671143                           |
| 3066329144                                 | 587.9163208                            | 103.8072775                                    | 134.1006409                                 | -269.3961487                           |
| 3003553730                                 | 437.4927673                            | 135.3982448                                    | 143.1502762                                 | -381.9958191                           |
| 1622939847                                 | 398.8898926                            | 118.7579267                                    | 151.4506119                                 | -288.1237488                           |
| 313677790.2                                | 334.0865784                            | 124.0470747                                    | 199.8974396                                 | -236.7127686                           |
| 298524219.6                                | 318.7491455                            | 84.29525085                                    | 134.9668884                                 | -199.7857056                           |
| 1013390222                                 | 398.8483582                            | 104.9591744                                    | 138.1597778                                 | -269.7941589                           |
| 591046056.3                                | 305.4080811                            | 164.2927325                                    | 131.4755707                                 | -424.9298401                           |
| 664678190.9                                | 282.3500977                            | 195.5153676                                    | 91.24611511                                 | -492.0541077                           |
| 898958376                                  | 419.7257996                            | 145.3943836                                    | 113.8453903                                 | -328.5666504                           |
| 2404883160                                 | 435.1111755                            | 124.3307294                                    | 185.5620789                                 | -276.8880615                           |
| 199395841.9                                | 234.8946991                            | 91.45254902                                    | 119.6630615                                 | -208.3825378                           |
| 433093420.5                                | 308.5021973                            | 198.0374187                                    | 112.7004257                                 | -484.0950928                           |
| 230559874.7                                | 231.5220795                            | 88.34893541                                    | 84.16169357                                 | -231.7221985                           |
| 3844083888                                 | 505.6256409                            | 124.5151666                                    | 177.1589478                                 | -519.8388672                           |
| 1012934861                                 | 302.1151123                            | 134.3649841                                    | 167.7163696                                 | -304.9135132                           |
| 230872561.3                                | 253.6251373                            | 131.2996112                                    | 146.0235901                                 | -359.3850708                           |
| 268462291.1                                | 334.4221802                            | 133.4881347                                    | 128.9358307                                 | -346.1117249                           |
| 727383808.6                                | 318.2867432                            | 86.54255521                                    | 91.41903687                                 | -254.7512054                           |
| 797495372.3                                | 354.7940674                            | 155.089723                                     | 158.4053482                                 | -454.6213379                           |
| 1398197076                                 | 479.6351013                            | 142.3383372                                    | 205.7446823                                 | -403.307251                            |
| 1269116093                                 | 394.2582092                            | 153.1510346                                    | 131.5734146                                 | -420.7366028                           |
| 806191877.3                                | 309.1767883                            | 115.1215773                                    | 96.44415436                                 | -306.9285278                           |
| 35984648.92                                | 277.8617859                            | 95.54331925                                    | 160.3169556                                 | -162.7783966                           |
| 597137309                                  | 367.1120911                            | 117.2039594                                    | 122.9530411                                 | -304.7332458                           |
| 1928163381                                 | 386.0854492                            | 133.4664181                                    | 143.0665924                                 | -339.5946655                           |
| 690538706.5                                | 192.3185272                            | 180.1561211                                    | 75.14476471                                 | -501.0004883                           |
| 1122487600                                 | 500.2604675                            | 133.4336763                                    | 158.4018036                                 | -349.1410217                           |
| 917500435.4                                | 435.7871704                            | 118.6213029                                    | 148.4363342                                 | -339.9953003                           |
| 2056241169                                 | 407.1003113                            | 121.8062326                                    | 156.340567                                  | -322.4985657                           |
| 1088055317                                 | 289.4875793                            | 144.1632954                                    | 142.7469238                                 | -418.0013123                           |
| 1284601262                                 | 274.922412                             | 177.3888811                                    | 102.8662148                                 | -535.5915527                           |
| 2579018906                                 | 488.9932251                            | 128.0992483                                    | 170.1578827                                 | -337.7251892                           |
| 203068970.8                                | 187.712738                             | 115.8899801                                    | 76.65620422                                 | -319.1589355                           |
| 2830666823                                 | 498.0964355                            | 105.3453906                                    | 110.9777756                                 | -478.901001                            |
| 941083394.4                                | 355.9929504                            | 161.2797249                                    | 109.8020493                                 | -385.6427917                           |
| 890329952.6                                | 425.6733398                            | 76.24748074                                    | 101.5299278                                 | -270.3477173                           |
| 1650088290                                 | 416.3406982                            | 158.980391                                     | 191.5162201                                 | -406.6893005                           |
| 849918391.2                                | 391.3850708                            | 148.8889815                                    | 142.9666901                                 | -363.2185974                           |
| 439519012.8                                | 396.4577026                            | 102.2826932                                    | 108.3019028                                 | -279.4659119                           |
| 1222632690                                 | 384.0218506                            | 137.3314608                                    | 182.3811152                                 | -333.2056274                           |
| 1663669134                                 | 403.5235291                            | 107.3084995                                    | 129.5246277                                 | -352.7030945                           |
| 160115972.3                                | 212.2731628                            | 109.8992428                                    | 70.85919189                                 | -288.1540833                           |
| 189494945                                  | 407.7485352                            | 133.9764771                                    | 186.3307648                                 | -271.2696533                           |
| 228169776.4                                | 272.4865723                            | 136.7344534                                    | 165.1395187                                 | -376.4799805                           |
| 804510325.8                                | 345.4647217                            | 152.1579526                                    | 133.2076752                                 | -345.7606812                           |
| 1501047078                                 | 438.3114624                            | 141.2871533                                    | 222.5639648                                 | -366.1922302                           |
| 1419649926                                 | 406.5428772                            | 81.19254924                                    | 80.58870697                                 | -240.8397064                           |
| 501800574.8                                | 342.3522339                            | 106.389096                                     | 110.2597595                                 | -379.0549316                           |
| 529967225.9                                | 353.4859619                            | 174.7177941                                    | 222.3915752                                 | -438.4941101                           |
| 675517244.2                                | 365.5485535                            | 145.8588137                                    | 174.0997467                                 | -315.2420044                           |
| 1562896252                                 | 441.5848389                            | 120.0716332                                    | 145.9194611                                 | -313.2977295                           |
| 1144466424                                 | 285.6445313                            | 143.2021069                                    | 130.1380219                                 | -417.366272                            |
| 473563023.9                                | 207.9799957                            | 151.6158976                                    | 76.62192535                                 | -417.509552                            |
| 2678614223                                 | 445.4104309                            | 95.43319227                                    | 111.440715                                  | -332.9145813                           |
| 558372693.4                                | 399.1328125                            | 124.7434391                                    | 140.8481079                                 | -341.3734741                           |
| 1500938407                                 | 498.3861389                            | 150.1727354                                    | 218.8277679                                 | -410.2076721                           |
| 4341647630                                 | 537.0307617                            | 139.746189                                     | 203.511824                                  | -431.7410583                           |
| 1115327726                                 | 463.5197144                            | 140.3859768                                    | 179.1326447                                 | -392.7488708                           |
| 242845853.5                                | 300.6739807                            | 115.2627906                                    | 137.8556366                                 | -295.9246826                           |
| 1804309916                                 | 468.9857178                            | 139.764588                                     | 165.095108                                  | -443.7076111                           |
| 364835783.1                                | 142.4747314                            | 182.4331743                                    | 44.00465393                                 | -509.8379517                           |
| 2380463394                                 | 458.9565735                            | 131.67502                                      | 148.2902222                                 | -398.5006104                           |
| 2244430274                                 | 419.4129639                            | 105.2226039                                    | 121.2527199                                 | -319.174469                            |
| 903921620.5                                | 341.7781982                            | 125.5469738                                    | 176.1982529                                 | -347.7939453                           |
| 273413217.4                                | 243.6112366                            | 143.4647875                                    | 110.469268                                  | -313.6329041                           |
| 2299877349                                 | 445.3247986                            | 130.7712229                                    | 159.0355988                                 | -348.3626404                           |
| 910421893.4                                | 365.125824                             | 158.9274194                                    | 145.8855072                                 | -355.6448669                           |
| 437366443.9                                | 325.8642883                            | 130.5807158                                    | 100.5019028                                 | -307.234375                            |
| 1449901148                                 | 529.9769287                            | 114.6685836                                    | 135.4204819                                 | -346.795929                            |
| 230790296.9                                | 241.072464                             | 96.49516438                                    | 124.1625282                                 | -241.5798035                           |
| 942212816.2                                | 394.5853882                            | 125.6882744                                    | 150.4221222                                 | -370.3876038                           |
| 301551244.5                                | 212.4853058                            | 185.9505295                                    | 98.75358276                                 | -588.5628052                           |
| 624497771.2                                | 362.9626465                            | 132.623562                                     | 205.0758087                                 | -297.8050842                           |
| 579182648.7                                | 368.5841064                            | 109.1665629                                    | 75.60513382                                 | -320.7987976                           |
| 1098759223                                 | 365.2684326                            | 170.1283635                                    | 152.1841125                                 | -446.6054993                           |
| 378972568                                  | 258.8144531                            | 130.3562869                                    | 128.8882141                                 | -381.6014709                           |
| 1052801999                                 | 353.8748779                            | 130.7174744                                    | 126.5399521                                 | -317.6835632                           |
| 684083745                                  | 329.191803                             | 115.690433                                     | 80.09520874                                 | -320.7798157                           |
| 1059654756                                 | 403.6074829                            | 120.2307059                                    | 156.960144                                  | -301.658905                            |
| 298353499.9                                | 287.0888367                            | 144.2568437                                    | 87.77764893                                 | -534.0634766                           |
| 614071411.4                                | 313.3414307                            | 113.8632226                                    | 113.5973                                    | -374.6351013                           |
| 1339426291                                 | 431.711731                             | 113.7203607                                    | 151.640213                                  | -259.2255554                           |
| 564106865.1                                | 354.9901733                            | 110.8272747                                    | 126.9618378                                 | -326.9352112                           |
| 725387367.1                                | 390.4516907                            | 140.1905871                                    | 179.5937012                                 | -338.5934143                           |
| 451615848.5                                | 311.4137268                            | 144.2363357                                    | 223.1367813                                 | -460.9602966                           |
| 812000481.5                                | 324.5696716                            | 108.9844183                                    | 107.699749                                  | -353.3699036                           |
| 1393854012                                 | 431.1026001                            | 107.0957548                                    | 118.8392029                                 | -334.9816895                           |
| 1381239084                                 | 462.4424133                            | 121.8414085                                    | 181.4253311                                 | -298.5203857                           |
| 811004693.2                                | 278.3428955                            | 95.30434572                                    | 122.0404892                                 | -300.1594543                           |
| 1810716319                                 | 479.2290955                            | 167.7220648                                    | 191.1331055                                 | -442.5575867                           |
| 1178761502                                 | 389.5835876                            | 133.435337                                     | 178.6788437                                 | -304.612854                            |
| 239709808                                  | 142.1698456                            | 168.418134                                     | 28.9038681                                  | -483.2492676                           |
| 85293558.55                                | 189.2019043                            | 108.56975                                      | 85.55787354                                 | -331.1756287                           |
| 4089995313                                 | 426.0587463                            | 131.022769                                     | 192.7611725                                 | -376.0505981                           |

| log.sigma.4.5.mm.3D_firstorder_Entropy | log.sigma.4.5.mm.3D_firstorder_StandardDeviation | log.sigma.4.5.mm.3D_firstorder_Range | log.sigma.4.5.mm.3D_firstorder_Variance | log.sigma.4.5.mm.3D_firstorder_10Percentile |
|----------------------------------------|--------------------------------------------------|--------------------------------------|-----------------------------------------|---------------------------------------------|
| 4.627928637                            | 155.2804538                                      | 811.8739319                          | 24112.01933                             | -261.5632477                                |
| 4.574238296                            | 157.9242965                                      | 748.2905273                          | 24940.08343                             | -283.6489502                                |
| 4.566714472                            | 150.2009141                                      | 804.230896                           | 22560.31461                             | -225.1717087                                |
| 4.695807284                            | 165.8024498                                      | 779.394989                           | 27490.45236                             | -282.6743683                                |
| 4.469993409                            | 141.2596829                                      | 675.6210327                          | 19954.29801                             | -211.6893311                                |
| 4.527153793                            | 154.1369466                                      | 668.7328491                          | 23758.19829                             | -208.0798843                                |
| 3.951988871                            | 103.3856032                                      | 857.3124695                          | 10688.58295                             | -134.1960175                                |
| 4.39277538                             | 131.6709221                                      | 819.4885864                          | 17337.23173                             | -191.6187057                                |
| 4.154389435                            | 116.9409886                                      | 687.0136414                          | 13675.19482                             | -159.3541412                                |
| 4.241828783                            | 120.7276118                                      | 570.7993469                          | 14575.15624                             | -129.6558899                                |
| 3.711724845                            | 82.41517454                                      | 518.5348511                          | 6792.260994                             | -82.55833817                                |
| 4.037800639                            | 104.9463411                                      | 668.6425171                          | 11013.7345                              | -136.5623871                                |
| 4.567731089                            | 156.995305                                       | 730.3379211                          | 24647.52581                             | -288.2608337                                |
| 4.661253921                            | 165.5088371                                      | 774.4042053                          | 27393.17516                             | -347.6722107                                |
| 4.333924234                            | 128.8667468                                      | 748.29245                            | 16606.63843                             | -224.8297485                                |
| 4.254215409                            | 124.3212832                                      | 711.9992371                          | 15455.78146                             | -160.3010056                                |
| 3.897311709                            | 91.41010347                                      | 443.2772369                          | 8355.807017                             | -124.6830643                                |
| 4.653015476                            | 167.2843003                                      | 792.59729                            | 27984.03711                             | -356.3577332                                |
| 3.745129065                            | 83.73328743                                      | 463.244278                           | 7011.263423                             | -131.8969055                                |
| 4.309658607                            | 122.8079588                                      | 1025.464508                          | 15081.79474                             | -130.2471252                                |
| 4.39135034                             | 134.3297321                                      | 607.0286255                          | 18044.47692                             | -196.9374573                                |
| 4.32121012                             | 130.6182006                                      | 613.0102081                          | 17061.11432                             | -207.2071304                                |
| 4.369296916                            | 129.2756435                                      | 680.533905                           | 16712.19201                             | -203.9678558                                |
| 3.70402927                             | 84.99317798                                      | 573.0379486                          | 7223.840302                             | -120.8017029                                |
| 4.536798294                            | 146.3004572                                      | 809.4154053                          | 21403.82378                             | -229.47229                                  |
| 4.489775229                            | 142.3309918                                      | 882.9423523                          | 20258.11123                             | -166.4746704                                |
| 4.492993902                            | 140.8605745                                      | 814.994812                           | 19841.70145                             | -226.5312561                                |
| 4.118212                               | 106.702134                                       | 616.1053162                          | 11385.3454                              | -176.8050232                                |
| 3.637295167                            | 81.18863007                                      | 440.6401825                          | 6591.593653                             | -45.78141212                                |
| 4.220551783                            | 115.0642658                                      | 671.8453369                          | 13239.78526                             | -173.4354889                                |
| 4.34036702                             | 127.6120102                                      | 725.6801147                          | 16284.82515                             | -193.3121613                                |
| 4.487287566                            | 146.2913241                                      | 693.3190155                          | 21401.15151                             | -309.1481781                                |
| 4.389215386                            | 131.2749986                                      | 849.4014893                          | 17233.12526                             | -179.0937042                                |
| 4.192455814                            | 116.6888008                                      | 775.7824707                          | 13616.27624                             | -165.5489655                                |
| 4.258911869                            | 120.9124263                                      | 729.598877                           | 14619.81485                             | -155.4658783                                |
| 4.486755483                            | 140.6564075                                      | 707.4888916                          | 19784.22496                             | -227.3592712                                |
| 4.612020973                            | 155.9566395                                      | 810.5137939                          | 24322.47339                             | -315.6201569                                |
| 4.22849752                             | 127.565643                                       | 826.7184143                          | 16272.99328                             | -178.2239075                                |
| 4.034912008                            | 106.2094618                                      | 506.8716736                          | 11280.44977                             | -206.3466156                                |
| 4.046443853                            | 104.0246223                                      | 976.9974365                          | 10821.12204                             | -139.8063141                                |
| 4.478254492                            | 140.568197                                       | 741.6357422                          | 19759.41799                             | -262.1196564                                |
| 3.546077049                            | 75.88385984                                      | 696.0210571                          | 5758.360185                             | -79.89699936                                |
| 4.679442581                            | 158.623522                                       | 823.0299988                          | 25161.42174                             | -215.2481186                                |
| 4.500767657                            | 140.9262746                                      | 754.6036682                          | 19860.21488                             | -229.4812698                                |
| 3.951544626                            | 101.9497862                                      | 675.9236145                          | 10393.75892                             | -140.599144                                 |
| 4.466359784                            | 137.2583894                                      | 717.227478                           | 18839.86546                             | -181.8042755                                |
| 4.11574756                             | 106.8489444                                      | 756.2266235                          | 11416.69691                             | -146.629425                                 |
| 3.97272122                             | 99.92061944                                      | 500.4272461                          | 9984.13019                              | -192.7015076                                |
| 4.372570351                            | 133.7889864                                      | 679.0181885                          | 17899.492886                            | -167.8135834                                |
| 4.398913632                            | 136.3538227                                      | 648.9665527                          | 18592.36495                             | -195.3432068                                |
| 4.404006692                            | 138.2151757                                      | 691.2254028                          | 19103.43481                             | -225.7490051                                |
| 4.478314599                            | 137.4671789                                      | 804.5036926                          | 18897.22528                             | -132.8981873                                |
| 3.567130804                            | 80.75082261                                      | 647.3825836                          | 6520.695353                             | -110.3894348                                |
| 4.075527881                            | 103.7486738                                      | 721.4071655                          | 10763.78732                             | -145.9070557                                |
| 4.749302876                            | 174.7030567                                      | 791.980072                           | 30521.15801                             | -247.803479                                 |
| 4.493500595                            | 143.6971841                                      | 680.7905579                          | 20648.88071                             | -215.0069433                                |
| 4.235537398                            | 118.6395587                                      | 754.8825684                          | 14075.34488                             | -164.2467224                                |
| 4.368468137                            | 133.7525892                                      | 703.0108032                          | 17889.75513                             | -232.6683899                                |
| 4.307482226                            | 123.892763                                       | 625.4895477                          | 15349.41672                             | -253.0135162                                |
| 3.884914322                            | 95.41369834                                      | 778.3250122                          | 9103.773832                             | -122.0662277                                |
| 4.322260181                            | 123.1198454                                      | 740.5062866                          | 15158.49633                             | -172.587915                                 |
| 4.604415786                            | 149.1764198                                      | 908.593811                           | 22253.60422                             | -179.5430054                                |
| 4.495917578                            | 139.2846169                                      | 968.7718201                          | 19400.20451                             | -158.5747879                                |
| 4.511413241                            | 140.3346711                                      | 856.2685852                          | 19693.8199                              | -184.0627441                                |
| 4.191019648                            | 113.3481736                                      | 596.5986633                          | 12847.80847                             | -168.5279541                                |
| 4.509358522                            | 139.3560262                                      | 912.6933289                          | 19420.10203                             | -190.6739807                                |
| 4.380655913                            | 140.2769267                                      | 652.3126831                          | 19677.61615                             | -328.0942078                                |
| 4.359350073                            | 128.1019831                                      | 857.4571838                          | 16410.11808                             | -177.2797638                                |
| 4.075778027                            | 104.6712231                                      | 738.5874329                          | 10956.06494                             | -141.8417938                                |
| 4.3244474                              | 124.1435592                                      | 689.5721436                          | 15411.62328                             | -150.1485916                                |
| 4.326886672                            | 133.3300884                                      | 557.2441406                          | 17776.91248                             | -225.2884018                                |
| 4.358466866                            | 130.1255094                                      | 793.687439                           | 16932.64819                             | -190.5637512                                |
| 4.520337644                            | 150.299994                                       | 720.7706909                          | 22590.0882                              | -244.1907288                                |
| 4.20945137                             | 115.624491                                       | 633.0986633                          | 13369.02293                             | -202.7893539                                |
| 4.126478916                            | 113.7457024                                      | 876.7728577                          | 12938.08482                             | -147.172789                                 |
| 3.957982711                            | 96.48737337                                      | 482.6522675                          | 9309.813219                             | -128.2585205                                |
| 4.356765044                            | 125.5295658                                      | 764.9729919                          | 15757.67189                             | -169.9942261                                |
| 4.585357149                            | 166.7634603                                      | 801.048111                           | 27810.05169                             | -329.6659302                                |
| 4.369405151                            | 127.0127052                                      | 660.7677307                          | 16132.22727                             | -133.6117889                                |
| 3.990570788                            | 97.86679186                                      | 689.3829041                          | 9577.90895                              | -174.2483932                                |
| 4.615895443                            | 154.325245                                       | 811.8739319                          | 23816.28126                             | -261.812088                                 |
| 4.335202855                            | 127.575784                                       | 640.4159241                          | 16275.58065                             | -207.1795959                                |
| 4.302600946                            | 123.6521849                                      | 671.5584412                          | 15289.86284                             | -199.1520126                                |
| 4.034273223                            | 100.4219752                                      | 649.9716187                          | 10084.57311                             | -182.2216827                                |
| 4.230541255                            | 119.9769951                                      | 705.2663879                          | 14394.47935                             | -153.9075256                                |
| 4.265804052                            | 139.4114947                                      | 821.1523132                          | 19435.56487                             | -262.0371399                                |
| 4.330787821                            | 123.7863424                                      | 687.976532                           | 15323.05856                             | -203.8457703                                |
| 4.091113248                            | 113.6500489                                      | 690.9372864                          | 12916.33363                             | -149.9910049                                |
| 4.135410278                            | 108.3845926                                      | 681.9253845                          | 11747.21992                             | -156.8075409                                |
| 4.486007721                            | 140.1869152                                      | 729.045105                           | 19652.3712                              | -197.1659851                                |
| 4.457613832                            | 143.3921372                                      | 772.3740234                          | 20561.30502                             | -152.0482666                                |
| 4.089816193                            | 106.3087406                                      | 677.9395752                          | 11301.54833                             | -159.8217804                                |
| 4.108703418                            | 105.9213314                                      | 766.0842896                          | 11219.32844                             | -147.1070862                                |
| 4.288449754                            | 121.0069091                                      | 760.9627991                          | 14642.67206                             | -133.6572495                                |
| 3.951047112                            | 94.95379436                                      | 578.5023499                          | 9016.223064                             | -129.4995087                                |
| 4.742365042                            | 166.040122                                       | 921.7866821                          | 27569.32211                             | -245.8263794                                |
| 4.411359251                            | 133.4146965                                      | 694.1964417                          | 17799.48124                             | -173.4803818                                |
| 4.238987241                            | 125.2918961                                      | 625.4191132                          | 15698.05923                             | -287.4943115                                |
| 3.946492037                            | 105.1050084                                      | 520.377533                           | 11047.06279                             | -177.4812546                                |
| 4.40062376                             | 129.3227089                                      | 802.1093445                          | 16724.36304                             | -150.7802383                                |

| log.sigma.4.5.mm.3D_firstorder_Kurtosis | log.sigma.4.5.mm.3D_firstorder_Mean | log.sigma.4.5.mm.3D_glrIm_ShortRunLowGrayLevelEmphasis | log.sigma.4.5.mm.3D_glrIm_GrayLevelVariance |
|-----------------------------------------|-------------------------------------|--------------------------------------------------------|---------------------------------------------|
| 2.548918425                             | -68.67989651                        | 0.009265453                                            | 38.9647303                                  |
| 2.631735314                             | -50.86188673                        | 0.013108313                                            | 39.55846092                                 |
| 2.290045427                             | -15.30071384                        | 0.007963836                                            | 36.18905262                                 |
| 2.595405844                             | -51.05474627                        | 0.014954363                                            | 44.23784931                                 |
| 2.336834738                             | -6.146517221                        | 0.016983617                                            | 31.96147454                                 |
| 2.218097328                             | 14.28563937                         | 0.012625604                                            | 37.4421293                                  |
| 4.181061049                             | -9.347080057                        | 0.014295289                                            | 19.36283809                                 |
| 3.294530352                             | -31.55079972                        | 0.006489186                                            | 28.90488655                                 |
| 3.464621954                             | -20.68420985                        | 0.012215737                                            | 23.20307648                                 |
| 2.21334901                              | 28.5047451                          | 0.019307316                                            | 23.5866239                                  |
| 3.105021625                             | 17.70390698                         | 0.020194823                                            | 11.50015537                                 |
| 3.620208981                             | -1.64127649                         | 0.014173009                                            | 18.76920631                                 |
| 2.304714859                             | -48.42082341                        | 0.018714142                                            | 39.51955216                                 |
| 2.286293703                             | -104.0821013                        | 0.016449708                                            | 43.81837536                                 |
| 3.243792002                             | -67.32672828                        | 0.014245449                                            | 27.26281986                                 |
| 2.740215703                             | 1.532583693                         | 0.012252699                                            | 26.36625883                                 |
| 2.527160257                             | -2.785983877                        | 0.025314281                                            | 13.88388999                                 |
| 2.447332786                             | -105.994255                         | 0.014619523                                            | 44.78525486                                 |
| 3.261410827                             | -28.18281328                        | 0.021612403                                            | 11.97186644                                 |
| 3.587808184                             | 20.54828401                         | 0.002313632                                            | 25.18126651                                 |
| 2.208088695                             | -3.077668672                        | 0.013587477                                            | 28.95939875                                 |
| 2.763657607                             | -13.3594009                         | 0.017092809                                            | 27.2908785                                  |
| 2.744184039                             | -33.26995799                        | 0.020124122                                            | 27.07260168                                 |
| 4.133499025                             | -16.30256297                        | 0.012079174                                            | 12.67318923                                 |
| 2.596283993                             | -51.46842141                        | 0.007172675                                            | 35.60213721                                 |
| 2.852818662                             | 1.446026941                         | 0.004900842                                            | 33.07348011                                 |
| 2.682727933                             | -60.11271033                        | 0.009769911                                            | 32.2985436                                  |
| 2.742228526                             | -43.21610987                        | 0.012857529                                            | 18.75870419                                 |
| 2.656195583                             | 50.36796801                         | 0.022565527                                            | 10.9278223                                  |
| 2.873813659                             | -22.29311173                        | 0.011639535                                            | 21.31673378                                 |
| 2.698460125                             | -39.09551887                        | 0.010263953                                            | 26.59370787                                 |
| 2.251310577                             | -105.1431237                        | 0.008170516                                            | 34.50659616                                 |
| 3.190748033                             | -23.90440762                        | 0.010336162                                            | 28.29095094                                 |
| 2.733101536                             | -21.32456945                        | 0.008102868                                            | 22.30515814                                 |
| 2.924492536                             | -14.72900034                        | 0.009914813                                            | 24.18602175                                 |
| 2.508085184                             | -31.6042841                         | 0.010331683                                            | 32.25592091                                 |
| 2.715431369                             | -84.52420811                        | 0.006312864                                            | 39.01339074                                 |
| 3.17222369                              | -11.68007423                        | 0.008956944                                            | 28.7568665                                  |
| 2.565845777                             | -46.36849912                        | 0.024494337                                            | 17.94557201                                 |
| 4.357966015                             | -16.62916926                        | 0.002775159                                            | 18.67489507                                 |
| 2.340152554                             | -79.06789271                        | 0.014006066                                            | 31.5968137                                  |
| 5.212620641                             | 7.43761621                          | 0.009224145                                            | 10.23422014                                 |
| 2.52914116                              | -10.64626623                        | 0.007855132                                            | 40.20677106                                 |
| 2.546450513                             | -48.03867137                        | 0.012316867                                            | 31.8276925                                  |
| 4.189353239                             | -8.245630019                        | 0.011443095                                            | 18.03014971                                 |
| 2.427441501                             | -4.479360679                        | 0.009408896                                            | 30.49141892                                 |
| 3.128497494                             | -9.920541799                        | 0.005549274                                            | 18.96918211                                 |
| 2.772792816                             | -45.75711297                        | 0.025427516                                            | 16.2115023                                  |
| 2.965963152                             | 7.085445447                         | 0.031487055                                            | 29.1224251                                  |
| 2.59168234                              | -10.19538112                        | 0.010655146                                            | 30.02557296                                 |
| 2.52644424                              | -63.62867058                        | 0.017218263                                            | 30.68003488                                 |
| 2.837967245                             | 32.63180056                         | 0.006892241                                            | 30.76213648                                 |
| 5.60007807                              | -8.457818842                        | 0.015275066                                            | 12.31368662                                 |
| 3.310676213                             | -23.55530582                        | 0.005732819                                            | 17.80690738                                 |
| 2.352836519                             | -2.269266709                        | 0.011239741                                            | 49.09056242                                 |
| 2.271271364                             | -25.01824976                        | 0.018084401                                            | 33.00969228                                 |
| 3.055773484                             | -18.48924631                        | 0.009834221                                            | 23.27572585                                 |
| 2.002726546                             | -51.15748521                        | 0.006900393                                            | 28.84845017                                 |
| 2.442600713                             | -87.39544438                        | 0.012584315                                            | 25.00136244                                 |
| 4.231251145                             | -1.928822166                        | 0.006092683                                            | 16.7174815                                  |
| 2.931733455                             | -20.06063984                        | 0.010176194                                            | 24.82636179                                 |
| 2.671270962                             | 17.26980723                         | 0.005482372                                            | 36.40579757                                 |
| 2.786237415                             | 11.34869281                         | 0.003789378                                            | 32.02805426                                 |
| 2.963204703                             | -3.795072738                        | 0.007948521                                            | 31.9716325                                  |
| 2.400904971                             | -20.92133887                        | 0.018533393                                            | 20.9821641                                  |
| 2.881826823                             | -10.67885955                        | 0.005244811                                            | 31.47671559                                 |
| 2.639612706                             | -116.637245                         | 0.01010562                                             | 31.73487781                                 |
| 3.242251776                             | -30.46625702                        | 0.007265563                                            | 26.82570913                                 |
| 3.220805593                             | -10.7578543                         | 0.008241912                                            | 17.9820165                                  |
| 2.497883982                             | 18.71949104                         | 0.007225922                                            | 25.09518807                                 |
| 1.972217858                             | -52.96444808                        | 0.038827762                                            | 28.37160942                                 |
| 3.139449672                             | -12.97938921                        | 0.010306647                                            | 28.17314437                                 |
| 2.103040271                             | -51.65110296                        | 0.014830767                                            | 36.2606414                                  |
| 2.549654055                             | -60.68196122                        | 0.018749067                                            | 21.6421513                                  |
| 4.630988537                             | -14.5189272                         | 0.008146375                                            | 22.36014608                                 |
| 2.27646214                              | -1.226185179                        | 0.019648166                                            | 15.03757802                                 |
| 2.681031937                             | -6.314303417                        | 0.00902362                                             | 25.54649168                                 |
| 3.13588495                              | -82.26510639                        | 0.008400148                                            | 45.02837956                                 |
| 2.621700061                             | 38.16781257                         | 0.012727452                                            | 26.24828488                                 |
| 3.256339388                             | -48.36764932                        | 0.012887606                                            | 15.81094531                                 |
| 2.579704682                             | -71.6057177                         | 0.009480545                                            | 38.52049255                                 |
| 2.52418793                              | -26.78023332                        | 0.00934884                                             | 26.07816949                                 |
| 2.490733592                             | -42.39334004                        | 0.018388074                                            | 25.16292143                                 |
| 2.952710021                             | -57.44304284                        | 0.015128318                                            | 16.61018136                                 |
| 3.37575201                              | -7.806618126                        | 0.009800599                                            | 24.24166154                                 |
| 3.773903082                             | -37.07387341                        | 0.00584615                                             | 31.97637434                                 |
| 2.503472735                             | -45.44063085                        | 0.012153381                                            | 24.77631326                                 |
| 3.722279798                             | -3.998349876                        | 0.017179977                                            | 22.80672898                                 |
| 2.955501216                             | -23.14011432                        | 0.00892734                                             | 19.76190856                                 |
| 2.52879631                              | -1.014650631                        | 0.010267049                                            | 31.77984093                                 |
| 2.97302414                              | 15.58253863                         | 0.005287711                                            | 33.42848551                                 |
| 3.51571062                              | -24.00114807                        | 0.007233698                                            | 19.06542576                                 |
| 3.146309342                             | -15.81683467                        | 0.007326022                                            | 18.31981169                                 |
| 2.854480225                             | 14.23575628                         | 0.010645882                                            | 23.9386026                                  |
| 2.460816109                             | -8.166715925                        | 0.007509994                                            | 14.64829662                                 |
| 2.443308465                             | -23.69322479                        | 0.007238728                                            | 44.38147478                                 |
| 2.255760341                             | 2.346895034                         | 0.01095557                                             | 28.56694652                                 |
| 2.759193933                             | -112.5460289                        | 0.011634394                                            | 25.72815102                                 |
| 3.003060261                             | -27.20896602                        | 0.014975952                                            | 17.72071946                                 |
| 2.716995026                             | 21.03813077                         | 0.004670364                                            | 27.54113417                                 |

| log.sigma.4.5.mm.3D_glrIm_LowGrayLevelRunEmphasis | log.sigma.4.5.mm.3D_glrIm_GrayLevelNonUniformityNormalized | log.sigma.4.5.mm.3D_glrIm_RunVariance | log.sigma.4.5.mm.3D_glrIm_GrayLevelNonUniformity |
|---------------------------------------------------|------------------------------------------------------------|---------------------------------------|--------------------------------------------------|
| 0.00970335                                        | 0.045157567                                                | 0.089357346                           | 60.86952993                                      |
| 0.013553639                                       | 0.048199995                                                | 0.064855382                           | 15.84736563                                      |
| 0.008251997                                       | 0.046286412                                                | 0.102848383                           | 38.68114821                                      |
| 0.015451894                                       | 0.044173796                                                | 0.052020058                           | 13.56683871                                      |
| 0.017933142                                       | 0.050017292                                                | 0.086787694                           | 65.73719519                                      |
| 0.012999143                                       | 0.047582797                                                | 0.061904468                           | 10.93664708                                      |
| 0.015876576                                       | 0.074223944                                                | 0.501588494                           | 635.926704                                       |
| 0.006973023                                       | 0.054723573                                                | 0.170237243                           | 298.0185396                                      |
| 0.013499613                                       | 0.065155445                                                | 0.228000446                           | 242.1177593                                      |
| 0.020452187                                       | 0.056979078                                                | 0.108053124                           | 39.61598275                                      |
| 0.021933447                                       | 0.089336996                                                | 0.195748643                           | 122.1570978                                      |
| 0.015565809                                       | 0.071996757                                                | 0.261136875                           | 211.0704416                                      |
| 0.019397602                                       | 0.047159852                                                | 0.085096297                           | 35.76156513                                      |
| 0.017479109                                       | 0.043711125                                                | 0.055344677                           | 26.75133257                                      |
| 0.015365494                                       | 0.056041735                                                | 0.127381076                           | 80.52053607                                      |
| 0.013394764                                       | 0.057991493                                                | 0.309536                              | 286.7102093                                      |
| 0.027460578                                       | 0.073885917                                                | 0.145360366                           | 58.3839986                                       |
| 0.015367313                                       | 0.045529863                                                | 0.067585477                           | 17.57858131                                      |
| 0.023574522                                       | 0.0872969                                                  | 0.210844287                           | 83.24999624                                      |
| 0.002480226                                       | 0.059420481                                                | 0.165487311                           | 488.9604472                                      |
| 0.014475838                                       | 0.052097464                                                | 0.111356738                           | 99.76036297                                      |
| 0.018813562                                       | 0.058400866                                                | 0.082505777                           | 26.99405632                                      |
| 0.021532983                                       | 0.055162022                                                | 0.096390833                           | 28.54292561                                      |
| 0.013547629                                       | 0.093205863                                                | 0.344135672                           | 280.7114156                                      |
| 0.007574413                                       | 0.047909899                                                | 0.165376166                           | 52.82766253                                      |
| 0.00521281                                        | 0.050965885                                                | 0.141195867                           | 118.499868                                       |
| 0.010287842                                       | 0.050401903                                                | 0.103535639                           | 93.65388453                                      |
| 0.013898767                                       | 0.064483435                                                | 0.148586381                           | 130.3532101                                      |
| 0.024049466                                       | 0.09012266                                                 | 0.154424839                           | 11.61785478                                      |
| 0.012407694                                       | 0.06143453                                                 | 0.113173167                           | 90.8969098                                       |
| 0.011103222                                       | 0.054974107                                                | 0.152161884                           | 198.7036137                                      |
| 0.008435799                                       | 0.048938734                                                | 0.074273648                           | 36.29190076                                      |
| 0.011121365                                       | 0.055065429                                                | 0.142826908                           | 116.1440648                                      |
| 0.008732179                                       | 0.061393192                                                | 0.191057729                           | 132.2371343                                      |
| 0.010773507                                       | 0.059413098                                                | 0.161504284                           | 272.7675962                                      |
| 0.010844867                                       | 0.049230501                                                | 0.105642187                           | 88.11785413                                      |
| 0.006618734                                       | 0.046780752                                                | 0.073652857                           | 66.48961083                                      |
| 0.009822669                                       | 0.060473334                                                | 0.423951188                           | 293.5606508                                      |
| 0.026954249                                       | 0.06963807                                                 | 0.108018203                           | 35.80527411                                      |
| 0.00308439                                        | 0.072275302                                                | 0.287818428                           | 580.5330472                                      |
| 0.015036516                                       | 0.049217774                                                | 0.093028234                           | 61.10795534                                      |
| 0.010484951                                       | 0.104325305                                                | 0.374976689                           | 485.2944784                                      |
| 0.008249461                                       | 0.043661482                                                | 0.10085799                            | 98.66149592                                      |
| 0.013119093                                       | 0.04923284                                                 | 0.086095162                           | 65.19114607                                      |
| 0.01259248                                        | 0.07821964                                                 | 0.300334433                           | 103.7904166                                      |
| 0.0100621                                         | 0.049831071                                                | 0.110786843                           | 110.3801201                                      |
| 0.006049343                                       | 0.065891508                                                | 0.195495687                           | 311.5405255                                      |
| 0.027432548                                       | 0.073719268                                                | 0.10334177                            | 33.19011287                                      |
| 0.034496118                                       | 0.055637643                                                | 0.099579642                           | 20.14517622                                      |
| 0.010987384                                       | 0.053261722                                                | 0.061684482                           | 22.79662272                                      |
| 0.018798024                                       | 0.052403302                                                | 0.104943356                           | 62.40151666                                      |
| 0.00724576                                        | 0.051228275                                                | 0.102730272                           | 131.7390292                                      |
| 0.017535833                                       | 0.099398178                                                | 0.587455894                           | 614.0466254                                      |
| 0.006163826                                       | 0.06907218                                                 | 0.161978671                           | 101.0895332                                      |
| 0.011637584                                       | 0.040912547                                                | 0.061984113                           | 25.06063588                                      |
| 0.019229855                                       | 0.047850321                                                | 0.083724166                           | 52.62829429                                      |
| 0.010744445                                       | 0.06011874                                                 | 0.198508827                           | 213.9289578                                      |
| 0.007297391                                       | 0.051462997                                                | 0.105955134                           | 98.42867123                                      |
| 0.013362071                                       | 0.05620035                                                 | 0.091094727                           | 39.82687259                                      |
| 0.006891027                                       | 0.076422614                                                | 0.594791228                           | 664.0518458                                      |
| 0.010759293                                       | 0.056631121                                                | 0.103798967                           | 69.34238258                                      |
| 0.005715107                                       | 0.046191312                                                | 0.109430886                           | 105.5176879                                      |
| 0.004067132                                       | 0.050240242                                                | 0.154243825                           | 372.5076832                                      |
| 0.00840241                                        | 0.051141285                                                | 0.110779423                           | 98.40323534                                      |
| 0.019530214                                       | 0.059967243                                                | 0.098611728                           | 37.57463944                                      |
| 0.005540497                                       | 0.050129449                                                | 0.09466971                            | 159.0683057                                      |
| 0.010424594                                       | 0.055091357                                                | 0.060849207                           | 21.17706076                                      |
| 0.007831683                                       | 0.056875969                                                | 0.125206511                           | 263.350053                                       |
| 0.009033834                                       | 0.067976026                                                | 0.225728073                           | 446.6858528                                      |
| 0.007603923                                       | 0.055523356                                                | 0.114171576                           | 108.3189708                                      |
| 0.040946541                                       | 0.053007816                                                | 0.080683988                           | 24.4255239                                       |
| 0.011069763                                       | 0.057021475                                                | 0.177671615                           | 254.3534319                                      |
| 0.015667217                                       | 0.047106891                                                | 0.084770744                           | 58.8244321                                       |
| 0.019747508                                       | 0.059849278                                                | 0.085974739                           | 52.99531621                                      |
| 0.009014964                                       | 0.070327316                                                | 0.251643839                           | 247.0985508                                      |
| 0.021024173                                       | 0.070286742                                                | 0.118442745                           | 59.18183866                                      |
| 0.009639923                                       | 0.055138031                                                | 0.115502899                           | 111.5678453                                      |
| 0.008545891                                       | 0.050294301                                                | 0.053207327                           | 15.45336141                                      |
| 0.01324669                                        | 0.054353152                                                | 0.092062412                           | 66.23792228                                      |
| 0.013942497                                       | 0.072266829                                                | 0.172981649                           | 115.3621279                                      |
| 0.009930058                                       | 0.045610139                                                | 0.090244312                           | 59.83043134                                      |
| 0.009727014                                       | 0.055631706                                                | 0.086703218                           | 42.83617825                                      |
| 0.019994256                                       | 0.055620122                                                | 0.175137309                           | 115.0072635                                      |
| 0.016365402                                       | 0.069672715                                                | 0.1455399                             | 118.4541424                                      |
| 0.010645348                                       | 0.062556277                                                | 0.218068788                           | 149.7484769                                      |
| 0.00599718                                        | 0.068218723                                                | 0.084115203                           | 33.78174485                                      |
| 0.012922632                                       | 0.055432682                                                | 0.10616707                            | 66.6963765                                       |
| 0.019181766                                       | 0.068340358                                                | 0.364726272                           | 219.2210062                                      |
| 0.009524345                                       | 0.065809359                                                | 0.148816134                           | 100.8861656                                      |
| 0.010837537                                       | 0.050023171                                                | 0.099137684                           | 63.35716004                                      |
| 0.005524491                                       | 0.051649287                                                | 0.109819864                           | 38.13155217                                      |
| 0.007880285                                       | 0.069561864                                                | 0.211901686                           | 154.3469913                                      |
| 0.007912823                                       | 0.066028128                                                | 0.146661287                           | 267.0750255                                      |
| 0.011397091                                       | 0.058207472                                                | 0.133478258                           | 182.5494355                                      |
| 0.008177332                                       | 0.071636772                                                | 0.156578941                           | 211.4170827                                      |
| 0.007608974                                       | 0.041424141                                                | 0.081865483                           | 92.5127363                                       |
| 0.011561178                                       | 0.051096602                                                | 0.101696999                           | 115.821904                                       |
| 0.012072487                                       | 0.061417007                                                | 0.08448184                            | 17.95878675                                      |
| 0.015547952                                       | 0.076785751                                                | 0.086032887                           | 19.19941405                                      |
| 0.004977737                                       | 0.05345865                                                 | 0.14949792                            | 426.2549708                                      |

|                                           |                                                         |                                                  |                                            |
|-------------------------------------------|---------------------------------------------------------|--------------------------------------------------|--------------------------------------------|
| log.sigma.4.5.mm.3D_glrIm_LongRunEmphasis | log.sigma.4.5.mm.3D_glrIm_ShortRunHighGrayLevelEmphasis | log.sigma.4.5.mm.3D_glrIm_RunLengthNonUniformity | log.sigma.4.5.mm.3D_glrIm_ShortRunEmphasis |
| 1.239228128                               | 278.1148688                                             | 1190.001147                                      | 0.951810278                                |
| 1.182274069                               | 329.9014708                                             | 297.8885678                                      | 0.961221093                                |
| 1.249955313                               | 307.7453757                                             | 751.0809302                                      | 0.956934418                                |
| 1.153201773                               | 339.5592524                                             | 280.8228232                                      | 0.965117973                                |
| 1.240924907                               | 197.2014657                                             | 1151.751073                                      | 0.949283017                                |
| 1.173190513                               | 285.4354287                                             | 208.9923063                                      | 0.96298888                                 |
| 2.034220772                               | 127.9139563                                             | 6254.639025                                      | 0.876908094                                |
| 1.415731555                               | 247.526391                                              | 4529.848153                                      | 0.928371775                                |
| 1.553708655                               | 151.6550263                                             | 2961.966374                                      | 0.910668142                                |
| 1.291720574                               | 153.5538706                                             | 599.6186658                                      | 0.942157114                                |
| 1.506426197                               | 90.22332751                                             | 1092.189649                                      | 0.910820259                                |
| 1.624491842                               | 139.4033214                                             | 2283.958498                                      | 0.902111019                                |
| 1.232187307                               | 265.5949129                                             | 670.7543451                                      | 0.952370254                                |
| 1.163362042                               | 301.6773583                                             | 554.5859791                                      | 0.962396169                                |
| 1.333057777                               | 163.300273                                              | 1221.407603                                      | 0.936830169                                |
| 1.685184331                               | 170.5765335                                             | 3908.09093                                       | 0.905968759                                |
| 1.396082935                               | 96.01283169                                             | 645.6250481                                      | 0.922223457                                |
| 1.191371709                               | 298.2788947                                             | 346.295634                                       | 0.958192383                                |
| 1.540180548                               | 93.34646741                                             | 753.7242711                                      | 0.907308151                                |
| 1.414668085                               | 487.4213062                                             | 6812.417081                                      | 0.92659331                                 |
| 1.290957669                               | 197.3801116                                             | 1658.276863                                      | 0.944216                                   |
| 1.237260047                               | 239.2251907                                             | 405.2284092                                      | 0.948701038                                |
| 1.263168508                               | 191.5019661                                             | 451.524035                                       | 0.94689975                                 |
| 1.787885248                               | 118.6111574                                             | 2253.211034                                      | 0.886433457                                |
| 1.417003462                               | 317.4301414                                             | 919.742068                                       | 0.927891361                                |
| 1.35470321                                | 326.3169611                                             | 1973.073885                                      | 0.935990301                                |
| 1.270447407                               | 253.3411172                                             | 1625.590213                                      | 0.947815478                                |
| 1.396186461                               | 149.2614886                                             | 1663.775542                                      | 0.924387023                                |
| 1.454948511                               | 94.39293551                                             | 102.7185439                                      | 0.908542625                                |
| 1.300435435                               | 172.4207742                                             | 1272.111001                                      | 0.941387304                                |
| 1.385803102                               | 185.2784543                                             | 3026.898284                                      | 0.93076093                                 |
| 1.205491667                               | 319.3057298                                             | 663.1464104                                      | 0.9567104                                  |
| 1.372732991                               | 202.33287                                               | 1764.138117                                      | 0.930450244                                |
| 1.455612702                               | 195.2767898                                             | 1779.800882                                      | 0.925204362                                |
| 1.415298077                               | 182.5567239                                             | 3778.113942                                      | 0.924426281                                |
| 1.281779456                               | 280.1459018                                             | 1551.870587                                      | 0.944507588                                |
| 1.208749805                               | 388.5508512                                             | 1267.448786                                      | 0.955222455                                |
| 1.874471586                               | 204.3399482                                             | 3699.836461                                      | 0.893597063                                |
| 1.299655985                               | 145.5656768                                             | 439.2060819                                      | 0.938803262                                |
| 1.682621057                               | 373.7768614                                             | 6143.147995                                      | 0.894921846                                |
| 1.25975202                                | 203.019785                                              | 1078.029654                                      | 0.945561713                                |
| 1.880390443                               | 133.9620197                                             | 3347.293861                                      | 0.871325725                                |
| 1.253591423                               | 320.4972699                                             | 2015.527092                                      | 0.953892391                                |
| 1.23808799                                | 208.8812353                                             | 1164.95343                                       | 0.950398642                                |
| 1.694521395                               | 152.3065509                                             | 1021.351788                                      | 0.897201595                                |
| 1.289354032                               | 227.9478122                                             | 1921.898898                                      | 0.944599269                                |
| 1.481331866                               | 231.3704236                                             | 3830.92919                                       | 0.918029254                                |
| 1.298901608                               | 123.5344299                                             | 382.5262157                                      | 0.936513944                                |
| 1.268360331                               | 162.6288574                                             | 314.7324595                                      | 0.945911014                                |
| 1.178127367                               | 278.1449522                                             | 385.7365187                                      | 0.960173635                                |
| 1.275960357                               | 171.3239536                                             | 1036.741235                                      | 0.946280975                                |
| 1.277257644                               | 299.3056972                                             | 2225.171527                                      | 0.944214645                                |
| 2.287292966                               | 99.42585256                                             | 4156.872003                                      | 0.844662032                                |
| 1.428130657                               | 242.2302682                                             | 1193.6046                                        | 0.919959                                   |
| 1.165995456                               | 375.0385104                                             | 561.5440154                                      | 0.966277279                                |
| 1.228958259                               | 182.412279                                              | 973.0658185                                      | 0.952677676                                |
| 1.481620622                               | 176.0712193                                             | 2908.495793                                      | 0.920370967                                |
| 1.277003688                               | 257.3299013                                             | 1667.301986                                      | 0.94671277                                 |
| 1.252619523                               | 213.1338645                                             | 618.3281634                                      | 0.947356441                                |
| 2.190235179                               | 198.2295431                                             | 6223.265574                                      | 0.868960107                                |
| 1.284178168                               | 204.1734744                                             | 1054.490975                                      | 0.942265057                                |
| 1.27671263                                | 349.6566159                                             | 1994.142749                                      | 0.947549222                                |
| 1.391648386                               | 370.2139343                                             | 6175.894197                                      | 0.928871104                                |
| 1.299816633                               | 282.5128498                                             | 1647.755467                                      | 0.940082882                                |
| 1.268687039                               | 151.6786862                                             | 544.5733419                                      | 0.945521751                                |
| 1.258809413                               | 341.0410847                                             | 2764.253687                                      | 0.94687407                                 |
| 1.176883991                               | 301.8735233                                             | 346.1091089                                      | 0.959507392                                |
| 1.334965419                               | 249.5065607                                             | 3912.766903                                      | 0.934686848                                |
| 1.539993039                               | 174.8901333                                             | 5266.715467                                      | 0.912999506                                |
| 1.303118901                               | 241.2953736                                             | 1676.184558                                      | 0.941092087                                |
| 1.225132371                               | 154.0651901                                             | 408.8187908                                      | 0.953073853                                |
| 1.429718246                               | 211.1722388                                             | 3703.538099                                      | 0.927522544                                |
| 1.229008879                               | 211.018231                                              | 1106.912573                                      | 0.953459684                                |
| 1.240277676                               | 139.7455193                                             | 778.0465449                                      | 0.949674002                                |
| 1.614279818                               | 200.6213738                                             | 2731.590671                                      | 0.901295335                                |
| 1.31593343                                | 117.6197617                                             | 722.6894532                                      | 0.939205652                                |
| 1.309929302                               | 242.1230887                                             | 1727.739041                                      | 0.938830392                                |
| 1.160113848                               | 474.1536415                                             | 278.6372105                                      | 0.962392505                                |
| 1.259438384                               | 211.7802523                                             | 1057.513894                                      | 0.945067373                                |
| 1.450145413                               | 140.312326                                              | 1293.605356                                      | 0.918051977                                |
| 1.241447628                               | 273.9670567                                             | 1157.1346                                        | 0.951451476                                |
| 1.241461701                               | 248.5724033                                             | 676.9975557                                      | 0.949743161                                |
| 1.407529501                               | 157.4818174                                             | 1767.722095                                      | 0.936712659                                |
| 1.389657148                               | 135.7740764                                             | 1402.614654                                      | 0.925285085                                |
| 1.513807788                               | 186.771957                                              | 1938.990724                                      | 0.917577464                                |
| 1.239435025                               | 445.1666509                                             | 433.338213                                       | 0.948580421                                |
| 1.291779231                               | 202.1257694                                             | 1032.734543                                      | 0.940705499                                |
| 1.810182126                               | 140.9828013                                             | 2407.252772                                      | 0.88825368                                 |
| 1.385318008                               | 193.3749439                                             | 1276.435225                                      | 0.928842883                                |
| 1.266293539                               | 230.4808307                                             | 1103.300329                                      | 0.946705112                                |
| 1.299741793                               | 413.7533425                                             | 632.827309                                       | 0.940026679                                |
| 1.524511438                               | 214.6912822                                             | 1775.737371                                      | 0.912205087                                |
| 1.38920868                                | 198.3888357                                             | 3344.083521                                      | 0.926076077                                |
| 1.345029306                               | 185.7991303                                             | 2659.9465                                        | 0.935885334                                |
| 1.416585593                               | 176.5382566                                             | 2407.347302                                      | 0.920753242                                |
| 1.223442633                               | 338.7233669                                             | 1983.300588                                      | 0.954070781                                |
| 1.275908641                               | 203.2763075                                             | 1966.665844                                      | 0.944617272                                |
| 1.234758976                               | 268.4477274                                             | 258.1109132                                      | 0.951155649                                |
| 1.239957603                               | 186.1469845                                             | 219.7503575                                      | 0.949685373                                |
| 1.378323705                               | 306.2672919                                             | 6682.084539                                      | 0.931361739                                |

| log.sigma.4.5.mm.3D_glrIm_LongRunHighGrayLevelEmphasis | log.sigma.4.5.mm.3D_glrIm_RunPercentage | log.sigma.4.5.mm.3D_glrIm_LongRunLowGrayLevelEmphasis | log.sigma.4.5.mm.3D_glrIm_RunEntropy |
|--------------------------------------------------------|-----------------------------------------|-------------------------------------------------------|--------------------------------------|
| 348.5327911                                            | 0.933411464                             | 0.011739293                                           | 4.974534728                          |
| 413.0012253                                            | 0.94746176                              | 0.01539933                                            | 4.807311518                          |
| 400.2160297                                            | 0.936961021                             | 0.009867952                                           | 4.860357127                          |
| 397.0501317                                            | 0.953893932                             | 0.017499998                                           | 4.892814846                          |
| 257.1960946                                            | 0.93141798                              | 0.022109761                                           | 4.823497362                          |
| 347.5154914                                            | 0.949777495                             | 0.014603687                                           | 4.735263275                          |
| 276.7927927                                            | 0.811535177                             | 0.027302939                                           | 4.838098284                          |
| 358.2011469                                            | 0.897355611                             | 0.009630378                                           | 4.92004813                           |
| 232.7009774                                            | 0.871439916                             | 0.020823335                                           | 4.786005117                          |
| 199.1586666                                            | 0.920835456                             | 0.0262398                                             | 4.625581521                          |
| 140.1791138                                            | 0.878089777                             | 0.031558064                                           | 4.310972739                          |
| 231.0007418                                            | 0.859723194                             | 0.023804729                                           | 4.71870646                           |
| 351.7440375                                            | 0.934838281                             | 0.022440115                                           | 4.894161371                          |
| 358.3101354                                            | 0.950310559                             | 0.021833837                                           | 4.906262537                          |
| 210.8591172                                            | 0.912234432                             | 0.021185873                                           | 4.774698602                          |
| 296.6892749                                            | 0.857394601                             | 0.020975135                                           | 4.929126354                          |
| 137.6053112                                            | 0.894851468                             | 0.037771716                                           | 4.408703975                          |
| 367.0065923                                            | 0.943953357                             | 0.018422307                                           | 4.9183369                            |
| 147.3194951                                            | 0.871185487                             | 0.034278104                                           | 4.367897147                          |
| 733.7834369                                            | 0.895953225                             | 0.003410116                                           | 4.853712424                          |
| 267.8432214                                            | 0.921596209                             | 0.019007137                                           | 4.786577572                          |
| 309.5758666                                            | 0.93207196                              | 0.025816182                                           | 4.643195608                          |
| 250.6273667                                            | 0.927212572                             | 0.027663498                                           | 4.710160908                          |
| 223.925068                                             | 0.835824726                             | 0.023053309                                           | 4.497033944                          |
| 476.083575                                             | 0.897456778                             | 0.009645901                                           | 5.018476127                          |
| 447.5919896                                            | 0.909473938                             | 0.006929203                                           | 4.952178617                          |
| 320.9749403                                            | 0.927107324                             | 0.012970687                                           | 4.870880794                          |
| 213.2215801                                            | 0.89706033                              | 0.019085326                                           | 4.635049877                          |
| 141.2722502                                            | 0.882507903                             | 0.031467989                                           | 4.130991292                          |
| 230.7687734                                            | 0.91892021                              | 0.016237793                                           | 4.633642255                          |
| 259.6878768                                            | 0.901644377                             | 0.015589848                                           | 4.834949446                          |
| 402.1430379                                            | 0.941136275                             | 0.009644067                                           | 4.786893219                          |
| 280.4692567                                            | 0.903211991                             | 0.01518495                                            | 4.876963554                          |
| 299.7004473                                            | 0.891575092                             | 0.012266713                                           | 4.714677562                          |
| 257.9290616                                            | 0.894303826                             | 0.015294854                                           | 4.800319019                          |
| 377.6013144                                            | 0.923156266                             | 0.013260394                                           | 4.880653363                          |
| 486.7187138                                            | 0.940018315                             | 0.007946293                                           | 4.925200741                          |
| 409.4089623                                            | 0.832754087                             | 0.015900446                                           | 5.021786086                          |
| 199.7124693                                            | 0.917857143                             | 0.03805297                                            | 4.424213855                          |
| 681.6915543                                            | 0.849785443                             | 0.005027384                                           | 4.783429857                          |
| 257.042625                                             | 0.926578645                             | 0.019824925                                           | 4.850455395                          |
| 270.4150181                                            | 0.818921558                             | 0.01845313                                            | 4.419817326                          |
| 409.0202694                                            | 0.934720366                             | 0.010383345                                           | 5.009203094                          |
| 262.2405237                                            | 0.93255688                              | 0.016819086                                           | 4.842528823                          |
| 272.2310326                                            | 0.851344671                             | 0.019371329                                           | 4.662733278                          |
| 294.1555304                                            | 0.922532278                             | 0.013282934                                           | 4.86445207                           |
| 356.9656711                                            | 0.883486911                             | 0.008884185                                           | 4.69540148                           |
| 168.4546773                                            | 0.916653611                             | 0.036202446                                           | 4.379560741                          |
| 207.6511274                                            | 0.926027936                             | 0.047185034                                           | 4.709844091                          |
| 341.0274419                                            | 0.946902655                             | 0.012369506                                           | 4.662237285                          |
| 210.5331137                                            | 0.925109079                             | 0.026087277                                           | 4.779135166                          |
| 393.0765896                                            | 0.923353128                             | 0.008936229                                           | 4.884601225                          |
| 253.7150122                                            | 0.772577347                             | 0.033497804                                           | 4.646292397                          |
| 364.4951873                                            | 0.891220838                             | 0.008437501                                           | 4.611516599                          |
| 454.2241174                                            | 0.952506281                             | 0.013431063                                           | 4.979156303                          |
| 229.6697611                                            | 0.935243328                             | 0.024726382                                           | 4.823601332                          |
| 266.0533                                               | 0.886081042                             | 0.015820799                                           | 4.795845866                          |
| 336.2938346                                            | 0.925347028                             | 0.009344285                                           | 4.754113296                          |
| 272.5946843                                            | 0.928722653                             | 0.016808836                                           | 4.660619128                          |
| 481.9738583                                            | 0.796213518                             | 0.013278021                                           | 4.838106224                          |
| 266.7891781                                            | 0.921340511                             | 0.013493398                                           | 4.729609085                          |
| 463.5928299                                            | 0.926540802                             | 0.006895295                                           | 4.992097691                          |
| 530.191129                                             | 0.900394238                             | 0.005564727                                           | 5.012911771                          |
| 385.9904527                                            | 0.917975631                             | 0.010561448                                           | 4.934976724                          |
| 194.3952236                                            | 0.925576639                             | 0.024660067                                           | 4.554609491                          |
| 446.8144878                                            | 0.927506577                             | 0.006906795                                           | 4.899827767                          |
| 369.9857096                                            | 0.946760136                             | 0.011758374                                           | 4.634781997                          |
| 336.1006084                                            | 0.910475758                             | 0.010575918                                           | 4.829369172                          |
| 284.9299506                                            | 0.875199787                             | 0.013735278                                           | 4.682655322                          |
| 336.3864963                                            | 0.918368825                             | 0.009465206                                           | 4.745180756                          |
| 190.2909995                                            | 0.936522827                             | 0.05021092                                            | 4.632833993                          |
| 310.8284311                                            | 0.89512455                              | 0.015153118                                           | 4.893945806                          |
| 260.8985614                                            | 0.935407663                             | 0.019576476                                           | 4.852808655                          |
| 175.2484105                                            | 0.932064777                             | 0.024431495                                           | 4.561729601                          |
| 334.4182657                                            | 0.85963987                              | 0.01383857                                            | 4.819445949                          |
| 160.3872667                                            | 0.917295123                             | 0.027893023                                           | 4.359028642                          |
| 339.0590427                                            | 0.916042762                             | 0.012433593                                           | 4.788747404                          |
| 577.6062709                                            | 0.951178852                             | 0.009145296                                           | 4.81263947                           |
| 279.1348312                                            | 0.926703715                             | 0.015599614                                           | 4.754074291                          |
| 211.4266999                                            | 0.886709402                             | 0.019376019                                           | 4.549442743                          |
| 344.3847252                                            | 0.932924828                             | 0.012015626                                           | 4.963842289                          |
| 331.536043                                             | 0.932110263                             | 0.011406366                                           | 4.675324348                          |
| 223.3914723                                            | 0.905649565                             | 0.029246023                                           | 4.750468514                          |
| 190.3475791                                            | 0.898004795                             | 0.022712679                                           | 4.544708435                          |
| 287.5529246                                            | 0.881201303                             | 0.015480704                                           | 4.81844372                           |
| 593.9683794                                            | 0.931768796                             | 0.006662362                                           | 4.619455837                          |
| 269.7454737                                            | 0.91984239                              | 0.016603291                                           | 4.73603451                           |
| 253.4218285                                            | 0.834663512                             | 0.031315985                                           | 4.884920124                          |
| 274.4238257                                            | 0.900963234                             | 0.012621418                                           | 4.63821065                           |
| 301.3971977                                            | 0.92645321                              | 0.013606426                                           | 4.861319958                          |
| 567.355341                                             | 0.918101799                             | 0.006628447                                           | 4.854158846                          |
| 342.2797268                                            | 0.875926601                             | 0.011491094                                           | 4.697150848                          |
| 286.7059216                                            | 0.89863791                              | 0.01093825                                            | 4.626194706                          |
| 254.8943016                                            | 0.909951337                             | 0.015287347                                           | 4.751597419                          |
| 260.8598366                                            | 0.892465865                             | 0.011621291                                           | 4.485310172                          |
| 427.6381717                                            | 0.936725607                             | 0.009268946                                           | 5.081522403                          |
| 269.4229914                                            | 0.9244259                               | 0.014538135                                           | 4.808107516                          |
| 348.7472562                                            | 0.934136151                             | 0.013972557                                           | 5.540531297                          |
| 247.0459581                                            | 0.932548794                             | 0.017983895                                           | 4.258390035                          |
| 449.5673443                                            | 0.90344515                              | 0.006625291                                           | 4.901656528                          |

| log.sigma.4.5.mm.3D_girlm_HighGrayLevelRunEmphasis | log.sigma.4.5.mm.3D_girlm_RunLengthNonUniformityNormalized | log.sigma.4.5.mm.3D_glszm_GrayLevelVariance |
|----------------------------------------------------|------------------------------------------------------------|---------------------------------------------|
| 290.0078909                                        | 0.882079999                                                | 43.27312251                                 |
| 343.9480479                                        | 0.904544932                                                | 38.58107326                                 |
| 321.4795469                                        | 0.896075678                                                | 39.10844082                                 |
| 350.0974217                                        | 0.913204025                                                | 46.59161192                                 |
| 207.6018525                                        | 0.875770784                                                | 32.10201628                                 |
| 296.0407259                                        | 0.908177351                                                | 35.76694411                                 |
| 143.8247523                                        | 0.729024459                                                | 30.40843881                                 |
| 263.8127654                                        | 0.830811817                                                | 36.67956302                                 |
| 162.9438521                                        | 0.794985083                                                | 28.44447471                                 |
| 161.3757538                                        | 0.860842318                                                | 27.04816867                                 |
| 97.87802332                                        | 0.795532595                                                | 16.93530333                                 |
| 151.9122416                                        | 0.777315118                                                | 26.25967794                                 |
| 280.0061197                                        | 0.883548879                                                | 42.82357939                                 |
| 312.1167025                                        | 0.905818427                                                | 45.00513849                                 |
| 170.9679826                                        | 0.848835202                                                | 29.43794929                                 |
| 186.0596705                                        | 0.787290363                                                | 31.11233116                                 |
| 102.9000006                                        | 0.816487847                                                | 17.22839506                                 |
| 309.8450668                                        | 0.896294152                                                | 46.24277457                                 |
| 101.2751018                                        | 0.787813096                                                | 18.14739499                                 |
| 524.6625774                                        | 0.826890234                                                | 38.18591324                                 |
| 208.6461185                                        | 0.865127977                                                | 27.61833056                                 |
| 251.2788967                                        | 0.87505955                                                 | 30.57483982                                 |
| 201.2327868                                        | 0.871341034                                                | 31.86299979                                 |
| 131.9029308                                        | 0.746753315                                                | 18.91620239                                 |
| 340.490214                                         | 0.8314977                                                  | 43.1222613                                  |
| 345.5276168                                        | 0.847384298                                                | 36.6528838                                  |
| 264.142793                                         | 0.873601242                                                | 36.55401662                                 |
| 159.5306399                                        | 0.821727916                                                | 23.27998686                                 |
| 102.354571                                         | 0.792118905                                                | 18.95836735                                 |
| 181.9574888                                        | 0.85877776                                                 | 24.7195004                                  |
| 196.6472591                                        | 0.836150928                                                | 28.90759637                                 |
| 333.4876753                                        | 0.893265219                                                | 36.39840977                                 |
| 214.8412984                                        | 0.835135505                                                | 32.8368288                                  |
| 209.7404013                                        | 0.824749773                                                | 24.5991602                                  |
| 194.3409016                                        | 0.82201078                                                 | 30.13771726                                 |
| 296.2135678                                        | 0.865873679                                                | 34.12649796                                 |
| 405.5419895                                        | 0.890235677                                                | 41.63045196                                 |
| 226.2963007                                        | 0.761593516                                                | 33.68342866                                 |
| 154.5175808                                        | 0.852915426                                                | 18.18228459                                 |
| 414.521185                                         | 0.762898834                                                | 30.24686433                                 |
| 212.4740493                                        | 0.867487289                                                | 30.67105881                                 |
| 151.4205051                                        | 0.71784009                                                 | 20.69690397                                 |
| 334.1753169                                        | 0.888869056                                                | 38.29541197                                 |
| 218.0530202                                        | 0.878810294                                                | 29.96606388                                 |
| 167.6524492                                        | 0.767986825                                                | 26.22604835                                 |
| 238.7806484                                        | 0.866360863                                                | 31.79674557                                 |
| 249.5179551                                        | 0.809005641                                                | 24.98403433                                 |
| 131.2580183                                        | 0.847984405                                                | 20.7061971                                  |
| 170.1314408                                        | 0.868373782                                                | 35.051136                                   |
| 289.2147295                                        | 0.900751733                                                | 33.84567081                                 |
| 177.6855366                                        | 0.869769944                                                | 28.13555455                                 |
| 315.0923533                                        | 0.864665538                                                | 35.76080257                                 |
| 115.8382775                                        | 0.670995248                                                | 22.4346575                                  |
| 261.6569849                                        | 0.81322803                                                 | 25.31520326                                 |
| 387.844897                                         | 0.916170026                                                | 52.72477585                                 |
| 190.4927466                                        | 0.883924215                                                | 32.10495351                                 |
| 188.8375836                                        | 0.814962426                                                | 26.922784                                   |
| 270.0291395                                        | 0.870722742                                                | 29.36886602                                 |
| 223.3310531                                        | 0.871739287                                                | 26.78433854                                 |
| 225.7522548                                        | 0.714725468                                                | 27.54040886                                 |
| 214.7218211                                        | 0.860323445                                                | 30.31948573                                 |
| 368.0137804                                        | 0.872321184                                                | 43.55863656                                 |
| 395.2602525                                        | 0.831705164                                                | 39.40653649                                 |
| 299.7276162                                        | 0.855540434                                                | 37.92144368                                 |
| 158.9280663                                        | 0.867952911                                                | 25.50827689                                 |
| 359.0269475                                        | 0.870511473                                                | 37.99933076                                 |
| 314.3079517                                        | 0.899435313                                                | 34.14005112                                 |
| 263.9163492                                        | 0.843951827                                                | 32.73724652                                 |
| 190.2662806                                        | 0.799269297                                                | 23.56996683                                 |
| 256.8279621                                        | 0.858179976                                                | 30.6500806                                  |
| 160.2189046                                        | 0.885550239                                                | 28.48277045                                 |
| 225.4602802                                        | 0.829377556                                                | 33.73232649                                 |
| 219.3596021                                        | 0.885832434                                                | 34.80785124                                 |
| 145.9497298                                        | 0.877398978                                                | 25.06190794                                 |
| 219.0023061                                        | 0.775674717                                                | 33.53861965                                 |
| 124.8558293                                        | 0.855242398                                                | 15.7645519                                  |
| 257.7857321                                        | 0.852855617                                                | 32.25199871                                 |
| 493.6619254                                        | 0.906085787                                                | 49.10734651                                 |
| 223.4892248                                        | 0.866617961                                                | 33.59503589                                 |
| 151.1769284                                        | 0.808885154                                                | 22.84902007                                 |
| 285.8218324                                        | 0.881303681                                                | 42.67726665                                 |
| 262.6180279                                        | 0.87777005                                                 | 27.10276171                                 |
| 166.2956016                                        | 0.851621935                                                | 25.23835281                                 |
| 144.5799339                                        | 0.823748934                                                | 20.64914115                                 |
| 200.8280717                                        | 0.808469003                                                | 31.31398748                                 |
| 470.9080183                                        | 0.87452323                                                 | 45.09276844                                 |
| 213.4339849                                        | 0.857046365                                                | 29.69140406                                 |
| 154.6790241                                        | 0.749979214                                                | 29.60267342                                 |
| 206.1567258                                        | 0.831556434                                                | 27.5210999                                  |
| 242.2676285                                        | 0.87040174                                                 | 35.32381151                                 |
| 439.2005671                                        | 0.855931448                                                | 41.23426989                                 |
| 232.8976044                                        | 0.79726034                                                 | 24.82931448                                 |
| 212.599827                                         | 0.825431133                                                | 24.07155547                                 |
| 196.8957877                                        | 0.847015351                                                | 28.95540455                                 |
| 190.0315754                                        | 0.814138573                                                | 18.06354426                                 |
| 353.7811357                                        | 0.887312577                                                | 49.18275181                                 |
| 214.4487865                                        | 0.866141468                                                | 31.31611266                                 |
| 281.9800224                                        | 0.881091563                                                | 30.26298066                                 |
| 196.2225868                                        | 0.877589524                                                | 20.10054348                                 |
| 328.4605561                                        | 0.836997403                                                | 33.4901346                                  |

| log.sigma.4.5.mm.3D_glszm_SmallAreaHighGrayLevelEmphasis | log.sigma.4.5.mm.3D_glszm_GrayLevelNonUniformityNormalized | log.sigma.4.5.mm.3D_glszm_SizeZoneNonUniformityNormalized |
|----------------------------------------------------------|------------------------------------------------------------|-----------------------------------------------------------|
| 215.9577218                                              | 0.042647896                                                | 0.345284923                                               |
| 199.65513                                                | 0.047413294                                                | 0.34524131                                                |
| 206.2665176                                              | 0.045208163                                                | 0.348391837                                               |
| 245.5835774                                              | 0.045265182                                                | 0.343053998                                               |
| 112.8577944                                              | 0.049162156                                                | 0.252050472                                               |
| 196.2339324                                              | 0.050832342                                                | 0.36519025                                                |
| 107.7587817                                              | 0.050659949                                                | 0.271275017                                               |
| 200.8619208                                              | 0.046110678                                                | 0.317531687                                               |
| 144.4829562                                              | 0.052292806                                                | 0.282444012                                               |
| 107.5387492                                              | 0.053631887                                                | 0.275969529                                               |
| 61.12370955                                              | 0.067877478                                                | 0.215700081                                               |
| 112.8859224                                              | 0.054857438                                                | 0.268414187                                               |
| 149.1969022                                              | 0.042882506                                                | 0.30821597                                                |
| 213.9434065                                              | 0.042296916                                                | 0.370209158                                               |
| 148.9021609                                              | 0.054031467                                                | 0.341877941                                               |
| 128.2754523                                              | 0.049320563                                                | 0.299714463                                               |
| 72.84697515                                              | 0.069259259                                                | 0.234938272                                               |
| 212.2408987                                              | 0.044137793                                                | 0.33074944                                                |
| 83.76101134                                              | 0.068601519                                                | 0.272877284                                               |
| 299.5903661                                              | 0.045244817                                                | 0.285221311                                               |
| 120.9616213                                              | 0.051972222                                                | 0.281655556                                               |
| 120.2922403                                              | 0.052064003                                                | 0.227057876                                               |
| 113.9802938                                              | 0.050673355                                                | 0.243512795                                               |
| 100.5758846                                              | 0.065135073                                                | 0.250497144                                               |
| 234.1294111                                              | 0.042557102                                                | 0.322921772                                               |
| 237.1510591                                              | 0.046649703                                                | 0.300759474                                               |
| 214.5634949                                              | 0.046811335                                                | 0.349314385                                               |
| 118.1692771                                              | 0.05863107                                                 | 0.261970716                                               |
| 61.26993578                                              | 0.071020408                                                | 0.239183673                                               |
| 117.6065726                                              | 0.057097931                                                | 0.271759565                                               |
| 136.1402545                                              | 0.05145034                                                 | 0.278536054                                               |
| 207.3243739                                              | 0.048155187                                                | 0.335687906                                               |
| 149.536593                                               | 0.049441612                                                | 0.291574247                                               |
| 139.9464524                                              | 0.059443602                                                | 0.289026939                                               |
| 145.9477408                                              | 0.05011482                                                 | 0.295966977                                               |
| 171.7663569                                              | 0.04797551                                                 | 0.308297959                                               |
| 258.7762986                                              | 0.044902602                                                | 0.334379939                                               |
| 168.272928                                               | 0.047919848                                                | 0.337573233                                               |
| 65.62198675                                              | 0.068457321                                                | 0.183642674                                               |
| 273.5745236                                              | 0.052432809                                                | 0.260295285                                               |
| 146.2702208                                              | 0.0496515                                                  | 0.294531678                                               |
| 108.3570487                                              | 0.064706158                                                | 0.249976592                                               |
| 221.9357178                                              | 0.044765286                                                | 0.356640105                                               |
| 152.910197                                               | 0.052673097                                                | 0.301389237                                               |
| 118.1119537                                              | 0.056435328                                                | 0.241482741                                               |
| 174.2807653                                              | 0.048299049                                                | 0.316283061                                               |
| 178.3305759                                              | 0.056117862                                                | 0.281715416                                               |
| 79.55694                                                 | 0.064251568                                                | 0.267049691                                               |
| 120.0175412                                              | 0.050368                                                   | 0.268224                                                  |
| 148.9340626                                              | 0.049993962                                                | 0.288491728                                               |
| 147.2207909                                              | 0.053463105                                                | 0.337129923                                               |
| 207.7171123                                              | 0.046844809                                                | 0.314831674                                               |
| 92.7826082                                               | 0.060120369                                                | 0.246559091                                               |
| 172.2623555                                              | 0.057555612                                                | 0.297044173                                               |
| 263.1942265                                              | 0.039514788                                                | 0.391963163                                               |
| 116.5098743                                              | 0.049607438                                                | 0.272654959                                               |
| 141.2316526                                              | 0.054054                                                   | 0.287                                                     |
| 166.6192612                                              | 0.050717974                                                | 0.284037077                                               |
| 152.3665543                                              | 0.05439821                                                 | 0.303026267                                               |
| 155.2549573                                              | 0.053827617                                                | 0.263544307                                               |
| 152.0673342                                              | 0.050442182                                                | 0.324037604                                               |
| 214.2873382                                              | 0.041976716                                                | 0.308731586                                               |
| 250.9230186                                              | 0.043969955                                                | 0.303359835                                               |
| 187.4030163                                              | 0.045994668                                                | 0.290125142                                               |
| 103.1355061                                              | 0.05598789                                                 | 0.288400706                                               |
| 220.3284544                                              | 0.045046854                                                | 0.297927613                                               |
| 186.8346053                                              | 0.050873569                                                | 0.312559084                                               |
| 191.9013153                                              | 0.049450025                                                | 0.309410387                                               |
| 121.5391928                                              | 0.058116727                                                | 0.243947411                                               |
| 126.7752602                                              | 0.050060452                                                | 0.255579518                                               |
| 119.4845397                                              | 0.054190855                                                | 0.330492722                                               |
| 157.7038753                                              | 0.048325449                                                | 0.287052655                                               |
| 151.2644783                                              | 0.046957175                                                | 0.29478007                                                |
| 107.3612319                                              | 0.055794945                                                | 0.324219418                                               |
| 188.5234011                                              | 0.050073685                                                | 0.309156283                                               |
| 68.91007888                                              | 0.071702653                                                | 0.239268991                                               |
| 142.3762458                                              | 0.048836387                                                | 0.274553645                                               |
| 281.6063663                                              | 0.04491155                                                 | 0.350426639                                               |
| 129.8550924                                              | 0.047451383                                                | 0.267348037                                               |
| 111.6069327                                              | 0.06162928                                                 | 0.276532299                                               |
| 210.6982082                                              | 0.04316106                                                 | 0.346534585                                               |
| 131.8133731                                              | 0.053679489                                                | 0.291283095                                               |
| 125.1980663                                              | 0.055042881                                                | 0.31453465                                                |
| 100.6164092                                              | 0.065147739                                                | 0.23257832                                                |
| 136.6789293                                              | 0.050417429                                                | 0.277789493                                               |
| 217.3166484                                              | 0.043623083                                                | 0.275500365                                               |
| 148.5186881                                              | 0.051043328                                                | 0.31864738                                                |
| 131.150146                                               | 0.050727744                                                | 0.299057042                                               |
| 146.2478648                                              | 0.05323125                                                 | 0.310234359                                               |
| 149.9200863                                              | 0.047121485                                                | 0.259720079                                               |
| 275.262764                                               | 0.045395443                                                | 0.324975974                                               |
| 185.3743318                                              | 0.057379119                                                | 0.289743158                                               |
| 145.9144942                                              | 0.057874483                                                | 0.282281963                                               |
| 128.0305009                                              | 0.051455736                                                | 0.263905721                                               |
| 113.1361132                                              | 0.066748393                                                | 0.266154678                                               |
| 244.1160144                                              | 0.039067714                                                | 0.337793902                                               |
| 127.8490196                                              | 0.049598129                                                | 0.277795199                                               |
| 148.1569185                                              | 0.054585324                                                | 0.290625734                                               |
| 87.55533225                                              | 0.068289225                                                | 0.258034026                                               |
| 182.0162065                                              | 0.047786359                                                | 0.294649267                                               |

| log.sigma.4.5.mm.3D_glszm_SizeZoneNonUniformity | log.sigma.4.5.mm.3D_glszm_GrayLevelNonUniformity | log.sigma.4.5.mm.3D_glszm_LargeAreaEmphasis | log.sigma.4.5.mm.3D_glszm_ZoneVariance |
|-------------------------------------------------|--------------------------------------------------|---------------------------------------------|----------------------------------------|
| 191.9784173                                     | 23.71223022                                      | 20.92086331                                 | 14.17581906                            |
| 55.58385093                                     | 7.633540373                                      | 8.850931677                                 | 4.205701941                            |
| 121.9371429                                     | 15.82285714                                      | 15.10285714                                 | 8.607640816                            |
| 54.20253165                                     | 7.151898734                                      | 6.632911392                                 | 2.479570582                            |
| 119.2198732                                     | 23.25369979                                      | 22.48837209                                 | 13.58956595                            |
| 42.36206897                                     | 5.896551724                                      | 7.74137931                                  | 3.389120095                            |
| 479.3429542                                     | 89.51612903                                      | 2111.022637                                 | 2075.44921                             |
| 558.2207053                                     | 81.0625711                                       | 125.519909                                  | 113.606024                             |
| 275.9477994                                     | 51.09007165                                      | 222.8577277                                 | 203.8277727                            |
| 62.92105263                                     | 12.22807018                                      | 29.58333333                                 | 18.61794014                            |
| 61.90592334                                     | 19.48083624                                      | 139.6655052                                 | 110.2717284                            |
| 188.1583452                                     | 38.45506419                                      | 380.4693295                                 | 356.8477883                            |
| 93.38943894                                     | 12.99339934                                      | 19.37623762                                 | 12.2122232                             |
| 115.1350482                                     | 13.15434084                                      | 7.344051447                                 | 3.056089164                            |
| 183.5884544                                     | 29.01489758                                      | 42.15456238                                 | 33.55230278                            |
| 409.4099561                                     | 67.37188873                                      | 500.2489019                                 | 482.4560686                            |
| 42.28888889                                     | 12.46666667                                      | 111.9388889                                 | 87.87441358                            |
| 57.21965318                                     | 7.63583815                                       | 11.34682081                                 | 5.757559558                            |
| 55.39408867                                     | 13.92610837                                      | 213.6650246                                 | 184.6219515                            |
| 655.723793                                      | 104.0178338                                      | 305.7751196                                 | 289.8203247                            |
| 168.9933333                                     | 31.18333333                                      | 41.25333333                                 | 29.25865556                            |
| 38.37278107                                     | 8.798816568                                      | 16.47337278                                 | 7.859668779                            |
| 44.56284153                                     | 9.273224044                                      | 22.21857923                                 | 12.92107856                            |
| 137.0219378                                     | 35.62888483                                      | 930.8720293                                 | 887.6299844                            |
| 130.460396                                      | 17.19306931                                      | 41.60891089                                 | 32.36971866                            |
| 236.3969466                                     | 36.66666667                                      | 63.24681934                                 | 52.67191112                            |
| 252.2049861                                     | 33.79778393                                      | 44.13573407                                 | 36.43164954                            |
| 139.3684211                                     | 31.19172932                                      | 89.94172932                                 | 72.00682274                            |
| 8.371428571                                     | 2.485714286                                      | 40.8                                        | 23.39918367                            |
| 122.0200445                                     | 25.63697105                                      | 47.13585746                                 | 34.27828235                            |
| 292.4628571                                     | 54.02285714                                      | 103.7857143                                 | 89.20786304                            |
| 112.1197605                                     | 16.08383234                                      | 10.80838323                                 | 5.242174334                            |
| 193.3137255                                     | 32.77978884                                      | 77.83559578                                 | 65.43202546                            |
| 177.4625407                                     | 36.49837134                                      | 109.8583062                                 | 94.38804921                            |
| 399.2594514                                     | 67.60489251                                      | 141.2031134                                 | 126.7247781                            |
| 215.8085714                                     | 33.58285714                                      | 26.71285714                                 | 19.03995714                            |
| 204.6405229                                     | 27.48039216                                      | 13.02287582                                 | 6.919069589                            |
| 496.2326531                                     | 70.44217687                                      | 628.2578231                                 | 612.5773007                            |
| 25.89361702                                     | 9.65248227                                       | 43.81560284                                 | 28.0417484                             |
| 440.4196217                                     | 88.71631206                                      | 677.2913712                                 | 646.11776                              |
| 133.1283186                                     | 22.44247788                                      | 27.89823009                                 | 19.10936643                            |
| 178.9832402                                     | 46.32960894                                      | 1916.472067                                 | 1853.717347                            |
| 347.7241026                                     | 43.64615385                                      | 18.69948718                                 | 12.54908718                            |
| 150.996008                                      | 26.38922156                                      | 23.88822355                                 | 15.85478942                            |
| 70.27147766                                     | 16.42268041                                      | 351.9243986                                 | 323.3331444                            |
| 265.9940547                                     | 40.61950059                                      | 28.3293698                                  | 20.17871822                            |
| 334.9596299                                     | 66.72413793                                      | 222.0058873                                 | 201.7521024                            |
| 40.32450331                                     | 9.701986755                                      | 30.69536424                                 | 20.12209991                            |
| 33.528                                          | 6.296                                            | 27.8                                        | 18.015616                              |
| 52.50549451                                     | 9.098901099                                      | 11.74725275                                 | 5.579398623                            |
| 158.4510638                                     | 25.12765957                                      | 36.58085106                                 | 29.08257583                            |
| 292.1637931                                     | 43.47198276                                      | 34.08728448                                 | 25.0808178                             |
| 248.285005                                      | 60.54121152                                      | 3991.831182                                 | 3929.095973                            |
| 119.1147132                                     | 23.0798005                                       | 108.2693267                                 | 91.5022419                             |
| 123.0764331                                     | 12.40764331                                      | 7.671974522                                 | 3.47860968                             |
| 119.9681818                                     | 21.82727273                                      | 14.56818182                                 | 7.424710744                            |
| 287                                             | 54.054                                           | 118.531                                     | 102.410775                             |
| 198.2578797                                     | 35.40114613                                      | 24.95558739                                 | 16.18618279                            |
| 83.02919708                                     | 14.90510949                                      | 19.15693431                                 | 11.40253876                            |
| 447.4982332                                     | 91.39929329                                      | 2466.12662                                  | 2424.971901                            |
| 150.3534483                                     | 23.40517241                                      | 27.36422414                                 | 19.16044423                            |
| 279.7108168                                     | 38.03090508                                      | 25.79359823                                 | 18.39111467                            |
| 723.5132075                                     | 104.8683438                                      | 170.8377358                                 | 158.9185948                            |
| 188.2912173                                     | 29.85053929                                      | 32.44684129                                 | 22.01662864                            |
| 65.46696035                                     | 12.7092511                                       | 21.63436123                                 | 12.7397776                             |
| 347.9794521                                     | 52.61472603                                      | 23.80565068                                 | 15.22697079                            |
| 52.82248521                                     | 8.597633136                                      | 10.68639053                                 | 4.915023984                            |
| 461.0214765                                     | 73.68053691                                      | 74.37114094                                 | 62.72426692                            |
| 338.1111111                                     | 80.54978355                                      | 379.6017316                                 | 350.2575456                            |
| 154.8811881                                     | 30.33663366                                      | 34.88778878                                 | 22.60311081                            |
| 61.80213904                                     | 10.13368984                                      | 17.92513369                                 | 11.00288827                            |
| 398.1420332                                     | 67.02739726                                      | 178.3684211                                 | 165.4716746                            |
| 142.6735537                                     | 22.72727273                                      | 29.94008264                                 | 22.3320598                             |
| 110.8830409                                     | 19.08187135                                      | 21.18128655                                 | 13.46523717                            |
| 248.8708075                                     | 40.30931677                                      | 454.757764                                  | 429.019473                             |
| 59.33870968                                     | 17.78225806                                      | 37.5483871                                  | 23.84644901                            |
| 172.1451356                                     | 30.62041467                                      | 44.15789474                                 | 31.74547795                            |
| 54.31612903                                     | 6.961290323                                      | 7.141935484                                 | 2.799417274                            |
| 114.6923077                                     | 20.35664336                                      | 21.78321678                                 | 12.38734847                            |
| 106.4649351                                     | 23.72727273                                      | 155.412987                                  | 133.5543262                            |
| 185.7425373                                     | 23.13432836                                      | 21.57835821                                 | 14.6975245                             |
| 87.09364548                                     | 16.05016722                                      | 16.34782609                                 | 8.716188857                            |
| 233.0701754                                     | 40.78677463                                      | 44.60728745                                 | 35.12321497                            |
| 98.61320755                                     | 27.62264151                                      | 165.2287736                                 | 145.2959183                            |
| 179.4520124                                     | 32.56965944                                      | 204.9241486                                 | 187.2607353                            |
| 50.96756757                                     | 8.07027027                                       | 22.49189189                                 | 14.25344047                            |
| 134.4691943                                     | 21.54028436                                      | 38.34597156                                 | 28.73890973                            |
| 243.4324324                                     | 41.29238329                                      | 523.3808354                                 | 501.1728897                            |
| 142.0873362                                     | 24.37991266                                      | 121.2991266                                 | 107.5055253                            |
| 112.1990741                                     | 20.35648148                                      | 26.22916667                                 | 16.21604402                            |
| 86.44360902                                     | 12.07518797                                      | 34.38345865                                 | 25.24761151                            |
| 154.7228464                                     | 30.64044944                                      | 277.588015                                  | 255.1055001                            |
| 285.9516288                                     | 58.62685094                                      | 143.7917078                                 | 124.0493447                            |
| 240.6820175                                     | 46.92763158                                      | 73.05263158                                 | 58.77550304                            |
| 171.6697674                                     | 43.05271318                                      | 216.296124                                  | 190.0086437                            |
| 309.419214                                      | 35.7860262                                       | 17.19868996                                 | 10.42505864                            |
| 212.7911227                                     | 37.9921671                                       | 32.25848564                                 | 22.01180048                            |
| 32.84070796                                     | 6.168141593                                      | 18.7699115                                  | 11.09750176                            |
| 23.73913043                                     | 6.282608696                                      | 18.06521739                                 | 9.579395085                            |
| 739.27501                                       | 119.8959745                                      | 141.5464328                                 | 129.1775728                            |

| log.sigma.4.5.mm.3D_glszm_ZonePercentage | log.sigma.4.5.mm.3D_glszm_LargeAreaLowGrayLevelEmphasis | log.sigma.4.5.mm.3D_glszm_LargeAreaHighGrayLevelEmphasis | log.sigma.4.5.mm.3D_glszm_HighGrayLevelZoneEmphasis |
|------------------------------------------|---------------------------------------------------------|----------------------------------------------------------|-----------------------------------------------------|
| 0.385041551                              | 0.171995772                                             | 4440.530576                                              | 335.2158273                                         |
| 0.463976945                              | 0.091725678                                             | 3021.080745                                              | 338.8819876                                         |
| 0.392376682                              | 0.101725269                                             | 4579.308571                                              | 332.5942857                                         |
| 0.49068323                               | 0.078312469                                             | 1981.183544                                              | 388.3734177                                         |
| 0.335223246                              | 0.325143459                                             | 4519.124736                                              | 217.8794926                                         |
| 0.479338843                              | 0.075034667                                             | 2246.224138                                              | 307.4482759                                         |
| 0.167662966                              | 17.83870086                                             | 265005.7765                                              | 188.8947368                                         |
| 0.289716546                              | 0.712449782                                             | 27243.66325                                              | 323.3441411                                         |
| 0.229235101                              | 2.485928188                                             | 27030.28454                                              | 236.8433982                                         |
| 0.301986755                              | 0.597754172                                             | 3566.592105                                              | 191.5175439                                         |
| 0.184447301                              | 2.587176489                                             | 10004.14983                                              | 122.087108                                          |
| 0.205752862                              | 3.833103358                                             | 46680.43081                                              | 197.4550642                                         |
| 0.373612824                              | 0.203992565                                             | 6324.214521                                              | 265.7491749                                         |
| 0.482919255                              | 0.153269606                                             | 2039.430868                                              | 329.9742765                                         |
| 0.340952381                              | 0.688596894                                             | 4553.364991                                              | 226.5344507                                         |
| 0.237070462                              | 3.68770165                                              | 77874.89751                                              | 217.8967789                                         |
| 0.20385051                               | 2.295181664                                             | 8880.366667                                              | 133.3888889                                         |
| 0.422982885                              | 0.173334945                                             | 3248.289017                                              | 335.2427746                                         |
| 0.185557587                              | 3.559627531                                             | 17342.64039                                              | 141.8719212                                         |
| 0.250353915                              | 0.638229269                                             | 150565.06                                                | 547.307525                                          |
| 0.288739172                              | 0.846626022                                             | 6966.851667                                              | 221.3383333                                         |
| 0.340725806                              | 0.27729855                                              | 4104.846154                                              | 257.7100592                                         |
| 0.327956989                              | 0.362533708                                             | 3947.661202                                              | 220.7377049                                         |
| 0.15207117                               | 8.993903279                                             | 108692.2852                                              | 183.8062157                                         |
| 0.328990228                              | 0.173971905                                             | 13760.39851                                              | 375.1014851                                         |
| 0.307511737                              | 0.313476217                                             | 15553.88295                                              | 404.0139949                                         |
| 0.360279441                              | 0.374333909                                             | 7116.567867                                              | 321.9861496                                         |
| 0.236129605                              | 1.117487928                                             | 10602.97744                                              | 205.7838346                                         |
| 0.239726027                              | 0.666684967                                             | 3535.085714                                              | 116.6857143                                         |
| 0.278881988                              | 0.605055993                                             | 6667.64588                                               | 213.674833                                          |
| 0.261910701                              | 1.216751147                                             | 13229.13048                                              | 240.2638095                                         |
| 0.423857868                              | 0.067018687                                             | 3520.158683                                              | 341.3922156                                         |
| 0.283940043                              | 0.722736282                                             | 11264.68175                                              | 257.3393665                                         |
| 0.254244306                              | 0.828208014                                             | 20303.41694                                              | 239.7899023                                         |
| 0.262809273                              | 1.468565934                                             | 16769.8169                                               | 246.0904374                                         |
| 0.36101083                               | 0.17453162                                              | 7571.507143                                              | 299.5371429                                         |
| 0.404761905                              | 0.070294564                                             | 5163.303922                                              | 419.0816993                                         |
| 0.252533929                              | 3.129148509                                             | 137005.5367                                              | 268.314966                                          |
| 0.251785714                              | 0.903971349                                             | 6905.723404                                              | 165.2624113                                         |
| 0.179104478                              | 1.761321611                                             | 270898.8552                                              | 491.3031915                                         |
| 0.337313433                              | 0.482615258                                             | 4012.904867                                              | 252.6283186                                         |
| 0.126234133                              | 15.40308018                                             | 250211.8268                                              | 201.5167598                                         |
| 0.403225806                              | 0.150408987                                             | 4699.277949                                              | 357.0369231                                         |
| 0.352816901                              | 0.362978457                                             | 3581.477046                                              | 254.9061876                                         |
| 0.187017995                              | 2.892083749                                             | 50863.42268                                              | 221.4570447                                         |
| 0.350270721                              | 0.300159865                                             | 4734.667063                                              | 281.8953627                                         |
| 0.222201458                              | 1.149706595                                             | 50500.20101                                              | 306.6534903                                         |
| 0.307535642                              | 0.743135918                                             | 3851.152318                                              | 146.2649007                                         |
| 0.319693095                              | 0.789947336                                             | 3856.944                                                 | 209.08                                              |
| 0.402654867                              | 0.083651485                                             | 3459.730769                                              | 290.5494505                                         |
| 0.365190365                              | 0.876060585                                             | 2781.308511                                              | 228.6893617                                         |
| 0.333213645                              | 0.206144334                                             | 7929.196121                                              | 350.0204741                                         |
| 0.126253761                              | 38.30210958                                             | 433394.7974                                              | 163.5888779                                         |
| 0.244214373                              | 0.570815524                                             | 23665.29676                                              | 299.0897756                                         |
| 0.488335925                              | 0.076852248                                             | 2904.242038                                              | 396.9808917                                         |
| 0.37414966                               | 0.410124858                                             | 2120.888636                                              | 211.8477273                                         |
| 0.249066002                              | 1.0664864                                               | 18357.271                                                | 239.966                                             |
| 0.33768747                               | 0.195826424                                             | 5382.095989                                              | 299.4484241                                         |
| 0.359108781                              | 0.228064945                                             | 3660.875912                                              | 251.2372263                                         |
| 0.155879923                              | 11.54422237                                             | 542096.1549                                              | 276.9310954                                         |
| 0.349134688                              | 0.232323032                                             | 4852.769397                                              | 244.3362069                                         |
| 0.367545639                              | 0.103477018                                             | 8654.309051                                              | 376.6412804                                         |
| 0.28965266                               | 0.626375462                                             | 50201.81174                                              | 438.4343816                                         |
| 0.309637405                              | 0.192548267                                             | 8995.48074                                               | 324.6209553                                         |
| 0.335302806                              | 0.350919948                                             | 2847.440529                                              | 178.30837                                           |
| 0.341420637                              | 0.112038939                                             | 7732.018836                                              | 383.0744863                                         |
| 0.416256158                              | 0.08567783                                              | 3392.147929                                              | 320.1301775                                         |
| 0.293018682                              | 0.495464722                                             | 14029.78322                                              | 318.3926174                                         |
| 0.18460309                               | 2.7428627                                               | 66878.62482                                              | 229.1385281                                         |
| 0.285310734                              | 0.199822317                                             | 8640.341584                                              | 253.5264026                                         |
| 0.380081301                              | 0.604371627                                             | 2425.245989                                              | 187.6203209                                         |
| 0.278458141                              | 1.145137125                                             | 36044.51766                                              | 269.9206921                                         |
| 0.362546816                              | 0.567053639                                             | 3333.795455                                              | 258.446281                                          |
| 0.36                                     | 0.388408363                                             | 2320.649123                                              | 170.8216374                                         |
| 0.197110676                              | 2.747067737                                             | 83745.7764                                               | 302.3763975                                         |
| 0.270152505                              | 0.732743756                                             | 3787.112903                                              | 139.3508065                                         |
| 0.283838841                              | 0.329403874                                             | 9983.570973                                              | 266.1419458                                         |
| 0.479876161                              | 0.037331432                                             | 3627.070968                                              | 480.4064516                                         |
| 0.326235741                              | 0.182881511                                             | 4657.407925                                              | 236.3752914                                         |
| 0.213888889                              | 1.809965669                                             | 17975.64675                                              | 191.3766234                                         |
| 0.381223329                              | 0.180990451                                             | 4498.878731                                              | 329.1455224                                         |
| 0.361985472                              | 0.120757305                                             | 4546.277592                                              | 245.826087                                          |
| 0.324715162                              | 0.955943266                                             | 5584.909582                                              | 203.8448043                                         |
| 0.223983096                              | 2.089329183                                             | 16165.49528                                              | 190.754717                                          |
| 0.237937385                              | 1.569864409                                             | 32136.13932                                              | 247.0309598                                         |
| 0.348399247                              | 0.060328928                                             | 11840.93514                                              | 431.1621622                                         |
| 0.322629969                              | 0.387537625                                             | 6376.92891                                               | 241.8009479                                         |
| 0.212200209                              | 5.678530568                                             | 62009.01229                                              | 217.8046683                                         |
| 0.26925338                               | 0.850149218                                             | 19731.05677                                              | 239.6113537                                         |
| 0.316020483                              | 0.277124075                                             | 5361.898148                                              | 276.0763889                                         |
| 0.330845771                              | 0.116017623                                             | 13609.15038                                              | 462.5639098                                         |
| 0.210900474                              | 1.557853567                                             | 57222.88951                                              | 303.6067416                                         |
| 0.225061098                              | 1.122789584                                             | 23035.74827                                              | 252.2813425                                         |
| 0.264654672                              | 0.747741492                                             | 10654.50877                                              | 234.4627193                                         |
| 0.195040822                              | 1.971885574                                             | 29281.00465                                              | 219.8356589                                         |
| 0.384228188                              | 0.103263842                                             | 5794.658297                                              | 385.040393                                          |
| 0.312398042                              | 0.333029079                                             | 5797.928198                                              | 229.5522193                                         |
| 0.361022364                              | 0.123686191                                             | 5488.300885                                              | 280.0707965                                         |
| 0.343283582                              | 0.156165708                                             | 3938.445652                                              | 182.6630435                                         |
| 0.284338169                              | 0.52856152                                              | 43618.4719                                               | 331.2279793                                         |

|                                             |                                                    |                                       |                                                         |
|---------------------------------------------|----------------------------------------------------|---------------------------------------|---------------------------------------------------------|
| log.sigma.4.5.mm.3D_glszm_SmallAreaEmphasis | log.sigma.4.5.mm.3D_glszm_LowGrayLevelZoneEmphasis | log.sigma.4.5.mm.3D_glszm_ZoneEntropy | log.sigma.4.5.mm.3D_glszm_SmallAreaLowGrayLevelEmphasis |
| 0.606701502                                 | 0.010703812                                        | 6.550737312                           | 0.006091213                                             |
| 0.59190628                                  | 0.014182547                                        | 5.93152365                            | 0.005790491                                             |
| 0.61162613                                  | 0.010040254                                        | 6.395011235                           | 0.007052438                                             |
| 0.582285406                                 | 0.015819044                                        | 5.911721078                           | 0.0063675                                               |
| 0.499578073                                 | 0.016958493                                        | 6.622765106                           | 0.005904792                                             |
| 0.620530855                                 | 0.016606983                                        | 5.745467419                           | 0.013075017                                             |
| 0.533974708                                 | 0.01741479                                         | 6.980615092                           | 0.007915656                                             |
| 0.579621911                                 | 0.006979803                                        | 6.818469084                           | 0.004045079                                             |
| 0.545495124                                 | 0.011206492                                        | 6.707847638                           | 0.006232948                                             |
| 0.536298861                                 | 0.021961373                                        | 6.231036406                           | 0.008733326                                             |
| 0.471530305                                 | 0.028740368                                        | 6.417299448                           | 0.01817379                                              |
| 0.530669561                                 | 0.018199265                                        | 6.697099747                           | 0.011671724                                             |
| 0.570175129                                 | 0.026944635                                        | 6.438564701                           | 0.01909264                                              |
| 0.629433041                                 | 0.015419051                                        | 6.254562704                           | 0.008661414                                             |
| 0.600785881                                 | 0.012804032                                        | 6.262678706                           | 0.006891067                                             |
| 0.561477801                                 | 0.013085415                                        | 6.747315494                           | 0.007617507                                             |
| 0.493872949                                 | 0.024073078                                        | 5.963327521                           | 0.006532769                                             |
| 0.591030195                                 | 0.014862284                                        | 6.148981427                           | 0.009622653                                             |
| 0.530968421                                 | 0.027691514                                        | 5.933551881                           | 0.014603518                                             |
| 0.547581351                                 | 0.002959641                                        | 7.06717555                            | 0.00186407                                              |
| 0.546437134                                 | 0.013503233                                        | 6.588158037                           | 0.007328425                                             |
| 0.455522567                                 | 0.017371829                                        | 6.32147328                            | 0.00617972                                              |
| 0.489904393                                 | 0.018972106                                        | 6.246563585                           | 0.005693442                                             |
| 0.511324926                                 | 0.012530833                                        | 6.535073628                           | 0.006504376                                             |
| 0.587550954                                 | 0.009170325                                        | 6.56957379                            | 0.004793806                                             |
| 0.560338922                                 | 0.005785585                                        | 6.698788033                           | 0.003634793                                             |
| 0.611486067                                 | 0.010293572                                        | 6.508555722                           | 0.005188234                                             |
| 0.524908064                                 | 0.014851923                                        | 6.558936321                           | 0.007818132                                             |
| 0.488490548                                 | 0.048648116                                        | 4.843568731                           | 0.040401123                                             |
| 0.531568849                                 | 0.012757787                                        | 6.518737023                           | 0.007368473                                             |
| 0.538876231                                 | 0.009914966                                        | 6.742627091                           | 0.005197161                                             |
| 0.594920713                                 | 0.011253714                                        | 6.320476531                           | 0.008431809                                             |
| 0.552250395                                 | 0.010937219                                        | 6.621263333                           | 0.005768559                                             |
| 0.554736476                                 | 0.009586356                                        | 6.501596811                           | 0.005986183                                             |
| 0.558872555                                 | 0.010791955                                        | 6.79575249                            | 0.005975175                                             |
| 0.57047773                                  | 0.012844857                                        | 6.570978195                           | 0.007396507                                             |
| 0.597514844                                 | 0.00732284                                         | 6.591240517                           | 0.004543108                                             |
| 0.601804593                                 | 0.009785748                                        | 6.692494959                           | 0.006093809                                             |
| 0.394992                                    | 0.020253157                                        | 6.075350157                           | 0.004583198                                             |
| 0.522391717                                 | 0.003414956                                        | 7.029642714                           | 0.002009046                                             |
| 0.548972962                                 | 0.011184102                                        | 6.416628059                           | 0.004240663                                             |
| 0.512862778                                 | 0.012739029                                        | 6.707784415                           | 0.006305306                                             |
| 0.617430178                                 | 0.007436851                                        | 6.56516349                            | 0.003926285                                             |
| 0.563253709                                 | 0.011516429                                        | 6.448915601                           | 0.005072484                                             |
| 0.495855952                                 | 0.013941151                                        | 6.371929939                           | 0.00816954                                              |
| 0.579192259                                 | 0.008955458                                        | 6.603967147                           | 0.005019198                                             |
| 0.544888095                                 | 0.006121243                                        | 6.742268634                           | 0.003601357                                             |
| 0.510725393                                 | 0.031000587                                        | 5.889525499                           | 0.017088934                                             |
| 0.521016554                                 | 0.026066776                                        | 5.936437961                           | 0.010613129                                             |
| 0.522984527                                 | 0.015314514                                        | 6.051543832                           | 0.010788527                                             |
| 0.597710989                                 | 0.013462286                                        | 6.217871997                           | 0.005298932                                             |
| 0.579778286                                 | 0.008431356                                        | 6.724752661                           | 0.004559045                                             |
| 0.508698638                                 | 0.017652442                                        | 6.823340773                           | 0.006815964                                             |
| 0.56234761                                  | 0.008059521                                        | 6.414052155                           | 0.005621272                                             |
| 0.649421691                                 | 0.011486063                                        | 6.289837569                           | 0.006169746                                             |
| 0.526984741                                 | 0.016887523                                        | 6.548598724                           | 0.009317607                                             |
| 0.551433294                                 | 0.009502527                                        | 6.693188662                           | 0.00490846                                              |
| 0.541905288                                 | 0.007787701                                        | 6.600800676                           | 0.004800218                                             |
| 0.56506923                                  | 0.012617284                                        | 6.239195353                           | 0.005406439                                             |
| 0.525164556                                 | 0.007834943                                        | 6.985029767                           | 0.004244025                                             |
| 0.587700524                                 | 0.011266265                                        | 6.450766931                           | 0.005670816                                             |
| 0.570100483                                 | 0.007560443                                        | 6.823781394                           | 0.00541637                                              |
| 0.566757376                                 | 0.004556009                                        | 7.010206569                           | 0.002939174                                             |
| 0.553953791                                 | 0.009442175                                        | 6.7983758                             | 0.004637782                                             |
| 0.54384635                                  | 0.022146766                                        | 6.159320183                           | 0.012126715                                             |
| 0.559002231                                 | 0.005827609                                        | 6.859337478                           | 0.002966945                                             |
| 0.574415358                                 | 0.014061007                                        | 6.062589553                           | 0.010839233                                             |
| 0.573805328                                 | 0.007698532                                        | 6.794398147                           | 0.003766763                                             |
| 0.502919852                                 | 0.009305914                                        | 6.943965473                           | 0.00449585                                              |
| 0.517624136                                 | 0.009809235                                        | 6.791008137                           | 0.006024491                                             |
| 0.588936808                                 | 0.037133208                                        | 5.86842666                            | 0.015545476                                             |
| 0.547972184                                 | 0.010962224                                        | 6.83201191                            | 0.005562583                                             |
| 0.554408563                                 | 0.01375626                                         | 6.563397153                           | 0.006278875                                             |
| 0.588218931                                 | 0.022386274                                        | 6.21012488                            | 0.01486831                                              |
| 0.575106924                                 | 0.008481057                                        | 6.694089361                           | 0.003769199                                             |
| 0.49226807                                  | 0.020704251                                        | 6.147733447                           | 0.007889487                                             |
| 0.538816008                                 | 0.011323645                                        | 6.751121114                           | 0.00642594                                              |
| 0.608860703                                 | 0.012976441                                        | 6.037451199                           | 0.011455717                                             |
| 0.52750744                                  | 0.01964203                                         | 6.635590646                           | 0.013660413                                             |
| 0.540555961                                 | 0.018021322                                        | 6.413863881                           | 0.011419542                                             |
| 0.607993333                                 | 0.010974054                                        | 6.536533926                           | 0.006156941                                             |
| 0.553824828                                 | 0.012664795                                        | 6.236407736                           | 0.009010099                                             |
| 0.576331784                                 | 0.012507494                                        | 6.410118581                           | 0.005633998                                             |
| 0.473507315                                 | 0.016111647                                        | 6.419698901                           | 0.006604711                                             |
| 0.536679147                                 | 0.010614965                                        | 6.665239292                           | 0.005890675                                             |
| 0.530887307                                 | 0.010807032                                        | 6.359975328                           | 0.0087647                                               |
| 0.583197383                                 | 0.014165625                                        | 6.432514121                           | 0.007799784                                             |
| 0.55999559                                  | 0.014962617                                        | 6.619924718                           | 0.006545234                                             |
| 0.571045175                                 | 0.011818274                                        | 6.373213522                           | 0.007240617                                             |
| 0.516562678                                 | 0.011850952                                        | 6.689582165                           | 0.006906654                                             |
| 0.589836534                                 | 0.008602012                                        | 6.264289322                           | 0.006853994                                             |
| 0.551693867                                 | 0.00807386                                         | 6.378826385                           | 0.003702888                                             |
| 0.54827165                                  | 0.008379903                                        | 6.726630453                           | 0.004311002                                             |
| 0.523651457                                 | 0.011846388                                        | 6.850327058                           | 0.006248423                                             |
| 0.527678034                                 | 0.009503038                                        | 6.436412662                           | 0.006102928                                             |
| 0.601839201                                 | 0.007515675                                        | 6.84328316                            | 0.00360563                                              |
| 0.538180424                                 | 0.013140045                                        | 6.702393957                           | 0.00735111                                              |
| 0.534010531                                 | 0.018054883                                        | 5.779923431                           | 0.012876662                                             |
| 0.504936942                                 | 0.023469828                                        | 5.596559646                           | 0.01605768                                              |
| 0.558631468                                 | 0.00577104                                         | 6.963772751                           | 0.003515494                                             |



| log.sigma.4.0.mm.3D_gldm_GrayLevelVariance | log.sigma.4.0.mm.3D_gldm_HighGrayLevelEmphasis | log.sigma.4.0.mm.3D_gldm_GrayLevelNonUniformityNormalized | log.sigma.4.0.mm.3D_gldm_DependenceEntropy |
|--------------------------------------------|------------------------------------------------|-----------------------------------------------------------|--------------------------------------------|
| 39.42440397                                | 302.1606648                                    | 0.045769676                                               | 6.852909224                                |
| 37.98068251                                | 282.1325648                                    | 0.050369989                                               | 6.269501578                                |
| 36.02126903                                | 292.2006726                                    | 0.046650345                                               | 6.63166423                                 |
| 44.01987771                                | 323.6987578                                    | 0.044867096                                               | 6.244078429                                |
| 32.42832237                                | 211.1459957                                    | 0.049804588                                               | 6.653134085                                |
| 37.04145892                                | 266.7768595                                    | 0.048698859                                               | 6.027989583                                |
| 17.06083259                                | 166.8241769                                    | 0.090349599                                               | 7.318344813                                |
| 28.46963202                                | 264.1133817                                    | 0.055867929                                               | 7.114235823                                |
| 21.64473755                                | 157.9676208                                    | 0.068692896                                               | 7.038167933                                |
| 22.08114381                                | 179.4423841                                    | 0.059813166                                               | 6.486632541                                |
| 11.17045015                                | 114.5533419                                    | 0.09230956                                                | 6.467526988                                |
| 17.82315006                                | 172.0581156                                    | 0.076385063                                               | 7.064360834                                |
| 39.28672796                                | 326.0690506                                    | 0.048845939                                               | 6.646836763                                |
| 42.0952606                                 | 324.4813665                                    | 0.043777246                                               | 6.457147706                                |
| 27.53680383                                | 173.7701587                                    | 0.056875586                                               | 6.856205086                                |
| 25.18303163                                | 182.9770913                                    | 0.065605474                                               | 7.362888436                                |
| 14.03919255                                | 103.3556059                                    | 0.073820459                                               | 6.425988619                                |
| 42.00512909                                | 257.2836186                                    | 0.046131958                                               | 6.385627144                                |
| 11.26162732                                | 102.8363803                                    | 0.08940072                                                | 6.569292279                                |
| 23.89265624                                | 358.0779702                                    | 0.061871865                                               | 7.172432998                                |
| 28.04153509                                | 182.0259865                                    | 0.05293922                                                | 6.736594448                                |
| 17.50988147                                | 223.1149194                                    | 0.058565297                                               | 6.326894161                                |
| 26.0245115                                 | 179.7311828                                    | 0.05615935                                                | 6.411298885                                |
| 11.52708034                                | 109.706144                                     | 0.103655171                                               | 6.854464273                                |
| 33.60713907                                | 313.7605863                                    | 0.052076149                                               | 7.099756637                                |
| 33.04156335                                | 416.6404538                                    | 0.05318181                                                | 7.087001451                                |
| 32.10310791                                | 268.9466068                                    | 0.051058064                                               | 6.804121008                                |
| 18.6711442                                 | 138.8814913                                    | 0.065236094                                               | 6.761739568                                |
| 10.80657722                                | 98.4726074                                     | 0.092137362                                               | 5.738539823                                |
| 20.83043131                                | 183.163354                                     | 0.061643455                                               | 6.659580279                                |
| 25.6079863                                 | 197.329758                                     | 0.056152343                                               | 7.061842228                                |
| 35.6074493                                 | 288.5304569                                    | 0.048664614                                               | 6.542198168                                |
| 26.65201161                                | 214.1601713                                    | 0.057624364                                               | 7.092464134                                |
| 22.40888272                                | 211.0815735                                    | 0.063712048                                               | 6.948755261                                |
| 23.74548758                                | 219.4946425                                    | 0.060717773                                               | 7.061309052                                |
| 32.53623128                                | 334.1021145                                    | 0.049334246                                               | 6.930379222                                |
| 42.65745465                                | 424.3015873                                    | 0.045256117                                               | 6.74877299                                 |
| 25.88476463                                | 199.4849682                                    | 0.077311292                                               | 7.379235753                                |
| 17.76823661                                | 157.8946429                                    | 0.070408163                                               | 6.140870963                                |
| 17.07343342                                | 497.2060972                                    | 0.078423436                                               | 7.248545653                                |
| 30.73801014                                | 220.6634328                                    | 0.050744041                                               | 6.668547139                                |
| 9.638359989                                | 147.9661495                                    | 0.112765912                                               | 6.886664029                                |
| 40.4034644                                 | 335.9789082                                    | 0.043574829                                               | 6.954869257                                |
| 31.49950208                                | 223.1464789                                    | 0.049788732                                               | 6.71842401                                 |
| 16.2791198                                 | 141.5147815                                    | 0.088767422                                               | 6.931628028                                |
| 30.8810625                                 | 236.3931695                                    | 0.050130959                                               | 6.910033354                                |
| 18.69831843                                | 248.4040366                                    | 0.067338088                                               | 7.0293442                                  |
| 15.92827307                                | 135.4541752                                    | 0.074418971                                               | 6.225049548                                |
| 28.81429347                                | 190.0588235                                    | 0.054794252                                               | 6.243698838                                |
| 33.0543308                                 | 326.4336283                                    | 0.050933902                                               | 6.275512195                                |
| 29.95935809                                | 202.6969697                                    | 0.054096038                                               | 6.615496119                                |
| 31.14683806                                | 309.3716338                                    | 0.051259085                                               | 6.871283944                                |
| 10.38964637                                | 114.4623872                                    | 0.119349963                                               | 7.118144555                                |
| 17.71453072                                | 298.7771011                                    | 0.068831866                                               | 6.809754317                                |
| 47.51737215                                | 351.3499222                                    | 0.04118283                                                | 6.543442201                                |
| 32.95767967                                | 192.627551                                     | 0.04882225                                                | 6.559049548                                |
| 22.50221235                                | 185.7688667                                    | 0.061619797                                               | 7.092783427                                |
| 29.22800316                                | 309.0899855                                    | 0.051579068                                               | 6.632061982                                |
| 24.93653561                                | 181.5635649                                    | 0.056201893                                               | 6.367824326                                |
| 14.72264618                                | 251.7916093                                    | 0.092586155                                               | 7.301661506                                |
| 24.91356049                                | 245.6674191                                    | 0.056492291                                               | 6.79276177                                 |
| 34.71000926                                | 329.7829615                                    | 0.047817683                                               | 6.91973449                                 |
| 31.44892684                                | 390.7479961                                    | 0.051373243                                               | 7.257816895                                |
| 31.226064                                  | 301.1822519                                    | 0.051373754                                               | 6.926611017                                |
| 21.06657008                                | 162.1742984                                    | 0.060111841                                               | 6.410043289                                |
| 31.43372148                                | 359.677872                                     | 0.050103471                                               | 6.848224174                                |
| 30.68082215                                | 301.226601                                     | 0.055279187                                               | 6.190000928                                |
| 26.86042512                                | 330.4285152                                    | 0.057167349                                               | 6.915492509                                |
| 17.3361863                                 | 190.3736015                                    | 0.069777994                                               | 7.064232275                                |
| 24.55626022                                | 256.5447269                                    | 0.056318516                                               | 6.760829395                                |
| 28.91719545                                | 189.0528455                                    | 0.053680019                                               | 6.293383476                                |
| 27.30412984                                | 283.7861875                                    | 0.059830206                                               | 7.071154406                                |
| 35.9806837                                 | 195.2696629                                    | 0.047921559                                               | 6.687989513                                |
| 22.97041551                                | 152.6905263                                    | 0.058504155                                               | 6.407118673                                |
| 20.05911222                                | 217.1851126                                    | 0.078864775                                               | 7.122891486                                |
| 15.32898553                                | 149.3638344                                    | 0.069835438                                               | 6.330569399                                |
| 25.05831303                                | 259.651426                                     | 0.055886645                                               | 6.753276887                                |
| 45.82319393                                | 469.1888545                                    | 0.050810417                                               | 6.279412568                                |
| 26.37883792                                | 250.626616                                     | 0.055039107                                               | 6.627308716                                |
| 15.56918395                                | 155.0977778                                    | 0.073817284                                               | 6.759542327                                |
| 38.66731484                                | 298.2759602                                    | 0.046505628                                               | 6.845555995                                |
| 25.69240161                                | 244.3813559                                    | 0.056320316                                               | 6.482547117                                |
| 25.11916373                                | 166.8773006                                    | 0.057978033                                               | 6.91110954                                 |
| 15.76456983                                | 146.844691                                     | 0.072081115                                               | 6.572105731                                |
| 22.48341816                                | 198.6051565                                    | 0.06628247                                                | 7.041140048                                |
| 28.06320023                                | 399.2241055                                    | 0.077255365                                               | 6.110655687                                |
| 25.66670174                                | 219.4892966                                    | 0.05500145                                                | 6.669029613                                |
| 20.20677136                                | 148.9606361                                    | 0.080444197                                               | 7.224264611                                |
| 20.02893481                                | 207.031746                                     | 0.065746504                                               | 6.831074328                                |
| 30.49432945                                | 240.7125091                                    | 0.051086617                                               | 6.665380817                                |
| 30.89407905                                | 395.7325871                                    | 0.05430868                                                | 6.785358354                                |
| 17.63560813                                | 176.0951817                                    | 0.074016569                                               | 6.955320758                                |
| 18.19459676                                | 186.7847145                                    | 0.066045261                                               | 6.820251469                                |
| 22.99563079                                | 192.9930354                                    | 0.058992586                                               | 6.859596995                                |
| 14.91310832                                | 190.5657696                                    | 0.070747566                                               | 6.649746339                                |
| 44.36936681                                | 395.4286913                                    | 0.041750301                                               | 6.905684987                                |
| 28.5851913                                 | 215.6231648                                    | 0.051045656                                               | 6.747735285                                |
| 25.26648225                                | 303.399361                                     | 0.062560606                                               | 6.117777004                                |
| 19.08559813                                | 201.738806                                     | 0.077940521                                               | 5.845565618                                |
| 27.36856653                                | 361.9259973                                    | 0.054343646                                               | 7.165011424                                |

| log.sigma.4.0.mm.3D_gldm_DependenceNonUniformity | log.sigma.4.0.mm.3D_gldm_GrayLevelNonUniformity | log.sigma.4.0.mm.3D_gldm_SmallDependenceEmphasis |
|--------------------------------------------------|-------------------------------------------------|--------------------------------------------------|
| 313.4889197                                      | 66.09141274                                     | 0.333293085                                      |
| 85.78386167                                      | 17.47838617                                     | 0.362225424                                      |
| 209.5784753                                      | 41.61210762                                     | 0.327363312                                      |
| 88.69565217                                      | 14.44720497                                     | 0.418528295                                      |
| 316.794472                                       | 70.27427356                                     | 0.310536738                                      |
| 63.52066116                                      | 11.78512397                                     | 0.364535124                                      |
| 1012.367872                                      | 952.1944207                                     | 0.165334511                                      |
| 1002.906065                                      | 339.006592                                      | 0.262121849                                      |
| 575.6081652                                      | 292.7691225                                     | 0.217343421                                      |
| 148.4543046                                      | 45.1589404                                      | 0.269937987                                      |
| 237.4447301                                      | 143.6336761                                     | 0.171662453                                      |
| 428.5837981                                      | 260.2439096                                     | 0.197992214                                      |
| 175.8557337                                      | 39.61405672                                     | 0.312923428                                      |
| 173.1708075                                      | 28.19254658                                     | 0.409148309                                      |
| 269.16                                           | 89.57904762                                     | 0.307287351                                      |
| 693.8514405                                      | 378.0187435                                     | 0.212825402                                      |
| 153.4779162                                      | 65.18346546                                     | 0.198019028                                      |
| 101.2885086                                      | 18.86797066                                     | 0.357649735                                      |
| 150.2888483                                      | 97.80438757                                     | 0.174580491                                      |
| 1396.297615                                      | 568.1693346                                     | 0.228090182                                      |
| 421.9345525                                      | 110.0076997                                     | 0.237417161                                      |
| 113.1008065                                      | 29.0483871                                      | 0.32287757                                       |
| 112.4982079                                      | 31.33691756                                     | 0.294263524                                      |
| 387.8345844                                      | 372.8476508                                     | 0.155723151                                      |
| 190.2947883                                      | 63.9495114                                      | 0.286572473                                      |
| 425.9209703                                      | 135.9327074                                     | 0.270534282                                      |
| 408.6786427                                      | 102.3203593                                     | 0.304339776                                      |
| 382.6591212                                      | 146.9769197                                     | 0.222769276                                      |
| 23.82191781                                      | 13.45205479                                     | 0.199499593                                      |
| 299.7614907                                      | 99.24596273                                     | 0.249703536                                      |
| 658.4203043                                      | 225.1147418                                     | 0.231539034                                      |
| 181.4517766                                      | 38.34771574                                     | 0.358723871                                      |
| 364.7319058                                      | 134.5528908                                     | 0.242961744                                      |
| 358.6447205                                      | 153.8645963                                     | 0.227504824                                      |
| 815.6362751                                      | 311.6643289                                     | 0.234276733                                      |
| 385.7797834                                      | 95.65910263                                     | 0.314453356                                      |
| 362.1626984                                      | 68.42724868                                     | 0.353209303                                      |
| 633.5349596                                      | 450.0290328                                     | 0.2187973                                        |
| 120.8428571                                      | 39.42857143                                     | 0.242984846                                      |
| 1089.107547                                      | 740.8662009                                     | 0.179573316                                      |
| 284.8895522                                      | 67.99701493                                     | 0.278145809                                      |
| 594.2863188                                      | 639.6082511                                     | 0.140260658                                      |
| 537.1894127                                      | 105.3639371                                     | 0.336404238                                      |
| 300.128169                                       | 70.7                                            | 0.30121833                                       |
| 181.1696658                                      | 138.122108                                      | 0.17300038                                       |
| 473.0824656                                      | 120.3644315                                     | 0.298644807                                      |
| 753.1468884                                      | 360.3261073                                     | 0.204804548                                      |
| 92.11201629                                      | 36.53971487                                     | 0.235462017                                      |
| 95.0971867                                       | 21.42455243                                     | 0.3116329                                        |
| 113.9115044                                      | 23.02212389                                     | 0.343587758                                      |
| 256.1406371                                      | 69.62160062                                     | 0.324468775                                      |
| 565.081149                                       | 142.756553                                      | 0.293897204                                      |
| 624.3219659                                      | 951.9353059                                     | 0.125233832                                      |
| 261.6138855                                      | 113.0219245                                     | 0.222636999                                      |
| 173.2581649                                      | 26.4805988                                      | 0.387874088                                      |
| 270.2619048                                      | 57.41496599                                     | 0.287314439                                      |
| 604.9556663                                      | 247.4034869                                     | 0.224959264                                      |
| 453.6976294                                      | 106.6139332                                     | 0.291676574                                      |
| 170.378768                                       | 42.88204456                                     | 0.303988112                                      |
| 1032.286881                                      | 1008.54099                                      | 0.152709746                                      |
| 251.8036117                                      | 75.07825433                                     | 0.292701465                                      |
| 531.9809331                                      | 117.8705882                                     | 0.299025386                                      |
| 1371.969152                                      | 423.0072869                                     | 0.26700808                                       |
| 411.7290076                                      | 107.6793893                                     | 0.27100842                                       |
| 139.5317578                                      | 40.6957164                                      | 0.290447143                                      |
| 737.7407191                                      | 171.4039754                                     | 0.305065354                                      |
| 104.6748768                                      | 22.44334975                                     | 0.344945265                                      |
| 936.1815143                                      | 290.6959685                                     | 0.268152635                                      |
| 1011.39984                                       | 523.8931806                                     | 0.181233097                                      |
| 422.720339                                       | 119.6205273                                     | 0.251484246                                      |
| 116.6260163                                      | 26.41056911                                     | 0.330812109                                      |
| 781.2087934                                      | 298.0142542                                     | 0.245084869                                      |
| 290.7138577                                      | 63.9752809                                      | 0.320731403                                      |
| 204.8357895                                      | 55.57894737                                     | 0.322525413                                      |
| 484.3266405                                      | 322.0837414                                     | 0.194267846                                      |
| 187.4858388                                      | 64.10893246                                     | 0.21758312                                       |
| 425.432775                                       | 123.4535989                                     | 0.246863406                                      |
| 88.18266254                                      | 16.41176471                                     | 0.382908497                                      |
| 280.3201521                                      | 72.37642586                                     | 0.28236417                                       |
| 271.8377778                                      | 132.8711111                                     | 0.199925094                                      |
| 303.4139403                                      | 65.38691323                                     | 0.326559936                                      |
| 180.9491525                                      | 46.52058111                                     | 0.301709589                                      |
| 387.2559159                                      | 132.305872                                      | 0.26787213                                       |
| 327.4384575                                      | 136.449551                                      | 0.213916185                                      |
| 381.1178637                                      | 179.9569061                                     | 0.207292361                                      |
| 113.8888889                                      | 41.02259887                                     | 0.269711794                                      |
| 260.6880734                                      | 71.94189602                                     | 0.301605699                                      |
| 406.6506778                                      | 308.5839416                                     | 0.186195237                                      |
| 269.6078777                                      | 111.8348031                                     | 0.251648154                                      |
| 294.9517191                                      | 69.835406                                       | 0.303248931                                      |
| 141.539801                                       | 43.6641791                                      | 0.257941692                                      |
| 321.4186414                                      | 187.4099526                                     | 0.195994892                                      |
| 764.7053988                                      | 297.2697178                                     | 0.213367371                                      |
| 610.2315728                                      | 203.2884504                                     | 0.230335059                                      |
| 555.1548231                                      | 233.9622014                                     | 0.204155593                                      |
| 555.4790268                                      | 99.53271812                                     | 0.356665544                                      |
| 523.3972268                                      | 125.1639478                                     | 0.273221842                                      |
| 66.65495208                                      | 19.58146965                                     | 0.333273873                                      |
| 60.82835821                                      | 20.8880597                                      | 0.249342319                                      |
| 1489.946056                                      | 479.5283318                                     | 0.261848255                                      |

| log.sigma.4.0.mm.3D_gldm_DependenceNonUniformityNormalized | log.sigma.4.0.mm.3D_gldm_DependenceVariance | log.sigma.4.0.mm.3D_gldm_LargeDependenceEmphasis |
|------------------------------------------------------------|---------------------------------------------|--------------------------------------------------|
| 0.21709759                                                 | 2.52741308                                  | 9.972299169                                      |
| 0.24721574                                                 | 1.327741282                                 | 7.201729107                                      |
| 0.234953448                                                | 1.715156146                                 | 8.479820628                                      |
| 0.275452336                                                | 1.109563674                                 | 5.944099379                                      |
| 0.224517698                                                | 1.772697159                                 | 9.014174344                                      |
| 0.262482071                                                | 1.115702479                                 | 6.702479339                                      |
| 0.096059196                                                | 24.40532348                                 | 60.04981497                                      |
| 0.165277862                                                | 6.877532005                                 | 19.41529334                                      |
| 0.135055881                                                | 11.45132864                                 | 29.92397935                                      |
| 0.196628218                                                | 2.314887944                                 | 11.42649007                                      |
| 0.152599441                                                | 4.541791952                                 | 20.1940874                                       |
| 0.125795068                                                | 10.98241065                                 | 31.48547109                                      |
| 0.216838143                                                | 2.252058244                                 | 9.914919852                                      |
| 0.268898769                                                | 1.448449134                                 | 6.630434783                                      |
| 0.170895238                                                | 4.825890249                                 | 15.52190476                                      |
| 0.120418508                                                | 15.90723529                                 | 38.56959389                                      |
| 0.173814175                                                | 3.139608228                                 | 15.55266138                                      |
| 0.247649165                                                | 1.450170671                                 | 7.4400978                                        |
| 0.137375547                                                | 5.872868129                                 | 23.4606947                                       |
| 0.152052446                                                | 6.249075743                                 | 20.45137755                                      |
| 0.203048389                                                | 2.21046742                                  | 11.75553417                                      |
| 0.228025819                                                | 1.68496358                                  | 8.596774194                                      |
| 0.201609692                                                | 2.059338909                                 | 10.40501792                                      |
| 0.10782168                                                 | 13.9359507                                  | 41.18626633                                      |
| 0.154963183                                                | 11.76663413                                 | 26.49022801                                      |
| 0.166635747                                                | 4.497195221                                 | 15.84428795                                      |
| 0.203931458                                                | 2.426452484                                 | 10.58483034                                      |
| 0.169844262                                                | 4.643076874                                 | 17.12250333                                      |
| 0.163163821                                                | 3.807656221                                 | 17.5890411                                       |
| 0.186187261                                                | 2.782176614                                 | 12.85590062                                      |
| 0.164235546                                                | 5.420099986                                 | 18.35245697                                      |
| 0.230268752                                                | 1.617240846                                 | 8.007614213                                      |
| 0.156202101                                                | 5.311833976                                 | 18.3490364                                       |
| 0.148507131                                                | 7.264795168                                 | 22.27039337                                      |
| 0.158900502                                                | 6.7511017                                   | 20.39918177                                      |
| 0.198958114                                                | 3.501208201                                 | 12.19443012                                      |
| 0.239525594                                                | 1.600527351                                 | 7.857142857                                      |
| 0.108836104                                                | 23.31123357                                 | 52.54475176                                      |
| 0.215790816                                                | 1.874885204                                 | 10.81071429                                      |
| 0.115286075                                                | 12.05925979                                 | 35.16576691                                      |
| 0.212604143                                                | 2.215491201                                 | 10.54776119                                      |
| 0.104775444                                                | 15.61459852                                 | 45.12447109                                      |
| 0.222162702                                                | 2.340107725                                 | 9.557485525                                      |
| 0.211357866                                                | 2.386929181                                 | 10.42535211                                      |
| 0.116432947                                                | 14.36828332                                 | 38.70437018                                      |
| 0.197035596                                                | 3.790070464                                 | 12.96584756                                      |
| 0.140748811                                                | 6.711723918                                 | 22.79405719                                      |
| 0.187600848                                                | 3.003430382                                 | 13.58248473                                      |
| 0.243215311                                                | 1.444705359                                 | 8.130434783                                      |
| 0.252016603                                                | 1.238331114                                 | 7.225663717                                      |
| 0.199021474                                                | 3.092821708                                 | 11.48795649                                      |
| 0.202901669                                                | 2.310675619                                 | 10.63447038                                      |
| 0.078275071                                                | 22.87230322                                 | 67.85105316                                      |
| 0.159326361                                                | 4.38581926                                  | 17.35809988                                      |
| 0.269452822                                                | 1.21713198                                  | 6.465007776                                      |
| 0.229814545                                                | 1.567515271                                 | 8.962585034                                      |
| 0.150673889                                                | 8.088189836                                 | 23.33026152                                      |
| 0.219495708                                                | 2.252251088                                 | 10.17755201                                      |
| 0.223301138                                                | 2.18561964                                  | 9.796854522                                      |
| 0.094766077                                                | 25.61188941                                 | 62.57110071                                      |
| 0.189468481                                                | 3.387744934                                 | 12.70654628                                      |
| 0.215813766                                                | 3.138151402                                 | 11.48356998                                      |
| 0.166622438                                                | 6.273913521                                 | 18.44328394                                      |
| 0.196435595                                                | 2.840951139                                 | 12.08301527                                      |
| 0.20610304                                                 | 2.453722108                                 | 10.86115214                                      |
| 0.215650605                                                | 2.098262866                                 | 9.782227419                                      |
| 0.257819894                                                | 1.189982771                                 | 7.064039409                                      |
| 0.184106492                                                | 3.540261184                                 | 13.62104228                                      |
| 0.134709622                                                | 6.737127636                                 | 24.43580181                                      |
| 0.199020875                                                | 2.556038778                                 | 12.03107345                                      |
| 0.237044748                                                | 1.594817899                                 | 8.195121951                                      |
| 0.156837742                                                | 6.230868467                                 | 19.74804256                                      |
| 0.217763189                                                | 2.488683528                                 | 10.08314607                                      |
| 0.21561662                                                 | 2.073178947                                 | 9.471578947                                      |
| 0.118591244                                                | 11.0406776                                  | 32.49363369                                      |
| 0.20423294                                                 | 2.094161315                                 | 11.9912854                                       |
| 0.192590663                                                | 2.376844306                                 | 12.10819375                                      |
| 0.273011339                                                | 1.23179557                                  | 6.523219814                                      |
| 0.213171218                                                | 1.988101028                                 | 10.08136882                                      |
| 0.151020988                                                | 5.40881358                                  | 20.26555556                                      |
| 0.215799389                                                | 2.552527372                                 | 10.13655761                                      |
| 0.219066771                                                | 1.925666446                                 | 9.518159806                                      |
| 0.169700226                                                | 9.70189979                                  | 23.03943909                                      |
| 0.1729733                                                  | 3.82527671                                  | 16.08082409                                      |
| 0.140374904                                                | 7.580551944                                 | 24.11233886                                      |
| 0.214480017                                                | 1.947808385                                 | 10.23917137                                      |
| 0.199302808                                                | 2.769842606                                 | 11.33486239                                      |
| 0.10600904                                                 | 16.9696759                                  | 44.87539103                                      |
| 0.158499634                                                | 4.845203275                                 | 17.30805409                                      |
| 0.215765705                                                | 1.934273707                                 | 9.57644477                                       |
| 0.176044529                                                | 3.392063315                                 | 13.99502488                                      |
| 0.126942591                                                | 7.414739985                                 | 25.77725118                                      |
| 0.169896778                                                | 3.742995718                                 | 16.14196845                                      |
| 0.177084032                                                | 3.078609061                                 | 14.18456181                                      |
| 0.167872641                                                | 3.41316936                                  | 16.11279105                                      |
| 0.233002948                                                | 1.807170144                                 | 8.255872483                                      |
| 0.21345727                                                 | 1.990338479                                 | 10.26182708                                      |
| 0.212955118                                                | 1.986485521                                 | 9.274760383                                      |
| 0.226971486                                                | 1.588382713                                 | 9.843283582                                      |
| 0.168851548                                                | 5.372073731                                 | 17.25362647                                      |

|                                                              |                                                               |                                                               |
|--------------------------------------------------------------|---------------------------------------------------------------|---------------------------------------------------------------|
| log.sigma.4.0.mm.3D_gldm_LargeDependenceLowGrayLevelEmphasis | log.sigma.4.0.mm.3D_gldm_SmallDependenceHighGrayLevelEmphasis | log.sigma.4.0.mm.3D_gldm_LargeDependenceHighGrayLevelEmphasis |
| 0.067932141                                                  | 117.2071062                                                   | 2546.508695                                                   |
| 0.206295542                                                  | 103.3698263                                                   | 2116.259366                                                   |
| 0.092227686                                                  | 96.10820634                                                   | 2540.272422                                                   |
| 0.059513267                                                  | 154.017657                                                    | 1740.773292                                                   |
| 0.153082124                                                  | 71.0060454                                                    | 1806.299787                                                   |
| 0.090124292                                                  | 104.937314                                                    | 1595.231405                                                   |
| 0.454211273                                                  | 33.7534025                                                    | 9324.00854                                                    |
| 0.113879628                                                  | 84.72439003                                                   | 4478.281147                                                   |
| 0.35753108                                                   | 47.25556909                                                   | 3887.058189                                                   |
| 0.139258427                                                  | 56.94285565                                                   | 1746.549669                                                   |
| 0.277857254                                                  | 22.75012314                                                   | 1995.827121                                                   |
| 0.292140547                                                  | 44.22856229                                                   | 4652.757264                                                   |
| 0.069088832                                                  | 92.89502747                                                   | 3726.554871                                                   |
| 0.074046654                                                  | 145.5233268                                                   | 1876.63354                                                    |
| 0.246305917                                                  | 74.41424227                                                   | 1785.452698                                                   |
| 0.372701706                                                  | 45.30218497                                                   | 6116.816383                                                   |
| 0.436161262                                                  | 24.0340822                                                    | 1376.284258                                                   |
| 0.218855802                                                  | 105.3634716                                                   | 1606.026895                                                   |
| 0.420801689                                                  | 23.25117624                                                   | 2157.607861                                                   |
| 0.070971034                                                  | 87.09820722                                                   | 6923.199608                                                   |
| 0.292509702                                                  | 46.66265799                                                   | 1977.000962                                                   |
| 0.172080003                                                  | 73.92693996                                                   | 1841.5625                                                     |
| 0.360440752                                                  | 64.99828521                                                   | 1600.362007                                                   |
| 0.575636344                                                  | 23.17393321                                                   | 4048.651932                                                   |
| 0.126376692                                                  | 101.1553801                                                   | 8309.356678                                                   |
| 0.057533693                                                  | 133.7707597                                                   | 5489.614632                                                   |
| 0.086220566                                                  | 100.4911871                                                   | 2240.412675                                                   |
| 0.300009971                                                  | 37.77783951                                                   | 2097.636041                                                   |
| 0.326461658                                                  | 25.71090433                                                   | 1315.308219                                                   |
| 0.163190135                                                  | 52.80027814                                                   | 1963.550932                                                   |
| 0.199755897                                                  | 54.8678482                                                    | 2965.548266                                                   |
| 0.146047051                                                  | 109.0807056                                                   | 2144.606599                                                   |
| 0.170862187                                                  | 60.59802394                                                   | 3245.035546                                                   |
| 0.162260476                                                  | 54.30470245                                                   | 4511.988406                                                   |
| 0.15805987                                                   | 64.09952012                                                   | 3633.4549                                                     |
| 0.069695551                                                  | 107.5609741                                                   | 3902.757091                                                   |
| 0.046580903                                                  | 155.5280371                                                   | 3238.374339                                                   |
| 0.391122496                                                  | 51.71948387                                                   | 9783.036248                                                   |
| 0.281496628                                                  | 40.14495685                                                   | 1718.5875                                                     |
| 0.079598862                                                  | 102.902969                                                    | 16606.98592                                                   |
| 0.144495343                                                  | 77.32986796                                                   | 1815.033582                                                   |
| 0.386581035                                                  | 26.14397538                                                   | 6019.586037                                                   |
| 0.071141164                                                  | 122.2684162                                                   | 2832.343672                                                   |
| 0.135829771                                                  | 80.87396412                                                   | 1759.426761                                                   |
| 0.453573612                                                  | 32.36537224                                                   | 4866.232005                                                   |
| 0.148372087                                                  | 85.25922247                                                   | 2326.198251                                                   |
| 0.135496134                                                  | 62.4200926                                                    | 4965.605681                                                   |
| 0.282536786                                                  | 38.30259785                                                   | 1825.173116                                                   |
| 0.130339467                                                  | 66.76652186                                                   | 1328.104859                                                   |
| 0.050051937                                                  | 106.2142761                                                   | 2417.730088                                                   |
| 0.150053394                                                  | 84.56055645                                                   | 1510.139083                                                   |
| 0.065595013                                                  | 99.1159424                                                    | 2930.94219                                                    |
| 0.761124726                                                  | 18.85894817                                                   | 7344.475426                                                   |
| 0.075488974                                                  | 71.34153711                                                   | 4911.17905                                                    |
| 0.080192366                                                  | 134.2322233                                                   | 2349.813375                                                   |
| 0.178795279                                                  | 62.15418743                                                   | 1466.880952                                                   |
| 0.225050597                                                  | 52.20745591                                                   | 3725.640847                                                   |
| 0.058031657                                                  | 98.45659822                                                   | 2811.436381                                                   |
| 0.707128709                                                  | 65.59530478                                                   | 1362.418087                                                   |
| 0.279202231                                                  | 46.08631746                                                   | 15214.59965                                                   |
| 0.090024791                                                  | 82.05074604                                                   | 2720.620015                                                   |
| 0.05701766                                                   | 100.4610086                                                   | 3628.711156                                                   |
| 0.068055565                                                  | 112.8408522                                                   | 6242.66274                                                    |
| 0.075269238                                                  | 87.39006135                                                   | 3545.228053                                                   |
| 0.162216988                                                  | 51.8372925                                                    | 1521.60709                                                    |
| 0.053101483                                                  | 116.3522548                                                   | 3274.405145                                                   |
| 0.048499489                                                  | 104.594426                                                    | 2104.896552                                                   |
| 0.068030054                                                  | 104.9346941                                                   | 3669.293019                                                   |
| 0.2019107                                                    | 40.43182599                                                   | 4289.288093                                                   |
| 0.073176159                                                  | 62.41659297                                                   | 3249.84322                                                    |
| 0.142821544                                                  | 72.77583733                                                   | 1372.036585                                                   |
| 0.107976759                                                  | 81.34351394                                                   | 5108.082112                                                   |
| 0.272921063                                                  | 76.34404992                                                   | 1378.173034                                                   |
| 0.182582855                                                  | 57.25658967                                                   | 1191.212632                                                   |
| 0.217667553                                                  | 56.12449914                                                   | 6186.826151                                                   |
| 0.154673724                                                  | 34.01409802                                                   | 1725.305011                                                   |
| 0.139759527                                                  | 63.95499198                                                   | 3132.779538                                                   |
| 0.032543835                                                  | 185.1114284                                                   | 3109.869699                                                   |
| 0.073878051                                                  | 73.68264415                                                   | 2440.660076                                                   |
| 0.236586567                                                  | 38.83276986                                                   | 2736.497778                                                   |
| 0.068972028                                                  | 112.5897781                                                   | 2571.315789                                                   |
| 0.087256402                                                  | 70.0914383                                                    | 2491.173123                                                   |
| 0.348922678                                                  | 54.8252405                                                    | 3437.713409                                                   |
| 0.222590047                                                  | 39.47882619                                                   | 1942.032224                                                   |
| 0.208828927                                                  | 50.73940957                                                   | 4048.263352                                                   |
| 0.035857936                                                  | 94.22267616                                                   | 4578.120527                                                   |
| 0.123068078                                                  | 75.65254849                                                   | 2066.600917                                                   |
| 0.551505533                                                  | 39.05256158                                                   | 5471.338113                                                   |
| 0.143316142                                                  | 59.4692216                                                    | 3098.864785                                                   |
| 0.098554739                                                  | 82.73930245                                                   | 2064.926116                                                   |
| 0.062098795                                                  | 103.519844                                                    | 5286.54602                                                    |
| 0.324179137                                                  | 46.36431998                                                   | 3962.406398                                                   |
| 0.147507458                                                  | 44.33181008                                                   | 2685.113975                                                   |
| 0.161645214                                                  | 52.32093185                                                   | 2354.387115                                                   |
| 0.133833993                                                  | 43.12110023                                                   | 2697.130027                                                   |
| 0.048059746                                                  | 152.19905                                                     | 3015.385906                                                   |
| 0.113341653                                                  | 62.95478848                                                   | 2033.00571                                                    |
| 0.054541862                                                  | 100.7128665                                                   | 2887.591054                                                   |
| 0.097698635                                                  | 45.64014001                                                   | 2195.067164                                                   |
| 0.063475984                                                  | 92.74731576                                                   | 6135.841002                                                   |

|                                                              |                                               |                                                            |
|--------------------------------------------------------------|-----------------------------------------------|------------------------------------------------------------|
| log.sigma.4.0.mm.3D_gldm_SmallDependenceLowGrayLevelEmphasis | log.sigma.4.0.mm.3D_gldm_LowGrayLevelEmphasis | log.sigma.4.0.mm.3D_gldm_DistanceZoneVariabilityNormalized |
| 0.004323442                                                  | 0.008961708                                   | 0.902221278                                                |
| 0.005450147                                                  | 0.022323257                                   | 0.949719043                                                |
| 0.003269774                                                  | 0.011415029                                   | 0.899488156                                                |
| 0.010770624                                                  | 0.01693598                                    | 0.886134068                                                |
| 0.004229419                                                  | 0.015412429                                   | 0.854320278                                                |
| 0.007944489                                                  | 0.015550926                                   | 0.883781032                                                |
| 0.002122629                                                  | 0.010703455                                   | 0.952142926                                                |
| 0.001975661                                                  | 0.00700137                                    | 0.895644474                                                |
| 0.002353136                                                  | 0.013623164                                   | 0.963044535                                                |
| 0.004386471                                                  | 0.013181022                                   | 0.952029024                                                |
| 0.00334756                                                   | 0.015348178                                   | 0.949560646                                                |
| 0.002556144                                                  | 0.010918409                                   | 0.947472591                                                |
| 0.005184052                                                  | 0.010526177                                   | 0.863028711                                                |
| 0.004436862                                                  | 0.00985037                                    | 0.820498636                                                |
| 0.003550771                                                  | 0.01409595                                    | 0.924772989                                                |
| 0.002736895                                                  | 0.013326747                                   | 0.969238281                                                |
| 0.004552012                                                  | 0.027667722                                   | 0.97030378                                                 |
| 0.00696639                                                   | 0.023282439                                   | 0.832289698                                                |
| 0.003702544                                                  | 0.020354031                                   | 0.971434573                                                |
| 0.001176941                                                  | 0.004087811                                   | 0.95970443                                                 |
| 0.003345793                                                  | 0.020282546                                   | 0.945342398                                                |
| 0.004271026                                                  | 0.018890339                                   | 0.87331511                                                 |
| 0.004221595                                                  | 0.02833473                                    | 0.939756772                                                |
| 0.002817522                                                  | 0.019426382                                   | 0.967646295                                                |
| 0.002154289                                                  | 0.008278058                                   | 0.958255655                                                |
| 0.001356226                                                  | 0.003932547                                   | 0.929090293                                                |
| 0.002415126                                                  | 0.0078458                                     | 0.933145848                                                |
| 0.003710616                                                  | 0.019560081                                   | 0.936203945                                                |
| 0.00997107                                                   | 0.0229193                                     | 0.947406866                                                |
| 0.003303446                                                  | 0.011757178                                   | 0.983194484                                                |
| 0.002081751                                                  | 0.010266357                                   | 0.950940174                                                |
| 0.003967723                                                  | 0.016741449                                   | 0.884417919                                                |
| 0.002629043                                                  | 0.010114505                                   | 0.858963211                                                |
| 0.001909386                                                  | 0.008998047                                   | 0.969379537                                                |
| 0.002016313                                                  | 0.008219983                                   | 0.942707305                                                |
| 0.002629527                                                  | 0.00706568                                    | 0.79961903                                                 |
| 0.002635309                                                  | 0.006708697                                   | 0.677543195                                                |
| 0.00303619                                                   | 0.012726552                                   | 0.941503682                                                |
| 0.003647876                                                  | 0.022243493                                   | 0.84120983                                                 |
| 0.000506849                                                  | 0.002444233                                   | 0.939078405                                                |
| 0.002462385                                                  | 0.012383535                                   | 0.891573342                                                |
| 0.00155608                                                   | 0.01044973                                    | 0.90878124                                                 |
| 0.002431258                                                  | 0.00792302                                    | 0.92446223                                                 |
| 0.003257241                                                  | 0.01115955                                    | 0.932413814                                                |
| 0.003184604                                                  | 0.017868171                                   | 0.950032873                                                |
| 0.00237749                                                   | 0.01060334                                    | 0.917563943                                                |
| 0.00123034                                                   | 0.006037847                                   | 0.952671894                                                |
| 0.004548591                                                  | 0.022714259                                   | 1                                                          |
| 0.007178995                                                  | 0.017686093                                   | 0.925577523                                                |
| 0.005511561                                                  | 0.010585605                                   | 0.881078357                                                |
| 0.003544112                                                  | 0.011619371                                   | 0.976565795                                                |
| 0.002323205                                                  | 0.007421008                                   | 0.903202                                                   |
| 0.002177374                                                  | 0.016088787                                   | 0.939182651                                                |
| 0.001770678                                                  | 0.005213991                                   | 0.93048493                                                 |
| 0.004121574                                                  | 0.012305286                                   | 0.890613944                                                |
| 0.004734822                                                  | 0.016695489                                   | 0.957163408                                                |
| 0.002264001                                                  | 0.010652881                                   | 0.944489796                                                |
| 0.001887084                                                  | 0.005787291                                   | 0.926326959                                                |
| 0.00348939                                                   | 0.02437038                                    | 0.859340765                                                |
| 0.000920763                                                  | 0.00552735                                    | 0.9393566                                                  |
| 0.002933221                                                  | 0.007944073                                   | 0.946210955                                                |
| 0.00294394                                                   | 0.006854895                                   | 0.907876376                                                |
| 0.001246292                                                  | 0.004085791                                   | 0.843338067                                                |
| 0.002286474                                                  | 0.007389952                                   | 0.806086074                                                |
| 0.008365412                                                  | 0.020561543                                   | 0.975004006                                                |
| 0.001601141                                                  | 0.005598059                                   | 0.867150102                                                |
| 0.005580333                                                  | 0.010200949                                   | 0.822780581                                                |
| 0.00132282                                                   | 0.004867807                                   | 0.866292102                                                |
| 0.001501253                                                  | 0.008567555                                   | 0.95019648                                                 |
| 0.002446475                                                  | 0.007517137                                   | 0.908764503                                                |
| 0.006380098                                                  | 0.017964854                                   | 0.940649729                                                |
| 0.001563725                                                  | 0.006259191                                   | 0.922689043                                                |
| 0.004919686                                                  | 0.02159914                                    | 0.944694288                                                |
| 0.006190946                                                  | 0.018155242                                   | 0.994609204                                                |
| 0.001408628                                                  | 0.008270915                                   | 0.827836257                                                |
| 0.003218786                                                  | 0.014966496                                   | 0.9608                                                     |
| 0.00249578                                                   | 0.010616543                                   | 0.925374214                                                |
| 0.006506967                                                  | 0.009500119                                   | 0.866547055                                                |
| 0.003652369                                                  | 0.009269767                                   | 0.924486566                                                |
| 0.002559056                                                  | 0.013581222                                   | 0.949108841                                                |
| 0.003695187                                                  | 0.008415656                                   | 0.920960676                                                |
| 0.004076269                                                  | 0.010286482                                   | 0.974280894                                                |
| 0.003305473                                                  | 0.017506969                                   | 0.967922968                                                |
| 0.002773944                                                  | 0.014691292                                   | 0.953416368                                                |
| 0.002069033                                                  | 0.010007768                                   | 0.889433815                                                |
| 0.005689976                                                  | 0.008414867                                   | 0.863184401                                                |
| 0.003962571                                                  | 0.011719156                                   | 0.916824197                                                |
| 0.002416986                                                  | 0.015693497                                   | 0.973011188                                                |
| 0.003582648                                                  | 0.012040726                                   | 0.932887534                                                |
| 0.003246196                                                  | 0.009887596                                   | 0.931384649                                                |
| 0.002069873                                                  | 0.006987907                                   | 0.794631635                                                |
| 0.001827069                                                  | 0.013714483                                   | 0.944296707                                                |
| 0.002370002                                                  | 0.009835663                                   | 0.928358273                                                |
| 0.002611571                                                  | 0.011387626                                   | 0.942080642                                                |
| 0.001887692                                                  | 0.008149042                                   | 0.900530569                                                |
| 0.001911459                                                  | 0.005991843                                   | 0.808948911                                                |
| 0.003597786                                                  | 0.012336609                                   | 0.885354098                                                |
| 0.005627651                                                  | 0.01063631                                    | 0.839488                                                   |
| 0.007710418                                                  | 0.016768776                                   | 0.931903114                                                |
| 0.001329535                                                  | 0.004280274                                   | 0.895353556                                                |

| log.sigma.4.0.mm.3D_gldzm_LowIntensityEmphasis | log.sigma.4.0.mm.3D_gldzm_LargeDistanceEmphasis | log.sigma.4.0.mm.3D_gldzm_HighIntensitySmallDistanceEmphasis |
|------------------------------------------------|-------------------------------------------------|--------------------------------------------------------------|
| 0.012069045                                    | 1.154639175                                     | 338.8556701                                                  |
| 0.018991794                                    | 1.077419355                                     | 277.3129032                                                  |
| 0.011171756                                    | 1.159217877                                     | 288.400838                                                   |
| 0.023006974                                    | 1.181818182                                     | 348.9166667                                                  |
| 0.014123426                                    | 1.237288136                                     | 219.757533                                                   |
| 0.019374665                                    | 1.185840708                                     | 275.8318584                                                  |
| 0.01318989                                     | 1.073590814                                     | 207.6417015                                                  |
| 0.007477805                                    | 1.165683646                                     | 316.7919571                                                  |
| 0.011120406                                    | 1.056497175                                     | 226.9981168                                                  |
| 0.015420699                                    | 1.073770492                                     | 210.7366803                                                  |
| 0.019165369                                    | 1.077669903                                     | 136.8511327                                                  |
| 0.012655984                                    | 1.080976864                                     | 224.0215296                                                  |
| 0.015145319                                    | 1.221864952                                     | 285.642283                                                   |
| 0.010253658                                    | 1.299065421                                     | 345.4719626                                                  |
| 0.011341019                                    | 1.117437722                                     | 238.9430605                                                  |
| 0.012796753                                    | 1.046875                                        | 211.0644531                                                  |
| 0.026333342                                    | 1.045226131                                     | 127.8555276                                                  |
| 0.021612433                                    | 1.277173913                                     | 283.4442935                                                  |
| 0.02123937                                     | 1.043478261                                     | 137.9673913                                                  |
| 0.00514496                                     | 1.061712846                                     | 381.0126994                                                  |
| 0.015100846                                    | 1.084358524                                     | 196.4112478                                                  |
| 0.016805888                                    | 1.203883495                                     | 220.9381068                                                  |
| 0.016194215                                    | 1.093264249                                     | 217.5595855                                                  |
| 0.019126375                                    | 1.049342105                                     | 159.4239309                                                  |
| 0.009290918                                    | 1.063981043                                     | 344.5503555                                                  |
| 0.00471995                                     | 1.110429448                                     | 483.1883436                                                  |
| 0.007957978                                    | 1.103878116                                     | 325.2624654                                                  |
| 0.019115962                                    | 1.098958333                                     | 174.718316                                                   |
| 0.042388928                                    | 1.081081081                                     | 129.5945946                                                  |
| 0.01276726                                     | 1.025423729                                     | 213.8908898                                                  |
| 0.008855716                                    | 1.075489282                                     | 241.7993942                                                  |
| 0.013938304                                    | 1.184750733                                     | 296.1341642                                                  |
| 0.010925918                                    | 1.229041916                                     | 245.7020958                                                  |
| 0.009172101                                    | 1.046656299                                     | 240.2391135                                                  |
| 0.008534968                                    | 1.088552916                                     | 275.9868611                                                  |
| 0.008180909                                    | 1.338842975                                     | 326.3973829                                                  |
| 0.007583934                                    | 1.612307692                                     | 405.385812                                                   |
| 0.014177709                                    | 1.090472927                                     | 237.9705278                                                  |
| 0.020909808                                    | 1.260869565                                     | 161.0481366                                                  |
| 0.002752748                                    | 1.09434968                                      | 572.2869136                                                  |
| 0.010360954                                    | 1.172566372                                     | 270.5049779                                                  |
| 0.012574                                       | 1.143712575                                     | 193.4314371                                                  |
| 0.0078161                                      | 1.117943548                                     | 357.6658266                                                  |
| 0.010453717                                    | 1.105058366                                     | 265.8273346                                                  |
| 0.0195011                                      | 1.076923077                                     | 188.9102564                                                  |
| 0.008762173                                    | 1.129220023                                     | 281.6702561                                                  |
| 0.00601804                                     | 1.072756669                                     | 306.9553355                                                  |
| 0.021805089                                    | 1                                               | 161.5602837                                                  |
| 0.020968391                                    | 1.116129032                                     | 215.3725806                                                  |
| 0.015136098                                    | 1.19047619                                      | 302.6653439                                                  |
| 0.0107407                                      | 1.035573123                                     | 261.7282609                                                  |
| 0.00863708                                     | 1.153                                           | 330.17175                                                    |
| 0.019282218                                    | 1.094182825                                     | 155.9272853                                                  |
| 0.0077257                                      | 1.108173077                                     | 316.2313702                                                  |
| 0.01200683                                     | 1.174193548                                     | 344.041129                                                   |
| 0.015129932                                    | 1.065693431                                     | 223.8321168                                                  |
| 0.010080526                                    | 1.085714286                                     | 235.4185714                                                  |
| 0.00616499                                     | 1.114911081                                     | 334.8026676                                                  |
| 0.015236425                                    | 1.228373702                                     | 208.3892734                                                  |
| 0.006205697                                    | 1.093904448                                     | 307.1052993                                                  |
| 0.009590371                                    | 1.082978723                                     | 274.3079787                                                  |
| 0.009224056                                    | 1.145214521                                     | 328.0225523                                                  |
| 0.004577185                                    | 1.257011141                                     | 408.0822128                                                  |
| 0.008397388                                    | 1.326378539                                     | 307.4944113                                                  |
| 0.028395176                                    | 1.037974684                                     | 179.4409283                                                  |
| 0.005837298                                    | 1.214630225                                     | 366.9933682                                                  |
| 0.014788115                                    | 1.294797688                                     | 296.566474                                                   |
| 0.004981548                                    | 1.216133005                                     | 380.348984                                                   |
| 0.008580755                                    | 1.076664425                                     | 227.9583053                                                  |
| 0.009505779                                    | 1.14374034                                      | 243.8593509                                                  |
| 0.018323695                                    | 1.091836735                                     | 218.8418367                                                  |
| 0.006301483                                    | 1.120833333                                     | 330.8418403                                                  |
| 0.017254812                                    | 1.085388994                                     | 232.3164137                                                  |
| 0.019252536                                    | 1.008108108                                     | 176.4601351                                                  |
| 0.00778082                                     | 1.301754386                                     | 293.0390838                                                  |
| 0.017421408                                    | 1.06                                            | 156.722                                                      |
| 0.011761978                                    | 1.116459627                                     | 256.384705                                                   |
| 0.014661599                                    | 1.215686275                                     | 471.8431373                                                  |
| 0.012413789                                    | 1.11790393                                      | 253.3629913                                                  |
| 0.014354696                                    | 1.078384798                                     | 196.6425178                                                  |
| 0.010631333                                    | 1.123655914                                     | 336.7719534                                                  |
| 0.012806767                                    | 1.039087948                                     | 230.8697068                                                  |
| 0.013284698                                    | 1.048913043                                     | 204.3250679                                                  |
| 0.015223462                                    | 1.071583514                                     | 188.5759219                                                  |
| 0.009915485                                    | 1.176197836                                     | 245.4656105                                                  |
| 0.018384398                                    | 1.221590909                                     | 325.7627841                                                  |
| 0.012897061                                    | 1.130434783                                     | 245.7789855                                                  |
| 0.01239712                                     | 1.041044776                                     | 220.4306592                                                  |
| 0.016410865                                    | 1.104294479                                     | 234.4125767                                                  |
| 0.010602765                                    | 1.106719368                                     | 265.7653162                                                  |
| 0.009853029                                    | 1.348547718                                     | 382.1275934                                                  |
| 0.009962487                                    | 1.086021505                                     | 240.561828                                                   |
| 0.011538733                                    | 1.111615245                                     | 209.7883394                                                  |
| 0.011821534                                    | 1.089552239                                     | 226.3403518                                                  |
| 0.009106876                                    | 1.157469717                                     | 211.4017497                                                  |
| 0.006021234                                    | 1.320902846                                     | 395.2944063                                                  |
| 0.013620772                                    | 1.183150183                                     | 226.0418193                                                  |
| 0.016412323                                    | 1.264                                           | 290.812                                                      |
| 0.029302298                                    | 1.105882353                                     | 181.9058824                                                  |
| 0.005027613                                    | 1.166174298                                     | 346.5362814                                                  |

| log.sigma.4.0.mm.3D_gldzm_LowIntensityLargeDistanceEmphasis | log.sigma.4.0.mm.3D_gldzm_HighIntensityEmphasis | log.sigma.4.0.mm.3D_gldzm_DistanceZoneVariability | log.sigma.4.0.mm.3D_gldzm_ZonePercentage |
|-------------------------------------------------------------|-------------------------------------------------|---------------------------------------------------|------------------------------------------|
| 0.014537719                                                 | 351.814433                                      | 525.0927835                                       | 0.403047091                              |
| 0.019673865                                                 | 280.3612903                                     | 147.2064516                                       | 0.446685879                              |
| 0.01189441                                                  | 298                                             | 322.0167598                                       | 0.401345291                              |
| 0.02408657                                                  | 358.3939394                                     | 146.2121212                                       | 0.51242236                               |
| 0.01614422                                                  | 228.8775895                                     | 453.6440678                                       | 0.376328845                              |
| 0.020596685                                                 | 285.0707965                                     | 99.86725664                                       | 0.466942149                              |
| 0.013733834                                                 | 211.2719207                                     | 1824.305846                                       | 0.18180093                               |
| 0.00972475                                                  | 328.0841823                                     | 1670.376944                                       | 0.307350033                              |
| 0.011744581                                                 | 228.6873823                                     | 1022.753296                                       | 0.249178789                              |
| 0.015941117                                                 | 214.1147541                                     | 232.295082                                        | 0.323178808                              |
| 0.019791495                                                 | 139.4724919                                     | 293.4142395                                       | 0.198586118                              |
| 0.013267019                                                 | 227.9344473                                     | 737.1336761                                       | 0.22835339                               |
| 0.016405261                                                 | 297.4951768                                     | 268.4019293                                       | 0.383477189                              |
| 0.026838283                                                 | 353.7943925                                     | 263.3800623                                       | 0.498447205                              |
| 0.013952625                                                 | 242.8932384                                     | 519.7224199                                       | 0.356825397                              |
| 0.013097629                                                 | 213.196733                                      | 1364.6875                                         | 0.244359597                              |
| 0.027027309                                                 | 128.6582915                                     | 193.0904523                                       | 0.225368063                              |
| 0.027613315                                                 | 289.8967391                                     | 153.1413043                                       | 0.449877751                              |
| 0.021862365                                                 | 139.057971                                      | 201.0869565                                       | 0.189213894                              |
| 0.005304799                                                 | 387.9047019                                     | 2286.015953                                       | 0.259392355                              |
| 0.016060341                                                 | 198.5254833                                     | 537.8998243                                       | 0.273820982                              |
| 0.019348852                                                 | 227.0582524                                     | 179.9029126                                       | 0.415322581                              |
| 0.017429103                                                 | 219.5025907                                     | 181.373057                                        | 0.345878136                              |
| 0.025141196                                                 | 160.1529605                                     | 588.3289474                                       | 0.169029747                              |
| 0.009935137                                                 | 348.014218                                      | 404.3838863                                       | 0.343648208                              |
| 0.00503385                                                  | 495.8932515                                     | 757.208589                                        | 0.31885759                               |
| 0.008698159                                                 | 330.9238227                                     | 673.7313019                                       | 0.360279441                              |
| 0.021805905                                                 | 176.9878472                                     | 539.2534722                                       | 0.255659121                              |
| 0.047456496                                                 | 129.9189189                                     | 35.05405405                                       | 0.253424658                              |
| 0.012950176                                                 | 214.815678                                      | 464.0677966                                       | 0.293167702                              |
| 0.00967853                                                  | 244.9804287                                     | 1020.358807                                       | 0.267647792                              |
| 0.015485675                                                 | 302.941349                                      | 301.5865103                                       | 0.432741117                              |
| 0.012976228                                                 | 256.8577844                                     | 573.7874251                                       | 0.28608137                               |
| 0.009390266                                                 | 243.0419907                                     | 623.311042                                        | 0.266252588                              |
| 0.009567779                                                 | 279.737941                                      | 1309.420446                                       | 0.270601987                              |
| 0.017140532                                                 | 341.362259                                      | 580.523416                                        | 0.374419804                              |
| 0.016643818                                                 | 432.4076923                                     | 440.4030769                                       | 0.42989418                               |
| 0.015027447                                                 | 241.5935572                                     | 1373.653873                                       | 0.250644219                              |
| 0.045634927                                                 | 165.1242236                                     | 135.4347826                                       | 0.2875                                   |
| 0.002987289                                                 | 584.8981876                                     | 1761.711087                                       | 0.19858156                               |
| 0.012647478                                                 | 277.5154867                                     | 402.9911504                                       | 0.337313433                              |
| 0.014350758                                                 | 198.9760479                                     | 758.8323353                                       | 0.147214386                              |
| 0.010425177                                                 | 361.46875                                       | 917.0665323                                       | 0.41025641                               |
| 0.012746151                                                 | 271.4202335                                     | 479.2607004                                       | 0.361971831                              |
| 0.020958879                                                 | 190.3717949                                     | 296.4102564                                       | 0.200514139                              |
| 0.010019606                                                 | 287.145518                                      | 788.1874272                                       | 0.357767597                              |
| 0.006479815                                                 | 311.1139854                                     | 1178.455133                                       | 0.231171744                              |
| 0.021805089                                                 | 161.5602837                                     | 141                                               | 0.287169043                              |
| 0.02322227                                                  | 217.8064516                                     | 143.4645161                                       | 0.396419437                              |
| 0.016368866                                                 | 311.9153439                                     | 166.5238095                                       | 0.418141593                              |
| 0.01314797                                                  | 262.3241107                                     | 494.1422925                                       | 0.393162393                              |
| 0.00964175                                                  | 340.896                                         | 903.202                                           | 0.359066427                              |
| 0.021579585                                                 | 158.6565097                                     | 1017.134811                                       | 0.135782347                              |
| 0.0081814                                                   | 323.3798077                                     | 387.0817308                                       | 0.253349574                              |
| 0.013554819                                                 | 352.1483871                                     | 276.0903226                                       | 0.482115086                              |
| 0.015991602                                                 | 225.5328467                                     | 393.3941606                                       | 0.349489796                              |
| 0.016054077                                                 | 238.2514286                                     | 991.7142857                                       | 0.261519303                              |
| 0.006662751                                                 | 342.3406293                                     | 677.1450068                                       | 0.353652637                              |
| 0.020478689                                                 | 213.3460208                                     | 248.349481                                        | 0.378768021                              |
| 0.006821565                                                 | 313.0801757                                     | 1710.568369                                       | 0.167171578                              |
| 0.010247787                                                 | 278.2893617                                     | 444.7191489                                       | 0.35364936                               |
| 0.009889838                                                 | 339.7832783                                     | 825.259626                                        | 0.368762677                              |
| 0.005714341                                                 | 430.1552055                                     | 2195.20899                                        | 0.316128249                              |
| 0.011460023                                                 | 326.5350224                                     | 540.8837556                                       | 0.320133588                              |
| 0.028743969                                                 | 180.535865                                      | 231.0759494                                       | 0.350073855                              |
| 0.007059535                                                 | 382.5836013                                     | 1078.734727                                       | 0.363636364                              |
| 0.018120775                                                 | 304.6473988                                     | 142.3410405                                       | 0.426108374                              |
| 0.006164239                                                 | 396.8799261                                     | 1406.858374                                       | 0.319370698                              |
| 0.009206898                                                 | 231.8298588                                     | 1412.942165                                       | 0.198055408                              |
| 0.010213102                                                 | 252.3632148                                     | 587.9706337                                       | 0.304613936                              |
| 0.01950943                                                  | 221.5204082                                     | 184.3673469                                       | 0.398373984                              |
| 0.009729685                                                 | 336.6569444                                     | 1328.672222                                       | 0.289098575                              |
| 0.018479225                                                 | 234.5806452                                     | 497.8538899                                       | 0.394756554                              |
| 0.019352636                                                 | 176.6243243                                     | 368.0054054                                       | 0.389473684                              |
| 0.018206771                                                 | 304.9017544                                     | 707.8                                             | 0.209353575                              |
| 0.017992063                                                 | 158.36                                          | 240.2                                             | 0.272331155                              |
| 0.012434344                                                 | 262.7934783                                     | 595.9409938                                       | 0.291534631                              |
| 0.015967878                                                 | 482.6470588                                     | 132.5816993                                       | 0.473684211                              |
| 0.013256444                                                 | 259.2860262                                     | 423.4148472                                       | 0.348288973                              |
| 0.014974582                                                 | 199.4608076                                     | 399.5748219                                       | 0.233888889                              |
| 0.012890477                                                 | 346.7706093                                     | 513.8960573                                       | 0.396870555                              |
| 0.013206818                                                 | 232.6775244                                     | 299.1042345                                       | 0.371670702                              |
| 0.013608753                                                 | 206.4375                                        | 712.3913043                                       | 0.322524102                              |
| 0.016304061                                                 | 190.2255965                                     | 439.5249458                                       | 0.24352879                               |
| 0.011065762                                                 | 254.9258114                                     | 575.4636785                                       | 0.238305709                              |
| 0.019282498                                                 | 340.7159091                                     | 151.9204545                                       | 0.331450094                              |
| 0.014228893                                                 | 250.8364389                                     | 442.826087                                        | 0.369266055                              |
| 0.012778408                                                 | 222.1032338                                     | 782.300995                                        | 0.209593326                              |
| 0.017161904                                                 | 238.5582822                                     | 456.1820041                                       | 0.287477954                              |
| 0.011370676                                                 | 270.7233202                                     | 471.2806324                                       | 0.370153621                              |
| 0.011371421                                                 | 407.6431535                                     | 191.5062241                                       | 0.299751244                              |
| 0.016463104                                                 | 243.2473118                                     | 526.9175627                                       | 0.220379147                              |
| 0.012489126                                                 | 214.2059891                                     | 1023.050817                                       | 0.244834481                              |
| 0.012668631                                                 | 230.0863539                                     | 883.6716418                                       | 0.272199652                              |
| 0.010583823                                                 | 219.1480485                                     | 669.0942127                                       | 0.224674932                              |
| 0.007541357                                                 | 419.9656526                                     | 824.3189401                                       | 0.427432886                              |
| 0.015244186                                                 | 233.4529915                                     | 725.1050061                                       | 0.334013051                              |
| 0.018609612                                                 | 302.152                                         | 104.936                                           | 0.399361022                              |
| 0.030253279                                                 | 184.9411765                                     | 79.21176471                                       | 0.317164179                              |
| 0.005767295                                                 | 359.6166913                                     | 2424.61743                                        | 0.306890299                              |

| log.sigma.4.0.mm.3D_gldzm_IntensityVariabilityNormalized | log.sigma.4.0.mm.3D_gldzm_LowIntensitySmallDistanceEmphasis | log.sigma.4.0.mm.3D_gldzm_IntensityVariability |
|----------------------------------------------------------|-------------------------------------------------------------|------------------------------------------------|
| 0.039814126                                              | 0.011451876                                                 | 23.17182131                                    |
| 0.042913632                                              | 0.018821276                                                 | 6.651612903                                    |
| 0.046658968                                              | 0.010991093                                                 | 16.70391061                                    |
| 0.040440771                                              | 0.022737075                                                 | 6.672727273                                    |
| 0.049088349                                              | 0.013618227                                                 | 26.06591337                                    |
| 0.051296108                                              | 0.019069159                                                 | 5.796460177                                    |
| 0.050414377                                              | 0.013053904                                                 | 96.59394572                                    |
| 0.045245779                                              | 0.006916069                                                 | 84.38337802                                    |
| 0.054353262                                              | 0.010964362                                                 | 57.72316384                                    |
| 0.052405267                                              | 0.015290595                                                 | 12.78688525                                    |
| 0.068086845                                              | 0.019008838                                                 | 21.03883495                                    |
| 0.052233332                                              | 0.012503225                                                 | 40.63753213                                    |
| 0.047238966                                              | 0.014830333                                                 | 14.69131833                                    |
| 0.045253831                                              | 0.006107502                                                 | 14.52647975                                    |
| 0.051880042                                              | 0.010688117                                                 | 29.15658363                                    |
| 0.049311362                                              | 0.012721534                                                 | 69.43039773                                    |
| 0.066690235                                              | 0.02615985                                                  | 13.27135678                                    |
| 0.045545841                                              | 0.020112213                                                 | 8.380434783                                    |
| 0.069056454                                              | 0.021083621                                                 | 14.29468599                                    |
| 0.044631898                                              | 0.005105                                                    | 106.3131822                                    |
| 0.051942637                                              | 0.014860972                                                 | 29.55536028                                    |
| 0.052785371                                              | 0.016170147                                                 | 10.87378641                                    |
| 0.054954495                                              | 0.015885493                                                 | 10.60621762                                    |
| 0.06760193                                               | 0.017622669                                                 | 41.10197368                                    |
| 0.042990948                                              | 0.009129863                                                 | 18.14218009                                    |
| 0.045344575                                              | 0.004641475                                                 | 36.95582822                                    |
| 0.045652658                                              | 0.007772932                                                 | 32.96121884                                    |
| 0.057159047                                              | 0.018443476                                                 | 32.92361111                                    |
| 0.07669832                                               | 0.041122036                                                 | 2.837837838                                    |
| 0.057454754                                              | 0.012721531                                                 | 27.11864407                                    |
| 0.05319331                                               | 0.008650012                                                 | 57.07642125                                    |
| 0.048597793                                              | 0.013551461                                                 | 16.57184751                                    |
| 0.050364839                                              | 0.010413341                                                 | 33.64371257                                    |
| 0.057025171                                              | 0.00911756                                                  | 36.66718507                                    |
| 0.049510164                                              | 0.008276765                                                 | 68.76961843                                    |
| 0.049157996                                              | 0.005941003                                                 | 35.68870523                                    |
| 0.043081657                                              | 0.005425801                                                 | 28.00307692                                    |
| 0.048803461                                              | 0.013965275                                                 | 71.20424949                                    |
| 0.064696578                                              | 0.014728528                                                 | 10.41614907                                    |
| 0.052656494                                              | 0.002694113                                                 | 98.78358209                                    |
| 0.048838985                                              | 0.009789323                                                 | 22.07522124                                    |
| 0.064772491                                              | 0.012129811                                                 | 54.08502994                                    |
| 0.044692215                                              | 0.007163831                                                 | 44.33467742                                    |
| 0.050848612                                              | 0.009880608                                                 | 26.13618677                                    |
| 0.059377055                                              | 0.019136655                                                 | 18.52564103                                    |
| 0.048082279                                              | 0.008447815                                                 | 41.30267753                                    |
| 0.054785452                                              | 0.005902597                                                 | 67.76960388                                    |
| 0.065238167                                              | 0.021805089                                                 | 9.19858156                                     |
| 0.050655567                                              | 0.020404922                                                 | 7.851612903                                    |
| 0.046723216                                              | 0.014827906                                                 | 8.830687831                                    |
| 0.051711478                                              | 0.010138883                                                 | 26.16600791                                    |
| 0.04662                                                  | 0.008385912                                                 | 46.62                                          |
| 0.062190881                                              | 0.018707876                                                 | 67.35272392                                    |
| 0.057345599                                              | 0.007611775                                                 | 23.85576923                                    |
| 0.041789802                                              | 0.011619833                                                 | 12.95483871                                    |
| 0.04947283                                               | 0.014914514                                                 | 20.33333333                                    |
| 0.053745125                                              | 0.008587138                                                 | 56.43238095                                    |
| 0.051929314                                              | 0.006040549                                                 | 37.96032832                                    |
| 0.055471079                                              | 0.013925859                                                 | 16.03114187                                    |
| 0.053965859                                              | 0.006051729                                                 | 98.27182867                                    |
| 0.049425079                                              | 0.009426017                                                 | 23.22978723                                    |
| 0.043192328                                              | 0.00905761                                                  | 39.26182618                                    |
| 0.044363392                                              | 0.004292896                                                 | 115.4779101                                    |
| 0.046635024                                              | 0.007631729                                                 | 31.29210134                                    |
| 0.054033364                                              | 0.028307978                                                 | 12.80590717                                    |
| 0.045097497                                              | 0.005531738                                                 | 56.10128617                                    |
| 0.050285676                                              | 0.01395495                                                  | 8.699421965                                    |
| 0.048677928                                              | 0.004685876                                                 | 79.05295567                                    |
| 0.058456409                                              | 0.00842422                                                  | 86.92468056                                    |
| 0.051100191                                              | 0.009328948                                                 | 33.0618238                                     |
| 0.052374011                                              | 0.018027262                                                 | 10.26530612                                    |
| 0.047660108                                              | 0.005444433                                                 | 68.63055556                                    |
| 0.046509367                                              | 0.016948709                                                 | 24.51043643                                    |
| 0.054740687                                              | 0.019227511                                                 | 20.25405405                                    |
| 0.052284122                                              | 0.005577722                                                 | 44.70292398                                    |
| 0.064032                                                 | 0.017278745                                                 | 16.008                                         |
| 0.050837159                                              | 0.011593886                                                 | 32.73913043                                    |
| 0.046776881                                              | 0.014335029                                                 | 7.156862745                                    |
| 0.047853779                                              | 0.012203126                                                 | 21.91703057                                    |
| 0.059156741                                              | 0.014199724                                                 | 24.90498812                                    |
| 0.040576303                                              | 0.010066548                                                 | 22.64157706                                    |
| 0.052976689                                              | 0.012706754                                                 | 16.26384365                                    |
| 0.054314597                                              | 0.013203684                                                 | 39.97554348                                    |
| 0.06386663                                               | 0.014953312                                                 | 29.44251627                                    |
| 0.052084403                                              | 0.009627916                                                 | 33.69860896                                    |
| 0.047262397                                              | 0.018159873                                                 | 8.318181818                                    |
| 0.052222779                                              | 0.012564103                                                 | 25.22360248                                    |
| 0.052675058                                              | 0.012301798                                                 | 42.35074627                                    |
| 0.051409119                                              | 0.016223105                                                 | 25.1390593                                     |
| 0.047571435                                              | 0.010410788                                                 | 24.07114625                                    |
| 0.048019146                                              | 0.009473431                                                 | 11.57261411                                    |
| 0.058214823                                              | 0.008337333                                                 | 32.48387097                                    |
| 0.056653305                                              | 0.011301135                                                 | 62.43194192                                    |
| 0.051481854                                              | 0.01160976                                                  | 48.28997868                                    |
| 0.065198923                                              | 0.008737639                                                 | 48.44279946                                    |
| 0.039669248                                              | 0.005641203                                                 | 40.42296369                                    |
| 0.049694302                                              | 0.013214919                                                 | 40.6996337                                     |
| 0.054208                                                 | 0.015863001                                                 | 6.776                                          |
| 0.063252595                                              | 0.029064553                                                 | 5.376470588                                    |
| 0.047100718                                              | 0.004842693                                                 | 127.5487445                                    |

| log.sigma.4.0.mm.3D_gldzm_HighIntensityLargeDistanceEmphasis | log.sigma.4.0.mm.3D_gldzm_SmallDistanceEmphasis | log.sigma.4.0.mm.3D_glcm_SumVariance | log.sigma.4.0.mm.3D_glcm_Homogeneity1 |
|--------------------------------------------------------------|-------------------------------------------------|--------------------------------------|---------------------------------------|
| 403.6494845                                                  | 0.961340206                                     | 830.8493183                          | 0.302079452                           |
| 292.5548387                                                  | 0.980645161                                     | 696.253258                           | 0.285048611                           |
| 336.396648                                                   | 0.960195531                                     | 787.0614255                          | 0.291432606                           |
| 396.3030303                                                  | 0.954545455                                     | 819.6534406                          | 0.267098707                           |
| 265.3578154                                                  | 0.940677966                                     | 527.8517417                          | 0.319364052                           |
| 322.0265487                                                  | 0.953539823                                     | 692.1576053                          | 0.298470571                           |
| 225.7927975                                                  | 0.981602296                                     | 449.8641197                          | 0.485054249                           |
| 373.2530831                                                  | 0.958579088                                     | 720.2359376                          | 0.358628161                           |
| 235.4444444                                                  | 0.985875706                                     | 387.2151154                          | 0.413694132                           |
| 227.6270492                                                  | 0.981557377                                     | 436.9302459                          | 0.355747509                           |
| 149.9579288                                                  | 0.980582524                                     | 282.7626226                          | 0.438710193                           |
| 243.5861183                                                  | 0.979755784                                     | 442.2796358                          | 0.433022676                           |
| 344.9067524                                                  | 0.944533762                                     | 884.9354782                          | 0.30335361                            |
| 387.0841121                                                  | 0.925233645                                     | 807.5410341                          | 0.268168119                           |
| 258.6939502                                                  | 0.970640569                                     | 418.6740849                          | 0.349324578                           |
| 221.7258523                                                  | 0.98828125                                      | 482.8075786                          | 0.430252046                           |
| 131.8693467                                                  | 0.988693467                                     | 224.9015605                          | 0.401892881                           |
| 315.7065217                                                  | 0.930706522                                     | 594.3683649                          | 0.284204927                           |
| 143.4202899                                                  | 0.989130435                                     | 232.9786583                          | 0.439156157                           |
| 415.472712                                                   | 0.984571788                                     | 1055.367251                          | 0.379959638                           |
| 206.9824253                                                  | 0.978910369                                     | 439.345119                           | 0.351361229                           |
| 251.538835                                                   | 0.949029126                                     | 529.1432227                          | 0.317636072                           |
| 227.2746114                                                  | 0.976683938                                     | 418.1480155                          | 0.340142875                           |
| 163.0690789                                                  | 0.987664474                                     | 259.5800056                          | 0.490682169                           |
| 361.8696682                                                  | 0.984004739                                     | 856.2393411                          | 0.370225923                           |
| 546.7128834                                                  | 0.972392638                                     | 1207.529078                          | 0.355413594                           |
| 353.5692521                                                  | 0.974030471                                     | 705.4493862                          | 0.316880577                           |
| 186.0659722                                                  | 0.975260417                                     | 320.0368335                          | 0.390075956                           |
| 131.2162162                                                  | 0.97972973                                      | 235.5234553                          | 0.43178062                            |
| 218.5148305                                                  | 0.993644068                                     | 455.3278654                          | 0.365531896                           |
| 257.7045666                                                  | 0.981127679                                     | 509.0418299                          | 0.373996803                           |
| 330.170088                                                   | 0.953812317                                     | 738.7147473                          | 0.28783019                            |
| 301.4805389                                                  | 0.942739521                                     | 561.4931564                          | 0.374780209                           |
| 254.2534992                                                  | 0.988335925                                     | 573.5977606                          | 0.408589199                           |
| 294.7422606                                                  | 0.977861771                                     | 581.9672829                          | 0.381603784                           |
| 401.2217631                                                  | 0.915289256                                     | 911.4021788                          | 0.316166929                           |
| 540.6046154                                                  | 0.848632479                                     | 1124.685557                          | 0.275853977                           |
| 256.0856751                                                  | 0.977381768                                     | 527.4289984                          | 0.454448449                           |
| 181.4285714                                                  | 0.934782609                                     | 355.6081964                          | 0.355741723                           |
| 635.3423826                                                  | 0.97641258                                      | 1553.772897                          | 0.454026392                           |
| 305.5575221                                                  | 0.956858407                                     | 555.0020812                          | 0.329764703                           |
| 221.154491                                                   | 0.964071856                                     | 389.2182315                          | 0.498157232                           |
| 376.6804435                                                  | 0.970514113                                     | 910.7360687                          | 0.294808136                           |
| 293.7918288                                                  | 0.973735409                                     | 565.6843344                          | 0.321571168                           |
| 196.2179487                                                  | 0.980769231                                     | 340.8889133                          | 0.459099431                           |
| 309.0465658                                                  | 0.967694994                                     | 626.4719279                          | 0.330468768                           |
| 327.7485853                                                  | 0.981810833                                     | 680.4834826                          | 0.410126001                           |
| 161.5602837                                                  | 1                                               | 310.0944583                          | 0.37670162                            |
| 227.5419355                                                  | 0.970967742                                     | 450.8143133                          | 0.321432926                           |
| 348.9153439                                                  | 0.952380952                                     | 868.9607501                          | 0.294156272                           |
| 264.7075099                                                  | 0.991106719                                     | 465.556572                           | 0.342884757                           |
| 383.793                                                      | 0.96175                                         | 867.2108741                          | 0.327240778                           |
| 169.5734072                                                  | 0.976454294                                     | 285.548856                           | 0.539779329                           |
| 351.9735577                                                  | 0.972956731                                     | 872.5064446                          | 0.386753302                           |
| 384.5774194                                                  | 0.956451613                                     | 919.9175593                          | 0.270402416                           |
| 232.3357664                                                  | 0.983576642                                     | 462.5462726                          | 0.32178687                            |
| 249.5828571                                                  | 0.978571429                                     | 472.0241939                          | 0.397490319                           |
| 372.4924761                                                  | 0.97127223                                      | 860.9323675                          | 0.319167488                           |
| 233.1730104                                                  | 0.942906574                                     | 417.0866333                          | 0.323506127                           |
| 336.9796815                                                  | 0.976523888                                     | 725.4849632                          | 0.493733425                           |
| 294.2148936                                                  | 0.979255319                                     | 661.0451739                          | 0.344236845                           |
| 386.8261826                                                  | 0.96369637                                      | 935.0353728                          | 0.318763964                           |
| 518.4471763                                                  | 0.935747215                                     | 1124.37227                           | 0.353281767                           |
| 402.6974665                                                  | 0.918405365                                     | 815.6900609                          | 0.336367198                           |
| 184.9156118                                                  | 0.990506329                                     | 385.3100191                          | 0.34609881                            |
| 444.9445338                                                  | 0.946342444                                     | 1004.448952                          | 0.311122357                           |
| 336.9710983                                                  | 0.926300578                                     | 758.9147297                          | 0.29629067                            |
| 463.0036946                                                  | 0.945966749                                     | 937.2676392                          | 0.345280908                           |
| 247.3160726                                                  | 0.980833894                                     | 514.0346302                          | 0.423387067                           |
| 286.3786708                                                  | 0.964064915                                     | 709.3416051                          | 0.349405397                           |
| 232.2346939                                                  | 0.977040816                                     | 430.1285019                          | 0.314069496                           |
| 359.9173611                                                  | 0.969791667                                     | 784.870399                           | 0.364958602                           |
| 243.6375712                                                  | 0.978652751                                     | 462.1240896                          | 0.308843461                           |
| 177.2810811                                                  | 0.997972973                                     | 358.1920349                          | 0.349710917                           |
| 352.7578947                                                  | 0.928460039                                     | 575.9880117                          | 0.431084418                           |
| 164.912                                                      | 0.985                                           | 364.7660495                          | 0.372231417                           |
| 288.4285714                                                  | 0.970885093                                     | 716.3618486                          | 0.351015707                           |
| 525.8627451                                                  | 0.946078431                                     | 1238.521407                          | 0.259875181                           |
| 282.9781659                                                  | 0.970524017                                     | 671.4757029                          | 0.336966295                           |
| 210.7339667                                                  | 0.9804038                                       | 379.9549631                          | 0.41532031                            |
| 386.765233                                                   | 0.969086022                                     | 819.517121                           | 0.304732694                           |
| 239.9087948                                                  | 0.990228013                                     | 657.491187                           | 0.33271735                            |
| 214.8872283                                                  | 0.987771739                                     | 390.9320543                          | 0.372186759                           |
| 196.824295                                                   | 0.982104121                                     | 344.3346495                          | 0.391547409                           |
| 292.7666151                                                  | 0.955950541                                     | 523.2745013                          | 0.403505058                           |
| 400.5284091                                                  | 0.944602273                                     | 1116.264683                          | 0.325560139                           |
| 271.0662526                                                  | 0.967391304                                     | 560.3918351                          | 0.338870849                           |
| 228.7935323                                                  | 0.989738806                                     | 365.5776159                          | 0.465198972                           |
| 255.1411043                                                  | 0.97392638                                      | 544.8165564                          | 0.381728251                           |
| 290.555336                                                   | 0.973320158                                     | 638.9368996                          | 0.325100708                           |
| 509.7053942                                                  | 0.912863071                                     | 1149.777261                          | 0.346956447                           |
| 253.9892473                                                  | 0.978494624                                     | 440.5437635                          | 0.425304509                           |
| 231.876588                                                   | 0.972096189                                     | 488.248126                           | 0.38940984                            |
| 245.0703625                                                  | 0.97761194                                      | 512.5476037                          | 0.371085211                           |
| 250.1332436                                                  | 0.960632571                                     | 494.6823707                          | 0.401955473                           |
| 518.6506379                                                  | 0.919774289                                     | 1088.263986                          | 0.285160783                           |
| 263.0976801                                                  | 0.954212454                                     | 559.6835135                          | 0.333828621                           |
| 347.512                                                      | 0.934                                           | 801.2694087                          | 0.324249456                           |
| 197.0823529                                                  | 0.973529412                                     | 479.953956                           | 0.339974112                           |
| 411.9383309                                                  | 0.958456425                                     | 1065.475299                          | 0.352831777                           |

| log.sigma.4.0.mm.3D_glcml_Homogeneity2 | log.sigma.4.0.mm.3D_glcml_ClusterShade | log.sigma.4.0.mm.3D_glcml_MaximumProbability | log.sigma.4.0.mm.3D_glcml_Idmn | log.sigma.4.0.mm.3D_glcml_SumVariance2 |
|----------------------------------------|----------------------------------------|----------------------------------------------|--------------------------------|----------------------------------------|
| 0.21135972                             | 420.1993334                            | 0.010854172                                  | 0.974776363                    | 115.1533723                            |
| 0.191806199                            | -120.367978                            | 0.016473738                                  | 0.962920018                    | 120.1931222                            |
| 0.200174292                            | -178.2307983                           | 0.013129573                                  | 0.967807723                    | 104.6963268                            |
| 0.173545853                            | -175.6662416                           | 0.014766936                                  | 0.962499754                    | 132.5016283                            |
| 0.226509317                            | 143.379654                             | 0.01017518                                   | 0.973763182                    | 102.3352341                            |
| 0.202676981                            | -69.20175782                           | 0.01742079                                   | 0.962644082                    | 120.0244684                            |
| 0.421635275                            | 241.6553238                            | 0.081831218                                  | 0.990403617                    | 53.7937925                             |
| 0.276269632                            | 357.4878596                            | 0.023861498                                  | 0.979839737                    | 84.68113999                            |
| 0.338822883                            | 432.8435365                            | 0.042745956                                  | 0.979487229                    | 66.659548                              |
| 0.264993582                            | 133.5854942                            | 0.014954573                                  | 0.973052497                    | 64.04058604                            |
| 0.364900749                            | 87.42201075                            | 0.039107975                                  | 0.981295738                    | 35.80993233                            |
| 0.361329602                            | 200.2921003                            | 0.039645264                                  | 0.984960075                    | 54.37557854                            |
| 0.213416341                            | -527.2542151                           | 0.014488551                                  | 0.968382446                    | 117.8309168                            |
| 0.1728055                              | -250.4805452                           | 0.011020309                                  | 0.967454417                    | 123.9233342                            |
| 0.264253436                            | 452.4236234                            | 0.015838325                                  | 0.979217536                    | 80.75475857                            |
| 0.362313731                            | 213.626254                             | 0.062918971                                  | 0.977866696                    | 79.33200812                            |
| 0.318320363                            | 48.37666208                            | 0.020866962                                  | 0.972153413                    | 40.50312914                            |
| 0.19045429                             | 23.41377427                            | 0.014204206                                  | 0.96858461                     | 129.5039525                            |
| 0.365333318                            | 51.36875261                            | 0.032506843                                  | 0.978376314                    | 32.90044231                            |
| 0.297367303                            | 310.2112065                            | 0.020164868                                  | 0.988356451                    | 69.01843357                            |
| 0.263046903                            | 6.263763471                            | 0.011875633                                  | 0.971360849                    | 85.74056446                            |
| 0.223766263                            | -167.0725908                           | 0.015799179                                  | 0.965366567                    | 87.11944309                            |
| 0.25059805                             | 57.75964309                            | 0.015306475                                  | 0.972821899                    | 80.27841591                            |
| 0.427355384                            | 96.28304875                            | 0.08663548                                   | 0.98384163                     | 37.34845578                            |
| 0.291305923                            | 52.92416913                            | 0.044184206                                  | 0.976618089                    | 99.11600983                            |
| 0.271227028                            | 62.6711949                             | 0.018513427                                  | 0.984572805                    | 97.43394235                            |
| 0.226265899                            | 299.0077881                            | 0.011444435                                  | 0.978326131                    | 89.83972344                            |
| 0.306482373                            | 114.9822746                            | 0.018843158                                  | 0.978678595                    | 56.47704394                            |
| 0.35309616                             | 96.91819867                            | 0.043414156                                  | 0.97742421                     | 32.36399963                            |
| 0.277076239                            | 106.509625                             | 0.014866544                                  | 0.98050684                     | 62.14756398                            |
| 0.291724412                            | 337.6503143                            | 0.013817453                                  | 0.979696827                    | 78.53650031                            |
| 0.193831064                            | -214.595088                            | 0.010820317                                  | 0.961708523                    | 107.3529627                            |
| 0.292254708                            | 414.0099664                            | 0.017713183                                  | 0.985035201                    | 83.65457027                            |
| 0.332808094                            | 191.7134159                            | 0.033500844                                  | 0.982309294                    | 75.75671612                            |
| 0.299860323                            | 306.2273455                            | 0.018738763                                  | 0.982911149                    | 71.53673636                            |
| 0.22762851                             | -323.9457608                           | 0.012772855                                  | 0.970482987                    | 97.9865034                             |
| 0.183383768                            | -579.8736385                           | 0.010269327                                  | 0.9641073                      | 124.957339                             |
| 0.389102383                            | 197.9214438                            | 0.103693529                                  | 0.982494569                    | 83.61764896                            |
| 0.264027919                            | -114.770583                            | 0.018547505                                  | 0.971084679                    | 57.02279612                            |
| 0.38457863                             | 217.2492618                            | 0.048871155                                  | 0.993803752                    | 58.53713827                            |
| 0.238573262                            | 199.6801662                            | 0.01281704                                   | 0.978956527                    | 93.74734971                            |
| 0.435171364                            | 101.0002711                            | 0.074728283                                  | 0.990927807                    | 31.9821731                             |
| 0.205231196                            | 62.86659855                            | 0.009558841                                  | 0.970327309                    | 122.6734065                            |
| 0.228434999                            | 330.7980468                            | 0.01066169                                   | 0.976545335                    | 99.08867696                            |
| 0.391505698                            | 157.1338163                            | 0.074012035                                  | 0.985636706                    | 50.35780075                            |
| 0.242516258                            | 173.3542983                            | 0.012915935                                  | 0.974697681                    | 96.15145692                            |
| 0.332698845                            | 135.6880301                            | 0.024002685                                  | 0.985648484                    | 58.43970276                            |
| 0.288700112                            | -73.40922092                           | 0.025851148                                  | 0.973762332                    | 48.13646257                            |
| 0.226677061                            | 417.2687695                            | 0.015148163                                  | 0.974180635                    | 95.62805529                            |
| 0.199136572                            | -316.1976614                           | 0.013981807                                  | 0.96774023                     | 104.3150513                            |
| 0.255184382                            | 524.7685117                            | 0.017013973                                  | 0.97632879                     | 87.17717506                            |
| 0.23571657                             | 271.9196204                            | 0.010843834                                  | 0.981056232                    | 93.84234377                            |
| 0.487185524                            | 115.2464401                            | 0.099339465                                  | 0.989826974                    | 32.76230282                            |
| 0.304646738                            | 22.63488711                            | 0.016448768                                  | 0.984388453                    | 51.74627625                            |
| 0.176578922                            | -370.825687                            | 0.010991173                                  | 0.967091433                    | 141.7280737                            |
| 0.229537832                            | 406.4331101                            | 0.009778442                                  | 0.9734286                      | 100.6290735                            |
| 0.319213493                            | 282.704811                             | 0.023807981                                  | 0.981378304                    | 71.24709379                            |
| 0.228151863                            | 5.730560674                            | 0.01003723                                   | 0.975567462                    | 81.11155638                            |
| 0.230033118                            | -33.04152367                           | 0.013773453                                  | 0.967050863                    | 73.73170559                            |
| 0.431419605                            | 59.8662114                             | 0.104142707                                  | 0.989693362                    | 46.75154287                            |
| 0.255938672                            | 146.4004076                            | 0.015136939                                  | 0.978643051                    | 74.29840277                            |
| 0.227900056                            | 152.4668839                            | 0.014106318                                  | 0.980483281                    | 104.6319847                            |
| 0.269233747                            | 300.0646644                            | 0.017998078                                  | 0.985667764                    | 96.72198311                            |
| 0.245495446                            | 59.81189871                            | 0.011203492                                  | 0.98361742                     | 99.67681321                            |
| 0.255760363                            | 12.83740681                            | 0.016606292                                  | 0.972442727                    | 57.64708216                            |
| 0.218110237                            | 124.2375943                            | 0.009214916                                  | 0.981550618                    | 90.45705942                            |
| 0.202273419                            | -335.092488                            | 0.014442676                                  | 0.96075797                     | 94.2950421                             |
| 0.256740044                            | 338.087942                             | 0.012511171                                  | 0.984967418                    | 80.06427271                            |
| 0.346588637                            | 151.4295622                            | 0.025823837                                  | 0.987321718                    | 56.446931                              |
| 0.260118487                            | 0.831687609                            | 0.012866658                                  | 0.977030819                    | 76.32031143                            |
| 0.220483321                            | 63.66020775                            | 0.013931733                                  | 0.963996062                    | 84.83435213                            |
| 0.285478773                            | 107.207489                             | 0.033280476                                  | 0.980503326                    | 81.25949346                            |
| 0.217671644                            | 339.4237292                            | 0.013736807                                  | 0.969819183                    | 105.0524706                            |
| 0.259910813                            | 190.300059                             | 0.016021152                                  | 0.976314236                    | 65.12986142                            |
| 0.357691594                            | 364.5940172                            | 0.050567977                                  | 0.988859808                    | 68.55632509                            |
| 0.282539879                            | -14.96073658                           | 0.017123957                                  | 0.971621712                    | 46.84217922                            |
| 0.260858594                            | 26.47259738                            | 0.011261076                                  | 0.982970676                    | 75.80821792                            |
| 0.166605488                            | -906.4166787                           | 0.014478703                                  | 0.959426018                    | 142.6764503                            |
| 0.244577559                            | 50.31960618                            | 0.012967133                                  | 0.977749495                    | 83.9068457                             |
| 0.337602499                            | 105.2330719                            | 0.026167685                                  | 0.985521801                    | 47.88851871                            |
| 0.213991151                            | 441.8639813                            | 0.011101794                                  | 0.975489992                    | 113.7147489                            |
| 0.240635183                            | -179.5611985                           | 0.012946077                                  | 0.971966822                    | 81.91500187                            |
| 0.289259987                            | 175.8700909                            | 0.043846193                                  | 0.971678334                    | 73.44142716                            |
| 0.307816385                            | 85.3647473                             | 0.02058308                                   | 0.981739491                    | 47.06214737                            |
| 0.326522626                            | 283.1543804                            | 0.033641083                                  | 0.981318211                    | 72.10358471                            |
| 0.235457263                            | -658.7635978                           | 0.025275099                                  | 0.975419839                    | 79.80185466                            |
| 0.250008532                            | 125.6231461                            | 0.014048947                                  | 0.97347587                     | 81.99361582                            |
| 0.400893824                            | 309.9988737                            | 0.068936369                                  | 0.983008746                    | 62.99657347                            |
| 0.299438115                            | 53.463312                              | 0.02304894                                   | 0.982088856                    | 59.92150772                            |
| 0.232659996                            | 150.4644709                            | 0.010809239                                  | 0.97631452                     | 94.28724097                            |
| 0.260179715                            | -135.2162563                           | 0.017644249                                  | 0.977431514                    | 94.18842567                            |
| 0.351389478                            | 74.80077046                            | 0.034418968                                  | 0.982677491                    | 55.2357362                             |
| 0.305280221                            | 154.3818764                            | 0.013903374                                  | 0.987140803                    | 57.81306687                            |
| 0.285686341                            | 213.8749896                            | 0.015070279                                  | 0.9830069                      | 74.85777138                            |
| 0.318737526                            | 54.83768163                            | 0.016466126                                  | 0.98335464                     | 45.62764011                            |
| 0.192961009                            | 285.7819186                            | 0.007287916                                  | 0.978587403                    | 132.0984129                            |
| 0.242763787                            | 94.21947161                            | 0.009219498                                  | 0.975742673                    | 87.8943749                             |
| 0.230822761                            | -356.3722592                           | 0.017846639                                  | 0.9706812                      | 79.10419019                            |
| 0.249029737                            | -262.7273138                           | 0.026245367                                  | 0.962418103                    | 60.19997492                            |
| 0.267148902                            | 66.43216867                            | 0.017846446                                  | 0.982581979                    | 79.27411578                            |

| log.sigma.4.0.mm.3D_glc_m_Contrast | log.sigma.4.0.mm.3D_glc_m_DifferenceEntropy | log.sigma.4.0.mm.3D_glc_m_InverseVariance | log.sigma.4.0.mm.3D_glc_m_Entropy | log.sigma.4.0.mm.3D_glc_m_Dissimilarity |
|------------------------------------|---------------------------------------------|-------------------------------------------|-----------------------------------|-----------------------------------------|
| 33.33274024                        | 3.58626466                                  | 0.215028463                               | 8.585223699                       | 4.505658896                             |
| 34.35255908                        | 3.52142271                                  | 0.195006379                               | 7.841816107                       | 4.711867277                             |
| 33.60723879                        | 3.513614645                                 | 0.202703481                               | 8.310255625                       | 4.649855831                             |
| 39.90527808                        | 3.622624845                                 | 0.187643022                               | 7.988358179                       | 5.086031607                             |
| 23.86008965                        | 3.348155297                                 | 0.238645021                               | 8.302185161                       | 3.860385762                             |
| 28.05361655                        | 3.392063163                                 | 0.211437611                               | 7.53721769                        | 4.23096184                              |
| 13.8412219                         | 2.94664466                                  | 0.312327823                               | 7.26529368                        | 2.470275123                             |
| 25.04042056                        | 3.399574612                                 | 0.265186767                               | 8.332196727                       | 3.720886544                             |
| 17.4292305                         | 3.135806011                                 | 0.298798089                               | 7.71710972                        | 3.009693387                             |
| 16.87767726                        | 3.10597696                                  | 0.267244471                               | 7.676031611                       | 3.223051685                             |
| 9.654479745                        | 2.747599277                                 | 0.350462131                               | 7.006033269                       | 2.335265343                             |
| 14.39589546                        | 3.027228818                                 | 0.323370588                               | 7.517020309                       | 2.714616344                             |
| 33.38167069                        | 3.538815776                                 | 0.215585138                               | 8.288686006                       | 4.513353038                             |
| 38.71061242                        | 3.59906004                                  | 0.181437078                               | 8.365771382                       | 5.01176923                              |
| 26.15869983                        | 3.398534693                                 | 0.259372174                               | 8.077737461                       | 3.786062054                             |
| 21.84194889                        | 3.164720948                                 | 0.292256027                               | 7.784991718                       | 3.223119585                             |
| 11.01254605                        | 2.845780898                                 | 0.324011163                               | 7.222836746                       | 2.570448101                             |
| 35.16855112                        | 3.560900483                                 | 0.193274721                               | 8.065378506                       | 4.731987059                             |
| 9.35237608                         | 2.712674453                                 | 0.358854464                               | 6.892152614                       | 2.292727261                             |
| 18.56617256                        | 3.194814454                                 | 0.287693877                               | 8.021566698                       | 3.198706004                             |
| 19.61289369                        | 3.212963133                                 | 0.267646919                               | 8.103709056                       | 3.426215935                             |
| 23.83920247                        | 3.310664412                                 | 0.229471091                               | 7.871682696                       | 3.886268663                             |
| 21.5325587                         | 3.261290658                                 | 0.254741555                               | 7.83529081                        | 3.614310386                             |
| 9.240377438                        | 2.733000555                                 | 0.351980203                               | 6.904891645                       | 2.110413437                             |
| 27.79834077                        | 3.388322701                                 | 0.260170324                               | 8.07539359                        | 3.822099463                             |
| 23.58638212                        | 3.337902457                                 | 0.271012555                               | 8.205487361                       | 3.627281399                             |
| 28.52294672                        | 3.425563075                                 | 0.234042896                               | 8.296440426                       | 4.125527623                             |
| 14.33136506                        | 3.035352841                                 | 0.299839342                               | 7.692608781                       | 2.884417027                             |
| 8.766952264                        | 2.642164469                                 | 0.34042676                                | 6.184503068                       | 2.281661247                             |
| 16.29240812                        | 3.087122209                                 | 0.278744405                               | 7.779774766                       | 3.130195871                             |
| 19.61006298                        | 3.202795805                                 | 0.283459949                               | 8.048790283                       | 3.319051517                             |
| 33.2795148                         | 3.541913029                                 | 0.194697732                               | 8.318849286                       | 4.62546851                              |
| 19.3465216                         | 3.216482502                                 | 0.283011766                               | 8.067815865                       | 3.295138246                             |
| 18.22522456                        | 3.157108188                                 | 0.296352265                               | 7.793985461                       | 3.073555611                             |
| 18.70443762                        | 3.205625766                                 | 0.290916222                               | 8.002085655                       | 3.201215537                             |
| 31.03671874                        | 3.5057921                                   | 0.224759176                               | 8.472357028                       | 4.314599518                             |
| 43.79052718                        | 3.59148985                                  | 0.187496938                               | 8.650505709                       | 5.156666603                             |
| 20.56158756                        | 3.173257122                                 | 0.278023808                               | 7.677758884                       | 3.07118835                              |
| 15.17663142                        | 2.963589685                                 | 0.273565651                               | 7.431157167                       | 3.111717034                             |
| 12.62267991                        | 2.937327116                                 | 0.332948932                               | 7.543077121                       | 2.482215159                             |
| 22.995162                          | 3.322942293                                 | 0.246784124                               | 8.212043624                       | 3.748497345                             |
| 7.968800319                        | 2.65847163                                  | 0.358842073                               | 6.7461366                         | 1.980857291                             |
| 37.46675379                        | 3.474841811                                 | 0.205435482                               | 8.632700799                       | 4.782402052                             |
| 24.16073315                        | 3.353755339                                 | 0.229835767                               | 8.27765449                        | 3.877524256                             |
| 12.06452235                        | 2.881231964                                 | 0.34029051                                | 7.123236861                       | 2.432762484                             |
| 26.27300617                        | 3.418210981                                 | 0.239227259                               | 8.399129932                       | 3.972054737                             |
| 15.59614333                        | 3.083731859                                 | 0.308587409                               | 7.761823488                       | 2.874516178                             |
| 13.70937375                        | 2.972026233                                 | 0.286787707                               | 7.218234571                       | 2.914572032                             |
| 21.89848853                        | 3.230277329                                 | 0.238296618                               | 7.739095385                       | 3.718933457                             |
| 29.70243877                        | 3.455207759                                 | 0.204263729                               | 7.990198702                       | 4.370667388                             |
| 22.97946555                        | 3.337300086                                 | 0.255479303                               | 7.987997748                       | 3.68759286                              |
| 24.73089065                        | 3.388781155                                 | 0.24170643                                | 8.416668195                       | 3.843516607                             |
| 7.828582748                        | 2.596614067                                 | 0.362504212                               | 6.527614005                       | 1.844479454                             |
| 15.91643951                        | 3.028929247                                 | 0.30959141                                | 7.567039676                       | 2.97916281                              |
| 39.20932137                        | 3.638554211                                 | 0.185530238                               | 8.457425375                       | 5.032264104                             |
| 24.26153215                        | 3.34778155                                  | 0.237222276                               | 8.211712833                       | 3.871393429                             |
| 18.00534028                        | 3.150614431                                 | 0.295730817                               | 7.89966434                        | 3.103242677                             |
| 25.16477811                        | 3.379056846                                 | 0.238004923                               | 8.193212638                       | 3.961869108                             |
| 22.6077445                         | 3.300811244                                 | 0.233673036                               | 7.965625409                       | 3.78009281                              |
| 11.83059597                        | 2.871759948                                 | 0.321179567                               | 7.174556411                       | 2.312997153                             |
| 22.01957892                        | 3.302631508                                 | 0.259246885                               | 8.067783951                       | 3.609824953                             |
| 26.86534498                        | 3.442325278                                 | 0.231661001                               | 8.540068053                       | 4.050761811                             |
| 25.41794783                        | 3.395710753                                 | 0.26222568                                | 8.488077619                       | 3.747769528                             |
| 22.42691422                        | 3.319280016                                 | 0.249012839                               | 8.374685619                       | 3.665740804                             |
| 18.68235192                        | 3.167704364                                 | 0.264128961                               | 7.681085556                       | 3.399851118                             |
| 26.69847486                        | 3.435306305                                 | 0.227061433                               | 8.48873407                        | 4.076797062                             |
| 29.59868003                        | 3.424163017                                 | 0.213652803                               | 7.890931854                       | 4.343376676                             |
| 21.63733704                        | 3.307190274                                 | 0.259712641                               | 8.242011106                       | 3.578073935                             |
| 11.98630305                        | 2.92428161                                  | 0.32799941                                | 7.589106066                       | 2.567044108                             |
| 19.34771072                        | 3.228435734                                 | 0.262193056                               | 8.10127386                        | 3.426760202                             |
| 24.88128721                        | 3.296671941                                 | 0.226453232                               | 7.78449414                        | 3.973559808                             |
| 25.50590041                        | 3.391333897                                 | 0.265292225                               | 8.236695341                       | 3.753875634                             |
| 29.62802119                        | 3.484456174                                 | 0.216901723                               | 8.346852131                       | 4.290788787                             |
| 18.58231668                        | 3.18493282                                  | 0.269094653                               | 7.76569241                        | 3.361278224                             |
| 15.18297171                        | 3.052144219                                 | 0.310249056                               | 7.660445228                       | 2.764718197                             |
| 13.5704091                         | 2.951268266                                 | 0.283503032                               | 7.414956328                       | 2.919644281                             |
| 18.41777938                        | 3.19326377                                  | 0.264641854                               | 8.060390613                       | 3.347054831                             |
| 46.3665114                         | 3.708465799                                 | 0.166399742                               | 7.965780928                       | 5.467622416                             |
| 20.11660221                        | 3.230950836                                 | 0.254813897                               | 8.137813073                       | 3.515058486                             |
| 12.94640982                        | 2.955586157                                 | 0.329851958                               | 7.437674368                       | 2.646930838                             |
| 32.30717906                        | 3.56296423                                  | 0.217211091                               | 8.546974513                       | 4.437053999                             |
| 20.51922466                        | 3.228735325                                 | 0.250440221                               | 7.991601488                       | 3.593710525                             |
| 22.73102299                        | 3.303071539                                 | 0.248148635                               | 7.955334247                       | 3.56147637                              |
| 13.15184265                        | 2.960210884                                 | 0.313743796                               | 7.500728849                       | 2.775253955                             |
| 16.86289673                        | 3.115476468                                 | 0.305297471                               | 7.826401369                       | 3.004916729                             |
| 25.46733899                        | 3.377098496                                 | 0.242025985                               | 7.531925919                       | 3.925067701                             |
| 22.6118466                         | 3.29467852                                  | 0.256688832                               | 8.131902398                       | 3.676831337                             |
| 14.42013522                        | 2.98448795                                  | 0.329227482                               | 7.415184164                       | 2.589656525                             |
| 17.18446732                        | 3.147057276                                 | 0.295825137                               | 7.788142566                       | 3.113614629                             |
| 22.8952846                         | 3.31739214                                  | 0.242677616                               | 8.241752508                       | 3.769533602                             |
| 23.48015452                        | 3.317607416                                 | 0.261312454                               | 7.990333543                       | 3.670224423                             |
| 13.5910304                         | 2.964061364                                 | 0.333204179                               | 7.494915073                       | 2.663842144                             |
| 13.77504942                        | 3.015890043                                 | 0.303488929                               | 7.74409845                        | 2.841537656                             |
| 17.27568586                        | 3.150086455                                 | 0.28205463                                | 8.018937352                       | 3.18230768                              |
| 10.99427578                        | 2.828312923                                 | 0.327121708                               | 7.401451833                       | 2.566633626                             |
| 36.5101475                         | 3.632761548                                 | 0.203186775                               | 8.84526808                        | 4.7737770138                            |
| 22.03398543                        | 3.290026684                                 | 0.252392681                               | 8.28092449                        | 3.658802685                             |
| 23.41107216                        | 3.303390897                                 | 0.236452034                               | 7.527475597                       | 3.794561015                             |
| 20.26410974                        | 3.171849276                                 | 0.251295066                               | 7.159907728                       | 3.546171031                             |
| 22.68047927                        | 3.325330022                                 | 0.26311298                                | 8.301116122                       | 3.607022816                             |

| log.sigma.4.0.mm.3D_glcm_DifferenceVariance | log.sigma.4.0.mm.3D_glcm_ldn | log.sigma.4.0.mm.3D_glcm_ldm | log.sigma.4.0.mm.3D_glcm_Correlation | log.sigma.4.0.mm.3D_glcm_Autocorrelation |
|---------------------------------------------|------------------------------|------------------------------|--------------------------------------|------------------------------------------|
| 12.33748583                                 | 0.892898125                  | 0.21135972                   | 0.554565488                          | 278.9163456                              |
| 10.96058604                                 | 0.8690204                    | 0.191806199                  | 0.561324061                          | 236.0797998                              |
| 10.54933575                                 | 0.87744737                   | 0.200174292                  | 0.515979857                          | 264.4083542                              |
| 12.96225437                                 | 0.867820551                  | 0.173545853                  | 0.543006437                          | 272.1522602                              |
| 8.506978721                                 | 0.889393706                  | 0.226509317                  | 0.621696934                          | 187.6721054                              |
| 9.396453241                                 | 0.869024286                  | 0.202676981                  | 0.622070414                          | 235.0853579                              |
| 7.442153374                                 | 0.941628454                  | 0.421635275                  | 0.594514377                          | 162.1618376                              |
| 10.65571177                                 | 0.907912224                  | 0.276269632                  | 0.547503371                          | 246.0872758                              |
| 7.82541777                                  | 0.91012087                   | 0.338822883                  | 0.583753086                          | 142.8703481                              |
| 6.040390192                                 | 0.888810117                  | 0.264993582                  | 0.58173866                           | 158.883426                               |
| 3.918903944                                 | 0.910013643                  | 0.364900749                  | 0.572648135                          | 109.285506                               |
| 6.789723439                                 | 0.922545284                  | 0.361329602                  | 0.58174026                           | 160.4796143                              |
| 11.77067224                                 | 0.881352714                  | 0.213416341                  | 0.562889023                          | 293.6156634                              |
| 12.08783571                                 | 0.875891953                  | 0.1728055                    | 0.531594739                          | 269.7268937                              |
| 11.15599227                                 | 0.906547555                  | 0.264253436                  | 0.515747182                          | 151.6011605                              |
| 10.16875741                                 | 0.911448692                  | 0.362313731                  | 0.571753183                          | 172.6359886                              |
| 4.244505202                                 | 0.888552273                  | 0.318320363                  | 0.573113487                          | 90.54136458                              |
| 11.84461288                                 | 0.878953354                  | 0.19045429                   | 0.575370795                          | 205.004933                               |
| 3.823527943                                 | 0.903959898                  | 0.365333318                  | 0.557219285                          | 92.80199121                              |
| 7.875115973                                 | 0.928204525                  | 0.297367303                  | 0.580556289                          | 344.7487579                              |
| 7.404059126                                 | 0.88742684                   | 0.263046903                  | 0.627686079                          | 160.4308615                              |
| 8.072117503                                 | 0.874019994                  | 0.223766263                  | 0.572908503                          | 187.0589063                              |
| 7.91387768                                  | 0.889396299                  | 0.25059805                   | 0.575936159                          | 152.4615314                              |
| 4.633277459                                 | 0.922199463                  | 0.427355384                  | 0.602678586                          | 101.6507738                              |
| 12.08023715                                 | 0.904169054                  | 0.291305923                  | 0.566025979                          | 286.5622772                              |
| 9.796017481                                 | 0.917951357                  | 0.271227028                  | 0.605089161                          | 389.9015926                              |
| 10.16678054                                 | 0.900803258                  | 0.226265899                  | 0.525945806                          | 240.9491089                              |
| 5.734347984                                 | 0.902988117                  | 0.306482373                  | 0.595704194                          | 122.3561928                              |
| 3.35128115                                  | 0.899349817                  | 0.35309616                   | 0.574327445                          | 91.42295218                              |
| 6.050373939                                 | 0.905077006                  | 0.277076239                  | 0.585607823                          | 165.2101139                              |
| 7.877732958                                 | 0.906845179                  | 0.291724412                  | 0.600830582                          | 182.0328001                              |
| 10.92990529                                 | 0.867320209                  | 0.193831064                  | 0.529959667                          | 249.8083641                              |
| 7.984567607                                 | 0.918879785                  | 0.292254708                  | 0.626018866                          | 198.6791399                              |
| 8.335778732                                 | 0.916100007                  | 0.332808094                  | 0.61325421                           | 201.8254458                              |
| 8.108219716                                 | 0.914752196                  | 0.299860323                  | 0.587828711                          | 204.4183736                              |
| 11.14644226                                 | 0.886004321                  | 0.22762851                   | 0.526299854                          | 302.4498976                              |
| 12.73520484                                 | 0.874271993                  | 0.183383768                  | 0.500495439                          | 363.3259362                              |
| 10.46551368                                 | 0.9219585                    | 0.389102383                  | 0.607770734                          | 186.3831225                              |
| 4.688382295                                 | 0.883311772                  | 0.264027919                  | 0.58355968                           | 132.9694625                              |
| 6.252389622                                 | 0.947047443                  | 0.38457863                   | 0.646858031                          | 486.55251                                |
| 8.419713067                                 | 0.901024023                  | 0.238573262                  | 0.606657807                          | 196.2575436                              |
| 3.917313561                                 | 0.939691725                  | 0.435171364                  | 0.601956256                          | 142.2048478                              |
| 10.59904767                                 | 0.884673443                  | 0.205231196                  | 0.546935576                          | 302.5135573                              |
| 8.534978221                                 | 0.895106435                  | 0.228434999                  | 0.610168499                          | 199.3800133                              |
| 5.932463951                                 | 0.925574234                  | 0.391505698                  | 0.614253964                          | 127.8222527                              |
| 9.75704842                                  | 0.89356478                   | 0.242516258                  | 0.572997261                          | 217.8784279                              |
| 7.048978377                                 | 0.922649063                  | 0.332698845                  | 0.580652266                          | 233.9913988                              |
| 4.907553868                                 | 0.890023127                  | 0.288700112                  | 0.557657911                          | 117.6817795                              |
| 7.323274644                                 | 0.889374064                  | 0.226677061                  | 0.63128771                           | 162.4085842                              |
| 9.720875886                                 | 0.876835828                  | 0.199136572                  | 0.560735857                          | 289.4104161                              |
| 8.940626882                                 | 0.897405315                  | 0.255184382                  | 0.578390152                          | 166.9660119                              |
| 9.440691129                                 | 0.906582063                  | 0.23571657                   | 0.586228104                          | 291.100329                               |
| 4.303975716                                 | 0.940563527                  | 0.487185524                  | 0.615379454                          | 108.9025305                              |
| 6.175805246                                 | 0.917453345                  | 0.304646738                  | 0.537054559                          | 289.3854882                              |
| 12.82904118                                 | 0.875576372                  | 0.176578922                  | 0.571248659                          | 304.1030218                              |
| 8.67842712                                  | 0.889295554                  | 0.229537832                  | 0.610106847                          | 166.483745                               |
| 7.714852727                                 | 0.912608628                  | 0.319213493                  | 0.597299654                          | 170.5176287                              |
| 8.904064231                                 | 0.893192499                  | 0.228151863                  | 0.528508816                          | 287.2191905                              |
| 7.788797411                                 | 0.876882543                  | 0.230033118                  | 0.531714759                          | 152.0389457                              |
| 6.242693309                                 | 0.938915314                  | 0.431419605                  | 0.600267267                          | 245.178994                               |
| 8.451421418                                 | 0.901958701                  | 0.255938672                  | 0.54600042                           | 228.0201759                              |
| 9.826190574                                 | 0.904374158                  | 0.227900056                  | 0.593591283                          | 311.5059596                              |
| 10.59841391                                 | 0.921071203                  | 0.269233747                  | 0.586252973                          | 366.6274816                              |
| 8.471076658                                 | 0.912431173                  | 0.245495446                  | 0.634919162                          | 276.6466642                              |
| 6.578142671                                 | 0.887596983                  | 0.255760363                  | 0.510980046                          | 141.8011502                              |
| 9.441423329                                 | 0.905833538                  | 0.218110237                  | 0.549391588                          | 331.0545231                              |
| 9.832211003                                 | 0.866264365                  | 0.202273419                  | 0.525786512                          | 255.2532326                              |
| 8.364843539                                 | 0.916411145                  | 0.256740044                  | 0.576996119                          | 311.1034239                              |
| 5.172360074                                 | 0.925525817                  | 0.346588637                  | 0.649895484                          | 184.1085478                              |
| 7.234225491                                 | 0.897386651                  | 0.260118487                  | 0.597147538                          | 243.6948645                              |
| 7.913080981                                 | 0.871677522                  | 0.220483321                  | 0.546228548                          | 155.0335596                              |
| 10.84750184                                 | 0.909543534                  | 0.285478773                  | 0.529618195                          | 264.9597452                              |
| 10.44950721                                 | 0.882744696                  | 0.217671644                  | 0.561041223                          | 165.0111079                              |
| 6.892073711                                 | 0.895866442                  | 0.259910813                  | 0.553958715                          | 133.5806119                              |
| 7.151734797                                 | 0.932952692                  | 0.357691594                  | 0.641562036                          | 202.8269531                              |
| 4.601203512                                 | 0.885260056                  | 0.282539879                  | 0.553702604                          | 135.7898141                              |
| 6.823361989                                 | 0.910219732                  | 0.260858594                  | 0.609631644                          | 246.0086174                              |
| 14.99267568                                 | 0.863559605                  | 0.166605488                  | 0.519246387                          | 394.0966225                              |
| 7.292336651                                 | 0.897986158                  | 0.244577559                  | 0.61454814                           | 232.5293163                              |
| 5.724859456                                 | 0.912325456                  | 0.337602499                  | 0.575320993                          | 141.0969853                              |
| 11.94265355                                 | 0.894264593                  | 0.213991151                  | 0.561043584                          | 275.6761196                              |
| 7.037246013                                 | 0.885776398                  | 0.240635183                  | 0.601596094                          | 227.5187146                              |
| 9.222328315                                 | 0.892241667                  | 0.289259987                  | 0.526350726                          | 143.5319503                              |
| 5.148964695                                 | 0.909074869                  | 0.307816385                  | 0.564735248                          | 129.7834975                              |
| 7.365079001                                 | 0.912481987                  | 0.326522626                  | 0.62206539                           | 186.5111543                              |
| 9.438563097                                 | 0.894475514                  | 0.235457263                  | 0.52129231                           | 358.1375429                              |
| 8.438777304                                 | 0.891388981                  | 0.250008532                  | 0.569710439                          | 197.587714                               |
| 7.479328301                                 | 0.922122353                  | 0.400893824                  | 0.626021095                          | 136.1468551                              |
| 7.160740828                                 | 0.911705356                  | 0.299438115                  | 0.554801879                          | 192.4704841                              |
| 8.220247498                                 | 0.894730139                  | 0.232659996                  | 0.61117458                           | 222.2912056                              |
| 9.171467655                                 | 0.900999824                  | 0.260179715                  | 0.605554964                          | 372.9978937                              |
| 6.119609495                                 | 0.916298501                  | 0.351389478                  | 0.605385152                          | 160.463569                               |
| 5.473575081                                 | 0.922487718                  | 0.305280221                  | 0.615105546                          | 175.9566974                              |
| 6.777043739                                 | 0.91209998                   | 0.285686341                  | 0.624577494                          | 183.8153619                              |
| 4.057862879                                 | 0.911815859                  | 0.318737526                  | 0.61082754                           | 177.1110757                              |
| 12.62192872                                 | 0.899148467                  | 0.192961009                  | 0.569885044                          | 355.9931635                              |
| 8.017990967                                 | 0.894677595                  | 0.242763787                  | 0.599999519                          | 197.9726221                              |
| 8.426986239                                 | 0.884523021                  | 0.230822761                  | 0.547596789                          | 267.8545435                              |
| 6.918904677                                 | 0.87071908                   | 0.249029737                  | 0.504401115                          | 169.1969754                              |
| 9.042377129                                 | 0.912038533                  | 0.267148902                  | 0.55984953                           | 348.6348945                              |

| log.sigma.4.0.mm.3D_glcm_SumEntropy | log.sigma.4.0.mm.3D_glcm_AverageIntensity | log.sigma.4.0.mm.3D_glcm_Energy | log.sigma.4.0.mm.3D_glcm_SumSquares | log.sigma.4.0.mm.3D_glcm_ClusterProminence |
|-------------------------------------|-------------------------------------------|---------------------------------|-------------------------------------|--------------------------------------------|
| 5.40096487                          | 16.31642515                               | 0.003420094                     | 38.18890714                         | 37478.93636                                |
| 5.299312651                         | 14.69404977                               | 0.00529787                      | 39.33716905                         | 35971.10775                                |
| 5.286838776                         | 15.88321225                               | 0.003908159                     | 35.95370996                         | 25792.57269                                |
| 5.346480886                         | 15.96750639                               | 0.004650385                     | 44.45295236                         | 45211.62012                                |
| 5.298797403                         | 12.98942534                               | 0.003866586                     | 31.97225712                         | 25662.22586                                |
| 5.207473302                         | 14.60088587                               | 0.006226024                     | 37.63984192                         | 30937.87738                                |
| 4.770391779                         | 12.43659181                               | 0.018567774                     | 17.68197876                         | 12245.44764                                |
| 5.198773923                         | 15.36096507                               | 0.004800785                     | 28.41150366                         | 23953.89237                                |
| 4.948479598                         | 11.44959114                               | 0.008470982                     | 21.45485898                         | 16795.94689                                |
| 4.945531874                         | 12.12700715                               | 0.006134343                     | 20.22956582                         | 10311.41115                                |
| 4.55764967                          | 10.13597898                               | 0.012042734                     | 11.36610302                         | 4019.902182                                |
| 4.839062642                         | 12.29074395                               | 0.010204974                     | 17.54613825                         | 11257.23516                                |
| 5.31845435                          | 16.69168607                               | 0.004162677                     | 38.76843858                         | 32012.71167                                |
| 5.37631573                          | 16.02453466                               | 0.003646866                     | 41.90886297                         | 35868.57364                                |
| 5.107825064                         | 11.85456703                               | 0.005116966                     | 27.99919128                         | 21860.08724                                |
| 5.073691996                         | 12.63961184                               | 0.010739394                     | 26.00642606                         | 17252.83775                                |
| 4.659743749                         | 9.11916244                                | 0.008559793                     | 12.8789188                          | 4497.944808                                |
| 5.37804384                          | 13.53789009                               | 0.00444029                      | 41.88609982                         | 40372.42893                                |
| 4.500262233                         | 9.322424155                               | 0.012618216                     | 10.5632046                          | 3599.826124                                |
| 5.042908385                         | 18.42330916                               | 0.006142823                     | 21.50163323                         | 19340.62346                                |
| 5.186932839                         | 11.99471115                               | 0.00447862                      | 26.33836454                         | 17403.23161                                |
| 5.147382766                         | 13.08292854                               | 0.005319365                     | 27.73966139                         | 19093.63436                                |
| 5.093603307                         | 11.74324458                               | 0.005450913                     | 25.61200271                         | 17940.84254                                |
| 4.548303374                         | 9.727132497                               | 0.018790862                     | 11.6472083                          | 5568.765821                                |
| 5.270051491                         | 16.579394                                 | 0.006678376                     | 32.4940752                          | 27686.80384                                |
| 5.227065923                         | 19.43098263                               | 0.005214575                     | 30.18929066                         | 31425.99781                                |
| 5.229339173                         | 15.23410243                               | 0.004256772                     | 30.79798758                         | 24243.41065                                |
| 4.914304779                         | 10.57409184                               | 0.00654446                      | 17.70210225                         | 9129.950202                                |
| 4.243075195                         | 9.247726637                               | 0.016958108                     | 10.28273797                         | 2658.786243                                |
| 4.969959421                         | 12.4126716                                | 0.005845554                     | 19.84421093                         | 11757.1641                                 |
| 5.120194107                         | 13.00009086                               | 0.005104791                     | 25.33873108                         | 17514.09055                                |
| 5.289402149                         | 15.30019362                               | 0.003771925                     | 36.20720779                         | 25658.15636                                |
| 5.166428554                         | 13.60906443                               | 0.005500675                     | 26.50750873                         | 23231.10602                                |
| 5.069632791                         | 13.79653866                               | 0.007251887                     | 24.53500119                         | 14221.27768                                |
| 5.063012321                         | 13.91773409                               | 0.005821031                     | 23.44021932                         | 15039.40636                                |
| 5.28522991                          | 17.09150867                               | 0.003654275                     | 33.06049356                         | 25770.45204                                |
| 5.422419295                         | 18.83753483                               | 0.003215775                     | 42.50684304                         | 43337.02076                                |
| 5.057247041                         | 13.17891488                               | 0.017353116                     | 27.05700494                         | 21254.77016                                |
| 4.856610819                         | 11.06646134                               | 0.007201687                     | 18.04985689                         | 8136.317286                                |
| 4.92411966                          | 21.86333869                               | 0.01050104                      | 18.0330794                          | 13835.95068                                |
| 5.249002336                         | 13.45659512                               | 0.004224011                     | 30.15013953                         | 21928.7442                                 |
| 4.440458299                         | 11.67579385                               | 0.019538774                     | 10.08012302                         | 4883.739048                                |
| 5.465077087                         | 16.99298269                               | 0.003251683                     | 40.91596141                         | 40492.93997                                |
| 5.279991898                         | 13.54595754                               | 0.003960002                     | 32.03963021                         | 25740.94445                                |
| 4.703401407                         | 10.8788411                                | 0.015406524                     | 15.71090267                         | 11232.06964                                |
| 5.284280204                         | 14.29048275                               | 0.003849524                     | 31.9680731                          | 22780.55729                                |
| 4.944444177                         | 15.01597251                               | 0.00691204                      | 19.141881                           | 10842.79975                                |
| 4.702281024                         | 10.44281374                               | 0.008626924                     | 15.46145908                         | 6007.610957                                |
| 5.151738343                         | 12.04240037                               | 0.005591499                     | 30.21190564                         | 26537.79855                                |
| 5.257370439                         | 16.55683783                               | 0.00477119                      | 34.36223837                         | 28250.52668                                |
| 5.116861195                         | 12.3438252                                | 0.005446468                     | 28.42069711                         | 21997.62638                                |
| 5.28545363                          | 16.72941397                               | 0.003938967                     | 30.17224224                         | 28032.01373                                |
| 4.366012791                         | 10.13482166                               | 0.029134214                     | 10.20158093                         | 6183.983769                                |
| 4.843250539                         | 16.88964706                               | 0.007254172                     | 17.71892768                         | 8633.321628                                |
| 5.479155538                         | 16.94318032                               | 0.00340563                      | 46.02563779                         | 47647.42982                                |
| 5.256641398                         | 12.16270943                               | 0.004081248                     | 31.62820368                         | 26221.4469                                 |
| 5.056790994                         | 12.58801305                               | 0.006384005                     | 22.9784264                          | 15353.05218                                |
| 5.134015633                         | 16.70067468                               | 0.004050748                     | 27.49582947                         | 14446.22257                                |
| 5.071370648                         | 11.79896718                               | 0.004869048                     | 24.0846252                          | 13757.43537                                |
| 4.701320167                         | 15.47036931                               | 0.020237079                     | 15.23200032                         | 9204.494643                                |
| 5.099285369                         | 14.75507805                               | 0.004833392                     | 24.93086433                         | 15437.93785                                |
| 5.362875102                         | 17.26027789                               | 0.003644003                     | 33.0308778                          | 31863.18603                                |
| 5.295072159                         | 18.84320661                               | 0.00430703                      | 30.16310563                         | 27291.04649                                |
| 5.324759732                         | 16.17211665                               | 0.004019266                     | 31.01057783                         | 29658.0925                                 |
| 4.881697047                         | 11.49091817                               | 0.006102328                     | 19.08235852                         | 8697.788126                                |
| 5.270514329                         | 17.9842293                                | 0.003654288                     | 29.14081554                         | 26130.91787                                |
| 5.143460533                         | 15.49450342                               | 0.005045774                     | 31.37795558                         | 21634.22057                                |
| 5.160003834                         | 17.4106343                                | 0.004763663                     | 25.65838954                         | 22688.90245                                |
| 4.914051193                         | 13.18245917                               | 0.00763632                      | 17.50454448                         | 9973.613972                                |
| 5.135302696                         | 15.18154704                               | 0.004677339                     | 24.33911584                         | 15255.06024                                |
| 5.085190059                         | 11.83151734                               | 0.005411043                     | 27.42890983                         | 15255.14153                                |
| 5.161479376                         | 16.09012639                               | 0.005659584                     | 27.61607407                         | 20396.1739                                 |
| 5.282211107                         | 12.14122523                               | 0.003833123                     | 34.37582036                         | 26376.09355                                |
| 4.966988257                         | 11.04282829                               | 0.005778749                     | 20.98191667                         | 11749.77229                                |
| 5.004268017                         | 13.85983165                               | 0.01013243                      | 21.66111267                         | 20456.91477                                |
| 4.749972065                         | 11.28934945                               | 0.007222313                     | 15.10314708                         | 5303.486085                                |
| 5.131517776                         | 15.27951486                               | 0.004771134                     | 23.99404905                         | 16000.97213                                |
| 5.368003347                         | 19.53369553                               | 0.004810141                     | 47.34582574                         | 57782.30445                                |
| 5.193524749                         | 14.74855541                               | 0.004640884                     | 26.41006165                         | 19434.98723                                |
| 4.786914546                         | 11.51985027                               | 0.008361262                     | 15.45351316                         | 7967.239334                                |
| 5.390755732                         | 16.21508175                               | 0.003519789                     | 37.63275203                         | 37252.9878                                 |
| 5.140781013                         | 14.57469846                               | 0.004826709                     | 25.74615526                         | 16854.61336                                |
| 5.059646843                         | 11.45083682                               | 0.006567365                     | 24.26599808                         | 14543.984                                  |
| 4.785949652                         | 11.01499209                               | 0.007644818                     | 15.08324019                         | 6910.234055                                |
| 5.042147911                         | 13.17341685                               | 0.007756073                     | 22.7306323                          | 17252.71187                                |
| 4.93008978                          | 18.73547321                               | 0.008015849                     | 26.5792259                          | 22543.38819                                |
| 5.163637871                         | 13.5555032                                | 0.00464644                      | 26.72813394                         | 17374.61888                                |
| 4.876644373                         | 11.15295158                               | 0.015012857                     | 19.70177871                         | 15631.89707                                |
| 4.945154569                         | 13.52729279                               | 0.006863785                     | 19.78637366                         | 11401.92725                                |
| 5.258867111                         | 14.37796856                               | 0.004091839                     | 30.22336617                         | 23045.44712                                |
| 5.209987729                         | 19.02790682                               | 0.005438252                     | 29.9033318                          | 28404.08188                                |
| 4.869806519                         | 12.2672012                                | 0.009523031                     | 17.50339122                         | 10882.601                                  |
| 4.939317506                         | 12.86429062                               | 0.006187505                     | 18.15435423                         | 10995.67834                                |
| 5.111094056                         | 13.06090175                               | 0.005154607                     | 23.57710509                         | 15783.14243                                |
| 4.766675066                         | 12.97867108                               | 0.00748569                      | 14.15547897                         | 5287.528749                                |
| 5.524563242                         | 18.49198598                               | 0.002707998                     | 42.04249934                         | 47967.73683                                |
| 5.224032222                         | 13.49932353                               | 0.003963048                     | 27.8506035                          | 18463.50107                                |
| 4.997157394                         | 15.96731637                               | 0.006593036                     | 25.99793398                         | 17879.3423                                 |
| 4.748477665                         | 12.6147941                                | 0.008809694                     | 20.11602116                         | 9790.547652                                |
| 5.174071234                         | 18.51304456                               | 0.004681242                     | 25.43315848                         | 19047.99857                                |

| log.sigma.4.0.mm.3D_glc_m_SumAverage | log.sigma.4.0.mm.3D_glc_m_lmc2 | log.sigma.4.0.mm.3D_glc_m_lmc1 | log.sigma.4.0.mm.3D_glc_m_DifferenceAverage | log.sigma.4.0.mm.3D_glc_m_Id |
|--------------------------------------|--------------------------------|--------------------------------|---------------------------------------------|------------------------------|
| 32.15299846                          | 0.831406554                    | -0.132483662                   | 4.505658896                                 | 0.302079452                  |
| 29.28922714                          | 0.959025735                    | -0.278573295                   | 4.711867277                                 | 0.285048611                  |
| 31.40752964                          | 0.86755501                     | -0.161457853                   | 4.649855831                                 | 0.291432606                  |
| 31.55428815                          | 0.963576542                    | -0.283489144                   | 5.086031607                                 | 0.267098707                  |
| 25.92484235                          | 0.834402925                    | -0.14003236                    | 3.860385762                                 | 0.319364052                  |
| 29.12436771                          | 0.967420589                    | -0.310117534                   | 4.23096184                                  | 0.298470571                  |
| 24.67165041                          | 0.818819626                    | -0.153338721                   | 2.470275123                                 | 0.485054249                  |
| 30.40883428                          | 0.740470523                    | -0.099287949                   | 3.720886544                                 | 0.358628161                  |
| 22.85224885                          | 0.775653233                    | -0.127376515                   | 3.00969387                                  | 0.413694132                  |
| 24.2540143                           | 0.834358737                    | -0.151452631                   | 3.223051685                                 | 0.355747509                  |
| 20.27195796                          | 0.764973869                    | -0.133059967                   | 2.335265343                                 | 0.438710193                  |
| 24.53387369                          | 0.78067592                     | -0.126714484                   | 2.714616344                                 | 0.433022676                  |
| 33.01209314                          | 0.874988465                    | -0.16628205                    | 4.513353038                                 | 0.30335361                   |
| 31.51732772                          | 0.908677441                    | -0.190972865                   | 5.01176923                                  | 0.268168119                  |
| 23.49000346                          | 0.799738408                    | -0.127591944                   | 3.786062054                                 | 0.349324578                  |
| 25.15991328                          | 0.858036236                    | -0.172368563                   | 3.223119585                                 | 0.430252046                  |
| 28.23832488                          | 0.780049977                    | -0.128181396                   | 2.570448101                                 | 0.401892881                  |
| 26.93025032                          | 0.947306779                    | -0.248063563                   | 4.731987059                                 | 0.284204927                  |
| 18.64484831                          | 0.774466093                    | -0.136678799                   | 2.292727261                                 | 0.439156157                  |
| 36.44901209                          | 0.737741298                    | -0.104428364                   | 3.198706004                                 | 0.379959638                  |
| 23.9894223                           | 0.805209586                    | -0.133557237                   | 3.426215935                                 | 0.351361229                  |
| 26.16585707                          | 0.896195036                    | -0.191263061                   | 3.886268663                                 | 0.317636072                  |
| 23.47076751                          | 0.887770331                    | -0.185774626                   | 3.614310386                                 | 0.340142875                  |
| 19.45426499                          | 0.796113637                    | -0.145579177                   | 2.110413437                                 | 0.490682169                  |
| 32.78397466                          | 0.891175327                    | -0.19092714                    | 3.822099463                                 | 0.370225923                  |
| 38.54409915                          | 0.820387271                    | -0.13750454                    | 3.627281399                                 | 0.355413594                  |
| 30.04033563                          | 0.798074729                    | -0.125600974                   | 4.125527623                                 | 0.316880577                  |
| 21.14818369                          | 0.764592458                    | -0.118268238                   | 2.884417027                                 | 0.390075956                  |
| 18.49545327                          | 0.92177634                     | -0.27065297                    | 2.281661247                                 | 0.43178062                   |
| 24.79802229                          | 0.799695493                    | -0.131612135                   | 3.130195871                                 | 0.365531896                  |
| 25.86859481                          | 0.775435186                    | -0.120979994                   | 3.319051517                                 | 0.373996803                  |
| 30.41272911                          | 0.855938038                    | -0.151714385                   | 4.62546851                                  | 0.28783019                   |
| 27.02568047                          | 0.815389772                    | -0.136670115                   | 3.295138246                                 | 0.374780209                  |
| 27.3803042                           | 0.838600241                    | -0.153882845                   | 3.073555611                                 | 0.408589199                  |
| 27.65545549                          | 0.747978819                    | -0.106829762                   | 3.201215537                                 | 0.381603784                  |
| 33.80500628                          | 0.789077776                    | -0.11627482                    | 4.314599518                                 | 0.316166929                  |
| 37.03801864                          | 0.840841083                    | -0.144980755                   | 5.156666603                                 | 0.275853977                  |
| 26.12353645                          | 0.879516988                    | -0.184245818                   | 3.07118835                                  | 0.454448449                  |
| 22.13292269                          | 0.847414088                    | -0.167325336                   | 3.111717034                                 | 0.355741723                  |
| 43.59227538                          | 0.806056283                    | -0.141091528                   | 2.482215159                                 | 0.454026392                  |
| 26.72444384                          | 0.831408201                    | -0.140863335                   | 3.748497345                                 | 0.329764703                  |
| 23.34092693                          | 0.763615712                    | -0.132206729                   | 1.980857291                                 | 0.498157232                  |
| 33.53458745                          | 0.841699604                    | -0.151312957                   | 4.782402052                                 | 0.294808136                  |
| 26.87912814                          | 0.83483939                     | -0.140684241                   | 3.877524256                                 | 0.321571168                  |
| 21.74797544                          | 0.843612312                    | -0.169102663                   | 2.432762484                                 | 0.459099431                  |
| 28.31213684                          | 0.788517964                    | -0.118249599                   | 3.972054737                                 | 0.330468768                  |
| 29.88467343                          | 0.760383545                    | -0.114313904                   | 2.874516178                                 | 0.410126001                  |
| 20.88562748                          | 0.857441994                    | -0.173791106                   | 2.914572032                                 | 0.37670162                   |
| 23.99249058                          | 0.935233933                    | -0.237767394                   | 3.718933457                                 | 0.321432926                  |
| 32.90431322                          | 0.925911036                    | -0.220075317                   | 4.370667388                                 | 0.294156272                  |
| 24.56447754                          | 0.830465607                    | -0.14228109                    | 3.68759286                                  | 0.342884757                  |
| 33.0948784                           | 0.783386703                    | -0.114540534                   | 3.843516607                                 | 0.327240778                  |
| 20.26489413                          | 0.806238172                    | -0.158889759                   | 1.844479454                                 | 0.539779329                  |
| 33.49175569                          | 0.795643606                    | -0.135863831                   | 2.97916281                                  | 0.386753302                  |
| 33.37023924                          | 0.915308507                    | -0.196989807                   | 5.032264104                                 | 0.270402416                  |
| 24.27704331                          | 0.844780093                    | -0.149132734                   | 3.871393429                                 | 0.32178687                   |
| 25.07521505                          | 0.78496773                     | -0.129005786                   | 3.103242677                                 | 0.397490319                  |
| 33.05897213                          | 0.75391462                     | -0.105174896                   | 3.961869108                                 | 0.319167488                  |
| 23.59793437                          | 0.825378619                    | -0.139803473                   | 3.78009281                                  | 0.323506127                  |
| 30.75362207                          | 0.820968612                    | -0.153942397                   | 2.312997153                                 | 0.493733425                  |
| 29.32143231                          | 0.80464346                     | -0.127648604                   | 3.609824953                                 | 0.344236845                  |
| 34.17906986                          | 0.799526622                    | -0.120379191                   | 4.050761811                                 | 0.318763964                  |
| 37.3515815                           | 0.750432393                    | -0.106106917                   | 3.747769528                                 | 0.353281767                  |
| 32.08211467                          | 0.822762795                    | -0.134483908                   | 3.665740804                                 | 0.336367198                  |
| 22.98183635                          | 0.827156053                    | -0.146350838                   | 3.399851118                                 | 0.34609881                   |
| 35.50253808                          | 0.743133606                    | -0.098125248                   | 4.076797062                                 | 0.311122357                  |
| 30.92015417                          | 0.916101152                    | -0.209998613                   | 4.343376676                                 | 0.29629067                   |
| 34.4378507                           | 0.736174389                    | -0.100500438                   | 3.578073935                                 | 0.345280908                  |
| 26.30489156                          | 0.778420812                    | -0.127005674                   | 2.567044108                                 | 0.423387067                  |
| 30.29479644                          | 0.784034015                    | -0.118622098                   | 3.426760202                                 | 0.349405397                  |
| 23.66303468                          | 0.895288299                    | -0.193126794                   | 3.973559808                                 | 0.314069496                  |
| 31.68698419                          | 0.766560991                    | -0.109506336                   | 3.753875634                                 | 0.364958602                  |
| 24.17715588                          | 0.81897478                     | -0.131088619                   | 4.290788787                                 | 0.308843461                  |
| 22.08137257                          | 0.819331452                    | -0.138698664                   | 3.361278224                                 | 0.349710917                  |
| 27.53016069                          | 0.826685455                    | -0.151334368                   | 2.764718197                                 | 0.431084418                  |
| 22.5786989                           | 0.79215323                     | -0.134026683                   | 2.919644281                                 | 0.372231417                  |
| 30.440438                            | 0.791777565                    | -0.12391763                    | 3.347054831                                 | 0.351015707                  |
| 38.46609303                          | 0.962495767                    | -0.281140275                   | 5.467622416                                 | 0.259875181                  |
| 29.43240358                          | 0.828248142                    | -0.140729409                   | 3.515058486                                 | 0.336966295                  |
| 23.00888569                          | 0.789804633                    | -0.130745332                   | 2.646930838                                 | 0.41532031                   |
| 31.95741899                          | 0.834435474                    | -0.134676532                   | 4.437053999                                 | 0.304732694                  |
| 29.13100374                          | 0.844993673                    | -0.152604911                   | 3.593710525                                 | 0.33271735                   |
| 22.87642327                          | 0.7953686041                   | -0.133668995                   | 3.56147637                                  | 0.372186759                  |
| 22.02706385                          | 0.747549256                    | -0.113790661                   | 2.775253955                                 | 0.391547409                  |
| 26.28251792                          | 0.815682179                    | -0.141488374                   | 3.004916729                                 | 0.403505058                  |
| 37.1212138                           | 0.883678206                    | -0.185870814                   | 3.925067701                                 | 0.325560139                  |
| 27.03454231                          | 0.8138148                      | -0.134513995                   | 3.676831337                                 | 0.338870849                  |
| 22.27016052                          | 0.840010506                    | -0.160309027                   | 2.589656525                                 | 0.465198972                  |
| 26.96512302                          | 0.781936195                    | -0.122055817                   | 3.113614629                                 | 0.381728251                  |
| 28.59499111                          | 0.832625006                    | -0.140046537                   | 3.769533602                                 | 0.325100708                  |
| 37.69883406                          | 0.886069111                    | -0.182696513                   | 3.670224423                                 | 0.346956447                  |
| 24.49841255                          | 0.813130385                    | -0.146944276                   | 2.663842144                                 | 0.425304509                  |
| 25.68613101                          | 0.753321671                    | -0.111500225                   | 2.841537656                                 | 0.38940984                   |
| 26.0320202                           | 0.785943215                    | -0.123028342                   | 3.18230768                                  | 0.371085211                  |
| 25.95734216                          | 0.740280255                    | -0.117550624                   | 2.566633626                                 | 0.401955473                  |
| 36.44513875                          | 0.805951724                    | -0.120287575                   | 4.773770138                                 | 0.285160783                  |
| 26.94443383                          | 0.773780079                    | -0.116005206                   | 3.658802685                                 | 0.333828621                  |
| 31.86599472                          | 0.929032315                    | -0.234192544                   | 3.794561015                                 | 0.324249456                  |
| 25.2295882                           | 0.917145008                    | -0.229793401                   | 3.546171031                                 | 0.339974112                  |
| 36.57780224                          | 0.719060232                    | -0.096200982                   | 3.607022816                                 | 0.352831777                  |

| log.sigma.4.0.mm.3D_glcm_ClusterTendency | log.sigma.4.0.mm.3D_firstorder_InterquartileRange | log.sigma.4.0.mm.3D_firstorder_Skewness | log.sigma.4.0.mm.3D_firstorder_Uniformity |
|------------------------------------------|---------------------------------------------------|-----------------------------------------|-------------------------------------------|
| 115.1533723                              | 211.7391624                                       | 0.353454744                             | 0.045769676                               |
| 120.1931222                              | 209.7981071                                       | -0.336187365                            | 0.050369989                               |
| 104.6963268                              | 225.0226803                                       | -0.153011987                            | 0.046650345                               |
| 132.5016283                              | 222.2261524                                       | -0.210876582                            | 0.044867096                               |
| 102.3352341                              | 177.8192863                                       | 0.01583027                              | 0.049804588                               |
| 120.0244684                              | 228.0665283                                       | -0.237239657                            | 0.048698859                               |
| 53.7937925                               | 98.56971741                                       | 0.692324181                             | 0.090349599                               |
| 84.68113999                              | 170.1745577                                       | 0.553150486                             | 0.055867929                               |
| 66.659548                                | 135.922431                                        | 0.757681611                             | 0.068692896                               |
| 64.04058604                              | 179.3789406                                       | 0.173420903                             | 0.059813166                               |
| 35.80993233                              | 104.9674082                                       | 0.433036257                             | 0.09230956                                |
| 54.37557854                              | 109.8364162                                       | 0.529091347                             | 0.076385063                               |
| 117.8309168                              | 245.8794632                                       | -0.457880441                            | 0.048845939                               |
| 123.9233342                              | 242.9623966                                       | -0.229074249                            | 0.043777246                               |
| 80.75475857                              | 176.2861052                                       | 0.683997267                             | 0.056875586                               |
| 79.33200812                              | 158.9812584                                       | 0.323315448                             | 0.065605474                               |
| 40.50312914                              | 132.5114861                                       | 0.110018788                             | 0.073820459                               |
| 129.5039525                              | 232.8814373                                       | -0.114037467                            | 0.046131958                               |
| 32.90044231                              | 99.03547096                                       | 0.292471283                             | 0.08940072                                |
| 69.01843357                              | 147.6985798                                       | 0.373983385                             | 0.061871865                               |
| 85.74056446                              | 206.1588669                                       | -0.090824927                            | 0.05293922                                |
| 87.11944309                              | 172.3822975                                       | -0.367665363                            | 0.058565297                               |
| 80.27841591                              | 176.934206                                        | -0.026392071                            | 0.05615935                                |
| 37.34845578                              | 82.5219574                                        | 0.51488133                              | 0.103655171                               |
| 99.11600983                              | 203.0811892                                       | 0.129922914                             | 0.052076149                               |
| 97.43394235                              | 197.9487877                                       | 0.529701912                             | 0.05318181                                |
| 89.83972344                              | 207.5400753                                       | 0.406560477                             | 0.051058064                               |
| 56.47704394                              | 150.9004745                                       | 0.316271172                             | 0.065236094                               |
| 32.36399963                              | 131.3914728                                       | 0.466342796                             | 0.092137362                               |
| 62.14756398                              | 163.0438919                                       | 0.182017887                             | 0.061643455                               |
| 78.53650031                              | 179.6629791                                       | 0.457329385                             | 0.056152343                               |
| 107.3529627                              | 242.4239931                                       | -0.324437115                            | 0.048664614                               |
| 83.65457027                              | 163.6153564                                       | 0.538498432                             | 0.057624364                               |
| 75.75671612                              | 170.2596016                                       | 0.3712264                               | 0.063712048                               |
| 71.53673636                              | 166.3305588                                       | 0.55643809                              | 0.060717773                               |
| 97.9865034                               | 209.9522209                                       | -0.314974809                            | 0.049334246                               |
| 124.957339                               | 228.4315519                                       | -0.503449943                            | 0.045256117                               |
| 83.61764896                              | 137.2924194                                       | 0.343250145                             | 0.077311292                               |
| 57.02279612                              | 155.69522                                         | -0.397224791                            | 0.070408163                               |
| 58.53713827                              | 115.5400696                                       | 0.517113897                             | 0.078423436                               |
| 93.74734971                              | 211.9669333                                       | 0.223416179                             | 0.050744041                               |
| 31.9821731                               | 75.47616196                                       | 0.658557763                             | 0.112765912                               |
| 122.6734065                              | 242.204464                                        | 0.033067175                             | 0.043574829                               |
| 99.08867696                              | 211.234416                                        | 0.30450179                              | 0.049788732                               |
| 50.35780075                              | 101.7668161                                       | 0.473532174                             | 0.088767422                               |
| 96.15145692                              | 204.0144653                                       | 0.260479875                             | 0.050130959                               |
| 58.43970276                              | 140.9276409                                       | 0.385906728                             | 0.067338088                               |
| 48.13646257                              | 134.6524582                                       | -0.260665772                            | 0.074418971                               |
| 95.62805529                              | 175.2865448                                       | 0.278964973                             | 0.054794252                               |
| 104.3150513                              | 190.3673878                                       | -0.418889176                            | 0.050933902                               |
| 87.17717506                              | 206.5166225                                       | 0.504665412                             | 0.054096038                               |
| 93.84234377                              | 193.6595459                                       | 0.307158222                             | 0.051259085                               |
| 32.76230282                              | 71.95311737                                       | 0.663215213                             | 0.119349963                               |
| 51.74627625                              | 143.0841236                                       | 0.181462513                             | 0.068831866                               |
| 141.7280737                              | 262.5405884                                       | -0.28581176                             | 0.04118283                                |
| 100.6290735                              | 215.3577862                                       | 0.261014898                             | 0.04882225                                |
| 71.24709379                              | 154.7359943                                       | 0.493787669                             | 0.061619797                               |
| 81.11155638                              | 226.6470146                                       | 0.029208074                             | 0.051579068                               |
| 73.73170559                              | 181.7206564                                       | -0.111228244                            | 0.056201893                               |
| 46.75154287                              | 103.5994186                                       | 0.38155124                              | 0.092586155                               |
| 74.29840277                              | 178.4845352                                       | 0.273173401                             | 0.056492291                               |
| 104.6319847                              | 205.0227127                                       | 0.113955966                             | 0.047817683                               |
| 96.72198311                              | 194.035677                                        | 0.242263086                             | 0.051373243                               |
| 99.67681321                              | 179.6898785                                       | 0.054701681                             | 0.051373754                               |
| 57.64708216                              | 168.5650406                                       | -0.015171575                            | 0.060111841                               |
| 90.45705942                              | 198.7907257                                       | 0.071914724                             | 0.050103471                               |
| 94.2950421                               | 194.5868744                                       | -0.535070398                            | 0.055279187                               |
| 80.06427271                              | 171.244072                                        | 0.482509521                             | 0.057167349                               |
| 56.446931                                | 143.4276457                                       | 0.413430742                             | 0.069777994                               |
| 76.32031143                              | 173.400219                                        | -0.097087697                            | 0.056318516                               |
| 84.83435213                              | 217.8057327                                       | -0.048338701                            | 0.053680019                               |
| 81.25949346                              | 159.3252869                                       | 0.263048288                             | 0.059830206                               |
| 105.0524706                              | 251.6216774                                       | 0.219807607                             | 0.047921559                               |
| 65.12986142                              | 183.3742018                                       | 0.300708509                             | 0.058504155                               |
| 68.55632509                              | 110.9077587                                       | 0.816887118                             | 0.078864775                               |
| 46.84217922                              | 144.7583332                                       | -0.091616651                            | 0.069835438                               |
| 75.80821792                              | 183.447403                                        | -0.046271479                            | 0.055886645                               |
| 142.6764503                              | 218.9370365                                       | -0.770833648                            | 0.050810417                               |
| 83.9068457                               | 170.0372543                                       | -0.03764449                             | 0.055039107                               |
| 47.88851871                              | 129.3958626                                       | 0.32123329                              | 0.073817284                               |
| 113.7147489                              | 208.4129791                                       | 0.373590919                             | 0.046505628                               |
| 81.91500187                              | 187.4762726                                       | -0.325519716                            | 0.056320316                               |
| 73.44142716                              | 191.223382                                        | 0.241588158                             | 0.057978033                               |
| 47.06214737                              | 131.5185919                                       | 0.274966895                             | 0.072081115                               |
| 72.10358471                              | 138.39674                                         | 0.486577822                             | 0.06628247                                |
| 79.80185466                              | 151.2225418                                       | -1.082658298                            | 0.077255365                               |
| 81.99361582                              | 188.2165232                                       | 0.108792022                             | 0.05500145                                |
| 62.99657347                              | 110.4098492                                       | 0.627132486                             | 0.080444197                               |
| 59.92150772                              | 144.5872002                                       | 0.114718673                             | 0.065746504                               |
| 94.28724097                              | 203.5774155                                       | 0.104267799                             | 0.051086617                               |
| 94.18842567                              | 176.5250072                                       | -0.172397572                            | 0.05430868                                |
| 55.2357362                               | 121.027071                                        | 0.319058681                             | 0.074016569                               |
| 57.81306687                              | 151.5788612                                       | 0.325352022                             | 0.066045261                               |
| 74.85777138                              | 169.8689556                                       | 0.347994599                             | 0.058992586                               |
| 45.62764011                              | 144.0855064                                       | 0.128081795                             | 0.070747566                               |
| 132.0984129                              | 255.3036079                                       | 0.068692483                             | 0.041750301                               |
| 87.8943749                               | 209.4644222                                       | 0.080240179                             | 0.051045656                               |
| 79.10419019                              | 181.0638156                                       | -0.619571775                            | 0.062560606                               |
| 60.19997492                              | 142.8048754                                       | -0.803707144                            | 0.077940521                               |
| 79.27411578                              | 175.5550804                                       | 0.066215157                             | 0.054343646                               |

| log.sigma.4.0.mm.3D_firstorder_MeanAbsoluteDeviation | log.sigma.4.0.mm.3D_firstorder_Energy | log.sigma.4.0.mm.3D_firstorder_RobustMeanAbsoluteDeviation | log.sigma.4.0.mm.3D_firstorder_Median |
|------------------------------------------------------|---------------------------------------|------------------------------------------------------------|---------------------------------------|
| 126.2691393                                          | 40287174.01                           | 89.17963873                                                | -70.54283524                          |
| 124.8529101                                          | 9034188.572                           | 88.49629375                                                | -24.22523689                          |
| 124.7871685                                          | 20221048.38                           | 93.15176135                                                | -1.46702835                           |
| 134.1437206                                          | 9459338.446                           | 93.84774923                                                | -29.12835598                          |
| 118.1885181                                          | 28608672.82                           | 87.95627473                                                | 7.519221306                           |
| 127.5207428                                          | 5716223.215                           | 94.66862727                                                | 22.73516178                           |
| 74.12432004                                          | 112185136.1                           | 45.22022495                                                | -8.418064117                          |
| 104.0706152                                          | 112458540.7                           | 71.13353829                                                | -34.93615341                          |
| 89.11285264                                          | 59308129.9                            | 59.41400903                                                | -31.15486813                          |
| 97.57082682                                          | 10937184.94                           | 72.57264581                                                | 22.3481636                            |
| 65.07962161                                          | 11248648.13                           | 43.73417168                                                | 5.614125967                           |
| 78.91716595                                          | 37772346.81                           | 50.48050971                                                | -8.296096802                          |
| 132.0308448                                          | 21013322.21                           | 100.08556                                                  | -2.262992859                          |
| 136.3873649                                          | 22497362.45                           | 102.7168306                                                | -68.95158768                          |
| 104.6006556                                          | 32800063.74                           | 73.78851449                                                | -78.46102905                          |
| 96.82659755                                          | 90277808.2                            | 66.33293335                                                | -4.300155401                          |
| 75.796338                                            | 7673167.701                           | 54.41149143                                                | -3.094323874                          |
| 133.0512212                                          | 14463702.54                           | 97.05547993                                                | -83.68445587                          |
| 64.66733145                                          | 8229627.958                           | 42.64622794                                                | -26.50182438                          |
| 93.35322517                                          | 139898293.9                           | 61.84962208                                                | 14.53067493                           |
| 110.8622581                                          | 36259212.04                           | 83.4079437                                                 | 14.9090414                            |
| 105.8337304                                          | 8630996.728                           | 74.3896758                                                 | 2.801261067                           |
| 102.661261                                           | 9481296.288                           | 72.70717708                                                | -26.22268963                          |
| 61.37004278                                          | 26510683.16                           | 37.58395624                                                | -13.63275528                          |
| 117.020166                                           | 28149184.54                           | 84.00185368                                                | -45.09950829                          |
| 115.5547923                                          | 52714696.8                            | 81.28771486                                                | -23.65532017                          |
| 115.7140936                                          | 45587138.11                           | 84.43097567                                                | -71.16275787                          |
| 86.96873122                                          | 29435599.13                           | 62.00917449                                                | -40.5153389                           |
| 67.536369                                            | 1323771.626                           | 48.60884999                                                | 34.84669113                           |
| 92.07601349                                          | 21568905.44                           | 66.06634392                                                | -16.05925274                          |
| 103.158589                                           | 68821121.24                           | 74.82574605                                                | -49.42379761                          |
| 126.4461508                                          | 23931382.91                           | 97.16456794                                                | -70.18219757                          |
| 101.6408502                                          | 39824555.69                           | 69.79092431                                                | -36.40133286                          |
| 95.07169682                                          | 34489432.21                           | 69.01720706                                                | -17.61371422                          |
| 97.18717558                                          | 76501997.38                           | 68.16667528                                                | -29.1986351                           |
| 116.5743384                                          | 40919515.68                           | 85.08172101                                                | -20.14752197                          |
| 132.4148837                                          | 48514961.82                           | 94.51766047                                                | -49.24699402                          |
| 95.45550184                                          | 94198244.16                           | 63.14513739                                                | 0.039333027                           |
| 85.23918461                                          | 7098976.985                           | 61.74387992                                                | -26.25557899                          |
| 76.84467799                                          | 102320450.7                           | 49.52076547                                                | -12.82324982                          |
| 115.9979415                                          | 31718664.29                           | 87.07904171                                                | -72.80480957                          |
| 55.2441619                                           | 34234054.28                           | 33.10442079                                                | 1.83191818                            |
| 131.4510087                                          | 61077857.63                           | 96.77079115                                                | -8.402295113                          |
| 115.6741169                                          | 30397668.36                           | 85.42799551                                                | -48.97872734                          |
| 72.26459608                                          | 15809175.65                           | 43.42295576                                                | -8.370322227                          |
| 114.8043924                                          | 46431758.2                            | 84.10033581                                                | -18.63955688                          |
| 85.26827357                                          | 62530566.51                           | 59.28307547                                                | -9.810009003                          |
| 80.38500945                                          | 5651615.551                           | 56.32950155                                                | -24.32400513                          |
| 107.8434885                                          | 7073198.88                            | 75.53669747                                                | 5.137577057                           |
| 114.5775813                                          | 9242742.861                           | 80.81186527                                                | 2.74335146                            |
| 114.3772379                                          | 28497707.35                           | 85.48346247                                                | -85.5966568                           |
| 111.9510425                                          | 56378209.49                           | 79.20232293                                                | -17.48047447                          |
| 55.83610837                                          | 51924264.34                           | 32.50369446                                                | -4.732750177                          |
| 83.61384893                                          | 18561851.17                           | 58.65889092                                                | -22.26714134                          |
| 143.1515653                                          | 19040233.75                           | 106.385764                                                 | 17.58605766                           |
| 119.3548532                                          | 24654169.9                            | 88.85435958                                                | -23.23920441                          |
| 94.42159216                                          | 57615626.57                           | 66.39558904                                                | -24.71305847                          |
| 116.3673808                                          | 41710114.72                           | 91.74730137                                                | -48.20438766                          |
| 103.7771573                                          | 15992339.2                            | 77.03762143                                                | -61.04524612                          |
| 69.16804062                                          | 99645188.27                           | 43.01631371                                                | 0.641360581                           |
| 100.7958669                                          | 21014669.62                           | 71.98592436                                                | -25.50425911                          |
| 117.8705582                                          | 54068625.6                            | 83.37608454                                                | 15.37764072                           |
| 113.0852957                                          | 162519332.2                           | 80.09327627                                                | -6.160000086                          |
| 110.6288565                                          | 40828896.66                           | 76.12514581                                                | 0.396014899                           |
| 93.56182002                                          | 9032090.453                           | 67.43179598                                                | -16.72692299                          |
| 113.8099008                                          | 67432826.45                           | 81.92869389                                                | -4.811909676                          |
| 114.416898                                           | 11974105.25                           | 83.66160514                                                | -73.55862427                          |
| 102.5969174                                          | 88546608.57                           | 71.35209663                                                | -42.7753558                           |
| 83.34552946                                          | 81452576.25                           | 59.34369941                                                | -9.362093449                          |
| 101.0304887                                          | 33284264.97                           | 72.52205536                                                | 26.53838253                           |
| 115.1985652                                          | 9850034.434                           | 89.70208422                                                | -42.9766655                           |
| 101.5162314                                          | 85484521.9                            | 69.70099228                                                | -7.706257343                          |
| 128.1366645                                          | 32727651.53                           | 100.1780293                                                | -53.84558105                          |
| 99.23785574                                          | 16223751.24                           | 73.47569404                                                | -61.05987358                          |
| 80.64145812                                          | 51504029.47                           | 49.43183767                                                | -16.41531277                          |
| 80.90990717                                          | 8729663.359                           | 59.90890126                                                | 5.64717555                            |
| 101.9104175                                          | 34347831.97                           | 74.30765829                                                | -1.767778993                          |
| 136.745728                                           | 10975981.47                           | 93.21395914                                                | -28.97210503                          |
| 102.9977021                                          | 23404916.76                           | 72.18505074                                                | 41.73491287                           |
| 77.31091413                                          | 20709368.06                           | 53.34541138                                                | -41.72647858                          |
| 124.5793861                                          | 38963447.78                           | 87.58719895                                                | -74.12563705                          |
| 104.9042488                                          | 13510281.83                           | 76.71658778                                                | -0.682727396                          |
| 103.7950473                                          | 39375873.66                           | 77.32051114                                                | -40.12779808                          |
| 78.92960981                                          | 23606637.54                           | 54.92479328                                                | -56.08880234                          |
| 90.19027183                                          | 38037559.08                           | 58.86555006                                                | -15.55037117                          |
| 102.8462284                                          | 9730540.349                           | 67.30236259                                                | 9.048331261                           |
| 104.5411117                                          | 23024172.04                           | 76.14776381                                                | -46.22221756                          |
| 82.05945369                                          | 48427387.03                           | 51.02009585                                                | -7.885185242                          |
| 88.42020553                                          | 22007439.64                           | 60.7999397                                                 | -30.04524994                          |
| 112.8258563                                          | 25910977.98                           | 82.20517955                                                | 7.226892471                           |
| 108.8675619                                          | 15680040.55                           | 74.39577655                                                | 17.30229664                           |
| 79.60601353                                          | 29100842.97                           | 52.06960925                                                | -22.73117828                          |
| 86.17871301                                          | 51724251.74                           | 62.24810167                                                | -17.83931351                          |
| 96.68676788                                          | 50070675.5                            | 68.91752161                                                | 2.50009799                            |
| 79.51045685                                          | 30734155.92                           | 58.52101188                                                | -8.789875031                          |
| 138.5353886                                          | 66845060.69                           | 103.5877759                                                | -11.64147758                          |
| 111.9887357                                          | 43712831.81                           | 84.62511211                                                | -0.430930451                          |
| 102.0278744                                          | 7709600.919                           | 73.07626701                                                | -81.69120789                          |
| 87.65662342                                          | 3315912.836                           | 61.2803729                                                 | 2.989732504                           |
| 103.8942316                                          | 153735319.3                           | 72.92696784                                                | 21.51839542                           |

| log.sigma.4.0.mm.3D_firstorder_TotalEnergy | log.sigma.4.0.mm.3D_firstorder_Maximum | log.sigma.4.0.mm.3D_firstorder_RootMeanSquared | log.sigma.4.0.mm.3D_firstorder_90Percentile | log.sigma.4.0.mm.3D_firstorder_Minimum |
|--------------------------------------------|----------------------------------------|------------------------------------------------|---------------------------------------------|----------------------------------------|
| 1087753698                                 | 424.0751648                            | 167.0320478                                    | 171.5050461                                 | -434.9532776                           |
| 243923091.4                                | 281.1963196                            | 161.354038                                     | 136.5735443                                 | -422.7549744                           |
| 545968306.3                                | 369.1703491                            | 150.5633978                                    | 181.3778275                                 | -394.4076538                           |
| 255402138                                  | 317.5029602                            | 171.3966962                                    | 179.6745117                                 | -432.9391479                           |
| 772434166.2                                | 393.3486938                            | 142.3919209                                    | 175.8167267                                 | -300.213623                            |
| 154338026.8                                | 299.4476013                            | 153.6904587                                    | 210.7684891                                 | -349.7799072                           |
| 302898675                                  | 614.6448975                            | 103.173451                                     | 135.574118                                  | -289.027771                            |
| 3036380600                                 | 440.7656555                            | 136.1361411                                    | 147.7946991                                 | -395.0310669                           |
| 1601319507                                 | 389.0384827                            | 117.964245                                     | 146.9007233                                 | -291.2433777                           |
| 295303993.2                                | 305.9439087                            | 120.3592026                                    | 193.9697174                                 | -252.1726837                           |
| 303713499.6                                | 324.8802795                            | 85.02475118                                    | 133.6639328                                 | -208.4039764                           |
| 1019853364                                 | 443.2417603                            | 105.2933437                                    | 138.2622253                                 | -286.2835083                           |
| 567359699.8                                | 305.741394                             | 160.9670307                                    | 141.4339752                                 | -432.323822                            |
| 607428786.3                                | 306.2570496                            | 186.9058389                                    | 107.4431046                                 | -479.7702637                           |
| 885601721.1                                | 484.4734497                            | 144.310212                                     | 120.9867325                                 | -325.7639465                           |
| 2437500821                                 | 433.5355225                            | 125.1710445                                    | 188.2398132                                 | -280.8027039                           |
| 207175527.9                                | 233.2618561                            | 93.21954809                                    | 122.3572998                                 | -204.4493561                           |
| 390519968.5                                | 327.962738                             | 188.0520563                                    | 104.1160034                                 | -429.7589722                           |
| 222199954.9                                | 233.6549683                            | 86.73241519                                    | 85.76090012                                 | -225.2739258                           |
| 3777253935                                 | 530.2390747                            | 123.428064                                     | 171.1732239                                 | -403.267334                            |
| 978988725.1                                | 321.8068848                            | 132.0950092                                    | 166.5154404                                 | -283.2482605                           |
| 233036911.6                                | 263.7513123                            | 131.9136198                                    | 144.5009155                                 | -344.3067627                           |
| 255994999.8                                | 330.6473694                            | 130.3517181                                    | 129.952034                                  | -322.0176392                           |
| 715788445.2                                | 320.6708374                            | 85.84998838                                    | 93.03680267                                 | -244.1469421                           |
| 760027982.6                                | 357.6663513                            | 151.4027368                                    | 164.0606201                                 | -444.6971436                           |
| 1423296814                                 | 458.2610168                            | 143.6102479                                    | 216.1515274                                 | -457.1113586                           |
| 1230852729                                 | 447.4501648                            | 150.8246429                                    | 136.1496521                                 | -402.2316895                           |
| 794761176.5                                | 316.8258667                            | 114.3025302                                    | 105.385495                                  | -297.883606                            |
| 35741833.9                                 | 281.0547485                            | 95.22042294                                    | 163.4387665                                 | -150.9983978                           |
| 582360446.8                                | 363.4380188                            | 115.7447004                                    | 123.0717819                                 | -307.6620789                           |
| 1858170274                                 | 392.8161926                            | 131.0215835                                    | 146.8299072                                 | -333.8278809                           |
| 646147338.5                                | 211.5415955                            | 174.2692608                                    | 90.84296112                                 | -469.4194946                           |
| 1075263004                                 | 514.6450806                            | 130.5966471                                    | 158.1271057                                 | -329.7631836                           |
| 931214669.7                                | 419.5223999                            | 119.5045538                                    | 154.2543549                                 | -342.9489136                           |
| 2065553929                                 | 437.7695923                            | 122.0817525                                    | 159.1435699                                 | -334.8326721                           |
| 1104826923                                 | 317.4692078                            | 145.2701343                                    | 148.1116425                                 | -442.041748                            |
| 1309903969                                 | 268.3015137                            | 179.1273708                                    | 117.8965088                                 | -548.0222778                           |
| 2543352592                                 | 487.3226929                            | 127.2103959                                    | 176.9825897                                 | -313.7612305                           |
| 191672378.6                                | 201.6334686                            | 112.5910503                                    | 80.38534546                                 | -314.5253296                           |
| 2762652170                                 | 495.8433533                            | 104.0720872                                    | 113.9235367                                 | -525.2261963                           |
| 856403935.8                                | 391.8666382                            | 153.852673                                     | 117.4343811                                 | -388.7819214                           |
| 924319465.6                                | 430.131897                             | 77.68927281                                    | 102.1771126                                 | -270.8396606                           |
| 1649102156                                 | 403.8842773                            | 158.9328786                                    | 196.5080521                                 | -409.6533203                           |
| 820737045.6                                | 385.601532                             | 146.3106582                                    | 148.5146454                                 | -356.1316528                           |
| 426847742.6                                | 400.9717102                            | 100.7975128                                    | 104.6062965                                 | -265.3331299                           |
| 1253657471                                 | 400.1410217                            | 139.0629649                                    | 191.1786194                                 | -338.9881287                           |
| 1688325296                                 | 419.257782                             | 108.1007498                                    | 130.0346375                                 | -366.390625                            |
| 152593619.9                                | 230.746933                             | 107.2866191                                    | 74.13272095                                 | -292.4429932                           |
| 190976369.8                                | 385.4519958                            | 134.4991551                                    | 179.7395172                                 | -285.2260742                           |
| 249554057.2                                | 299.4099731                            | 142.9984131                                    | 165.6198959                                 | -410.3894958                           |
| 769438098.5                                | 358.5541687                            | 148.8043708                                    | 139.0371277                                 | -352.5092163                           |
| 1522211656                                 | 495.4399414                            | 142.2797324                                    | 221.6429321                                 | -366.8484497                           |
| 1401955137                                 | 406.6934814                            | 80.68496287                                    | 83.72771835                                 | -244.0231781                           |
| 501169981.6                                | 336.8690491                            | 106.3222275                                    | 113.661676                                  | -406.6059265                           |
| 514086311.2                                | 387.9840393                            | 172.0801007                                    | 221.5625763                                 | -410.3495178                           |
| 665662587.4                                | 399.4164429                            | 144.7909879                                    | 169.2540436                                 | -315.0031738                           |
| 1555621917                                 | 407.8511658                            | 119.791877                                     | 148.9715149                                 | -311.8688965                           |
| 1126173097                                 | 317.2944031                            | 142.0530144                                    | 133.9416656                                 | -428.2269897                           |
| 431793158.4                                | 240.3786926                            | 144.7750513                                    | 83.52312775                                 | -374.7554016                           |
| 2690420083                                 | 425.7626953                            | 95.6432696                                     | 111.6534729                                 | -350.1290894                           |
| 567396079.8                                | 391.3566589                            | 125.7473359                                    | 144.7386475                                 | -353.5632019                           |
| 1459852891                                 | 488.4878845                            | 148.1031185                                    | 213.1228485                                 | -394.2730713                           |
| 4388021969                                 | 554.4678345                            | 140.4905405                                    | 205.887439                                  | -440.5011902                           |
| 1102380210                                 | 484.3884888                            | 139.568748                                     | 181.2188492                                 | -383.5427246                           |
| 243866442.2                                | 317.1088867                            | 115.5047394                                    | 136.2653564                                 | -287.5032959                           |
| 1820686314                                 | 472.8664246                            | 140.3974257                                    | 163.0159149                                 | -441.2908936                           |
| 323300841.7                                | 149.615097                             | 171.7348831                                    | 56.59980583                                 | -479.4120789                           |
| 2390758431                                 | 464.0297852                            | 131.9594471                                    | 153.5841492                                 | -429.6397095                           |
| 2199219559                                 | 409.2507324                            | 104.157436                                     | 126.6561722                                 | -319.2648926                           |
| 898675154.1                                | 343.0302734                            | 125.1820989                                    | 173.1085419                                 | -347.2637939                           |
| 265950929.7                                | 256.6573181                            | 141.4934458                                    | 128.8678726                                 | -333.0393066                           |
| 2308082091                                 | 454.6965942                            | 131.0042764                                    | 162.953949                                  | -375.6911621                           |
| 883646591.2                                | 386.7478943                            | 156.5729695                                    | 150.8372223                                 | -347.765625                            |
| 438041283.6                                | 335.4458618                            | 130.6814175                                    | 108.9028366                                 | -307.6215515                           |
| 1390608796                                 | 538.3688965                            | 112.2994779                                    | 133.6717941                                 | -332.0502319                           |
| 235700910.7                                | 249.0591278                            | 97.5163433                                     | 127.1969009                                 | -264.7533264                           |
| 927391463.2                                | 416.1325378                            | 124.6957946                                    | 147.7555481                                 | -372.1721802                           |
| 296351499.8                                | 214.534729                             | 184.3403558                                    | 105.0092072                                 | -574.3199463                           |
| 631932752.4                                | 386.8916931                            | 133.4107034                                    | 205.6484497                                 | -304.5531616                           |
| 559152937.6                                | 376.7010803                            | 107.2623162                                    | 83.88232956                                 | -321.6419983                           |
| 1052013090                                 | 424.0751648                            | 166.4700191                                    | 169.9408722                                 | -431.5130615                           |
| 364777609.5                                | 264.9568176                            | 127.8916471                                    | 137.7919159                                 | -351.2741394                           |
| 1063148589                                 | 345.6013184                            | 131.358228                                     | 130.4262192                                 | -321.905426                            |
| 637379213.6                                | 320.5197449                            | 111.6713481                                    | 86.82641144                                 | -310.2997131                           |
| 1027014095                                 | 380.2282104                            | 138.3644823                                    | 155.4384277                                 | -303.4093933                           |
| 262724589.4                                | 250.0029602                            | 135.3696227                                    | 88.74176788                                 | -485.02948                             |
| 621652645.2                                | 317.4883423                            | 132.6747075                                    | 127.9169403                                 | -372.0228882                           |
| 1307539450                                 | 411.2489929                            | 112.3585741                                    | 149.824707                                  | -256.9203186                           |
| 594200870.3                                | 391.5532227                            | 113.7450754                                    | 130.5646515                                 | -341.4146118                           |
| 699596405.6                                | 395.6189575                            | 137.6758116                                    | 175.7433777                                 | -345.2795715                           |
| 423361095                                  | 324.595459                             | 139.6514877                                    | 215.475322                                  | -445.3809204                           |
| 785722760.3                                | 335.8049011                            | 107.2064547                                    | 111.5715668                                 | -324.6665039                           |
| 1396554797                                 | 458.5746765                            | 107.199461                                     | 124.2121964                                 | -312.0631409                           |
| 1351908238                                 | 450.357666                             | 120.5408053                                    | 178.9434357                                 | -292.561554                            |
| 829822209.8                                | 291.6941223                            | 96.40366561                                    | 125.4046158                                 | -302.9229126                           |
| 1804816639                                 | 520.9736938                            | 167.4486056                                    | 191.3164322                                 | -463.7131958                           |
| 1180246459                                 | 378.8035278                            | 133.5193588                                    | 180.3897141                                 | -308.7012024                           |
| 208159224.8                                | 162.7716827                            | 156.9436614                                    | 46.27994461                                 | -476.3115234                           |
| 89529646.56                                | 178.353363                             | 111.2331295                                    | 86.69478302                                 | -329.2181396                           |
| 4150853622                                 | 425.9917908                            | 131.9939658                                    | 190.5977615                                 | -408.8885498                           |

| log.sigma.4.0.mm.3D_firstorder_Entropy | log.sigma.4.0.mm.3D_firstorder_StandardDeviation | log.sigma.4.0.mm.3D_firstorder_Range | log.sigma.4.0.mm.3D_firstorder_Variance | log.sigma.4.0.mm.3D_firstorder_10Percentile |
|----------------------------------------|--------------------------------------------------|--------------------------------------|-----------------------------------------|---------------------------------------------|
| 4.647613207                            | 157.0106001                                      | 859.0284424                          | 24652.32855                             | -248.6927933                                |
| 4.53763855                             | 154.4589268                                      | 703.9512939                          | 23857.56008                             | -273.9466125                                |
| 4.555985779                            | 150.0590655                                      | 763.5780029                          | 22517.72315                             | -224.0689026                                |
| 4.67474249                             | 165.5670619                                      | 750.4421082                          | 27412.45199                             | -279.9311615                                |
| 4.475564697                            | 142.3508635                                      | 693.5623169                          | 20263.76834                             | -205.816391                                 |
| 4.466139759                            | 152.8090046                                      | 649.2275085                          | 23350.5919                              | -192.8320587                                |
| 3.929780776                            | 102.9692419                                      | 903.6726685                          | 10602.66478                             | -131.5880737                                |
| 4.407380356                            | 133.0908167                                      | 835.7967224                          | 17713.16548                             | -189.5464432                                |
| 4.149106229                            | 116.192701                                       | 680.2818604                          | 13500.74378                             | -156.4773483                                |
| 4.210238251                            | 117.5142564                                      | 558.1165924                          | 13809.60046                             | -121.5189377                                |
| 3.73142506                             | 83.4124486                                       | 533.284256                           | 6957.636582                             | -86.92258072                                |
| 4.04427603                             | 105.2732306                                      | 729.5252686                          | 11082.45309                             | -137.0095245                                |
| 4.53059653                             | 156.1724023                                      | 738.0652161                          | 24389.81924                             | -278.4882507                                |
| 4.651295946                            | 162.2285482                                      | 786.0273132                          | 26318.10184                             | -335.3105835                                |
| 4.345422635                            | 131.151613                                       | 810.2373962                          | 17200.74559                             | -214.5503754                                |
| 4.24170744                             | 125.1605188                                      | 714.3382263                          | 15665.15547                             | -164.2486755                                |
| 3.918466342                            | 93.21092693                                      | 437.7112122                          | 8688.276899                             | -129.9381744                                |
| 4.626399278                            | 161.8744116                                      | 757.7217102                          | 26203.32512                             | -336.430127                                 |
| 3.747316315                            | 83.62023602                                      | 458.928894                           | 6992.343872                             | -129.66577                                  |
| 4.304799433                            | 121.9003996                                      | 933.5064087                          | 14859.70742                             | -132.7194672                                |
| 4.366313408                            | 132.0814148                                      | 605.0551453                          | 17445.50014                             | -192.9800461                                |
| 4.323334773                            | 131.2574715                                      | 608.058075                           | 17228.52383                             | -211.227356                                 |
| 4.336808196                            | 127.2894384                                      | 652.6650085                          | 16202.60113                             | -197.8628937                                |
| 3.696394226                            | 84.59765249                                      | 564.8177795                          | 7156.762807                             | -120.2349289                                |
| 4.500055638                            | 144.8379132                                      | 802.3634949                          | 20978.0211                              | -221.156189                                 |
| 4.483293223                            | 143.5895867                                      | 915.3723755                          | 20617.96942                             | -160.39991                                  |
| 4.490052035                            | 141.2594351                                      | 849.6818542                          | 19954.22801                             | -220.4160934                                |
| 4.124596483                            | 107.734536                                       | 614.7094727                          | 11606.73024                             | -174.589447                                 |
| 3.628879542                            | 82.99531017                                      | 432.0531464                          | 6888.22151                              | -47.00176239                                |
| 4.209806612                            | 114.179985                                       | 671.1000977                          | 13037.06897                             | -170.1938812                                |
| 4.320963187                            | 126.330304                                       | 726.6440735                          | 15959.34572                             | -189.8854401                                |
| 4.492486964                            | 149.0839239                                      | 680.9610901                          | 22226.01637                             | -299.9802765                                |
| 4.360893002                            | 129.0272879                                      | 844.4082642                          | 16648.04103                             | -170.9011627                                |
| 4.193849382                            | 117.9384553                                      | 762.4713135                          | 13909.47923                             | -164.5681396                                |
| 4.267460867                            | 121.4304995                                      | 772.6022644                          | 14745.36622                             | -154.3807068                                |
| 4.501692323                            | 142.5376382                                      | 759.5109558                          | 20316.97829                             | -228.026651                                 |
| 4.656127243                            | 163.0449678                                      | 816.3237915                          | 26583.66151                             | -312.7703247                                |
| 4.190733061                            | 126.9418874                                      | 801.0839233                          | 16114.24278                             | -176.8843994                                |
| 4.030761765                            | 104.4830123                                      | 516.1587982                          | 10916.69985                             | -193.7532471                                |
| 4.025802228                            | 103.0488867                                      | 1021.06955                           | 10619.07304                             | -136.9141724                                |
| 4.457957959                            | 138.0725677                                      | 780.6485596                          | 19064.03395                             | -241.2820129                                |
| 3.570534083                            | 77.41798191                                      | 700.9715576                          | 5993.543923                             | -81.06867752                                |
| 4.68001719                             | 158.7521324                                      | 813.5375977                          | 25202.23954                             | -212.3502747                                |
| 4.479798055                            | 140.2014981                                      | 741.7331848                          | 19656.46006                             | -221.1707199                                |
| 3.918324246                            | 100.470201                                       | 666.3048401                          | 10094.26129                             | -140.5387497                                |
| 4.473968888                            | 139.001855                                       | 739.1291504                          | 19321.51569                             | -181.1162262                                |
| 4.125354939                            | 107.7690472                                      | 785.648407                           | 11614.16753                             | -146.0289154                                |
| 3.975204432                            | 99.9711135                                       | 523.1899261                          | 9994.223535                             | -183.6386414                                |
| 4.395745048                            | 134.4219287                                      | 670.6780701                          | 18069.25492                             | -174.7398071                                |
| 4.475448435                            | 142.6838022                                      | 709.799469                           | 20358.66741                             | -204.8487442                                |
| 4.391564283                            | 136.7591388                                      | 711.063385                           | 18703.06204                             | -217.5810303                                |
| 4.499181361                            | 139.2028593                                      | 862.2883911                          | 19377.43604                             | -137.4630096                                |
| 3.563347733                            | 80.34298676                                      | 650.7166595                          | 6454.995522                             | -109.982811                                 |
| 4.097560415                            | 104.7270124                                      | 743.4749756                          | 10967.74712                             | -143.0901169                                |
| 4.716447697                            | 172.0692104                                      | 798.3335571                          | 29607.81316                             | -249.1883575                                |
| 4.479553162                            | 143.1881528                                      | 714.4196167                          | 20502.84709                             | -207.1662216                                |
| 4.235029192                            | 118.4238317                                      | 719.7200623                          | 14024.20392                             | -164.1294708                                |
| 4.373402762                            | 134.9460778                                      | 745.5213928                          | 18210.4439                              | -224.297525                                 |
| 4.301261596                            | 124.0849558                                      | 615.1340942                          | 15397.07626                             | -241.8962433                                |
| 3.883681707                            | 95.6004595                                       | 775.8917847                          | 9139.447856                             | -122.0563232                                |
| 4.338342137                            | 124.7013569                                      | 744.9198608                          | 15550.4284                              | -175.9829193                                |
| 4.582773574                            | 147.1177819                                      | 882.7609558                          | 21643.64176                             | -179.7519623                                |
| 4.505581799                            | 140.0220005                                      | 994.9690247                          | 19606.16063                             | -159.6084473                                |
| 4.507389672                            | 139.558492                                       | 867.9312134                          | 19476.56073                             | -181.9848557                                |
| 4.209095533                            | 114.426347                                       | 604.6121826                          | 13093.38888                             | -165.0639954                                |
| 4.518041387                            | 140.0619638                                      | 914.1573181                          | 19617.3537                              | -192.1325073                                |
| 4.369569746                            | 138.6121387                                      | 629.0271759                          | 19213.32501                             | -307.3003845                                |
| 4.37761624                             | 129.1830753                                      | 893.6694946                          | 16688.26696                             | -175.8630341                                |
| 4.062610893                            | 103.7941463                                      | 728.515625                           | 10773.2248                              | -135.8900177                                |
| 4.320788209                            | 123.8170186                                      | 690.2940674                          | 15330.65409                             | -155.7779572                                |
| 4.343671514                            | 133.8538281                                      | 589.6966248                          | 17916.84729                             | -228.8431854                                |
| 4.354349613                            | 130.4560831                                      | 830.3877563                          | 17018.78961                             | -189.6647186                                |
| 4.510829815                            | 149.3340102                                      | 734.5135193                          | 22300.6466                              | -232.4970245                                |
| 4.23838588                             | 119.6056109                                      | 643.0674133                          | 14305.50216                             | -198.6762573                                |
| 4.082443888                            | 111.7063217                                      | 870.4191284                          | 12478.30232                             | -138.6716553                                |
| 3.984988392                            | 97.49182751                                      | 513.8124542                          | 9504.656432                             | -130.4322632                                |
| 4.340986976                            | 124.6193379                                      | 788.304718                           | 15529.97937                             | -167.9347778                                |
| 4.572635847                            | 169.1346992                                      | 788.8546753                          | 28606.54647                             | -136.8182166                                |
| 4.386812222                            | 128.2713264                                      | 691.4448547                          | 16453.53319                             | -140.9210236                                |
| 4.004359916                            | 98.53302682                                      | 698.3430786                          | 9708.757374                             | -165.5860336                                |
| 4.630781825                            | 155.4789926                                      | 855.5882263                          | 24173.71714                             | -247.1667938                                |
| 4.314655943                            | 126.6328052                                      | 616.230957                           | 16035.86735                             | -198.6372452                                |
| 4.291049121                            | 125.2258588                                      | 667.5067444                          | 15681.51572                             | -197.571553                                 |
| 4.011517639                            | 99.28834319                                      | 630.819458                           | 9858.175094                             | -176.0654358                                |
| 4.218653152                            | 128.2221614                                      | 683.6376038                          | 13976.47945                             | -151.8836823                                |
| 4.137883087                            | 131.8253483                                      | 735.0324402                          | 17377.92246                             | -238.7417145                                |
| 4.355961277                            | 126.7128408                                      | 689.5112305                          | 16056.14403                             | -197.2545731                                |
| 4.06129861                             | 112.2994189                                      | 668.1693115                          | 12611.15948                             | -148.2762604                                |
| 4.180781915                            | 111.8198064                                      | 732.9678345                          | 12503.66911                             | -161.9363251                                |
| 4.455244948                            | 137.6754353                                      | 740.8985291                          | 18954.52547                             | -188.198703                                 |
| 4.428612031                            | 138.826746                                       | 769.9763794                          | 19272.86541                             | -139.9123184                                |
| 4.064467863                            | 104.7780159                                      | 660.471405                           | 10978.43262                             | -153.1530319                                |
| 4.113748747                            | 106.4119385                                      | 770.6378174                          | 11323.50066                             | -146.0971069                                |
| 4.274309737                            | 119.7702222                                      | 742.91922                            | 14344.90613                             | -139.5966797                                |
| 3.970704762                            | 96.22486004                                      | 594.6170349                          | 9259.22369                              | -127.9521973                                |
| 4.740088646                            | 166.3329429                                      | 984.6868896                          | 27666.6479                              | -239.2543839                                |
| 4.41707896                             | 133.4517183                                      | 687.5047302                          | 17809.36113                             | -171.037178                                 |
| 4.229312531                            | 124.9273899                                      | 639.0832062                          | 15606.85274                             | -268.3893616                                |
| 3.969700527                            | 108.4837221                                      | 507.5715027                          | 11768.71796                             | -178.9765137                                |
| 4.413999647                            | 130.5071912                                      | 834.8803406                          | 17032.12696                             | -157.3191666                                |

| log.sigma.4.0.mm.3D_firstorder_Kurtosis | log.sigma.4.0.mm.3D_firstorder_Mean | log.sigma.4.0.mm.3D_glrIm_ShortRunLowGrayLevelEmphasis | log.sigma.4.0.mm.3D_glrIm_GrayLevelVariance |
|-----------------------------------------|-------------------------------------|--------------------------------------------------------|---------------------------------------------|
| 2.682771267                             | -56.98575645                        | 0.008785175                                            | 40.11163068                                 |
| 2.567524238                             | -46.66439206                        | 0.02061955                                             | 38.1611963                                  |
| 2.262480448                             | -12.31314767                        | 0.010850898                                            | 36.02466067                                 |
| 2.550384144                             | -44.32127571                        | 0.016969922                                            | 44.63065612                                 |
| 2.313056233                             | -3.41917868                         | 0.014469189                                            | 32.37009407                                 |
| 2.22331196                              | 16.43670258                         | 0.015219812                                            | 36.82555382                                 |
| 4.36399164                              | -6.488159671                        | 0.010062694                                            | 19.30315623                                 |
| 3.287288455                             | -28.63360644                        | 0.006612988                                            | 29.59641931                                 |
| 3.502204408                             | -20.36711355                        | 0.012337317                                            | 22.8287374                                  |
| 2.301713222                             | 26.01417303                         | 0.012602479                                            | 22.33665129                                 |
| 3.159566617                             | 16.47943358                         | 0.0143081                                              | 11.60419548                                 |
| 3.687803993                             | -2.057946632                        | 0.010074346                                            | 19.035399                                   |
| 2.227815222                             | -38.99443208                        | 0.010404753                                            | 39.30814637                                 |
| 2.205863897                             | -92.82074545                        | 0.009439041                                            | 41.79513841                                 |
| 3.316998501                             | -60.20541263                        | 0.012894597                                            | 28.21272858                                 |
| 2.704825135                             | 1.623243739                         | 0.012468132                                            | 26.84683024                                 |
| 2.458140616                             | -1.267772387                        | 0.02544844                                             | 14.2423425                                  |
| 2.371595527                             | -95.70919898                        | 0.021797398                                            | 41.91155137                                 |
| 3.190053257                             | -23.02537671                        | 0.018765064                                            | 11.7573199                                  |
| 3.694669016                             | 19.35922397                         | 0.003878386                                            | 25.02425578                                 |
| 2.193943105                             | -1.895076479                        | 0.018510008                                            | 27.92367268                                 |
| 2.556324818                             | -13.14074754                        | 0.017627708                                            | 27.64011649                                 |
| 2.673568048                             | -28.08859701                        | 0.025658638                                            | 26.19630575                                 |
| 4.126151601                             | -14.61019159                        | 0.018071378                                            | 12.60203455                                 |
| 2.568145819                             | -44.09951942                        | 0.008024416                                            | 35.19475851                                 |
| 2.951059863                             | 2.435952903                         | 0.003727003                                            | 33.81459801                                 |
| 2.805603194                             | -52.85683404                        | 0.007402721                                            | 32.49823626                                 |
| 2.819831623                             | -38.18819418                        | 0.01812709                                             | 19.09261557                                 |
| 2.679187184                             | 46.67662622                         | 0.022208125                                            | 11.22202275                                 |
| 2.829362952                             | -18.96751719                        | 0.010995873                                            | 20.99698989                                 |
| 2.669618986                             | -34.74636122                        | 0.009349835                                            | 26.00571846                                 |
| 2.185486856                             | -90.24277748                        | 0.015661218                                            | 35.49718838                                 |
| 3.254378375                             | -20.18522247                        | 0.009454096                                            | 27.33631381                                 |
| 2.682768678                             | -19.28365014                        | 0.0084609                                              | 22.99202075                                 |
| 2.94640673                              | -12.59317562                        | 0.007622928                                            | 24.5415573                                  |
| 2.499144383                             | -28.04342372                        | 0.006808618                                            | 32.83889927                                 |
| 2.64015928                              | -74.18189435                        | 0.006477565                                            | 42.79698802                                 |
| 3.088976579                             | -8.26087407                         | 0.012261924                                            | 28.57375255                                 |
| 2.53214906                              | -41.95288747                        | 0.020247962                                            | 17.75295916                                 |
| 4.346604724                             | -14.55768846                        | 0.002224351                                            | 18.32933716                                 |
| 2.396697313                             | -67.8720196                         | 0.011504368                                            | 30.88449796                                 |
| 5.225040908                             | 6.486847222                         | 0.009556053                                            | 10.62252371                                 |
| 2.452115089                             | -7.57762193                         | 0.007573464                                            | 40.44435523                                 |
| 2.517887442                             | -41.83716814                        | 0.010398497                                            | 31.57244026                                 |
| 4.33359573                              | -8.116483235                        | 0.0169787                                              | 17.71308589                                 |
| 2.443772149                             | -4.122197702                        | 0.009792389                                            | 31.18249922                                 |
| 3.2799933                               | -8.461948437                        | 0.005522847                                            | 19.35239185                                 |
| 2.693338377                             | -38.93835003                        | 0.021228076                                            | 16.06921408                                 |
| 2.80748457                              | 4.557169813                         | 0.01708527                                             | 29.07954046                                 |
| 2.716624175                             | -9.480439723                        | 0.010516175                                            | 33.40777177                                 |
| 2.503175133                             | -58.64877422                        | 0.010841784                                            | 30.25200291                                 |
| 2.90919622                              | 29.42934288                         | 0.007147494                                            | 31.52346825                                 |
| 5.450662644                             | -7.420762149                        | 0.014861591                                            | 12.07110139                                 |
| 3.283750557                             | -18.34854059                        | 0.004984038                                            | 18.20047664                                 |
| 2.225268655                             | -1.935945303                        | 0.011819288                                            | 47.34169322                                 |
| 2.3647252                               | -21.48448504                        | 0.015584389                                            | 32.88486621                                 |
| 2.958891526                             | -18.05242012                        | 0.009795717                                            | 23.27946545                                 |
| 1.98811595                              | -44.36907689                        | 0.005516481                                            | 29.25895233                                 |
| 2.342089155                             | -74.5837731                         | 0.01946227                                             | 24.87440045                                 |
| 4.353563398                             | -2.8613219                          | 0.005042112                                            | 16.73443171                                 |
| 2.798589466                             | -16.18530469                        | 0.007595242                                            | 25.39699626                                 |
| 2.695036769                             | 17.05555478                         | 0.00671484                                             | 35.32297063                                 |
| 2.765457887                             | 11.46435058                         | 0.003856087                                            | 32.36620681                                 |
| 2.910176066                             | -1.695492624                        | 0.007070207                                            | 31.61458426                                 |
| 2.467947337                             | -15.74661737                        | 0.020151188                                            | 21.49285987                                 |
| 2.837861238                             | -9.699661753                        | 0.005308781                                            | 31.73552723                                 |
| 2.490070391                             | -101.3880913                        | 0.010142701                                            | 30.92156265                                 |
| 3.244743909                             | -26.92635756                        | 0.004549852                                            | 27.38778449                                 |
| 3.201829382                             | -8.691758973                        | 0.007805111                                            | 17.79192404                                 |
| 2.515556894                             | 18.43648029                         | 0.007243549                                            | 24.76910156                                 |
| 1.989417794                             | -45.86445135                        | 0.017207165                                            | 29.00271548                                 |
| 2.98656878                              | -11.97208548                        | 0.005872249                                            | 28.2709519                                  |
| 2.140989012                             | -47.05792365                        | 0.019896866                                            | 35.90880827                                 |
| 2.453923879                             | -52.65102784                        | 0.017160743                                            | 23.11992532                                 |
| 4.823256871                             | -11.52694339                        | 0.007629242                                            | 21.58863238                                 |
| 2.382828306                             | 2.186499208                         | 0.014245413                                            | 15.4359276                                  |
| 2.69687312                              | -4.365983429                        | 0.009863203                                            | 25.20949953                                 |
| 3.04170546                              | -73.31316609                        | 0.009595552                                            | 46.22253975                                 |
| 2.695248823                             | 36.672641                           | 0.009014761                                            | 26.7674684                                  |
| 3.457544797                             | -42.38451491                        | 0.012610428                                            | 16.19420602                                 |
| 2.719449137                             | -59.48571371                        | 0.008188103                                            | 39.3231927                                  |
| 2.420801099                             | -17.89988976                        | 0.009907385                                            | 25.66633219                                 |
| 2.46720457                              | -39.66696804                        | 0.016006841                                            | 25.81274139                                 |
| 2.925751124                             | -51.11080993                        | 0.013675656                                            | 16.11570913                                 |
| 3.296968137                             | -5.802691489                        | 0.009290722                                            | 23.55010258                                 |
| 3.764751151                             | -30.77356461                        | 0.008645808                                            | 28.74685497                                 |
| 2.520273806                             | -39.32472489                        | 0.011148062                                            | 25.92517415                                 |
| 3.750901888                             | -3.645503341                        | 0.014222472                                            | 22.19634969                                 |
| 2.999289136                             | -20.8392195                         | 0.011684258                                            | 20.84329793                                 |
| 2.500705176                             | 0.321918135                         | 0.009372627                                            | 30.63260092                                 |
| 3.056887806                             | 15.15495274                         | 0.006853509                                            | 31.46924535                                 |
| 3.507041582                             | -22.68901283                        | 0.012339638                                            | 18.49660552                                 |
| 3.15340005                              | -12.97011134                        | 0.009240799                                            | 18.53222809                                 |
| 2.796870459                             | 13.60807177                         | 0.010621546                                            | 23.37876302                                 |
| 2.42542556                              | -5.868820374                        | 0.007558463                                            | 15.07251808                                 |
| 2.441465541                             | -19.29734765                        | 0.005723352                                            | 44.52503052                                 |
| 2.257125369                             | 4.249475746                         | 0.011810064                                            | 28.75042212                                 |
| 2.985975545                             | -94.99715836                        | 0.01065964                                             | 25.67022554                                 |
| 2.993552592                             | -24.57826529                        | 0.016677991                                            | 19.3915565                                  |
| 2.754937378                             | 19.75550659                         | 0.004071268                                            | 28.07275354                                 |

| log.sigma.4.0.mm.3D_glrIm_LowGrayLevelRunEmphasis | log.sigma.4.0.mm.3D_glrIm_GrayLevelNonUniformityNormalized | log.sigma.4.0.mm.3D_glrIm_RunVariance | log.sigma.4.0.mm.3D_glrIm_GrayLevelNonUniformity |
|---------------------------------------------------|------------------------------------------------------------|---------------------------------------|--------------------------------------------------|
| 0.00912003                                        | 0.045115291                                                | 0.080911406                           | 60.81821381                                      |
| 0.021910437                                       | 0.04978116                                                 | 0.073214378                           | 16.33196985                                      |
| 0.011394273                                       | 0.046595877                                                | 0.090309157                           | 39.00297163                                      |
| 0.01730376                                        | 0.044383467                                                | 0.052585347                           | 13.63448888                                      |
| 0.015305284                                       | 0.049650196                                                | 0.082663111                           | 65.50173892                                      |
| 0.015718645                                       | 0.048864066                                                | 0.059831259                           | 11.20234342                                      |
| 0.011212057                                       | 0.075788505                                                | 0.490925011                           | 647.2753071                                      |
| 0.007065654                                       | 0.05406985                                                 | 0.158014936                           | 296.07721845                                     |
| 0.013617685                                       | 0.065041547                                                | 0.224365067                           | 242.1584862                                      |
| 0.013293036                                       | 0.059282829                                                | 0.099845862                           | 41.2846117                                       |
| 0.015506123                                       | 0.089091314                                                | 0.177163046                           | 122.9187211                                      |
| 0.011066295                                       | 0.071514279                                                | 0.237033782                           | 210.7807281                                      |
| 0.010777898                                       | 0.048238072                                                | 0.087121471                           | 36.46642164                                      |
| 0.009827059                                       | 0.043859717                                                | 0.05578701                            | 26.85788533                                      |
| 0.013902546                                       | 0.055666736                                                | 0.129750029                           | 80.03267679                                      |
| 0.013644443                                       | 0.058492929                                                | 0.306063379                           | 288.5938361                                      |
| 0.027565932                                       | 0.073071212                                                | 0.131775948                           | 58.26511796                                      |
| 0.023016449                                       | 0.046019112                                                | 0.067776992                           | 17.77498625                                      |
| 0.020522405                                       | 0.086600665                                                | 0.182457202                           | 83.13987322                                      |
| 0.004150035                                       | 0.059780814                                                | 0.168208756                           | 490.5981328                                      |
| 0.01993186                                        | 0.052855798                                                | 0.116388057                           | 101.0016719                                      |
| 0.018707414                                       | 0.057927786                                                | 0.078735344                           | 26.93428837                                      |
| 0.02772314                                        | 0.055740426                                                | 0.09330317                            | 28.84615587                                      |
| 0.020038679                                       | 0.092813655                                                | 0.323757718                           | 280.1544576                                      |
| 0.00853998                                        | 0.048793827                                                | 0.182540817                           | 53.40691118                                      |
| 0.003965054                                       | 0.051835753                                                | 0.137793662                           | 120.4623152                                      |
| 0.007831367                                       | 0.050490643                                                | 0.094216982                           | 93.96653101                                      |
| 0.019568255                                       | 0.064230331                                                | 0.140799212                           | 130.6348537                                      |
| 0.023585234                                       | 0.089745575                                                | 0.14965267                            | 11.73764309                                      |
| 0.011734349                                       | 0.061385829                                                | 0.115902489                           | 90.56598945                                      |
| 0.010163386                                       | 0.055525884                                                | 0.148707777                           | 200.360692                                       |
| 0.016564135                                       | 0.048694088                                                | 0.07108565                            | 36.11578414                                      |
| 0.010166117                                       | 0.05623723                                                 | 0.14931406                            | 118.1444148                                      |
| 0.009109572                                       | 0.061402523                                                | 0.194789749                           | 131.9901438                                      |
| 0.00823375                                        | 0.059047175                                                | 0.158559131                           | 271.7266752                                      |
| 0.007147056                                       | 0.04893353                                                 | 0.101858199                           | 87.7734921                                       |
| 0.006749399                                       | 0.045014779                                                | 0.068884302                           | 64.13493075                                      |
| 0.013404962                                       | 0.062177406                                                | 0.403632617                           | 301.0682435                                      |
| 0.02186867                                        | 0.069841597                                                | 0.099666559                           | 36.12377318                                      |
| 0.002465419                                       | 0.073344343                                                | 0.279635853                           | 591.7864121                                      |
| 0.0122627                                         | 0.050396527                                                | 0.092234485                           | 62.62709672                                      |
| 0.010707162                                       | 0.102867347                                                | 0.342724388                           | 484.6363936                                      |
| 0.007932487                                       | 0.043499899                                                | 0.098046301                           | 98.33879605                                      |
| 0.011054046                                       | 0.049564864                                                | 0.092496995                           | 65.41520778                                      |
| 0.018543054                                       | 0.079693839                                                | 0.321840948                           | 105.4464579                                      |
| 0.010487728                                       | 0.049606386                                                | 0.109133523                           | 109.8086151                                      |
| 0.006030156                                       | 0.065871942                                                | 0.193465065                           | 311.7202061                                      |
| 0.022723629                                       | 0.073434884                                                | 0.112886621                           | 32.93513512                                      |
| 0.017814508                                       | 0.054289207                                                | 0.072685109                           | 19.9334505                                       |
| 0.010809699                                       | 0.050588207                                                | 0.066848731                           | 21.59334474                                      |
| 0.011529129                                       | 0.052956683                                                | 0.095658905                           | 63.18981696                                      |
| 0.007499635                                       | 0.05084564                                                 | 0.091242375                           | 131.3362078                                      |
| 0.016988811                                       | 0.10032734                                                 | 0.535917044                           | 626.0995008                                      |
| 0.005311935                                       | 0.06795097                                                 | 0.137335653                           | 100.4165391                                      |
| 0.012293252                                       | 0.041163927                                                | 0.059541379                           | 25.15425168                                      |
| 0.016533524                                       | 0.048755222                                                | 0.08172267                            | 53.54708572                                      |
| 0.010659381                                       | 0.059902972                                                | 0.19279193                            | 213.6962324                                      |
| 0.005798101                                       | 0.051415412                                                | 0.097553409                           | 98.85591045                                      |
| 0.022302808                                       | 0.056057631                                                | 0.081448173                           | 39.87643581                                      |
| 0.005694806                                       | 0.077308879                                                | 0.52176496                            | 678.7413328                                      |
| 0.008014508                                       | 0.055812119                                                | 0.104872928                           | 68.31856811                                      |
| 0.006988416                                       | 0.047118588                                                | 0.108179532                           | 107.7339887                                      |
| 0.004118069                                       | 0.049877371                                                | 0.144396475                           | 371.4306723                                      |
| 0.007459881                                       | 0.050914044                                                | 0.100705596                           | 98.34394409                                      |
| 0.020961532                                       | 0.05946377                                                 | 0.095877517                           | 37.3138957                                       |
| 0.005598466                                       | 0.049827913                                                | 0.084637192                           | 158.8463064                                      |
| 0.010413495                                       | 0.05485408                                                 | 0.065459935                           | 21.0510904                                       |
| 0.004858332                                       | 0.056241887                                                | 0.112217215                           | 262.0720874                                      |
| 0.008564053                                       | 0.068416034                                                | 0.21741079                            | 450.348889                                       |
| 0.00762268                                        | 0.055885182                                                | 0.104270541                           | 109.2173122                                      |
| 0.017995368                                       | 0.053407983                                                | 0.081827709                           | 24.69254029                                      |
| 0.00630303                                        | 0.056818455                                                | 0.173471685                           | 254.0161659                                      |
| 0.021218407                                       | 0.047476268                                                | 0.088330181                           | 59.10091008                                      |
| 0.018101258                                       | 0.058135327                                                | 0.081814186                           | 51.5765696                                       |
| 0.008402424                                       | 0.072647259                                                | 0.248618881                           | 255.4423324                                      |
| 0.015093761                                       | 0.069615934                                                | 0.12040408                            | 58.63161682                                      |
| 0.010556576                                       | 0.055656376                                                | 0.110558337                           | 112.9205886                                      |
| 0.009768535                                       | 0.050389798                                                | 0.056399097                           | 15.46317743                                      |
| 0.009411305                                       | 0.054392209                                                | 0.08822478                            | 66.45911566                                      |
| 0.013676646                                       | 0.071938618                                                | 0.168571598                           | 115.3007896                                      |
| 0.008532107                                       | 0.045845028                                                | 0.082167711                           | 60.11264107                                      |
| 0.01038074                                        | 0.056153762                                                | 0.081067524                           | 43.24838457                                      |
| 0.017361802                                       | 0.055619534                                                | 0.189316599                           | 114.0353903                                      |
| 0.014721626                                       | 0.070855066                                                | 0.13164045                            | 121.2464299                                      |
| 0.010097789                                       | 0.062675835                                                | 0.201640482                           | 150.209402                                       |
| 0.00882403                                        | 0.074569274                                                | 0.09486829                            | 36.75951484                                      |
| 0.011769842                                       | 0.054517189                                                | 0.094630155                           | 66.02672119                                      |
| 0.015949301                                       | 0.069821279                                                | 0.356566125                           | 224.1499852                                      |
| 0.012357187                                       | 0.063589341                                                | 0.140699939                           | 97.65757726                                      |
| 0.009879316                                       | 0.05090828                                                 | 0.089121422                           | 64.87431287                                      |
| 0.007185197                                       | 0.053461883                                                | 0.115556161                           | 39.25554809                                      |
| 0.01364774                                        | 0.070726668                                                | 0.219621539                           | 156.5375958                                      |
| 0.009904372                                       | 0.065468784                                                | 0.134936101                           | 266.0992836                                      |
| 0.011375865                                       | 0.05838185                                                 | 0.129836443                           | 183.160926                                       |
| 0.008151501                                       | 0.070257861                                                | 0.137402221                           | 209.4299369                                      |
| 0.005993219                                       | 0.041609568                                                | 0.072783447                           | 93.3225757                                       |
| 0.012418655                                       | 0.05086539                                                 | 0.09512626                            | 115.7261705                                      |
| 0.010964837                                       | 0.061641019                                                | 0.082327495                           | 18.03671255                                      |
| 0.017271848                                       | 0.076514021                                                | 0.094521649                           | 19.03811284                                      |
| 0.004329044                                       | 0.053080151                                                | 0.144351044                           | 424.3483063                                      |

| log.sigma.4.0.mm.3D_glrIm_LongRunEmphasis | log.sigma.4.0.mm.3D_glrIm_ShortRunHighGrayLevelEmphasis | log.sigma.4.0.mm.3D_glrIm_RunLengthNonUniformity | log.sigma.4.0.mm.3D_glrIm_ShortRunEmphasis |
|-------------------------------------------|---------------------------------------------------------|--------------------------------------------------|--------------------------------------------|
| 1.229927544                               | 292.0952286                                             | 1184.221449                                      | 0.95026049                                 |
| 1.198941323                               | 270.356841                                              | 296.7645897                                      | 0.959841805                                |
| 1.232084543                               | 279.0417447                                             | 749.8169273                                      | 0.956151727                                |
| 1.152977078                               | 315.3780751                                             | 280.5714758                                      | 0.96518471                                 |
| 1.227954111                               | 202.3872728                                             | 1165.327704                                      | 0.952323017                                |
| 1.176100028                               | 258.5895234                                             | 206.8664391                                      | 0.96006751                                 |
| 2.03358932                                | 149.9067946                                             | 6175.737918                                      | 0.873407816                                |
| 1.39000797                                | 252.213037                                              | 4588.033146                                      | 0.931238526                                |
| 1.544391571                               | 151.1487987                                             | 2970.38387                                       | 0.911106317                                |
| 1.278403833                               | 171.9309225                                             | 600.5038431                                      | 0.942392881                                |
| 1.462263504                               | 107.4992398                                             | 1118.162079                                      | 0.916615032                                |
| 1.583888103                               | 161.5270674                                             | 2303.462919                                      | 0.903881576                                |
| 1.241037788                               | 305.1232296                                             | 663.3552645                                      | 0.94941192                                 |
| 1.162402978                               | 315.8534838                                             | 555.7680645                                      | 0.963013747                                |
| 1.334665842                               | 171.1006824                                             | 1222.500737                                      | 0.936945133                                |
| 1.687966753                               | 169.944852                                              | 3870.053045                                      | 0.903160405                                |
| 1.359875556                               | 97.91298489                                             | 661.0750161                                      | 0.928021635                                |
| 1.190770441                               | 250.596635                                              | 346.4472587                                      | 0.958316152                                |
| 1.492209881                               | 95.88890589                                             | 762.8171045                                      | 0.909097674                                |
| 1.424310939                               | 333.9254941                                             | 6759.853088                                      | 0.924629862                                |
| 1.300819865                               | 173.0666262                                             | 1648.506772                                      | 0.942886907                                |
| 1.220225819                               | 213.6626025                                             | 412.0896675                                      | 0.953020812                                |
| 1.258349244                               | 173.4682458                                             | 450.5746596                                      | 0.946495851                                |
| 1.761201377                               | 101.0673059                                             | 2254.272179                                      | 0.885795977                                |
| 1.453059433                               | 292.1546186                                             | 904.5082459                                      | 0.923964214                                |
| 1.354055461                               | 398.9593239                                             | 1965.10973                                       | 0.934545113                                |
| 1.257253739                               | 261.2894461                                             | 1627.704026                                      | 0.947813209                                |
| 1.372417161                               | 131.9775379                                             | 1693.053941                                      | 0.928833993                                |
| 1.407667517                               | 94.32959391                                             | 107.4925784                                      | 0.922054363                                |
| 1.309794644                               | 175.4919114                                             | 1261.693719                                      | 0.939211566                                |
| 1.386359135                               | 188.7909696                                             | 3002.920817                                      | 0.928486019                                |
| 1.201958255                               | 277.8563436                                             | 661.2829291                                      | 0.955815299                                |
| 1.389890507                               | 203.8900099                                             | 1742.392785                                      | 0.927166961                                |
| 1.465119998                               | 197.3153099                                             | 1767.027784                                      | 0.923459299                                |
| 1.406648101                               | 210.1580586                                             | 3806.245327                                      | 0.926302515                                |
| 1.272722145                               | 317.3880326                                             | 1558.993586                                      | 0.94569888                                 |
| 1.199255049                               | 407.2325548                                             | 1275.299694                                      | 0.956438692                                |
| 1.863147853                               | 182.2367349                                             | 3648.64504                                       | 0.889197358                                |
| 1.276024551                               | 149.0299706                                             | 447.0270929                                      | 0.94324392                                 |
| 1.661110589                               | 453.5448545                                             | 6208.171578                                      | 0.897436954                                |
| 1.256366628                               | 214.2261376                                             | 1081.185753                                      | 0.946409857                                |
| 1.808504633                               | 134.4318848                                             | 3461.445335                                      | 0.879439272                                |
| 1.250740405                               | 323.8180571                                             | 2017.005367                                      | 0.953702484                                |
| 1.252119825                               | 217.2907511                                             | 1154.952518                                      | 0.948456185                                |
| 1.72724567                                | 131.1920333                                             | 1021.027907                                      | 0.897551427                                |
| 1.289572691                               | 229.2637436                                             | 1915.985169                                      | 0.943519797                                |
| 1.476756365                               | 234.1391053                                             | 3838.151229                                      | 0.918463455                                |
| 1.316709137                               | 127.6405214                                             | 379.1662196                                      | 0.934664267                                |
| 1.208963913                               | 184.0862201                                             | 326.0019962                                      | 0.954140638                                |
| 1.190071981                               | 311.9091765                                             | 383.0583188                                      | 0.958279019                                |
| 1.26156132                                | 199.617636                                              | 1038.546587                                      | 0.946396409                                |
| 1.255278575                               | 296.1937132                                             | 2244.817185                                      | 0.946035088                                |
| 2.200474241                               | 100.4331884                                             | 4234.477572                                      | 0.847990843                                |
| 1.378151595                               | 278.9676909                                             | 1221.066964                                      | 0.925222152                                |
| 1.168329829                               | 337.5632263                                             | 555.613747                                       | 0.963335217                                |
| 1.230394863                               | 186.0191619                                             | 967.008426                                       | 0.950913485                                |
| 1.469048033                               | 176.4375537                                             | 2925.575491                                      | 0.921693069                                |
| 1.255278047                               | 296.6924974                                             | 1688.48901                                       | 0.949925585                                |
| 1.233717384                               | 176.370486                                              | 623.3783465                                      | 0.94910954                                 |
| 2.082498277                               | 224.2951815                                             | 6327.815297                                      | 0.871583966                                |
| 1.287281972                               | 235.1279506                                             | 1053.994487                                      | 0.941891407                                |
| 1.273614362                               | 313.7639419                                             | 1999.326566                                      | 0.948169298                                |
| 1.370724972                               | 370.3443279                                             | 6243.610621                                      | 0.931493446                                |
| 1.280235749                               | 285.3463459                                             | 1661.004419                                      | 0.941826392                                |
| 1.263346436                               | 155.6668764                                             | 547.0015254                                      | 0.946451585                                |
| 1.237541763                               | 344.0022819                                             | 2794.562928                                      | 0.949463062                                |
| 1.185577986                               | 289.2519876                                             | 345.1527273                                      | 0.959367264                                |
| 1.305853007                               | 317.4106027                                             | 3971.811106                                      | 0.938280692                                |
| 1.525896478                               | 177.3945877                                             | 5275.314411                                      | 0.913328363                                |
| 1.288093573                               | 239.925175                                              | 1676.792604                                      | 0.940873547                                |
| 1.217970898                               | 183.1320965                                             | 413.5384451                                      | 0.956230073                                |
| 1.420365802                               | 268.3526655                                             | 3721.999079                                      | 0.928548396                                |
| 1.240448062                               | 191.2194152                                             | 1095.439693                                      | 0.950667999                                |
| 1.23098835                                | 147.776709                                              | 780.7719642                                      | 0.950528977                                |
| 1.607910875                               | 203.1458922                                             | 2732.327436                                      | 0.901254245                                |
| 1.317699212                               | 140.8501781                                             | 723.223314                                       | 0.939365288                                |
| 1.298538945                               | 244.292332                                              | 1739.658518                                      | 0.94048691                                 |
| 1.165971264                               | 451.4862408                                             | 278.0853679                                      | 0.962042153                                |
| 1.248925902                               | 238.297296                                              | 1065.138612                                      | 0.947061755                                |
| 1.435014078                               | 146.6989214                                             | 1306.137501                                      | 0.920522342                                |
| 1.23372099                                | 287.9807507                                             | 1149.613915                                      | 0.94946811                                 |
| 1.233808443                               | 230.2362473                                             | 674.5942617                                      | 0.948829305                                |
| 1.442872638                               | 159.8162751                                             | 1727.195819                                      | 0.931085424                                |
| 1.359141161                               | 140.3840822                                             | 1425.314885                                      | 0.929156474                                |
| 1.494817163                               | 187.8228683                                             | 1937.25452                                       | 0.916791829                                |
| 1.260191358                               | 372.9893738                                             | 429.7861619                                      | 0.946963289                                |
| 1.264116998                               | 211.3836653                                             | 1050.132003                                      | 0.944802358                                |
| 1.800541581                               | 140.5167422                                             | 2404.561134                                      | 0.887441153                                |
| 1.371477076                               | 196.2615839                                             | 1278.746995                                      | 0.929009525                                |
| 1.242088857                               | 231.5315425                                             | 1119.744556                                      | 0.950167045                                |
| 1.317645394                               | 372.5400274                                             | 622.2627213                                      | 0.935901694                                |
| 1.540492668                               | 165.8465498                                             | 1767.269674                                      | 0.911056449                                |
| 1.364324045                               | 176.1418233                                             | 3381.153853                                      | 0.928715777                                |
| 1.340092717                               | 183.986945                                              | 2655.352197                                      | 0.935331428                                |
| 1.371967016                               | 179.5936803                                             | 2472.967519                                      | 0.927388331                                |
| 1.204517194                               | 381.0348813                                             | 2002.131608                                      | 0.956122186                                |
| 1.260221652                               | 205.9802756                                             | 1985.321223                                      | 0.946996524                                |
| 1.230190353                               | 287.9984788                                             | 257.9026894                                      | 0.951114017                                |
| 1.260777901                               | 189.1809287                                             | 217.2730408                                      | 0.946897242                                |
| 1.365914817                               | 338.0664047                                             | 6731.237425                                      | 0.933241434                                |

| log.sigma.4.0.mm.3D_glrIm_LongRunHighGrayLevelEmphasis | log.sigma.4.0.mm.3D_glrIm_RunPercentage | log.sigma.4.0.mm.3D_glrIm_LongRunLowGrayLevelEmphasis | log.sigma.4.0.mm.3D_glrIm_RunEntropy |
|--------------------------------------------------------|-----------------------------------------|-------------------------------------------------------|--------------------------------------|
| 364.5975103                                            | 0.933518006                             | 0.010672679                                           | 5.004237341                          |
| 340.4477562                                            | 0.945244957                             | 0.027239477                                           | 4.782073019                          |
| 361.133485                                             | 0.938427044                             | 0.013971729                                           | 4.852823148                          |
| 369.445164                                             | 0.953893932                             | 0.018715647                                           | 4.889190286                          |
| 257.4800551                                            | 0.934961566                             | 0.019060374                                           | 4.81763441                           |
| 310.8610298                                            | 0.947552448                             | 0.017945026                                           | 4.6837594                            |
| 329.9477631                                            | 0.808834585                             | 0.019658432                                           | 4.839823778                          |
| 357.2556138                                            | 0.902274225                             | 0.009513202                                           | 4.914767925                          |
| 232.1375087                                            | 0.873154532                             | 0.020707796                                           | 4.770337647                          |
| 225.1441883                                            | 0.922363729                             | 0.016565172                                           | 4.596532436                          |
| 162.9182383                                            | 0.886296223                             | 0.02202564                                            | 4.2965774                            |
| 262.6709085                                            | 0.864306518                             | 0.01671797                                            | 4.713263652                          |
| 412.5034718                                            | 0.931992791                             | 0.012431493                                           | 4.875051638                          |
| 373.8205571                                            | 0.950907788                             | 0.011472064                                           | 4.897993631                          |
| 218.4149734                                            | 0.912673993                             | 0.019319244                                           | 4.790080569                          |
| 298.3487847                                            | 0.855365391                             | 0.021175464                                           | 4.931432492                          |
| 137.3340894                                            | 0.902953219                             | 0.037654428                                           | 4.39105535                           |
| 302.8281202                                            | 0.944329509                             | 0.028040307                                           | 4.881570105                          |
| 149.7148775                                            | 0.877162143                             | 0.0298853                                             | 4.341009484                          |
| 504.9137188                                            | 0.89351561                              | 0.005651492                                           | 4.861096549                          |
| 234.6799363                                            | 0.919634264                             | 0.027044631                                           | 4.770117591                          |
| 271.5301691                                            | 0.937344913                             | 0.023181416                                           | 4.629697176                          |
| 221.7412644                                            | 0.927350427                             | 0.036537179                                           | 4.683792373                          |
| 186.6558377                                            | 0.837685251                             | 0.031809116                                           | 4.484975709                          |
| 453.404646                                             | 0.890879479                             | 0.011155401                                           | 5.008889874                          |
| 548.8029911                                            | 0.908902131                             | 0.005236288                                           | 4.950736694                          |
| 329.6422513                                            | 0.92860433                              | 0.009859856                                           | 4.868401797                          |
| 186.1867321                                            | 0.902591417                             | 0.026579007                                           | 4.618046017                          |
| 133.1807601                                            | 0.895679663                             | 0.030610939                                           | 4.064100962                          |
| 235.0162352                                            | 0.91638796                              | 0.015423196                                           | 4.632217484                          |
| 264.9502647                                            | 0.900147744                             | 0.014430352                                           | 4.822166638                          |
| 344.2397154                                            | 0.941233893                             | 0.020364502                                           | 4.787399512                          |
| 288.6130336                                            | 0.899588206                             | 0.013876755                                           | 4.868149441                          |
| 305.7126249                                            | 0.889472846                             | 0.012732227                                           | 4.729600169                          |
| 297.9276423                                            | 0.896371892                             | 0.01146669                                            | 4.800549062                          |
| 423.3799117                                            | 0.925060499                             | 0.008763195                                           | 4.887439864                          |
| 508.2586821                                            | 0.942256817                             | 0.00792834                                            | 4.962983901                          |
| 362.1844626                                            | 0.830507579                             | 0.020913773                                           | 5.011266153                          |
| 202.0080472                                            | 0.923489011                             | 0.028818935                                           | 4.40060069                           |
| 814.0957623                                            | 0.853579891                             | 0.003981695                                           | 4.751820283                          |
| 270.1446435                                            | 0.927439724                             | 0.015778605                                           | 4.830411026                          |
| 259.6690881                                            | 0.829526961                             | 0.017923143                                           | 4.401175722                          |
| 414.686093                                             | 0.935133931                             | 0.009927036                                           | 5.009854238                          |
| 271.5080371                                            | 0.929414951                             | 0.014174256                                           | 4.839973787                          |
| 236.4987756                                            | 0.84872454                              | 0.028121366                                           | 4.637770423                          |
| 295.1721804                                            | 0.921955595                             | 0.013856791                                           | 4.875432428                          |
| 357.6284932                                            | 0.88422006                              | 0.008880657                                           | 4.702066374                          |
| 177.203767                                             | 0.913363622                             | 0.029806828                                           | 4.38621818                           |
| 226.4023153                                            | 0.939012394                             | 0.021065787                                           | 4.690750452                          |
| 390.5946236                                            | 0.944349898                             | 0.012071935                                           | 4.747921344                          |
| 244.5083782                                            | 0.927021696                             | 0.014846588                                           | 4.768279944                          |
| 383.3536341                                            | 0.927496202                             | 0.009119607                                           | 4.889606184                          |
| 245.931337                                             | 0.780514621                             | 0.031571048                                           | 4.613279287                          |
| 408.1127151                                            | 0.899934414                             | 0.006945575                                           | 4.601724505                          |
| 411.5973718                                            | 0.950352913                             | 0.01435112                                            | 4.960565372                          |
| 233.3157899                                            | 0.933869702                             | 0.020830638                                           | 4.820414382                          |
| 263.987036                                             | 0.888303477                             | 0.015466471                                           | 4.788971132                          |
| 383.1836635                                            | 0.930184958                             | 0.007243943                                           | 4.740061203                          |
| 218.7063894                                            | 0.932352052                             | 0.034023528                                           | 4.633809337                          |
| 516.8923836                                            | 0.804638123                             | 0.010726996                                           | 4.810626056                          |
| 310.8682776                                            | 0.921051108                             | 0.010043237                                           | 4.745430841                          |
| 417.384958                                             | 0.927352161                             | 0.008365736                                           | 4.965046647                          |
| 524.5096653                                            | 0.904289905                             | 0.005507753                                           | 5.007823218                          |
| 383.4907984                                            | 0.921535526                             | 0.009272167                                           | 4.920125422                          |
| 201.4449223                                            | 0.92694012                              | 0.025155028                                           | 4.573324358                          |
| 441.7587075                                            | 0.931846289                             | 0.006902031                                           | 4.891522305                          |
| 356.9096262                                            | 0.945244411                             | 0.011611633                                           | 4.634242431                          |
| 420.0603781                                            | 0.916345208                             | 0.006373334                                           | 4.82577201                           |
| 284.1751753                                            | 0.876654645                             | 0.013007853                                           | 4.668501172                          |
| 332.4455603                                            | 0.920070984                             | 0.009415159                                           | 4.737046909                          |
| 227.5691134                                            | 0.939649781                             | 0.021694476                                           | 4.631323539                          |
| 395.3009839                                            | 0.897054963                             | 0.008714478                                           | 4.88348475                           |
| 234.6397558                                            | 0.932469029                             | 0.027660159                                           | 4.856558339                          |
| 183.8717889                                            | 0.933846154                             | 0.022454599                                           | 4.580736758                          |
| 337.0953629                                            | 0.860317939                             | 0.01276333                                            | 4.779859023                          |
| 195.0271473                                            | 0.917462712                             | 0.01930144                                            | 4.387701978                          |
| 337.8037838                                            | 0.918480343                             | 0.013822527                                           | 4.762529581                          |
| 547.6414149                                            | 0.949988092                             | 0.010491779                                           | 4.80087346                           |
| 311.710968                                             | 0.92904358                              | 0.011246028                                           | 4.762620493                          |
| 216.7673773                                            | 0.890213675                             | 0.019024569                                           | 4.552248451                          |
| 361.2416796                                            | 0.932541854                             | 0.010123257                                           | 4.990853081                          |
| 304.1774089                                            | 0.932482771                             | 0.012441413                                           | 4.657381657                          |
| 233.3001081                                            | 0.897997708                             | 0.025259045                                           | 4.771574737                          |
| 194.023665                                             | 0.903815677                             | 0.019794715                                           | 4.502347886                          |
| 287.1558103                                            | 0.882079615                             | 0.014565394                                           | 4.805820137                          |
| 512.0330514                                            | 0.927712589                             | 0.009638978                                           | 4.512236228                          |
| 271.6198944                                            | 0.925899788                             | 0.014671233                                           | 4.739652554                          |
| 252.6156157                                            | 0.835285153                             | 0.026740116                                           | 4.853770277                          |
| 278.078207                                             | 0.90268168                              | 0.015640313                                           | 4.678828121                          |
| 295.2595017                                            | 0.932136627                             | 0.012264804                                           | 4.807714207                          |
| 519.213277                                             | 0.91322235                              | 0.008691597                                           | 4.848451354                          |
| 262.8968822                                            | 0.873648074                             | 0.021038669                                           | 4.678668538                          |
| 250.6464223                                            | 0.903030096                             | 0.013222627                                           | 4.617199426                          |
| 252.6875883                                            | 0.910286173                             | 0.015247979                                           | 4.737710692                          |
| 256.8478328                                            | 0.901397967                             | 0.011161025                                           | 4.473026725                          |
| 472.9357152                                            | 0.940791172                             | 0.00718432                                            | 5.062113163                          |
| 269.4875103                                            | 0.927845401                             | 0.015314246                                           | 4.799177497                          |
| 375.3967704                                            | 0.934627673                             | 0.012295031                                           | 4.536470992                          |
| 258.6681392                                            | 0.927956372                             | 0.019834264                                           | 4.300408137                          |
| 493.4063501                                            | 0.905886045                             | 0.005708584                                           | 4.904764182                          |

| log.sigma.4.0.mm.3D_glrIm_HighGrayLevelRunEmphasis | log.sigma.4.0.mm.3D_glrIm_RunLengthNonUniformityNormalized | log.sigma.4.0.mm.3D_glszm_GrayLevelVariance |
|----------------------------------------------------|------------------------------------------------------------|---------------------------------------------|
| 305.1560856                                        | 0.877871947                                                | 48.74342533                                 |
| 281.6944377                                        | 0.902193127                                                | 43.00253902                                 |
| 291.9141839                                        | 0.893498973                                                | 36.06657096                                 |
| 325.426543                                         | 0.912761074                                                | 51.82567493                                 |
| 211.9156629                                        | 0.882818389                                                | 31.92728782                                 |
| 268.1788954                                        | 0.90098674                                                 | 33.86232281                                 |
| 169.5825869                                        | 0.722225876                                                | 31.19961423                                 |
| 267.9489518                                        | 0.836846606                                                | 38.09889354                                 |
| 162.460002                                         | 0.795707249                                                | 26.62999138                                 |
| 181.182872                                         | 0.861004563                                                | 27.63558183                                 |
| 116.1305634                                        | 0.807307342                                                | 16.61427928                                 |
| 175.8141337                                        | 0.780271369                                                | 28.57311444                                 |
| 323.2426494                                        | 0.876506662                                                | 37.46658947                                 |
| 326.3548432                                        | 0.907213305                                                | 39.36747508                                 |
| 178.8972979                                        | 0.849058645                                                | 31.04055166                                 |
| 186.1046203                                        | 0.781378853                                                | 31.2342615                                  |
| 104.5898231                                        | 0.828602748                                                | 18.24994318                                 |
| 259.4766374                                        | 0.896362103                                                | 40.63442226                                 |
| 104.3256555                                        | 0.791696837                                                | 17.4194497                                  |
| 359.9016109                                        | 0.822704521                                                | 39.69531439                                 |
| 182.8878991                                        | 0.86197287                                                 | 27.23305154                                 |
| 223.6587275                                        | 0.88496653                                                 | 29.15072109                                 |
| 181.7117518                                        | 0.869842721                                                | 27.83076056                                 |
| 112.1387899                                        | 0.74538084                                                 | 18.237467                                   |
| 315.031291                                         | 0.823593643                                                | 41.84715078                                 |
| 422.55888                                          | 0.844165455                                                | 38.87803982                                 |
| 272.7327065                                        | 0.873345055                                                | 37.52772961                                 |
| 140.6898985                                        | 0.831251798                                                | 23.28811909                                 |
| 100.6226999                                        | 0.81857822                                                 | 19.38495252                                 |
| 185.2524056                                        | 0.854005626                                                | 24.76141464                                 |
| 200.7616484                                        | 0.830907543                                                | 27.27356646                                 |
| 289.7126164                                        | 0.890730188                                                | 34.50051169                                 |
| 217.5072221                                        | 0.827960482                                                | 32.35152524                                 |
| 212.5230774                                        | 0.820878762                                                | 24.75630126                                 |
| 223.7235802                                        | 0.826180409                                                | 30.60273951                                 |
| 334.9313966                                        | 0.868262682                                                | 33.18084868                                 |
| 424.9850888                                        | 0.893320276                                                | 44.56011598                                 |
| 202.6343466                                        | 0.752781313                                                | 33.2968472                                  |
| 157.8937686                                        | 0.862936289                                                | 19.17981559                                 |
| 501.7750577                                        | 0.767716466                                                | 29.51208481                                 |
| 223.8611345                                        | 0.869364616                                                | 32.50988233                                 |
| 150.7283296                                        | 0.733042051                                                | 20.8894202                                  |
| 338.0868337                                        | 0.888742779                                                | 39.24453592                                 |
| 226.5335733                                        | 0.874335444                                                | 30.50635135                                 |
| 144.2199783                                        | 0.769519783                                                | 26.66305062                                 |
| 240.2272287                                        | 0.864031735                                                | 32.48485596                                 |
| 252.0787791                                        | 0.809909439                                                | 26.35859176                                 |
| 136.0465979                                        | 0.843765165                                                | 19.25738142                                 |
| 191.6552512                                        | 0.88700465                                                 | 32.49531738                                 |
| 325.8005186                                        | 0.896582225                                                | 39.7526385                                  |
| 207.4131036                                        | 0.869576012                                                | 29.79174804                                 |
| 311.4851524                                        | 0.868392099                                                | 37.369916                                   |
| 116.609082                                         | 0.676604564                                                | 21.50926985                                 |
| 300.3028215                                        | 0.824106964                                                | 26.9772328                                  |
| 350.8223446                                        | 0.908580011                                                | 45.33361082                                 |
| 194.3117371                                        | 0.879693633                                                | 31.30013438                                 |
| 189.0291914                                        | 0.817730817                                                | 26.92290612                                 |
| 310.996759                                         | 0.877572951                                                | 28.74546608                                 |
| 183.9517249                                        | 0.875448203                                                | 25.87401971                                 |
| 254.7740656                                        | 0.719231318                                                | 27.43119581                                 |
| 247.9334469                                        | 0.859783463                                                | 31.86616569                                 |
| 330.529863                                         | 0.873781456                                                | 40.97649347                                 |
| 394.7691775                                        | 0.837321217                                                | 38.86637821                                 |
| 302.1622906                                        | 0.859146716                                                | 36.72372352                                 |
| 163.526686                                         | 0.8702676                                                  | 28.00815396                                 |
| 361.1601955                                        | 0.87610387                                                 | 37.89034956                                 |
| 301.3660844                                        | 0.898956337                                                | 34.77657122                                 |
| 334.9606994                                        | 0.851428801                                                | 33.79441043                                 |
| 192.6018041                                        | 0.799569028                                                | 23.69054016                                 |
| 255.6874143                                        | 0.857109898                                                | 28.65964181                                 |
| 190.4148338                                        | 0.892978888                                                | 28.36713869                                 |
| 286.7885738                                        | 0.831580478                                                | 34.13856289                                 |
| 198.5892691                                        | 0.879220721                                                | 34.84383698                                 |
| 154.3182657                                        | 0.879008367                                                | 25.86574872                                 |
| 221.7990377                                        | 0.775448681                                                | 31.66665436                                 |
| 149.7777353                                        | 0.855673617                                                | 18.1744                                     |
| 259.628755                                         | 0.856493353                                                | 30.13624812                                 |
| 469.1650764                                        | 0.905480075                                                | 51.47404844                                 |
| 251.1880095                                        | 0.87096368                                                 | 32.90837799                                 |
| 157.4901814                                        | 0.813757996                                                | 23.5991898                                  |
| 301.1551038                                        | 0.876106387                                                | 47.31936897                                 |
| 243.346282                                         | 0.874773822                                                | 27.45090134                                 |
| 169.6483027                                        | 0.839179226                                                | 26.09011697                                 |
| 149.2184759                                        | 0.831878163                                                | 19.69938971                                 |
| 202.202464                                         | 0.80684339                                                 | 28.71863242                                 |
| 395.9778873                                        | 0.871210961                                                | 39.22004132                                 |
| 221.9162516                                        | 0.865965497                                                | 28.25227936                                 |
| 154.2915298                                        | 0.748379211                                                | 28.08328228                                 |
| 209.417408                                         | 0.831603715                                                | 29.58140021                                 |
| 242.3869885                                        | 0.877991004                                                | 34.07434892                                 |
| 396.9469865                                        | 0.846387858                                                | 39.51285274                                 |
| 179.4205021                                        | 0.795864001                                                | 23.91015018                                 |
| 188.4398221                                        | 0.830790162                                                | 24.53160645                                 |
| 195.1778651                                        | 0.845393347                                                | 29.00911639                                 |
| 192.3545919                                        | 0.828218499                                                | 18.18021951                                 |
| 397.1133762                                        | 0.891809479                                                | 47.99443161                                 |
| 216.6841036                                        | 0.871326837                                                | 30.48617615                                 |
| 302.9410881                                        | 0.880364119                                                | 30.825216                                   |
| 200.4304444                                        | 0.871721499                                                | 24.69536332                                 |
| 362.1665072                                        | 0.841058744                                                | 34.44576821                                 |

| log.sigma.4.0.mm.3D_glszm_SmallAreaHighGrayLevelEmphasis | log.sigma.4.0.mm.3D_glszm_GrayLevelNonUniformityNormalized | log.sigma.4.0.mm.3D_glszm_SizeZoneNonUniformityNormalized |
|----------------------------------------------------------|------------------------------------------------------------|-----------------------------------------------------------|
| 227.9808076                                              | 0.039814126                                                | 0.350420992                                               |
| 175.6890499                                              | 0.042913632                                                | 0.346097815                                               |
| 174.0595396                                              | 0.046658968                                                | 0.328438563                                               |
| 252.0100665                                              | 0.040440771                                                | 0.39261708                                                |
| 137.2192872                                              | 0.049088349                                                | 0.312245311                                               |
| 172.591097                                               | 0.051296108                                                | 0.332132508                                               |
| 128.1588321                                              | 0.050414377                                                | 0.302384927                                               |
| 206.0567173                                              | 0.045245779                                                | 0.324855063                                               |
| 139.3028297                                              | 0.054353262                                                | 0.308493019                                               |
| 130.660482                                               | 0.052405267                                                | 0.301027949                                               |
| 66.68741675                                              | 0.068086845                                                | 0.217184571                                               |
| 137.3529684                                              | 0.052233332                                                | 0.288978397                                               |
| 167.433264                                               | 0.047238966                                                | 0.315598474                                               |
| 237.8149777                                              | 0.045253831                                                | 0.391019109                                               |
| 172.3145215                                              | 0.051880042                                                | 0.386779549                                               |
| 132.0510514                                              | 0.049311362                                                | 0.318833532                                               |
| 65.85428258                                              | 0.066690235                                                | 0.233807227                                               |
| 184.4346563                                              | 0.045545841                                                | 0.336956522                                               |
| 82.10682625                                              | 0.069056454                                                | 0.263506733                                               |
| 226.3731839                                              | 0.044631898                                                | 0.309636858                                               |
| 107.6730275                                              | 0.051942637                                                | 0.263320783                                               |
| 128.8529889                                              | 0.052785371                                                | 0.310632482                                               |
| 145.9159084                                              | 0.054954495                                                | 0.341995758                                               |
| 91.99490666                                              | 0.06760193                                                 | 0.271262552                                               |
| 230.6815827                                              | 0.042990948                                                | 0.360751106                                               |
| 313.9512656                                              | 0.045344575                                                | 0.334144304                                               |
| 214.7132689                                              | 0.045652658                                                | 0.335924371                                               |
| 100.1408205                                              | 0.057159047                                                | 0.269042969                                               |
| 70.68649246                                              | 0.07669832                                                 | 0.237399562                                               |
| 124.6486106                                              | 0.057454754                                                | 0.285119219                                               |
| 138.7191553                                              | 0.05319331                                                 | 0.284826492                                               |
| 193.1087818                                              | 0.048597793                                                | 0.365158538                                               |
| 150.1435467                                              | 0.050364839                                                | 0.306980351                                               |
| 141.7442436                                              | 0.057025171                                                | 0.297794891                                               |
| 168.1005673                                              | 0.049510164                                                | 0.299416738                                               |
| 209.6925762                                              | 0.049157996                                                | 0.34646237                                                |
| 272.5440064                                              | 0.043081657                                                | 0.349528994                                               |
| 152.946896                                               | 0.048803461                                                | 0.349397115                                               |
| 88.01693621                                              | 0.064696578                                                | 0.246093901                                               |
| 348.2056174                                              | 0.052656494                                                | 0.298198317                                               |
| 170.781069                                               | 0.048838985                                                | 0.296088182                                               |
| 112.0711707                                              | 0.064772491                                                | 0.264848507                                               |
| 226.587279                                               | 0.044692215                                                | 0.344351587                                               |
| 166.7208425                                              | 0.050848612                                                | 0.321912519                                               |
| 113.1036378                                              | 0.059377055                                                | 0.257581361                                               |
| 180.871094                                               | 0.048082279                                                | 0.327986491                                               |
| 186.003279                                               | 0.054785452                                                | 0.291703073                                               |
| 93.74745632                                              | 0.065238167                                                | 0.248729943                                               |
| 123.6518218                                              | 0.050655567                                                | 0.300062435                                               |
| 177.149913                                               | 0.046723216                                                | 0.328070323                                               |
| 173.1140197                                              | 0.051171478                                                | 0.359012014                                               |
| 199.6423972                                              | 0.04662                                                    | 0.308574                                                  |
| 90.37314023                                              | 0.062190881                                                | 0.259162632                                               |
| 182.4862171                                              | 0.057345599                                                | 0.291524131                                               |
| 214.4554219                                              | 0.041789802                                                | 0.362226847                                               |
| 123.1752951                                              | 0.04947283                                                 | 0.277674179                                               |
| 141.2285865                                              | 0.053745125                                                | 0.291348753                                               |
| 198.1413139                                              | 0.051929314                                                | 0.299136726                                               |
| 129.7566912                                              | 0.055471079                                                | 0.304701812                                               |
| 180.0398723                                              | 0.053965859                                                | 0.282597531                                               |
| 174.386705                                               | 0.049425079                                                | 0.326002716                                               |
| 189.9888232                                              | 0.043192328                                                | 0.30076572                                                |
| 254.8979595                                              | 0.044363392                                                | 0.325812337                                               |
| 187.9855366                                              | 0.046635024                                                | 0.296718868                                               |
| 105.6543221                                              | 0.054033364                                                | 0.306592604                                               |
| 228.2074997                                              | 0.045097497                                                | 0.319404524                                               |
| 177.9150493                                              | 0.050285676                                                | 0.324735207                                               |
| 239.3639427                                              | 0.048677928                                                | 0.309469715                                               |
| 127.8604269                                              | 0.058456409                                                | 0.266584327                                               |
| 128.8774001                                              | 0.051100191                                                | 0.260369462                                               |
| 141.1884821                                              | 0.052374011                                                | 0.327467722                                               |
| 202.6626784                                              | 0.047660108                                                | 0.305601852                                               |
| 148.4550467                                              | 0.046509367                                                | 0.321288018                                               |
| 112.7070515                                              | 0.054740687                                                | 0.335368882                                               |
| 195.1809415                                              | 0.052284122                                                | 0.338123867                                               |
| 72.67472812                                              | 0.064032                                                   | 0.211424                                                  |
| 139.5214021                                              | 0.050837159                                                | 0.275413757                                               |
| 299.913406                                               | 0.046776881                                                | 0.347515913                                               |
| 144.4794119                                              | 0.047853779                                                | 0.283766519                                               |
| 111.7004359                                              | 0.059156741                                                | 0.255702687                                               |
| 220.2569037                                              | 0.040576303                                                | 0.34343084                                                |
| 129.7580406                                              | 0.052976689                                                | 0.306305637                                               |
| 125.7247507                                              | 0.054314597                                                | 0.31209756                                                |
| 108.3060937                                              | 0.06386663                                                 | 0.264213889                                               |
| 145.0446722                                              | 0.052084403                                                | 0.278969157                                               |
| 168.8018599                                              | 0.047262397                                                | 0.274405992                                               |
| 154.0823238                                              | 0.052222779                                                | 0.324168735                                               |
| 136.0351811                                              | 0.052675058                                                | 0.310366699                                               |
| 148.3257953                                              | 0.051409119                                                | 0.332446753                                               |
| 165.8444744                                              | 0.047571435                                                | 0.308503492                                               |
| 227.6914183                                              | 0.048019146                                                | 0.309722629                                               |
| 153.0106478                                              | 0.058214823                                                | 0.297812207                                               |
| 115.7288862                                              | 0.056653305                                                | 0.265463552                                               |
| 129.9090261                                              | 0.051481854                                                | 0.265067444                                               |
| 118.4987166                                              | 0.065198923                                                | 0.269575708                                               |
| 275.828755                                               | 0.039669248                                                | 0.366260867                                               |
| 127.5371077                                              | 0.049694302                                                | 0.276454654                                               |
| 187.8799157                                              | 0.054208                                                   | 0.357056                                                  |
| 83.04874971                                              | 0.063252595                                                | 0.235986159                                               |
| 202.5476139                                              | 0.047100718                                                | 0.319289473                                               |

| log.sigma.4.0.mm.3D_glszm_SizeZoneNonUniformity | log.sigma.4.0.mm.3D_glszm_GrayLevelNonUniformity | log.sigma.4.0.mm.3D_glszm_LargeAreaEmphasis | log.sigma.4.0.mm.3D_glszm_ZoneVariance |
|-------------------------------------------------|--------------------------------------------------|---------------------------------------------|----------------------------------------|
| 203.9450172                                     | 23.17182131                                      | 19.86941581                                 | 13.7135603                             |
| 53.64516129                                     | 6.651612903                                      | 9.15483871                                  | 4.14301769                             |
| 117.5810056                                     | 16.70391061                                      | 15.2849162                                  | 9.07674542                             |
| 64.78181818                                     | 6.672727273                                      | 6.509090909                                 | 2.700679522                            |
| 165.8022599                                     | 26.06591337                                      | 17.61016949                                 | 10.54918943                            |
| 37.53097345                                     | 5.796460177                                      | 7.079646018                                 | 2.493225781                            |
| 579.3695198                                     | 96.59394572                                      | 2243.927453                                 | 2213.671712                            |
| 605.8546917                                     | 84.38337802                                      | 93.33726542                                 | 82.75122685                            |
| 327.6195857                                     | 57.72316384                                      | 217.8907721                                 | 201.785137                             |
| 73.45081967                                     | 12.78688525                                      | 30.5942623                                  | 21.01980314                            |
| 67.11003236                                     | 21.03883495                                      | 113.2750809                                 | 87.91782658                            |
| 224.8251928                                     | 40.63753213                                      | 289.5745501                                 | 270.3973556                            |
| 98.1511254                                      | 14.69131833                                      | 17.1221865                                  | 10.32199833                            |
| 125.517134                                      | 14.52647975                                      | 7.794392523                                 | 3.769431585                            |
| 217.3701068                                     | 29.15658363                                      | 40.82384342                                 | 32.96988703                            |
| 448.9176136                                     | 69.43039773                                      | 511.90625                                   | 495.1590889                            |
| 46.52763819                                     | 13.27135678                                      | 84.80904523                                 | 65.12042625                            |
| 62                                              | 8.380434783                                      | 8.972826087                                 | 4.031870274                            |
| 54.54589372                                     | 14.29468599                                      | 218.9468599                                 | 191.0153796                            |
| 737.5549958                                     | 106.3131822                                      | 296.663728                                  | 281.8014406                            |
| 149.8295255                                     | 29.55536028                                      | 50.88224956                                 | 37.54499152                            |
| 63.99029126                                     | 10.87378641                                      | 12.18446602                                 | 6.38712414                             |
| 66.00518135                                     | 10.60621762                                      | 24.16580311                                 | 15.80681361                            |
| 164.9276316                                     | 41.10197368                                      | 811.2944079                                 | 776.2939507                            |
| 152.2369668                                     | 18.14218009                                      | 45.46919431                                 | 37.00137014                            |
| 272.3276074                                     | 36.95582822                                      | 56.72392638                                 | 46.88819903                            |
| 242.5373961                                     | 32.96121884                                      | 24.76731302                                 | 17.06322849                            |
| 154.96875                                       | 32.92361111                                      | 72.28645833                                 | 56.98695204                            |
| 8.783783784                                     | 2.837837838                                      | 38.37837838                                 | 22.80788897                            |
| 134.5762712                                     | 27.11864407                                      | 43.80932203                                 | 32.17428541                            |
| 305.6188257                                     | 57.07642125                                      | 101.2199441                                 | 87.2603539                             |
| 124.5190616                                     | 16.57184751                                      | 10.81524927                                 | 5.475219511                            |
| 205.0628743                                     | 33.64371257                                      | 87.55239521                                 | 75.33381217                            |
| 191.4821151                                     | 36.66718507                                      | 96.12597201                                 | 82.01969771                            |
| 415.8898488                                     | 68.76961843                                      | 118.7566595                                 | 105.1002026                            |
| 251.5316804                                     | 35.68870523                                      | 26.71212121                                 | 19.57895446                            |
| 227.1938462                                     | 28.00307692                                      | 11.8                                        | 6.389008284                            |
| 509.7703907                                     | 71.20424949                                      | 747.878684                                  | 731.9608264                            |
| 39.62111801                                     | 10.41614907                                      | 31.36645963                                 | 19.26816095                            |
| 559.4200426                                     | 98.78358209                                      | 664.8630064                                 | 639.504588                             |
| 133.8318584                                     | 22.07522124                                      | 34.5619469                                  | 25.77308325                            |
| 221.148503                                      | 54.08502994                                      | 1442.452695                                 | 1396.310368                            |
| 341.5967742                                     | 44.33467742                                      | 18.35282258                                 | 12.41141633                            |
| 165.463035                                      | 26.13618677                                      | 25.6536965                                  | 18.02148405                            |
| 80.36538462                                     | 18.52564103                                      | 324.1538462                                 | 299.2818869                            |
| 281.7403958                                     | 41.30267753                                      | 31.26309662                                 | 23.45045339                            |
| 360.8367017                                     | 67.76960388                                      | 184.7962813                                 | 166.0838378                            |
| 35.07092199                                     | 9.19858156                                       | 30.30496454                                 | 18.17876364                            |
| 46.50967742                                     | 7.851612903                                      | 13.92903226                                 | 7.565619147                            |
| 62.00529101                                     | 8.830687831                                      | 11.14285714                                 | 5.423420397                            |
| 181.6600791                                     | 26.16600791                                      | 28.91501976                                 | 22.4457381                             |
| 308.574                                         | 46.62                                            | 22.953                                      | 15.196775                              |
| 280.6731302                                     | 67.35272392                                      | 3664.915974                                 | 3610.676761                            |
| 121.2740385                                     | 23.85576923                                      | 83.91346154                                 | 68.33374168                            |
| 112.2903226                                     | 12.95483871                                      | 7.474193548                                 | 3.171914672                            |
| 114.1240876                                     | 20.33333333                                      | 18.67153285                                 | 10.48441579                            |
| 305.9161905                                     | 56.43238095                                      | 130.4828571                                 | 115.8613379                            |
| 218.6689466                                     | 37.96032832                                      | 25.94664843                                 | 17.9511379                             |
| 88.05882353                                     | 16.03114187                                      | 18.44636678                                 | 11.47603597                            |
| 514.6101043                                     | 98.27182867                                      | 2527.55464                                  | 2491.771775                            |
| 153.2212766                                     | 23.22978723                                      | 27.60638298                                 | 19.61072431                            |
| 273.3960396                                     | 39.26182618                                      | 28.60176018                                 | 21.24805726                            |
| 848.0895121                                     | 115.4779101                                      | 143.88398                                   | 133.877683                             |
| 199.0983607                                     | 31.29210134                                      | 30.24739195                                 | 20.4899154                             |
| 72.66244726                                     | 12.80590717                                      | 22.35021097                                 | 14.19038972                            |
| 397.3392283                                     | 56.10128617                                      | 21.88987138                                 | 14.32737138                            |
| 56.17919075                                     | 8.699421965                                      | 10.45086705                                 | 4.943299141                            |
| 502.5788177                                     | 79.05295567                                      | 55.03140394                                 | 45.2272558                             |
| 396.4108944                                     | 86.92468056                                      | 415.872226                                  | 390.3788946                            |
| 168.4590417                                     | 33.0618238                                       | 29.70942813                                 | 18.93236409                            |
| 64.18367347                                     | 10.26530612                                      | 12.95918367                                 | 6.658059142                            |
| 440.0666667                                     | 68.63055556                                      | 201.0881944                                 | 189.1233213                            |
| 169.3187856                                     | 24.51043643                                      | 15.11385199                                 | 8.696715143                            |
| 124.0864865                                     | 20.25405405                                      | 17.77297297                                 | 11.18056976                            |
| 289.0959064                                     | 44.70292398                                      | 496.0678363                                 | 473.2518505                            |
| 52.856                                          | 16.008                                           | 32.968                                      | 19.484416                              |
| 177.3664596                                     | 32.73913043                                      | 36.54192547                                 | 24.77617328                            |
| 53.16993464                                     | 7.156862745                                      | 7.549019608                                 | 3.092229484                            |
| 129.9650655                                     | 21.91703057                                      | 22.00655022                                 | 13.76288114                            |
| 107.6508314                                     | 24.90498812                                      | 105.3539192                                 | 87.07372448                            |
| 191.6344086                                     | 22.64157706                                      | 20.62365591                                 | 14.27470099                            |
| 94.03583062                                     | 16.26384365                                      | 17.99348534                                 | 10.75440588                            |
| 229.7038043                                     | 39.97554348                                      | 67.48913043                                 | 57.87576057                            |
| 121.802603                                      | 29.44251627                                      | 128.3015184                                 | 111.4398954                            |
| 180.4930448                                     | 33.69860896                                      | 209.8438949                                 | 192.2350403                            |
| 48.29545455                                     | 8.318181818                                      | 29.01704545                                 | 19.91448218                            |
| 156.573499                                      | 25.22360248                                      | 22.28985507                                 | 14.95618739                            |
| 249.5348259                                     | 42.35074627                                      | 624.0298507                                 | 601.266033                             |
| 162.5664622                                     | 25.1390593                                       | 111.7770961                                 | 99.6769418                             |
| 156.1027668                                     | 24.07114625                                      | 17.37351779                                 | 10.07497774                            |
| 74.64315353                                     | 11.57261411                                      | 38.37344398                                 | 27.24388354                            |
| 166.1792115                                     | 32.48387097                                      | 270.3620072                                 | 249.7718811                            |
| 292.5408348                                     | 62.43194192                                      | 87.71597096                                 | 71.03371283                            |
| 248.6332623                                     | 48.28997868                                      | 66.84434968                                 | 53.34773437                            |
| 200.294751                                      | 48.44279946                                      | 142.4427995                                 | 122.6325127                            |
| 373.2198234                                     | 40.42296369                                      | 12.80863592                                 | 7.335148373                            |
| 226.4163614                                     | 40.6996337                                       | 26.21245421                                 | 17.24904698                            |
| 44.632                                          | 6.776                                            | 15.992                                      | 9.721984                               |
| 20.05882353                                     | 5.376470588                                      | 23.27058824                                 | 13.32955017                            |
| 864.6358936                                     | 127.5487445                                      | 135.1070901                                 | 124.4893112                            |

| log.sigma.4.0.mm.3D_glszm_ZonePercentage | log.sigma.4.0.mm.3D_glszm_LargeAreaLowGrayLevelEmphasis | log.sigma.4.0.mm.3D_glszm_LargeAreaHighGrayLevelEmphasis | log.sigma.4.0.mm.3D_glszm_HighGrayLevelZoneEmphasis |
|------------------------------------------|---------------------------------------------------------|----------------------------------------------------------|-----------------------------------------------------|
| 0.403047091                              | 0.13520052                                              | 4483.666667                                              | 351.814433                                          |
| 0.446685879                              | 0.184565366                                             | 2685.819355                                              | 280.3612903                                         |
| 0.401345291                              | 0.153153066                                             | 4223.879888                                              | 298                                                 |
| 0.51242236                               | 0.073814102                                             | 1869.909091                                              | 358.3939394                                         |
| 0.376328845                              | 0.346656794                                             | 2977.109228                                              | 228.8775895                                         |
| 0.466942149                              | 0.109276148                                             | 1692.690265                                              | 285.0707965                                         |
| 0.18180093                               | 15.09815894                                             | 344882.4186                                              | 211.2719207                                         |
| 0.307350033                              | 0.478575037                                             | 21770.76139                                              | 328.0841823                                         |
| 0.249178789                              | 2.384925964                                             | 26242.72128                                              | 228.6873823                                         |
| 0.323178808                              | 0.317330907                                             | 4735.512295                                              | 214.1147541                                         |
| 0.198586118                              | 1.496074738                                             | 10759.65372                                              | 139.4724919                                         |
| 0.228353339                              | 2.364514254                                             | 42107.76093                                              | 227.9344473                                         |
| 0.383477189                              | 0.105984757                                             | 6764.758842                                              | 297.4951768                                         |
| 0.498447205                              | 0.09244834                                              | 2045.183801                                              | 353.7943925                                         |
| 0.356825397                              | 0.630959387                                             | 4268.010676                                              | 242.8932384                                         |
| 0.244359597                              | 3.795531925                                             | 79256.61932                                              | 213.196733                                          |
| 0.225368063                              | 1.700004373                                             | 6929.623116                                              | 128.6582915                                         |
| 0.449877751                              | 0.229699784                                             | 1927.581522                                              | 289.8967391                                         |
| 0.189213894                              | 3.189133874                                             | 19027.10628                                              | 139.057971                                          |
| 0.259392355                              | 0.899567384                                             | 102504.0672                                              | 387.9047019                                         |
| 0.273820982                              | 1.130330402                                             | 8228.776801                                              | 198.5254833                                         |
| 0.415322581                              | 0.174585248                                             | 2773.082524                                              | 227.0582524                                         |
| 0.345878136                              | 0.695549644                                             | 3612.953368                                              | 219.5025907                                         |
| 0.169029747                              | 9.478715619                                             | 79266.58717                                              | 160.1529605                                         |
| 0.343648208                              | 0.204826842                                             | 13868.4455                                               | 348.014218                                          |
| 0.31885759                               | 0.213752889                                             | 17933.84663                                              | 495.8932515                                         |
| 0.360279441                              | 0.186343629                                             | 4915.860111                                              | 330.9238227                                         |
| 0.255659121                              | 1.051510598                                             | 8073.96875                                               | 176.9878472                                         |
| 0.253424658                              | 0.679032079                                             | 2901.216216                                              | 129.9189189                                         |
| 0.293167702                              | 0.544163879                                             | 6276.358051                                              | 214.815678                                          |
| 0.267647792                              | 1.167016707                                             | 13174.3383                                               | 244.9804287                                         |
| 0.432741117                              | 0.155130325                                             | 2919.777126                                              | 302.941349                                          |
| 0.28608137                               | 0.709575879                                             | 13621.98802                                              | 256.8577844                                         |
| 0.266252588                              | 0.689416918                                             | 18581.48989                                              | 243.0419907                                         |
| 0.270601987                              | 0.972568911                                             | 17637.49604                                              | 279.737941                                          |
| 0.374419804                              | 0.139539641                                             | 8455.264463                                              | 341.362259                                          |
| 0.42989418                               | 0.060117328                                             | 5208.027692                                              | 432.4076923                                         |
| 0.250644219                              | 4.379331483                                             | 142308.9938                                              | 241.5935572                                         |
| 0.2875                                   | 0.491533651                                             | 5094.068323                                              | 165.1242236                                         |
| 0.19858156                               | 1.435504657                                             | 317626.6322                                              | 584.8981876                                         |
| 0.337313433                              | 0.420173451                                             | 4844.621681                                              | 277.5154867                                         |
| 0.147214386                              | 11.90521655                                             | 184579.6599                                              | 198.9760479                                         |
| 0.41025641                               | 0.13122354                                              | 4761.757056                                              | 361.46875                                           |
| 0.361971831                              | 0.332757121                                             | 3770.754864                                              | 271.4202335                                         |
| 0.200514139                              | 3.151925212                                             | 39779.41346                                              | 190.3717949                                         |
| 0.357767597                              | 0.328227392                                             | 5139.797439                                              | 287.145518                                          |
| 0.231171744                              | 0.996621304                                             | 41486.52708                                              | 311.1139854                                         |
| 0.287169043                              | 0.617936934                                             | 3910.865248                                              | 161.5602837                                         |
| 0.396419437                              | 0.207656639                                             | 2358.96129                                               | 217.8064516                                         |
| 0.418141593                              | 0.071869836                                             | 3753.724868                                              | 311.9153439                                         |
| 0.393162393                              | 0.416268746                                             | 2964.934783                                              | 262.3241107                                         |
| 0.359066427                              | 0.131912267                                             | 5906.176                                                 | 340.896                                             |
| 0.135782347                              | 35.18517094                                             | 397790.0166                                              | 158.6565097                                         |
| 0.253349574                              | 0.346238528                                             | 23505.60096                                              | 323.3798077                                         |
| 0.482115086                              | 0.086562637                                             | 2553.780645                                              | 352.1483871                                         |
| 0.349489796                              | 0.448449194                                             | 2486.379562                                              | 225.5328467                                         |
| 0.261519303                              | 1.204437305                                             | 19712.49333                                              | 238.2514286                                         |
| 0.353652637                              | 0.173497748                                             | 6064.630643                                              | 342.3406293                                         |
| 0.378768021                              | 0.495859016                                             | 2545.989619                                              | 213.3460208                                         |
| 0.167171578                              | 10.59261801                                             | 619008.5327                                              | 313.0801757                                         |
| 0.35364936                               | 0.184009338                                             | 5693.344681                                              | 278.2893617                                         |
| 0.368762677                              | 0.129291704                                             | 8614.480748                                              | 339.7832783                                         |
| 0.316128249                              | 0.519613737                                             | 42766.22628                                              | 430.1552055                                         |
| 0.320133588                              | 0.185868584                                             | 8507.591654                                              | 326.5350224                                         |
| 0.350073855                              | 0.324348005                                             | 2873.240506                                              | 180.535865                                          |
| 0.363636364                              | 0.099822497                                             | 7368.803859                                              | 382.5836013                                         |
| 0.426108374                              | 0.071905379                                             | 3088.104046                                              | 304.6473988                                         |
| 0.319370698                              | 0.260286671                                             | 13619.63116                                              | 396.8799261                                         |
| 0.198055408                              | 2.713024094                                             | 77070.13248                                              | 231.8298588                                         |
| 0.304613936                              | 0.173377388                                             | 7867.958269                                              | 252.3632148                                         |
| 0.398373984                              | 0.241865189                                             | 2007.05102                                               | 221.5204082                                         |
| 0.289098575                              | 0.889629758                                             | 54140.39653                                              | 336.6569444                                         |
| 0.394756554                              | 0.35961433                                              | 2098.184061                                              | 234.5806452                                         |
| 0.389473684                              | 0.30400357                                              | 2100.637838                                              | 176.6243243                                         |
| 0.209353575                              | 2.862426983                                             | 93750.10994                                              | 304.9017544                                         |
| 0.272331155                              | 0.398472771                                             | 4520.616                                                 | 158.36                                              |
| 0.291534631                              | 0.296433263                                             | 8723.313665                                              | 262.7934783                                         |
| 0.473684211                              | 0.044030225                                             | 3477.372549                                              | 482.6470588                                         |
| 0.348288973                              | 0.141081877                                             | 5380.633188                                              | 259.2860262                                         |
| 0.233888889                              | 1.014860346                                             | 14274.4228                                               | 199.4608076                                         |
| 0.396870555                              | 0.140334331                                             | 4608.247312                                              | 346.7706093                                         |
| 0.371670702                              | 0.130173584                                             | 4918.739414                                              | 232.6775244                                         |
| 0.322524102                              | 0.944001202                                             | 9521.350543                                              | 206.4375                                            |
| 0.24352879                               | 1.324115785                                             | 15525.41215                                              | 190.2255965                                         |
| 0.238305709                              | 1.546107404                                             | 33918.03555                                              | 254.9258114                                         |
| 0.331450094                              | 0.088192142                                             | 13560.71591                                              | 340.7159091                                         |
| 0.369266055                              | 0.226615106                                             | 3799.395445                                              | 250.8364389                                         |
| 0.209593326                              | 5.781042007                                             | 77957.84204                                              | 222.1032338                                         |
| 0.287477954                              | 0.763205853                                             | 18840.27607                                              | 238.5582822                                         |
| 0.370153621                              | 0.155314096                                             | 3872.924901                                              | 270.7233202                                         |
| 0.299751244                              | 0.153667948                                             | 13817.09129                                              | 407.6431535                                         |
| 0.220379147                              | 2.219463706                                             | 41758.91577                                              | 243.2473118                                         |
| 0.244834481                              | 0.782066998                                             | 13277.57713                                              | 214.2059891                                         |
| 0.272199652                              | 0.634919938                                             | 10344.20469                                              | 230.0863539                                         |
| 0.224674932                              | 1.197428764                                             | 20079.9825                                               | 219.1480485                                         |
| 0.427432886                              | 0.064162747                                             | 4904.361138                                              | 419.9656526                                         |
| 0.334013051                              | 0.28602277                                              | 4520.483516                                              | 233.4529915                                         |
| 0.399361022                              | 0.088244962                                             | 5048.512                                                 | 302.152                                             |
| 0.317164179                              | 0.189536605                                             | 5203.929412                                              | 184.9411765                                         |
| 0.306890299                              | 0.431137881                                             | 48259.1562                                               | 359.6166913                                         |

| log.sigma.4.0.mm.3D_glszm_SmallAreaEmphasis | log.sigma.4.0.mm.3D_glszm_LowGrayLevelZoneEmphasis | log.sigma.4.0.mm.3D_glszm_ZoneEntropy | log.sigma.4.0.mm.3D_glszm_SmallAreaLowGrayLevelEmphasis |
|---------------------------------------------|----------------------------------------------------|---------------------------------------|---------------------------------------------------------|
| 0.609913647                                 | 0.012069045                                        | 6.572886645                           | 0.009196262                                             |
| 0.606653159                                 | 0.018991794                                        | 6.086590235                           | 0.008193124                                             |
| 0.587488026                                 | 0.011171756                                        | 6.323126638                           | 0.005708111                                             |
| 0.648002525                                 | 0.023006974                                        | 6.027982745                           | 0.018883532                                             |
| 0.57530593                                  | 0.014123426                                        | 6.475044945                           | 0.007618411                                             |
| 0.586378844                                 | 0.019374665                                        | 5.710585352                           | 0.014802931                                             |
| 0.568154442                                 | 0.01318989                                         | 6.876292688                           | 0.007793975                                             |
| 0.587606793                                 | 0.007477805                                        | 6.803888644                           | 0.004625679                                             |
| 0.571771005                                 | 0.011120406                                        | 6.540328188                           | 0.005468397                                             |
| 0.56466853                                  | 0.015420699                                        | 6.184779105                           | 0.010005666                                             |
| 0.469446999                                 | 0.019165369                                        | 6.422530207                           | 0.011161594                                             |
| 0.549980297                                 | 0.012655984                                        | 6.672317514                           | 0.008042599                                             |
| 0.578303453                                 | 0.015145319                                        | 6.29610428                            | 0.01154602                                              |
| 0.645456206                                 | 0.010253658                                        | 6.093780794                           | 0.007438675                                             |
| 0.645194469                                 | 0.011341019                                        | 6.168990086                           | 0.006955597                                             |
| 0.582841455                                 | 0.012796753                                        | 6.679358232                           | 0.007055954                                             |
| 0.488503462                                 | 0.026333342                                        | 6.078562042                           | 0.009089222                                             |
| 0.594452241                                 | 0.021612433                                        | 6.100754112                           | 0.010968525                                             |
| 0.524239549                                 | 0.02123937                                         | 5.954610085                           | 0.011508062                                             |
| 0.572888842                                 | 0.00514496                                         | 6.996934113                           | 0.003327215                                             |
| 0.522916793                                 | 0.015100846                                        | 6.600260036                           | 0.005740729                                             |
| 0.566008512                                 | 0.016805888                                        | 6.035863631                           | 0.006572842                                             |
| 0.605360322                                 | 0.016194215                                        | 5.978713727                           | 0.005152933                                             |
| 0.534245353                                 | 0.019126375                                        | 6.390623096                           | 0.007988086                                             |
| 0.623045001                                 | 0.009290918                                        | 6.445825768                           | 0.004238815                                             |
| 0.596602163                                 | 0.00471995                                         | 6.633741059                           | 0.003408937                                             |
| 0.599186738                                 | 0.007957978                                        | 6.613989198                           | 0.004875475                                             |
| 0.53123409                                  | 0.019115962                                        | 6.58580223                            | 0.00837753                                              |
| 0.479066512                                 | 0.042388928                                        | 4.864726676                           | 0.034663283                                             |
| 0.548716919                                 | 0.01276726                                         | 6.475167278                           | 0.007940279                                             |
| 0.545971243                                 | 0.008855716                                        | 6.685772445                           | 0.004774619                                             |
| 0.626671114                                 | 0.013938304                                        | 6.22410345                            | 0.005606538                                             |
| 0.569916275                                 | 0.010925918                                        | 6.568831074                           | 0.006447749                                             |
| 0.56051209                                  | 0.009172101                                        | 6.437094011                           | 0.004323482                                             |
| 0.561096581                                 | 0.008534968                                        | 6.764091961                           | 0.005097327                                             |
| 0.609903168                                 | 0.008180909                                        | 6.460069324                           | 0.005494896                                             |
| 0.609436404                                 | 0.007583934                                        | 6.547037469                           | 0.004809385                                             |
| 0.612959106                                 | 0.014177709                                        | 6.626654259                           | 0.008657549                                             |
| 0.505339289                                 | 0.020909808                                        | 6.05984673                            | 0.006644096                                             |
| 0.564215288                                 | 0.002752748                                        | 6.874313648                           | 0.001754517                                             |
| 0.55231368                                  | 0.010360954                                        | 6.481012617                           | 0.003864628                                             |
| 0.525778676                                 | 0.012574                                           | 6.632495607                           | 0.005523855                                             |
| 0.604713896                                 | 0.0078161                                          | 6.588082863                           | 0.004106316                                             |
| 0.583147553                                 | 0.010453717                                        | 6.402944089                           | 0.006562428                                             |
| 0.515912439                                 | 0.0195011                                          | 6.405214118                           | 0.008241712                                             |
| 0.590207299                                 | 0.008762173                                        | 6.536924399                           | 0.004152588                                             |
| 0.555949138                                 | 0.00601804                                         | 6.744222929                           | 0.003438384                                             |
| 0.504847406                                 | 0.021805089                                        | 5.922779101                           | 0.008686358                                             |
| 0.546984318                                 | 0.020968391                                        | 6.004944931                           | 0.014533949                                             |
| 0.58947172                                  | 0.015136098                                        | 6.097040658                           | 0.01115489                                              |
| 0.616929608                                 | 0.0107407                                          | 6.193491276                           | 0.006689285                                             |
| 0.571272349                                 | 0.00863708                                         | 6.769551307                           | 0.004573314                                             |
| 0.520790999                                 | 0.019282218                                        | 6.729109855                           | 0.009044289                                             |
| 0.552725531                                 | 0.0077257                                          | 6.44246897                            | 0.005544223                                             |
| 0.617654234                                 | 0.01200683                                         | 6.219856154                           | 0.006076935                                             |
| 0.536916864                                 | 0.015129932                                        | 6.496592774                           | 0.009374354                                             |
| 0.554069953                                 | 0.010080526                                        | 6.644418848                           | 0.005648431                                             |
| 0.560112932                                 | 0.00616499                                         | 6.494589585                           | 0.003922062                                             |
| 0.557890812                                 | 0.015236425                                        | 6.122607297                           | 0.005156333                                             |
| 0.543982325                                 | 0.006205697                                        | 6.858627224                           | 0.003355417                                             |
| 0.588692129                                 | 0.009590371                                        | 6.425508261                           | 0.006664251                                             |
| 0.560925177                                 | 0.009224056                                        | 6.816769212                           | 0.006535687                                             |
| 0.589306108                                 | 0.004577185                                        | 6.893222033                           | 0.00294588                                              |
| 0.561656934                                 | 0.008397388                                        | 6.754893409                           | 0.005090597                                             |
| 0.570165993                                 | 0.028395176                                        | 6.151729036                           | 0.019171804                                             |
| 0.582027404                                 | 0.005837298                                        | 6.798167163                           | 0.003036485                                             |
| 0.584612548                                 | 0.014788115                                        | 6.007851518                           | 0.011433133                                             |
| 0.571286149                                 | 0.004981548                                        | 6.783983281                           | 0.002917265                                             |
| 0.529984085                                 | 0.008580755                                        | 6.870432381                           | 0.004422434                                             |
| 0.52071679                                  | 0.009505779                                        | 6.751515119                           | 0.005866459                                             |
| 0.590089518                                 | 0.018323695                                        | 6.023209441                           | 0.011965485                                             |
| 0.568724919                                 | 0.006301483                                        | 6.796155699                           | 0.003651458                                             |
| 0.582437225                                 | 0.017254812                                        | 6.402474912                           | 0.007481917                                             |
| 0.598165225                                 | 0.019252536                                        | 6.149506104                           | 0.012297014                                             |
| 0.602427363                                 | 0.00778082                                         | 6.516326511                           | 0.003542222                                             |
| 0.448882422                                 | 0.017421408                                        | 6.337985601                           | 0.006476817                                             |
| 0.539183133                                 | 0.011761978                                        | 6.768906708                           | 0.005667615                                             |
| 0.605520796                                 | 0.014661599                                        | 6.04709681                            | 0.012635905                                             |
| 0.543361331                                 | 0.012413789                                        | 6.623267323                           | 0.008390782                                             |
| 0.513589335                                 | 0.014354696                                        | 6.555434999                           | 0.006359963                                             |
| 0.602074907                                 | 0.010631333                                        | 6.550407892                           | 0.007741764                                             |
| 0.566878341                                 | 0.012806767                                        | 6.242343743                           | 0.008817602                                             |
| 0.574169055                                 | 0.013284698                                        | 6.442687535                           | 0.006127803                                             |
| 0.522442979                                 | 0.015223462                                        | 6.338834279                           | 0.005989644                                             |
| 0.541078609                                 | 0.009915485                                        | 6.627629466                           | 0.005417147                                             |
| 0.525448126                                 | 0.018384398                                        | 6.268023434                           | 0.016015853                                             |
| 0.587228469                                 | 0.012897061                                        | 6.351025573                           | 0.008357749                                             |
| 0.572705703                                 | 0.01239712                                         | 6.538014688                           | 0.00656189                                              |
| 0.596656526                                 | 0.016410865                                        | 6.402830727                           | 0.008855022                                             |
| 0.572012325                                 | 0.010602765                                        | 6.525541944                           | 0.00656134                                              |
| 0.573356817                                 | 0.009853029                                        | 6.277269766                           | 0.004650601                                             |
| 0.563858728                                 | 0.009962487                                        | 6.357792708                           | 0.003600985                                             |
| 0.52659014                                  | 0.011538733                                        | 6.777766141                           | 0.006290355                                             |
| 0.525843559                                 | 0.011821534                                        | 6.849135437                           | 0.006195877                                             |
| 0.533663249                                 | 0.009106876                                        | 6.520392004                           | 0.005593668                                             |
| 0.626441687                                 | 0.006021234                                        | 6.691165515                           | 0.003173982                                             |
| 0.535264726                                 | 0.013620772                                        | 6.740797591                           | 0.007180496                                             |
| 0.617050861                                 | 0.016412323                                        | 5.635745538                           | 0.012217293                                             |
| 0.477623452                                 | 0.029302298                                        | 5.74745373                            | 0.020542803                                             |
| 0.581715432                                 | 0.005027613                                        | 6.823522339                           | 0.003230872                                             |

| log.sigma.4.0.mm.3D_ngtdm_Coarseness | log.sigma.4.0.mm.3D_ngtdm_Complexity | log.sigma.4.0.mm.3D_ngtdm_Strength | log.sigma.4.0.mm.3D_ngtdm_Busyness | log.sigma.4.0.mm.3D_ngtdm_Contrast |
|--------------------------------------|--------------------------------------|------------------------------------|------------------------------------|------------------------------------|
| 0.008014695                          | 0.763575536                          | 2.96246847                         | 0.253926607                        | 0.000108598                        |
| 0.024063553                          | 2.34471699                           | 6.750556398                        | 0.097254694                        | 0.000723406                        |
| 0.011263593                          | 0.946060547                          | 3.0555868                          | 0.20783981                         | 0.00022921                         |
| 0.03171783                           | 2.772336951                          | 9.146105417                        | 0.069435453                        | 0.000770834                        |
| 0.007537731                          | 0.481772799                          | 2.075392539                        | 0.385825274                        | 0.000117824                        |
| 0.044102578                          | 2.228379753                          | 9.92558492                         | 0.070251544                        | 0.000979176                        |
| 0.001318449                          | 0.073522173                          | 0.779755983                        | 1.352279258                        | 3.59E-06                           |
| 0.001901252                          | 0.154841047                          | 0.715284106                        | 1.002005801                        | 1.69E-05                           |
| 0.002813557                          | 0.12313565                           | 0.741820452                        | 1.144329416                        | 2.26E-05                           |
| 0.015338947                          | 0.490610759                          | 2.586441399                        | 0.279452625                        | 0.000182328                        |
| 0.007955895                          | 0.152745024                          | 1.236385753                        | 0.532768477                        | 3.78E-05                           |
| 0.003514732                          | 0.160160258                          | 1.035258689                        | 0.705440334                        | 2.03E-05                           |
| 0.012178886                          | 1.078111998                          | 3.98002221                         | 0.149267578                        | 0.000240446                        |
| 0.014738449                          | 1.623152646                          | 4.781313656                        | 0.137035803                        | 0.000351756                        |
| 0.006641842                          | 0.636180734                          | 2.792134212                        | 0.391210497                        | 7.14E-05                           |
| 0.002241881                          | 0.113768175                          | 0.646120079                        | 1.154338637                        | 1.76E-05                           |
| 0.013326045                          | 0.209202024                          | 1.348108608                        | 0.519777364                        | 0.00013161                         |
| 0.022716298                          | 2.278057627                          | 7.341291137                        | 0.105992268                        | 0.000574063                        |
| 0.010776125                          | 0.177634668                          | 1.296788201                        | 0.489610417                        | 6.93E-05                           |
| 0.001421863                          | 0.117700766                          | 0.782745311                        | 0.80062727                         | 5.85E-06                           |
| 0.0052201                            | 0.211203277                          | 1.015179814                        | 0.739727007                        | 8.57E-05                           |
| 0.018596225                          | 0.98177975                           | 3.767605077                        | 0.163881738                        | 0.000398113                        |
| 0.020016413                          | 0.949850614                          | 4.465554309                        | 0.159021603                        | 0.000257024                        |
| 0.003662731                          | 0.066864353                          | 0.667118662                        | 1.048360885                        | 1.45E-05                           |
| 0.010210356                          | 0.652035057                          | 3.081335532                        | 0.196900061                        | 0.000111895                        |
| 0.004554996                          | 0.444656958                          | 2.171440403                        | 0.299409312                        | 3.88E-05                           |
| 0.00546083                           | 0.538571236                          | 2.260036604                        | 0.352984854                        | 5.86E-05                           |
| 0.005523815                          | 0.166212349                          | 1.073483551                        | 0.715873369                        | 4.27E-05                           |
| 0.071261782                          | 0.892375483                          | 6.318867873                        | 0.133401747                        | 0.000799088                        |
| 0.006513384                          | 0.356995247                          | 1.711548407                        | 0.425742155                        | 6.20E-05                           |
| 0.002911817                          | 0.167995306                          | 0.87107111                         | 0.98263514                         | 2.68E-05                           |
| 0.010725717                          | 0.997506231                          | 2.806720631                        | 0.227557429                        | 0.000311239                        |
| 0.005526239                          | 0.335942057                          | 2.141373841                        | 0.397351851                        | 3.73E-05                           |
| 0.00513063                           | 0.248319055                          | 1.583388843                        | 0.471307623                        | 3.40E-05                           |
| 0.002296054                          | 0.14663943                           | 0.812764162                        | 0.963922309                        | 1.65E-05                           |
| 0.005338835                          | 0.445057745                          | 1.599725889                        | 0.352992003                        | 8.25E-05                           |
| 0.006281692                          | 0.753919842                          | 2.269876255                        | 0.249615745                        | 0.000143603                        |
| 0.002372311                          | 0.130704491                          | 0.905239309                        | 0.864689435                        | 1.38E-05                           |
| 0.016797948                          | 0.556884057                          | 2.714198042                        | 0.224503382                        | 0.000231145                        |
| 0.001418388                          | 0.082179139                          | 0.798377316                        | 0.681422171                        | 3.81E-06                           |
| 0.008354995                          | 0.574465308                          | 2.723828519                        | 0.313716374                        | 9.88E-05                           |
| 0.002145155                          | 0.072265975                          | 0.849154135                        | 0.993060212                        | 4.54E-06                           |
| 0.004129873                          | 0.466223234                          | 1.492255447                        | 0.469176545                        | 7.68E-05                           |
| 0.007388869                          | 0.575997901                          | 2.35567442                         | 0.365749648                        | 0.000102699                        |
| 0.008171326                          | 0.281439021                          | 2.467148252                        | 0.326491011                        | 3.73E-05                           |
| 0.004604578                          | 0.333816914                          | 1.37273554                         | 0.564661309                        | 5.91E-05                           |
| 0.002330809                          | 0.117298047                          | 0.775331809                        | 0.808306838                        | 1.17E-05                           |
| 0.019008746                          | 0.640875338                          | 2.9516493                          | 0.211868951                        | 0.000240896                        |
| 0.02833865                           | 1.4700717                            | 7.149523305                        | 0.113036089                        | 0.000380044                        |
| 0.022214947                          | 1.623300117                          | 6.032355662                        | 0.094966028                        | 0.000412206                        |
| 0.007559227                          | 0.609150063                          | 2.335290826                        | 0.423409523                        | 0.000117975                        |
| 0.004263221                          | 0.349886379                          | 1.70419469                         | 0.408426518                        | 3.74E-05                           |
| 0.001695043                          | 0.042761471                          | 0.55358646                         | 1.605485119                        | 3.88E-06                           |
| 0.007005399                          | 0.363940795                          | 2.123519267                        | 0.252694847                        | 4.00E-05                           |
| 0.015712447                          | 1.462063134                          | 4.838854459                        | 0.138447852                        | 0.000416264                        |
| 0.0090156                            | 0.60158453                           | 2.504799921                        | 0.383269955                        | 0.000147531                        |
| 0.003014904                          | 0.157065945                          | 0.920171331                        | 0.874137729                        | 2.19E-05                           |
| 0.004548558                          | 0.398379459                          | 1.387286823                        | 0.475045739                        | 7.16E-05                           |
| 0.012424214                          | 0.648267417                          | 2.361695721                        | 0.289932474                        | 0.000233276                        |
| 0.001299273                          | 0.052932297                          | 0.526587109                        | 1.139961674                        | 3.18E-06                           |
| 0.008441431                          | 0.565789025                          | 2.533172046                        | 0.261543624                        | 7.89E-05                           |
| 0.004852631                          | 0.445882832                          | 1.99957529                         | 0.332191413                        | 4.71E-05                           |
| 0.00157745                           | 0.158817984                          | 0.844672228                        | 0.753095882                        | 9.47E-06                           |
| 0.006276157                          | 0.426856097                          | 2.516467472                        | 0.265007384                        | 4.55E-05                           |
| 0.015615792                          | 0.61902332                           | 2.561519533                        | 0.259148973                        | 0.000219762                        |
| 0.003337364                          | 0.344970149                          | 1.496310107                        | 0.414113701                        | 2.92E-05                           |
| 0.020886642                          | 1.610103154                          | 5.080979516                        | 0.116243639                        | 0.000560468                        |
| 0.002264026                          | 0.211722361                          | 1.10936201                         | 0.621666619                        | 1.49E-05                           |
| 0.001530827                          | 0.076427811                          | 0.527821446                        | 1.463804243                        | 7.86E-06                           |
| 0.005274326                          | 0.246056941                          | 1.173460759                        | 0.498558329                        | 6.16E-05                           |
| 0.019136579                          | 1.027877329                          | 3.821429026                        | 0.192866861                        | 0.000422211                        |
| 0.002532799                          | 0.192230623                          | 0.987782877                        | 0.63602973                         | 1.75E-05                           |
| 0.006995388                          | 0.648314915                          | 2.219448451                        | 0.458875795                        | 0.000149537                        |
| 0.010399622                          | 0.509744735                          | 2.169719811                        | 0.425593892                        | 0.000158266                        |
| 0.003553878                          | 0.169504628                          | 1.823503685                        | 0.461292107                        | 1.09E-05                           |
| 0.011731545                          | 0.284625545                          | 1.525737335                        | 0.392351412                        | 0.000124773                        |
| 0.005072768                          | 0.353196155                          | 1.754022867                        | 0.374129237                        | 4.22E-05                           |
| 0.024679826                          | 3.363263205                          | 9.981638363                        | 0.061876453                        | 0.000845544                        |
| 0.009655034                          | 0.431204075                          | 2.369181096                        | 0.250052106                        | 8.87E-05                           |
| 0.006933671                          | 0.289853683                          | 2.118628126                        | 0.361374442                        | 3.10E-05                           |
| 0.00818963                           | 0.780072499                          | 3.072436447                        | 0.246964056                        | 0.000108026                        |
| 0.012554969                          | 0.609781967                          | 2.692587775                        | 0.217580487                        | 0.000187072                        |
| 0.004456677                          | 0.258402785                          | 1.028751543                        | 0.79302551                         | 6.50E-05                           |
| 0.006087529                          | 0.206264232                          | 1.207853886                        | 0.569096865                        | 4.33E-05                           |
| 0.005113091                          | 0.18734496                           | 1.312654582                        | 0.507700691                        | 3.17E-05                           |
| 0.014218762                          | 1.437043087                          | 6.146338257                        | 0.095139767                        | 0.000249738                        |
| 0.007939295                          | 0.471197382                          | 1.88383404                         | 0.367057604                        | 0.000107658                        |
| 0.003558552                          | 0.119514707                          | 0.951631574                        | 0.844159592                        | 2.04E-05                           |
| 0.00670732                           | 0.348386438                          | 1.802482728                        | 0.354222588                        | 5.10E-05                           |
| 0.008256027                          | 0.509945729                          | 2.349895727                        | 0.30689958                         | 0.000101927                        |
| 0.017580803                          | 0.750899006                          | 5.033901792                        | 0.106399806                        | 0.000151769                        |
| 0.005012563                          | 0.165236731                          | 1.144842396                        | 0.546756474                        | 2.97E-05                           |
| 0.002611961                          | 0.145192016                          | 0.969557582                        | 0.841570217                        | 1.34E-05                           |
| 0.003489558                          | 0.200012617                          | 1.190120994                        | 0.701015489                        | 2.42E-05                           |
| 0.003529533                          | 0.111092621                          | 0.716730636                        | 0.852595288                        | 2.12E-05                           |
| 0.004661984                          | 0.666684324                          | 2.482004453                        | 0.286410072                        | 5.83E-05                           |
| 0.004700813                          | 0.259459304                          | 1.231675172                        | 0.602882952                        | 5.53E-05                           |
| 0.029688339                          | 1.804815696                          | 7.552073498                        | 0.073549363                        | 0.000504695                        |
| 0.027406691                          | 1.405604835                          | 5.298907377                        | 0.109483563                        | 0.000605549                        |
| 0.001424514                          | 0.092757913                          | 0.484825194                        | 1.127571949                        | 1.09E-05                           |

| log.sigma.3.5.mm.3D_gldm_GrayLevelVariance | log.sigma.3.5.mm.3D_gldm_HighGrayLevelEmphasis | log.sigma.3.5.mm.3D_gldm_GrayLevelNonUniformityNormalized | log.sigma.3.5.mm.3D_gldm_DependenceEntropy |
|--------------------------------------------|------------------------------------------------|-----------------------------------------------------------|--------------------------------------------|
| 40.07578355                                | 352.2929363                                    | 0.046337505                                               | 6.819454942                                |
| 35.06234584                                | 256.0172911                                    | 0.054024201                                               | 6.160425148                                |
| 35.93258964                                | 265.4618834                                    | 0.046748376                                               | 6.598917095                                |
| 41.61556267                                | 268.8571429                                    | 0.046101616                                               | 6.223657621                                |
| 32.33261993                                | 213.2551382                                    | 0.050506776                                               | 6.560585255                                |
| 36.03749744                                | 300.5702479                                    | 0.047469435                                               | 6.10064995                                 |
| 16.76344875                                | 194.5108644                                    | 0.092988265                                               | 7.269583768                                |
| 28.68304141                                | 370.6708965                                    | 0.056028328                                               | 7.131516885                                |
| 21.16429147                                | 183.5682778                                    | 0.069665114                                               | 7.021928218                                |
| 21.14438139                                | 175.8913907                                    | 0.061139424                                               | 6.411841076                                |
| 11.40291623                                | 113.1715938                                    | 0.090200633                                               | 6.491127743                                |
| 17.86970247                                | 197.5256824                                    | 0.076309079                                               | 7.062552703                                |
| 38.09944034                                | 338.1023428                                    | 0.051616111                                               | 6.644339223                                |
| 39.61234134                                | 273.8354037                                    | 0.045026234                                               | 6.418572859                                |
| 28.43632794                                | 182.464127                                     | 0.05678448                                                | 6.800391798                                |
| 25.00920223                                | 158.5997917                                    | 0.068407649                                               | 7.296208731                                |
| 14.33828103                                | 104.7281993                                    | 0.07312018                                                | 6.412351349                                |
| 17.42336547                                | 211.7408313                                    | 0.049527442                                               | 6.232142067                                |
| 11.26059377                                | 88.42413163                                    | 0.087915136                                               | 6.515455094                                |
| 23.22186192                                | 355.1376456                                    | 0.063069434                                               | 7.170401683                                |
| 26.03772437                                | 181.7107796                                    | 0.055534353                                               | 6.795308434                                |
| 27.50584921                                | 196.8729839                                    | 0.057565362                                               | 6.210212401                                |
| 24.93135045                                | 210.3888889                                    | 0.058413946                                               | 6.523308282                                |
| 11.27642618                                | 110.99861                                      | 0.104444295                                               | 6.876321732                                |
| 32.20579197                                | 289.5887622                                    | 0.054174315                                               | 7.105368683                                |
| 32.79608736                                | 458.6952269                                    | 0.054659814                                               | 7.067979737                                |
| 31.79570873                                | 220.2000998                                    | 0.05190567                                                | 6.796972274                                |
| 18.73150501                                | 144.26498                                      | 0.066360599                                               | 6.692355372                                |
| 12.29705386                                | 79.17808219                                    | 0.092794145                                               | 5.469341406                                |
| 20.40068516                                | 161.552795                                     | 0.06179777                                                | 6.631149829                                |
| 24.79377338                                | 176.2451983                                    | 0.057010103                                               | 7.02405829                                 |
| 35.95804292                                | 308.501269                                     | 0.048516452                                               | 6.469056468                                |
| 25.34017873                                | 190.2783726                                    | 0.059717822                                               | 7.108823025                                |
| 22.34468252                                | 213.6542443                                    | 0.065548397                                               | 6.96267744                                 |
| 23.52021006                                | 222.4494448                                    | 0.061138986                                               | 7.056345404                                |
| 33.14712608                                | 378.1217122                                    | 0.04912572                                                | 6.889793253                                |
| 45.41619775                                | 531.2804233                                    | 0.043703284                                               | 6.708621699                                |
| 25.2423458                                 | 229.8979557                                    | 0.080500817                                               | 7.332264998                                |
| 16.49355867                                | 161.7821429                                    | 0.071192602                                               | 6.184457474                                |
| 16.56928107                                | 545.5498042                                    | 0.080859024                                               | 7.163123764                                |
| 28.52848908                                | 231.3783582                                    | 0.053128759                                               | 6.624666472                                |
| 10.28766541                                | 172.1854725                                    | 0.109385164                                               | 6.851932399                                |
| 39.35152745                                | 339.738627                                     | 0.044110856                                               | 6.973349977                                |
| 30.80070373                                | 202.3922535                                    | 0.050440389                                               | 6.64878238                                 |
| 15.30020412                                | 140.938946                                     | 0.091324899                                               | 6.867206302                                |
| 30.90622105                                | 237.4106622                                    | 0.050395322                                               | 6.924285312                                |
| 18.84575692                                | 250.7774248                                    | 0.06734626                                                | 7.009026148                                |
| 15.51839423                                | 141.6802444                                    | 0.077770542                                               | 6.247074985                                |
| 29.1213035                                 | 188.8107417                                    | 0.054231723                                               | 6.182158569                                |
| 34.91441675                                | 366.8473451                                    | 0.05272535                                                | 6.372137432                                |
| 29.40153673                                | 184.2657343                                    | 0.055394058                                               | 6.59497181                                 |
| 31.41447366                                | 304.7378815                                    | 0.051158005                                               | 6.822876124                                |
| 10.19803159                                | 115.2605316                                    | 0.1204244                                                 | 7.06090697                                 |
| 17.74342955                                | 340.7356882                                    | 0.068367503                                               | 6.775502609                                |
| 45.35648169                                | 284.7153966                                    | 0.043112935                                               | 6.514520375                                |
| 31.61805772                                | 195.5059524                                    | 0.051340009                                               | 6.612570948                                |
| 22.09280416                                | 213.2346202                                    | 0.062134306                                               | 7.039013594                                |
| 29.45054604                                | 286.6129657                                    | 0.051965728                                               | 6.764418792                                |
| 25.00931516                                | 195.3066841                                    | 0.055428922                                               | 6.442510714                                |
| 14.64468642                                | 282.7556229                                    | 0.094822677                                               | 7.205653889                                |
| 25.50635955                                | 250.6869827                                    | 0.056031425                                               | 6.7361111                                  |
| 33.66013866                                | 363.336714                                     | 0.048838053                                               | 6.89113207                                 |
| 31.18893839                                | 429.6456157                                    | 0.051605726                                               | 7.220440382                                |
| 30.08719421                                | 271.0920802                                    | 0.05170654                                                | 6.802094877                                |
| 21.15539274                                | 167.183161                                     | 0.060330025                                               | 6.51575821                                 |
| 31.79659925                                | 326.7503654                                    | 0.049576267                                               | 6.845487728                                |
| 29.63435779                                | 229.4458128                                    | 0.055133587                                               | 6.224148918                                |
| 27.21785783                                | 372.519764                                     | 0.056654919                                               | 6.880676296                                |
| 16.71297537                                | 191.8733351                                    | 0.071604176                                               | 7.01111346                                 |
| 24.23154865                                | 255.7612994                                    | 0.056958232                                               | 6.686817532                                |
| 28.35535643                                | 196.8800813                                    | 0.054200542                                               | 6.409190845                                |
| 27.04180532                                | 318.806063                                     | 0.060049066                                               | 7.085897521                                |
| 34.93714093                                | 199.6411985                                    | 0.048994375                                               | 6.61661015                                 |
| 24.48195125                                | 162.6557895                                    | 0.057480332                                               | 6.468421141                                |
| 19.0614569                                 | 191.9865328                                    | 0.083192118                                               | 7.043316187                                |
| 15.32005852                                | 152.2712418                                    | 0.070794234                                               | 6.301783029                                |
| 24.22518521                                | 293.1317338                                    | 0.057328543                                               | 6.693314509                                |
| 45.42301757                                | 448.0278638                                    | 0.049966932                                               | 6.157307259                                |
| 26.69709032                                | 247.3155894                                    | 0.055077275                                               | 6.70386063                                 |
| 15.81521944                                | 186.5094444                                    | 0.074958025                                               | 6.747307266                                |
| 39.02575277                                | 348.4203414                                    | 0.047315002                                               | 6.823172928                                |
| 25.20414612                                | 196.9854722                                    | 0.057868077                                               | 6.422238176                                |
| 25.6685396                                 | 171.2927257                                    | 0.057627387                                               | 6.954250761                                |
| 15.23127467                                | 153.3465399                                    | 0.073484233                                               | 6.527437591                                |
| 21.53823062                                | 199.9156538                                    | 0.067887088                                               | 7.045066965                                |
| 24.8100482                                 | 370.5178908                                    | 0.088533521                                               | 6.034240809                                |
| 26.4622904                                 | 257.3256881                                    | 0.054425133                                               | 6.696553447                                |
| 19.34226508                                | 148.5461418                                    | 0.081527182                                               | 7.155755984                                |
| 21.3134702                                 | 240.2351558                                    | 0.063209006                                               | 6.851454377                                |
| 28.79020747                                | 241.1989759                                    | 0.052523989                                               | 6.582474518                                |
| 27.81829039                                | 354.960199                                     | 0.058064776                                               | 6.767042944                                |
| 16.76453106                                | 177.5793839                                    | 0.07693186                                                | 6.939533539                                |
| 18.3540833                                 | 217.0444346                                    | 0.065711168                                               | 6.82278492                                 |
| 22.12972252                                | 191.5676146                                    | 0.0595024                                                 | 6.847473914                                |
| 15.21995101                                | 167.9482915                                    | 0.070179181                                               | 6.653368262                                |
| 43.56102695                                | 401.602349                                     | 0.042473453                                               | 6.912653521                                |
| 28.24481314                                | 216.6349918                                    | 0.051720272                                               | 6.759277695                                |
| 25.37386316                                | 296.7284345                                    | 0.062336045                                               | 5.978278502                                |
| 19.14819559                                | 181.4253731                                    | 0.079388505                                               | 5.753163733                                |
| 27.26987161                                | 397.1651179                                    | 0.054635543                                               | 7.141813633                                |

| log.sigma.3.5.mm.3D_gldm_DependenceNonUniformity | log.sigma.3.5.mm.3D_gldm_GrayLevelNonUniformity | log.sigma.3.5.mm.3D_gldm_SmallDependenceEmphasis |
|--------------------------------------------------|-------------------------------------------------|--------------------------------------------------|
| 315.1468144                                      | 66.91135734                                     | 0.356179227                                      |
| 88.60230548                                      | 18.74639769                                     | 0.343435374                                      |
| 220.6928251                                      | 41.69955157                                     | 0.342328762                                      |
| 84.67701863                                      | 14.8447205                                      | 0.381780538                                      |
| 327.8703047                                      | 71.26506024                                     | 0.296473426                                      |
| 61.04958678                                      | 11.48760331                                     | 0.396266609                                      |
| 1016.527659                                      | 980.003321                                      | 0.171641015                                      |
| 971.0698748                                      | 339.9798945                                     | 0.266765207                                      |
| 578.5598311                                      | 296.912717                                      | 0.219102728                                      |
| 154.9496689                                      | 46.1602649                                      | 0.288139779                                      |
| 239.2056555                                      | 140.3521851                                     | 0.187692094                                      |
| 427.6715586                                      | 259.9850308                                     | 0.216083651                                      |
| 162.3440197                                      | 41.86066584                                     | 0.309863202                                      |
| 165.9409938                                      | 28.99689441                                     | 0.436204131                                      |
| 278.7752381                                      | 89.43555556                                     | 0.304026685                                      |
| 685.0857341                                      | 394.1648733                                     | 0.215428906                                      |
| 155.9830125                                      | 64.56511891                                     | 0.198891175                                      |
| 102.7408313                                      | 20.25672372                                     | 0.411131933                                      |
| 152.4753199                                      | 96.17915905                                     | 0.18340744                                       |
| 1360.342916                                      | 579.1666122                                     | 0.244638126                                      |
| 388.4177093                                      | 115.400385                                      | 0.236714646                                      |
| 114.7137097                                      | 28.55241935                                     | 0.319391504                                      |
| 103.1469534                                      | 32.59498208                                     | 0.258877884                                      |
| 386.9099249                                      | 375.6861273                                     | 0.161407939                                      |
| 180.2296417                                      | 66.52605863                                     | 0.270871516                                      |
| 417.0446009                                      | 139.7104851                                     | 0.270797941                                      |
| 384.1546906                                      | 104.0189621                                     | 0.310961764                                      |
| 388.8375499                                      | 149.5104305                                     | 0.238837186                                      |
| 26.94520548                                      | 13.54794521                                     | 0.279122869                                      |
| 299.0757764                                      | 99.49440994                                     | 0.26454654                                       |
| 642.1224744                                      | 228.5535046                                     | 0.243449936                                      |
| 189.819797                                       | 38.23096447                                     | 0.363883812                                      |
| 356.7601713                                      | 139.4411135                                     | 0.253810176                                      |
| 343.9780538                                      | 158.2993789                                     | 0.24229329                                       |
| 805.7703098                                      | 313.8264173                                     | 0.24831142                                       |
| 400.8793192                                      | 95.2547705                                      | 0.324481348                                      |
| 381.7566138                                      | 66.07936508                                     | 0.374511864                                      |
| 619.8706408                                      | 468.5952585                                     | 0.21377642                                       |
| 116.0821429                                      | 39.86785714                                     | 0.23197324                                       |
| 1103.254472                                      | 763.8751985                                     | 0.191890837                                      |
| 271.9925373                                      | 71.19253731                                     | 0.300266495                                      |
| 623.280677                                       | 620.4326516                                     | 0.168469535                                      |
| 511.0132341                                      | 106.6600496                                     | 0.345680026                                      |
| 308.1169014                                      | 71.62535211                                     | 0.322503265                                      |
| 180.3791774                                      | 142.1015424                                     | 0.18853786                                       |
| 454.0845481                                      | 120.999167                                      | 0.318949288                                      |
| 768.5402728                                      | 360.3698374                                     | 0.218112136                                      |
| 80.14867617                                      | 38.18533605                                     | 0.248483456                                      |
| 99.62915601                                      | 21.20460358                                     | 0.338562092                                      |
| 113.7256637                                      | 23.83185841                                     | 0.327990087                                      |
| 252.0753691                                      | 71.29215229                                     | 0.347522801                                      |
| 590.8398564                                      | 142.4750449                                     | 0.311325585                                      |
| 633.8658475                                      | 960.505015                                      | 0.136556849                                      |
| 262.5761267                                      | 112.2594397                                     | 0.243879778                                      |
| 166.7542768                                      | 27.72161742                                     | 0.385029778                                      |
| 251.9727891                                      | 60.37585034                                     | 0.293658902                                      |
| 622.1088418                                      | 249.4692403                                     | 0.241065147                                      |
| 408.6516691                                      | 107.4131592                                     | 0.278935543                                      |
| 165.1179554                                      | 42.29226737                                     | 0.335154378                                      |
| 1052.561002                                      | 1032.903424                                     | 0.168262204                                      |
| 258.8254327                                      | 74.46576373                                     | 0.300656677                                      |
| 541.8275862                                      | 120.3858012                                     | 0.316254583                                      |
| 1379.97231                                       | 424.9215448                                     | 0.274730483                                      |
| 451.0639313                                      | 108.3769084                                     | 0.271398103                                      |
| 132.3441654                                      | 40.84342688                                     | 0.292776738                                      |
| 734.7211342                                      | 169.6004092                                     | 0.317852631                                      |
| 96.80788177                                      | 22.38423645                                     | 0.295024589                                      |
| 964.4941986                                      | 288.0902655                                     | 0.287788237                                      |
| 1037.664624                                      | 537.6041556                                     | 0.188940627                                      |
| 429.5998117                                      | 120.9792844                                     | 0.273082933                                      |
| 106.1544715                                      | 26.66666667                                     | 0.33009757                                       |
| 755.6974503                                      | 299.1043967                                     | 0.245515435                                      |
| 294.5925094                                      | 65.40749064                                     | 0.323537757                                      |
| 204.4526316                                      | 54.60631579                                     | 0.332645511                                      |
| 488.7301665                                      | 339.7566112                                     | 0.203312787                                      |
| 183.7647059                                      | 64.98910675                                     | 0.228268891                                      |
| 437.6871888                                      | 126.6387506                                     | 0.262226372                                      |
| 92.12074303                                      | 16.13931889                                     | 0.431889405                                      |
| 270.3505703                                      | 72.42661597                                     | 0.292901479                                      |
| 264.6155556                                      | 134.9244444                                     | 0.219266404                                      |
| 301.5675676                                      | 66.52489331                                     | 0.356143333                                      |
| 184.5859564                                      | 47.79903148                                     | 0.307699515                                      |
| 371.0438212                                      | 131.5056968                                     | 0.266598483                                      |
| 324.8235605                                      | 139.1056524                                     | 0.214141784                                      |
| 380.2883978                                      | 184.3134438                                     | 0.21559445                                       |
| 102.0508475                                      | 47.01129944                                     | 0.287237496                                      |
| 266.3577982                                      | 71.18807339                                     | 0.308092105                                      |
| 399.8373306                                      | 312.738269                                      | 0.19551346                                       |
| 280.3697825                                      | 107.5185185                                     | 0.26151428                                       |
| 308.4264813                                      | 71.80029261                                     | 0.300314755                                      |
| 138.5273632                                      | 46.6840796                                      | 0.246164835                                      |
| 304.2669826                                      | 194.7914692                                     | 0.211956696                                      |
| 759.6114197                                      | 295.7682737                                     | 0.239184115                                      |
| 602.7701683                                      | 205.0452699                                     | 0.235383797                                      |
| 555.0127003                                      | 232.0825522                                     | 0.224172976                                      |
| 549.3800336                                      | 101.2567114                                     | 0.354937721                                      |
| 505.8083197                                      | 126.8181077                                     | 0.269730699                                      |
| 73.5686901                                       | 19.51118211                                     | 0.342779498                                      |
| 62.94776119                                      | 21.2761194                                      | 0.266572283                                      |
| 1478.132593                                      | 482.1040345                                     | 0.270177147                                      |

| log.sigma.3.5.mm.3D_gldm_DependenceNonUniformityNormalized | log.sigma.3.5.mm.3D_gldm_DependenceVariance | log.sigma.3.5.mm.3D_gldm_LargeDependenceEmphasis |
|------------------------------------------------------------|---------------------------------------------|--------------------------------------------------|
| 0.218245716                                                | 2.352402913                                 | 9.394736842                                      |
| 0.255338056                                                | 1.314021377                                 | 7.328530259                                      |
| 0.247413481                                                | 1.816414969                                 | 8.213004484                                      |
| 0.262972108                                                | 1.394544964                                 | 6.906832298                                      |
| 0.232367332                                                | 1.657884969                                 | 8.899362155                                      |
| 0.25227102                                                 | 1.520661157                                 | 7.107438017                                      |
| 0.096453901                                                | 23.57926919                                 | 58.10200209                                      |
| 0.160031291                                                | 7.00230284                                  | 19.80520765                                      |
| 0.135748435                                                | 11.60282271                                 | 30.01501642                                      |
| 0.20523135                                                 | 2.19894566                                  | 10.52847682                                      |
| 0.153731141                                                | 4.730597538                                 | 19.55012853                                      |
| 0.125527314                                                | 11.18550518                                 | 30.9823892                                       |
| 0.200177583                                                | 2.690520753                                 | 11.03699137                                      |
| 0.257672351                                                | 1.588200687                                 | 6.770186335                                      |
| 0.177000151                                                | 3.82194971                                  | 13.70349206                                      |
| 0.118897212                                                | 15.65920818                                 | 38.33148212                                      |
| 0.176651203                                                | 3.035954079                                 | 15.27406569                                      |
| 0.251200077                                                | 1.767038695                                 | 7.356968215                                      |
| 0.13937415                                                 | 5.332516736                                 | 21.83363803                                      |
| 0.148137092                                                | 6.659593694                                 | 20.88652946                                      |
| 0.186919013                                                | 3.049399687                                 | 13.54475457                                      |
| 0.23127764                                                 | 1.5316077                                   | 8.358870968                                      |
| 0.184851171                                                | 2.752598245                                 | 12.65591398                                      |
| 0.107564616                                                | 14.52910292                                 | 41.80845149                                      |
| 0.146766809                                                | 12.94460684                                 | 29.50977199                                      |
| 0.163162989                                                | 4.638558267                                 | 16.20813772                                      |
| 0.191693957                                                | 2.584283529                                 | 11.10578842                                      |
| 0.172586573                                                | 4.527932082                                 | 16.42476698                                      |
| 0.184556202                                                | 3.108087821                                 | 12.8630137                                       |
| 0.185761352                                                | 2.843885653                                 | 12.61242236                                      |
| 0.160170236                                                | 5.038034589                                 | 17.61761038                                      |
| 0.240888067                                                | 1.576631709                                 | 7.687817259                                      |
| 0.152788082                                                | 7.392901797                                 | 21.4385439                                       |
| 0.142433977                                                | 7.51028021                                  | 22.69606625                                      |
| 0.156978436                                                | 7.52170363                                  | 21.26495227                                      |
| 0.206745394                                                | 3.618869592                                 | 12.03455389                                      |
| 0.252484533                                                | 1.496771857                                 | 7.260582011                                      |
| 0.106488686                                                | 22.97408051                                 | 52.79007043                                      |
| 0.207289541                                                | 2.150395408                                 | 11.65                                            |
| 0.116783579                                                | 11.77885592                                 | 33.98253414                                      |
| 0.202979505                                                | 2.263642237                                 | 10.46716418                                      |
| 0.109887284                                                | 14.74828955                                 | 40.54795487                                      |
| 0.211337152                                                | 2.502299749                                 | 9.925558313                                      |
| 0.216983733                                                | 2.120650665                                 | 9.509859155                                      |
| 0.115924921                                                | 14.01782634                                 | 37.47429306                                      |
| 0.189123094                                                | 4.00799646                                  | 13.21407747                                      |
| 0.143625542                                                | 6.420064386                                 | 21.58942254                                      |
| 0.163235593                                                | 3.252384053                                 | 14.75152749                                      |
| 0.254806026                                                | 1.271237106                                 | 7.31202046                                       |
| 0.251605451                                                | 1.360541154                                 | 7.654867257                                      |
| 0.195862758                                                | 3.034926396                                 | 11.17094017                                      |
| 0.212150756                                                | 2.074791538                                 | 9.728904847                                      |
| 0.079471646                                                | 22.2407785                                  | 64.94182548                                      |
| 0.159912379                                                | 4.229290206                                 | 16.46650426                                      |
| 0.259337911                                                | 1.735067687                                 | 7.404354588                                      |
| 0.214262576                                                | 2.010687098                                 | 9.894557823                                      |
| 0.154946162                                                | 8.815052892                                 | 23.63611457                                      |
| 0.197702791                                                | 2.534771652                                 | 11.43057571                                      |
| 0.216406233                                                | 2.554780485                                 | 9.99344692                                       |
| 0.096627284                                                | 23.13391775                                 | 57.20508583                                      |
| 0.194752019                                                | 3.194656901                                 | 12.10458992                                      |
| 0.219808351                                                | 3.705620842                                 | 11.92494929                                      |
| 0.167594402                                                | 6.311821415                                 | 18.26524168                                      |
| 0.215202257                                                | 2.310041664                                 | 10.79103053                                      |
| 0.195486212                                                | 3.060421662                                 | 11.98966027                                      |
| 0.214767943                                                | 2.023556552                                 | 9.482315113                                      |
| 0.238443059                                                | 1.372151714                                 | 8.448275862                                      |
| 0.189674375                                                | 3.111460569                                 | 12.38249754                                      |
| 0.138207862                                                | 6.546282864                                 | 23.47575919                                      |
| 0.202259798                                                | 2.341185483                                 | 11.10546139                                      |
| 0.215761121                                                | 1.956656091                                 | 9.264227642                                      |
| 0.151716011                                                | 6.639991736                                 | 20.71491668                                      |
| 0.220668546                                                | 1.981363745                                 | 9.200749064                                      |
| 0.215213296                                                | 2.325810526                                 | 9.724210526                                      |
| 0.119669482                                                | 11.91104029                                 | 33.25073457                                      |
| 0.200179418                                                | 2.294283775                                 | 12.1503268                                       |
| 0.198138157                                                | 2.351834065                                 | 11.46627433                                      |
| 0.285203539                                                | 1.113209175                                 | 5.743034056                                      |
| 0.205589787                                                | 2.003779728                                 | 10.10570342                                      |
| 0.147008642                                                | 5.82251358                                  | 20.44888889                                      |
| 0.214486179                                                | 2.400290161                                 | 9.551920341                                      |
| 0.223469681                                                | 2.290093745                                 | 9.869249395                                      |
| 0.16259589                                                 | 9.938289291                                 | 23.81244522                                      |
| 0.17159195                                                 | 3.551085002                                 | 15.63708399                                      |
| 0.140069391                                                | 8.103027651                                 | 24.6228361                                       |
| 0.192186153                                                | 3.012487543                                 | 12.17137476                                      |
| 0.20363746                                                 | 2.825461287                                 | 11.16819572                                      |
| 0.104232881                                                | 16.47924742                                 | 43.94056309                                      |
| 0.164826445                                                | 4.908320001                                 | 16.81305115                                      |
| 0.225622883                                                | 1.780448218                                 | 9.158010241                                      |
| 0.172297715                                                | 3.216745873                                 | 14.17910448                                      |
| 0.120168635                                                | 8.438412335                                 | 27.58767773                                      |
| 0.168765034                                                | 3.7117772                                   | 15.32259498                                      |
| 0.174918795                                                | 3.417728934                                 | 14.66337783                                      |
| 0.167829664                                                | 3.564626043                                 | 15.62171152                                      |
| 0.230444645                                                | 1.825976307                                 | 8.347315436                                      |
| 0.20628398                                                 | 2.054144301                                 | 10.65252855                                      |
| 0.235043738                                                | 1.628045606                                 | 8.111821086                                      |
| 0.234879706                                                | 1.546892404                                 | 9.253731343                                      |
| 0.16751276                                                 | 5.133271402                                 | 16.76767906                                      |

|                                                              |                                                               |                                                               |
|--------------------------------------------------------------|---------------------------------------------------------------|---------------------------------------------------------------|
| log.sigma.3.5.mm.3D_gldm_LargeDependenceLowGrayLevelEmphasis | log.sigma.3.5.mm.3D_gldm_SmallDependenceHighGrayLevelEmphasis | log.sigma.3.5.mm.3D_gldm_LargeDependenceHighGrayLevelEmphasis |
| 0.04944897                                                   | 148.615086                                                    | 2717.24169                                                    |
| 0.099395708                                                  | 85.39335536                                                   | 1974.340058                                                   |
| 0.086908371                                                  | 94.2187321                                                    | 2143.107623                                                   |
| 0.230327209                                                  | 124.142795                                                    | 1555.447205                                                   |
| 0.14455159                                                   | 70.6741558                                                    | 1679.803685                                                   |
| 0.051636929                                                  | 117.8860135                                                   | 2022.355372                                                   |
| 0.357904908                                                  | 39.82814484                                                   | 10564.06281                                                   |
| 0.071517159                                                  | 116.1492743                                                   | 6605.567073                                                   |
| 0.254115968                                                  | 52.89368993                                                   | 4697.774754                                                   |
| 0.151166519                                                  | 58.75400582                                                   | 1638.291391                                                   |
| 0.269231449                                                  | 24.46840116                                                   | 1946.765424                                                   |
| 0.225044723                                                  | 53.68751413                                                   | 5326.227766                                                   |
| 0.057566139                                                  | 89.66933606                                                   | 4473.628853                                                   |
| 0.106836511                                                  | 137.1262293                                                   | 1435.282609                                                   |
| 0.188690498                                                  | 74.75468282                                                   | 1760.385397                                                   |
| 0.529058621                                                  | 39.03418864                                                   | 5234.453662                                                   |
| 0.416017863                                                  | 24.82698189                                                   | 1385.613817                                                   |
| 0.238503963                                                  | 98.41530374                                                   | 1221.031785                                                   |
| 0.547084832                                                  | 21.32545106                                                   | 1732.577697                                                   |
| 0.073452603                                                  | 92.31682362                                                   | 6962.735381                                                   |
| 0.240149777                                                  | 46.85974976                                                   | 2165.551973                                                   |
| 0.205405507                                                  | 70.69818561                                                   | 1397.824597                                                   |
| 0.15812685                                                   | 66.96437101                                                   | 2309.012545                                                   |
| 0.554760094                                                  | 23.79398871                                                   | 4157.463998                                                   |
| 0.14270859                                                   | 87.14990097                                                   | 8380.766287                                                   |
| 0.053399178                                                  | 147.9017795                                                   | 6260.75313                                                    |
| 0.124328791                                                  | 87.97458752                                                   | 1899.076347                                                   |
| 0.24931232                                                   | 43.63631447                                                   | 2022.281846                                                   |
| 0.377996655                                                  | 30.84496934                                                   | 668.6575342                                                   |
| 0.205007389                                                  | 53.01317566                                                   | 1669.771429                                                   |
| 0.220936589                                                  | 52.06080224                                                   | 2570.629833                                                   |
| 0.065987205                                                  | 114.658489                                                    | 2146.643401                                                   |
| 0.21604158                                                   | 57.66278082                                                   | 3346.747752                                                   |
| 0.157493063                                                  | 57.74729484                                                   | 4660.628157                                                   |
| 0.153596393                                                  | 70.03554051                                                   | 3854.159556                                                   |
| 0.050840442                                                  | 124.5689867                                                   | 4490.298092                                                   |
| 0.02607358                                                   | 197.327468                                                    | 3918.085979                                                   |
| 0.302861266                                                  | 57.3216486                                                    | 11301.45405                                                   |
| 0.151090359                                                  | 43.04921077                                                   | 1857.221429                                                   |
| 0.068580559                                                  | 118.2612934                                                   | 17724.24103                                                   |
| 0.105318575                                                  | 84.79238005                                                   | 1899.557463                                                   |
| 0.285253262                                                  | 35.4952746                                                    | 6360.868124                                                   |
| 0.070496056                                                  | 120.1971669                                                   | 3120.82713                                                    |
| 0.14550644                                                   | 78.23937474                                                   | 1472.259859                                                   |
| 0.398886691                                                  | 36.61821793                                                   | 4615.640746                                                   |
| 0.139111628                                                  | 91.59557592                                                   | 2309.303207                                                   |
| 0.123229968                                                  | 65.95501062                                                   | 4747.175855                                                   |
| 0.247748158                                                  | 41.48702978                                                   | 2011.415479                                                   |
| 0.120544104                                                  | 74.81863313                                                   | 1169.859335                                                   |
| 0.037787702                                                  | 113.4627377                                                   | 2946.236726                                                   |
| 0.190738353                                                  | 84.65191587                                                   | 1357.381507                                                   |
| 0.063212991                                                  | 104.3455154                                                   | 2647.922083                                                   |
| 0.707985736                                                  | 20.26838244                                                   | 7074.335507                                                   |
| 0.060510396                                                  | 87.74614252                                                   | 5424.704019                                                   |
| 0.151737506                                                  | 116.1809469                                                   | 2057.060653                                                   |
| 0.165828187                                                  | 64.99906014                                                   | 1608.941327                                                   |
| 0.168852967                                                  | 62.51656079                                                   | 4460.639851                                                   |
| 0.075383753                                                  | 85.06203375                                                   | 2935.167392                                                   |
| 0.167968875                                                  | 75.28445746                                                   | 1471.568807                                                   |
| 0.224889205                                                  | 57.40556885                                                   | 15510.52336                                                   |
| 0.081199141                                                  | 85.30178922                                                   | 2719.296464                                                   |
| 0.049005003                                                  | 120.6752777                                                   | 4091.079513                                                   |
| 0.057754111                                                  | 128.39103                                                     | 6976.576391                                                   |
| 0.090287445                                                  | 79.49267835                                                   | 2799.379294                                                   |
| 0.159326405                                                  | 51.77658566                                                   | 1723.564254                                                   |
| 0.05445467                                                   | 110.1028542                                                   | 2970.246419                                                   |
| 0.245430212                                                  | 66.94355688                                                   | 1931.844828                                                   |
| 0.050384355                                                  | 123.2237006                                                   | 3937.527827                                                   |
| 0.183906223                                                  | 42.41578384                                                   | 4091.31553                                                    |
| 0.065159721                                                  | 68.23440172                                                   | 2999.101224                                                   |
| 0.135424027                                                  | 73.34001666                                                   | 1643.392276                                                   |
| 0.094210454                                                  | 90.12886194                                                   | 6032.291708                                                   |
| 0.180325483                                                  | 76.77594391                                                   | 1384.992509                                                   |
| 0.154873435                                                  | 63.19617623                                                   | 1249.036842                                                   |
| 0.255752144                                                  | 51.17288067                                                   | 5506.514447                                                   |
| 0.147801207                                                  | 35.87803955                                                   | 1783.454248                                                   |
| 0.062332666                                                  | 75.20953079                                                   | 3417.472159                                                   |
| 0.037877841                                                  | 192.8864792                                                   | 2629.043344                                                   |
| 0.078961774                                                  | 75.60725597                                                   | 2451.565019                                                   |
| 0.160880119                                                  | 51.50087175                                                   | 3373.311667                                                   |
| 0.049376283                                                  | 145.5767852                                                   | 2750.265292                                                   |
| 0.15898774                                                   | 60.18212872                                                   | 2019.871671                                                   |
| 0.285556626                                                  | 54.79465301                                                   | 3646.40929                                                    |
| 0.189305582                                                  | 41.58360291                                                   | 1953.799789                                                   |
| 0.193268093                                                  | 52.09870032                                                   | 4219.28582                                                    |
| 0.041640721                                                  | 87.94041756                                                   | 5283.290019                                                   |
| 0.083161579                                                  | 91.45731347                                                   | 2382.293578                                                   |
| 0.494887791                                                  | 39.72020516                                                   | 5439.149374                                                   |
| 0.108223895                                                  | 67.94257965                                                   | 3648.032922                                                   |
| 0.078179409                                                  | 79.38306023                                                   | 2100.84199                                                    |
| 0.06146504                                                   | 90.89166829                                                   | 4799.174129                                                   |
| 0.257560597                                                  | 50.52340084                                                   | 4251.642575                                                   |
| 0.109922823                                                  | 57.57165825                                                   | 3026.603644                                                   |
| 0.153883277                                                  | 51.92320154                                                   | 2486.691817                                                   |
| 0.158534086                                                  | 42.47679887                                                   | 2265.232235                                                   |
| 0.044224565                                                  | 145.7807836                                                   | 3255.586409                                                   |
| 0.115092043                                                  | 61.971087                                                     | 2177.064845                                                   |
| 0.058135759                                                  | 101.6080014                                                   | 2384.217252                                                   |
| 0.18045775                                                   | 49.55659532                                                   | 1774.238806                                                   |
| 0.053163815                                                  | 104.9311082                                                   | 6644.327403                                                   |

| log.sigma.3.5.mm.3D_gldm_SmallDependenceLowGrayLevelEmphasis | log.sigma.3.5.mm.3D_gldm_LowGrayLevelEmphasis | log.sigma.3.5.mm.3D_gldm_DistanceZoneVariabilityNormalized |
|--------------------------------------------------------------|-----------------------------------------------|------------------------------------------------------------|
| 0.002727478                                                  | 0.006214895                                   | 0.891996432                                                |
| 0.008091455                                                  | 0.016519126                                   | 0.934715121                                                |
| 0.005463628                                                  | 0.013781798                                   | 0.884856889                                                |
| 0.007768994                                                  | 0.02790182                                    | 0.887899654                                                |
| 0.003921272                                                  | 0.013697005                                   | 0.889273356                                                |
| 0.009833665                                                  | 0.013786449                                   | 0.847222222                                                |
| 0.001696696                                                  | 0.00816519                                    | 0.947406866                                                |
| 0.001133991                                                  | 0.004015911                                   | 0.889550222                                                |
| 0.001758191                                                  | 0.009861885                                   | 0.958614363                                                |
| 0.004265506                                                  | 0.015914294                                   | 0.939223376                                                |
| 0.003640936                                                  | 0.016432536                                   | 0.956066153                                                |
| 0.002096515                                                  | 0.008427738                                   | 0.929319001                                                |
| 0.005272214                                                  | 0.00950726                                    | 0.830405827                                                |
| 0.005320624                                                  | 0.012672743                                   | 0.814344736                                                |
| 0.003733567                                                  | 0.013283797                                   | 0.940718648                                                |
| 0.004570117                                                  | 0.021595733                                   | 0.958467457                                                |
| 0.004402977                                                  | 0.025724016                                   | 0.960991065                                                |
| 0.010510631                                                  | 0.02908834                                    | 0.835458701                                                |
| 0.005503538                                                  | 0.031454896                                   | 0.9561624                                                  |
| 0.001344186                                                  | 0.004216603                                   | 0.95179057                                                 |
| 0.003398627                                                  | 0.01525898                                    | 0.931475949                                                |
| 0.005403141                                                  | 0.018223262                                   | 0.885047897                                                |
| 0.004385423                                                  | 0.012304399                                   | 0.975907198                                                |
| 0.002862145                                                  | 0.018214104                                   | 0.957466919                                                |
| 0.002841085                                                  | 0.008021698                                   | 0.950281133                                                |
| 0.000939117                                                  | 0.003760599                                   | 0.931626342                                                |
| 0.003876681                                                  | 0.011498816                                   | 0.930939751                                                |
| 0.00396797                                                   | 0.017021046                                   | 0.95011072                                                 |
| 0.020208989                                                  | 0.04008165                                    | 0.82                                                       |
| 0.003944134                                                  | 0.016205746                                   | 0.980546624                                                |
| 0.002732242                                                  | 0.012583463                                   | 0.953474712                                                |
| 0.004280858                                                  | 0.009152617                                   | 0.876881142                                                |
| 0.003768044                                                  | 0.012458243                                   | 0.877410773                                                |
| 0.002321377                                                  | 0.008464857                                   | 0.960187141                                                |
| 0.002195324                                                  | 0.008017631                                   | 0.938971664                                                |
| 0.00221666                                                   | 0.00548502                                    | 0.789200139                                                |
| 0.00193207                                                   | 0.004158015                                   | 0.68069431                                                 |
| 0.001793855                                                  | 0.008353454                                   | 0.942906574                                                |
| 0.003811125                                                  | 0.016438625                                   | 0.883492149                                                |
| 0.000491356                                                  | 0.002194671                                   | 0.933538885                                                |
| 0.002853467                                                  | 0.009662569                                   | 0.866830458                                                |
| 0.00149376                                                   | 0.008220955                                   | 0.890346272                                                |
| 0.002394281                                                  | 0.007090866                                   | 0.937867766                                                |
| 0.004046467                                                  | 0.014202786                                   | 0.917110871                                                |
| 0.00387061                                                   | 0.015390468                                   | 0.953106259                                                |
| 0.002492405                                                  | 0.009352287                                   | 0.925485247                                                |
| 0.001329254                                                  | 0.00596646                                    | 0.948603063                                                |
| 0.004536452                                                  | 0.018794458                                   | 0.986302021                                                |
| 0.007117801                                                  | 0.016957918                                   | 0.898024311                                                |
| 0.004673987                                                  | 0.008381185                                   | 0.95791421                                                 |
| 0.004509302                                                  | 0.015635771                                   | 0.973836375                                                |
| 0.002027884                                                  | 0.00691702                                    | 0.907071608                                                |
| 0.002421961                                                  | 0.015488098                                   | 0.926624478                                                |
| 0.001650559                                                  | 0.004503432                                   | 0.95791421                                                 |
| 0.005977789                                                  | 0.019492092                                   | 0.925346404                                                |
| 0.004427859                                                  | 0.014606264                                   | 0.925864422                                                |
| 0.001897404                                                  | 0.008124054                                   | 0.947848913                                                |
| 0.002151194                                                  | 0.00655851                                    | 0.924275135                                                |
| 0.004617269                                                  | 0.01348264                                    | 0.863834478                                                |
| 0.000875868                                                  | 0.004666987                                   | 0.925506562                                                |
| 0.002943866                                                  | 0.00788755                                    | 0.956109954                                                |
| 0.002139562                                                  | 0.005195228                                   | 0.896491445                                                |
| 0.001096167                                                  | 0.003534102                                   | 0.855749757                                                |
| 0.003283063                                                  | 0.010179769                                   | 0.824363847                                                |
| 0.010204707                                                  | 0.019655389                                   | 0.933134686                                                |
| 0.002663909                                                  | 0.006536991                                   | 0.843585052                                                |
| 0.005153092                                                  | 0.022062693                                   | 0.863249403                                                |
| 0.001281906                                                  | 0.004105665                                   | 0.852101455                                                |
| 0.00172219                                                   | 0.008346914                                   | 0.948344081                                                |
| 0.00266864                                                   | 0.007442411                                   | 0.924237255                                                |
| 0.005649823                                                  | 0.015622469                                   | 0.930438941                                                |
| 0.00136051                                                   | 0.005101523                                   | 0.930339239                                                |
| 0.005005576                                                  | 0.017261661                                   | 0.965983728                                                |
| 0.007425727                                                  | 0.017585902                                   | 0.974558933                                                |
| 0.002054785                                                  | 0.009832879                                   | 0.820173748                                                |
| 0.003456179                                                  | 0.014670231                                   | 0.970266999                                                |
| 0.002163915                                                  | 0.006832564                                   | 0.911669784                                                |
| 0.005769652                                                  | 0.009722362                                   | 0.807666105                                                |
| 0.003531542                                                  | 0.010223601                                   | 0.905583363                                                |
| 0.002381235                                                  | 0.009757075                                   | 0.973219222                                                |
| 0.002671536                                                  | 0.005995341                                   | 0.903320929                                                |
| 0.004253968                                                  | 0.017217042                                   | 0.96846236                                                 |
| 0.004311787                                                  | 0.016245405                                   | 0.973014498                                                |
| 0.002657184                                                  | 0.011776038                                   | 0.970345705                                                |
| 0.002171142                                                  | 0.009463442                                   | 0.890358654                                                |
| 0.003867247                                                  | 0.006843853                                   | 0.875555556                                                |
| 0.002905848                                                  | 0.008052145                                   | 0.91087481                                                 |
| 0.00227881                                                   | 0.014651752                                   | 0.970018483                                                |
| 0.003195773                                                  | 0.009264466                                   | 0.930493395                                                |
| 0.003149804                                                  | 0.009161042                                   | 0.946195066                                                |
| 0.002751242                                                  | 0.006389619                                   | 0.790095066                                                |
| 0.002030376                                                  | 0.010160475                                   | 0.941516628                                                |
| 0.001927907                                                  | 0.007639793                                   | 0.916635482                                                |
| 0.002537904                                                  | 0.010640384                                   | 0.929173875                                                |
| 0.002463082                                                  | 0.010049894                                   | 0.894356576                                                |
| 0.001958346                                                  | 0.005740702                                   | 0.784492509                                                |
| 0.003316384                                                  | 0.012124191                                   | 0.87010031                                                 |
| 0.005464097                                                  | 0.010025086                                   | 0.89956382                                                 |
| 0.005363882                                                  | 0.023289066                                   | 0.895061728                                                |
| 0.001220025                                                  | 0.003757966                                   | 0.882891022                                                |

| log.sigma.3.5.mm.3D_gldzm_LowIntensityEmphasis | log.sigma.3.5.mm.3D_gldzm_LargeDistanceEmphasis | log.sigma.3.5.mm.3D_gldzm_HighIntensitySmallDistanceEmphasis |
|------------------------------------------------|-------------------------------------------------|--------------------------------------------------------------|
| 0.007476859                                    | 1.171849427                                     | 396.8686579                                                  |
| 0.022417966                                    | 1.101351351                                     | 234.625                                                      |
| 0.015950581                                    | 1.184                                           | 268.858                                                      |
| 0.022804243                                    | 1.178807947                                     | 313.4519868                                                  |
| 0.013065468                                    | 1.176470588                                     | 233.7828431                                                  |
| 0.021517321                                    | 1.125                                           | 284.1520833                                                  |
| 0.009930668                                    | 1.081081081                                     | 230.9755528                                                  |
| 0.004171181                                    | 1.176                                           | 425.9881333                                                  |
| 0.00821759                                     | 1.063419118                                     | 248.6091452                                                  |
| 0.017559528                                    | 1.094117647                                     | 200.4264706                                                  |
| 0.019680379                                    | 1.06741573                                      | 133.0351124                                                  |
| 0.009405146                                    | 1.110059172                                     | 247.0005917                                                  |
| 0.015292465                                    | 1.280645161                                     | 280.1153226                                                  |
| 0.012090922                                    | 1.310650888                                     | 303.7995562                                                  |
| 0.012242187                                    | 1.091726619                                     | 244.948741                                                   |
| 0.02201116                                     | 1.063649222                                     | 181.4729491                                                  |
| 0.024023487                                    | 1.059701493                                     | 130.4029851                                                  |
| 0.027291329                                    | 1.271356784                                     | 235.0753769                                                  |
| 0.031524967                                    | 1.067264574                                     | 117.0627803                                                  |
| 0.005441045                                    | 1.074146724                                     | 374.1240683                                                  |
| 0.014234527                                    | 1.106571936                                     | 198.1771758                                                  |
| 0.016918776                                    | 1.183673469                                     | 216.0127551                                                  |
| 0.01616084                                     | 1.036585366                                     | 259.4969512                                                  |
| 0.020323199                                    | 1.065217391                                     | 154.5636646                                                  |
| 0.010388761                                    | 1.076530612                                     | 317.8450255                                                  |
| 0.00396753                                     | 1.106329114                                     | 543.6132911                                                  |
| 0.0123201                                      | 1.107438017                                     | 276.1866391                                                  |
| 0.017867204                                    | 1.0768                                          | 185.7184                                                     |
| 0.065601933                                    | 1.3                                             | 108.91                                                       |
| 0.016479765                                    | 1.029469548                                     | 197                                                          |
| 0.011189291                                    | 1.071491615                                     | 218.2266108                                                  |
| 0.011183952                                    | 1.197707736                                     | 311.9899713                                                  |
| 0.014566075                                    | 1.196793003                                     | 224.4435131                                                  |
| 0.009407815                                    | 1.06095791                                      | 237.0870827                                                  |
| 0.008769769                                    | 1.094520548                                     | 281.0664384                                                  |
| 0.006711328                                    | 1.359210526                                     | 366.6611842                                                  |
| 0.004943394                                    | 1.598265896                                     | 491.003974                                                   |
| 0.00860352                                     | 1.088235294                                     | 266.7862395                                                  |
| 0.019266106                                    | 1.186335404                                     | 184.9440994                                                  |
| 0.002476971                                    | 1.103244838                                     | 614.5773107                                                  |
| 0.009247157                                    | 1.215189873                                     | 278.1344937                                                  |
| 0.009570916                                    | 1.174647887                                     | 209.5816901                                                  |
| 0.006859805                                    | 1.096288867                                     | 350.0549147                                                  |
| 0.013333667                                    | 1.129963899                                     | 238.8131769                                                  |
| 0.020490737                                    | 1.072072072                                     | 195.5938438                                                  |
| 0.007989838                                    | 1.11627907                                      | 284.5542636                                                  |
| 0.006124937                                    | 1.07918552                                      | 302.515083                                                   |
| 0.020849522                                    | 1.020689655                                     | 164.4896552                                                  |
| 0.019188341                                    | 1.161676647                                     | 218.1616766                                                  |
| 0.012795645                                    | 1.064516129                                     | 348.8534946                                                  |
| 0.014192743                                    | 1.039772727                                     | 240.0359848                                                  |
| 0.007138611                                    | 1.146551724                                     | 328.8235153                                                  |
| 0.018807531                                    | 1.114427861                                     | 151.990257                                                   |
| 0.006479783                                    | 1.064516129                                     | 357.7225806                                                  |
| 0.017619636                                    | 1.116504854                                     | 296.3624595                                                  |
| 0.014482367                                    | 1.115662651                                     | 224.2662651                                                  |
| 0.007822703                                    | 1.080380294                                     | 259.4991357                                                  |
| 0.007450964                                    | 1.118248175                                     | 303.0547445                                                  |
| 0.013400337                                    | 1.220447284                                     | 219.2907348                                                  |
| 0.005235828                                    | 1.116244411                                     | 340.5730253                                                  |
| 0.009374708                                    | 1.067346939                                     | 275.2826531                                                  |
| 0.006353921                                    | 1.164256198                                     | 366.5147211                                                  |
| 0.003947118                                    | 1.234743542                                     | 448.1758705                                                  |
| 0.01234405                                     | 1.291845494                                     | 282.9531474                                                  |
| 0.032373099                                    | 1.103896104                                     | 179.9989177                                                  |
| 0.008031619                                    | 1.256564141                                     | 330.685859                                                   |
| 0.021407516                                    | 1.22147651                                      | 221.2399329                                                  |
| 0.004350898                                    | 1.243916242                                     | 410.0198076                                                  |
| 0.009208537                                    | 1.079595704                                     | 227.6577701                                                  |
| 0.009362425                                    | 1.118309859                                     | 245.2901408                                                  |
| 0.016464552                                    | 1.108247423                                     | 221.6159794                                                  |
| 0.00533644                                     | 1.108408617                                     | 368.5955525                                                  |
| 0.01607238                                     | 1.051923077                                     | 239.6134615                                                  |
| 0.021033462                                    | 1.038659794                                     | 187.820232                                                   |
| 0.010642184                                    | 1.299674267                                     | 249.4660695                                                  |
| 0.017213239                                    | 1.045283019                                     | 159.7160377                                                  |
| 0.008790474                                    | 1.138929088                                     | 281.8180174                                                  |
| 0.012642443                                    | 1.323353293                                     | 427.5404192                                                  |
| 0.012528481                                    | 1.149028078                                     | 253.3693305                                                  |
| 0.011977488                                    | 1.040723982                                     | 240.9366516                                                  |
| 0.007228851                                    | 1.152801358                                     | 393.5878608                                                  |
| 0.016020683                                    | 1.048076923                                     | 194.6009615                                                  |
| 0.015891106                                    | 1.041039672                                     | 208.3142955                                                  |
| 0.012202407                                    | 1.04516129                                      | 198.2107527                                                  |
| 0.009934466                                    | 1.174626866                                     | 242.4820896                                                  |
| 0.012541928                                    | 1.2                                             | 290.8388889                                                  |
| 0.009077138                                    | 1.140243902                                     | 293.6920732                                                  |
| 0.012229478                                    | 1.045667447                                     | 210.8665105                                                  |
| 0.012831886                                    | 1.108159393                                     | 257.8178368                                                  |
| 0.01001515                                     | 1.083003953                                     | 261.9288538                                                  |
| 0.010490045                                    | 1.357446809                                     | 348.5638298                                                  |
| 0.009558386                                    | 1.090452261                                     | 239.2943886                                                  |
| 0.008408388                                    | 1.130744849                                     | 239.8474643                                                  |
| 0.010655356                                    | 1.110294118                                     | 221.1622899                                                  |
| 0.011051726                                    | 1.167857143                                     | 187.6720238                                                  |
| 0.005904038                                    | 1.372930867                                     | 385.4223466                                                  |
| 0.012817545                                    | 1.209476309                                     | 223.6165835                                                  |
| 0.014700647                                    | 1.159090909                                     | 294.6212121                                                  |
| 0.027307857                                    | 1.166666667                                     | 174.4333333                                                  |
| 0.004485802                                    | 1.187365398                                     | 375.2431802                                                  |

| log.sigma.3.5.mm.3D_gldzm_LowIntensityLargeDistanceEmphasis | log.sigma.3.5.mm.3D_gldzm_HighIntensityEmphasis | log.sigma.3.5.mm.3D_gldzm_DistanceZoneVariability | log.sigma.3.5.mm.3D_gldzm_ZonePercentage |
|-------------------------------------------------------------|-------------------------------------------------|---------------------------------------------------|------------------------------------------|
| 0.008358153                                                 | 416.2324059                                     | 545.00982                                         | 0.423130194                              |
| 0.023144718                                                 | 239.2972973                                     | 138.3378378                                       | 0.426512968                              |
| 0.01711001                                                  | 277.912                                         | 331.8213333                                       | 0.420403587                              |
| 0.024307372                                                 | 320.7483444                                     | 134.0728477                                       | 0.468944099                              |
| 0.014591906                                                 | 240.2254902                                     | 453.5294118                                       | 0.361445783                              |
| 0.023260961                                                 | 295.0083333                                     | 101.6666667                                       | 0.495867769                              |
| 0.010397203                                                 | 236.0206388                                     | 1927.972973                                       | 0.193092324                              |
| 0.005114431                                                 | 442.8133333                                     | 1667.906667                                       | 0.308998022                              |
| 0.008837948                                                 | 251.1727941                                     | 1042.972426                                       | 0.255279212                              |
| 0.018500579                                                 | 204.3764706                                     | 239.5019608                                       | 0.337748344                              |
| 0.020475527                                                 | 134.9353933                                     | 340.3595506                                       | 0.228791774                              |
| 0.010275378                                                 | 252.4662722                                     | 785.2745562                                       | 0.248018785                              |
| 0.017261823                                                 | 294.2709677                                     | 257.4258065                                       | 0.382244143                              |
| 0.033349607                                                 | 309.5976331                                     | 275.2485207                                       | 0.52484472                               |
| 0.013763466                                                 | 247.7517986                                     | 523.0395683                                       | 0.353015873                              |
| 0.022603207                                                 | 183.5707214                                     | 1355.272984                                       | 0.245400902                              |
| 0.024969797                                                 | 131.5223881                                     | 193.159204                                        | 0.227633069                              |
| 0.053744968                                                 | 238.919598                                      | 166.2562814                                       | 0.486552567                              |
| 0.032395669                                                 | 118.67713                                       | 213.2242152                                       | 0.203839122                              |
| 0.005626111                                                 | 382.751275                                      | 2426.114162                                       | 0.277578134                              |
| 0.015136856                                                 | 201.714032                                      | 524.4209591                                       | 0.27093359                               |
| 0.019730806                                                 | 220                                             | 173.4693878                                       | 0.39516129                               |
| 0.016494916                                                 | 260.6402439                                     | 160.0487805                                       | 0.29390681                               |
| 0.0260527                                                   | 155.8726708                                     | 616.6086957                                       | 0.179038087                              |
| 0.011115172                                                 | 322.125                                         | 372.5102041                                       | 0.319218241                              |
| 0.004210675                                                 | 556.9139241                                     | 735.9848101                                       | 0.309076682                              |
| 0.01339242                                                  | 281.2465565                                     | 675.862259                                        | 0.362275449                              |
| 0.020301312                                                 | 187.3024                                        | 593.8192                                          | 0.277407901                              |
| 0.152685266                                                 | 109.9                                           | 41                                                | 0.342465753                              |
| 0.016720433                                                 | 197.9312377                                     | 499.0982318                                       | 0.316149068                              |
| 0.012569549                                                 | 221.0326567                                     | 1080.286849                                       | 0.282614118                              |
| 0.013331165                                                 | 318.9484241                                     | 306.0315186                                       | 0.442893401                              |
| 0.016843623                                                 | 232.6049563                                     | 601.9037901                                       | 0.29379015                               |
| 0.009722784                                                 | 240.605225                                      | 661.5689405                                       | 0.285300207                              |
| 0.010516209                                                 | 284.7527397                                     | 1370.89863                                        | 0.284434054                              |
| 0.015709361                                                 | 382.2039474                                     | 599.7921053                                       | 0.391954616                              |
| 0.008979745                                                 | 526.2312139                                     | 471.0404624                                       | 0.457671958                              |
| 0.009185371                                                 | 271.3445378                                     | 1346.470588                                       | 0.245318674                              |
| 0.050311208                                                 | 186.6770186                                     | 142.242236                                        | 0.2875                                   |
| 0.002717221                                                 | 628.9936087                                     | 1898.818092                                       | 0.215306446                              |
| 0.011945049                                                 | 286.0759494                                     | 410.8776371                                       | 0.353731343                              |
| 0.012221243                                                 | 217.2676056                                     | 948.2187793                                       | 0.187764457                              |
| 0.008813871                                                 | 352.8284855                                     | 935.0541625                                       | 0.412324235                              |
| 0.021190718                                                 | 244.2743682                                     | 508.0794224                                       | 0.390140845                              |
| 0.022096694                                                 | 196.8258258                                     | 317.3843844                                       | 0.214010283                              |
| 0.012451163                                                 | 289.6256921                                     | 835.7131783                                       | 0.376093294                              |
| 0.006807656                                                 | 307.5806938                                     | 1257.847662                                       | 0.247804149                              |
| 0.021172797                                                 | 164.8206897                                     | 143.0137931                                       | 0.295315682                              |
| 0.023138607                                                 | 220.011976                                      | 149.9700599                                       | 0.427109974                              |
| 0.013192198                                                 | 351.7688172                                     | 178.172043                                        | 0.411504425                              |
| 0.021843679                                                 | 240.4393939                                     | 514.1856061                                       | 0.41025641                               |
| 0.007935731                                                 | 338.3285441                                     | 946.9827586                                       | 0.37486535                               |
| 0.023501746                                                 | 155.615257                                      | 1117.509121                                       | 0.151203611                              |
| 0.006679185                                                 | 363.2645161                                     | 445.4301075                                       | 0.28319123                               |
| 0.019919247                                                 | 299.1197411                                     | 285.9320388                                       | 0.480559876                              |
| 0.016345591                                                 | 227.3277108                                     | 384.2337349                                       | 0.352891156                              |
| 0.012455089                                                 | 262.7389801                                     | 1096.661193                                       | 0.288169365                              |
| 0.00804173                                                  | 310.3532847                                     | 633.1284672                                       | 0.331398162                              |
| 0.026512869                                                 | 224.658147                                      | 270.3801917                                       | 0.410222805                              |
| 0.005988576                                                 | 349.9880775                                     | 1863.044709                                       | 0.184797576                              |
| 0.009838835                                                 | 278.9836735                                     | 468.4938776                                       | 0.368698269                              |
| 0.007034625                                                 | 381.518595                                      | 867.803719                                        | 0.392697769                              |
| 0.004883799                                                 | 471.0928491                                     | 2285.7076                                         | 0.324386689                              |
| 0.019897534                                                 | 297.5765379                                     | 576.230329                                        | 0.333492366                              |
| 0.033714697                                                 | 182.3593074                                     | 215.5541126                                       | 0.341211226                              |
| 0.012247983                                                 | 346.3390848                                     | 1124.498875                                       | 0.389652148                              |
| 0.025661912                                                 | 225.0604027                                     | 128.6241611                                       | 0.366995074                              |
| 0.005769804                                                 | 430.4352009                                     | 1505.663271                                       | 0.347492625                              |
| 0.009736877                                                 | 232.5590651                                     | 1501.22868                                        | 0.210841769                              |
| 0.010009953                                                 | 251.556338                                      | 656.2084507                                       | 0.334274953                              |
| 0.018011209                                                 | 224.3608247                                     | 180.5051546                                       | 0.394308943                              |
| 0.0083405                                                   | 374.2515636                                     | 1338.758165                                       | 0.288897812                              |
| 0.018026976                                                 | 240.8076923                                     | 502.3115385                                       | 0.389513109                              |
| 0.021405947                                                 | 189.0515464                                     | 378.128866                                        | 0.408421053                              |
| 0.019996516                                                 | 261.1411509                                     | 755.3800217                                       | 0.225514202                              |
| 0.017905232                                                 | 161.0150943                                     | 257.1207547                                       | 0.288671024                              |
| 0.009540064                                                 | 290.1895803                                     | 629.9638205                                       | 0.312811227                              |
| 0.015095089                                                 | 444.1976048                                     | 134.8802395                                       | 0.517027864                              |
| 0.014122942                                                 | 260.6846652                                     | 419.2850972                                       | 0.352091255                              |
| 0.012258081                                                 | 242.8371041                                     | 430.1628959                                       | 0.245555556                              |
| 0.008063951                                                 | 409.5670628                                     | 532.0560272                                       | 0.418918919                              |
| 0.016662492                                                 | 196.2115385                                     | 302.1602564                                       | 0.377723971                              |
| 0.017180473                                                 | 209.8399453                                     | 711.2735978                                       | 0.320333041                              |
| 0.014491627                                                 | 198.8623656                                     | 451.2107527                                       | 0.245641838                              |
| 0.011245473                                                 | 250.9044776                                     | 596.5402985                                       | 0.246777164                              |
| 0.013553881                                                 | 301.5722222                                     | 157.6                                             | 0.338983051                              |
| 0.017035608                                                 | 299.2987805                                     | 448.1504065                                       | 0.376146789                              |
| 0.01280266                                                  | 212.1030445                                     | 828.3957845                                       | 0.222627737                              |
| 0.013706929                                                 | 262.2296015                                     | 490.370019                                        | 0.309817754                              |
| 0.010580233                                                 | 266.2924901                                     | 478.7747036                                       | 0.370153621                              |
| 0.012068415                                                 | 374.4212766                                     | 185.6723404                                       | 0.292288557                              |
| 0.017262324                                                 | 241.8157454                                     | 562.0854271                                       | 0.235781991                              |
| 0.009558229                                                 | 245.5752773                                     | 1156.793978                                       | 0.280382137                              |
| 0.011644688                                                 | 226.0892857                                     | 884.5735294                                       | 0.276262333                              |
| 0.014057767                                                 | 193.6595238                                     | 751.2595238                                       | 0.254006653                              |
| 0.007815416                                                 | 414.2259007                                     | 805.6738072                                       | 0.430788591                              |
| 0.015018458                                                 | 231.4102244                                     | 697.8204489                                       | 0.327079935                              |
| 0.017287394                                                 | 299.5984848                                     | 118.7424242                                       | 0.42172524                               |
| 0.02941999                                                  | 178.0333333                                     | 80.55555556                                       | 0.335820896                              |
| 0.00532424                                                  | 391.269921                                      | 2459.734386                                       | 0.315729828                              |

| log.sigma.3.5.mm.3D_gldzm_IntensityVariabilityNormalized | log.sigma.3.5.mm.3D_gldzm_LowIntensitySmallDistanceEmphasis | log.sigma.3.5.mm.3D_gldzm_IntensityVariability |
|----------------------------------------------------------|-------------------------------------------------------------|------------------------------------------------|
| 0.038677171                                              | 0.007256535                                                 | 23.63175123                                    |
| 0.046749452                                              | 0.022236279                                                 | 6.918918919                                    |
| 0.045319111                                              | 0.015660724                                                 | 16.99466667                                    |
| 0.046620762                                              | 0.022428461                                                 | 7.039735099                                    |
| 0.049803922                                              | 0.012683859                                                 | 25.4                                           |
| 0.045972222                                              | 0.021081411                                                 | 5.516666667                                    |
| 0.051456996                                              | 0.009814034                                                 | 104.7149877                                    |
| 0.04557056                                               | 0.003935369                                                 | 85.4448                                        |
| 0.054817596                                              | 0.0080625                                                   | 59.64154412                                    |
| 0.054117647                                              | 0.017324265                                                 | 13.8                                           |
| 0.067731347                                              | 0.019481593                                                 | 24.11235955                                    |
| 0.052982739                                              | 0.009187588                                                 | 44.7704142                                     |
| 0.044703434                                              | 0.014800125                                                 | 13.85806452                                    |
| 0.047512342                                              | 0.006776251                                                 | 16.0591716                                     |
| 0.048192381                                              | 0.011861867                                                 | 26.79496403                                    |
| 0.050974394                                              | 0.021863148                                                 | 72.07779349                                    |
| 0.068636915                                              | 0.023786909                                                 | 13.7960199                                     |
| 0.048811899                                              | 0.02067792                                                  | 9.713567839                                    |
| 0.070079833                                              | 0.031307291                                                 | 15.62780269                                    |
| 0.045340745                                              | 0.005394778                                                 | 115.5735583                                    |
| 0.054879184                                              | 0.014008945                                                 | 30.89698046                                    |
| 0.052998751                                              | 0.016215769                                                 | 10.3877551                                     |
| 0.052498513                                              | 0.016077321                                                 | 8.609756098                                    |
| 0.06628313                                               | 0.018890824                                                 | 42.6863354                                     |
| 0.044916181                                              | 0.010207158                                                 | 17.60714286                                    |
| 0.044031405                                              | 0.003906744                                                 | 34.78481013                                    |
| 0.045587354                                              | 0.012052021                                                 | 33.09641873                                    |
| 0.05619456                                               | 0.017258677                                                 | 35.1216                                        |
| 0.0656                                                   | 0.0438311                                                   | 3.28                                           |
| 0.056928142                                              | 0.016419598                                                 | 28.97642436                                    |
| 0.053658635                                              | 0.010844227                                                 | 60.79523389                                    |
| 0.046559552                                              | 0.010647148                                                 | 16.24928367                                    |
| 0.050110923                                              | 0.013996687                                                 | 34.37609329                                    |
| 0.05554631                                               | 0.009329072                                                 | 38.27140784                                    |
| 0.048509101                                              | 0.008333159                                                 | 70.82328767                                    |
| 0.046464681                                              | 0.00446182                                                  | 35.31315789                                    |
| 0.043732667                                              | 0.003934306                                                 | 30.26300578                                    |
| 0.048454676                                              | 0.008458058                                                 | 69.19327731                                    |
| 0.069480344                                              | 0.01150483                                                  | 11.1863354                                     |
| 0.054289952                                              | 0.002416908                                                 | 110.425762                                     |
| 0.051647706                                              | 0.008572685                                                 | 24.48101266                                    |
| 0.06271507                                               | 0.008908334                                                 | 66.7915493                                     |
| 0.046489519                                              | 0.006371288                                                 | 46.35005015                                    |
| 0.050912953                                              | 0.011369405                                                 | 28.20577617                                    |
| 0.056029002                                              | 0.020089248                                                 | 18.65765766                                    |
| 0.048919009                                              | 0.006874506                                                 | 44.17386489                                    |
| 0.055245024                                              | 0.005954258                                                 | 73.25490196                                    |
| 0.066539834                                              | 0.020768703                                                 | 9.648275862                                    |
| 0.050449998                                              | 0.018200775                                                 | 8.425149701                                    |
| 0.042952943                                              | 0.012696507                                                 | 7.989247312                                    |
| 0.050454832                                              | 0.012280009                                                 | 26.64015152                                    |
| 0.046461444                                              | 0.006939331                                                 | 48.50574713                                    |
| 0.063154377                                              | 0.017633978                                                 | 76.1641791                                     |
| 0.054475662                                              | 0.006429932                                                 | 25.3311828                                     |
| 0.042783381                                              | 0.017044734                                                 | 13.22006472                                    |
| 0.048221803                                              | 0.01401656                                                  | 20.01204819                                    |
| 0.054004448                                              | 0.006664607                                                 | 62.48314607                                    |
| 0.049927007                                              | 0.007303272                                                 | 34.2                                           |
| 0.057048658                                              | 0.010122204                                                 | 17.85623003                                    |
| 0.054081407                                              | 0.005047641                                                 | 108.8658718                                    |
| 0.050020825                                              | 0.009258676                                                 | 24.51020408                                    |
| 0.043401236                                              | 0.006183745                                                 | 42.01239669                                    |
| 0.043806903                                              | 0.003712948                                                 | 117.0082366                                    |
| 0.049105507                                              | 0.010455679                                                 | 34.32474964                                    |
| 0.051067259                                              | 0.032037699                                                 | 11.7965368                                     |
| 0.045023071                                              | 0.006977528                                                 | 60.01575394                                    |
| 0.052385028                                              | 0.020343917                                                 | 7.805369128                                    |
| 0.048618498                                              | 0.004000538                                                 | 85.90888512                                    |
| 0.058860149                                              | 0.009076451                                                 | 93.17561592                                    |
| 0.051081135                                              | 0.009200543                                                 | 36.26760563                                    |
| 0.052928048                                              | 0.016077887                                                 | 10.26804124                                    |
| 0.047816678                                              | 0.004585425                                                 | 68.80820014                                    |
| 0.048128698                                              | 0.015583731                                                 | 25.02692308                                    |
| 0.052117653                                              | 0.020940341                                                 | 20.22164948                                    |
| 0.053120516                                              | 0.0083036                                                   | 48.92399566                                    |
| 0.06494838                                               | 0.017040241                                                 | 17.21132075                                    |
| 0.052146578                                              | 0.008603077                                                 | 36.03328509                                    |
| 0.045716949                                              | 0.012029282                                                 | 7.634730539                                    |
| 0.048080646                                              | 0.012129866                                                 | 22.26133909                                    |
| 0.055250711                                              | 0.01190734                                                  | 24.42081448                                    |
| 0.039135711                                              | 0.007020076                                                 | 23.05093379                                    |
| 0.054487179                                              | 0.01586023                                                  | 17                                             |
| 0.052692842                                              | 0.015568764                                                 | 38.51846785                                    |
| 0.064076772                                              | 0.011630101                                                 | 29.79569892                                    |
| 0.051267543                                              | 0.009606714                                                 | 34.34925373                                    |
| 0.054135802                                              | 0.012288939                                                 | 9.744444444                                    |
| 0.049722387                                              | 0.007087521                                                 | 24.46341463                                    |
| 0.052454629                                              | 0.012086182                                                 | 44.79625293                                    |
| 0.049332263                                              | 0.012613125                                                 | 25.99810247                                    |
| 0.049305566                                              | 0.009873879                                                 | 24.9486166                                     |
| 0.046808511                                              | 0.010095453                                                 | 11                                             |
| 0.058632077                                              | 0.007632402                                                 | 35.00335008                                    |
| 0.056335251                                              | 0.008120928                                                 | 71.09508716                                    |
| 0.054028229                                              | 0.010408023                                                 | 51.43487395                                    |
| 0.063157596                                              | 0.010300216                                                 | 53.05238095                                    |
| 0.041289279                                              | 0.005428072                                                 | 42.40408958                                    |
| 0.049119719                                              | 0.012267317                                                 | 39.39401496                                    |
| 0.055211203                                              | 0.014053961                                                 | 7.287878788                                    |
| 0.065679012                                              | 0.026779824                                                 | 5.911111111                                    |
| 0.046702335                                              | 0.004276192                                                 | 130.1127064                                    |

| log.sigma.3.5.mm.3D_gldzm_HighIntensityLargeDistanceEmphasis | log.sigma.3.5.mm.3D_gldzm_SmallDistanceEmphasis | log.sigma.3.5.mm.3D_glcm_SumVariance | log.sigma.3.5.mm.3D_glcm_Homogeneity1 |
|--------------------------------------------------------------|-------------------------------------------------|--------------------------------------|---------------------------------------|
| 493.6873977                                                  | 0.957037643                                     | 979.3414266                          | 0.294940684                           |
| 257.9864865                                                  | 0.974662162                                     | 619.4872856                          | 0.287095971                           |
| 314.128                                                      | 0.954                                           | 694.454489                           | 0.290468122                           |
| 349.9337748                                                  | 0.955298013                                     | 651.4189062                          | 0.272169476                           |
| 265.9960784                                                  | 0.955882353                                     | 536.8460286                          | 0.313845355                           |
| 338.4333333                                                  | 0.9375                                          | 807.0786518                          | 0.292552961                           |
| 256.2009828                                                  | 0.97972973                                      | 540.6978257                          | 0.476583311                           |
| 510.1141333                                                  | 0.956                                           | 1058.017991                          | 0.351769048                           |
| 261.4273897                                                  | 0.984145221                                     | 468.9981975                          | 0.407878407                           |
| 220.1764706                                                  | 0.976470588                                     | 423.9729544                          | 0.347456237                           |
| 142.5365169                                                  | 0.983146067                                     | 276.4307595                          | 0.427463581                           |
| 274.3289941                                                  | 0.972485207                                     | 525.3188938                          | 0.422251348                           |
| 350.8935484                                                  | 0.92983871                                      | 936.4161683                          | 0.306325328                           |
| 332.7899408                                                  | 0.922337278                                     | 663.5254812                          | 0.273398062                           |
| 258.9640288                                                  | 0.977068345                                     | 442.497972                           | 0.338668222                           |
| 191.9618105                                                  | 0.984087694                                     | 397.8328926                          | 0.433265296                           |
| 136                                                          | 0.985074627                                     | 228.0548964                          | 0.396326174                           |
| 254.2964824                                                  | 0.932160804                                     | 465.3732531                          | 0.28843329                            |
| 125.1345291                                                  | 0.983183857                                     | 190.7814042                          | 0.429583862                           |
| 417.260102                                                   | 0.981463319                                     | 1046.458462                          | 0.376782035                           |
| 215.8614565                                                  | 0.973357016                                     | 441.7918558                          | 0.358157443                           |
| 235.9489796                                                  | 0.954081633                                     | 447.1680286                          | 0.313505005                           |
| 265.2134146                                                  | 0.990853659                                     | 512.9039851                          | 0.346881289                           |
| 161.1086957                                                  | 0.983695652                                     | 263.0594914                          | 0.486860877                           |
| 339.244898                                                   | 0.980867347                                     | 781.4486271                          | 0.379674612                           |
| 610.1164557                                                  | 0.973417722                                     | 1350.946676                          | 0.355334969                           |
| 301.4862259                                                  | 0.973140496                                     | 555.8276342                          | 0.318687689                           |
| 193.6384                                                     | 0.9808                                          | 336.6884976                          | 0.382707593                           |
| 113.86                                                       | 0.925                                           | 171.9157717                          | 0.387587974                           |
| 201.6561886                                                  | 0.992632613                                     | 387.2776696                          | 0.361472305                           |
| 232.2568402                                                  | 0.982127096                                     | 436.5156478                          | 0.373180987                           |
| 346.782235                                                   | 0.950573066                                     | 805.4977333                          | 0.282771397                           |
| 265.2507289                                                  | 0.950801749                                     | 487.3286035                          | 0.378186772                           |
| 254.6777939                                                  | 0.984760522                                     | 582.3794733                          | 0.407134861                           |
| 299.4979452                                                  | 0.976369863                                     | 593.1919534                          | 0.375755719                           |
| 444.375                                                      | 0.910197368                                     | 1044.258469                          | 0.308771832                           |
| 667.1401734                                                  | 0.850433526                                     | 1446.501909                          | 0.265298767                           |
| 289.5777311                                                  | 0.977941176                                     | 625.6794167                          | 0.454355714                           |
| 193.6086957                                                  | 0.953416149                                     | 369.9374764                          | 0.357448321                           |
| 686.6588004                                                  | 0.974188791                                     | 1736.459756                          | 0.446114398                           |
| 317.8417722                                                  | 0.946202532                                     | 594.5324384                          | 0.326808208                           |
| 248.0112676                                                  | 0.956338028                                     | 469.403772                           | 0.473474114                           |
| 363.9227683                                                  | 0.975927783                                     | 925.2510487                          | 0.292801175                           |
| 266.1191336                                                  | 0.967509025                                     | 494.7570512                          | 0.316133735                           |
| 201.7537538                                                  | 0.981981982                                     | 340.1277165                          | 0.45632968                            |
| 309.9114064                                                  | 0.970930233                                     | 627.284917                           | 0.327997043                           |
| 327.8431373                                                  | 0.98020362                                      | 687.7711914                          | 0.399021295                           |
| 166.1448276                                                  | 0.994827586                                     | 328.8052379                          | 0.380725775                           |
| 227.4131737                                                  | 0.959580838                                     | 441.6416726                          | 0.308772742                           |
| 363.4301075                                                  | 0.983870968                                     | 987.0815892                          | 0.2893633                             |
| 242.0530303                                                  | 0.990056818                                     | 406.6785181                          | 0.339833831                           |
| 376.348659                                                   | 0.963362069                                     | 848.5355635                          | 0.31462498                            |
| 170.115257                                                   | 0.971393035                                     | 288.178479                           | 0.531355544                           |
| 385.4322581                                                  | 0.983870968                                     | 1008.56225                           | 0.375054736                           |
| 310.1488673                                                  | 0.970873786                                     | 724.5465063                          | 0.276761245                           |
| 239.573494                                                   | 0.971084337                                     | 473.4759796                          | 0.323491812                           |
| 275.6983578                                                  | 0.979904927                                     | 556.8772626                          | 0.391534885                           |
| 339.5474453                                                  | 0.970437956                                     | 786.1841783                          | 0.321961499                           |
| 246.1277955                                                  | 0.944888179                                     | 459.3771836                          | 0.31675961                            |
| 387.6482861                                                  | 0.970938897                                     | 828.4184579                          | 0.480551556                           |
| 293.7877551                                                  | 0.983163265                                     | 679.0310916                          | 0.334725196                           |
| 441.5340909                                                  | 0.95893595                                      | 1042.199272                          | 0.310439815                           |
| 562.7607638                                                  | 0.941314115                                     | 1257.898565                          | 0.346265566                           |
| 356.0701001                                                  | 0.927038627                                     | 728.3155469                          | 0.327381643                           |
| 191.8008658                                                  | 0.974025974                                     | 399.262701                           | 0.347207591                           |
| 408.951988                                                   | 0.935858965                                     | 902.7962891                          | 0.301750247                           |
| 240.3422819                                                  | 0.944630872                                     | 534.7037352                          | 0.301868893                           |
| 512.45897                                                    | 0.939649752                                     | 1068.129906                          | 0.332126028                           |
| 252.1642451                                                  | 0.980101074                                     | 520.5046935                          | 0.41596106                            |
| 276.6211268                                                  | 0.970422535                                     | 709.7432403                          | 0.340736812                           |
| 235.3402062                                                  | 0.972938144                                     | 453.7976822                          | 0.317184954                           |
| 396.8756081                                                  | 0.972897846                                     | 891.6712212                          | 0.364666035                           |
| 245.5846154                                                  | 0.987019231                                     | 475.7477972                          | 0.30577093                            |
| 193.9768041                                                  | 0.990335052                                     | 386.6684869                          | 0.339067862                           |
| 307.8414767                                                  | 0.925081433                                     | 502.1606569                          | 0.426903936                           |
| 166.2113208                                                  | 0.988679245                                     | 370.6301686                          | 0.368097468                           |
| 323.6758321                                                  | 0.965267728                                     | 831.7570596                          | 0.338332204                           |
| 510.8263473                                                  | 0.919161677                                     | 1176.164628                          | 0.253509962                           |
| 289.9460043                                                  | 0.962742981                                     | 662.4561386                          | 0.329681826                           |
| 250.438914                                                   | 0.989819005                                     | 480.422646                           | 0.406454396                           |
| 473.483871                                                   | 0.96179966                                      | 967.7729946                          | 0.297878056                           |
| 202.6538462                                                  | 0.987980769                                     | 503.8484053                          | 0.330264286                           |
| 215.9425445                                                  | 0.989740082                                     | 403.1363379                          | 0.373593492                           |
| 201.4688172                                                  | 0.988709677                                     | 365.7327029                          | 0.387428932                           |
| 284.5940299                                                  | 0.956343284                                     | 527.307101                           | 0.400177681                           |
| 344.5055556                                                  | 0.95                                            | 1048.043619                          | 0.339064095                           |
| 321.7256098                                                  | 0.964939024                                     | 683.2253742                          | 0.328559041                           |
| 217.0491803                                                  | 0.988583138                                     | 363.5509826                          | 0.461450991                           |
| 279.8766603                                                  | 0.972960152                                     | 653.6888245                          | 0.366539639                           |
| 283.7470356                                                  | 0.979249012                                     | 642.2860349                          | 0.321680082                           |
| 477.8510638                                                  | 0.910638298                                     | 1023.71662                           | 0.349367583                           |
| 251.9011725                                                  | 0.977386935                                     | 447.6364977                          | 0.427256283                           |
| 268.4865293                                                  | 0.967313788                                     | 588.8305455                          | 0.374427519                           |
| 245.7972689                                                  | 0.972426471                                     | 501.3895368                          | 0.370735256                           |
| 217.6095238                                                  | 0.958035714                                     | 421.9251266                          | 0.388417764                           |
| 531.932814                                                   | 0.907849183                                     | 1108.817158                          | 0.281585081                           |
| 262.584788                                                   | 0.947630923                                     | 564.986145                           | 0.331043275                           |
| 319.5075758                                                  | 0.960227273                                     | 783.0155207                          | 0.311928305                           |
| 192.4333333                                                  | 0.958333333                                     | 418.2879774                          | 0.334491488                           |
| 455.3768844                                                  | 0.95315865                                      | 1172.605897                          | 0.346863449                           |

| log.sigma.3.5.mm.3D_glcml_Homogeneity2 | log.sigma.3.5.mm.3D_glcml_ClusterShade | log.sigma.3.5.mm.3D_glcml_MaximumProbability | log.sigma.3.5.mm.3D_glcml_Idmn | log.sigma.3.5.mm.3D_glcml_SumVariance2 |
|----------------------------------------|----------------------------------------|----------------------------------------------|--------------------------------|----------------------------------------|
| 0.20546956                             | 639.6596941                            | 0.012124528                                  | 0.976373079                    | 113.4481962                            |
| 0.194475555                            | -82.58823763                           | 0.016606901                                  | 0.959993633                    | 108.8884614                            |
| 0.200000713                            | -122.824145                            | 0.01234678                                   | 0.961021688                    | 105.5145316                            |
| 0.178499422                            | -132.4438675                           | 0.013645874                                  | 0.957364895                    | 127.091068                             |
| 0.221340946                            | 186.5877011                            | 0.009870399                                  | 0.972872753                    | 100.5711337                            |
| 0.198749267                            | -149.3283925                           | 0.017336149                                  | 0.96296012                     | 113.9695388                            |
| 0.41312501                             | 222.0522941                            | 0.085480427                                  | 0.989062606                    | 51.07546514                            |
| 0.269533557                            | 436.5896229                            | 0.025050023                                  | 0.981573604                    | 81.18970335                            |
| 0.33246182                             | 383.71852                              | 0.0447537                                    | 0.980080797                    | 64.09112583                            |
| 0.256378351                            | 95.34954486                            | 0.015495369                                  | 0.972649962                    | 60.69696239                            |
| 0.351418955                            | 73.50647192                            | 0.036990076                                  | 0.978837107                    | 36.07942682                            |
| 0.34973292                             | 187.4650174                            | 0.041721509                                  | 0.985317511                    | 52.67638355                            |
| 0.217627792                            | -576.088601                            | 0.017007122                                  | 0.964776609                    | 114.0501687                            |
| 0.180214805                            | -37.36301203                           | 0.01029593                                   | 0.965176748                    | 117.5012915                            |
| 0.254144809                            | 459.2134734                            | 0.013992556                                  | 0.978418497                    | 79.93716668                            |
| 0.367121285                            | 193.7323867                            | 0.070862552                                  | 0.975036192                    | 76.67226362                            |
| 0.31325741                             | 43.41936951                            | 0.021080702                                  | 0.969037653                    | 40.58770068                            |
| 0.195380097                            | 176.6195767                            | 0.0135138                                    | 0.965788954                    | 113.6443497                            |
| 0.35394839                             | 48.57183846                            | 0.029557011                                  | 0.974035623                    | 32.14956127                            |
| 0.295481818                            | 255.1602663                            | 0.020054165                                  | 0.987012555                    | 65.03907756                            |
| 0.271735518                            | 35.42241123                            | 0.013543389                                  | 0.973142644                    | 79.06637686                            |
| 0.221340804                            | -14.21093839                           | 0.014865256                                  | 0.962199563                    | 84.04463718                            |
| 0.258550605                            | 56.53419344                            | 0.019217953                                  | 0.971449905                    | 75.94798257                            |
| 0.423056687                            | 98.37492538                            | 0.085284631                                  | 0.983701101                    | 35.83051811                            |
| 0.303424579                            | 60.96366563                            | 0.052256219                                  | 0.975426603                    | 93.85954303                            |
| 0.273047386                            | 676.0128783                            | 0.016603113                                  | 0.984460141                    | 97.08586867                            |
| 0.229496099                            | 378.1816812                            | 0.011325831                                  | 0.977668912                    | 89.23320335                            |
| 0.299392195                            | 148.0068036                            | 0.019313519                                  | 0.977702126                    | 55.78971071                            |
| 0.301055356                            | 135.6668344                            | 0.043631552                                  | 0.965394538                    | 37.29388662                            |
| 0.273676344                            | 99.89192951                            | 0.013709416                                  | 0.977563888                    | 59.61598175                            |
| 0.291661089                            | 323.7817802                            | 0.014252154                                  | 0.977267609                    | 74.31020584                            |
| 0.190584151                            | -200.9968904                           | 0.011283002                                  | 0.962837183                    | 104.0068348                            |
| 0.297282869                            | 407.5103593                            | 0.023168334                                  | 0.98195443                     | 79.10821568                            |
| 0.332518514                            | 175.0104218                            | 0.039564572                                  | 0.98045068                     | 74.68298497                            |
| 0.293971953                            | 286.8123548                            | 0.021254505                                  | 0.981971514                    | 68.50743462                            |
| 0.221752042                            | -284.0268866                           | 0.012367462                                  | 0.969777007                    | 97.07920758                            |
| 0.174811098                            | -469.3682711                           | 0.008431954                                  | 0.964161827                    | 133.699207                             |
| 0.39083655                             | 170.8446288                            | 0.104354087                                  | 0.980659489                    | 78.92136435                            |
| 0.265433465                            | -75.32726595                           | 0.0188354                                    | 0.970511623                    | 51.49812837                            |
| 0.3764383                              | 203.9493146                            | 0.051112373                                  | 0.992081244                    | 54.98688322                            |
| 0.236094628                            | 186.4241108                            | 0.014967636                                  | 0.979055743                    | 84.25590046                            |
| 0.407099915                            | 113.1164856                            | 0.068688491                                  | 0.990191036                    | 33.48668221                            |
| 0.20410318                             | -11.65762507                           | 0.009151134                                  | 0.966581382                    | 117.2487471                            |
| 0.22413138                             | 365.0958386                            | 0.010539523                                  | 0.970857557                    | 94.30385194                            |
| 0.388852513                            | 158.6366577                            | 0.075067477                                  | 0.985122499                    | 46.20303113                            |
| 0.241169494                            | 231.130548                             | 0.012864537                                  | 0.972507695                    | 94.37952941                            |
| 0.321203388                            | 134.3404754                            | 0.02132891                                   | 0.98614934                     | 56.21722866                            |
| 0.293470699                            | -51.43343733                           | 0.02556729                                   | 0.973354048                    | 46.45969473                            |
| 0.213952709                            | 384.7665661                            | 0.013830026                                  | 0.970310983                    | 91.92054634                            |
| 0.197522411                            | -359.0657023                           | 0.0158321                                    | 0.967080137                    | 104.1222169                            |
| 0.253496073                            | 511.1206691                            | 0.019532216                                  | 0.972180361                    | 82.20556213                            |
| 0.222938812                            | 328.2681299                            | 0.009454696                                  | 0.980298862                    | 92.18389349                            |
| 0.477973189                            | 103.5966615                            | 0.098169812                                  | 0.98867224                     | 31.33257499                            |
| 0.291610617                            | -0.049598093                           | 0.019223796                                  | 0.984284501                    | 48.63029798                            |
| 0.184495002                            | -256.4419805                           | 0.01294358                                   | 0.964207199                    | 137.8864246                            |
| 0.232370075                            | 406.0302911                            | 0.01177842                                   | 0.973698514                    | 94.96445892                            |
| 0.313182128                            | 256.1194202                            | 0.026858624                                  | 0.978115897                    | 67.67803753                            |
| 0.232923969                            | 22.64184163                            | 0.010656673                                  | 0.974902122                    | 81.69888983                            |
| 0.224384416                            | 45.96861549                            | 0.014575018                                  | 0.96522668                     | 72.56827689                            |
| 0.417503932                            | 90.99132504                            | 0.092869993                                  | 0.988652756                    | 44.48870002                            |
| 0.246373138                            | 103.6598882                            | 0.016431923                                  | 0.975536592                    | 74.94787468                            |
| 0.220162812                            | 172.556296                             | 0.014373011                                  | 0.978918559                    | 98.11371467                            |
| 0.262642609                            | 273.4169246                            | 0.020586021                                  | 0.984531304                    | 96.68830658                            |
| 0.236285985                            | 31.62906773                            | 0.010473635                                  | 0.98110452                     | 93.95190177                            |
| 0.258537451                            | 10.48203584                            | 0.018012374                                  | 0.970038979                    | 56.56186045                            |
| 0.209681043                            | 50.44076864                            | 0.008854462                                  | 0.977065277                    | 89.47966796                            |
| 0.207939736                            | -237.4814924                           | 0.01375604                                   | 0.953764684                    | 88.25654644                            |
| 0.243258359                            | 365.0712085                            | 0.013661349                                  | 0.98475899                     | 80.16495647                            |
| 0.338806246                            | 153.479427                             | 0.025091527                                  | 0.985842716                    | 52.89280549                            |
| 0.251286731                            | -18.40910694                           | 0.012708648                                  | 0.977829994                    | 74.01904343                            |
| 0.225740129                            | 69.46805214                            | 0.01580989                                   | 0.961665317                    | 82.21408543                            |
| 0.286556373                            | 117.1715788                            | 0.034929967                                  | 0.979719347                    | 78.54279089                            |
| 0.215625441                            | 351.9109276                            | 0.013012005                                  | 0.96778035                     | 100.5464396                            |
| 0.249028587                            | 187.8028474                            | 0.016462821                                  | 0.972084947                    | 67.50462368                            |
| 0.353754841                            | 352.8257254                            | 0.058363774                                  | 0.986971417                    | 63.70016901                            |
| 0.278521718                            | -17.85226979                           | 0.016879791                                  | 0.971788926                    | 46.40390419                            |
| 0.247101249                            | -4.200901443                           | 0.013799195                                  | 0.982008004                    | 69.37606562                            |
| 0.160928301                            | -780.2427704                           | 0.016124014                                  | 0.957437773                    | 138.7058665                            |
| 0.23776632                             | 28.93870505                            | 0.013227891                                  | 0.976040748                    | 83.46096758                            |
| 0.327521449                            | 128.6475059                            | 0.02628597                                   | 0.983284517                    | 47.60603805                            |
| 0.208380918                            | 665.3361894                            | 0.012466686                                  | 0.977191536                    | 110.5074805                            |
| 0.238880602                            | -144.0085186                           | 0.015685167                                  | 0.967673955                    | 77.11196577                            |
| 0.293524733                            | 199.3750154                            | 0.043209065                                  | 0.970577955                    | 74.52173282                            |
| 0.303436156                            | 94.36815205                            | 0.02051156                                   | 0.980500275                    | 44.48786917                            |
| 0.323305781                            | 246.4414877                            | 0.039119283                                  | 0.979798263                    | 67.50453758                            |
| 0.251931791                            | -631.8535312                           | 0.037846872                                  | 0.971114191                    | 74.35641751                            |
| 0.239795228                            | 129.5451625                            | 0.014102513                                  | 0.970949796                    | 81.33208422                            |
| 0.396873442                            | 288.769039                             | 0.074220485                                  | 0.98180028                     | 78.72255769                            |
| 0.282716098                            | 0.522775276                            | 0.021633051                                  | 0.980869513                    | 61.69624601                            |
| 0.22971745                             | 107.8721118                            | 0.01241502                                   | 0.975002694                    | 87.38040591                            |
| 0.26351359                             | -101.3841031                           | 0.017221225                                  | 0.976981088                    | 85.3321077                             |
| 0.354826575                            | 117.6153484                            | 0.039655441                                  | 0.982693042                    | 51.03295653                            |
| 0.288798196                            | 121.9807516                            | 0.013266226                                  | 0.986382015                    | 55.88984993                            |
| 0.28662464                             | 177.5487159                            | 0.015979178                                  | 0.979355247                    | 70.18955323                            |
| 0.303038371                            | 52.36977344                            | 0.017387268                                  | 0.978970564                    | 45.3132134                             |
| 0.190692628                            | 269.0481017                            | 0.007377818                                  | 0.978476406                    | 129.3074513                            |
| 0.240909874                            | 84.80212328                            | 0.010026229                                  | 0.971568526                    | 86.31922208                            |
| 0.217343055                            | -355.9363964                           | 0.017994896                                  | 0.965001677                    | 77.6269017                             |
| 0.244851062                            | -250.6356893                           | 0.024617709                                  | 0.956611627                    | 59.54837676                            |
| 0.262329362                            | 65.50162466                            | 0.017310011                                  | 0.982308265                    | 78.40628848                            |

| log.sigma.3.5.mm.3D_glc_m_Contrast | log.sigma.3.5.mm.3D_glc_m_DifferenceEntropy | log.sigma.3.5.mm.3D_glc_m_InverseVariance | log.sigma.3.5.mm.3D_glc_m_Entropy | log.sigma.3.5.mm.3D_glc_m_Dissimilarity |
|------------------------------------|---------------------------------------------|-------------------------------------------|-----------------------------------|-----------------------------------------|
| 38.79078322                        | 3.689393596                                 | 0.214854517                               | 8.612483868                       | 4.791241929                             |
| 34.89476665                        | 3.541587386                                 | 0.195887725                               | 7.791381134                       | 4.725066367                             |
| 36.49476224                        | 3.590549213                                 | 0.204236337                               | 8.39121521                        | 4.77793122                              |
| 40.34395073                        | 3.657852712                                 | 0.178742378                               | 7.948516986                       | 5.084814785                             |
| 26.49859237                        | 3.427153027                                 | 0.229761789                               | 8.324502837                       | 4.048908978                             |
| 32.44858512                        | 3.474979741                                 | 0.21027828                                | 7.623285917                       | 4.495726559                             |
| 15.89834809                        | 3.023135926                                 | 0.308986566                               | 7.304459857                       | 2.632139188                             |
| 28.46500712                        | 3.485606598                                 | 0.256329547                               | 8.363972218                       | 3.940801385                             |
| 19.41806758                        | 3.208868735                                 | 0.288911386                               | 7.753054913                       | 3.157947473                             |
| 18.68323993                        | 3.179941267                                 | 0.263354688                               | 7.743530238                       | 3.370801584                             |
| 11.030376                          | 2.845441672                                 | 0.334618283                               | 7.12366325                        | 2.489088043                             |
| 17.02386369                        | 3.130641953                                 | 0.312643393                               | 7.59921919                        | 2.926827703                             |
| 35.345278                          | 3.584361624                                 | 0.213831753                               | 8.241244528                       | 4.593473128                             |
| 39.33011536                        | 3.626624036                                 | 0.193906592                               | 8.365811701                       | 4.995591479                             |
| 30.55518561                        | 3.503965069                                 | 0.254983282                               | 8.15197241                        | 4.068808994                             |
| 23.42023794                        | 3.203169096                                 | 0.296711594                               | 7.751550501                       | 3.282281662                             |
| 12.41447836                        | 2.931798401                                 | 0.318981994                               | 7.262831035                       | 2.702591996                             |
| 34.02807648                        | 3.554058008                                 | 0.20710758                                | 7.969810622                       | 4.620985287                             |
| 10.30080091                        | 2.782255925                                 | 0.348864469                               | 6.966621018                       | 2.404810061                             |
| 20.84718481                        | 3.27018196                                  | 0.285966991                               | 8.051728185                       | 3.349805993                             |
| 19.85678477                        | 3.231309276                                 | 0.271504342                               | 8.039219215                       | 3.407704464                             |
| 26.3209305                         | 3.390124159                                 | 0.227740587                               | 7.883181092                       | 4.062686826                             |
| 22.81664079                        | 3.311074146                                 | 0.24377628                                | 7.784428956                       | 3.67032636                              |
| 10.17401504                        | 2.793464407                                 | 0.343456014                               | 6.937698599                       | 2.19778441                              |
| 29.53872889                        | 3.425641401                                 | 0.261897315                               | 8.041729442                       | 3.856151285                             |
| 26.43885112                        | 3.40434463                                  | 0.272753265                               | 8.219885971                       | 3.771905455                             |
| 31.02952463                        | 3.495723355                                 | 0.233575467                               | 8.314433905                       | 4.23311777                              |
| 16.35072521                        | 3.121956523                                 | 0.295930705                               | 7.734147541                       | 3.046626544                             |
| 12.56461339                        | 2.847557138                                 | 0.305577804                               | 6.27458948                        | 2.749009808                             |
| 17.62280103                        | 3.148255664                                 | 0.27805758                                | 7.813036759                       | 3.236307361                             |
| 20.76613149                        | 3.247303981                                 | 0.285372507                               | 8.060657388                       | 3.38177653                              |
| 37.0175198                         | 3.614378076                                 | 0.198006219                               | 8.341344244                       | 4.843926099                             |
| 21.05295262                        | 3.278972272                                 | 0.278628178                               | 8.055889075                       | 3.383079628                             |
| 20.37564065                        | 3.21642913                                  | 0.295040106                               | 7.810550435                       | 3.200142667                             |
| 21.10741964                        | 3.286963019                                 | 0.281348973                               | 8.040891782                       | 3.374702177                             |
| 36.17326903                        | 3.61112916                                  | 0.221150344                               | 8.563441402                       | 4.617398728                             |
| 51.97169159                        | 3.724406503                                 | 0.180056272                               | 8.777797533                       | 5.607430249                             |
| 22.95453684                        | 3.221274565                                 | 0.279963383                               | 7.653053729                       | 3.1985577                               |
| 15.55714266                        | 3.015088096                                 | 0.266182768                               | 7.430519139                       | 3.13026096                              |
| 14.53564192                        | 3.018769111                                 | 0.326835679                               | 7.563505047                       | 2.640053271                             |
| 24.36820899                        | 3.368252279                                 | 0.247030408                               | 8.16466456                        | 3.837797314                             |
| 10.53050467                        | 2.828066121                                 | 0.343316107                               | 6.955753142                       | 2.26830789                              |
| 40.2309439                         | 3.536839728                                 | 0.202038426                               | 8.656697627                       | 4.933494766                             |
| 26.81467217                        | 3.434462964                                 | 0.231386901                               | 8.298737399                       | 4.047927575                             |
| 12.56110481                        | 2.902506448                                 | 0.343939902                               | 7.094124174                       | 2.466681146                             |
| 28.83343759                        | 3.486755191                                 | 0.23709511                                | 8.426422062                       | 4.123585118                             |
| 18.01418347                        | 3.172126552                                 | 0.304774412                               | 7.826811462                       | 3.066942559                             |
| 13.98062818                        | 2.99048687                                  | 0.28336448                                | 7.151465567                       | 2.920115312                             |
| 25.56581659                        | 3.336822142                                 | 0.22855279                                | 7.758705241                       | 4.00017457                              |
| 34.77546315                        | 3.568359944                                 | 0.202243534                               | 7.997357684                       | 4.685308596                             |
| 25.67889786                        | 3.408593592                                 | 0.256209431                               | 7.999533482                       | 3.847777394                             |
| 28.84501877                        | 3.496896263                                 | 0.230696704                               | 8.48985352                        | 4.140731174                             |
| 8.790134124                        | 2.659525457                                 | 0.361198305                               | 6.565804196                       | 1.941617687                             |
| 18.18776295                        | 3.122449112                                 | 0.298167008                               | 7.602977779                       | 3.175827566                             |
| 40.64031431                        | 3.682552149                                 | 0.189796182                               | 8.424897095                       | 5.047352964                             |
| 25.78758725                        | 3.394723895                                 | 0.235357749                               | 8.183219474                       | 3.94641301                              |
| 20.07122442                        | 3.22480978                                  | 0.289123968                               | 7.936806156                       | 3.254402016                             |
| 27.67496148                        | 3.458823783                                 | 0.232230617                               | 8.256304795                       | 4.100790118                             |
| 26.05524129                        | 3.413213449                                 | 0.227815865                               | 8.033544456                       | 4.018049881                             |
| 13.92484152                        | 2.967532578                                 | 0.31936444                                | 7.220079541                       | 2.496653873                             |
| 25.55898778                        | 3.410780973                                 | 0.24878467                                | 8.149837943                       | 3.860775968                             |
| 30.86330057                        | 3.542813563                                 | 0.223847102                               | 8.567596652                       | 4.314137017                             |
| 28.93986268                        | 3.481758036                                 | 0.256034839                               | 8.568502172                       | 3.970471811                             |
| 24.69842751                        | 3.382603495                                 | 0.245789587                               | 8.406106292                       | 3.835243542                             |
| 20.57452305                        | 3.238269804                                 | 0.261464664                               | 7.728121699                       | 3.513376318                             |
| 31.90123754                        | 3.566934753                                 | 0.214421285                               | 8.601952567                       | 4.420700872                             |
| 30.34229524                        | 3.464506463                                 | 0.20006635                                | 7.860220553                       | 4.372564724                             |
| 25.68661995                        | 3.424399168                                 | 0.247753062                               | 8.353752111                       | 3.879925853                             |
| 13.49893724                        | 2.999508322                                 | 0.322595038                               | 7.613349309                       | 2.700344461                             |
| 21.41417317                        | 3.297853712                                 | 0.258121549                               | 8.148704752                       | 3.592943976                             |
| 26.78604455                        | 3.364274614                                 | 0.22457154                                | 7.781119925                       | 4.075618441                             |
| 28.17782489                        | 3.456482608                                 | 0.260897007                               | 8.250190504                       | 3.906132587                             |
| 31.93545106                        | 3.54189155                                  | 0.220591573                               | 8.360483451                       | 4.41561262                              |
| 22.22120685                        | 3.317269752                                 | 0.24970294                                | 7.862274576                       | 3.65565316                              |
| 16.9844271                         | 3.119165643                                 | 0.305461422                               | 7.640298103                       | 2.890477448                             |
| 14.83025396                        | 3.025770392                                 | 0.276038541                               | 7.476938855                       | 3.033772564                             |
| 20.7548993                         | 3.272809666                                 | 0.25343886                                | 8.056581454                       | 3.560977355                             |
| 48.90565977                        | 3.747097973                                 | 0.170459023                               | 7.990880346                       | 5.61725136                              |
| 23.3520965                         | 3.338470291                                 | 0.243147682                               | 8.216289902                       | 3.754537037                             |
| 15.1413975                         | 3.061527161                                 | 0.314087812                               | 7.50127568                        | 2.833161822                             |
| 37.33037663                        | 3.662497895                                 | 0.218188023                               | 8.559909819                       | 4.702140911                             |
| 22.22028633                        | 3.296910162                                 | 0.247370446                               | 7.989505179                       | 3.709219216                             |
| 25.61934727                        | 3.381087258                                 | 0.251208866                               | 8.004904882                       | 3.715833503                             |
| 14.12998835                        | 3.013721879                                 | 0.308445685                               | 7.50408537                        | 2.861421112                             |
| 18.3841915                         | 3.175918455                                 | 0.299770547                               | 7.834898867                       | 3.114102742                             |
| 24.88196681                        | 3.36417377                                  | 0.255482097                               | 7.392763848                       | 3.807294291                             |
| 26.87039192                        | 3.412232793                                 | 0.243381971                               | 8.226786651                       | 3.976881497                             |
| 15.58193336                        | 3.029064303                                 | 0.325861598                               | 7.397786913                       | 2.671896395                             |
| 21.00296878                        | 3.282982425                                 | 0.274969722                               | 7.925534862                       | 3.427865663                             |
| 24.27190054                        | 3.362386661                                 | 0.241858795                               | 8.228455527                       | 3.867368374                             |
| 24.00500784                        | 3.331078801                                 | 0.261253016                               | 7.937009366                       | 3.69162316                              |
| 14.67250359                        | 3.011506044                                 | 0.332459408                               | 7.445321251                       | 2.725430738                             |
| 16.51753037                        | 3.140491479                                 | 0.286452909                               | 7.846596092                       | 3.101920956                             |
| 18.62769769                        | 3.205419548                                 | 0.280753556                               | 8.024093384                       | 3.273115855                             |
| 12.99650569                        | 2.951070709                                 | 0.306428835                               | 7.514663362                       | 2.782984427                             |
| 40.49149669                        | 3.709248822                                 | 0.198825605                               | 8.875291211                       | 4.997336286                             |
| 24.48088067                        | 3.370925951                                 | 0.24511863                                | 8.31495256                        | 3.822313236                             |
| 26.36983854                        | 3.384850864                                 | 0.224020159                               | 7.55052731                        | 4.030741974                             |
| 21.67824754                        | 3.214246691                                 | 0.254988171                               | 7.170105367                       | 3.665843128                             |
| 25.77319994                        | 3.412486349                                 | 0.258500899                               | 8.377182238                       | 3.820629576                             |

| log.sigma.3.5.mm.3D_glcm_DifferenceVariance | log.sigma.3.5.mm.3D_glcm_Idn | log.sigma.3.5.mm.3D_glcm_Idm | log.sigma.3.5.mm.3D_glcm_Correlation | log.sigma.3.5.mm.3D_glcm_Autocorrelation |
|---------------------------------------------|------------------------------|------------------------------|--------------------------------------|------------------------------------------|
| 15.12307483                                 | 0.897430255                  | 0.20546956                   | 0.494082859                          | 321.2113425                              |
| 11.41958692                                 | 0.86516918                   | 0.194475555                  | 0.520146395                          | 211.9990542                              |
| 12.29818835                                 | 0.868286518                  | 0.200000713                  | 0.487198175                          | 235.7506225                              |
| 13.51381386                                 | 0.860817714                  | 0.178499422                  | 0.522642476                          | 220.7417109                              |
| 9.640215343                                 | 0.888276727                  | 0.221340946                  | 0.582753248                          | 189.7169948                              |
| 11.41793547                                 | 0.870938074                  | 0.198749267                  | 0.560436535                          | 268.9058951                              |
| 8.630694816                                 | 0.938378386                  | 0.41312501                   | 0.53022537                           | 189.0991774                              |
| 12.3399513                                  | 0.912191002                  | 0.269533557                  | 0.485421306                          | 344.4788147                              |
| 8.871962072                                 | 0.911841965                  | 0.33246182                   | 0.534111447                          | 168.0117487                              |
| 6.876918032                                 | 0.888605679                  | 0.256378351                  | 0.529187089                          | 154.418469                               |
| 4.551489126                                 | 0.905066438                  | 0.351418955                  | 0.529515501                          | 107.0465308                              |
| 8.183363746                                 | 0.924031347                  | 0.34973292                   | 0.512988823                          | 185.3119852                              |
| 12.99102642                                 | 0.876815742                  | 0.217627792                  | 0.531073703                          | 307.7830152                              |
| 12.93332307                                 | 0.873522904                  | 0.180214805                  | 0.503886317                          | 225.6914934                              |
| 13.30806521                                 | 0.905531745                  | 0.254144809                  | 0.45242428                           | 157.9986665                              |
| 11.40264692                                 | 0.908042952                  | 0.367121285                  | 0.532958603                          | 144.9324307                              |
| 4.924338681                                 | 0.884189141                  | 0.31325741                   | 0.53213594                           | 91.19364125                              |
| 11.9019253                                  | 0.875106701                  | 0.195380097                  | 0.539605015                          | 164.0027766                              |
| 4.247150851                                 | 0.895650625                  | 0.35394839                   | 0.514316774                          | 78.40827367                              |
| 9.14597927                                  | 0.925448889                  | 0.295481818                  | 0.520345063                          | 341.0054929                              |
| 7.774205592                                 | 0.891913281                  | 0.271735518                  | 0.59809692                           | 160.8296099                              |
| 9.130381509                                 | 0.869603694                  | 0.221340804                  | 0.525324447                          | 160.551731                               |
| 8.805470048                                 | 0.888450167                  | 0.258550605                  | 0.53719178                           | 181.672708                               |
| 5.181432029                                 | 0.922492324                  | 0.423056687                  | 0.557181697                          | 102.4251675                              |
| 13.62739047                                 | 0.904106006                  | 0.303424579                  | 0.525136672                          | 263.2930777                              |
| 11.53261883                                 | 0.919178262                  | 0.273047386                  | 0.566709925                          | 429.957768                               |
| 11.7632207                                  | 0.899076238                  | 0.229496099                  | 0.490720958                          | 194.1625394                              |
| 6.767202396                                 | 0.901993814                  | 0.299392195                  | 0.547476062                          | 127.1248442                              |
| 4.641399776                                 | 0.876776266                  | 0.301055356                  | 0.500495539                          | 69.43896784                              |
| 6.699567907                                 | 0.899449786                  | 0.273676344                  | 0.544462148                          | 143.2416147                              |
| 8.666716875                                 | 0.902876295                  | 0.291661089                  | 0.561737887                          | 158.7141858                              |
| 12.53006957                                 | 0.870089259                  | 0.190584151                  | 0.479844408                          | 268.8051878                              |
| 9.111958447                                 | 0.913069036                  | 0.297282869                  | 0.581490322                          | 174.7747835                              |
| 9.664387326                                 | 0.913544804                  | 0.332518514                  | 0.572089317                          | 203.6856167                              |
| 9.34206438                                  | 0.913304908                  | 0.293971953                  | 0.532056905                          | 206.9916825                              |
| 13.39982189                                 | 0.885832551                  | 0.221752042                  | 0.466787851                          | 340.311429                               |
| 15.33464314                                 | 0.874710691                  | 0.174811098                  | 0.458497137                          | 455.1834684                              |
| 12.00502564                                 | 0.919602795                  | 0.39083655                   | 0.552516166                          | 215.4187987                              |
| 5.070422881                                 | 0.882945063                  | 0.265433465                  | 0.53911805                           | 137.0760126                              |
| 7.33877342                                  | 0.944138009                  | 0.3764383                    | 0.584062989                          | 536.3432465                              |
| 9.119516897                                 | 0.901774031                  | 0.236094628                  | 0.553124556                          | 207.6247789                              |
| 5.228762476                                 | 0.937729956                  | 0.407099915                  | 0.523548731                          | 166.4004972                              |
| 11.65602008                                 | 0.878934263                  | 0.20410318                   | 0.506545812                          | 305.7721488                              |
| 9.855442696                                 | 0.885320285                  | 0.22413138                   | 0.558433053                          | 176.1822722                              |
| 6.270565252                                 | 0.924787261                  | 0.388852513                  | 0.573068886                          | 126.9897131                              |
| 11.07881897                                 | 0.890485527                  | 0.241169494                  | 0.534499343                          | 217.2639648                              |
| 8.300924268                                 | 0.924420767                  | 0.321203388                  | 0.518220111                          | 235.2160999                              |
| 5.141083413                                 | 0.890104583                  | 0.293470699                  | 0.537937587                          | 123.2985595                              |
| 8.645482887                                 | 0.882561917                  | 0.213952709                  | 0.568995103                          | 158.3897765                              |
| 11.80795234                                 | 0.876941901                  | 0.197522411                  | 0.504889841                          | 322.7626682                              |
| 10.4060973                                  | 0.891071774                  | 0.253496073                  | 0.518686033                          | 147.305496                               |
| 11.1461828                                  | 0.905114374                  | 0.222938812                  | 0.527757227                          | 284.2192912                              |
| 4.896236814                                 | 0.937929276                  | 0.477973189                  | 0.562982424                          | 109.3072492                              |
| 7.17592097                                  | 0.917402295                  | 0.291610617                  | 0.465354405                          | 327.5114423                              |
| 14.17351219                                 | 0.872714764                  | 0.184495002                  | 0.54846285                           | 244.2681768                              |
| 9.631933829                                 | 0.891007793                  | 0.232370075                  | 0.571333439                          | 169.3731358                              |
| 8.789881137                                 | 0.9065455                    | 0.313182128                  | 0.543343461                          | 195.988197                               |
| 10.26771079                                 | 0.893374629                  | 0.232923969                  | 0.495998584                          | 264.418615                               |
| 9.370518771                                 | 0.875055066                  | 0.224384416                  | 0.472364152                          | 164.3984537                              |
| 7.44680473                                  | 0.936445861                  | 0.417503932                  | 0.528116326                          | 274.2296851                              |
| 10.10646973                                 | 0.896444596                  | 0.246373138                  | 0.495184247                          | 232.5983765                              |
| 11.58734809                                 | 0.901593124                  | 0.220162812                  | 0.52574515                           | 341.5030806                              |
| 12.35934416                                 | 0.918886923                  | 0.262642609                  | 0.5429105                            | 404.4784329                              |
| 9.455468149                                 | 0.906779613                  | 0.236285985                  | 0.587101447                          | 249.4562691                              |
| 7.656320914                                 | 0.885036818                  | 0.258537451                  | 0.46769627                           | 145.7080035                              |
| 11.63857841                                 | 0.896946912                  | 0.209681043                  | 0.479938852                          | 299.6984553                              |
| 10.33473893                                 | 0.856959239                  | 0.207939736                  | 0.491431886                          | 186.4868797                              |
| 10.1112848                                  | 0.916284125                  | 0.243258359                  | 0.517635973                          | 348.1971385                              |
| 5.974716331                                 | 0.922316285                  | 0.338806246                  | 0.593541957                          | 185.2452141                              |
| 8.126709805                                 | 0.899332997                  | 0.251286731                  | 0.553278372                          | 243.0800534                              |
| 8.967997815                                 | 0.869531404                  | 0.225740129                  | 0.509000295                          | 161.8233215                              |
| 12.32334105                                 | 0.90892799                   | 0.286556373                  | 0.479916049                          | 295.5268589                              |
| 11.69798276                                 | 0.880264795                  | 0.215625441                  | 0.51885051                           | 168.664371                               |
| 8.435577342                                 | 0.888475856                  | 0.249028587                  | 0.502409687                          | 141.8648478                              |
| 8.239499103                                 | 0.928744999                  | 0.353754841                  | 0.583498884                          | 179.0592309                              |
| 5.19127634                                  | 0.886244536                  | 0.278521718                  | 0.518904234                          | 137.3764068                              |
| 7.645713165                                 | 0.907718104                  | 0.247101249                  | 0.541446429                          | 279.1255384                              |
| 15.80526809                                 | 0.86053908                   | 0.160928301                  | 0.488942078                          | 375.2178271                              |
| 8.760803366                                 | 0.895452575                  | 0.23776632                   | 0.56446227                           | 228.9371038                              |
| 6.883795202                                 | 0.916774623                  | 0.327521449                  | 0.518701974                          | 171.6900836                              |
| 14.53324961                                 | 0.899032507                  | 0.208380918                  | 0.498749867                          | 317.876099                               |
| 7.930777229                                 | 0.879181456                  | 0.238880602                  | 0.554578077                          | 179.5158338                              |
| 10.95505515                                 | 0.892331147                  | 0.293524733                  | 0.487443361                          | 146.6415132                              |
| 5.639441679                                 | 0.906789155                  | 0.303436156                  | 0.51950415                           | 136.0173844                              |
| 8.229054452                                 | 0.909975731                  | 0.323305781                  | 0.572618673                          | 187.0370516                              |
| 9.767816255                                 | 0.88864853                   | 0.251931791                  | 0.503399134                          | 336.9674571                              |
| 10.24772186                                 | 0.887667128                  | 0.239795228                  | 0.506547968                          | 233.9415527                              |
| 8.202695298                                 | 0.920188393                  | 0.396873442                  | 0.578954346                          | 134.8608473                              |
| 8.859986752                                 | 0.909384576                  | 0.282716098                  | 0.494541179                          | 224.8290671                              |
| 8.839874535                                 | 0.892550746                  | 0.22971745                   | 0.56697278                           | 222.6015842                              |
| 9.544090972                                 | 0.900675686                  | 0.26351359                   | 0.566358372                          | 335.362795                               |
| 6.890175702                                 | 0.917596264                  | 0.354826575                  | 0.552822716                          | 161.8787957                              |
| 6.639930466                                 | 0.920686804                  | 0.288798196                  | 0.544672454                          | 205.8581519                              |
| 7.52533467                                  | 0.904923772                  | 0.28662464                   | 0.579692269                          | 179.7547514                              |
| 4.883847991                                 | 0.902188186                  | 0.303083971                  | 0.553318286                          | 154.0912271                              |
| 14.32767368                                 | 0.899587331                  | 0.190692628                  | 0.527212091                          | 360.7574127                              |
| 9.215076123                                 | 0.887804966                  | 0.240909874                  | 0.559290408                          | 198.9088051                              |
| 9.581147405                                 | 0.874768275                  | 0.217343055                  | 0.496525536                          | 261.2347293                              |
| 7.415559014                                 | 0.862192438                  | 0.244851062                  | 0.475161684                          | 149.6918365                              |
| 10.50717995                                 | 0.912053478                  | 0.262329362                  | 0.511395091                          | 378.8853898                              |

| log.sigma.3.5.mm.3D_glc_m_SumEntropy | log.sigma.3.5.mm.3D_glc_m_AverageIntensity | log.sigma.3.5.mm.3D_glc_m_Energy | log.sigma.3.5.mm.3D_glc_m_SumSquares | log.sigma.3.5.mm.3D_glc_m_ClusterProminence |
|--------------------------------------|--------------------------------------------|----------------------------------|--------------------------------------|---------------------------------------------|
| 5.361566141                          | 17.68522246                                | 0.003542849                      | 38.35344586                          | 41653.45789                                 |
| 5.225919823                          | 13.94403944                                | 0.005518655                      | 36.57450552                          | 28905.90626                                 |
| 5.294634302                          | 14.88846903                                | 0.003665069                      | 36.61248002                          | 25424.15105                                 |
| 5.319790835                          | 14.21693071                                | 0.004708983                      | 43.16646022                          | 39654.22923                                 |
| 5.281156933                          | 13.1269944                                 | 0.003806674                      | 32.37909499                          | 24508.52606                                 |
| 5.202282683                          | 15.90535684                                | 0.005868825                      | 37.96960433                          | 29506.1717                                  |
| 4.728311303                          | 13.55698156                                | 0.01889651                       | 17.48684966                          | 11837.49936                                 |
| 5.148794754                          | 18.43160414                                | 0.004853241                      | 27.53344467                          | 24181.36623                                 |
| 4.924942704                          | 12.57688523                                | 0.008469803                      | 21.58855239                          | 15052.26797                                 |
| 4.932605535                          | 11.99526921                                | 0.005845038                      | 19.84505058                          | 9788.401502                                 |
| 4.574693413                          | 10.03878051                                | 0.011061247                      | 11.7774507                           | 4034.074227                                 |
| 4.822594773                          | 13.34697839                                | 0.009780865                      | 18.04305378                          | 10634.04141                                 |
| 5.270124964                          | 17.16749663                                | 0.004458011                      | 38.29749759                          | 29984.54704                                 |
| 5.348060041                          | 14.53533061                                | 0.003609662                      | 40.53644724                          | 31110.40873                                 |
| 5.096115417                          | 12.21967367                                | 0.004936579                      | 29.10701129                          | 21791.3602                                  |
| 5.02379618                           | 11.48881401                                | 0.011944382                      | 25.2672799                           | 16492.77901                                 |
| 4.654550251                          | 9.17277858                                 | 0.008295539                      | 13.25054476                          | 4430.865336                                 |
| 5.253777397                          | 12.03256992                                | 0.004760028                      | 37.42435702                          | 30675.31692                                 |
| 4.486285429                          | 8.540439031                                | 0.011797579                      | 10.61259055                          | 3362.327857                                 |
| 5.001769715                          | 18.3842816                                 | 0.006147294                      | 21.07061048                          | 17694.76432                                 |
| 5.122581887                          | 12.08562541                                | 0.004781277                      | 24.7802458                           | 14980.15467                                 |
| 5.120178599                          | 12.08471084                                | 0.005163956                      | 27.59139192                          | 17396.38555                                 |
| 5.048978246                          | 12.99272362                                | 0.005832604                      | 24.97207578                          | 15509.53837                                 |
| 4.523796008                          | 9.798163235                                | 0.018513115                      | 11.50113329                          | 5223.000819                                 |
| 5.223943291                          | 15.91202745                                | 0.007629051                      | 31.68297908                          | 24259.7881                                  |
| 5.199880959                          | 20.47519514                                | 0.005320324                      | 31.01751061                          | 31545.67765                                 |
| 5.202556584                          | 13.59571025                                | 0.004207359                      | 31.54904539                          | 24520.93073                                 |
| 4.897571409                          | 10.83645606                                | 0.006544368                      | 18.18286595                          | 9397.469347                                 |
| 4.304708532                          | 7.953083932                                | 0.01671124                       | 12.464625                            | 3795.9312                                   |
| 4.941264025                          | 11.52786386                                | 0.005666486                      | 19.44163618                          | 10684.83838                                 |
| 5.07845996                           | 12.08346878                                | 0.005138095                      | 24.19558552                          | 16077.03029                                 |
| 5.266717314                          | 16.06230255                                | 0.003766755                      | 36.54082833                          | 24024.93905                                 |
| 5.114203248                          | 12.73439398                                | 0.005892847                      | 25.84507229                          | 21142.68822                                 |
| 5.04391604                           | 13.90566662                                | 0.007765104                      | 24.83609168                          | 13638.91297                                 |
| 5.032587416                          | 14.09781598                                | 0.005728941                      | 23.41976869                          | 13960.32499                                 |
| 5.28339791                           | 18.28940304                                | 0.003465955                      | 33.54788645                          | 25742.5037                                  |
| 5.466880474                          | 21.15310759                                | 0.002843602                      | 45.23896279                          | 46073.59029                                 |
| 5.001993076                          | 14.33988334                                | 0.01813324                       | 26.41942145                          | 18935.85466                                 |
| 4.78980533                           | 11.31608967                                | 0.007169455                      | 16.76381776                          | 6648.468831                                 |
| 4.87369499                           | 23.01561884                                | 0.010898248                      | 17.86032275                          | 12130.64728                                 |
| 5.170411856                          | 14.02120733                                | 0.004451293                      | 28.27597889                          | 17915.98409                                 |
| 4.471866968                          | 12.70155144                                | 0.017501165                      | 11.31999976                          | 5153.715777                                 |
| 5.426880063                          | 17.18556939                                | 0.003190565                      | 40.33081344                          | 36172.17593                                 |
| 5.231863737                          | 12.68837679                                | 0.003953682                      | 31.23062948                          | 23579.5512                                  |
| 4.634423203                          | 10.89511725                                | 0.015927281                      | 14.81364314                          | 9914.86088                                  |
| 5.261276893                          | 14.32276299                                | 0.003825971                      | 32.27120763                          | 22056.06467                                 |
| 4.913739419                          | 15.15551872                                | 0.006636803                      | 19.28050269                          | 10619.16332                                 |
| 4.660776533                          | 10.73092997                                | 0.009228107                      | 15.11008073                          | 5323.614337                                 |
| 5.115267154                          | 11.95154242                                | 0.00550345                       | 30.17099506                          | 23484.88876                                 |
| 5.238282162                          | 17.66319759                                | 0.00493907                       | 35.3743005                           | 30162.77641                                 |
| 5.066087147                          | 11.57727734                                | 0.005655757                      | 27.57893847                          | 20054.16015                                 |
| 5.262910907                          | 16.6090525                                 | 0.003748017                      | 30.74162771                          | 28846.21732                                 |
| 4.337548816                          | 10.18450368                                | 0.028924928                      | 10.08635173                          | 5458.506133                                 |
| 4.78888786                           | 18.08870391                                | 0.007085604                      | 17.13225754                          | 7982.196629                                 |
| 5.440902159                          | 15.02274676                                | 0.003517258                      | 46.05627933                          | 41860.51966                                 |
| 5.208280703                          | 12.36763796                                | 0.004275143                      | 30.73738301                          | 24630.13778                                 |
| 5.017624256                          | 13.61996969                                | 0.006406082                      | 22.57071531                          | 13708.52661                                 |
| 5.138108813                          | 16.00929146                                | 0.003978514                      | 28.27403501                          | 14589.19519                                 |
| 5.052062235                          | 12.36962403                                | 0.004663466                      | 24.83541398                          | 13143.80228                                 |
| 4.656415395                          | 16.44632145                                | 0.01953313                       | 15.10358014                          | 8985.977179                                 |
| 5.103355893                          | 14.95564797                                | 0.004564728                      | 26.09475081                          | 15104.25719                                 |
| 5.312103858                          | 18.26400298                                | 0.003645509                      | 31.90612426                          | 28761.54716                                 |
| 5.295198442                          | 19.89072631                                | 0.004153649                      | 31.06177617                          | 26474.63381                                 |
| 5.285837979                          | 15.39454508                                | 0.003883264                      | 30.46649752                          | 25376.32213                                 |
| 4.872118465                          | 11.69165445                                | 0.006062324                      | 19.28409588                          | 8687.956836                                 |
| 5.263053014                          | 17.12615298                                | 0.003362726                      | 30.60028668                          | 24616.37327                                 |
| 5.100510896                          | 13.11306985                                | 0.005108511                      | 29.64971042                          | 18001.6787                                  |
| 5.150834495                          | 18.50660536                                | 0.004486267                      | 26.31275596                          | 22539.78598                                 |
| 4.863093401                          | 13.2785004                                 | 0.00768699                       | 17.0263054                           | 8825.720936                                 |
| 5.113129212                          | 15.21673347                                | 0.004535592                      | 24.37757309                          | 14463.52431                                 |
| 5.050940392                          | 12.16190218                                | 0.005530827                      | 27.2500325                           | 14483.31743                                 |
| 5.125831686                          | 17.08565755                                | 0.005775902                      | 27.17359427                          | 18651.98294                                 |
| 5.247477615                          | 12.37148164                                | 0.0038747                        | 33.9253602                           | 24149.04732                                 |
| 4.986480923                          | 11.42944177                                | 0.005477312                      | 22.5504757                           | 12022.17695                                 |
| 4.93552087                           | 13.03910831                                | 0.010966718                      | 21.08514268                          | 17593.21717                                 |
| 4.751513598                          | 11.37825018                                | 0.006972583                      | 15.30853954                          | 5364.726017                                 |
| 5.067016119                          | 16.47805032                                | 0.004845326                      | 22.97404785                          | 13696.57558                                 |
| 5.354690554                          | 19.11085556                                | 0.004765845                      | 47.05586823                          | 52675.41961                                 |
| 5.188879048                          | 14.67075678                                | 0.004432852                      | 27.21984113                          | 19697.63382                                 |
| 4.774853466                          | 12.81776975                                | 0.008271609                      | 16.08698998                          | 8251.623109                                 |
| 5.337640495                          | 17.5958584                                 | 0.003673116                      | 37.28253006                          | 40388.9836                                  |
| 5.094317597                          | 12.87553488                                | 0.004978469                      | 24.83306303                          | 14617.94136                                 |
| 5.059368122                          | 11.6094822                                 | 0.006478574                      | 25.32246106                          | 15056.75585                                 |
| 4.741692857                          | 11.33381587                                | 0.007647212                      | 14.68147563                          | 6161.516596                                 |
| 4.995891327                          | 13.25261336                                | 0.008074479                      | 21.94586505                          | 14802.4048                                  |
| 4.829356293                          | 18.08158183                                | 0.009607618                      | 25.21611645                          | 18679.9661                                  |
| 5.152736101                          | 14.92900942                                | 0.004426518                      | 27.93740268                          | 17384.0571                                  |
| 4.81868797                           | 11.15831437                                | 0.015553037                      | 18.93696326                          | 13749.54886                                 |
| 4.971244087                          | 14.75475531                                | 0.006158278                      | 21.44588055                          | 12033.32328                                 |
| 5.206170258                          | 14.45926987                                | 0.004132711                      | 28.7685135                           | 19216.27376                                 |
| 5.145691481                          | 18.0565166                                 | 0.005669476                      | 27.98248437                          | 23451.4948                                  |
| 4.806457054                          | 12.38616884                                | 0.010174116                      | 16.81072711                          | 9248.15978                                  |
| 4.915509266                          | 14.06364098                                | 0.005772018                      | 18.55477328                          | 10122.51645                                 |
| 5.069807335                          | 12.93732212                                | 0.0051064                        | 22.49038707                          | 13788.21682                                 |
| 4.760301709                          | 12.08328062                                | 0.006963192                      | 14.57742977                          | 5212.130987                                 |
| 5.501957196                          | 18.69674664                                | 0.00265681                       | 42.13132996                          | 44836.16697                                 |
| 5.209982438                          | 13.57251164                                | 0.003907014                      | 28.11012663                          | 17951.03074                                 |
| 4.963276947                          | 15.7786254                                 | 0.006486249                      | 26.20788765                          | 16944.68504                                 |
| 4.743790867                          | 11.83820551                                | 0.008679316                      | 20.30665608                          | 9261.967043                                 |
| 5.169187605                          | 19.37057418                                | 0.004468029                      | 25.37881491                          | 18621.42117                                 |

| log.sigma.3.5.mm.3D_glc_m_SumAverage | log.sigma.3.5.mm.3D_glc_m_lmc2 | log.sigma.3.5.mm.3D_glc_m_lmc1 | log.sigma.3.5.mm.3D_glc_m_DifferenceAverage | log.sigma.3.5.mm.3D_glc_m_Id |
|--------------------------------------|--------------------------------|--------------------------------|---------------------------------------------|------------------------------|
| 34.78744279                          | 0.82243388                     | -0.126892871                   | 4.791241929                                 | 0.294940684                  |
| 27.80987966                          | 0.948821778                    | -0.25946058                    | 4.725066367                                 | 0.287095971                  |
| 29.56090115                          | 0.852237286                    | -0.149721727                   | 4.77793122                                  | 0.290468122                  |
| 28.21092741                          | 0.956541883                    | -0.268828112                   | 5.084814785                                 | 0.272169476                  |
| 26.16634543                          | 0.814114442                    | -0.128641971                   | 4.048908978                                 | 0.313845355                  |
| 31.52696685                          | 0.972101052                    | -0.319736919                   | 4.495726559                                 | 0.292552961                  |
| 26.85546638                          | 0.796017791                    | -0.138750472                   | 2.632139188                                 | 0.476583311                  |
| 36.40290398                          | 0.706599612                    | -0.08716012                    | 3.940801385                                 | 0.351769048                  |
| 25.04698587                          | 0.75700237                     | -0.116473878                   | 3.157947473                                 | 0.407878407                  |
| 23.99053842                          | 0.816767138                    | -0.139133192                   | 3.370801584                                 | 0.347456237                  |
| 20.07756102                          | 0.738434186                    | -0.117657565                   | 2.489088043                                 | 0.427463581                  |
| 26.56260878                          | 0.752415606                    | -0.111922973                   | 2.926827703                                 | 0.422251348                  |
| 33.94436549                          | 0.863716061                    | -0.158298685                   | 4.593473128                                 | 0.306325328                  |
| 28.71009238                          | 0.893460234                    | -0.177270238                   | 4.995591479                                 | 0.273398062                  |
| 24.136785                            | 0.780188315                    | -0.115756902                   | 4.068808994                                 | 0.338668222                  |
| 22.9445373                           | 0.847923495                    | -0.165939238                   | 3.282281662                                 | 0.433265296                  |
| 18.34555716                          | 0.766697483                    | -0.121091323                   | 2.702591996                                 | 0.396326174                  |
| 24.00035058                          | 0.928447772                    | -0.221911967                   | 4.620985287                                 | 0.28843329                   |
| 17.08087806                          | 0.752316431                    | -0.12324154                    | 2.404810061                                 | 0.429583862                  |
| 36.32932048                          | 0.706980975                    | -0.091823059                   | 3.349805993                                 | 0.376782035                  |
| 24.16635953                          | 0.786315301                    | -0.124169438                   | 3.407704464                                 | 0.358157443                  |
| 24.16942167                          | 0.880952246                    | -0.17694282                    | 4.062686826                                 | 0.313505005                  |
| 25.94913717                          | 0.887850928                    | -0.185932144                   | 3.67032636                                  | 0.346881289                  |
| 19.59632647                          | 0.772342332                    | -0.132239557                   | 2.19778441                                  | 0.486860877                  |
| 31.44368425                          | 0.884267687                    | -0.18435156                    | 3.856151285                                 | 0.379674612                  |
| 40.60867743                          | 0.809068644                    | -0.130793008                   | 3.771905455                                 | 0.355334969                  |
| 26.80272133                          | 0.784390178                    | -0.117853935                   | 4.23311777                                  | 0.318687689                  |
| 21.65703524                          | 0.741916331                    | -0.106865632                   | 3.046626544                                 | 0.382707593                  |
| 15.90616786                          | 0.943978501                    | -0.303457067                   | 2.749009808                                 | 0.387587974                  |
| 23.04196114                          | 0.771590017                    | -0.117495827                   | 3.236307361                                 | 0.361472305                  |
| 24.10996923                          | 0.749129961                    | -0.109526491                   | 3.38177653                                  | 0.373180987                  |
| 31.74950767                          | 0.847295776                    | -0.14540327                    | 4.843926099                                 | 0.282771397                  |
| 25.31840415                          | 0.800571285                    | -0.12766102                    | 3.383079628                                 | 0.378186772                  |
| 27.57424987                          | 0.830118277                    | -0.147003246                   | 3.200142667                                 | 0.407134861                  |
| 27.93834617                          | 0.718047127                    | -0.094643479                   | 3.374702177                                 | 0.375755719                  |
| 36.05891283                          | 0.766816333                    | -0.105314836                   | 4.617398728                                 | 0.308771832                  |
| 41.6949174                           | 0.841748736                    | -0.140972268                   | 5.607430249                                 | 0.265298767                  |
| 28.384438                            | 0.865303892                    | -0.173159644                   | 3.1985577                                   | 0.454355714                  |
| 22.63217933                          | 0.833186724                    | -0.154735896                   | 3.13026096                                  | 0.357448321                  |
| 45.87933116                          | 0.774088399                    | -0.124008824                   | 2.640053271                                 | 0.446114398                  |
| 27.75866445                          | 0.803934561                    | -0.126179316                   | 3.837797314                                 | 0.326808208                  |
| 25.35033968                          | 0.724885612                    | -0.110463163                   | 2.26830789                                  | 0.473474114                  |
| 33.84940484                          | 0.822951137                    | -0.139178529                   | 4.933494766                                 | 0.292801175                  |
| 25.24178562                          | 0.804162821                    | -0.12384125                    | 4.047927575                                 | 0.316133735                  |
| 21.7783397                           | 0.824333986                    | -0.15692615                    | 2.466681146                                 | 0.45632968                   |
| 28.34529528                          | 0.76936241                     | -0.109628465                   | 4.123585118                                 | 0.327997043                  |
| 30.04385218                          | 0.726868271                    | -0.099450301                   | 3.066942559                                 | 0.399021295                  |
| 21.46185994                          | 0.853552182                    | -0.17147805                    | 2.920115312                                 | 0.380725775                  |
| 23.81015859                          | 0.926042095                    | -0.22509998                    | 4.00017457                                  | 0.308772742                  |
| 34.94843308                          | 0.928659238                    | -0.222155108                   | 4.685308596                                 | 0.2893633                    |
| 23.07506505                          | 0.80232543                     | -0.125844185                   | 3.84777394                                  | 0.339833831                  |
| 32.76464235                          | 0.755606565                    | -0.101252317                   | 4.140731174                                 | 0.31462498                   |
| 20.36365011                          | 0.786144685                    | -0.145327961                   | 1.941617687                                 | 0.531355544                  |
| 35.77141991                          | 0.764813054                    | -0.119856328                   | 3.175827566                                 | 0.375054736                  |
| 29.65697286                          | 0.90665761                     | -0.187452899                   | 5.047352964                                 | 0.276761245                  |
| 24.65979785                          | 0.833564147                    | -0.14215647                    | 3.94641301                                  | 0.323491812                  |
| 27.13481998                          | 0.760069455                    | -0.115849915                   | 3.254402016                                 | 0.391534885                  |
| 31.67981847                          | 0.737340265                    | -0.097731649                   | 4.100790118                                 | 0.321961499                  |
| 24.71683725                          | 0.818832046                    | -0.133723895                   | 4.018049881                                 | 0.31675961                   |
| 32.65498787                          | 0.788327088                    | -0.133509966                   | 2.496653873                                 | 0.480551556                  |
| 29.68094655                          | 0.786116727                    | -0.116284989                   | 3.860775968                                 | 0.334725196                  |
| 36.03758007                          | 0.76590111                     | -0.104342001                   | 4.314137017                                 | 0.310439815                  |
| 39.3713034                           | 0.729059888                    | -0.095768796                   | 3.970471811                                 | 0.346265566                  |
| 30.47132429                          | 0.797579841                    | -0.120646784                   | 3.835243542                                 | 0.327381643                  |
| 23.38330889                          | 0.81882241                     | -0.139467893                   | 3.513376318                                 | 0.347207591                  |
| 33.78158078                          | 0.703575711                    | -0.083075095                   | 4.420700872                                 | 0.301750247                  |
| 26.22613971                          | 0.905491544                    | -0.198826329                   | 4.372564724                                 | 0.301868893                  |
| 36.58255637                          | 0.694531512                    | -0.084861492                   | 3.879925853                                 | 0.332126028                  |
| 26.48706069                          | 0.737183025                    | -0.10840906                    | 2.700344461                                 | 0.41596106                   |
| 30.32632455                          | 0.758679375                    | -0.106489638                   | 3.592943976                                 | 0.340736812                  |
| 24.32380436                          | 0.892238254                    | -0.190214413                   | 4.075618441                                 | 0.317184954                  |
| 33.64113654                          | 0.753127074                    | -0.103824954                   | 3.906132587                                 | 0.364666035                  |
| 24.61641474                          | 0.801717183                    | -0.121178953                   | 4.41561262                                  | 0.30577093                   |
| 22.84699705                          | 0.810211717                    | -0.131396019                   | 3.65565316                                  | 0.339067862                  |
| 25.87466069                          | 0.802765783                    | -0.137074951                   | 2.890477448                                 | 0.426903936                  |
| 22.75650036                          | 0.774350944                    | -0.123175683                   | 3.033772564                                 | 0.368097468                  |
| 32.67808014                          | 0.753252912                    | -0.106643897                   | 3.560977355                                 | 0.338332204                  |
| 37.55901402                          | 0.962949406                    | -0.281595949                   | 5.61725136                                  | 0.253509962                  |
| 29.25017277                          | 0.811460101                    | -0.129248278                   | 3.754537037                                 | 0.329681826                  |
| 25.57862011                          | 0.772044992                    | -0.120236265                   | 2.833161822                                 | 0.406454396                  |
| 34.61655198                          | 0.820793724                    | -0.126747195                   | 4.702140911                                 | 0.297878056                  |
| 25.75106977                          | 0.825660785                    | -0.140018186                   | 3.709219216                                 | 0.330264286                  |
| 23.18581984                          | 0.789269705                    | -0.12865412                    | 3.715833503                                 | 0.373593492                  |
| 22.66465717                          | 0.718520442                    | -0.102046093                   | 2.861421112                                 | 0.387428932                  |
| 26.43861879                          | 0.793000105                    | -0.128853719                   | 3.114102742                                 | 0.400177681                  |
| 36.03013122                          | 0.856378235                    | -0.16876727                    | 3.807294291                                 | 0.339064095                  |
| 29.68538074                          | 0.794453754                    | -0.123413031                   | 3.976881497                                 | 0.328559041                  |
| 22.2768421                           | 0.825509274                    | -0.150652678                   | 2.671896395                                 | 0.461450991                  |
| 29.30191799                          | 0.769884443                    | -0.1128911                     | 3.427865663                                 | 0.366539639                  |
| 28.76114675                          | 0.807378916                    | -0.12612928                    | 3.867368374                                 | 0.321680082                  |
| 35.77778699                          | 0.87934158                     | -0.176445139                   | 3.69162316                                  | 0.349367583                  |
| 24.72074634                          | 0.788631163                    | -0.13423012                    | 2.725430738                                 | 0.427256283                  |
| 28.00095554                          | 0.704524559                    | -0.091186076                   | 3.101920956                                 | 0.374427519                  |
| 25.83499418                          | 0.751696684                    | -0.108474935                   | 3.273115855                                 | 0.370735256                  |
| 24.16656123                          | 0.6960559                      | -0.097699549                   | 2.782984427                                 | 0.388417764                  |
| 36.79781529                          | 0.789132751                    | -0.11105994                    | 4.997336286                                 | 0.281585081                  |
| 27.08816055                          | 0.755989238                    | -0.107336686                   | 3.822313236                                 | 0.331043275                  |
| 31.51868387                          | 0.927108502                    | -0.230718828                   | 4.030741974                                 | 0.311928305                  |
| 23.67641103                          | 0.906765325                    | -0.216661398                   | 3.665843128                                 | 0.334491488                  |
| 38.24779711                          | 0.694319727                    | -0.085895795                   | 3.820629576                                 | 0.346863449                  |

| log.sigma.3.5.mm.3D_glcm_ClusterTendency | log.sigma.3.5.mm.3D_firstorder_InterquartileRange | log.sigma.3.5.mm.3D_firstorder_Skewness | log.sigma.3.5.mm.3D_firstorder_Uniformity |
|------------------------------------------|---------------------------------------------------|-----------------------------------------|-------------------------------------------|
| 113.4481962                              | 207.0096331                                       | 0.410281899                             | 0.046337505                               |
| 108.8884614                              | 206.9379044                                       | -0.311270958                            | 0.054024201                               |
| 105.5145316                              | 227.1638145                                       | -0.150331853                            | 0.046748376                               |
| 127.091068                               | 223.3964481                                       | -0.197060169                            | 0.046101616                               |
| 100.5711337                              | 229.5125008                                       | 0.073894517                             | 0.050506776                               |
| 113.9695388                              | 222.8029938                                       | -0.280242146                            | 0.047469435                               |
| 51.07546514                              | 97.30997849                                       | 0.670736254                             | 0.092988265                               |
| 81.18970335                              | 175.681345                                        | 0.563225393                             | 0.056028328                               |
| 64.09112583                              | 137.9048986                                       | 0.745362235                             | 0.069665114                               |
| 60.69696239                              | 167.4220028                                       | 0.139245426                             | 0.061139424                               |
| 36.07942682                              | 104.3728542                                       | 0.376655882                             | 0.090200633                               |
| 52.67638355                              | 115.1868534                                       | 0.557605684                             | 0.076309079                               |
| 114.0501687                              | 242.5707817                                       | -0.521044144                            | 0.051616111                               |
| 117.5012915                              | 243.1836872                                       | -0.100924526                            | 0.045026234                               |
| 79.93716668                              | 183.417469                                        | 0.710054896                             | 0.05678448                                |
| 76.67226362                              | 159.2619572                                       | 0.289797981                             | 0.068407649                               |
| 40.58770068                              | 132.9809875                                       | 0.090718723                             | 0.07312018                                |
| 113.6443497                              | 231.9689217                                       | -0.043880647                            | 0.049527442                               |
| 32.14956127                              | 101.7218676                                       | 0.285492581                             | 0.087915136                               |
| 65.03907756                              | 143.2679825                                       | 0.310936188                             | 0.063069434                               |
| 79.06637686                              | 202.382864                                        | -0.039787473                            | 0.055534353                               |
| 84.04463718                              | 192.0089512                                       | -0.171721857                            | 0.057565362                               |
| 75.94798257                              | 175.8500023                                       | -0.001062425                            | 0.058413946                               |
| 35.83051811                              | 82.71870995                                       | 0.55242974                              | 0.104444295                               |
| 93.85954303                              | 199.4877329                                       | 0.135559028                             | 0.054174315                               |
| 97.08586867                              | 190.6229496                                       | 0.598231008                             | 0.054659814                               |
| 89.23320335                              | 211.4542561                                       | 0.508741506                             | 0.05190567                                |
| 55.78971071                              | 146.1576691                                       | 0.378642789                             | 0.066360599                               |
| 37.29388662                              | 120.762394                                        | 0.609002646                             | 0.092794145                               |
| 59.61598175                              | 163.8355598                                       | 0.174428577                             | 0.06179777                                |
| 74.31020584                              | 179.580555                                        | 0.44874502                              | 0.057010103                               |
| 104.0068348                              | 250.2879934                                       | -0.276806825                            | 0.048516452                               |
| 79.10821568                              | 162.3759499                                       | 0.546407922                             | 0.059717822                               |
| 74.68298497                              | 164.8654976                                       | 0.352725218                             | 0.065548397                               |
| 68.50743462                              | 163.9578857                                       | 0.562277639                             | 0.061138986                               |
| 97.07920758                              | 212.353138                                        | -0.314304739                            | 0.04912572                                |
| 133.699207                               | 238.0595226                                       | -0.51416895                             | 0.043703284                               |
| 78.92136435                              | 139.3340378                                       | 0.31337883                              | 0.080500817                               |
| 51.49812837                              | 143.7699385                                       | -0.339499566                            | 0.071192602                               |
| 54.98688322                              | 113.1362343                                       | 0.542599067                             | 0.080859024                               |
| 84.25590046                              | 205.8963118                                       | 0.253659075                             | 0.053128759                               |
| 33.48668221                              | 78.98153305                                       | 0.69914791                              | 0.109385164                               |
| 117.2487471                              | 247.0112934                                       | -0.016716193                            | 0.044110856                               |
| 94.30385194                              | 212.5146008                                       | 0.310856982                             | 0.050440389                               |
| 46.20303113                              | 97.73148632                                       | 0.54845646                              | 0.091324899                               |
| 94.37952941                              | 207.871582                                        | 0.319756809                             | 0.050395322                               |
| 56.21722866                              | 143.4560795                                       | 0.449061228                             | 0.06734626                                |
| 46.45969473                              | 137.1125183                                       | -0.231947936                            | 0.077770542                               |
| 91.92054634                              | 190.8912048                                       | 0.266251151                             | 0.054231723                               |
| 104.1222169                              | 195.4229755                                       | -0.488169436                            | 0.05272535                                |
| 82.20556213                              | 201.4525909                                       | 0.517362445                             | 0.055394058                               |
| 92.18389349                              | 196.2531586                                       | 0.356543183                             | 0.051158005                               |
| 31.33257499                              | 71.41852474                                       | 0.643136682                             | 0.1204244                                 |
| 48.63029798                              | 147.6813459                                       | 0.057309967                             | 0.068367503                               |
| 137.8864246                              | 263.7229729                                       | -0.21866682                             | 0.043112935                               |
| 94.96445892                              | 209.356638                                        | 0.314581051                             | 0.051340009                               |
| 67.67803753                              | 151.967205                                        | 0.479100054                             | 0.062134306                               |
| 81.6988983                               | 230.4364052                                       | 0.041306884                             | 0.051965728                               |
| 72.56827689                              | 190.2484913                                       | 0.00516093                              | 0.055428922                               |
| 44.48870002                              | 100.3364906                                       | 0.488812754                             | 0.094822677                               |
| 74.94787468                              | 180.0456924                                       | 0.225645017                             | 0.056031425                               |
| 98.11371467                              | 198.8995514                                       | 0.103458935                             | 0.048838053                               |
| 96.68830658                              | 191.6727543                                       | 0.200131106                             | 0.051605726                               |
| 93.95190177                              | 183.1286297                                       | 0.061588421                             | 0.05170654                                |
| 56.56186045                              | 163.5560989                                       | -0.027371592                            | 0.060330025                               |
| 89.47966796                              | 202.8261719                                       | 0.060595528                             | 0.049576267                               |
| 88.25654644                              | 199.9442286                                       | -0.45997657                             | 0.055133587                               |
| 80.16495647                              | 174.1363449                                       | 0.450056054                             | 0.056654919                               |
| 52.89280549                              | 139.8845015                                       | 0.450223679                             | 0.071604176                               |
| 74.01904343                              | 176.2936821                                       | -0.09182478                             | 0.056958232                               |
| 82.21408543                              | 213.194334                                        | -0.038498664                            | 0.054200542                               |
| 78.54279089                              | 167.7409477                                       | 0.233932897                             | 0.060049066                               |
| 100.5464396                              | 247.8709793                                       | 0.264270189                             | 0.048994375                               |
| 67.50462368                              | 196.2766075                                       | 0.279920124                             | 0.057480332                               |
| 63.70016901                              | 105.8401823                                       | 0.875712231                             | 0.083192118                               |
| 46.40390419                              | 138.8943529                                       | -0.118623031                            | 0.070794234                               |
| 69.37606562                              | 180.2644882                                       | -0.070671177                            | 0.057328543                               |
| 138.7058665                              | 221.2758312                                       | -0.705232311                            | 0.049966932                               |
| 83.46096758                              | 172.2426529                                       | -0.032263835                            | 0.055077275                               |
| 47.60603805                              | 125.5053363                                       | 0.425127175                             | 0.074958025                               |
| 110.5074805                              | 201.3831739                                       | 0.450153334                             | 0.047315002                               |
| 77.11196577                              | 184.8926888                                       | -0.251153417                            | 0.057868077                               |
| 74.52173282                              | 196.1673212                                       | 0.260175905                             | 0.057627387                               |
| 44.48786917                              | 130.0184898                                       | 0.305689712                             | 0.073484233                               |
| 67.50453758                              | 135.6025429                                       | 0.463574611                             | 0.067887088                               |
| 74.35641751                              | 141.110077                                        | -1.179208716                            | 0.088533521                               |
| 81.33208422                              | 186.9105949                                       | 0.14544136                              | 0.054425133                               |
| 58.72255769                              | 114.4343967                                       | 0.650664704                             | 0.081527182                               |
| 61.69624601                              | 144.6902542                                       | 0.043981328                             | 0.063209006                               |
| 87.38040591                              | 205.3089218                                       | 0.071096057                             | 0.052523989                               |
| 85.3321077                               | 161.6568451                                       | -0.142426221                            | 0.058064776                               |
| 51.03295653                              | 120.7845912                                       | 0.454459269                             | 0.07693186                                |
| 55.88984993                              | 150.7268639                                       | 0.293180602                             | 0.06571168                                |
| 70.18955323                              | 170.4798965                                       | 0.299526195                             | 0.0595024                                 |
| 45.3132134                               | 146.7041359                                       | 0.122435657                             | 0.070179181                               |
| 129.3074513                              | 256.3619976                                       | 0.042418231                             | 0.042473453                               |
| 86.31922208                              | 209.6989326                                       | 0.074669091                             | 0.051720272                               |
| 77.6269017                               | 176.4427299                                       | -0.618422811                            | 0.062336045                               |
| 59.54837676                              | 147.2707224                                       | -0.791779563                            | 0.079388505                               |
| 78.40628848                              | 173.4562454                                       | -0.007346899                            | 0.054635543                               |

| log.sigma.3.5.mm.3D_firstorder_MeanAbsoluteDeviation | log.sigma.3.5.mm.3D_firstorder_Energy | log.sigma.3.5.mm.3D_firstorder_RobustMeanAbsoluteDeviation | log.sigma.3.5.mm.3D_firstorder_Median |
|------------------------------------------------------|---------------------------------------|------------------------------------------------------------|---------------------------------------|
| 125.4746717                                          | 39179473.52                           | 86.82295725                                                | -60.0077877                           |
| 120.64181                                            | 8183359.429                           | 85.93973669                                                | -13.53582954                          |
| 125.26366                                            | 20122661.49                           | 93.76496437                                                | 4.562054634                           |
| 131.4058258                                          | 8788913.322                           | 93.25780542                                                | -22.98870564                          |
| 119.0478702                                          | 28525407.53                           | 90.02604067                                                | 10.74506187                           |
| 125.2549758                                          | 5570943.005                           | 91.73108562                                                | 26.62275505                           |
| 72.80352245                                          | 110080287.5                           | 43.80892411                                                | -5.636076927                          |
| 104.7382972                                          | 112347071.4                           | 72.01916443                                                | -32.57392311                          |
| 88.5105352                                           | 57638540.92                           | 59.81796113                                                | -27.86474991                          |
| 94.20558248                                          | 10361388.11                           | 68.74014299                                                | 18.45251846                           |
| 65.55627611                                          | 11363092.44                           | 44.06592074                                                | 5.602751255                           |
| 78.99812288                                          | 37968686.71                           | 50.6873692                                                 | -7.001959801                          |
| 130.2127779                                          | 19927208.27                           | 98.91456882                                                | 9.895960808                           |
| 133.0905589                                          | 20052798.87                           | 101.5658593                                                | -67.02474976                          |
| 106.2402219                                          | 32194515.44                           | 74.77440306                                                | -70.51444244                          |
| 96.30795749                                          | 89732966.86                           | 66.12280667                                                | -4.556544065                          |
| 76.99930529                                          | 7866338.61                            | 55.72247117                                                | -0.254358917                          |
| 128.4508609                                          | 12437518.58                           | 96.98060319                                                | -66.52571106                          |
| 65.27246959                                          | 7955842.418                           | 43.7731689                                                 | -21.03092384                          |
| 91.75041832                                          | 135590795.1                           | 60.70612229                                                | 14.79699039                           |
| 107.578442                                           | 33794666.29                           | 81.62305894                                                | 13.79689598                           |
| 107.0946163                                          | 8587794.478                           | 77.07706076                                                | -1.383321553                          |
| 101.1240198                                          | 8944618.706                           | 72.41718685                                                | -22.94885731                          |
| 60.77671448                                          | 25836086.03                           | 37.3193098                                                 | -12.43942261                          |
| 113.7749476                                          | 26126001.37                           | 81.88443233                                                | -33.80582619                          |
| 114.2405349                                          | 52461313.36                           | 79.36538029                                                | -24.91924572                          |
| 114.884277                                           | 43527390.31                           | 83.8457645                                                 | -65.11919403                          |
| 86.63138861                                          | 28683049.46                           | 61.30605772                                                | -35.76835632                          |
| 69.57488613                                          | 1391930.271                           | 47.68997154                                                | 32.8273983                            |
| 91.55251318                                          | 20868520.4                            | 66.38858984                                                | -15.48600149                          |
| 101.5093859                                          | 65185769.81                           | 73.99966803                                                | -44.24580765                          |
| 127.7187975                                          | 21959064.31                           | 98.9661797                                                 | -51.14849472                          |
| 98.91566335                                          | 37599440.9                            | 67.74811972                                                | -32.22949982                          |
| 94.41082132                                          | 34219571.72                           | 68.30757212                                                | -13.58131313                          |
| 96.725221                                            | 75816548.17                           | 67.96034667                                                | -25.47935104                          |
| 117.5133842                                          | 41079832.96                           | 86.01087858                                                | -15.41820908                          |
| 137.7873043                                          | 48456903.42                           | 99.58681307                                                | -34.02672195                          |
| 94.09912438                                          | 91796200.74                           | 62.50979487                                                | 1.867460489                           |
| 82.7884842                                           | 6465061.93                            | 59.98463447                                                | -24.56615162                          |
| 75.17083716                                          | 98653653.38                           | 48.11227027                                                | -11.08237553                          |
| 112.4460265                                          | 28208027.22                           | 84.47412613                                                | -68.24890137                          |
| 56.95611831                                          | 36379371.8                            | 34.03363155                                                | 0.495187491                           |
| 131.0084538                                          | 59569101.47                           | 97.71139426                                                | -5.142157555                          |
| 115.0955123                                          | 29055586.07                           | 85.69555677                                                | -40.8470993                           |
| 69.98092273                                          | 14879759.98                           | 42.15670922                                                | -7.897403717                          |
| 114.8201246                                          | 46429664.14                           | 84.37021259                                                | -18.64176178                          |
| 85.35224899                                          | 63005749.87                           | 59.25151559                                                | -9.31832695                           |
| 79.90263743                                          | 5211094.422                           | 57.55689833                                                | -14.36674023                          |
| 108.726687                                           | 7075966.653                           | 77.53600653                                                | 4.423104286                           |
| 118.6212236                                          | 9862140.481                           | 82.92090759                                                | 16.18105888                           |
| 113.1915552                                          | 26984865.56                           | 84.08791803                                                | -78.92079163                          |
| 112.9620524                                          | 56507881.73                           | 80.27299409                                                | 12.29921055                           |
| 55.44164097                                          | 50843989.19                           | 32.25619156                                                | -4.614058495                          |
| 84.42399178                                          | 18451933.22                           | 59.79778777                                                | -14.68018866                          |
| 141.2049217                                          | 18157489.81                           | 106.7372124                                                | 20.57526779                           |
| 117.3871686                                          | 23580714.94                           | 87.51724155                                                | -19.89853668                          |
| 93.40641257                                          | 56452587.46                           | 65.46017775                                                | -24.31816292                          |
| 117.1736157                                          | 40697455.64                           | 92.84129629                                                | -36.53765488                          |
| 104.9241058                                          | 14785418.68                           | 78.55658022                                                | -54.23906708                          |
| 68.34063161                                          | 99310966.3                            | 42.10321452                                                | -1.142561197                          |
| 102.3541793                                          | 21331385.3                            | 73.77556662                                                | -20.65362358                          |
| 115.8476735                                          | 52565576.01                           | 81.74439708                                                | 15.36587048                           |
| 112.2092508                                          | 161448481                             | 79.12143836                                                | -4.6504848                            |
| 109.5215246                                          | 39341075.3                            | 76.51901782                                                | 1.498742223                           |
| 93.3128551                                           | 9022838.752                           | 66.46736465                                                | -12.40772533                          |
| 114.9125722                                          | 68273641.13                           | 83.00000142                                                | -3.351587296                          |
| 113.6123855                                          | 10323680.09                           | 84.79554329                                                | -58.8134861                           |
| 103.5631697                                          | 88773115.47                           | 72.33369835                                                | -37.96728134                          |
| 81.87934832                                          | 78385118.21                           | 58.23709368                                                | -8.957266331                          |
| 100.4223893                                          | 32659194.8                            | 72.55233283                                                | 24.95919323                           |
| 114.6586434                                          | 9473587.906                           | 89.23288986                                                | -44.76767349                          |
| 102.1278198                                          | 84485766.98                           | 71.52871487                                                | -4.226017952                          |
| 126.3032666                                          | 31198960.06                           | 98.4578983                                                 | -53.58705902                          |
| 103.7526001                                          | 16299869.55                           | 78.31145793                                                | -54.3490696                           |
| 78.1616742                                           | 48777015.15                           | 47.78302076                                                | -13.25799179                          |
| 80.60435475                                          | 8831311.849                           | 59.05696352                                                | 9.363640308                           |
| 101.1663969                                          | 33375307.36                           | 74.17325829                                                | 2.533991575                           |
| 137.797676                                           | 10324265.15                           | 96.82653388                                                | -14.99584579                          |
| 102.9570731                                          | 23254087.41                           | 71.79606379                                                | 41.76436996                           |
| 76.8737897                                           | 20019852.4                            | 52.13796984                                                | -38.46079445                          |
| 123.5014562                                          | 37490229.66                           | 85.26115547                                                | -61.98815727                          |
| 103.9771009                                          | 13017737.88                           | 76.50309591                                                | 7.886797428                           |
| 104.9915501                                          | 39337490.32                           | 79.00750002                                                | -33.18221092                          |
| 77.50127919                                          | 21654667.95                           | 53.83458063                                                | -50.97580338                          |
| 88.50579608                                          | 36412628.01                           | 58.24183041                                                | -12.29813766                          |
| 97.75649269                                          | 8491783.217                           | 64.42778334                                                | 19.09057617                           |
| 105.8712298                                          | 23121578.94                           | 76.73900898                                                | -40.38877869                          |
| 80.25559584                                          | 46159609.87                           | 50.1853207                                                 | -7.28896451                           |
| 90.64638873                                          | 23074928.42                           | 62.17128532                                                | -22.6022644                           |
| 111.2219921                                          | 24575042.09                           | 82.47901121                                                | 9.925151825                           |
| 103.2749254                                          | 14190554.25                           | 69.90283746                                                | 19.71371269                           |
| 77.78216312                                          | 27527026.29                           | 51.19801282                                                | -21.49589443                          |
| 86.63187978                                          | 52110476.52                           | 62.44688446                                                | -14.50043488                          |
| 95.03499196                                          | 47999482.16                           | 68.30237574                                                | 6.569545507                           |
| 80.66148538                                          | 31391430.38                           | 59.65456117                                                | -6.637613773                          |
| 138.2968773                                          | 65331963.56                           | 104.2422393                                                | -6.253500462                          |
| 111.0131696                                          | 43163632.77                           | 83.76310449                                                | -0.760005832                          |
| 103.3125315                                          | 6772816.72                            | 74.22407459                                                | -52.26595688                          |
| 88.451206                                            | 3296224.445                           | 62.63753039                                                | 9.997353077                           |
| 103.8589258                                          | 153174811.5                           | 72.80149707                                                | 23.73817539                           |

| log.sigma.3.5.mm.3D_firstorder_TotalEnergy | log.sigma.3.5.mm.3D_firstorder_Maximum | log.sigma.3.5.mm.3D_firstorder_RootMeanSquared | log.sigma.3.5.mm.3D_firstorder_90Percentile | log.sigma.3.5.mm.3D_firstorder_Minimum |
|--------------------------------------------|----------------------------------------|------------------------------------------------|---------------------------------------------|----------------------------------------|
| 1057845785                                 | 478.9492188                            | 164.7197602                                    | 180.5228455                                 | -455.2085876                           |
| 220950704.6                                | 286.2527161                            | 153.5681229                                    | 130.927478                                  | -385.1043091                           |
| 543311860.3                                | 337.1661987                            | 150.1966629                                    | 180.7070007                                 | -369.1929016                           |
| 237300659.7                                | 302.447052                             | 165.2112644                                    | 173.5115067                                 | -392.6557007                           |
| 770186003.3                                | 401.1671448                            | 142.1845546                                    | 174.9210815                                 | -308.9163513                           |
| 150415461.1                                | 300.4783325                            | 151.7248353                                    | 212.5320297                                 | -351.7454834                           |
| 2972167762                                 | 598.3810425                            | 102.2009835                                    | 137.2709961                                 | -314.0350952                           |
| 3033370927                                 | 454.7615356                            | 136.08655                                      | 153.0633373                                 | -456.9634399                           |
| 1556240605                                 | 410.933197                             | 116.2919804                                    | 144.2520477                                 | -314.1509399                           |
| 279757479.1                                | 327.5464172                            | 117.1481663                                    | 179.1884521                                 | -260.4783325                           |
| 306803496                                  | 309.3952026                            | 85.45617965                                    | 132.2143021                                 | -203.5031586                           |
| 1025154541                                 | 483.5266113                            | 105.5666454                                    | 139.2333191                                 | -313.6583862                           |
| 538034623.2                                | 288.0982361                            | 156.7518961                                    | 143.2936249                                 | -433.4658203                           |
| 541425569.4                                | 344.69104                              | 176.4593053                                    | 118.4512138                                 | -441.75354                             |
| 869251916.9                                | 534.2099609                            | 142.971893                                     | 134.3757141                                 | -336.70224                             |
| 2422790105                                 | 429.1560364                            | 124.792759                                     | 188.5592163                                 | -272.7251587                           |
| 212391142.5                                | 241.356781                             | 94.38564905                                    | 124.6303085                                 | -220.8909099                           |
| 335813001.6                                | 348.0813293                            | 174.3834306                                    | 98.06470032                                 | -389.4121399                           |
| 214807745.3                                | 239.6832581                            | 85.27749316                                    | 87.81276016                                 | -215.940033                            |
| 3660951468                                 | 549.7582397                            | 121.5130191                                    | 167.0422394                                 | -417.0053711                           |
| 912455989.8                                | 339.4850769                            | 127.5267552                                    | 155.0522675                                 | -277.7923889                           |
| 231870450.9                                | 281.1105957                            | 131.5830603                                    | 146.4957047                                 | -314.3707886                           |
| 241504705                                  | 321.8539124                            | 126.6087778                                    | 133.1459564                                 | -325.882782                            |
| 697574322.8                                | 349.8340759                            | 84.75067036                                    | 93.85331879                                 | -247.2037659                           |
| 705402036.9                                | 375.5764771                            | 145.8603627                                    | 166.1622559                                 | -409.2463379                           |
| 1416455461                                 | 483.6218872                            | 143.2646868                                    | 218.2793655                                 | -495.8490601                           |
| 1175239538                                 | 478.8580322                            | 147.3779313                                    | 144.7646484                                 | -367.1344299                           |
| 774442335.4                                | 343.3305054                            | 112.8319425                                    | 109.7428772                                 | -286.6471252                           |
| 37582117.32                                | 288.5819702                            | 97.64102099                                    | 165.0195465                                 | -142.3574829                           |
| 563450050.8                                | 366.7657471                            | 113.8499623                                    | 127.7118263                                 | -298.9885864                           |
| 1760015785                                 | 395.290863                             | 127.5141473                                    | 148.0562225                                 | -311.480835                            |
| 592894736.5                                | 253.4428558                            | 166.9336182                                    | 106.7961182                                 | -451.5813599                           |
| 1015184904                                 | 491.6695557                            | 126.8958009                                    | 153.917334                                  | -311.2303467                           |
| 923928436.6                                | 406.10672                              | 119.0361076                                    | 157.1149841                                 | -328.2933655                           |
| 2047046801                                 | 466.6491089                            | 121.5336026                                    | 164.8025787                                 | -342.453949                            |
| 1109155490                                 | 349.6062317                            | 145.5544307                                    | 154.7889832                                 | -462.7019958                           |
| 1308336392                                 | 283.0792542                            | 179.0201568                                    | 141.6406418                                 | -597.7460327                           |
| 2478497420                                 | 467.5494995                            | 125.5779976                                    | 179.1620178                                 | -325.8493042                           |
| 174556672.1                                | 211.2290955                            | 107.4465144                                    | 83.09056244                                 | -312.011261                            |
| 2663648641                                 | 471.8371277                            | 102.1902893                                    | 117.3737946                                 | -574.1071167                           |
| 761616735                                  | 408.2597961                            | 145.0888231                                    | 126.3146217                                 | -375.3555298                           |
| 982243038.5                                | 477.2757568                            | 80.08653179                                    | 104.58825                                   | -282.8883362                           |
| 1608365740                                 | 393.5349731                            | 156.9576098                                    | 195.7942154                                 | -405.0612488                           |
| 784500823.8                                | 366.0162659                            | 143.0443299                                    | 149.0969574                                 | -339.5325928                           |
| 401753519.4                                | 404.5476685                            | 97.78971188                                    | 98.48695374                                 | -252.1848907                           |
| 1253600932                                 | 402.9790649                            | 139.059829                                     | 193.6208954                                 | -337.2556458                           |
| 1701155247                                 | 491.1434326                            | 108.5107129                                    | 131.3966217                                 | -359.3352051                           |
| 140699549.4                                | 238.9586487                            | 103.020517                                     | 75.91371155                                 | -299.0227356                           |
| 191051099.6                                | 388.5411377                            | 134.5254675                                    | 184.7622833                                 | -277.2364197                           |
| 266277793                                  | 310.5022888                            | 147.7122028                                    | 176.0394684                                 | -427.1882629                           |
| 728591370.2                                | 362.8755493                            | 144.8007649                                    | 145.0497711                                 | -343.0355835                           |
| 1525712807                                 | 548.1263428                            | 142.4432631                                    | 219.3212769                                 | -354.1603088                           |
| 1372787708                                 | 402.171875                             | 79.84123319                                    | 87.88396835                                 | -243.5806732                           |
| 498202196.8                                | 356.7323303                            | 106.0069552                                    | 117.6170288                                 | -432.2080688                           |
| 490252225                                  | 401.9849243                            | 168.0437707                                    | 166.3581635                                 | -373.0667114                           |
| 636679303.2                                | 417.1227112                            | 141.6037724                                    | 167.0930023                                 | -315.6006775                           |
| 1524219861                                 | 367.1705017                            | 118.5766431                                    | 149.3367859                                 | -342.5990906                           |
| 1098831302                                 | 367.8819275                            | 140.3180016                                    | 140.7239563                                 | -421.7946167                           |
| 399206304.3                                | 269.8624268                            | 139.204907                                     | 100.3258942                                 | -359.9692688                           |
| 2681396090                                 | 449.0080872                            | 95.48273535                                    | 113.660083                                  | -379.6986084                           |
| 575947403                                  | 385.7913208                            | 126.6913721                                    | 148.9638336                                 | -352.7173767                           |
| 1419270552                                 | 494.0980225                            | 146.0300561                                    | 205.6482178                                 | -405.8930664                           |
| 4359108987                                 | 551.0843506                            | 140.0269245                                    | 202.9634415                                 | -456.4082947                           |
| 1062209033                                 | 488.1392517                            | 137.0021788                                    | 180.7737885                                 | -374.4393921                           |
| 243616646.3                                | 322.5020447                            | 115.4455677                                    | 136.9207703                                 | -292.114502                            |
| 1843388311                                 | 473.5267639                            | 141.2700163                                    | 165.7745972                                 | -416.393158                            |
| 278739362.5                                | 167.6781769                            | 159.4609152                                    | 76.16137695                                 | -423.2909546                           |
| 2396874118                                 | 502.802063                             | 132.1281189                                    | 158.0211151                                 | -450.5843811                           |
| 2116398192                                 | 416.7040405                            | 102.1773599                                    | 128.6046448                                 | -304.9897461                           |
| 881798259.6                                | 375.2849121                            | 124.0010836                                    | 166.3768616                                 | -326.6332703                           |
| 255786873.5                                | 274.089447                             | 138.7633236                                    | 139.5519836                                 | -341.9475708                           |
| 2281115708                                 | 458.8828125                            | 130.2367364                                    | 166.1310577                                 | -416.3809509                           |
| 842371921.5                                | 389.6273499                            | 152.8725205                                    | 156.2921906                                 | -349.3070679                           |
| 440096477.9                                | 326.5084534                            | 130.9876232                                    | 124.5003326                                 | -308.1118164                           |
| 1316979409                                 | 533.3250732                            | 109.2860536                                    | 132.9674408                                 | -322.1991272                           |
| 238445419.9                                | 265.9413452                            | 98.08244192                                    | 129.0985794                                 | -271.2840881                           |
| 901133298.7                                | 417.7484436                            | 122.9178001                                    | 145.6171295                                 | -392.9076233                           |
| 278755159                                  | 242.0232849                            | 178.7838616                                    | 127.4484726                                 | -528.0695801                           |
| 627860360                                  | 413.2790833                            | 132.9801363                                    | 194.5044128                                 | -317.0590515                           |
| 540536014.8                                | 363.894928                             | 105.461558                                     | 89.00203476                                 | -348.5601196                           |
| 1012236201                                 | 478.9492188                            | 163.2925571                                    | 176.5491562                                 | -455.2085876                           |
| 351478922.9                                | 282.8000793                            | 125.538732                                     | 145.3611603                                 | -313.3320007                           |
| 1062112239                                 | 361.5075378                            | 131.2941889                                    | 135.7692474                                 | -315.9490967                           |
| 584676034.5                                | 302.3250427                            | 106.9548437                                    | 91.67058868                                 | -313.4918518                           |
| 983140956.3                                | 379.6047363                            | 115.8086757                                    | 156.9589783                                 | -300.7570496                           |
| 229278146.9                                | 201.9605408                            | 126.4597121                                    | 90.08052063                                 | -450.9888                              |
| 624282631.4                                | 318.3130493                            | 132.9550605                                    | 143.4336227                                 | -380.5328979                           |
| 1246309467                                 | 406.7005005                            | 109.696246                                     | 147.5197372                                 | -272.1052246                           |
| 623023067.4                                | 412.8624573                            | 116.4710591                                    | 140.8713837                                 | -365.361145                            |
| 663526136.4                                | 382.5666504                            | 134.0796532                                    | 168.2721924                                 | -338.131897                            |
| 383144964.9                                | 329.6266479                            | 132.8530884                                    | 203.6788788                                 | -420.6661072                           |
| 743229709.9                                | 352.7694397                            | 104.2672209                                    | 112.622789                                  | -305.7895813                           |
| 1406982866                                 | 491.3318176                            | 107.5989457                                    | 127.9878159                                 | -346.4553833                           |
| 1295986018                                 | 417.6781921                            | 118.0213667                                    | 170.5399704                                 | -276.1153564                           |
| 847568620.4                                | 294.2980347                            | 97.42904714                                    | 130.3340912                                 | -288.3412781                           |
| 1763963016                                 | 556.0657349                            | 165.542584                                     | 192.488942                                  | -468.3565063                           |
| 1165418085                                 | 368.8693542                            | 132.6779527                                    | 180.8722366                                 | -317.6687622                           |
| 182866051.4                                | 172.7457581                            | 147.0999391                                    | 68.73665771                                 | -468.6528015                           |
| 88998060.03                                | 190.6412506                            | 110.9024118                                    | 88.69646301                                 | -306.677124                            |
| 4135719910                                 | 456.0169373                            | 131.7531258                                    | 186.3066513                                 | -440.6280518                           |

| log.sigma.3.5.mm.3D_firstorder_Entropy | log.sigma.3.5.mm.3D_firstorder_StandardDeviation | log.sigma.3.5.mm.3D_firstorder_Range | log.sigma.3.5.mm.3D_firstorder_Variance | log.sigma.3.5.mm.3D_firstorder_10Percentile |
|----------------------------------------|--------------------------------------------------|--------------------------------------|-----------------------------------------|---------------------------------------------|
| 4.6551252                              | 158.3000419                                      | 934.1578064                          | 25058.90326                             | -238.0992386                                |
| 4.453859086                            | 148.153519                                       | 671.3570251                          | 21949.46519                             | -271.5598022                                |
| 4.55051011                             | 149.9585139                                      | 706.3591003                          | 22487.5559                              | -221.8980911                                |
| 4.60474596                             | 161.2611216                                      | 695.1027527                          | 26005.14935                             | -273.0986877                                |
| 4.454040313                            | 142.1815233                                      | 710.0834961                          | 20215.58557                             | -196.2773132                                |
| 4.539542413                            | 150.5067791                                      | 652.2238159                          | 22652.29056                             | -184.4327881                                |
| 3.911165347                            | 102.1255597                                      | 912.4161377                          | 10429.62993                             | -130.3139038                                |
| 4.408973844                            | 133.7141469                                      | 911.7249756                          | 17879.47307                             | -185.4424164                                |
| 4.13255737                             | 114.712039                                       | 725.084137                           | 13158.85189                             | -152.9130127                                |
| 4.200891676                            | 114.709562                                       | 588.0247498                          | 13158.2836                              | -119.718396                                 |
| 3.756457123                            | 84.15969721                                      | 512.8983612                          | 7082.854634                             | -89.24571228                                |
| 4.04664889                             | 105.5420756                                      | 797.1849976                          | 11139.12973                             | -136.1479279                                |
| 4.47388535                             | 153.9730092                                      | 721.5640564                          | 23707.68756                             | -264.0572815                                |
| 4.603295121                            | 157.4656903                                      | 786.4445801                          | 24795.44362                             | -300.1275421                                |
| 4.359854975                            | 133.1428524                                      | 870.9122009                          | 17727.01915                             | -206.2276764                                |
| 4.206379642                            | 124.7843017                                      | 701.8811951                          | 15571.12195                             | -166.7899734                                |
| 3.921451184                            | 94.38561437                                      | 462.2468719                          | 8908.6442                               | -130.6051849                                |
| 4.502202482                            | 153.6730038                                      | 737.4934692                          | 23615.39209                             | -304.4579956                                |
| 3.755085644                            | 83.37482762                                      | 455.623291                           | 6951.36188                              | -127.1474907                                |
| 4.285001378                            | 120.1770472                                      | 966.7636108                          | 14442.52267                             | -131.8779114                                |
| 4.304405203                            | 127.5249138                                      | 617.2774658                          | 16262.60365                             | -183.8853973                                |
| 4.314012436                            | 131.0523925                                      | 595.4813843                          | 17174.72957                             | -196.0966415                                |
| 4.297137854                            | 124.6539815                                      | 647.7366943                          | 15538.6151                              | -195.4046692                                |
| 3.682074616                            | 83.80183956                                      | 597.0378418                          | 7022.748313                             | -116.6463547                                |
| 4.45459588                             | 141.2591793                                      | 784.8228149                          | 19954.15572                             | -211.7654221                                |
| 4.463313172                            | 143.2233283                                      | 979.4709473                          | 20512.92176                             | -155.0773621                                |
| 4.466234273                            | 140.4651801                                      | 845.9924622                          | 19730.46681                             | -208.0010941                                |
| 4.116139277                            | 108.0449151                                      | 629.9776306                          | 11673.70368                             | -167.3166382                                |
| 3.71318596                             | 87.7867209                                       | 430.9394531                          | 7706.508367                             | -46.31147575                                |
| 4.191894575                            | 112.7922227                                      | 665.7543335                          | 12722.08551                             | -163.2628998                                |
| 4.29699008                             | 124.0246201                                      | 706.771698                           | 15382.1064                              | -181.5780792                                |
| 4.50847064                             | 149.4608076                                      | 705.0242157                          | 22338.533                               | -280.4617035                                |
| 4.320278623                            | 125.8343058                                      | 802.8999023                          | 15834.27252                             | -167.1699707                                |
| 4.178745868                            | 117.8510082                                      | 734.4000854                          | 13888.86014                             | -165.2143372                                |
| 4.258033292                            | 121.126335                                       | 809.1030579                          | 14671.58904                             | -151.7212097                                |
| 4.511718249                            | 143.687565                                       | 812.3082275                          | 20646.11632                             | -226.6606232                                |
| 4.689157924                            | 168.1980867                                      | 880.8252869                          | 28290.59637                             | -310.1014069                                |
| 4.150486696                            | 125.4778474                                      | 793.3988037                          | 15744.69018                             | -172.9008179                                |
| 4.004877701                            | 101.2320449                                      | 523.2403564                          | 10247.92691                             | -180.0242798                                |
| 3.993953474                            | 101.4453703                                      | 1045.944244                          | 10291.16316                             | -132.6994904                                |
| 4.401578457                            | 133.7379675                                      | 783.6153259                          | 17885.84395                             | -221.8031067                                |
| 3.619293927                            | 79.8972442                                       | 760.164093                           | 6383.569631                             | -84.73924866                                |
| 4.652020711                            | 156.9006225                                      | 798.5962219                          | 24617.80533                             | -206.7857193                                |
| 4.449323245                            | 138.6578944                                      | 705.5488586                          | 19226.01169                             | -210.7288101                                |
| 3.878170622                            | 97.50362975                                      | 656.7325592                          | 9506.957814                             | -135.2776413                                |
| 4.465193706                            | 139.0230162                                      | 740.2347107                          | 19327.39902                             | -176.0372314                                |
| 4.130851008                            | 108.2962633                                      | 850.4786377                          | 11728.08064                             | -141.1792908                                |
| 3.929477754                            | 98.00327068                                      | 537.9813843                          | 9604.641064                             | -173.7414398                                |
| 4.387550172                            | 134.4893545                                      | 665.7775574                          | 18087.38647                             | -175.0658112                                |
| 4.491611175                            | 147.527048                                       | 737.6905518                          | 21764.22989                             | -220.1022079                                |
| 4.369317119                            | 135.3065422                                      | 705.9111328                          | 18307.86035                             | -208.4527496                                |
| 4.501110075                            | 140.0751574                                      | 902.2866516                          | 19621.04971                             | -142.9418427                                |
| 3.551544026                            | 79.59415957                                      | 645.7525482                          | 6335.230237                             | -107.0962448                                |
| 4.095321896                            | 105.1654421                                      | 788.9403992                          | 11059.77022                             | -140.2487167                                |
| 4.655824905                            | 168.0423462                                      | 775.0516357                          | 28238.23011                             | -248.6116943                                |
| 4.438059969                            | 140.4750155                                      | 732.7233887                          | 19733.22999                             | -197.4549026                                |
| 4.221866511                            | 117.3575802                                      | 709.7695923                          | 13772.80163                             | -161.2349854                                |
| 4.377775908                            | 135.4882136                                      | 789.6765442                          | 18357.05603                             | -212.1366333                                |
| 4.316115292                            | 124.9188183                                      | 629.8316956                          | 15604.71117                             | -230.1849823                                |
| 3.863056933                            | 95.42364578                                      | 828.7066956                          | 9105.672175                             | -119.7415802                                |
| 4.342511289                            | 126.0808536                                      | 738.5086975                          | 15896.38163                             | -177.2061279                                |
| 4.556115082                            | 145.0948164                                      | 899.9910889                          | 21052.50576                             | -181.9519562                                |
| 4.500718744                            | 139.5537804                                      | 1007.492645                          | 19475.25763                             | -161.88564                                  |
| 4.489004397                            | 137.0008195                                      | 862.5786438                          | 18769.22456                             | -176.543251                                 |
| 4.215425328                            | 114.9502987                                      | 614.6165466                          | 13213.57118                             | -165.4391724                                |
| 4.524133468                            | 141.0338349                                      | 889.9199219                          | 19890.5426                              | -193.6062622                                |
| 4.335737269                            | 135.4130313                                      | 590.9691315                          | 18336.68903                             | -282.6182556                                |
| 4.389513918                            | 130.1332277                                      | 953.3864441                          | 16934.65696                             | -172.5038666                                |
| 4.033122492                            | 101.9635522                                      | 721.6937866                          | 10396.56598                             | -129.0561691                                |
| 4.310614183                            | 122.7233488                                      | 701.9181824                          | 15061.02033                             | -155.9576889                                |
| 4.329127115                            | 133.5815927                                      | 616.0370178                          | 17844.04191                             | -218.6343109                                |
| 4.339217234                            | 129.8200692                                      | 875.2637634                          | 16853.25036                             | -185.3972626                                |
| 4.487489396                            | 147.2066539                                      | 738.9344177                          | 21669.79896                             | -223.7404755                                |
| 4.27633977                             | 123.4618261                                      | 634.6202698                          | 15242.82252                             | -195.6143799                                |
| 4.025346014                            | 108.9452142                                      | 855.5242004                          | 11869.0597                              | -131.6092224                                |
| 3.983007441                            | 97.94997299                                      | 537.2254333                          | 9594.197209                             | -129.4824097                                |
| 4.31026899                             | 122.8994252                                      | 810.6560669                          | 15104.26872                             | -169.2636841                                |
| 4.594254422                            | 168.0688986                                      | 770.092865                           | 28247.15466                             | -306.8365906                                |
| 4.393145156                            | 128.5742399                                      | 730.3381348                          | 16531.33517                             | -139.746048                                 |
| 4.003905934                            | 99.13345795                                      | 712.4550476                          | 9827.442485                             | -156.0386276                                |
| 4.629269899                            | 156.2001451                                      | 934.1578064                          | 24398.48531                             | -237.7975464                                |
| 4.289576361                            | 125.1613452                                      | 596.1320801                          | 15665.36234                             | -188.3417435                                |
| 4.295839649                            | 126.3813283                                      | 677.4566345                          | 15972.24014                             | -198.0273087                                |
| 3.982490995                            | 97.52293539                                      | 615.8168945                          | 9510.722927                             | -165.1279327                                |
| 4.1883175                              | 115.7506242                                      | 680.3617859                          | 13398.207                               | -149.7940704                                |
| 3.966623199                            | 124.4008855                                      | 652.9493408                          | 15475.58031                             | -223.306568                                 |
| 4.379397431                            | 128.8285738                                      | 698.8459473                          | 16596.80144                             | -190.3100418                                |
| 4.031985858                            | 109.6510037                                      | 678.8057251                          | 12023.34262                             | -143.8689041                                |
| 4.229561206                            | 115.0934642                                      | 778.2236023                          | 13246.50551                             | -165.7891693                                |
| 4.40875344                             | 134.0695985                                      | 720.6985474                          | 17974.65724                             | -180.8423431                                |
| 4.364166299                            | 132.0351651                                      | 750.2927551                          | 17433.28483                             | -135.2093781                                |
| 4.009611104                            | 102.2319546                                      | 658.559021                           | 10451.37253                             | -147.157074                                 |
| 4.124111844                            | 107.122653                                       | 837.7872009                          | 11475.26278                             | -143.0514069                                |
| 4.243988106                            | 117.3202786                                      | 693.7935486                          | 13764.04777                             | -139.591629                                 |
| 3.98165964                             | 97.36830107                                      | 582.6393127                          | 9480.586053                             | -127.9806503                                |
| 4.716077349                            | 164.9183627                                      | 1024.422241                          | 27198.06635                             | -230.6488144                                |
| 4.402637049                            | 132.5501074                                      | 686.5381165                          | 17569.53097                             | -167.7004272                                |
| 4.231632755                            | 125.6795901                                      | 641.3985596                          | 15795.35937                             | -254.789798                                 |
| 3.937496224                            | 109.1536682                                      | 497.3183746                          | 11914.52329                             | -184.2300461                                |
| 4.412594768                            | 130.4699085                                      | 896.644989                           | 17022.39702                             | -159.6999893                                |

| log.sigma.3.5.mm.3D_firstorder_Kurtosis | log.sigma.3.5.mm.3D_firstorder_Mean | log.sigma.3.5.mm.3D_glrIm_ShortRunLowGrayLevelEmphasis | log.sigma.3.5.mm.3D_glrIm_GrayLevelVariance |
|-----------------------------------------|-------------------------------------|--------------------------------------------------------|---------------------------------------------|
| 2.882167092                             | -45.53785383                        | 0.006034963                                            | 40.90967321                                 |
| 2.489530141                             | -40.41909434                        | 0.016202626                                            | 35.18178912                                 |
| 2.2131296                               | -8.454681789                        | 0.013460657                                            | 36.08196454                                 |
| 2.451235794                             | -35.91117535                        | 0.026176162                                            | 41.79932411                                 |
| 2.262319909                             | -0.928441118                        | 0.012846261                                            | 32.14000446                                 |
| 2.393357674                             | 19.18684639                         | 0.013963669                                            | 36.30298096                                 |
| 4.518561424                             | -3.925697683                        | 0.007621314                                            | 19.02093987                                 |
| 3.306675276                             | -25.20328931                        | 0.003764328                                            | 29.80876323                                 |
| 3.475565419                             | -19.10426197                        | 0.009019901                                            | 22.42451101                                 |
| 2.425129014                             | 23.77833601                         | 0.015124591                                            | 21.37167842                                 |
| 3.124880059                             | 14.82916065                         | 0.015474499                                            | 11.87759947                                 |
| 3.799590212                             | -2.277472845                        | 0.007778085                                            | 19.09899341                                 |
| 2.243932429                             | -29.38484923                        | 0.009547443                                            | 38.24738826                                 |
| 2.162095329                             | -79.63945516                        | 0.011972063                                            | 39.30100091                                 |
| 3.346336324                             | -52.09551834                        | 0.01235356                                             | 29.20309936                                 |
| 2.655801802                             | 1.452843362                         | 0.020497179                                            | 26.58442562                                 |
| 2.446404739                             | 0.080911451                         | 0.023619238                                            | 14.50823902                                 |
| 2.305511197                             | -82.42686928                        | 0.027672032                                            | 37.16978061                                 |
| 3.102662847                             | -17.91337375                        | 0.029409178                                            | 11.69867366                                 |
| 3.798162316                             | 17.96917212                         | 0.004009506                                            | 24.39928384                                 |
| 2.200698655                             | -0.685300818                        | 0.014049134                                            | 25.97537488                                 |
| 2.391536325                             | -11.80560023                        | 0.016843008                                            | 27.46364277                                 |
| 2.612250514                             | -22.16229969                        | 0.011634971                                            | 25.20659417                                 |
| 4.184614888                             | -12.6462569                         | 0.016962102                                            | 12.34365621                                 |
| 2.503258739                             | -36.34679751                        | 0.007804475                                            | 33.88193198                                 |
| 3.117301487                             | 3.442197716                         | 0.003553191                                            | 33.76211672                                 |
| 2.990261353                             | -44.60703795                        | 0.010904125                                            | 32.30433345                                 |
| 2.958075652                             | -32.51681988                        | 0.015876068                                            | 19.21821348                                 |
| 3.045861387                             | 42.74646901                         | 0.039465086                                            | 12.78170676                                 |
| 2.759818126                             | -15.48316526                        | 0.015188137                                            | 20.64425387                                 |
| 2.628750975                             | -29.62686912                        | 0.011577564                                            | 25.21042966                                 |
| 2.107729412                             | -74.35253787                        | 0.0088746                                              | 35.87254011                                 |
| 3.288225947                             | -16.37900364                        | 0.011796883                                            | 26.38229143                                 |
| 2.63592326                              | -16.7551418                         | 0.007972839                                            | 23.00589204                                 |
| 2.981245231                             | -9.941202876                        | 0.007497144                                            | 24.48802316                                 |
| 2.49171244                              | -23.23738298                        | 0.005325124                                            | 33.57257161                                 |
| 2.55678581                              | -61.2994305                         | 0.004048682                                            | 45.35076694                                 |
| 3.001978879                             | -5.014310197                        | 0.007879939                                            | 27.98866671                                 |
| 2.522829605                             | -36.01147781                        | 0.015788927                                            | 16.63949877                                 |
| 4.335891951                             | -12.31633341                        | 0.00200603                                             | 17.8600693                                  |
| 2.447527197                             | -56.25764514                        | 0.009096652                                            | 28.71645202                                 |
| 5.244203255                             | 5.50293935                          | 0.00751937                                             | 11.31772056                                 |
| 2.356929833                             | -4.229175959                        | 0.006726543                                            | 39.15384462                                 |
| 2.455177191                             | -35.15207875                        | 0.013364422                                            | 30.92177661                                 |
| 4.475735405                             | -7.474619491                        | 0.014639268                                            | 16.77437509                                 |
| 2.444821665                             | -3.19953413                         | 0.008626402                                            | 31.19822296                                 |
| 3.502866629                             | -6.818664371                        | 0.005502115                                            | 19.5768288                                  |
| 2.641030758                             | -31.75824088                        | 0.017687632                                            | 15.58115219                                 |
| 2.63581386                              | 3.116880133                         | 0.016339054                                            | 29.28714234                                 |
| 2.787654316                             | -7.393576691                        | 0.008382181                                            | 35.4455978                                  |
| 2.489589492                             | -51.56938196                        | 0.014577204                                            | 29.6774309                                  |
| 2.987599998                             | 25.86568189                         | 0.006586678                                            | 31.76806319                                 |
| 5.245232083                             | -6.276326911                        | 0.014389669                                            | 11.8078462                                  |
| 3.317653296                             | -13.33057897                        | 0.004325822                                            | 18.22302023                                 |
| 2.11076286                              | -0.691938892                        | 0.018447869                                            | 45.26318053                                 |
| 2.468280679                             | -17.84372036                        | 0.013692228                                            | 31.69225039                                 |
| 2.886269846                             | -16.95932375                        | 0.007532484                                            | 22.92716073                                 |
| 2.002873784                             | -36.49774719                        | 0.006217031                                            | 29.42865723                                 |
| 2.310084648                             | -61.42715171                        | 0.012530482                                            | 24.97568156                                 |
| 4.584739205                             | -3.358656678                        | 0.004235083                                            | 16.61510561                                 |
| 2.707165297                             | -12.42264563                        | 0.00758328                                             | 25.98861476                                 |
| 2.717752788                             | 16.50065229                         | 0.005041009                                            | 34.3690605                                  |
| 2.762345353                             | 11.50138976                         | 0.003339283                                            | 32.18322357                                 |
| 2.867899331                             | 0.610276244                         | 0.00979142                                             | 30.34006468                                 |
| 2.540359028                             | -10.68213111                        | 0.019440509                                            | 21.65510772                                 |
| 2.782193992                             | -8.165471313                        | 0.006304382                                            | 32.10666602                                 |
| 3.322816808                             | -84.20863642                        | 0.020173927                                            | 29.56678494                                 |
| 3.220736044                             | -22.87319085                        | 0.003871554                                            | 27.76192795                                 |
| 3.22465365                              | -6.606579416                        | 0.007699634                                            | 17.21998402                                 |
| 2.521251211                             | 17.75523597                         | 0.007209998                                            | 24.51272195                                 |
| 2.008662101                             | -37.56618237                        | 0.014933521                                            | 28.39705195                                 |
| 2.845399927                             | -10.40947369                        | 0.004774015                                            | 28.01654981                                 |
| 2.160882144                             | -41.23358556                        | 0.016203442                                            | 34.89554821                                 |
| 2.327255792                             | -43.75996924                        | 0.016961742                                            | 24.75087788                                 |
| 4.89710548                              | -8.624489337                        | 0.009144351                                            | 20.57613756                                 |
| 2.46073443                              | 5.09590061                          | 0.014028829                                            | 15.50098487                                 |
| 2.676513085                             | -2.125291715                        | 0.006604019                                            | 24.4033974                                  |
| 2.836721151                             | -60.9632227                         | 0.009667687                                            | 45.50712195                                 |
| 2.786159307                             | 33.94674495                         | 0.009933231                                            | 27.07497618                                 |
| 3.74058142                              | -35.98190847                        | 0.009241929                                            | 16.60875003                                 |
| 2.922617461                             | -47.60224684                        | 0.005814023                                            | 39.85176733                                 |
| 2.357028457                             | -9.726812791                        | 0.01634415                                             | 25.24434804                                 |
| 2.444336303                             | -35.57982417                        | 0.015327919                                            | 26.53139049                                 |
| 2.885299148                             | -43.91600688                        | 0.010896354                                            | 15.57755237                                 |
| 3.198420218                             | -3.666382194                        | 0.008850418                                            | 22.69666061                                 |
| 3.715642134                             | -22.72616298                        | 0.006918155                                            | 25.40119464                                 |
| 2.538366888                             | -32.8671064                         | 0.00769167                                             | 26.84943911                                 |
| 3.764816586                             | -3.150201174                        | 0.013394893                                            | 21.27653614                                 |
| 3.02216748                              | -17.86062946                        | 0.009014119                                            | 22.1814                                     |
| 2.390948349                             | 1.641997679                         | 0.008781605                                            | 28.94705052                                 |
| 3.093046469                             | 14.71931623                         | 0.00628019                                             | 28.52323084                                 |
| 3.54403031                              | -20.5007517                         | 0.009221562                                            | 17.67882997                                 |
| 3.151202161                             | -10.11287945                        | 0.007178797                                            | 18.73624608                                 |
| 2.74004974                              | 12.84504653                         | 0.009925092                                            | 22.49425157                                 |
| 2.40489344                              | -3.439938085                        | 0.009337851                                            | 15.43417705                                 |
| 2.420117917                             | -14.36247819                        | 0.00551493                                             | 43.64065793                                 |
| 2.285266669                             | 5.823071846                         | 0.011579127                                            | 28.3999757                                  |
| 2.905794828                             | -76.43973253                        | 0.009899764                                            | 25.68609539                                 |
[truncated: 7,295,610 more chars]
