# Supplementary material for: Peritumoral radiomics features predict distant metastasis in locally advanced NSCLC
Source: PLoS One. 2018 Nov 2;13(11):e0206108. doi: 10.1371/journal.pone.0206108 (PMC6214508; doi:10.1371/journal.pone.0206108)
Supplement: S9 File — (PDF) [file pone.0206108.s009.pdf]

X general\_info\_BoundingBox

1 (6, 6, 5, 15, 16, 17)  
2 (6, 5, 6, 19, 25, 21)  
3 (6, 5, 5, 12, 17, 11)  
4 (6, 6, 5, 18, 23, 25)  
5 (6, 6, 6, 13, 13, 11)  
6 (6, 6, 6, 15, 15, 13)  
8 (5, 6, 6, 16, 14, 9)  
9 (6, 6, 6, 19, 18, 15)  
10 (6, 6, 6, 23, 22, 19)  
11 (5, 6, 6, 25, 22, 28)  
12 (5, 6, 5, 15, 17, 14)  
13 (6, 5, 6, 17, 20, 23)  
14 (6, 5, 6, 23, 22, 20)  
15 (5, 5, 6, 18, 20, 16)  
16 (5, 6, 6, 19, 16, 17)  
17 (6, 6, 6, 32, 26, 40)  
18 (6, 6, 6, 18, 13, 14)  
19 (6, 6, 5, 25, 20, 25)  
20 (6, 6, 6, 13, 15, 15)  
21 (6, 5, 6, 25, 28, 28)  
22 (6, 6, 6, 28, 28, 38)  
23 (6, 6, 6, 19, 14, 25)  
24 (5, 5, 6, 24, 32, 35)  
25 (5, 6, 6, 15, 13, 13)  
26 (6, 6, 5, 21, 26, 20)  
27 (6, 6, 6, 18, 22, 14)  
29 (6, 6, 5, 22, 31, 24)  
30 (5, 5, 6, 20, 36, 34)  
31 (5, 5, 5, 17, 29, 32)  
32 (6, 6, 6, 22, 24, 24)  
33 (5, 6, 6, 19, 32, 31)  
34 (6, 6, 6, 37, 34, 36)  
35 (6, 5, 6, 19, 21, 22)  
36 (6, 5, 6, 9, 9, 9)  
37 (6, 6, 5, 12, 13, 14)  
38 (6, 6, 6, 22, 21, 19)  
39 (5, 5, 6, 26, 36, 34)  
40 (5, 6, 6, 26, 29, 22)  
41 (6, 6, 5, 15, 18, 14)  
42 (6, 5, 6, 17, 17, 17)  
43 (6, 5, 6, 12, 23, 20)  
44 (6, 6, 6, 20, 17, 16)  
45 (5, 6, 6, 29, 18, 18)  
46 (5, 5, 6, 18, 18, 19)  
48 (5, 6, 5, 24, 21, 18)  
49 (7, 6, 4, 26, 38, 30)  
50 (6, 5, 0, 24, 22, 31)  
51 (6, 5, 5, 14, 14, 13)  
52 (6, 6, 5, 9, 10, 10)  
53 (6, 5, 6, 12, 16, 13)  
54 (6, 6, 5, 30, 29, 29)  
55 (5, 5, 6, 16, 16, 15)  
56 (6, 6, 6, 22, 26, 34)  
57 (6, 6, 5, 15, 15, 15)  
58 (6, 6, 6, 29, 42, 36)  
59 (6, 6, 5, 16, 17, 15)  
60 (6, 6, 6, 27, 24, 25)  
61 (6, 6, 5, 21, 17, 19)  
62 (6, 6, 5, 16, 17, 16)  
63 (6, 6, 6, 20, 13, 13)  
64 (6, 5, 5, 21, 23, 20)  
65 (5, 6, 6, 26, 31, 37)  
66 (5, 6, 5, 24, 23, 38)  
67 (5, 6, 6, 26, 30, 23)  
68 (6, 6, 6, 12, 11, 10)  
69 (5, 5, 5, 26, 20, 17)  
70 (6, 6, 6, 14, 12, 12)  
71 (6, 6, 6, 27, 25, 25)  
72 (6, 6, 6, 14, 13, 13)  
73 (6, 6, 6, 20, 26, 24)  
74 (6, 6, 5, 27, 29, 26)  
75 (5, 6, 6, 18, 18, 16)  
76 (6, 6, 6, 27, 35, 33)  
77 (7, 5, 6, 35, 43, 41)  
78 (6, 6, 5, 35, 43, 26)  
79 (5, 6, 6, 19, 21, 16)  
80 (6, 6, 6, 19, 21, 14)  
81 (6, 5, 6, 14, 14, 15)  
82 (6, 5, 5, 25, 23, 16)  
83 (5, 5, 5, 22, 33, 26)  
84 (6, 6, 6, 16, 15, 10)  
85 (6, 6, 6, 22, 27, 15)  
86 (5, 6, 5, 18, 28, 28)  
87 (6, 5, 6, 10, 11, 9)  
88 (6, 5, 6, 26, 31, 30)  
89 (6, 6, 6, 33, 27, 26)  
90 (6, 6, 6, 16, 15, 15)  
91 (5, 6, 6, 20, 30, 17)  
92 (6, 6, 6, 10, 13, 9)  
93 (6, 6, 6, 11, 10, 7)  
94 (6, 6, 5, 27, 35, 25)  
95 (6, 6, 6, 15, 16, 18)  
96 (6, 5, 6, 16, 21, 15)  
107 (6, 6, 6, 28, 24, 27)  
108 (5, 6, 5, 30, 32, 32)  
112 (6, 6, 6, 11, 11, 11)  
114 (6, 6, 6, 20, 16, 17)  
126 (6, 6, 5, 9, 10, 9)  
135 (6, 6, 6, 13, 13, 11)  
139 (6, 5, 5, 13, 19, 16)





| general_info_VoxelNum | original_shape_Maximum3DDiameter | original_shape_Compactness2 | original_shape_Maximum2DDiameterSlice | original_shape_Sphericity | original_shape_Compactness1 | original_shape_Elongation |
|-----------------------|----------------------------------|-----------------------------|---------------------------------------|---------------------------|-----------------------------|---------------------------|
| 1203                  | 56.36488268                      | 0.114244269                 | 48.46648326                           | 0.485226831               | 0.017931478                 | 1.119311266               |
| 2000                  | 79.65550828                      | 0.073445473                 | 77.82673063                           | 0.418782325               | 0.014377434                 | 1.451876183               |
| 1118                  | 59.01694672                      | 0.10798821                  | 55.07267925                           | 0.476202986               | 0.017433599                 | 1.365876018               |
| 2453                  | 87.82368701                      | 0.054725634                 | 70.80254233                           | 0.379661827               | 0.012410643                 | 1.195226281               |
| 949                   | 51.35172831                      | 0.133646433                 | 45                                    | 0.511272527               | 0.019394454                 | 1.187674799               |
| 1638                  | 56.92099788                      | 0.111813158                 | 49.92995093                           | 0.481760259               | 0.017739662                 | 1.017220325               |
| 1057                  | 62.42595614                      | 0.125164961                 | 57.62811814                           | 0.500219851               | 0.018768962                 | 1.637885747               |
| 1805                  | 67.08203932                      | 0.078051653                 | 61.77378085                           | 0.427360161               | 0.014821424                 | 1.174373826               |
| 2027                  | 78.2879301                       | 0.053325869                 | 67.68308504                           | 0.376396849               | 0.012250896                 | 1.228987343               |
| 3003                  | 101.9117265                      | 0.041904284                 | 71.30918594                           | 0.347338408               | 0.010859957                 | 1.555484733               |
| 1807                  | 67.94850992                      | 0.085432418                 | 58.24946352                           | 0.440427302               | 0.015506373                 | 1.184888204               |
| 1685                  | 84.26743143                      | 0.079608261                 | 64.41273166                           | 0.430182474               | 0.014968488                 | 1.191996789               |
| 2929                  | 80.27452896                      | 0.050003275                 | 67.68308504                           | 0.368411194               | 0.011863098                 | 1.044547667               |
| 1858                  | 66.13622306                      | 0.082082964                 | 60.74537019                           | 0.434594617               | 0.015199363                 | 1.167848869               |
| 1548                  | 71.8748913                       | 0.07680865                  | 61.77378085                           | 0.425079385               | 0.014702932                 | 1.3461619                 |
| 4109                  | 141.5733026                      | 0.029608975                 | 87                                    | 0.309367337               | 0.009128734                 | 1.771549852               |
| 1605                  | 66.47555942                      | 0.100263706                 | 58.24946352                           | 0.46456653                | 0.01679851                  | 1.150836472               |
| 2558                  | 97.71898485                      | 0.05486686                  | 86.53323061                           | 0.379988133               | 0.012426646                 | 1.124318122               |
| 1136                  | 62.92853089                      | 0.094590293                 | 51.6139516                            | 0.45563337                | 0.016316318                 | 1.19018416                |
| 2901                  | 102.7472627                      | 0.054765285                 | 74.09453421                           | 0.379753498               | 0.012415138                 | 1.40702559                |
| 6950                  | 125.0679815                      | 0.02703392                  | 89.19641248                           | 0.300125576               | 0.008722749                 | 1.387927897               |
| 2121                  | 89.09545443                      | 0.062962136                 | 59.09314681                           | 0.39782599                | 0.013311856                 | 1.400631502               |
| 4121                  | 115.2562363                      | 0.032485081                 | 97.9489663                            | 0.319076376               | 0.009561826                 | 1.260347156               |
| 1030                  | 61.26173357                      | 0.124753703                 | 51.6139516                            | 0.499671387               | 0.018738102                 | 1.123991834               |
| 2604                  | 89.49860334                      | 0.057313389                 | 83.19254774                           | 0.385554132               | 0.012700678                 | 1.459179277               |
| 1352                  | 72.56031973                      | 0.091143049                 | 69.0651866                            | 0.450029708               | 0.016016243                 | 1.542104414               |
| 2211                  | 98.81801455                      | 0.018026754                 | 98.08669635                           | 0.262203917               | 0.007122913                 | 1.213843318               |
| 3355                  | 126.9251748                      | 0.034256791                 | 112.0089282                           | 0.324774726               | 0.009819112                 | 1.386344059               |
| 3399                  | 106.573918                       | 0.047964877                 | 87.46427842                           | 0.363335455               | 0.01161878                  | 1.05974054                |
| 3159                  | 88.43641784                      | 0.034419638                 | 73.23933369                           | 0.325288544               | 0.009842423                 | 1.102019733               |
| 4142                  | 124.1652125                      | 0.036879647                 | 88.84255737                           | 0.332860492               | 0.010188078                 | 1.493036397               |
| 5000                  | 141.0638153                      | 0.022410372                 | 104.9571341                           | 0.281935451               | 0.007941882                 | 1.300690992               |
| 2531                  | 79.7684148                       | 0.067339453                 | 68.41052551                           | 0.406839577               | 0.013766821                 | 1.077064044               |
| 481                   | 38.41874542                      | 0.225839066                 | 31.89043744                           | 0.608975316               | 0.025211484                 | 1.10070798                |
| 888                   | 58.94064811                      | 0.133508763                 | 41.67733197                           | 0.511096913               | 0.019384463                 | 1.253933422               |
| 3217                  | 81.49846624                      | 0.052992807                 | 70.80254233                           | 0.375611582               | 0.012212578                 | 1.119809205               |
| 3569                  | 121.1197754                      | 0.045297785                 | 105.5130324                           | 0.35647219                | 0.011291129                 | 1.479956638               |
| 3391                  | 102.7472627                      | 0.050767975                 | 92.61209424                           | 0.370279738               | 0.011953465                 | 1.050724961               |
| 1484                  | 60.44832504                      | 0.091858429                 | 56.36488268                           | 0.451204065               | 0.016078976                 | 1.239480385               |
| 1636                  | 64.20280368                      | 0.097689015                 | 58.24946352                           | 0.460555434               | 0.016581421                 | 1.001990304               |
| 1316                  | 68.73863542                      | 0.096378466                 | 66.61080993                           | 0.458486624               | 0.016469821                 | 1.158462933               |
| 1932                  | 67.74953874                      | 0.077588065                 | 63.07138812                           | 0.426512379               | 0.014777342                 | 1.06662025                |
| 3027                  | 87.20665112                      | 0.057382361                 | 84.85281374                           | 0.385708732               | 0.012708318                 | 1.367294743               |
| 1884                  | 76.13146524                      | 0.076473692                 | 55.07267925                           | 0.424460569               | 0.014670837                 | 1.284046543               |
| 3494                  | 85.1704174                       | 0.057857018                 | 72.49827584                           | 0.386769319               | 0.012760771                 | 1.110252568               |
| 3575                  | 137.5099996                      | 0.042323194                 | 118.6802427                           | 0.348492                  | 0.010914104                 | 1.38467322                |
| 3686                  | 102.9660138                      | 0.036879112                 | 76.4852927                            | 0.332858883               | 0.010188004                 | 1.333481365               |
| 1516                  | 57.31491952                      | 0.117233999                 | 51.0881591                            | 0.489423171               | 0.018164593                 | 1.034230864               |
| 564                   | 40.36087214                      | 0.20505767                  | 34.20526275                           | 0.58969214                | 0.024023533                 | 1.054183838               |
| 1090                  | 52.82045058                      | 0.121375117                 | 49.65883607                           | 0.495119336               | 0.018482627                 | 1.149954351               |
| 3984                  | 106.8690788                      | 0.037444956                 | 90.24965374                           | 0.334552625               | 0.010265865                 | 1.331684622               |
| 1956                  | 62.92853089                      | 0.099808584                 | 51.6139516                            | 0.463862536               | 0.01676034                  | 1.058157693               |
| 3797                  | 100.0096149                      | 0.039800877                 | 81.9390017                            | 0.341426754               | 0.010583887                 | 1.306934722               |
| 1171                  | 56.44466317                      | 0.111899112                 | 51.6139516                            | 0.481883674               | 0.017746479                 | 1.051262662               |
| 3937                  | 159.3674998                      | 0.03890104                  | 128.1600562                           | 0.338834069               | 0.01046356                  | 1.224135405               |
| 1888                  | 64.96922348                      | 0.084362572                 | 56.60388679                           | 0.438581125               | 0.015408976                 | 1.116471538               |
| 3279                  | 121.2682976                      | 0.041803698                 | 89.19641248                           | 0.347060272               | 0.010846915                 | 1.498912357               |
| 2432                  | 83.89278872                      | 0.067624665                 | 68.01470429                           | 0.407413151               | 0.013795945                 | 1.337235515               |
| 1372                  | 64.41273166                      | 0.099637141                 | 58.24946352                           | 0.463596789               | 0.016745939                 | 1.125562495               |
| 1405                  | 63.63961031                      | 0.108068978                 | 59.94064811                           | 0.476321679               | 0.017440117                 | 1.352938049               |
| 2941                  | 77.59510294                      | 0.047894066                 | 69.26037828                           | 0.363156567               | 0.011610201                 | 1.090908909               |
| 5487                  | 122.1556384                      | 0.029676927                 | 90.44888059                           | 0.30960382                | 0.009139203                 | 1.384528949               |
| 2271                  | 129.3483668                      | 0.059831234                 | 76.4852927                            | 0.391119366               | 0.012976658                 | 1.333525748               |
| 1868                  | 88.27003612                      | 0.070547952                 | 90.24965374                           | 0.4132011                 | 0.014090976                 | 1.767038979               |
| 590                   | 44.39594576                      | 0.191565791                 | 40.36087214                           | 0.576464612               | 0.023219767                 | 1.050276549               |
| 1543                  | 87.25823743                      | 0.085616811                 | 70.22819946                           | 0.440743939               | 0.015523098                 | 1.407042732               |
| 1058                  | 51.35172831                      | 0.123743851                 | 47.4341649                            | 0.498319493               | 0.018662108                 | 1.1681128                 |
| 3566                  | 95.1052049                       | 0.045948757                 | 87.6184912                            | 0.358171689               | 0.011371971                 | 1.149888588               |
| 1293                  | 52.13444159                      | 0.139972555                 | 45                                    | 0.519215478               | 0.019848163                 | 1.056512683               |
| 2507                  | 81.44323176                      | 0.060638832                 | 77.88452991                           | 0.393302725               | 0.01308547                  | 1.098999426               |
| 3808                  | 106.0660172                      | 0.035871572                 | 84.53401682                           | 0.329799608               | 0.010047872                 | 1.428764893               |
| 2061                  | 72.86974681                      | 0.077730339                 | 66.06814664                           | 0.426772919               | 0.014790885                 | 1.287708026               |
| 4679                  | 123.073149                       | 0.028587729                 | 105.5130324                           | 0.305768836               | 0.008969923                 | 1.279397995               |
| 6511                  | 140.2640367                      | 0.024858404                 | 131.041978                            | 0.291848688               | 0.008364414                 | 1.142464085               |
| 4262                  | 131.487642                       | 0.032399079                 | 121.4907404                           | 0.318794552               | 0.009549161                 | 1.293120225               |
| 2331                  | 82.15838363                      | 0.0716882                   | 76.4852927                            | 0.415415368               | 0.014204394                 | 1.479097242               |
| 2355                  | 75.95393341                      | 0.071884998                 | 69.97142274                           | 0.415795153               | 0.014223878                 | 1.196569773               |
| 1359                  | 58.24946352                      | 0.100159426                 | 51.0881591                            | 0.464405415               | 0.016789772                 | 1.086695359               |
| 3276                  | 84.53401682                      | 0.056637899                 | 75.89466384                           | 0.384033442               | 0.012625612                 | 1.028106857               |
| 4453                  | 109.8590005                      | 0.038514693                 | 98.68130522                           | 0.337708621               | 0.010411471                 | 1.164257503               |
| 1362                  | 63.14269554                      | 0.107356214                 | 59.54829972                           | 0.475272183               | 0.017382509                 | 1.075983448               |
| 2657                  | 91.04394543                      | 0.057368883                 | 84.69356528                           | 0.385678532               | 0.012706826                 | 1.570859144               |
| 2474                  | 91.68424074                      | 0.061555683                 | 86.69356528                           | 0.394841432               | 0.013162335                 | 1.137367162               |
| 523                   | 41.78516483                      | 0.215203164                 | 36.61966685                           | 0.59926128                | 0.024610657                 | 1.208974472               |
| 3862                  | 98.49873096                      | 0.033343069                 | 92.0271699                            | 0.321861125               | 0.009687276                 | 1.017752753               |
| 3474                  | 103.0970417                      | 0.042922107                 | 93.77099765                           | 0.350128137               | 0.010991055                 | 1.20154139                |
| 1428                  | 60.9672043                       | 0.08345518                  | 53.07541804                           | 0.437003014               | 0.015325884                 | 1.148719828               |
| 3043                  | 105.6834897                      | 0.055241387                 | 95.34149149                           | 0.380850788               | 0.012468987                 | 2.007862405               |
| 411                   | 46.86149806                      | 0.220398607                 | 43.26661531                           | 0.604045447               | 0.024905961                 | 1.334818317               |
| 578                   | 40.80441153                      | 0.21468611                  | 36.61966685                           | 0.59878096                | 0.024581074                 | 1.118174365               |
| 3211                  | 126.3566381                      | 0.043983907                 | 96.93296653                           | 0.352991786               | 0.011126172                 | 1.700341144               |
| 1105                  | 68.54195795                      | 0.105054757                 | 51.6139516                            | 0.471851392               | 0.01719518                  | 1.441033175               |
| 1562                  | 68.93475176                      | 0.084896367                 | 65.7951366                            | 0.439504206               | 0.015457649                 | 1.432605855               |
| 4353                  | 100.1748471                      | 0.039866473                 | 89.09545443                           | 0.341614218               | 0.010592605                 | 1.069106329               |
| 4706                  | 111.5257818                      | 0.032485646                 | 97.34988444                           | 0.319078226               | 0.00956191                  | 1.172234218               |
| 884                   | 48.74423043                      | 0.159520283                 | 40.36087214                           | 0.542340416               | 0.021188823                 | 1.076949356               |
| 1763                  | 73.6076488                       | 0.088051425                 | 62.42595614                           | 0.444882645               | 0.01574226                  | 1.223981244               |
| 428                   | 38.18376618                      | 0.225909009                 | 34.20526275                           | 0.609038177               | 0.025215388                 | 1.062312257               |
| 888                   | 51                               | 0.133943973                 | 45                                    | 0.511651665               | 0.019416031                 | 1.207840322               |
| 1154                  | 62.49799997                      | 0.094763779                 | 56.36488268                           | 0.455911756               | 0.016331274                 | 1.233488062               |

| original_shape_SurfaceVolumeRatio | original_shape_Volume | original_shape_SphericalDisproportion | original_shape_Flatness | original_shape_SurfaceArea | original_shape_Maximum2DDiameterColumn |
|-----------------------------------|-----------------------|---------------------------------------|-------------------------|----------------------------|----------------------------------------|
| 0.31236535                        | 32481                 | 2.060891805                           | 1.316449712             | 10145.93894                | 52.47856705                            |
| 0.305514055                       | 54000                 | 2.387875374                           | 1.154243487             | 16497.75897                | 68.41052551                            |
| 0.326154585                       | 30186                 | 2.099944835                           | 1.290930102             | 9845.302299                | 44.59820624                            |
| 0.314823218                       | 66231                 | 2.633922949                           | 1.276231409             | 20851.05653                | 79.25906888                            |
| 0.320839878                       | 25623                 | 1.955904036                           | 1.143894277             | 8220.880181                | 46.86149806                            |
| 0.28385329                        | 44226                 | 2.075721236                           | 1.115789907             | 12553.69561                | 51.6139516                             |
| 0.316356638                       | 28539                 | 1.999120981                           | 1.149950029             | 9028.502083                | 47.4341649                             |
| 0.309796447                       | 48735                 | 2.339946702                           | 1.272344676             | 15097.92986                | 59.09314681                            |
| 0.338401522                       | 54729                 | 2.656770379                           | 1.258186305             | 18520.37689                | 68.41052551                            |
| 0.321680659                       | 81081                 | 2.879036628                           | 1.098052789             | 26082.18948                | 99.04544412                            |
| 0.300494079                       | 48789                 | 2.270522276                           | 1.035862187             | 14660.80564                | 53.07541804                            |
| 0.314903042                       | 45495                 | 2.324594937                           | 1.635485024             | 14326.51388                | 78.23042886                            |
| 0.305813694                       | 79083                 | 2.714358348                           | 1.186748021             | 24184.66434                | 73.23933369                            |
| 0.301714807                       | 50166                 | 2.300994906                           | 1.310846732             | 15135.82499                | 59.16924877                            |
| 0.327820298                       | 41796                 | 2.352501756                           | 1.141701679             | 13701.57717                | 68.01470429                            |
| 0.325319201                       | 110943                | 3.2324033                             | 1.26119815              | 36091.88816                | 138.9748179                            |
| 0.296362516                       | 43335                 | 2.152544221                           | 1.142280315             | 12842.86963                | 55.07267925                            |
| 0.310188711                       | 69066                 | 2.631661128                           | 1.218211925             | 21423.49355                | 70.29224708                            |
| 0.339068857                       | 30672                 | 2.194747063                           | 1.449923058             | 10399.91999                | 48.37354649                            |
| 0.297631238                       | 78327                 | 2.633287131                           | 1.482518405             | 23312.56195                | 90.69729875                            |
| 0.281448062                       | 187650                | 3.3193863                             | 1.225435127             | 52813.72876                | 120.9338662                            |
| 0.315371779                       | 57267                 | 2.513661817                           | 1.646587613             | 18060.39569                | 82.37718131                            |
| 0.315113745                       | 111267                | 3.134045874                           | 1.460053757             | 35061.76108                | 103.4456379                            |
| 0.319447368                       | 27810                 | 2.001315315                           | 1.651843169             | 8883.831291                | 50.91168825                            |
| 0.30389987                        | 70308                 | 2.593669516                           | 1.27617935              | 21366.59205                | 69.0651866                             |
| 0.323938666                       | 36504                 | 2.222075527                           | 1.028294946             | 11825.05705                | 45.79301257                            |
| 0.471911738                       | 59697                 | 3.813825554                           | 1.442625562             | 28171.71503                | 77.4209274                             |
| 0.331550589                       | 90585                 | 3.079057332                           | 2.117257397             | 30033.51011                | 107.3312629                            |
| 0.295078819                       | 91773                 | 2.752277509                           | 2.14969698              | 27080.26842                | 99.72462083                            |
| 0.337736159                       | 85293                 | 3.074193726                           | 1.215281294             | 28806.53019                | 76.4852927                             |
| 0.301553186                       | 111834                | 3.004261621                           | 1.609692527             | 33723.899                  | 99.31767214                            |
| 0.334366825                       | 135000                | 3.546911174                           | 1.204631895             | 45139.52132                | 125.6065285                            |
| 0.290742794                       | 68337                 | 2.457971287                           | 1.480807884             | 19868.49034                | 74.09453421                            |
| 0.337842919                       | 12987                 | 1.642102681                           | 1.186881482             | 4387.565993                | 31.89043744                            |
| 0.328137066                       | 23976                 | 1.956576092                           | 1.511998353             | 7867.414288                | 51.0881591                             |
| 0.290719084                       | 86859                 | 2.662324724                           | 1.047518002             | 25251.56891                | 68.47627326                            |
| 0.29590686                        | 96363                 | 2.805267922                           | 1.615108924             | 28514.4727                 | 101.2027668                            |
| 0.289772383                       | 91557                 | 2.700660874                           | 1.777007438             | 26530.69008                | 87.6184912                             |
| 0.313216933                       | 40068                 | 2.216292089                           | 1.220981134             | 12549.97606                | 51.0881591                             |
| 0.297043367                       | 44172                 | 2.171291287                           | 1.510694094             | 13120.99962                | 58.24946352                            |
| 0.320836845                       | 35532                 | 2.181088711                           | 1.858167702             | 11399.97477                | 59.77457654                            |
| 0.303455856                       | 52164                 | 2.344597836                           | 1.391274096             | 15829.47125                | 61.84658438                            |
| 0.288912229                       | 81729                 | 2.59262992                            | 1.131477699             | 23612.50756                | 85.90692638                            |
| 0.307490629                       | 50868                 | 2.355931439                           | 1.272252869             | 15641.43331                | 66.06814664                            |
| 0.274664936                       | 94338                 | 2.58552049                            | 1.191332204             | 25911.3407                 | 81.60882305                            |
| 0.302513464                       | 96525                 | 2.869506334                           | 2.556323001             | 29200.11212                | 107.4150827                            |
| 0.31350967                        | 99522                 | 3.00427614                            | 1.38118191              | 31201.10942                | 96.93296653                            |
| 0.286711608                       | 40932                 | 2.04322161                            | 1.064329096             | 11735.67952                | 49.2036584                             |
| 0.330860176                       | 15228                 | 1.695800117                           | 1.355249904             | 5038.338755                | 36.12478374                            |
| 0.316357025                       | 29430                 | 2.0197151                             | 1.246331043             | 9310.387247                | 45                                     |
| 0.303942887                       | 107568                | 2.989066366                           | 1.208377859             | 32694.52847                | 89.19641248                            |
| 0.277875733                       | 52812                 | 2.155811093                           | 1.042721041             | 14675.17323                | 55.15432893                            |
| 0.302634514                       | 102519                | 2.928885887                           | 1.291817326             | 31025.78772                | 101.8675611                            |
| 0.317371817                       | 31617                 | 2.075189622                           | 1.497872943             | 10034.34474                | 49.2036584                             |
| 0.301291811                       | 106299                | 2.951297087                           | 1.06544945              | 32027.01818                | 109.2016483                            |
| 0.29738035                        | 50976                 | 2.280079881                           | 1.080670571             | 15159.26075                | 55.31726674                            |
| 0.312639726                       | 88533                 | 2.88134391                            | 1.164023018             | 27678.9329                 | 91.83136719                            |
| 0.294220753                       | 65664                 | 2.454510853                           | 1.007172491             | 19319.71154                | 76.4852927                             |
| 0.312923188                       | 37044                 | 2.157046864                           | 1.47088072              | 11591.92659                | 55.80322571                            |
| 0.302160075                       | 37935                 | 2.099421555                           | 1.278389599             | 11462.44246                | 61.84658438                            |
| 0.309816084                       | 79407                 | 2.753633258                           | 1.091980925             | 24601.56577                | 72.62231062                            |
| 0.295196751                       | 148149                | 3.22993431                            | 1.336591824             | 43733.10342                | 112.0892502                            |
| 0.313555559                       | 61317                 | 2.556764218                           | 2.313738546             | 19226.28621                | 122.4499898                            |
| 0.316768832                       | 50436                 | 2.420129082                           | 1.138147263             | 15976.5528                 | 71.30918594                            |
| 0.333405593                       | 15930                 | 1.73471186                            | 1.601984542             | 5311.151089                | 38.41874542                            |
| 0.316510323                       | 41661                 | 2.268891097                           | 2.481255942             | 13186.13656                | 78                                     |
| 0.317462992                       | 28566                 | 2.006744696                           | 1.073773392             | 9068.647816                | 46.66904756                            |
| 0.294585366                       | 96282                 | 2.791957129                           | 1.53851541              | 28363.26821                | 88.58893836                            |
| 0.284980885                       | 34911                 | 1.925982647                           | 1.061231067             | 9948.967685                | 45                                     |
| 0.301706363                       | 67689                 | 2.542570739                           | 1.508464886             | 20422.20202                | 78.23042886                            |
| 0.313001982                       | 102816                | 3.032144294                           | 1.147614648             | 32181.6118                 | 84.69356528                            |
| 0.296806462                       | 55647                 | 2.343166482                           | 1.12190772              | 16516.38919                | 61.84658438                            |
| 0.315199341                       | 126333                | 3.270444474                           | 1.513904586             | 39820.07839                | 110.1453585                            |
| 0.295793908                       | 75797                 | 3.426433079                           | 1.725419301             | 51999.68166                | 131.5902732                            |
| 0.311875192                       | 115074                | 3.13681647                            | 2.335765075             | 35888.72589                | 108.1665383                            |
| 0.292661922                       | 62937                 | 2.407229192                           | 1.082071495             | 18419.26337                | 62.42595614                            |
| 0.29139794                        | 63585                 | 2.40503044                            | 1.223880814             | 18528.538                  | 60                                     |
| 0.313371122                       | 36693                 | 2.153290997                           | 1.137915563             | 11498.53019                | 53.41348144                            |
| 0.28262627                        | 88452                 | 2.603939894                           | 1.438477185             | 24998.85886                | 76.89603371                            |
| 0.290137028                       | 120231                | 2.961132583                           | 1.467424694             | 34883.465                  | 83.19254774                            |
| 0.305981219                       | 36774                 | 2.104057499                           | 1.453715305             | 11252.15336                | 51                                     |
| 0.301768256                       | 71739                 | 2.592832938                           | 1.193518216             | 21648.55294                | 66.40783086                            |
| 0.301860939                       | 66798                 | 2.532662273                           | 2.304776798             | 20163.70703                | 84.69356528                            |
| 0.333871557                       | 14121                 | 1.668721197                           | 1.268177771             | 4714.60026                 | 34.20526275                            |
| 0.319220119                       | 104274                | 3.10693005                            | 1.662699886             | 33286.35872                | 95.34149149                            |
| 0.303989969                       | 93798                 | 2.856097226                           | 1.198356657             | 28513.65107                | 99.72462083                            |
| 0.327568678                       | 38556                 | 2.288313735                           | 1.090441828             | 12629.73795                | 51                                     |
| 0.292083726                       | 82161                 | 2.625700224                           | 1.091509746             | 23997.89102                | 57.31491952                            |
| 0.358932387                       | 11097                 | 1.655504574                           | 2.01722217              | 3983.072702                | 31.89043744                            |
| 0.323185803                       | 15606                 | 1.670059784                           | 1.324868033             | 5043.637645                | 34.98571137                            |
| 0.30954099                        | 86697                 | 2.832927107                           | 1.072917568             | 26836.27525                | 80.49844719                            |
| 0.330448311                       | 29835                 | 2.119311329                           | 1.46983131              | 9858.925367                | 57.70615219                            |
| 0.316110915                       | 42174                 | 2.275291082                           | 1.257002587             | 13331.66171                | 55.15432893                            |
| 0.28899969                        | 117531                | 2.927278634                           | 1.203419782             | 33966.42257                | 99.04544412                            |
| 0.30147298                        | 127062                | 3.134027706                           | 1.598649176             | 38305.75977                | 106.0660172                            |
| 0.309699244                       | 23868                 | 1.843860369                           | 1.081802405             | 7391.901545                | 42.42640687                            |
| 0.299939251                       | 47601                 | 2.247783797                           | 1.412982822             | 14277.40826                | 66.06814664                            |
| 0.351212876                       | 11556                 | 1.641933194                           | 1.459727254             | 4058.615998                | 31.89043744                            |
| 0.327781287                       | 23976                 | 1.954454697                           | 1.118762093             | 7858.884137                | 43.26661531                            |
| 0.33709073                        | 31158                 | 2.19340692                            | 1.558675406             | 10503.07296                | 52.47856705                            |

| original_shape_Maximum2DDiameterRow | log.sigma.5.0.mm.3D_gldm_GrayLevelVariance | log.sigma.5.0.mm.3D_gldm_HighGrayLevelEmphasis | log.sigma.5.0.mm.3D_gldm_GrayLevelNonUniformityNormalized |
|-------------------------------------|--------------------------------------------|------------------------------------------------|-----------------------------------------------------------|
| 51.26402247                         | 26.68777903                                | 248.2842893                                    | 0.054324565                                               |
| 72.99315036                         | 17.85774375                                | 362.7955                                       | 0.0731035                                                 |
| 52.39274759                         | 18.61256284                                | 232.1958855                                    | 0.070738701                                               |
| 80.72174428                         | 16.76234779                                | 140.2865879                                    | 0.072723916                                               |
| 45                                  | 17.31917242                                | 138.5511064                                    | 0.082223982                                               |
| 49.92995093                         | 15.08537467                                | 131.035409                                     | 0.091193436                                               |
| 45.79301257                         | 13.33534243                                | 64.20719016                                    | 0.106591279                                               |
| 57.70615219                         | 23.39030732                                | 300.6819945                                    | 0.06183777                                                |
| 66.61080993                         | 20.56648272                                | 230.3660582                                    | 0.065223333                                               |
| 85.38149682                         | 23.2016515                                 | 578.9080919                                    | 0.060297899                                               |
| 60                                  | 10.64249373                                | 91.59269507                                    | 0.093884724                                               |
| 68.41052551                         | 15.6004142                                 | 268.9863501                                    | 0.074569997                                               |
| 69.0651866                          | 12.0646683                                 | 140.7620348                                    | 0.089546023                                               |
| 61.55485359                         | 13.74770492                                | 136.5780409                                    | 0.075542182                                               |
| 53.41348144                         | 25.70823902                                | 267.2416021                                    | 0.061376186                                               |
| 124.3100961                         | 23.9547283                                 | 368.4641032                                    | 0.062122743                                               |
| 49.2036584                          | 18.90742908                                | 353.6492212                                    | 0.07189643                                                |
| 90                                  | 18.69981679                                | 249.0320563                                    | 0.06856351                                                |
| 57.31491952                         | 12.92971385                                | 250.0246479                                    | 0.079959953                                               |
| 99.90495483                         | 17.95081348                                | 240.4860393                                    | 0.074110949                                               |
| 119.7747887                         | 17.81846532                                | 374.0392806                                    | 0.070866932                                               |
| 76.89603371                         | 19.28018573                                | 260.1956624                                    | 0.067282764                                               |
| 112.7297654                         | 20.81642402                                | 346.3557389                                    | 0.066357936                                               |
| 48.83646179                         | 20.91870676                                | 171.231068                                     | 0.065640494                                               |
| 81.9390017                          | 22.49996048                                | 231.2380952                                    | 0.061436854                                               |
| 66.40783086                         | 23.08363623                                | 269.9593195                                    | 0.064582166                                               |
| 90.7964757                          | 20.84238853                                | 231.3876074                                    | 0.062250525                                               |
| 125.1758763                         | 18.36962302                                | 292.2992548                                    | 0.06700918                                                |
| 104.4844486                         | 17.3771328                                 | 405.1391586                                    | 0.077485279                                               |
| 80.77747211                         | 19.6142187                                 | 472.9711934                                    | 0.068952162                                               |
| 119.0965994                         | 21.31771584                                | 336.7274264                                    | 0.065275548                                               |
| 112.4499889                         | 20.15580096                                | 397.8828                                       | 0.06689576                                                |
| 69.97142274                         | 23.50904041                                | 614.0892928                                    | 0.071755198                                               |
| 33.9411255                          | 18.47416807                                | 177.5696466                                    | 0.067414128                                               |
| 50.91168825                         | 14.35128921                                | 117.8727477                                    | 0.077517551                                               |
| 76.83749085                         | 12.77279053                                | 198.5436742                                    | 0.083271387                                               |
| 118.7939392                         | 28.06271071                                | 458.27935                                      | 0.057755912                                               |
| 85.90692638                         | 13.17678964                                | 259.3733412                                    | 0.081999196                                               |
| 57.70615219                         | 10.51935243                                | 164.5033693                                    | 0.099345399                                               |
| 55.80322571                         | 16.013010781                               | 133.3698044                                    | 0.080982748                                               |
| 64.41273166                         | 12.48095627                                | 156.3168693                                    | 0.081238856                                               |
| 59.54829972                         | 12.13455842                                | 164.3478261                                    | 0.082631414                                               |
| 66.06814664                         | 13.82124561                                | 257.9012223                                    | 0.08048923                                                |
| 72.24956747                         | 16.9759859                                 | 161.8052017                                    | 0.079411042                                               |
| 71.56116265                         | 26.4041302                                 | 397.9645106                                    | 0.06237498                                                |
| 108.3743512                         | 18.19314361                                | 165.7255944                                    | 0.064649812                                               |
| 96.93296653                         | 21.09524475                                | 454.3358654                                    | 0.064917659                                               |
| 50.91168825                         | 15.26349197                                | 294.5237467                                    | 0.089962128                                               |
| 36.12478374                         | 13.8346254                                 | 98.61170213                                    | 0.08392435                                                |
| 49.65883607                         | 18.63668378                                | 209.1779817                                    | 0.068529585                                               |
| 99.85990186                         | 17.03790608                                | 358.2763554                                    | 0.078781491                                               |
| 57.31491952                         | 10.21672396                                | 218.101227                                     | 0.11123448                                                |
| 101.2027668                         | 18.45167647                                | 213.545694                                     | 0.070368752                                               |
| 48.37354649                         | 17.57793269                                | 404.1989752                                    | 0.070843127                                               |
| 143.1223253                         | 19.90239722                                | 284.2600965                                    | 0.062556835                                               |
| 58.24946352                         | 26.40174227                                | 296.871822                                     | 0.056390944                                               |
| 87.20665112                         | 21.50684557                                | 511.1726136                                    | 0.066427973                                               |
| 59.54829972                         | 16.24190008                                | 169.1587171                                    | 0.096636405                                               |
| 57.31491952                         | 14.6085363                                 | 210.3841108                                    | 0.081690027                                               |
| 46.86149806                         | 7.684302884                                | 149.3366548                                    | 0.103713479                                               |
| 76.66159404                         | 20.52683207                                | 202.1026862                                    | 0.062191362                                               |
| 115.7626883                         | 18.75438797                                | 381.4322945                                    | 0.073149787                                               |
| 92.4175308                          | 16.29042581                                | 319.0902686                                    | 0.073930269                                               |
| 89.49860334                         | 18.34771355                                | 176.8811563                                    | 0.064081636                                               |
| 36.61966685                         | 15.42706406                                | 207.9779661                                    | 0.072536627                                               |
| 60.74537019                         | 20.35326726                                | 133.5832793                                    | 0.066472506                                               |
| 40.80441153                         | 24.35530176                                | 157.1493384                                    | 0.063323459                                               |
| 81.88406438                         | 23.31120055                                | 191.823051                                     | 0.060664392                                               |
| 45                                  | 13.67590614                                | 202.2761021                                    | 0.077135555                                               |
| 75.89466384                         | 22.37282382                                | 337.5309134                                    | 0.064398066                                               |
| 101.9117265                         | 34.15148387                                | 399.5254727                                    | 0.051009236                                               |
| 63.78087488                         | 13.70828216                                | 174.6817079                                    | 0.090451091                                               |
| 110.3086579                         | 20.78855879                                | 424.4644155                                    | 0.068487562                                               |
| 131.7269904                         | 16.31323256                                | 341.7634772                                    | 0.074458566                                               |
| 128.26535                           | 25.2706183                                 | 344.2475364                                    | 0.057529011                                               |
| 68.47627326                         | 22.0819389                                 | 342.0789361                                    | 0.062489958                                               |
| 63.28506933                         | 12.9498576                                 | 231.1987261                                    | 0.085297668                                               |
| 48.37354649                         | 16.62271256                                | 220.0051508                                    | 0.075184595                                               |
| 69.26037828                         | 15.86035376                                | 275.6446886                                    | 0.078033569                                               |
| 104.7854952                         | 18.06413034                                | 345.1434988                                    | 0.078592797                                               |
| 48.37354649                         | 21.7992743                                 | 613.0888399                                    | 0.080076807                                               |
| 81.60882305                         | 23.61041349                                | 397.4949191                                    | 0.062198135                                               |
| 85.38149682                         | 21.33645173                                | 390.7405012                                    | 0.067163496                                               |
| 36.61966685                         | 8.368831093                                | 90.19694073                                    | 0.111224038                                               |
| 95.34149149                         | 21.08220727                                | 368.3322113                                    | 0.065258943                                               |
| 87                                  | 19.03460835                                | 147.6030512                                    | 0.066083968                                               |
| 53.41348144                         | 24.76799102                                | 313.2682073                                    | 0.059529694                                               |
| 96.60745313                         | 13.23864504                                | 144.0752547                                    | 0.079275267                                               |
| 38.41874542                         | 6.714168161                                | 81.23600973                                    | 0.115799693                                               |
| 32.44996148                         | 15.68848553                                | 129.9342561                                    | 0.073957448                                               |
| 103.4456379                         | 17.30240189                                | 291.2765494                                    | 0.069972313                                               |
| 64.20280368                         | 18.46154174                                | 189.680543                                     | 0.067670195                                               |
| 64.62197769                         | 11.90756991                                | 188.5320102                                    | 0.08796464                                                |
| 93.1933474                          | 16.27082706                                | 314.0374454                                    | 0.080429281                                               |
| 106.0660172                         | 13.67302766                                | 191.9460263                                    | 0.078581493                                               |
| 42.42640687                         | 45.6859145                                 | 550.7149321                                    | 0.046789583                                               |
| 61.84658438                         | 11.31432622                                | 171.1366988                                    | 0.096404346                                               |
| 32.44996148                         | 15.1137381                                 | 103.4649533                                    | 0.073543541                                               |
| 41.67733197                         | 11.21387139                                | 96.13175676                                    | 0.093471005                                               |
| 59.09314681                         | 34.84064545                                | 349.1499133                                    | 0.052418083                                               |

| log.sigma.5.0.mm.3D_gldm_DependenceEntropy | log.sigma.5.0.mm.3D_gldm_DependenceNonUniformity | log.sigma.5.0.mm.3D_gldm_GrayLevelNonUniformity | log.sigma.5.0.mm.3D_gldm_SmallDependenceEmphasis |
|--------------------------------------------|--------------------------------------------------|-------------------------------------------------|--------------------------------------------------|
| 7.001440053                                | 174.1970075                                      | 65.3524522                                      | 0.231235572                                      |
| 6.930574137                                | 256.888                                          | 146.207                                         | 0.156636365                                      |
| 6.773858495                                | 166.3703041                                      | 79.08586762                                     | 0.182682425                                      |
| 7.047320075                                | 304.3102324                                      | 178.3917652                                     | 0.16674492                                       |
| 6.800706237                                | 100.8651212                                      | 78.03055848                                     | 0.168839821                                      |
| 6.86422049                                 | 181.1489621                                      | 149.3748474                                     | 0.121435944                                      |
| 6.743063885                                | 83.41248817                                      | 112.666982                                      | 0.113332842                                      |
| 7.153770068                                | 228.567867                                       | 111.6171745                                     | 0.168717013                                      |
| 7.054858499                                | 262.6171682                                      | 132.2076961                                     | 0.206300011                                      |
| 7.106436947                                | 446.5930736                                      | 181.0745921                                     | 0.198952747                                      |
| 6.890978013                                | 182.5307139                                      | 169.6496956                                     | 0.114835396                                      |
| 6.871707171                                | 229.8498516                                      | 125.6504451                                     | 0.196911888                                      |
| 7.147067183                                | 283.3523387                                      | 262.2803004                                     | 0.130814301                                      |
| 6.763876586                                | 259.2863294                                      | 140.3573735                                     | 0.169730308                                      |
| 7.213496135                                | 200.4095607                                      | 95.01033592                                     | 0.21712718                                       |
| 7.380211126                                | 508.7517644                                      | 255.2623509                                     | 0.175328279                                      |
| 7.050819503                                | 206.9252336                                      | 115.3937695                                     | 0.164974402                                      |
| 7.238128107                                | 271.3479281                                      | 175.3854574                                     | 0.156721481                                      |
| 6.696637329                                | 154.7007042                                      | 90.83450704                                     | 0.193097911                                      |
| 7.179526279                                | 329.7528438                                      | 214.9958635                                     | 0.148428166                                      |
| 7.244756478                                | 858.5772662                                      | 492.5251799                                     | 0.155431941                                      |
| 7.133146323                                | 275.8137671                                      | 142.7067421                                     | 0.178374896                                      |
| 7.131864503                                | 570.0419801                                      | 273.4610531                                     | 0.173579792                                      |
| 6.912352977                                | 139.7728155                                      | 67.60970874                                     | 0.189031466                                      |
| 6.993385832                                | 399.4961598                                      | 159.9815668                                     | 0.197917711                                      |
| 6.932415648                                | 205.8964497                                      | 87.31508876                                     | 0.226660991                                      |
| 7.020721142                                | 310.7033017                                      | 137.6359114                                     | 0.202946409                                      |
| 6.849229344                                | 536.1958271                                      | 224.8157973                                     | 0.211013339                                      |
| 7.012254858                                | 420.6187114                                      | 263.3724625                                     | 0.164217948                                      |
| 7.068652304                                | 404.9702437                                      | 217.8198797                                     | 0.204848208                                      |
| 7.293636267                                | 518.1825205                                      | 270.3713182                                     | 0.166444346                                      |
| 7.222658207                                | 639.91                                           | 334.4788                                        | 0.200243838                                      |
| 7.220901439                                | 281.6527064                                      | 181.6124062                                     | 0.1594122                                        |
| 6.633998769                                | 63.46985447                                      | 32.42619543                                     | 0.240717245                                      |
| 6.853868597                                | 108.1981982                                      | 68.83558559                                     | 0.161495263                                      |
| 6.949370895                                | 384.850171                                       | 267.8840535                                     | 0.14057764                                       |
| 7.220323411                                | 526.6295881                                      | 206.130849                                      | 0.205575303                                      |
| 6.967522741                                | 412.5128281                                      | 278.0592746                                     | 0.142922206                                      |
| 6.959710589                                | 138.3530997                                      | 147.4285714                                     | 0.107342361                                      |
| 7.0807825                                  | 167.6381418                                      | 132.4877751                                     | 0.154411063                                      |
| 6.7424056                                  | 168.2537994                                      | 106.9103343                                     | 0.179729615                                      |
| 6.936951711                                | 224.6563147                                      | 159.6438923                                     | 0.153135118                                      |
| 7.040077911                                | 330.872481                                       | 243.6408986                                     | 0.124376188                                      |
| 7.058445713                                | 195.2643312                                      | 149.6104034                                     | 0.166726262                                      |
| 7.467268716                                | 404.6164854                                      | 217.9381797                                     | 0.180179914                                      |
| 7.138674132                                | 470.3046154                                      | 231.1230769                                     | 0.154644261                                      |
| 7.230359785                                | 487.5029843                                      | 239.2864894                                     | 0.191513851                                      |
| 6.937765892                                | 158.8007916                                      | 136.3825858                                     | 0.138762084                                      |
| 6.377069941                                | 62.69858156                                      | 47.33333333                                     | 0.179552154                                      |
| 6.993672578                                | 128.5706422                                      | 74.69724771                                     | 0.160451705                                      |
| 7.186949365                                | 404.9643574                                      | 313.8654618                                     | 0.131875779                                      |
| 6.894967307                                | 173.9570552                                      | 217.5746421                                     | 0.096766661                                      |
| 7.178821749                                | 422.7498025                                      | 267.1901501                                     | 0.140460155                                      |
| 6.895888188                                | 156.9146029                                      | 82.95730145                                     | 0.178297377                                      |
| 7.207547122                                | 533.8945898                                      | 246.2862586                                     | 0.183929303                                      |
| 7.246564765                                | 266.6493644                                      | 106.4661017                                     | 0.194133575                                      |
| 7.135300633                                | 434.9957304                                      | 217.8173224                                     | 0.204032497                                      |
| 7.169971664                                | 198.8824013                                      | 235.0197368                                     | 0.123729312                                      |
| 6.749058118                                | 184.1997085                                      | 112.0787172                                     | 0.165133287                                      |
| 6.5394005                                  | 166.8633452                                      | 145.7174377                                     | 0.104304673                                      |
| 7.332198773                                | 322.2784767                                      | 182.9047943                                     | 0.171914403                                      |
| 7.222966312                                | 636.8899216                                      | 401.3728814                                     | 0.155165268                                      |
| 7.081910874                                | 275.4297666                                      | 167.8956407                                     | 0.173164572                                      |
| 6.718655325                                | 306.6905782                                      | 119.7044968                                     | 0.210040172                                      |
| 6.422598684                                | 95.11186441                                      | 42.79661017                                     | 0.244429897                                      |
| 6.863153096                                | 211.8412184                                      | 102.5670771                                     | 0.202655407                                      |
| 7.090061614                                | 122.6786389                                      | 66.99621928                                     | 0.15644522                                       |
| 7.201069365                                | 456.7178912                                      | 216.3292204                                     | 0.169150641                                      |
| 6.79798889                                 | 163.8321732                                      | 99.73627224                                     | 0.146901347                                      |
| 7.189699214                                | 325.1930594                                      | 161.4459513                                     | 0.172705815                                      |
| 7.275215437                                | 603.4957983                                      | 194.2431723                                     | 0.229372755                                      |
| 6.86787504                                 | 223.7501213                                      | 186.4196992                                     | 0.147093384                                      |
| 7.229442199                                | 587.7941868                                      | 320.453302                                      | 0.184260053                                      |
| 7.056562801                                | 848.3524804                                      | 484.7997235                                     | 0.160605409                                      |
| 7.36149541                                 | 561.8456124                                      | 245.1886438                                     | 0.193728755                                      |
| 7.122285022                                | 311.7353067                                      | 145.6640927                                     | 0.183672887                                      |
| 7.052366483                                | 239.8985138                                      | 200.8760085                                     | 0.13736288                                       |
| 6.85443921                                 | 181.6799117                                      | 102.1758646                                     | 0.163508041                                      |
| 6.979404379                                | 421.3431013                                      | 255.6379731                                     | 0.16278756                                       |
| 7.164308322                                | 518.2113182                                      | 349.9737256                                     | 0.14788351                                       |
| 6.964458717                                | 167.0763583                                      | 109.0646109                                     | 0.192543437                                      |
| 7.034511026                                | 408.7372977                                      | 165.2604441                                     | 0.195959934                                      |
| 7.0378337                                  | 344.4850445                                      | 166.1624899                                     | 0.184281037                                      |
| 6.41793598                                 | 47.84512428                                      | 58.17017208                                     | 0.130756892                                      |
| 7.149602611                                | 539.701709                                       | 252.0300363                                     | 0.178699467                                      |
| 7.368297515                                | 372.8796776                                      | 229.5757052                                     | 0.148293933                                      |
| 7.027368308                                | 215.5182073                                      | 85.00840336                                     | 0.210749361                                      |
| 6.951346966                                | 356.497864                                       | 241.2346369                                     | 0.143536567                                      |
| 5.87222793                                 | 50.44038929                                      | 47.59367397                                     | 0.185811349                                      |
| 6.604815737                                | 78.84429066                                      | 42.74740484                                     | 0.180920765                                      |
| 7.064516638                                | 390.5316101                                      | 224.6810962                                     | 0.184685273                                      |
| 6.825780035                                | 157.4886878                                      | 74.77556561                                     | 0.196721581                                      |
| 7.708924791                                | 210.1126761                                      | 137.4007682                                     | 0.16125049                                       |
| 7.168942109                                | 481.997473                                       | 350.1086607                                     | 0.128203734                                      |
| 7.107406491                                | 555.1840204                                      | 369.8045049                                     | 0.157052425                                      |
| 6.841819471                                | 180.2058824                                      | 41.36199095                                     | 0.321635434                                      |
| 6.815390015                                | 183.332388                                       | 169.9608622                                     | 0.131259202                                      |
| 6.356187026                                | 56.60747664                                      | 31.47663551                                     | 0.193771089                                      |
| 6.819575682                                | 87.48873874                                      | 83.00225225                                     | 0.129894027                                      |
| 6.82377544                                 | 234.202773                                       | 60.49046794                                     | 0.294609394                                      |

| log.sigma.5.0.mm.3D_gldm_DependenceNonUniformityNormalized | log.sigma.5.0.mm.3D_gldm_DependenceVariance | log.sigma.5.0.mm.3D_gldm_LargeDependenceEmphasis |
|------------------------------------------------------------|---------------------------------------------|--------------------------------------------------|
| 0.144802167                                                | 5.08036227                                  | 19.16625104                                      |
| 0.128444                                                   | 5.304311                                    | 24.515                                           |
| 0.148810648                                                | 5.108579402                                 | 20.72450805                                      |
| 0.124056352                                                | 6.397058503                                 | 26.32001631                                      |
| 0.106285691                                                | 9.992074182                                 | 34.59325606                                      |
| 0.110591552                                                | 8.657362309                                 | 35.42124542                                      |
| 0.078914369                                                | 19.23921167                                 | 62.90917692                                      |
| 0.126630397                                                | 5.841356036                                 | 24.84709141                                      |
| 0.12955953                                                 | 7.826434403                                 | 25.62258497                                      |
| 0.148715642                                                | 5.024126944                                 | 19.97369297                                      |
| 0.101013123                                                | 9.647780613                                 | 39.77919203                                      |
| 0.136409407                                                | 5.374538474                                 | 21.56023739                                      |
| 0.0967403                                                  | 13.09810059                                 | 44.39160123                                      |
| 0.139551308                                                | 4.599048017                                 | 21.61356297                                      |
| 0.129463541                                                | 7.455574919                                 | 24.67700258                                      |
| 0.123814009                                                | 14.1403143                                  | 36.62715989                                      |
| 0.128925379                                                | 6.786993915                                 | 26.2623053                                       |
| 0.106078158                                                | 9.976192063                                 | 35.16419077                                      |
| 0.136180197                                                | 5.288670403                                 | 21.77112676                                      |
| 0.113668681                                                | 7.855634657                                 | 31.17511203                                      |
| 0.123536297                                                | 7.057550313                                 | 27.76201439                                      |
| 0.130039494                                                | 5.79540399                                  | 23.87694484                                      |
| 0.13832613                                                 | 5.625525735                                 | 22.91021597                                      |
| 0.135701763                                                | 7.024786502                                 | 24.84466019                                      |
| 0.153416344                                                | 4.873632908                                 | 19.29262673                                      |
| 0.152290273                                                | 5.294860124                                 | 19.08136095                                      |
| 0.140526143                                                | 4.787349794                                 | 20.15332429                                      |
| 0.159819919                                                | 4.036321526                                 | 17.23129657                                      |
| 0.123747782                                                | 6.012482428                                 | 25.90791409                                      |
| 0.128195709                                                | 6.03183055                                  | 23.23108579                                      |
| 0.125104423                                                | 6.438252514                                 | 26.09512313                                      |
| 0.127982                                                   | 6.78610224                                  | 24.49                                            |
| 0.111281196                                                | 8.589903373                                 | 32.21849072                                      |
| 0.131953959                                                | 9.264085131                                 | 26.6049896                                       |
| 0.121844818                                                | 8.594346035                                 | 30.22522523                                      |
| 0.119630143                                                | 6.730148325                                 | 29.22256761                                      |
| 0.147556623                                                | 5.367043235                                 | 20.25077052                                      |
| 0.121649315                                                | 6.896746388                                 | 29.29076968                                      |
| 0.093229852                                                | 10.53581237                                 | 44.47978437                                      |
| 0.102468302                                                | 12.32588429                                 | 39.97188264                                      |
| 0.127852431                                                | 7.040432923                                 | 25.95896657                                      |
| 0.116281736                                                | 8.793153556                                 | 31.9047619                                       |
| 0.109307063                                                | 8.457599695                                 | 35.38982491                                      |
| 0.103643488                                                | 9.889953841                                 | 35.15605096                                      |
| 0.11580323                                                 | 12.1922917                                  | 35.09730967                                      |
| 0.131553739                                                | 5.4723303115                                | 24.60895105                                      |
| 0.132257999                                                | 6.369932248                                 | 23.78459034                                      |
| 0.104749863                                                | 9.005282266                                 | 35.38258575                                      |
| 0.111167698                                                | 7.904808611                                 | 30.08156028                                      |
| 0.117954718                                                | 8.0021345                                   | 29.87706422                                      |
| 0.10164768                                                 | 9.703452364                                 | 37.8062249                                       |
| 0.0889351                                                  | 12.38150978                                 | 50.32106339                                      |
| 0.111337846                                                | 7.681624647                                 | 32.32473005                                      |
| 0.134000515                                                | 5.437601414                                 | 23.05465414                                      |
| 0.135609497                                                | 6.457016011                                 | 23.97688595                                      |
| 0.141233774                                                | 5.513730789                                 | 21.46292373                                      |
| 0.132661095                                                | 6.508379728                                 | 23.51174138                                      |
| 0.081777303                                                | 16.92338718                                 | 56.62582237                                      |
| 0.134256347                                                | 5.625139185                                 | 23.74344023                                      |
| 0.118763947                                                | 6.360412862                                 | 32.83345196                                      |
| 0.109581257                                                | 9.884364623                                 | 33.36450187                                      |
| 0.116072521                                                | 7.134777501                                 | 29.26608347                                      |
| 0.121281271                                                | 7.03696814                                  | 27.11889036                                      |
| 0.164181252                                                | 3.635056101                                 | 16.30835118                                      |
| 0.16120655                                                 | 4.912887101                                 | 17.43728814                                      |
| 0.137291781                                                | 4.900220048                                 | 20.61633182                                      |
| 0.115953345                                                | 8.187252761                                 | 30.71833648                                      |
| 0.128075685                                                | 5.446500869                                 | 24.22265844                                      |
| 0.126707017                                                | 5.549260729                                 | 25.85846868                                      |
| 0.129714025                                                | 7.409359259                                 | 26.51814918                                      |
| 0.158481039                                                | 4.315350865                                 | 17.06670168                                      |
| 0.108563863                                                | 7.79192042                                  | 32.30907327                                      |
| 0.125623891                                                | 7.372487541                                 | 26.39431502                                      |
| 0.130295267                                                | 5.611898025                                 | 24.51589618                                      |
| 0.131826751                                                | 5.952226314                                 | 23.13327076                                      |
| 0.13373458                                                 | 5.530103739                                 | 22.84298584                                      |
| 0.101867734                                                | 9.486215803                                 | 36.96518047                                      |
| 0.133686469                                                | 6.027260013                                 | 24.57615894                                      |
| 0.12861511                                                 | 6.038951281                                 | 25.13553114                                      |
| 0.116373528                                                | 7.597612693                                 | 30.21401302                                      |
| 0.122669867                                                | 7.196308012                                 | 26.24229075                                      |
| 0.153834135                                                | 4.013378002                                 | 18.05683101                                      |
| 0.139242136                                                | 4.875616353                                 | 21.18755053                                      |
| 0.091482073                                                | 15.79233646                                 | 51.13001912                                      |
| 0.139746688                                                | 5.596636792                                 | 22.41895391                                      |
| 0.107334392                                                | 10.47718872                                 | 36.28382268                                      |
| 0.150923114                                                | 4.775614167                                 | 19.00140056                                      |
| 0.117153422                                                | 6.722391045                                 | 29.66973382                                      |
| 0.122726008                                                | 6.313827174                                 | 25.34549878                                      |
| 0.136408807                                                | 5.914129381                                 | 23.06920415                                      |
| 0.121623049                                                | 6.448181426                                 | 25.84272812                                      |
| 0.142523699                                                | 5.039328433                                 | 20.65791855                                      |
| 0.134515158                                                | 6.379425898                                 | 25.36491677                                      |
| 0.110727653                                                | 8.360549315                                 | 34.0172295                                       |
| 0.117973655                                                | 7.31445457                                  | 29.00637484                                      |
| 0.203852808                                                | 2.57372392                                  | 10.55882353                                      |
| 0.103988876                                                | 9.435607266                                 | 37.44809983                                      |
| 0.132260459                                                | 5.6511049                                   | 22.71495327                                      |
| 0.098523354                                                | 12.23382335                                 | 42.70720721                                      |
| 0.202948677                                                | 2.92066777                                  | 11.59098787                                      |

|                                                              |                                                               |                                                               |
|--------------------------------------------------------------|---------------------------------------------------------------|---------------------------------------------------------------|
| log.sigma.5.0.mm.3D_gldm_LargeDependenceLowGrayLevelEmphasis | log.sigma.5.0.mm.3D_gldm_SmallDependenceHighGrayLevelEmphasis | log.sigma.5.0.mm.3D_gldm_LargeDependenceHighGrayLevelEmphasis |
| 0.154759161                                                  | 58.66210611                                                   | 3987.115544                                                   |
| 0.088220975                                                  | 56.38773506                                                   | 8143.8035                                                     |
| 0.114996332                                                  | 38.34173469                                                   | 5405.170841                                                   |
| 0.367866724                                                  | 24.87135243                                                   | 3094.586629                                                   |
| 0.5749287                                                    | 26.92338172                                                   | 3426.119073                                                   |
| 0.442040266                                                  | 18.12270976                                                   | 3868.39072                                                    |
| 3.519780213                                                  | 9.518296407                                                   | 2183.964995                                                   |
| 0.136427917                                                  | 50.45864091                                                   | 6783.754571                                                   |
| 0.18111182                                                   | 46.30763008                                                   | 4840.26739                                                    |
| 0.041295441                                                  | 110.3864497                                                   | 11768.5005                                                    |
| 0.834046029                                                  | 10.95058648                                                   | 2965.121195                                                   |
| 0.104973433                                                  | 49.30976701                                                   | 5764.456973                                                   |
| 0.465093742                                                  | 19.56417832                                                   | 5197.088426                                                   |
| 0.284418117                                                  | 21.02056407                                                   | 3044.911733                                                   |
| 0.149512072                                                  | 57.97226254                                                   | 5571.095607                                                   |
| 0.164591669                                                  | 66.09778181                                                   | 10884.46118                                                   |
| 0.086192953                                                  | 54.24536431                                                   | 9465.322741                                                   |
| 0.231219129                                                  | 40.499872                                                     | 7059.08835                                                    |
| 0.107428218                                                  | 44.54543194                                                   | 5503.066901                                                   |
| 0.227417396                                                  | 35.91077856                                                   | 6730.547397                                                   |
| 0.090705523                                                  | 55.27941008                                                   | 10292.90777                                                   |
| 0.126795735                                                  | 47.48702366                                                   | 6070.330504                                                   |
| 0.086994589                                                  | 62.85683294                                                   | 7373.448192                                                   |
| 0.330912184                                                  | 34.23341617                                                   | 3630.316505                                                   |
| 0.207836783                                                  | 42.42051604                                                   | 4750.850998                                                   |
| 0.10857786                                                   | 61.50085311                                                   | 4458.475592                                                   |
| 0.12416542                                                   | 44.29264497                                                   | 4679.160561                                                   |
| 0.079088613                                                  | 54.56904932                                                   | 5473.410432                                                   |
| 0.076287123                                                  | 60.57936154                                                   | 10573.11974                                                   |
| 0.053906118                                                  | 90.64927978                                                   | 11096.62805                                                   |
| 0.102777821                                                  | 52.58699722                                                   | 8942.496137                                                   |
| 0.108319856                                                  | 76.33778437                                                   | 9162.7456                                                     |
| 0.068031317                                                  | 97.63758739                                                   | 18484.69696                                                   |
| 0.31559329                                                   | 38.55862183                                                   | 3439.790021                                                   |
| 0.468352938                                                  | 18.26457908                                                   | 3477.875                                                      |
| 0.195721957                                                  | 27.97318273                                                   | 5445.693192                                                   |
| 0.057964098                                                  | 90.53723603                                                   | 9278.568507                                                   |
| 0.137605802                                                  | 35.17121116                                                   | 7480.847832                                                   |
| 0.362415833                                                  | 18.9988359                                                    | 6425.705526                                                   |
| 0.579999386                                                  | 23.06871574                                                   | 3888.168093                                                   |
| 0.235194478                                                  | 26.43176228                                                   | 3662.588906                                                   |
| 0.30095185                                                   | 26.24825584                                                   | 4316.186335                                                   |
| 0.187685081                                                  | 31.2933369                                                    | 8055.847043                                                   |
| 0.390977854                                                  | 30.54706076                                                   | 4290.806263                                                   |
| 0.111005197                                                  | 63.44724421                                                   | 13699.61305                                                   |
| 0.330266408                                                  | 23.73829484                                                   | 4317.313287                                                   |
| 0.068480183                                                  | 86.08043457                                                   | 10390.33587                                                   |
| 0.128732742                                                  | 34.78110759                                                   | 11363.14908                                                   |
| 0.750166743                                                  | 19.63435245                                                   | 2214.427305                                                   |
| 0.24360293                                                   | 36.94293679                                                   | 4848.699083                                                   |
| 0.138398538                                                  | 47.14375842                                                   | 12147.25477                                                   |
| 0.292684383                                                  | 20.67487871                                                   | 9943.740286                                                   |
| 0.244806008                                                  | 32.3656196                                                    | 5704.946273                                                   |
| 0.068653762                                                  | 66.12396388                                                   | 9109.850555                                                   |
| 0.117390767                                                  | 48.40751479                                                   | 6656.134112                                                   |
| 0.118209611                                                  | 59.87212399                                                   | 5844.327331                                                   |
| 0.066636296                                                  | 98.38430533                                                   | 11078.6688                                                    |
| 0.560252843                                                  | 25.25742108                                                   | 6876.599507                                                   |
| 0.158378743                                                  | 34.41846426                                                   | 4690.182945                                                   |
| 0.256687637                                                  | 13.06457943                                                   | 4970.062633                                                   |
| 0.313377164                                                  | 34.26218504                                                   | 5281.378443                                                   |
| 0.094683836                                                  | 57.50661752                                                   | 10818.2156                                                    |
| 0.103441912                                                  | 52.76273021                                                   | 8533.889916                                                   |
| 0.146234467                                                  | 32.37576729                                                   | 3359.255889                                                   |
| 0.116594315                                                  | 44.27873528                                                   | 3521.29661                                                    |
| 0.392410715                                                  | 31.82816716                                                   | 2192.690214                                                   |
| 0.559414804                                                  | 32.26324372                                                   | 3211.746692                                                   |
| 0.243877445                                                  | 34.40634357                                                   | 4034.281828                                                   |
| 0.170164122                                                  | 26.6098542                                                    | 5243.180974                                                   |
| 0.112617028                                                  | 59.38284744                                                   | 7989.462306                                                   |
| 0.091754209                                                  | 84.16900254                                                   | 6991.182511                                                   |
| 0.266443248                                                  | 26.61964434                                                   | 4780.868025                                                   |
| 0.088570614                                                  | 77.56239772                                                   | 10272.79526                                                   |
| 0.085005317                                                  | 50.53884374                                                   | 8798.121333                                                   |
| 0.100051674                                                  | 71.06730394                                                   | 7126.156969                                                   |
| 0.090743432                                                  | 60.52217627                                                   | 7493.241527                                                   |
| 0.199168034                                                  | 28.93368936                                                   | 8184.740127                                                   |
| 0.180848198                                                  | 35.00652392                                                   | 5081.104489                                                   |
| 0.109233424                                                  | 41.79509824                                                   | 7131.667277                                                   |
| 0.10449578                                                   | 47.43997306                                                   | 10522.38491                                                   |
| 0.047737598                                                  | 108.7210535                                                   | 15978.53818                                                   |
| 0.057331387                                                  | 73.61212508                                                   | 7381.631163                                                   |
| 0.070182796                                                  | 74.39682422                                                   | 7712.676637                                                   |
| 1.104190112                                                  | 11.63903256                                                   | 3139.382409                                                   |
| 0.093113906                                                  | 61.42375559                                                   | 8411.086225                                                   |
| 0.58465309                                                   | 21.85665981                                                   | 4065.520725                                                   |
| 0.088029342                                                  | 64.09803353                                                   | 5606.822829                                                   |
| 0.334463851                                                  | 20.54610982                                                   | 3803.022346                                                   |
| 0.408254499                                                  | 11.23444942                                                   | 2434.705596                                                   |
| 0.390940723                                                  | 21.30382828                                                   | 2994.221453                                                   |
| 0.123022576                                                  | 55.04931375                                                   | 6589.434756                                                   |
| 0.16693351                                                   | 33.71854374                                                   | 3757.628054                                                   |
| 0.167610856                                                  | 26.70679128                                                   | 5002.848271                                                   |
| 0.135808328                                                  | 39.86609481                                                   | 10259.57569                                                   |
| 0.23553303                                                   | 28.24686032                                                   | 5288.59201                                                    |
| 0.044219318                                                  | 156.2799847                                                   | 6423.547511                                                   |
| 0.306419576                                                  | 22.99970623                                                   | 5470.983551                                                   |
| 0.654477338                                                  | 20.37882335                                                   | 1967.455607                                                   |
| 0.831789251                                                  | 12.36696928                                                   | 3116.809685                                                   |
| 0.109339239                                                  | 89.7090218                                                    | 4458.208839                                                   |

| log.sigma.5.0.mm.3D_gldm_SmallDependenceLowGrayLevelEmphasis | log.sigma.5.0.mm.3D_gldm_LowGrayLevelEmphasis | log.sigma.5.0.mm.3D_gldzm_DistanceZoneVariabilityNormalized |
|--------------------------------------------------------------|-----------------------------------------------|-------------------------------------------------------------|
| 0.003036404                                                  | 0.009218212                                   | 1                                                           |
| 0.001334783                                                  | 0.004429805                                   | 1                                                           |
| 0.002601414                                                  | 0.008192108                                   | 1                                                           |
| 0.003537886                                                  | 0.015062675                                   | 1                                                           |
| 0.002564926                                                  | 0.018674469                                   | 1                                                           |
| 0.002341393                                                  | 0.013853279                                   | 1                                                           |
| 0.003753819                                                  | 0.043856264                                   | 1                                                           |
| 0.001385251                                                  | 0.007171829                                   | 1                                                           |
| 0.002251988                                                  | 0.007294923                                   | 1                                                           |
| 0.000837513                                                  | 0.002716958                                   | 1                                                           |
| 0.002861332                                                  | 0.022426615                                   | 1                                                           |
| 0.001920261                                                  | 0.006327161                                   | 1                                                           |
| 0.00228167                                                   | 0.011504673                                   | 1                                                           |
| 0.003158921                                                  | 0.015179315                                   | 1                                                           |
| 0.002464045                                                  | 0.006831935                                   | 1                                                           |
| 0.000830538                                                  | 0.005079153                                   | 1                                                           |
| 0.001646698                                                  | 0.005051981                                   | 1                                                           |
| 0.00140843                                                   | 0.006221541                                   | 1                                                           |
| 0.002114812                                                  | 0.006194213                                   | 1                                                           |
| 0.001628032                                                  | 0.009014832                                   | 1                                                           |
| 0.000844375                                                  | 0.003725909                                   | 1                                                           |
| 0.001772003                                                  | 0.006718397                                   | 1                                                           |
| 0.00099247                                                   | 0.00432389                                    | 1                                                           |
| 0.003413283                                                  | 0.017184238                                   | 1                                                           |
| 0.001963984                                                  | 0.010760489                                   | 1                                                           |
| 0.003334616                                                  | 0.007937475                                   | 1                                                           |
| 0.002244194                                                  | 0.007405347                                   | 1                                                           |
| 0.001595572                                                  | 0.005706657                                   | 1                                                           |
| 0.001131503                                                  | 0.003797817                                   | 1                                                           |
| 0.001011795                                                  | 0.003022238                                   | 1                                                           |
| 0.001294913                                                  | 0.005035935                                   | 0.997445726                                                 |
| 0.000860464                                                  | 0.004789345                                   | 0.99823009                                                  |
| 0.000912452                                                  | 0.003003732                                   | 1                                                           |
| 0.004398668                                                  | 0.014040272                                   | 1                                                           |
| 0.004938267                                                  | 0.023870598                                   | 1                                                           |
| 0.001341465                                                  | 0.007800779                                   | 1                                                           |
| 0.000994543                                                  | 0.003996393                                   | 0.997578696                                                 |
| 0.001098485                                                  | 0.005865089                                   | 1                                                           |
| 0.001931173                                                  | 0.009118812                                   | 1                                                           |
| 0.002969143                                                  | 0.014373158                                   | 1                                                           |
| 0.002885204                                                  | 0.010470496                                   | 1                                                           |
| 0.001869997                                                  | 0.009090119                                   | 1                                                           |
| 0.001577953                                                  | 0.005864331                                   | 1                                                           |
| 0.002610121                                                  | 0.011470177                                   | 1                                                           |
| 0.001411418                                                  | 0.004609461                                   | 1                                                           |
| 0.002262704                                                  | 0.014111624                                   | 1                                                           |
| 0.000795806                                                  | 0.00372186                                    | 0.997555016                                                 |
| 0.001873551                                                  | 0.006106709                                   | 1                                                           |
| 0.005105812                                                  | 0.02315082                                    | 1                                                           |
| 0.002249633                                                  | 0.008193499                                   | 1                                                           |
| 0.000693661                                                  | 0.004348772                                   | 1                                                           |
| 0.001082029                                                  | 0.007858945                                   | 1                                                           |
| 0.001271757                                                  | 0.007394124                                   | 1                                                           |
| 0.001576078                                                  | 0.00397772                                    | 1                                                           |
| 0.001427687                                                  | 0.005756715                                   | 1                                                           |
| 0.00183209                                                   | 0.006758297                                   | 1                                                           |
| 0.000854138                                                  | 0.003546821                                   | 0.997297302                                                 |
| 0.001593911                                                  | 0.009875059                                   | 1                                                           |
| 0.001884679                                                  | 0.008707356                                   | 1                                                           |
| 0.002068382                                                  | 0.009780906                                   | 1                                                           |
| 0.001946435                                                  | 0.008744065                                   | 1                                                           |
| 0.00085215                                                   | 0.004060649                                   | 1                                                           |
| 0.001392992                                                  | 0.004793221                                   | 1                                                           |
| 0.003553504                                                  | 0.012906076                                   | 1                                                           |
| 0.00436434                                                   | 0.009229364                                   | 1                                                           |
| 0.00391817                                                   | 0.018732932                                   | 1                                                           |
| 0.002145357                                                  | 0.018388129                                   | 1                                                           |
| 0.002275994                                                  | 0.010954309                                   | 1                                                           |
| 0.002019767                                                  | 0.007860885                                   | 1                                                           |
| 0.001390432                                                  | 0.004982372                                   | 1                                                           |
| 0.001584746                                                  | 0.006073252                                   | 1                                                           |
| 0.002373933                                                  | 0.009768981                                   | 1                                                           |
| 0.000865734                                                  | 0.003819459                                   | 1                                                           |
| 0.000930457                                                  | 0.004150422                                   | 0.992914173                                                 |
| 0.001189192                                                  | 0.00506771                                    | 1                                                           |
| 0.001434303                                                  | 0.005092852                                   | 1                                                           |
| 0.001627874                                                  | 0.006853711                                   | 1                                                           |
| 0.001812791                                                  | 0.010081728                                   | 1                                                           |
| 0.001441834                                                  | 0.005623288                                   | 1                                                           |
| 0.001157836                                                  | 0.004723317                                   | 1                                                           |
| 0.001276287                                                  | 0.002903565                                   | 1                                                           |
| 0.001107975                                                  | 0.004422498                                   | 1                                                           |
| 0.001151407                                                  | 0.004023594                                   | 1                                                           |
| 0.003457736                                                  | 0.020391639                                   | 1                                                           |
| 0.001207039                                                  | 0.005484688                                   | 0.99746515                                                  |
| 0.002640747                                                  | 0.014827556                                   | 1                                                           |
| 0.002134238                                                  | 0.006376315                                   | 1                                                           |
| 0.002368817                                                  | 0.011912715                                   | 1                                                           |
| 0.011619746                                                  | 0.025006577                                   | 1                                                           |
| 0.004482423                                                  | 0.024333136                                   | 1                                                           |
| 0.001218638                                                  | 0.004774411                                   | 1                                                           |
| 0.00373115                                                   | 0.010575171                                   | 1                                                           |
| 0.001960536                                                  | 0.009568385                                   | 1                                                           |
| 0.000886201                                                  | 0.004773823                                   | 1                                                           |
| 0.001582757                                                  | 0.008924682                                   | 1                                                           |
| 0.002710379                                                  | 0.005406882                                   | 1                                                           |
| 0.001913921                                                  | 0.008634243                                   | 1                                                           |
| 0.005906262                                                  | 0.02524147                                    | 1                                                           |
| 0.003931487                                                  | 0.019450353                                   | 1                                                           |
| 0.002494374                                                  | 0.009754398                                   | 0.99530519                                                  |

| log.sigma.5.0.mm.3D_gldzm_LowIntensityEmphasis | log.sigma.5.0.mm.3D_gldzm_LargeDistanceEmphasis | log.sigma.5.0.mm.3D_gldzm_HighIntensitySmallDistanceEmphasis |
|------------------------------------------------|-------------------------------------------------|--------------------------------------------------------------|
| 0.01299379                                     | 1                                               | 263.191358                                                   |
| 0.008201041                                    | 1                                               | 377.0674157                                                  |
| 0.013315676                                    | 1                                               | 215.8015267                                                  |
| 0.022000644                                    | 1                                               | 157.7404063                                                  |
| 0.019166875                                    | 1                                               | 168.1620112                                                  |
| 0.020020989                                    | 1                                               | 154.5668203                                                  |
| 0.033392667                                    | 1                                               | 85.90298507                                                  |
| 0.009983244                                    | 1                                               | 307.3105413                                                  |
| 0.010373859                                    | 1                                               | 231.4123711                                                  |
| 0.004147864                                    | 1                                               | 560.8323944                                                  |
| 0.032281539                                    | 1                                               | 94.93087558                                                  |
| 0.009317197                                    | 1                                               | 260.9143577                                                  |
| 0.017738055                                    | 1                                               | 159.8968825                                                  |
| 0.020769585                                    | 1                                               | 127.3068493                                                  |
| 0.010518243                                    | 1                                               | 276.7005076                                                  |
| 0.005947281                                    | 1                                               | 375.0176056                                                  |
| 0.009603069                                    | 1                                               | 339.164557                                                   |
| 0.008708572                                    | 1                                               | 266.875                                                      |
| 0.010454606                                    | 1                                               | 234.036                                                      |
| 0.013197725                                    | 1                                               | 243.4244306                                                  |
| 0.005398523                                    | 1                                               | 354.8033708                                                  |
| 0.010164689                                    | 1                                               | 269.1617312                                                  |
| 0.005827028                                    | 1                                               | 373.4575243                                                  |
| 0.020704238                                    | 1                                               | 188.7627119                                                  |
| 0.01098705                                     | 1                                               | 214.0031397                                                  |
| 0.014024588                                    | 1                                               | 285.3697479                                                  |
| 0.010886403                                    | 1                                               | 222.1111111                                                  |
| 0.007698982                                    | 1                                               | 258.4444444                                                  |
| 0.007080732                                    | 1                                               | 373.3902848                                                  |
| 0.004931009                                    | 1                                               | 440.0998613                                                  |
| 0.007974996                                    | 1.003836317                                     | 315.476023                                                   |
| 0.005210275                                    | 1.002657219                                     | 383.9904783                                                  |
| 0.005985802                                    | 1                                               | 622.881549                                                   |
| 0.020540865                                    | 1                                               | 170.6865672                                                  |
| 0.034450156                                    | 1                                               | 115.0166667                                                  |
| 0.011341959                                    | 1                                               | 201.2515856                                                  |
| 0.005696289                                    | 1.003636364                                     | 441.7818182                                                  |
| 0.008966872                                    | 1                                               | 245.6785714                                                  |
| 0.017636943                                    | 1                                               | 180.3426966                                                  |
| 0.018617373                                    | 1                                               | 160.972028                                                   |
| 0.016293667                                    | 1                                               | 150.0538462                                                  |
| 0.012119075                                    | 1                                               | 179.4523077                                                  |
| 0.013132457                                    | 1                                               | 252.237467                                                   |
| 0.016330025                                    | 1                                               | 188.9505814                                                  |
| 0.007860336                                    | 1                                               | 354.380109                                                   |
| 0.016783741                                    | 1                                               | 155.096828                                                   |
| 0.004952812                                    | 1.003671971                                     | 456.6058752                                                  |
| 0.013943537                                    | 1                                               | 244.2025316                                                  |
| 0.026276928                                    | 1                                               | 114.5203252                                                  |
| 0.013252818                                    | 1                                               | 238.2713568                                                  |
| 0.006556691                                    | 1                                               | 364.0566372                                                  |
| 0.016593804                                    | 1                                               | 214.1308901                                                  |
| 0.009456167                                    | 1                                               | 241.479927                                                   |
| 0.008443292                                    | 1                                               | 374.9521739                                                  |
| 0.00795391                                     | 1                                               | 265.491206                                                   |
| 0.009634375                                    | 1                                               | 313.4730679                                                  |
| 0.005095857                                    | 1.00405954                                      | 488.1948579                                                  |
| 0.012865693                                    | 1                                               | 214.7163743                                                  |
| 0.013464802                                    | 1                                               | 214.5313653                                                  |
| 0.021715402                                    | 1                                               | 124.2551724                                                  |
| 0.011274723                                    | 1                                               | 204.7814208                                                  |
| 0.006365007                                    | 1                                               | 367.6739368                                                  |
| 0.00781016                                     | 1                                               | 312.8454746                                                  |
| 0.018830352                                    | 1                                               | 150.8017241                                                  |
| 0.015837362                                    | 1                                               | 188.2234637                                                  |
| 0.019514658                                    | 1                                               | 166.810585                                                   |
| 0.016780373                                    | 1                                               | 214.1485149                                                  |
| 0.014598425                                    | 1                                               | 213.5987749                                                  |
| 0.01404447                                     | 1                                               | 182.902439                                                   |
| 0.007827699                                    | 1                                               | 353.3917323                                                  |
| 0.007146244                                    | 1                                               | 365.2892483                                                  |
| 0.017436091                                    | 1                                               | 189.7009346                                                  |
| 0.004650846                                    | 1                                               | 429.2971014                                                  |
| 0.006018985                                    | 1.010666667                                     | 312.0851111                                                  |
| 0.006622129                                    | 1                                               | 374.462845                                                   |
| 0.008039205                                    | 1                                               | 329.8360324                                                  |
| 0.013145812                                    | 1                                               | 203.2063037                                                  |
| 0.013273645                                    | 1                                               | 221.6830189                                                  |
| 0.008930164                                    | 1                                               | 256.8267327                                                  |
| 0.008078501                                    | 1                                               | 315.6315087                                                  |
| 0.006207321                                    | 1                                               | 580.7359736                                                  |
| 0.006516753                                    | 1                                               | 374.2252836                                                  |
| 0.006437025                                    | 1                                               | 412.1565558                                                  |
| 0.031847941                                    | 1                                               | 89.08860759                                                  |
| 0.007778871                                    | 1.003807107                                     | 340.2449239                                                  |
| 0.019000873                                    | 1                                               | 155.6892857                                                  |
| 0.010206298                                    | 1                                               | 310.1675978                                                  |
| 0.016914306                                    | 1                                               | 148.6861472                                                  |
| 0.055934038                                    | 1                                               | 61.57777778                                                  |
| 0.030176927                                    | 1                                               | 114.6451613                                                  |
| 0.006382761                                    | 1                                               | 308.8542636                                                  |
| 0.018091682                                    | 1                                               | 180.1377953                                                  |
| 0.014464163                                    | 1                                               | 165.6228956                                                  |
| 0.007567826                                    | 1                                               | 312.5784148                                                  |
| 0.010898658                                    | 1                                               | 184.7568238                                                  |
| 0.007903661                                    | 1                                               | 494.7748538                                                  |
| 0.01412614                                     | 1                                               | 178.8918919                                                  |
| 0.029568621                                    | 1                                               | 108.9484536                                                  |
| 0.027655987                                    | 1                                               | 102.3285714                                                  |
| 0.010110096                                    | 1.007058824                                     | 309.9864706                                                  |

| log.sigma.5.0.mm.3D_gldzm_LowIntensityLargeDistanceEmphasis | log.sigma.5.0.mm.3D_gldzm_HighIntensityEmphasis | log.sigma.5.0.mm.3D_gldzm_DistanceZoneVariability | log.sigma.5.0.mm.3D_gldzm_ZonePercentage |
|-------------------------------------------------------------|-------------------------------------------------|---------------------------------------------------|------------------------------------------|
| 0.01299379                                                  | 263.191358                                      | 324                                               | 0.269326683                              |
| 0.008201041                                                 | 377.0674157                                     | 356                                               | 0.178                                    |
| 0.013315676                                                 | 215.8015267                                     | 262                                               | 0.234347048                              |
| 0.022000644                                                 | 157.7404063                                     | 443                                               | 0.18059519                               |
| 0.019166875                                                 | 168.1620112                                     | 179                                               | 0.1886196                                |
| 0.020020989                                                 | 154.5668203                                     | 217                                               | 0.132478632                              |
| 0.033392667                                                 | 85.90298507                                     | 134                                               | 0.126773888                              |
| 0.009983244                                                 | 307.3105413                                     | 351                                               | 0.194459834                              |
| 0.010373859                                                 | 231.4123711                                     | 485                                               | 0.239268857                              |
| 0.004147864                                                 | 560.8323944                                     | 710                                               | 0.236430236                              |
| 0.032281539                                                 | 94.93087558                                     | 217                                               | 0.120088545                              |
| 0.009317197                                                 | 260.9143577                                     | 397                                               | 0.235608309                              |
| 0.017738055                                                 | 159.8968825                                     | 417                                               | 0.142369409                              |
| 0.020769585                                                 | 127.3068493                                     | 365                                               | 0.196447793                              |
| 0.010518243                                                 | 276.7005076                                     | 394                                               | 0.254521964                              |
| 0.005947281                                                 | 375.0176056                                     | 852                                               | 0.20734972                               |
| 0.009603069                                                 | 339.164557                                      | 316                                               | 0.196884735                              |
| 0.008708572                                                 | 266.875                                         | 440                                               | 0.172009382                              |
| 0.010454606                                                 | 234.036                                         | 250                                               | 0.220070423                              |
| 0.013197725                                                 | 243.4244306                                     | 483                                               | 0.166494312                              |
| 0.005398523                                                 | 354.8033708                                     | 1246                                              | 0.179280576                              |
| 0.010164689                                                 | 269.1617312                                     | 439                                               | 0.206977841                              |
| 0.005827028                                                 | 373.4575243                                     | 824                                               | 0.199951468                              |
| 0.020704238                                                 | 188.7627119                                     | 236                                               | 0.229126214                              |
| 0.01098705                                                  | 214.0031397                                     | 637                                               | 0.244623656                              |
| 0.014024588                                                 | 285.3697479                                     | 357                                               | 0.264053254                              |
| 0.010886403                                                 | 222.1111111                                     | 513                                               | 0.23202171                               |
| 0.007698982                                                 | 258.4444444                                     | 828                                               | 0.246795827                              |
| 0.007080732                                                 | 373.3902848                                     | 597                                               | 0.175639894                              |
| 0.004931009                                                 | 440.0998613                                     | 721                                               | 0.228236784                              |
| 0.007982248                                                 | 315.983376                                      | 780.0025575                                       | 0.188797682                              |
| 0.0052163                                                   | 384.2834367                                     | 1127.001771                                       | 0.2258                                   |
| 0.005985802                                                 | 622.881549                                      | 439                                               | 0.17344923                               |
| 0.020540865                                                 | 170.6865672                                     | 134                                               | 0.278586279                              |
| 0.034450156                                                 | 115.0166667                                     | 180                                               | 0.202702703                              |
| 0.011341959                                                 | 201.2515856                                     | 473                                               | 0.147031396                              |
| 0.00569984                                                  | 442.7127273                                     | 823.0024242                                       | 0.231157187                              |
| 0.008966872                                                 | 245.6785714                                     | 504                                               | 0.148628723                              |
| 0.017636943                                                 | 180.3426966                                     | 178                                               | 0.119946092                              |
| 0.018617373                                                 | 160.972028                                      | 286                                               | 0.174816626                              |
| 0.016293667                                                 | 150.0538462                                     | 260                                               | 0.197568389                              |
| 0.012119075                                                 | 179.4523077                                     | 325                                               | 0.168219462                              |
| 0.013132457                                                 | 252.237467                                      | 379                                               | 0.125206475                              |
| 0.016330025                                                 | 188.9505814                                     | 344                                               | 0.182590234                              |
| 0.007860336                                                 | 354.380109                                      | 734                                               | 0.210074413                              |
| 0.016783741                                                 | 155.096828                                      | 599                                               | 0.167552448                              |
| 0.004964145                                                 | 456.9033048                                     | 815.0024448                                       | 0.221649485                              |
| 0.013943537                                                 | 244.2025316                                     | 237                                               | 0.156332454                              |
| 0.026276928                                                 | 114.5203252                                     | 123                                               | 0.218085106                              |
| 0.013252818                                                 | 238.2713568                                     | 199                                               | 0.182568807                              |
| 0.006556691                                                 | 364.0566372                                     | 565                                               | 0.141817269                              |
| 0.016593804                                                 | 214.1308901                                     | 191                                               | 0.097648262                              |
| 0.009456167                                                 | 241.479927                                      | 548                                               | 0.144324467                              |
| 0.008443292                                                 | 374.9521739                                     | 230                                               | 0.196413322                              |
| 0.00795391                                                  | 265.491206                                      | 796                                               | 0.202184404                              |
| 0.009634375                                                 | 313.4730679                                     | 427                                               | 0.226165254                              |
| 0.005106006                                                 | 488.6008119                                     | 737.0027064                                       | 0.22537359                               |
| 0.012865693                                                 | 214.7163743                                     | 342                                               | 0.140625                                 |
| 0.013464802                                                 | 214.5313653                                     | 271                                               | 0.197521866                              |
| 0.021715402                                                 | 124.2551724                                     | 145                                               | 0.103202847                              |
| 0.011274723                                                 | 204.7814208                                     | 549                                               | 0.1866712                                |
| 0.006365007                                                 | 367.6739368                                     | 917                                               | 0.167122289                              |
| 0.00781016                                                  | 312.8454746                                     | 453                                               | 0.199471598                              |
| 0.018830352                                                 | 150.8017241                                     | 464                                               | 0.248394004                              |
| 0.015837362                                                 | 188.2234637                                     | 179                                               | 0.303389831                              |
| 0.019514658                                                 | 166.810585                                      | 359                                               | 0.232663642                              |
| 0.016780373                                                 | 214.1485149                                     | 202                                               | 0.190926276                              |
| 0.014598425                                                 | 213.5987749                                     | 653                                               | 0.18311834                               |
| 0.01404447                                                  | 182.902439                                      | 205                                               | 0.158546017                              |
| 0.007827699                                                 | 353.3917323                                     | 508                                               | 0.202632629                              |
| 0.007146244                                                 | 365.2892483                                     | 1051                                              | 0.275997899                              |
| 0.017436091                                                 | 189.7009346                                     | 321                                               | 0.155749636                              |
| 0.004650846                                                 | 429.2971014                                     | 966                                               | 0.206454371                              |
| 0.006063681                                                 | 312.7564444                                     | 1117.028444                                       | 0.172784519                              |
| 0.006622129                                                 | 374.462845                                      | 942                                               | 0.221022994                              |
| 0.008039205                                                 | 329.8360324                                     | 494                                               | 0.211926212                              |
| 0.013145812                                                 | 203.2063037                                     | 349                                               | 0.148195329                              |
| 0.013273645                                                 | 221.6830189                                     | 265                                               | 0.194996321                              |
| 0.008930164                                                 | 256.8267327                                     | 606                                               | 0.184981685                              |
| 0.008078501                                                 | 315.6315087                                     | 749                                               | 0.168201213                              |
| 0.006207321                                                 | 580.7359736                                     | 303                                               | 0.22246696                               |
| 0.006516753                                                 | 374.2252836                                     | 617                                               | 0.232216786                              |
| 0.006437025                                                 | 412.1565558                                     | 511                                               | 0.2065481                                |
| 0.031847941                                                 | 89.08860759                                     | 79                                                | 0.151051625                              |
| 0.007816942                                                 | 340.3401015                                     | 786.0025381                                       | 0.204039358                              |
| 0.019000873                                                 | 155.6892857                                     | 560                                               | 0.161197467                              |
| 0.010206298                                                 | 310.1675978                                     | 358                                               | 0.25070028                               |
| 0.016914306                                                 | 148.6861472                                     | 462                                               | 0.151823858                              |
| 0.055934038                                                 | 61.57777778                                     | 90                                                | 0.218978102                              |
| 0.030176927                                                 | 114.6451613                                     | 124                                               | 0.214532872                              |
| 0.006382761                                                 | 308.8542636                                     | 645                                               | 0.200872002                              |
| 0.018091682                                                 | 180.1377953                                     | 254                                               | 0.229864253                              |
| 0.014464163                                                 | 165.6228956                                     | 297                                               | 0.190140845                              |
| 0.007567826                                                 | 312.5784148                                     | 593                                               | 0.136227889                              |
| 0.010898658                                                 | 184.7568238                                     | 806                                               | 0.171270718                              |
| 0.007903661                                                 | 494.7748538                                     | 342                                               | 0.386877828                              |
| 0.01412614                                                  | 178.8918919                                     | 259                                               | 0.146908678                              |
| 0.029568621                                                 | 108.9484536                                     | 97                                                | 0.226635514                              |
| 0.027655987                                                 | 102.3285714                                     | 140                                               | 0.157657658                              |
| 0.010197242                                                 | 310.1294118                                     | 423.0047059                                       | 0.368284229                              |

| log.sigma.5.0.mm.3D_gldzm_IntensityVariabilityNormalized | log.sigma.5.0.mm.3D_gldzm_LowIntensitySmallDistanceEmphasis | log.sigma.5.0.mm.3D_gldzm_IntensityVariability |
|----------------------------------------------------------|-------------------------------------------------------------|------------------------------------------------|
| 0.053974242                                              | 0.01299379                                                  | 17.48765432                                    |
| 0.060740437                                              | 0.008201041                                                 | 21.62359551                                    |
| 0.06010722                                               | 0.013315676                                                 | 15.7480916                                     |
| 0.061019419                                              | 0.022000644                                                 | 27.03160271                                    |
| 0.069941637                                              | 0.019166875                                                 | 12.51955307                                    |
| 0.062753509                                              | 0.020020989                                                 | 13.61751152                                    |
| 0.104143462                                              | 0.033392667                                                 | 13.95522388                                    |
| 0.054260923                                              | 0.009983244                                                 | 19.04558405                                    |
| 0.057549155                                              | 0.010373859                                                 | 27.91134021                                    |
| 0.052612577                                              | 0.004147864                                                 | 37.35492958                                    |
| 0.077618977                                              | 0.032281539                                                 | 16.84331797                                    |
| 0.05822637                                               | 0.009317197                                                 | 23.11586902                                    |
| 0.061734785                                              | 0.017738055                                                 | 25.74340528                                    |
| 0.06889848                                               | 0.020769585                                                 | 25.14794521                                    |
| 0.050194543                                              | 0.010518243                                                 | 19.77664975                                    |
| 0.052064736                                              | 0.005947281                                                 | 44.35915493                                    |
| 0.052014901                                              | 0.009603069                                                 | 16.43670886                                    |
| 0.060743802                                              | 0.008708572                                                 | 26.72727273                                    |
| 0.07248                                                  | 0.010454606                                                 | 18.12                                          |
| 0.059175529                                              | 0.013197725                                                 | 28.58178054                                    |
| 0.057131778                                              | 0.005398523                                                 | 71.18619583                                    |
| 0.057341961                                              | 0.010164689                                                 | 25.17312073                                    |
| 0.052582124                                              | 0.005827028                                                 | 43.3276699                                     |
| 0.064062051                                              | 0.020704238                                                 | 15.11864407                                    |
| 0.058858612                                              | 0.01098705                                                  | 37.49293564                                    |
| 0.047069808                                              | 0.014024588                                                 | 16.80392157                                    |
| 0.056461817                                              | 0.010886403                                                 | 28.96491228                                    |
| 0.062341011                                              | 0.007698982                                                 | 51.61835749                                    |
| 0.051258526                                              | 0.007080732                                                 | 30.60134003                                    |
| 0.049013064                                              | 0.004931009                                                 | 35.33841886                                    |
| 0.05352202                                               | 0.007973183                                                 | 41.85421995                                    |
| 0.055839252                                              | 0.005208768                                                 | 63.0425155                                     |
| 0.049050181                                              | 0.005985802                                                 | 21.53302961                                    |
| 0.063934061                                              | 0.020540865                                                 | 8.567164179                                    |
| 0.068641975                                              | 0.034450156                                                 | 12.35555556                                    |
| 0.065986081                                              | 0.011341959                                                 | 31.21141649                                    |
| 0.04441359                                               | 0.005695401                                                 | 36.64121212                                    |
| 0.064633724                                              | 0.008966872                                                 | 32.57539683                                    |
| 0.069372554                                              | 0.017636943                                                 | 12.34831461                                    |
| 0.065577779                                              | 0.018617373                                                 | 18.75524476                                    |
| 0.070236686                                              | 0.016293667                                                 | 18.26153846                                    |
| 0.070655621                                              | 0.012119075                                                 | 22.96307692                                    |
| 0.06522511                                               | 0.013132457                                                 | 24.72031662                                    |
| 0.058443753                                              | 0.016330025                                                 | 20.10465116                                    |
| 0.044873746                                              | 0.007860336                                                 | 32.9373297                                     |
| 0.066357117                                              | 0.016783741                                                 | 39.74791319                                    |
| 0.053212862                                              | 0.004949978                                                 | 43.4749082                                     |
| 0.053819723                                              | 0.013943537                                                 | 12.75527426                                    |
| 0.088373323                                              | 0.026276928                                                 | 10.8699187                                     |
| 0.057296533                                              | 0.013252818                                                 | 11.40201005                                    |
| 0.057128984                                              | 0.006556691                                                 | 32.27787611                                    |
| 0.059949015                                              | 0.016593804                                                 | 11.45026178                                    |
| 0.061231286                                              | 0.009456167                                                 | 33.55474453                                    |
| 0.059508507                                              | 0.008443292                                                 | 13.68695652                                    |
| 0.056415873                                              | 0.00795391                                                  | 44.90703518                                    |
| 0.047436228                                              | 0.009634375                                                 | 20.25526932                                    |
| 0.050283728                                              | 0.00509332                                                  | 37.15967524                                    |
| 0.056581512                                              | 0.012865693                                                 | 19.35087719                                    |
| 0.059571629                                              | 0.013464802                                                 | 16.14391144                                    |
| 0.080808561                                              | 0.021715402                                                 | 11.71724138                                    |
| 0.062053543                                              | 0.011274723                                                 | 34.06739526                                    |
| 0.051028138                                              | 0.006365007                                                 | 46.79280262                                    |
| 0.058706002                                              | 0.00781016                                                  | 26.59381898                                    |
| 0.063113109                                              | 0.018830352                                                 | 29.28448276                                    |
| 0.065697076                                              | 0.015837362                                                 | 11.75977654                                    |
| 0.063772007                                              | 0.019514658                                                 | 22.89415042                                    |
| 0.057200274                                              | 0.016780373                                                 | 11.55445545                                    |
| 0.054874545                                              | 0.014598425                                                 | 35.8330781                                     |
| 0.071314694                                              | 0.01404447                                                  | 14.6195122                                     |
| 0.050677351                                              | 0.007827699                                                 | 25.74409449                                    |
| 0.047266841                                              | 0.007146244                                                 | 49.67745005                                    |
| 0.063207849                                              | 0.017436091                                                 | 20.28971963                                    |
| 0.05739662                                               | 0.004650846                                                 | 55.44513458                                    |
| 0.061140543                                              | 0.006007811                                                 | 68.78311111                                    |
| 0.048228236                                              | 0.006622129                                                 | 45.43099788                                    |
| 0.05160714                                               | 0.008039205                                                 | 25.49392713                                    |
| 0.058644839                                              | 0.013145812                                                 | 20.46704871                                    |
| 0.064293343                                              | 0.013273645                                                 | 17.03773585                                    |
| 0.058213247                                              | 0.008930164                                                 | 35.27722772                                    |
| 0.053185288                                              | 0.008078501                                                 | 39.83578104                                    |
| 0.044734176                                              | 0.006207321                                                 | 13.55445545                                    |
| 0.047069918                                              | 0.006516753                                                 | 29.04213938                                    |
| 0.053205219                                              | 0.006437025                                                 | 27.18786693                                    |
| 0.0985419                                                | 0.031847941                                                 | 7.784810127                                    |
| 0.05736105                                               | 0.007769353                                                 | 45.20050761                                    |
| 0.061913265                                              | 0.019000873                                                 | 34.67142857                                    |
| 0.048172654                                              | 0.010206298                                                 | 17.24581006                                    |
| 0.073490002                                              | 0.016914306                                                 | 33.95238095                                    |
| 0.11382716                                               | 0.055934038                                                 | 10.24444444                                    |
| 0.073491155                                              | 0.030176927                                                 | 9.112903226                                    |
| 0.05877291                                               | 0.006382761                                                 | 37.90852713                                    |
| 0.059520119                                              | 0.018091682                                                 | 15.11811024                                    |
| 0.070752418                                              | 0.014464163                                                 | 21.01346801                                    |
| 0.054619806                                              | 0.007567826                                                 | 32.38954469                                    |
| 0.066751227                                              | 0.010898658                                                 | 53.80148883                                    |
| 0.037960398                                              | 0.007903661                                                 | 12.98245614                                    |
| 0.076251099                                              | 0.01412614                                                  | 19.74903475                                    |
| 0.087682007                                              | 0.029568621                                                 | 8.505154639                                    |
| 0.078265306                                              | 0.027655987                                                 | 10.95714286                                    |
| 0.046687889                                              | 0.010088309                                                 | 19.84235294                                    |

| log.sigma.5.0.mm.3D_gldzm_HighIntensityLargeDistanceEmphasis | log.sigma.5.0.mm.3D_gldzm_SmallDistanceEmphasis | log.sigma.5.0.mm.3D_gldzm_SumVariance | log.sigma.5.0.mm.3D_gldzm_Homogeneity1 |
|--------------------------------------------------------------|-------------------------------------------------|---------------------------------------|----------------------------------------|
| 263.191358                                                   | 1                                               | 728.5413701                           | 0.42661616                             |
| 377.0674157                                                  | 1                                               | 1131.104236                           | 0.464814179                            |
| 215.8015267                                                  | 1                                               | 661.7887271                           | 0.4415556                              |
| 157.7404063                                                  | 1                                               | 363.3521952                           | 0.482310857                            |
| 168.1620112                                                  | 1                                               | 362.2538924                           | 0.502927285                            |
| 154.5668203                                                  | 1                                               | 345.6985271                           | 0.512415323                            |
| 85.90298507                                                  | 1                                               | 143.4726339                           | 0.5792656                              |
| 307.3105413                                                  | 1                                               | 905.9949519                           | 0.463224872                            |
| 231.4123711                                                  | 1                                               | 679.7882922                           | 0.461382268                            |
| 560.8323944                                                  | 1                                               | 1849.112604                           | 0.434021516                            |
| 94.93087558                                                  | 1                                               | 223.2145571                           | 0.533471272                            |
| 260.9143577                                                  | 1                                               | 808.1566699                           | 0.445627239                            |
| 159.8968825                                                  | 1                                               | 360.0809873                           | 0.533704391                            |
| 127.3068493                                                  | 1                                               | 356.4737138                           | 0.459138083                            |
| 276.7005076                                                  | 1                                               | 806.5699855                           | 0.436599223                            |
| 375.0176056                                                  | 1                                               | 1138.465361                           | 0.468578816                            |
| 339.164557                                                   | 1                                               | 1079.594951                           | 0.455332221                            |
| 266.875                                                      | 1                                               | 735.9710932                           | 0.495836989                            |
| 234.036                                                      | 1                                               | 744.4006885                           | 0.457168956                            |
| 243.4244306                                                  | 1                                               | 699.3468836                           | 0.489534155                            |
| 354.8033708                                                  | 1                                               | 1139.879202                           | 0.463297207                            |
| 269.1617312                                                  | 1                                               | 759.9173944                           | 0.461130255                            |
| 373.4575243                                                  | 1                                               | 1048.546912                           | 0.453424482                            |
| 188.7627119                                                  | 1                                               | 448.676894                            | 0.454576658                            |
| 214.0031397                                                  | 1                                               | 650.0602505                           | 0.43033339                             |
| 285.3697479                                                  | 1                                               | 801.3551684                           | 0.4228861                              |
| 222.1111111                                                  | 1                                               | 737.5820074                           | 0.481641343                            |
| 258.4444444                                                  | 1                                               | 884.8332361                           | 0.423047752                            |
| 373.3902848                                                  | 1                                               | 1268.197022                           | 0.460755952                            |
| 440.0998613                                                  | 1                                               | 1530.77142                            | 0.457448072                            |
| 318.0127877                                                  | 0.999040921                                     | 1015.585152                           | 0.468833963                            |
| 385.4552702                                                  | 0.999335695                                     | 1241.395652                           | 0.457436739                            |
| 622.881549                                                   | 1                                               | 1977.254332                           | 0.488891484                            |
| 170.6865672                                                  | 1                                               | 490.694122                            | 0.453199073                            |
| 115.0166667                                                  | 1                                               | 293.1674492                           | 0.484490978                            |
| 201.2515856                                                  | 1                                               | 558.147174                            | 0.492334084                            |
| 446.4363636                                                  | 0.999090909                                     | 1420.68627                            | 0.424994267                            |
| 245.6785714                                                  | 1                                               | 754.7581267                           | 0.489512869                            |
| 180.3426966                                                  | 1                                               | 453.8038536                           | 0.553362188                            |
| 160.972028                                                   | 1                                               | 349.6082323                           | 0.510535186                            |
| 150.0538462                                                  | 1                                               | 432.9782495                           | 0.472370362                            |
| 179.4523077                                                  | 1                                               | 449.6938785                           | 0.492136616                            |
| 252.237467                                                   | 1                                               | 771.6609927                           | 0.50994957                             |
| 188.9505814                                                  | 1                                               | 442.7091154                           | 0.49822192                             |
| 354.380109                                                   | 1                                               | 1221.354464                           | 0.450994016                            |
| 155.096828                                                   | 1                                               | 444.1546976                           | 0.471702157                            |
| 458.0930233                                                  | 0.999082007                                     | 1392.90397                            | 0.44992041                             |
| 244.2025316                                                  | 1                                               | 893.6563908                           | 0.501519454                            |
| 114.5203252                                                  | 1                                               | 243.8465342                           | 0.489818812                            |
| 238.2713568                                                  | 1                                               | 590.5171527                           | 0.486069012                            |
| 364.0566372                                                  | 1                                               | 1117.442961                           | 0.514948471                            |
| 214.1308901                                                  | 1                                               | 632.2829501                           | 0.556378221                            |
| 241.479927                                                   | 1                                               | 603.9118954                           | 0.503677944                            |
| 374.9521739                                                  | 1                                               | 1295.195928                           | 0.452488709                            |
| 265.491206                                                   | 1                                               | 856.2888124                           | 0.445671908                            |
| 313.4730679                                                  | 1                                               | 873.7903391                           | 0.432321718                            |
| 490.2246279                                                  | 0.998985115                                     | 1618.030592                           | 0.445636764                            |
| 214.7163743                                                  | 1                                               | 466.9333798                           | 0.552093988                            |
| 214.5313653                                                  | 1                                               | 590.2966873                           | 0.465749266                            |
| 124.2551724                                                  | 1                                               | 409.1661094                           | 0.52532681                             |
| 204.7814208                                                  | 1                                               | 571.4040284                           | 0.49338791                             |
| 367.6739368                                                  | 1                                               | 1163.900136                           | 0.479374478                            |
| 312.8454746                                                  | 1                                               | 964.6307386                           | 0.469401679                            |
| 150.8017241                                                  | 1                                               | 492.5299229                           | 0.41532731                             |
| 188.2234637                                                  | 1                                               | 618.5900642                           | 0.415323228                            |
| 166.810585                                                   | 1                                               | 336.5291823                           | 0.444007688                            |
| 214.1485149                                                  | 1                                               | 413.4077698                           | 0.490630696                            |
| 213.5987749                                                  | 1                                               | 522.9178835                           | 0.462403412                            |
| 182.902439                                                   | 1                                               | 572.3298533                           | 0.479543933                            |
| 353.3917323                                                  | 1                                               | 1023.427406                           | 0.459045776                            |
| 365.2892483                                                  | 1                                               | 1234.313103                           | 0.399601397                            |
| 189.7009346                                                  | 1                                               | 488.0824052                           | 0.500751869                            |
| 429.2971014                                                  | 1                                               | 1318.964349                           | 0.463039961                            |
| 315.4417778                                                  | 0.997333333                                     | 1064.41236                            | 0.462531676                            |
| 374.462845                                                   | 1                                               | 1014.661174                           | 0.447183624                            |
| 329.8360324                                                  | 1                                               | 1026.679276                           | 0.441429507                            |
| 203.2063037                                                  | 1                                               | 676.8212115                           | 0.514919621                            |
| 221.6830189                                                  | 1                                               | 632.7690391                           | 0.460311775                            |
| 256.8267327                                                  | 1                                               | 816.0651354                           | 0.458488605                            |
| 315.6315087                                                  | 1                                               | 1054.011562                           | 0.478193603                            |
| 580.7359736                                                  | 1                                               | 2010.247522                           | 0.451357601                            |
| 374.2252836                                                  | 1                                               | 1192.403413                           | 0.419655362                            |
| 412.1565558                                                  | 1                                               | 1185.155779                           | 0.442038258                            |
| 89.08860759                                                  | 1                                               | 228.2170796                           | 0.553522875                            |
| 340.7208122                                                  | 0.999048223                                     | 1114.814128                           | 0.452267465                            |
| 155.6892857                                                  | 1                                               | 392.0070242                           | 0.503850583                            |
| 310.1675978                                                  | 1                                               | 935.5074384                           | 0.428745358                            |
| 148.6861472                                                  | 1                                               | 381.0218675                           | 0.49320155                             |
| 61.57777778                                                  | 1                                               | 211.3452227                           | 0.478258791                            |
| 114.6451613                                                  | 1                                               | 329.0873532                           | 0.463573705                            |
| 308.8542636                                                  | 1                                               | 882.6255637                           | 0.46954079                             |
| 180.1377953                                                  | 1                                               | 531.5762897                           | 0.446150798                            |
| 165.6228956                                                  | 1                                               | 525.4454141                           | 0.475978546                            |
| 312.5784148                                                  | 1                                               | 944.3205449                           | 0.503626152                            |
| 184.7568238                                                  | 1                                               | 534.7138233                           | 0.487523376                            |
| 494.7748538                                                  | 1                                               | 1686.318809                           | 0.328755681                            |
| 178.8918919                                                  | 1                                               | 471.2761388                           | 0.523283524                            |
| 108.9484536                                                  | 1                                               | 258.0987801                           | 0.46505285                             |
| 102.3285714                                                  | 1                                               | 239.9982516                           | 0.539721929                            |
| 310.7011765                                                  | 0.998235294                                     | 1033.58961                            | 0.362344147                            |

| log.sigma.5.0.mm.3D_glc_m_Homogeneity2 | log.sigma.5.0.mm.3D_glc_m_ClusterShade | log.sigma.5.0.mm.3D_glc_m_MaximumProbability | log.sigma.5.0.mm.3D_glc_m_Idmn | log.sigma.5.0.mm.3D_glc_m_SumVariance2 |
|----------------------------------------|----------------------------------------|----------------------------------------------|--------------------------------|----------------------------------------|
| 0.351749252                            | -41.14717845                           | 0.020846947                                  | 0.984962822                    | 98.45140966                            |
| 0.395694079                            | 38.93824725                            | 0.029549651                                  | 0.9911998333                   | 62.64630722                            |
| 0.367510495                            | -116.3237763                           | 0.030083846                                  | 0.989778746                    | 65.27846112                            |
| 0.416784827                            | 238.2748477                            | 0.029599935                                  | 0.989787008                    | 61.34840678                            |
| 0.444359686                            | 211.4291364                            | 0.057492564                                  | 0.985262059                    | 63.63818418                            |
| 0.454465615                            | 317.3087124                            | 0.064057709                                  | 0.990660614                    | 56.1014979                             |
| 0.53463674                             | 185.709708                             | 0.094777503                                  | 0.985853244                    | 48.97999852                            |
| 0.394747594                            | 70.08850157                            | 0.030194969                                  | 0.991661168                    | 83.92357094                            |
| 0.392699201                            | 200.0340696                            | 0.037520031                                  | 0.989044315                    | 74.00848954                            |
| 0.357548832                            | -197.0975433                           | 0.020992647                                  | 0.993511931                    | 83.88017318                            |
| 0.480520557                            | 113.9550882                            | 0.054150076                                  | 0.986680815                    | 37.91468333                            |
| 0.371391237                            | -73.17134995                           | 0.022695775                                  | 0.989763646                    | 53.74586202                            |
| 0.479327245                            | 145.5688412                            | 0.065278502                                  | 0.990692359                    | 41.33395774                            |
| 0.387174003                            | -0.94256131                            | 0.025001361                                  | 0.985514463                    | 47.79442618                            |
| 0.36539767                             | 526.7030781                            | 0.02694599                                   | 0.985355085                    | 88.38763138                            |
| 0.39941938                             | -103.2698086                           | 0.056821567                                  | 0.991460416                    | 86.51425216                            |
| 0.383487232                            | -121.1433532                           | 0.03316972                                   | 0.991722285                    | 62.86874592                            |
| 0.435287176                            | 188.8622551                            | 0.035158713                                  | 0.992618152                    | 69.95512989                            |
| 0.38583211                             | -105.5779751                           | 0.02668804                                   | 0.986656491                    | 41.92938659                            |
| 0.426898395                            | -92.75768332                           | 0.034342154                                  | 0.991656037                    | 66.49003186                            |
| 0.394318609                            | -158.0981973                           | 0.026227894                                  | 0.99376561                     | 60.77509465                            |
| 0.391235196                            | 65.6986242                             | 0.02161053                                   | 0.993236678                    | 70.75653541                            |
| 0.38116551                             | 260.7187456                            | 0.025938234                                  | 0.993891021                    | 72.59472574                            |
| 0.382757565                            | -6.938593142                           | 0.03682356                                   | 0.984109529                    | 76.13954609                            |
| 0.352840426                            | -349.9196237                           | 0.022481054                                  | 0.986390391                    | 81.3983014                             |
| 0.34504579                             | 201.5816957                            | 0.024380489                                  | 0.988429824                    | 81.99161686                            |
| 0.415284889                            | 99.7737221                             | 0.023487799                                  | 0.991205973                    | 71.72514097                            |
| 0.343493256                            | -247.4595756                           | 0.018706119                                  | 0.988785887                    | 66.29019977                            |
| 0.391154008                            | -255.2092899                           | 0.03011441                                   | 0.991842731                    | 54.87851088                            |
| 0.388768307                            | -76.47916618                           | 0.028369998                                  | 0.994110286                    | 61.56941361                            |
| 0.400828907                            | -162.0157893                           | 0.023528158                                  | 0.992132243                    | 77.84825252                            |
| 0.387131384                            | -112.9181008                           | 0.024460995                                  | 0.992739401                    | 68.80286179                            |
| 0.425687623                            | -405.8492348                           | 0.04153394                                   | 0.994765359                    | 87.33448692                            |
| 0.382131873                            | 56.15642421                            | 0.042289405                                  | 0.981526231                    | 60.84834808                            |
| 0.420483449                            | 61.25930041                            | 0.043129551                                  | 0.983403393                    | 51.09637231                            |
| 0.429756297                            | 86.53164554                            | 0.035912348                                  | 0.990159802                    | 44.12102493                            |
| 0.347059248                            | 65.84208209                            | 0.022420692                                  | 0.993322079                    | 100.0901791                            |
| 0.425097425                            | -26.98226809                           | 0.035537454                                  | 0.991839358                    | 46.83477659                            |
| 0.505391658                            | 141.5279337                            | 0.052122494                                  | 0.992936272                    | 36.27438958                            |
| 0.452236899                            | 224.8669964                            | 0.053630961                                  | 0.987658892                    | 58.6732046                             |
| 0.404546967                            | 43.63824561                            | 0.038522821                                  | 0.985306022                    | 40.81061953                            |
| 0.428453146                            | 100.6050546                            | 0.041216244                                  | 0.98893078                     | 41.39489391                            |
| 0.45105269                             | 136.7274206                            | 0.039207678                                  | 0.992084248                    | 49.87501753                            |
| 0.438661054                            | 230.3136521                            | 0.05076961                                   | 0.986748452                    | 59.21773832                            |
| 0.383511648                            | -398.7119406                           | 0.035266953                                  | 0.987845014                    | 87.05946898                            |
| 0.402247369                            | -28.72640695                           | 0.018662023                                  | 0.989723938                    | 68.6547897                             |
| 0.377419263                            | -127.1190389                           | 0.022061827                                  | 0.993357028                    | 75.30316802                            |
| 0.443022344                            | -357.9121763                           | 0.04421118                                   | 0.990550159                    | 53.71814743                            |
| 0.427171302                            | 80.517106                              | 0.053949984                                  | 0.978564608                    | 50.41453225                            |
| 0.423330908                            | 253.3151657                            | 0.03703387                                   | 0.990083997                    | 66.30706147                            |
| 0.458069582                            | 168.5272995                            | 0.048254646                                  | 0.994078119                    | 58.72393743                            |
| 0.510294418                            | 48.89238635                            | 0.06925724                                   | 0.992224706                    | 35.24448457                            |
| 0.444533579                            | 257.4615696                            | 0.035748771                                  | 0.992559533                    | 67.60355813                            |
| 0.381618126                            | 62.08030165                            | 0.027149612                                  | 0.989279059                    | 57.03517513                            |
| 0.370850452                            | -64.88785517                           | 0.019458346                                  | 0.988470013                    | 69.68709795                            |
| 0.356171806                            | -45.99154276                           | 0.018596282                                  | 0.989893849                    | 93.62027164                            |
| 0.374079388                            | -203.9616731                           | 0.025265275                                  | 0.992277958                    | 75.55704194                            |
| 0.503872685                            | 416.9371762                            | 0.084289875                                  | 0.992285857                    | 60.40357957                            |
| 0.396525056                            | 84.67118815                            | 0.034656205                                  | 0.989393344                    | 50.32490829                            |
| 0.470208403                            | -20.03156905                           | 0.041944162                                  | 0.98958444                     | 26.64523096                            |
| 0.432294478                            | 141.905078                             | 0.028295333                                  | 0.988870853                    | 76.02839427                            |
| 0.414067458                            | -48.85385361                           | 0.033410174                                  | 0.993778825                    | 64.45212146                            |
| 0.401633632                            | -104.3414517                           | 0.027269425                                  | 0.991917209                    | 57.06519366                            |
| 0.333053694                            | -117.1450639                           | 0.020422322                                  | 0.981616414                    | 62.31061817                            |
| 0.336373075                            | -53.37335468                           | 0.027142151                                  | 0.979805611                    | 45.85828996                            |
| 0.371486815                            | 304.7028302                            | 0.029384171                                  | 0.985984561                    | 72.81648052                            |
| 0.429123487                            | 521.8664692                            | 0.032780365                                  | 0.989550083                    | 92.29714461                            |
| 0.393561348                            | 276.3452594                            | 0.021858662                                  | 0.986821719                    | 84.32125683                            |
| 0.414120262                            | 0.785647583                            | 0.030916963                                  | 0.98754947                     | 48.48345459                            |
| 0.388244341                            | -1.148904915                           | 0.029114906                                  | 0.992435318                    | 78.56372287                            |
| 0.318967522                            | -910.8241347                           | 0.015092296                                  | 0.987950191                    | 117.685192                             |
| 0.441914687                            | 219.1473933                            | 0.045251814                                  | 0.987696839                    | 47.37563634                            |
| 0.393726361                            | -189.8447295                           | 0.03134299                                   | 0.993898996                    | 75.37604512                            |
| 0.392322367                            | -226.6093959                           | 0.026272713                                  | 0.992319697                    | 54.96114117                            |
| 0.374135211                            | 157.7199378                            | 0.019912884                                  | 0.994196951                    | 90.65963422                            |
| 0.36844918                             | -117.546451                            | 0.024703752                                  | 0.992195447                    | 73.31123049                            |
| 0.458875445                            | -65.83385605                           | 0.038821852                                  | 0.991820871                    | 44.79916087                            |
| 0.390521726                            | -50.99334168                           | 0.036390427                                  | 0.986988457                    | 59.31196187                            |
| 0.388437588                            | -130.7838192                           | 0.029686379                                  | 0.990528472                    | 55.70238096                            |
| 0.412551259                            | -274.1337196                           | 0.034411234                                  | 0.99280805                     | 63.73770218                            |
| 0.384860181                            | -385.6191027                           | 0.041447147                                  | 0.991872168                    | 75.9948172                             |
| 0.341316781                            | -138.3085704                           | 0.0221974                                    | 0.991641368                    | 81.60663032                            |
| 0.367485104                            | 229.4317074                            | 0.029476009                                  | 0.993188822                    | 71.17116353                            |
| 0.504074052                            | 43.42942335                            | 0.091205332                                  | 0.979628372                    | 27.67395369                            |
| 0.379495382                            | -307.5227585                           | 0.022781392                                  | 0.992699639                    | 74.08675654                            |
| 0.443538854                            | 253.5193226                            | 0.029483839                                  | 0.990124216                    | 70.5600483                             |
| 0.352602717                            | -85.64924371                           | 0.023659362                                  | 0.989529787                    | 85.74012939                            |
| 0.430249741                            | 75.0519531                             | 0.033672783                                  | 0.987735583                    | 47.08249495                            |
| 0.411392333                            | -25.94114841                           | 0.066025609                                  | 0.967438476                    | 18.13210792                            |
| 0.392481033                            | -15.98833932                           | 0.038016417                                  | 0.9825013                      | 55.59648688                            |
| 0.402840939                            | 183.5059554                            | 0.027602831                                  | 0.991038294                    | 60.97833455                            |
| 0.37185421                             | 98.63273182                            | 0.030327737                                  | 0.986040218                    | 64.19194119                            |
| 0.408121367                            | -81.11258684                           | 0.038036433                                  | 0.988027239                    | 62.64559731                            |
| 0.443118909                            | 13.76300407                            | 0.04036271                                   | 0.994153118                    | 58.10406097                            |
| 0.423454448                            | -31.44662306                           | 0.030565881                                  | 0.989761754                    | 47.92146647                            |
| 0.239155365                            | -958.1475475                           | 0.015611862                                  | 0.983049827                    | 158.2597922                            |
| 0.468462032                            | 116.1878992                            | 0.052338131                                  | 0.990354558                    | 40.04410914                            |
| 0.394734326                            | 32.92931777                            | 0.038588154                                  | 0.979879012                    | 53.04712688                            |
| 0.487223263                            | 109.4985873                            | 0.075924839                                  | 0.986509609                    | 39.17381888                            |
| 0.272663785                            | -48.24727314                           | 0.018409192                                  | 0.986661081                    | 123.2369244                            |

| log.sigma.5.0.mm.3D_glc_m_Contrast | log.sigma.5.0.mm.3D_glc_m_DifferenceEntropy | log.sigma.5.0.mm.3D_glc_m_InverseVariance | log.sigma.5.0.mm.3D_glc_m_Entropy | log.sigma.5.0.mm.3D_glc_m_Dissimilarity |
|------------------------------------|---------------------------------------------|-------------------------------------------|-----------------------------------|-----------------------------------------|
| 11.76088222                        | 2.862650534                                 | 0.353677676                               | 7.655807187                       | 2.489428451                             |
| 7.463546751                        | 2.585004228                                 | 0.386476617                               | 7.141353704                       | 2.014913493                             |
| 8.91210065                         | 2.717620004                                 | 0.35776657                                | 7.262267749                       | 2.252150378                             |
| 6.169957494                        | 2.472136308                                 | 0.40485079                                | 7.074762322                       | 1.835248781                             |
| 7.017435407                        | 2.494406627                                 | 0.405663986                               | 6.664689372                       | 1.848859209                             |
| 5.163936341                        | 2.356376609                                 | 0.423057243                               | 6.648298598                       | 1.650213653                             |
| 3.859403517                        | 2.13417965                                  | 0.416127284                               | 5.788723412                       | 1.352303755                             |
| 8.371025442                        | 2.647645658                                 | 0.384683528                               | 7.38992729                        | 2.084833035                             |
| 9.088912344                        | 2.708101039                                 | 0.375904308                               | 7.323528369                       | 2.15385706                              |
| 9.105796003                        | 2.736632355                                 | 0.353694859                               | 7.642284803                       | 2.282912554                             |
| 4.582328362                        | 2.291527306                                 | 0.430937344                               | 6.447441637                       | 1.534854075                             |
| 8.363167714                        | 2.663322042                                 | 0.365359532                               | 7.221550008                       | 2.168132736                             |
| 4.713001468                        | 2.322934241                                 | 0.417697177                               | 6.592800252                       | 1.549680548                             |
| 6.741196208                        | 2.531195815                                 | 0.383873499                               | 7.03762445                        | 1.977988003                             |
| 14.25422957                        | 2.915561                                    | 0.343000085                               | 7.600193897                       | 2.62044989                              |
| 9.084459487                        | 2.729593409                                 | 0.349960516                               | 7.566343129                       | 2.167246818                             |
| 8.256552801                        | 2.647728594                                 | 0.367050745                               | 7.223215538                       | 2.127746669                             |
| 7.371488548                        | 2.555203593                                 | 0.399040177                               | 7.154865869                       | 1.901014738                             |
| 8.183501751                        | 2.60790121                                  | 0.37425743                                | 6.914361174                       | 2.099114831                             |
| 6.798059635                        | 2.537669582                                 | 0.401064324                               | 7.139597025                       | 1.877045551                             |
| 7.844392906                        | 2.636064289                                 | 0.382309674                               | 7.361880903                       | 2.060028191                             |
| 7.577339973                        | 2.596940774                                 | 0.384248519                               | 7.323345474                       | 2.041039393                             |
| 7.669811228                        | 2.623690843                                 | 0.376940743                               | 7.422441481                       | 2.08008104                              |
| 8.148486505                        | 2.614179058                                 | 0.362858253                               | 7.184960477                       | 2.143574051                             |
| 8.904515002                        | 2.714043401                                 | 0.35252058                                | 7.579104347                       | 2.286905684                             |
| 10.92136011                        | 2.836155055                                 | 0.341160926                               | 7.573910642                       | 2.461683811                             |
| 6.692464515                        | 2.504961357                                 | 0.390023544                               | 7.176376482                       | 1.891466948                             |
| 9.122714164                        | 2.73520873                                  | 0.344870444                               | 7.518363603                       | 2.335546556                             |
| 8.142454717                        | 2.618796033                                 | 0.381888474                               | 7.138072085                       | 2.082006156                             |
| 9.228332356                        | 2.707485587                                 | 0.381726925                               | 7.356755405                       | 2.174817881                             |
| 7.336256096                        | 2.590089752                                 | 0.389541833                               | 7.445336371                       | 1.990702396                             |
| 8.686478486                        | 2.685191855                                 | 0.373256919                               | 7.437869736                       | 2.143572782                             |
| 7.394959286                        | 2.547954468                                 | 0.396480134                               | 7.166454472                       | 1.90878571                              |
| 10.75826623                        | 2.730441279                                 | 0.350247628                               | 6.967615279                       | 2.319868343                             |
| 7.093891886                        | 2.543729451                                 | 0.388542162                               | 6.894782703                       | 1.940771782                             |
| 5.926396881                        | 2.449691865                                 | 0.412437495                               | 6.871289492                       | 1.782216419                             |
| 10.46928713                        | 2.8109959                                   | 0.345422486                               | 7.799039366                       | 2.408165067                             |
| 5.703998333                        | 2.440910816                                 | 0.405181983                               | 6.913398872                       | 1.779247959                             |
| 3.864676241                        | 2.161161485                                 | 0.446074801                               | 6.24393771                        | 1.399965753                             |
| 6.360629222                        | 2.460398383                                 | 0.402862979                               | 6.772717755                       | 1.772893495                             |
| 6.897864652                        | 2.539119246                                 | 0.390322702                               | 6.827335616                       | 1.944343793                             |
| 6.151304259                        | 2.47309616                                  | 0.398098857                               | 6.789206115                       | 1.814451759                             |
| 5.574636258                        | 2.411931487                                 | 0.415251867                               | 6.804009317                       | 1.692476973                             |
| 8.340462236                        | 2.574645446                                 | 0.396908999                               | 6.924874796                       | 1.94748817                              |
| 14.13601358                        | 2.926053742                                 | 0.347700522                               | 7.709967056                       | 2.563353217                             |
| 6.144465993                        | 2.495014062                                 | 0.389694096                               | 7.310247285                       | 1.884812552                             |
| 8.867396547                        | 2.711348207                                 | 0.365345519                               | 7.560479421                       | 2.191107448                             |
| 7.245514098                        | 2.546875943                                 | 0.406495776                               | 6.841967296                       | 1.869176764                             |
| 6.799001964                        | 2.406397326                                 | 0.397749826                               | 6.354656195                       | 1.884472998                             |
| 7.633189658                        | 2.571509048                                 | 0.399048959                               | 7.00636427                        | 1.944635512                             |
| 5.886435205                        | 2.428672626                                 | 0.417255628                               | 6.900950788                       | 1.701515741                             |
| 4.703101193                        | 2.266916834                                 | 0.442368645                               | 6.228652821                       | 1.463415291                             |
| 6.078466264                        | 2.451044115                                 | 0.418451133                               | 7.033829365                       | 1.749989687                             |
| 10.45657596                        | 2.676212647                                 | 0.372215109                               | 7.137219268                       | 2.239682266                             |
| 8.823280642                        | 2.706112535                                 | 0.352498895                               | 7.512825233                       | 2.21433586                              |
| 10.12989272                        | 2.794167739                                 | 0.348845154                               | 7.740742097                       | 2.363084527                             |
| 10.4341812                         | 2.779072862                                 | 0.366550853                               | 7.538519085                       | 2.306530699                             |
| 6.412228652                        | 2.414760602                                 | 0.40981531                                | 6.581968314                       | 1.627204324                             |
| 6.887947645                        | 2.552051654                                 | 0.386776501                               | 6.981209214                       | 1.979083259                             |
| 3.921102904                        | 2.198907059                                 | 0.445680121                               | 6.266060724                       | 1.481286184                             |
| 7.390526291                        | 2.579363739                                 | 0.400072763                               | 7.277023922                       | 1.906141012                             |
| 7.429312852                        | 2.574763657                                 | 0.393756149                               | 7.232312323                       | 1.952876817                             |
| 7.539736823                        | 2.58969367                                  | 0.387920222                               | 7.163695546                       | 2.005842611                             |
| 9.441967533                        | 2.742661808                                 | 0.3320138                                 | 7.426416169                       | 2.39452499                              |
| 11.5424205                         | 2.806122325                                 | 0.334246565                               | 7.051094065                       | 2.54884053                              |
| 9.325317428                        | 2.713866756                                 | 0.370353125                               | 7.290892406                       | 2.242518934                             |
| 7.472816193                        | 2.560039227                                 | 0.400025461                               | 7.137900699                       | 1.923197886                             |
| 8.837721092                        | 2.679516                                    | 0.380091432                               | 7.484388663                       | 2.118716116                             |
| 6.373744829                        | 2.444702325                                 | 0.406640826                               | 6.844510599                       | 1.863205853                             |
| 7.992567207                        | 2.65039731                                  | 0.372245252                               | 7.430760657                       | 2.093745515                             |
| 13.71635637                        | 2.991810836                                 | 0.320480013                               | 8.100666779                       | 2.779047202                             |
| 7.105526561                        | 2.473342022                                 | 0.418206651                               | 6.678945856                       | 1.822649443                             |
| 8.137467112                        | 2.646057808                                 | 0.378758192                               | 7.412297031                       | 2.078356669                             |
| 7.135804506                        | 2.577010363                                 | 0.386015841                               | 7.219803324                       | 1.997946687                             |
| 9.069120609                        | 2.719737175                                 | 0.364467429                               | 7.706379587                       | 2.212500065                             |
| 9.894094725                        | 2.766008794                                 | 0.361825261                               | 7.51600952                        | 2.305219352                             |
| 5.773041943                        | 2.416274148                                 | 0.423899064                               | 6.761751767                       | 1.693894799                             |
| 8.613260952                        | 2.65262294                                  | 0.371360593                               | 7.137008273                       | 2.134865565                             |
| 8.301899505                        | 2.654142123                                 | 0.376850526                               | 7.241498827                       | 2.113330218                             |
| 7.13066467                         | 2.57454578                                  | 0.391889074                               | 7.197068177                       | 1.948638598                             |
| 13.68824378                        | 2.897421019                                 | 0.369246305                               | 7.326342941                       | 2.489899557                             |
| 10.58249403                        | 2.818885782                                 | 0.346381284                               | 7.691928367                       | 2.447151395                             |
| 8.617694186                        | 2.676430606                                 | 0.36972986                                | 7.375233233                       | 2.185875958                             |
| 5.160159164                        | 2.222186492                                 | 0.410415232                               | 5.68534065                        | 1.534801813                             |
| 7.693357587                        | 2.615625406                                 | 0.374038705                               | 7.457347336                       | 2.088743445                             |
| 6.515224903                        | 2.509038574                                 | 0.400422442                               | 7.176915915                       | 1.798885152                             |
| 10.53907608                        | 2.798075062                                 | 0.352707414                               | 7.631655974                       | 2.396872157                             |
| 5.702997909                        | 2.426863837                                 | 0.410637353                               | 6.856487976                       | 1.763191104                             |
| 6.271753321                        | 2.225019872                                 | 0.397388551                               | 5.552328315                       | 1.867755948                             |
| 6.744207668                        | 2.500215027                                 | 0.381509412                               | 6.805328891                       | 1.967470928                             |
| 7.882982112                        | 2.61894493                                  | 0.393656681                               | 7.197847572                       | 2.023170877                             |
| 8.503214926                        | 2.680413241                                 | 0.361358985                               | 7.239160589                       | 2.181148359                             |
| 6.045837153                        | 2.475187819                                 | 0.39454898                                | 6.86528128                        | 1.864266416                             |
| 5.399268026                        | 2.404378011                                 | 0.414801815                               | 6.978173288                       | 1.703728005                             |
| 6.182601421                        | 2.484977742                                 | 0.405199262                               | 7.043070245                       | 1.823137938                             |
| 25.86463073                        | 3.393344995                                 | 0.241523173                               | 8.296586645                       | 3.92191942                              |
| 4.902704099                        | 2.29472104                                  | 0.433500203                               | 6.38405265                        | 1.5845655                               |
| 7.053384621                        | 2.462640085                                 | 0.378054047                               | 6.649135724                       | 1.994960152                             |
| 4.669701333                        | 2.256081178                                 | 0.421526917                               | 6.280965352                       | 1.526746923                             |
| 16.12426293                        | 3.070605364                                 | 0.279368081                               | 8.038589041                       | 3.120962078                             |

| log.sigma.5.0.mm.3D_glcml_DifferenceVariance | log.sigma.5.0.mm.3D_glcml_Idn | log.sigma.5.0.mm.3D_glcml_Idm | log.sigma.5.0.mm.3D_glcml_Correlation | log.sigma.5.0.mm.3D_glcml_Autocorrelation |
|----------------------------------------------|-------------------------------|-------------------------------|---------------------------------------|-------------------------------------------|
| 5.359100871                                  | 0.920853427                   | 0.351749252                   | 0.786424887                           | 251.7385136                               |
| 3.238282822                                  | 0.939590684                   | 0.395694079                   | 0.787254397                           | 367.5306322                               |
| 3.665285674                                  | 0.93137484                    | 0.367510495                   | 0.760301964                           | 229.6710475                               |
| 2.699148738                                  | 0.932542871                   | 0.416784827                   | 0.817529385                           | 138.0425548                               |
| 3.335234623                                  | 0.924729906                   | 0.444359686                   | 0.801820714                           | 135.741542                                |
| 2.337871466                                  | 0.936506061                   | 0.454465615                   | 0.828057204                           | 130.9101477                               |
| 1.823185065                                  | 0.927742999                   | 0.53463674                    | 0.850324547                           | 60.51059499                               |
| 3.889478684                                  | 0.940129276                   | 0.394747594                   | 0.81790951                            | 304.9495731                               |
| 4.321749078                                  | 0.932675728                   | 0.392699201                   | 0.781139106                           | 235.5956732                               |
| 3.744679756                                  | 0.94413325                    | 0.357548832                   | 0.80400834                            | 575.9123498                               |
| 2.137031465                                  | 0.926339741                   | 0.480520557                   | 0.782892778                           | 90.64246691                               |
| 3.475777385                                  | 0.931602319                   | 0.371391237                   | 0.731617088                           | 272.5898186                               |
| 2.231606883                                  | 0.937775383                   | 0.479327245                   | 0.793992725                           | 135.6289314                               |
| 2.706065411                                  | 0.918468364                   | 0.387174003                   | 0.752431536                           | 135.2502267                               |
| 6.851662816                                  | 0.925329032                   | 0.36539767                    | 0.725284754                           | 273.57504                                 |
| 4.174154503                                  | 0.939831946                   | 0.39941938                    | 0.810803027                           | 373.3062135                               |
| 3.538332478                                  | 0.938723135                   | 0.383487232                   | 0.765946144                           | 352.8118835                               |
| 3.593548825                                  | 0.945219142                   | 0.435287176                   | 0.810089355                           | 253.0991032                               |
| 3.476232089                                  | 0.924189427                   | 0.38583211                    | 0.675121237                           | 251.3836868                               |
| 3.163275615                                  | 0.940350026                   | 0.426898395                   | 0.814322184                           | 241.7913661                               |
| 3.454520534                                  | 0.946735126                   | 0.394318609                   | 0.770787329                           | 370.8169928                               |
| 3.248385273                                  | 0.944204236                   | 0.391235196                   | 0.807434946                           | 261.0923415                               |
| 3.210326702                                  | 0.946067696                   | 0.38116551                    | 0.808752858                           | 345.9189448                               |
| 3.182277709                                  | 0.916385446                   | 0.382757565                   | 0.806405703                           | 164.7147502                               |
| 3.470680242                                  | 0.920441329                   | 0.352840426                   | 0.802160546                           | 228.0756971                               |
| 4.633598342                                  | 0.928102684                   | 0.34504579                    | 0.766583683                           | 273.1099803                               |
| 2.904676399                                  | 0.937737549                   | 0.415284889                   | 0.826231629                           | 254.0947421                               |
| 3.499261872                                  | 0.926492822                   | 0.343493256                   | 0.758553813                           | 296.9571449                               |
| 3.590250399                                  | 0.940072877                   | 0.391154008                   | 0.74258338                            | 404.9705757                               |
| 4.325017813                                  | 0.949507136                   | 0.388768307                   | 0.739442445                           | 481.7477638                               |
| 3.258202131                                  | 0.940640473                   | 0.400628907                   | 0.826980937                           | 337.3365797                               |
| 3.918520258                                  | 0.943419544                   | 0.387131384                   | 0.77497889                            | 400.448877                                |
| 3.579578325                                  | 0.953104204                   | 0.425687623                   | 0.844505064                           | 608.8696875                               |
| 4.845016778                                  | 0.915083575                   | 0.382131873                   | 0.698934514                           | 175.7665371                               |
| 3.110578575                                  | 0.917327589                   | 0.420483449                   | 0.758305115                           | 114.3628776                               |
| 2.657541667                                  | 0.934420283                   | 0.429756297                   | 0.760328014                           | 197.0781677                               |
| 4.459206163                                  | 0.944232672                   | 0.347059248                   | 0.811201506                           | 455.9316075                               |
| 2.452154174                                  | 0.938832654                   | 0.425097425                   | 0.782377746                           | 256.4461942                               |
| 1.774384223                                  | 0.94542575                    | 0.505391658                   | 0.805894922                           | 163.4186031                               |
| 2.974950089                                  | 0.930176133                   | 0.452236989                   | 0.8041513                             | 132.4021793                               |
| 2.983684373                                  | 0.920213684                   | 0.404546967                   | 0.709820879                           | 157.688569                                |
| 2.70258294                                   | 0.930839217                   | 0.428453146                   | 0.740137442                           | 163.2433902                               |
| 2.634988292                                  | 0.941926948                   | 0.45105269                    | 0.798260459                           | 261.0436488                               |
| 4.247738046                                  | 0.930362846                   | 0.438661054                   | 0.754375103                           | 161.6072355                               |
| 7.116659137                                  | 0.932880631                   | 0.383511648                   | 0.717703752                           | 395.1835581                               |
| 2.507347704                                  | 0.930558848                   | 0.402247369                   | 0.835511892                           | 165.0019747                               |
| 3.899039781                                  | 0.945079495                   | 0.377419263                   | 0.790197027                           | 445.565498                                |
| 3.626209437                                  | 0.939066623                   | 0.443022344                   | 0.761844695                           | 295.9888797                               |
| 2.735407426                                  | 0.907578439                   | 0.427171302                   | 0.764263334                           | 96.76809558                               |
| 3.714894652                                  | 0.936680306                   | 0.423330908                   | 0.792718298                           | 208.304584                                |
| 2.899760565                                  | 0.950403798                   | 0.458069582                   | 0.817462275                           | 362.5525164                               |
| 2.499040537                                  | 0.945878617                   | 0.510294418                   | 0.763785315                           | 215.8545606                               |
| 2.932895392                                  | 0.944103635                   | 0.444533579                   | 0.834114004                           | 212.7012387                               |
| 4.893705275                                  | 0.934742864                   | 0.381618126                   | 0.698927175                           | 412.939334                                |
| 3.746258966                                  | 0.928122475                   | 0.370850452                   | 0.775291855                           | 289.4172365                               |
| 4.337048772                                  | 0.932684859                   | 0.356171806                   | 0.805390189                           | 296.6003603                               |
| 4.896197617                                  | 0.94277299                    | 0.374079388                   | 0.757853019                           | 508.3603002                               |
| 3.655162918                                  | 0.948654461                   | 0.503872685                   | 0.808570956                           | 168.4206991                               |
| 2.821758014                                  | 0.930199876                   | 0.396525056                   | 0.759023415                           | 207.1692205                               |
| 1.664266956                                  | 0.931241703                   | 0.470208403                   | 0.744341907                           | 148.9473748                               |
| 3.674186655                                  | 0.933487154                   | 0.432294478                   | 0.822312253                           | 203.5341193                               |
| 3.475969866                                  | 0.94812231                    | 0.414067458                   | 0.792247091                           | 377.6277193                               |
| 3.351427007                                  | 0.940311704                   | 0.401633632                   | 0.767550299                           | 319.1661334                               |
| 3.519294681                                  | 0.907117037                   | 0.333053694                   | 0.737223044                           | 178.2574699                               |
| 4.420618287                                  | 0.906596756                   | 0.336373075                   | 0.600078201                           | 173.0939193                               |
| 4.079965544                                  | 0.922510538                   | 0.371486815                   | 0.772970561                           | 128.3455426                               |
| 3.607912535                                  | 0.935193888                   | 0.429123487                   | 0.848912656                           | 154.0356539                               |
| 4.23333861                                   | 0.926728509                   | 0.393561348                   | 0.810090601                           | 188.683835                                |
| 2.627870798                                  | 0.92621499                    | 0.414120262                   | 0.763477763                           | 201.4532348                               |
| 3.455476963                                  | 0.941315535                   | 0.388244341                   | 0.81423541                            | 339.3638367                               |
| 5.712251686                                  | 0.926355486                   | 0.318967522                   | 0.791397343                           | 402.0036875                               |
| 3.59477689                                   | 0.931488698                   | 0.441914687                   | 0.737698047                           | 174.0764142                               |
| 3.657938246                                  | 0.947736584                   | 0.393726361                   | 0.804462373                           | 423.3577091                               |
| 3.033831594                                  | 0.940253362                   | 0.392322367                   | 0.769034398                           | 347.7948779                               |
| 4.035917844                                  | 0.948485102                   | 0.374135211                   | 0.81754574                            | 338.3930803                               |
| 4.38514319                                   | 0.941074987                   | 0.36844918                    | 0.760087484                           | 339.2556668                               |
| 2.802210241                                  | 0.942081574                   | 0.458875445                   | 0.770677851                           | 232.5004506                               |
| 3.769922265                                  | 0.925955034                   | 0.390521726                   | 0.746694143                           | 220.3675045                               |
| 3.636832295                                  | 0.935489451                   | 0.388437588                   | 0.742059393                           | 275.1377543                               |
| 3.205150742                                  | 0.94355412                    | 0.412551259                   | 0.79862397                            | 345.4411629                               |
| 7.238550664                                  | 0.944893091                   | 0.384860181                   | 0.696178964                           | 614.7676319                               |
| 4.361293693                                  | 0.937516427                   | 0.341316781                   | 0.771280613                           | 388.3402553                               |
| 3.705211677                                  | 0.943642829                   | 0.367485104                   | 0.782783648                           | 384.1279817                               |
| 2.365593384                                  | 0.915237074                   | 0.504074052                   | 0.68895187                            | 89.34797035                               |
| 3.149554309                                  | 0.941257467                   | 0.379495382                   | 0.811395094                           | 365.4883814                               |
| 3.203780433                                  | 0.936723177                   | 0.443538854                   | 0.831016904                           | 147.5293692                               |
| 4.554078717                                  | 0.931897048                   | 0.352602717                   | 0.779856551                           | 313.850006                                |
| 2.473728392                                  | 0.926788814                   | 0.430249741                   | 0.78226372                            | 142.8213892                               |
| 1.989053963                                  | 0.884215996                   | 0.411392333                   | 0.498637463                           | 82.15129369                               |
| 2.652224356                                  | 0.91163766                    | 0.392481033                   | 0.782101151                           | 125.9451006                               |
| 3.679455329                                  | 0.938146806                   | 0.402840939                   | 0.771968322                           | 294.9033662                               |
| 3.584954977                                  | 0.921304076                   | 0.37185421                    | 0.765099551                           | 190.1666531                               |
| 2.464425481                                  | 0.925790253                   | 0.408121367                   | 0.751897951                           | 186.9135347                               |
| 2.406355976                                  | 0.948468394                   | 0.443118909                   | 0.829786429                           | 313.7018594                               |
| 2.765529158                                  | 0.933059254                   | 0.423454448                   | 0.771400305                           | 190.9372077                               |
| 9.897270595                                  | 0.911515715                   | 0.239155365                   | 0.721187618                           | 531.1738925                               |
| 2.238546224                                  | 0.936471379                   | 0.468462032                   | 0.781488238                           | 168.6144229                               |
| 2.684754716                                  | 0.906563844                   | 0.394734326                   | 0.761630835                           | 102.2006613                               |
| 2.119882315                                  | 0.92692714                    | 0.487223263                   | 0.787084067                           | 95.88870664                               |
| 5.870093018                                  | 0.919910483                   | 0.272663785                   | 0.768086495                           | 343.2593721                               |

| log.sigma.5.0.mm.3D_glcm_SumEntropy | log.sigma.5.0.mm.3D_glcm_AverageIntensity | log.sigma.5.0.mm.3D_glcm_Energy | log.sigma.5.0.mm.3D_glcm_SumSquares | log.sigma.5.0.mm.3D_glcm_ClusterProminence |
|-------------------------------------|-------------------------------------------|---------------------------------|-------------------------------------|--------------------------------------------|
| 5.235443572                         | 15.20685548                               | 0.006951928                     | 28.07121714                         | 21083.93874                                |
| 4.928681065                         | 18.87694284                               | 0.010681923                     | 17.878565                           | 12740.06559                                |
| 4.941991459                         | 14.69601095                               | 0.00954092                      | 18.73912679                         | 13199.97345                                |
| 4.915281033                         | 11.14623479                               | 0.011049475                     | 16.87959107                         | 10181.36366                                |
| 4.773260605                         | 11.02584747                               | 0.017667521                     | 17.6639049                          | 8993.548313                                |
| 4.724210538                         | 10.8701494                                | 0.01822479                      | 15.31635856                         | 9533.497975                                |
| 4.312158924                         | 7.015247427                               | 0.032867147                     | 13.20985051                         | 4399.325669                                |
| 5.155871767                         | 16.98773442                               | 0.009250406                     | 23.55239345                         | 21560.1477                                 |
| 5.009943937                         | 14.84421689                               | 0.009868519                     | 21.18804312                         | 12130.70232                                |
| 5.196371204                         | 23.6554286                                | 0.007080352                     | 22.8439312                          | 23473.9619                                 |
| 4.532365985                         | 9.071428223                               | 0.018139261                     | 10.62425292                         | 3668.770185                                |
| 4.860043286                         | 16.19142596                               | 0.009675099                     | 15.82784854                         | 10207.48096                                |
| 4.638541345                         | 11.24553598                               | 0.017931046                     | 11.5117398                          | 5233.044355                                |
| 4.790436639                         | 11.17953502                               | 0.010268713                     | 13.6339056                          | 5777.271451                                |
| 5.141446803                         | 16.04652545                               | 0.007908062                     | 26.39486747                         | 23531.99141                                |
| 5.19352619                          | 18.88418477                               | 0.009930593                     | 24.04529603                         | 23912.93704                                |
| 4.947033351                         | 18.47183178                               | 0.01071158                      | 17.9586251                          | 16258.14878                                |
| 5.012037263                         | 15.45744735                               | 0.011250449                     | 19.7619796                          | 13487.27093                                |
| 4.66980501                          | 15.58635372                               | 0.011263281                     | 12.52822209                         | 5137.831959                                |
| 4.967817247                         | 15.08097325                               | 0.011981873                     | 18.55822875                         | 14814.28992                                |
| 4.970243107                         | 18.98749525                               | 0.009572907                     | 17.07972354                         | 13411.35973                                |
| 5.072575335                         | 15.72364158                               | 0.00905995                      | 19.9953837                          | 15461.42181                                |
| 5.074469428                         | 18.22187858                               | 0.008992655                     | 20.1270606                          | 18190.93786                                |
| 5.007192437                         | 12.15294388                               | 0.010347545                     | 21.07200815                         | 13028.72329                                |
| 5.1331472                           | 14.48934826                               | 0.00724867                      | 22.5757041                          | 18014.26093                                |
| 5.138148744                         | 16.03195331                               | 0.008037738                     | 23.78021414                         | 21512.79042                                |
| 5.041497306                         | 15.4428302                                | 0.009249023                     | 19.87451638                         | 11803.55384                                |
| 5.015600858                         | 16.84235218                               | 0.007426908                     | 19.15919157                         | 13027.75525                                |
| 4.830314276                         | 19.91469962                               | 0.011794503                     | 15.82747153                         | 14616.90074                                |
| 4.967243209                         | 21.69495354                               | 0.010216114                     | 17.42223901                         | 14657.99434                                |
| 5.138480199                         | 17.91605956                               | 0.008917796                     | 21.52949039                         | 20291.67844                                |
| 5.021217139                         | 19.68296044                               | 0.008827411                     | 19.33369747                         | 20629.3104                                 |
| 5.060685692                         | 24.2933019                                | 0.012456164                     | 23.54994238                         | 39769.24546                                |
| 4.822348241                         | 12.7754982                                | 0.011399516                     | 17.90165358                         | 7718.557433                                |
| 4.775083172                         | 10.16593993                               | 0.013063909                     | 14.54756605                         | 7234.666236                                |
| 4.716168025                         | 13.69373181                               | 0.013076306                     | 12.51185545                         | 5863.74518                                 |
| 5.302771838                         | 20.88516627                               | 0.00699143                      | 27.33460382                         | 34457.03911                                |
| 4.772524799                         | 15.6904203                                | 0.012645046                     | 13.1497181                          | 7118.483654                                |
| 4.491689909                         | 12.46245881                               | 0.021595326                     | 10.03476646                         | 4350.294601                                |
| 4.79061504                          | 10.92279913                               | 0.015363685                     | 16.25845846                         | 8076.643031                                |
| 4.627402894                         | 12.21481407                               | 0.012443207                     | 11.92712104                         | 3819.946991                                |
| 4.647794137                         | 12.42676                                  | 0.013110012                     | 11.88654954                         | 4265.55186                                 |
| 4.75465746                          | 15.81592057                               | 0.013662967                     | 13.94482155                         | 6518.128062                                |
| 4.821549871                         | 12.20118075                               | 0.014862891                     | 16.88955014                         | 8775.634578                                |
| 5.152077432                         | 19.53698399                               | 0.009117187                     | 25.18038904                         | 27883.96491                                |
| 5.066777849                         | 12.21893975                               | 0.0083708                       | 18.69981392                         | 11948.66889                                |
| 5.123766058                         | 20.76052866                               | 0.008164744                     | 20.79403341                         | 21276.25931                                |
| 4.745408799                         | 16.87529063                               | 0.016047399                     | 15.381645                           | 12169.15444                                |
| 4.627765266                         | 9.262436165                               | 0.017896816                     | 14.30338355                         | 4893.855871                                |
| 4.935482697                         | 13.9333859                                | 0.011764327                     | 18.78321718                         | 11418.76312                                |
| 4.843601157                         | 18.73318308                               | 0.015059397                     | 16.32704702                         | 10454.15768                                |
| 4.425407429                         | 14.429501                                 | 0.025459649                     | 9.98698644                          | 5884.940514                                |
| 4.935815324                         | 14.06087828                               | 0.012176281                     | 18.63117688                         | 10896.84875                                |
| 4.878001394                         | 20.12861141                               | 0.009925591                     | 16.98361474                         | 9298.475631                                |
| 5.071902977                         | 16.59571298                               | 0.007587083                     | 20.01032646                         | 13440.24844                                |
| 5.278757654                         | 16.66917174                               | 0.006794206                     | 26.42239689                         | 25989.44524                                |
| 5.091325539                         | 22.22789735                               | 0.008492449                     | 21.12847471                         | 23848.69463                                |
| 4.73104923                          | 12.46095485                               | 0.024678144                     | 16.94892705                         | 13213.36222                                |
| 4.784918066                         | 14.01056179                               | 0.012299723                     | 14.30321398                         | 8387.850436                                |
| 4.380962475                         | 11.96901537                               | 0.018121941                     | 7.641583466                         | 2066.630795                                |
| 5.046932934                         | 13.65153671                               | 0.009448127                     | 20.85473014                         | 11809.39779                                |
| 4.966719991                         | 19.11018201                               | 0.011446438                     | 17.97339111                         | 15897.77092                                |
| 4.904856023                         | 17.56406691                               | 0.010668676                     | 16.46023592                         | 11159.02841                                |
| 4.952284406                         | 12.84616312                               | 0.007373973                     | 17.93814642                         | 9088.406806                                |
| 4.670893134                         | 14.30000521                               | 0.009856297                     | 14.35017761                         | 4923.314482                                |
| 4.971952214                         | 10.60384145                               | 0.009581931                     | 20.53544949                         | 12773.37341                                |
| 5.131404088                         | 11.52876023                               | 0.011356681                     | 25.03289295                         | 22640.64197                                |
| 5.120510956                         | 13.02928293                               | 0.008396651                     | 23.28974448                         | 16008.38779                                |
| 4.747187202                         | 13.81661109                               | 0.011885682                     | 13.71429985                         | 5797.977241                                |
| 5.134873885                         | 17.98754069                               | 0.009068626                     | 21.89408907                         | 19972.16705                                |
| 5.366505443                         | 19.4912814                                | 0.005275021                     | 32.88939162                         | 46047.91276                                |
| 4.620266842                         | 12.80650779                               | 0.016948711                     | 13.62029072                         | 6604.074412                                |
| 5.061539501                         | 20.2140884                                | 0.009483335                     | 20.71749783                         | 25273.75508                                |
| 4.880166851                         | 18.375408                                 | 0.01017346                      | 15.78097567                         | 11457.419                                  |
| 5.267965821                         | 17.8837524                                | 0.007289795                     | 24.93817751                         | 26961.93885                                |
| 5.090231935                         | 18.06179884                               | 0.008161071                     | 20.91885741                         | 17658.35017                                |
| 4.70918913                          | 14.92484794                               | 0.015196631                     | 12.65497914                         | 7351.13857                                 |
| 4.876533524                         | 14.41126881                               | 0.011140279                     | 16.9813057                          | 11249.2352                                 |
| 4.877709411                         | 16.24619092                               | 0.011018571                     | 16.19793835                         | 11090.91524                                |
| 4.934515078                         | 18.25674705                               | 0.012260639                     | 17.94236893                         | 17978.80013                                |
| 4.976832072                         | 24.56632049                               | 0.012047682                     | 22.23004539                         | 30828.39802                                |
| 5.172513996                         | 19.33354066                               | 0.007507651                     | 22.89274824                         | 24084.92883                                |
| 5.015834893                         | 19.27051094                               | 0.009570656                     | 19.88919563                         | 18002.60536                                |
| 4.139415337                         | 9.148910626                               | 0.031201625                     | 8.208528214                         | 1455.32684                                 |
| 5.096953023                         | 18.73577133                               | 0.008484367                     | 20.61664223                         | 20918.44068                                |
| 5.008160606                         | 11.46674972                               | 0.010403986                     | 19.2688183                          | 12183.72205                                |
| 5.203329171                         | 17.24159425                               | 0.007553353                     | 24.49594149                         | 22315.61583                                |
| 4.745664941                         | 11.50940601                               | 0.01256291                      | 13.19637321                         | 5209.202668                                |
| 3.898772665                         | 8.898294705                               | 0.028346864                     | 6.100965311                         | 692.5848362                                |
| 4.792349121                         | 10.66329245                               | 0.012316213                     | 15.58517364                         | 7403.689772                                |
| 4.899348763                         | 16.83108532                               | 0.010184472                     | 17.6334724                          | 8719.554264                                |
| 4.932737785                         | 13.27495567                               | 0.009431268                     | 18.17378903                         | 10021.95355                                |
| 4.693327346                         | 13.33201587                               | 0.013061165                     | 12.17285862                         | 6365.136876                                |
| 4.902211882                         | 17.36358709                               | 0.013910219                     | 16.10680226                         | 12620.27627                                |
| 4.80713461                          | 13.43467496                               | 0.011452494                     | 13.52601697                         | 7362.172304                                |
| 5.545331094                         | 22.45178223                               | 0.004369963                     | 45.39071159                         | 79857.48903                                |
| 4.518911478                         | 12.64194187                               | 0.019477241                     | 11.23670331                         | 4312.137807                                |
| 4.730713395                         | 9.520563686                               | 0.012926459                     | 15.02512787                         | 5739.536666                                |
| 4.512362002                         | 9.340798975                               | 0.020757125                     | 10.96088005                         | 3527.210947                                |
| 5.407596022                         | 17.86917265                               | 0.005437603                     | 34.968257                           | 48395.7003                                 |

| log.sigma.5.0.mm.3D_glc_m_SumAverage | log.sigma.5.0.mm.3D_glc_m_lmc2 | log.sigma.5.0.mm.3D_glc_m_lmc1 | log.sigma.5.0.mm.3D_glc_m_DifferenceAverage | log.sigma.5.0.mm.3D_glc_m_Id |
|--------------------------------------|--------------------------------|--------------------------------|---------------------------------------------|------------------------------|
| 30.33203793                          | 0.935000454                    | -0.245161733                   | 2.489428451                                 | 0.42661616                   |
| 37.61434426                          | 0.904206744                    | -0.223168914                   | 2.014913493                                 | 0.464814179                  |
| 29.3639192                           | 0.900816291                    | -0.213681798                   | 2.252150378                                 | 0.4415556                    |
| 22.29246957                          | 0.911763749                    | -0.232028542                   | 1.835248781                                 | 0.482310857                  |
| 22.05169495                          | 0.938941698                    | -0.287045112                   | 1.848859209                                 | 0.502927285                  |
| 21.7402988                           | 0.920817248                    | -0.25872445                    | 1.650213653                                 | 0.512415323                  |
| 14.03049485                          | 0.939142332                    | -0.323582535                   | 1.352303755                                 | 0.5792656                    |
| 33.82399352                          | 0.939396561                    | -0.260796514                   | 2.084833035                                 | 0.463224872                  |
| 29.61957487                          | 0.90945059                     | -0.219642291                   | 2.15385706                                  | 0.461382268                  |
| 47.21050308                          | 0.909795158                    | -0.214737294                   | 2.282912554                                 | 0.434021516                  |
| 18.14285645                          | 0.888447786                    | -0.228980379                   | 1.534854075                                 | 0.533471272                  |
| 32.32490096                          | 0.871621411                    | -0.189525941                   | 2.168132736                                 | 0.445627239                  |
| 22.49107196                          | 0.897104281                    | -0.23201044                    | 1.549680548                                 | 0.533704391                  |
| 22.35907004                          | 0.871571373                    | -0.194512953                   | 1.977988003                                 | 0.459138083                  |
| 31.93954509                          | 0.907593434                    | -0.219318906                   | 2.62044989                                  | 0.436599223                  |
| 37.62598299                          | 0.922594285                    | -0.234955911                   | 2.167246818                                 | 0.468578816                  |
| 36.83052144                          | 0.904806359                    | -0.224332123                   | 2.127746669                                 | 0.455332221                  |
| 30.81712037                          | 0.928891381                    | -0.254317271                   | 1.901014738                                 | 0.495836989                  |
| 31.17270744                          | 0.852903929                    | -0.189193719                   | 2.099114831                                 | 0.457168956                  |
| 30.12363436                          | 0.918165255                    | -0.238104119                   | 1.877045551                                 | 0.489534155                  |
| 37.81944769                          | 0.870600756                    | -0.188622762                   | 2.060028191                                 | 0.463297207                  |
| 31.32182202                          | 0.920627746                    | -0.237334218                   | 2.041039393                                 | 0.461130255                  |
| 36.31402792                          | 0.903424892                    | -0.214180953                   | 2.08008104                                  | 0.453424482                  |
| 24.30588775                          | 0.929290009                    | -0.25767753                    | 2.143574051                                 | 0.454576658                  |
| 28.97869652                          | 0.896560803                    | -0.2054795                     | 2.286905684                                 | 0.43033339                   |
| 31.95748776                          | 0.911618558                    | -0.217610873                   | 2.461683811                                 | 0.4228861                    |
| 30.84046378                          | 0.930417387                    | -0.260564678                   | 1.891466948                                 | 0.481641343                  |
| 33.62397086                          | 0.863536166                    | -0.175753327                   | 2.335546556                                 | 0.423047752                  |
| 39.66251091                          | 0.861675665                    | -0.190428479                   | 2.082006156                                 | 0.460755952                  |
| 43.29668553                          | 0.881355287                    | -0.195282908                   | 2.174817881                                 | 0.457448072                  |
| 35.75855928                          | 0.919082101                    | -0.231922368                   | 1.990702396                                 | 0.468833963                  |
| 39.26308654                          | 0.884080152                    | -0.197448532                   | 2.143572782                                 | 0.457436739                  |
| 48.53335788                          | 0.941929261                    | -0.273894173                   | 1.90878571                                  | 0.488891484                  |
| 25.5509964                           | 0.928071338                    | -0.262932534                   | 2.319868343                                 | 0.453199073                  |
| 20.33187985                          | 0.90890305                     | -0.237718123                   | 1.940771782                                 | 0.484490978                  |
| 27.38746362                          | 0.874448168                    | -0.201517229                   | 1.782216419                                 | 0.492334084                  |
| 41.64141449                          | 0.92015167                     | -0.222229065                   | 2.408165067                                 | 0.424994267                  |
| 31.37857356                          | 0.887748039                    | -0.211046688                   | 1.779247959                                 | 0.489512869                  |
| 24.92491761                          | 0.908362335                    | -0.265776019                   | 1.39965753                                  | 0.553362188                  |
| 21.84559825                          | 0.921175456                    | -0.256857181                   | 1.772893495                                 | 0.510535186                  |
| 24.42962813                          | 0.867806765                    | -0.187279115                   | 1.944343793                                 | 0.472370362                  |
| 24.85352001                          | 0.861737558                    | -0.19563673                    | 1.814451759                                 | 0.492136616                  |
| 31.62015447                          | 0.905422675                    | -0.2315342                     | 1.692476973                                 | 0.50994957                   |
| 24.4023615                           | 0.911260175                    | -0.241041261                   | 1.94748817                                  | 0.498221292                  |
| 38.82969358                          | 0.889310995                    | -0.202115462                   | 2.563353217                                 | 0.450994016                  |
| 24.4378795                           | 0.919375673                    | -0.234009878                   | 1.884812552                                 | 0.471702157                  |
| 41.42223669                          | 0.899525389                    | -0.207384882                   | 2.191107448                                 | 0.44992041                   |
| 33.72567326                          | 0.898656295                    | -0.225165088                   | 1.869176764                                 | 0.501519454                  |
| 18.52487233                          | 0.940842213                    | -0.306838543                   | 1.884472998                                 | 0.489818812                  |
| 27.82851784                          | 0.934694903                    | -0.266343524                   | 1.944635512                                 | 0.486069012                  |
| 37.38042034                          | 0.915810828                    | -0.243371243                   | 1.701515741                                 | 0.514948471                  |
| 28.859002                            | 0.899990096                    | -0.244239834                   | 1.463415291                                 | 0.556378221                  |
| 28.09220506                          | 0.926250012                    | -0.25141994                    | 1.749989687                                 | 0.503677944                  |
| 40.06285174                          | 0.896181952                    | -0.222584735                   | 2.239682266                                 | 0.452488709                  |
| 33.11688681                          | 0.887852093                    | -0.196747788                   | 2.21433586                                  | 0.445671908                  |
| 33.20962428                          | 0.923802161                    | -0.229066624                   | 2.363084527                                 | 0.432321718                  |
| 44.36536452                          | 0.893900581                    | -0.202749711                   | 2.306530699                                 | 0.445636764                  |
| 24.89281982                          | 0.932171342                    | -0.277703462                   | 1.627204324                                 | 0.552093988                  |
| 28.02112358                          | 0.886924886                    | -0.208950427                   | 1.979083259                                 | 0.465749266                  |
| 23.93803075                          | 0.86315866                     | -0.20641946                    | 1.481286184                                 | 0.52532681                   |
| 27.30307341                          | 0.924871137                    | -0.240881829                   | 1.906141012                                 | 0.49338791                   |
| 38.12442199                          | 0.899163785                    | -0.217290735                   | 1.952876817                                 | 0.479374478                  |
| 35.029484                            | 0.89672073                     | -0.214578204                   | 2.005842611                                 | 0.469401679                  |
| 25.69232624                          | 0.864796271                    | -0.177614213                   | 2.39452499                                  | 0.41532731                   |
| 28.60001043                          | 0.861900574                    | -0.19006986                    | 2.54884053                                  | 0.415323228                  |
| 21.2076829                           | 0.902352384                    | -0.216297687                   | 2.242518934                                 | 0.444007688                  |
| 23.04865099                          | 0.957806024                    | -0.3050813                     | 1.923197886                                 | 0.490630696                  |
| 26.05856585                          | 0.911244787                    | -0.220856443                   | 2.118716116                                 | 0.462403412                  |
| 27.63322217                          | 0.893345478                    | -0.230426429                   | 1.863205853                                 | 0.479543933                  |
| 35.87237177                          | 0.921185852                    | -0.234487046                   | 2.093745515                                 | 0.459045776                  |
| 38.7810577                           | 0.894744718                    | -0.190434952                   | 2.779047202                                 | 0.399601397                  |
| 25.61301557                          | 0.887625589                    | -0.222529236                   | 1.822649443                                 | 0.500751869                  |
| 40.32479041                          | 0.902916303                    | -0.216311253                   | 2.078356669                                 | 0.463039961                  |
| 36.65144719                          | 0.86724213                     | -0.18591258                    | 1.997946687                                 | 0.462531676                  |
| 35.66141383                          | 0.920585837                    | -0.226895475                   | 2.212500065                                 | 0.447183624                  |
| 35.96393795                          | 0.898494937                    | -0.208695195                   | 2.305219352                                 | 0.441429507                  |
| 29.8482174                           | 0.895761903                    | -0.225353285                   | 1.693894799                                 | 0.514919621                  |
| 28.82253763                          | 0.894501841                    | -0.218041449                   | 2.134865565                                 | 0.460311775                  |
| 32.45148202                          | 0.865708018                    | -0.18686446                    | 2.113330218                                 | 0.458488605                  |
| 36.40192474                          | 0.892405702                    | -0.210346613                   | 1.948638598                                 | 0.478193603                  |
| 48.95600787                          | 0.913055371                    | -0.224865386                   | 2.489899557                                 | 0.451357601                  |
| 38.50081477                          | 0.891501612                    | -0.198194327                   | 2.447151395                                 | 0.419655362                  |
| 38.39154085                          | 0.900206233                    | -0.211428762                   | 2.185875958                                 | 0.442038258                  |
| 18.29782125                          | 0.908802911                    | -0.289578624                   | 1.534801813                                 | 0.553522875                  |
| 37.35602505                          | 0.905810488                    | -0.218458352                   | 2.088743445                                 | 0.452267465                  |
| 22.93349943                          | 0.924409663                    | -0.244300827                   | 1.798885152                                 | 0.503850583                  |
| 34.35230906                          | 0.919010735                    | -0.227517812                   | 2.396872157                                 | 0.428745358                  |
| 23.01881201                          | 0.886574945                    | -0.214224495                   | 1.763191104                                 | 0.49320155                   |
| 17.79658941                          | 0.860925115                    | -0.238417666                   | 1.867755948                                 | 0.478258791                  |
| 21.32658491                          | 0.925116368                    | -0.262161562                   | 1.967470928                                 | 0.463573705                  |
| 33.56283258                          | 0.89102307                     | -0.204722844                   | 2.023170877                                 | 0.46954079                   |
| 26.54991135                          | 0.905725199                    | -0.219422305                   | 2.181148359                                 | 0.446150798                  |
| 26.66403173                          | 0.870648536                    | -0.197174307                   | 1.864266416                                 | 0.475978546                  |
| 34.67034817                          | 0.917494688                    | -0.243680209                   | 1.703728005                                 | 0.503626152                  |
| 26.86934993                          | 0.876171869                    | -0.197147992                   | 1.823137938                                 | 0.487523376                  |
| 44.63186729                          | 0.943074432                    | -0.236899604                   | 3.92191942                                  | 0.328755681                  |
| 25.28388374                          | 0.901231799                    | -0.246167366                   | 1.5845655                                   | 0.523283524                  |
| 19.04112737                          | 0.935727058                    | -0.284622943                   | 1.994960152                                 | 0.46505285                   |
| 18.68159795                          | 0.912160598                    | -0.266521968                   | 1.526746923                                 | 0.539721929                  |
| 35.5761659                           | 0.928809878                    | -0.228128584                   | 3.120962078                                 | 0.362344147                  |

| log.sigma.5.0.mm.3D_glcm_ClusterTendency | log.sigma.5.0.mm.3D_firstorder_InterquartileRange | log.sigma.5.0.mm.3D_firstorder_Skewness | log.sigma.5.0.mm.3D_firstorder_Uniformity |
|------------------------------------------|---------------------------------------------------|-----------------------------------------|-------------------------------------------|
| 98.45140966                              | 203.0938549                                       | 0.030913366                             | 0.054324565                               |
| 62.64630722                              | 137.9914188                                       | 0.075222382                             | 0.0731035                                 |
| 65.27846112                              | 148.1486702                                       | -0.212733134                            | 0.070738701                               |
| 61.34840678                              | 134.9378052                                       | 0.475806556                             | 0.072723916                               |
| 63.63818418                              | 155.8632765                                       | 0.424725319                             | 0.082223982                               |
| 56.1014979                               | 105.3696136                                       | 0.751395728                             | 0.091193436                               |
| 48.9799852                               | 161.170969                                        | 0.536282337                             | 0.106591279                               |
| 83.92357094                              | 166.9980927                                       | 0.13552899                              | 0.06183777                                |
| 74.00848954                              | 174.284565                                        | 0.33255214                              | 0.065223333                               |
| 83.88017318                              | 160.3629074                                       | -0.323039554                            | 0.060297899                               |
| 37.91468333                              | 113.5700779                                       | 0.477547026                             | 0.093884724                               |
| 53.74586202                              | 127.2066765                                       | -0.1509038                              | 0.074569997                               |
| 41.33395774                              | 105.2757225                                       | 0.486578096                             | 0.089546023                               |
| 47.79442618                              | 128.1571822                                       | -0.017884391                            | 0.075542182                               |
| 88.38763138                              | 159.0594158                                       | 0.612181417                             | 0.061376186                               |
| 86.51425216                              | 161.1335559                                       | -0.032255424                            | 0.062122743                               |
| 62.86874592                              | 121.8075371                                       | -0.23238664                             | 0.07189643                                |
| 69.95512989                              | 160.3854065                                       | 0.407727112                             | 0.06856351                                |
| 41.92938659                              | 130.2984428                                       | -0.329519249                            | 0.079959953                               |
| 66.49003186                              | 131.4989738                                       | -0.135741443                            | 0.074110949                               |
| 60.77509465                              | 127.7437485                                       | -0.340775127                            | 0.070866932                               |
| 70.75653541                              | 144.0057697                                       | 0.180409889                             | 0.067282764                               |
| 72.59472574                              | 142.9197559                                       | 0.372713887                             | 0.066357936                               |
| 76.13954609                              | 176.0086515                                       | 0.009477203                             | 0.065640494                               |
| 81.3983014                               | 160.2694826                                       | -0.446265552                            | 0.061436854                               |
| 81.99161686                              | 142.2129831                                       | 0.256433601                             | 0.064582166                               |
| 71.72514097                              | 170.2461529                                       | 0.25873306                              | 0.062250525                               |
| 66.29019977                              | 150.2112974                                       | -0.411483244                            | 0.06700918                                |
| 54.87851088                              | 117.4461002                                       | -0.645754551                            | 0.077485279                               |
| 61.56941361                              | 132.0889921                                       | -0.241775625                            | 0.068952162                               |
| 77.84825252                              | 140.480031                                        | -0.233820853                            | 0.065275548                               |
| 68.80286179                              | 146.5702381                                       | -0.143649778                            | 0.06689576                                |
| 87.33448692                              | 140.341383                                        | -0.561730963                            | 0.071755198                               |
| 60.84834808                              | 173.9573059                                       | 0.058214874                             | 0.067414128                               |
| 51.09637231                              | 118.6033539                                       | 0.158994369                             | 0.077517551                               |
| 44.12102493                              | 113.7327194                                       | 0.264224982                             | 0.083271387                               |
| 100.0901791                              | 153.1815834                                       | -0.050613519                            | 0.057755912                               |
| 46.83477659                              | 111.0782242                                       | -0.147165569                            | 0.081999196                               |
| 36.27438958                              | 94.09337521                                       | 0.502426593                             | 0.099345399                               |
| 58.6732046                               | 151.1575527                                       | 0.52823321                              | 0.080982748                               |
| 40.81061953                              | 128.1933022                                       | 0.139519028                             | 0.081238856                               |
| 41.39489391                              | 128.770195                                        | 0.348418536                             | 0.082631414                               |
| 49.87501753                              | 135.4437504                                       | 0.300184079                             | 0.08048923                                |
| 59.21773832                              | 142.9286661                                       | 0.517800037                             | 0.079411042                               |
| 87.05946898                              | 140.2349603                                       | -0.469898488                            | 0.06237498                                |
| 68.6547897                               | 149.6800537                                       | -0.028103508                            | 0.064649812                               |
| 75.30316802                              | 141.43402                                         | -0.241195081                            | 0.064917659                               |
| 53.71814743                              | 101.4213839                                       | -0.951645188                            | 0.089962128                               |
| 50.41453225                              | 152.4350133                                       | 0.329202659                             | 0.08392435                                |
| 66.30706147                              | 160.744132                                        | 0.448026838                             | 0.068529585                               |
| 58.72393743                              | 130.2365236                                       | 0.247414222                             | 0.078781491                               |
| 35.24448457                              | 84.08697796                                       | 0.126958842                             | 0.11123448                                |
| 67.60355813                              | 161.2881699                                       | 0.430695899                             | 0.070368752                               |
| 57.03517513                              | 141.1248178                                       | 0.013599264                             | 0.070843127                               |
| 69.68709795                              | 156.433815                                        | -0.06703321                             | 0.062556835                               |
| 93.62027164                              | 162.0892941                                       | -0.004968649                            | 0.056390944                               |
| 75.55704194                              | 143.3188362                                       | -0.431080746                            | 0.066427973                               |
| 60.40357957                              | 120.0975575                                       | 0.879371313                             | 0.096636405                               |
| 50.32490829                              | 111.5105147                                       | 0.177486659                             | 0.081690027                               |
| 26.64523096                              | 94.51195526                                       | -0.240856703                            | 0.103713479                               |
| 76.02839427                              | 179.4976196                                       | 0.238606735                             | 0.062191362                               |
| 64.45212146                              | 126.1007423                                       | -0.109022899                            | 0.073149787                               |
| 57.06519366                              | 128.0786724                                       | -0.168491908                            | 0.073930269                               |
| 62.31061817                              | 165.6830873                                       | -0.193973797                            | 0.064081636                               |
| 45.85828996                              | 151.4445343                                       | -0.246763367                            | 0.072536627                               |
| 72.81648052                              | 174.7812233                                       | 0.482678744                             | 0.066472506                               |
| 92.29714461                              | 172.9010868                                       | 0.605742579                             | 0.063323459                               |
| 84.32125683                              | 182.8606739                                       | 0.36547285                              | 0.060664392                               |
| 48.48345459                              | 133.8834152                                       | 0.006356558                             | 0.077135555                               |
| 78.56372287                              | 147.8976822                                       | 0.025947371                             | 0.064398066                               |
| 117.685192                               | 187.809691                                        | -0.582316801                            | 0.051009236                               |
| 47.37563634                              | 116.8276062                                       | 0.586229411                             | 0.090451091                               |
| 75.37604512                              | 142.8272552                                       | -0.241403895                            | 0.068487562                               |
| 54.9611417                               | 122.8555031                                       | -0.463810201                            | 0.074458566                               |
| 90.65963422                              | 166.6827726                                       | 0.1412019                               | 0.057529011                               |
| 73.31123049                              | 159.4117971                                       | -0.12363842                             | 0.062489958                               |
| 44.79916087                              | 108.8950644                                       | -0.232845382                            | 0.085297668                               |
| 59.31196187                              | 138.2765045                                       | -0.018172324                            | 0.075184595                               |
| 55.70238096                              | 111.150383                                        | -0.271501926                            | 0.078033569                               |
| 63.73770218                              | 108.5296192                                       | -0.465713048                            | 0.078592797                               |
| 75.9948172                               | 106.2476192                                       | -0.702472828                            | 0.080076807                               |
| 81.60663032                              | 146.7447218                                       | -0.224750233                            | 0.062198135                               |
| 71.17116353                              | 146.6790504                                       | 0.230790936                             | 0.067163496                               |
| 27.67395369                              | 120.9501638                                       | 0.278217114                             | 0.111224038                               |
| 74.08675654                              | 142.2892094                                       | -0.462337088                            | 0.065258943                               |
| 70.5600483                               | 170.0450449                                       | 0.421476643                             | 0.066083968                               |
| 85.74012939                              | 153.4243975                                       | -0.086733699                            | 0.059529694                               |
| 47.08249495                              | 135.8015804                                       | 0.255712392                             | 0.079275267                               |
| 18.13210792                              | 112.8551407                                       | -0.346798886                            | 0.115799693                               |
| 55.59648688                              | 145.4667072                                       | -0.013020228                            | 0.073957448                               |
| 60.97833455                              | 153.023304                                        | 0.37679419                              | 0.069972313                               |
| 64.19194119                              | 151.367939                                        | 0.151827489                             | 0.067670195                               |
| 42.64559731                              | 101.3542316                                       | -0.304804117                            | 0.08796464                                |
| 58.10406097                              | 109.2582054                                       | 0.015222176                             | 0.080429281                               |
| 47.92146647                              | 119.5623569                                       | -0.016602455                            | 0.078581493                               |
| 158.2597922                              | 209.0638275                                       | -0.615902481                            | 0.046789583                               |
| 40.04410914                              | 115.5754929                                       | 0.425205814                             | 0.096404346                               |
| 53.04712688                              | 161.9957151                                       | 0.161071257                             | 0.073543541                               |
| 39.17381888                              | 123.3518176                                       | 0.464285429                             | 0.093471005                               |
| 123.2369244                              | 179.4090738                                       | -0.165777263                            | 0.052418083                               |

| log.sigma.5.0.mm.3D_firstorder_MeanAbsoluteDeviation | log.sigma.5.0.mm.3D_firstorder_Energy | log.sigma.5.0.mm.3D_firstorder_RobustMeanAbsoluteDeviation | log.sigma.5.0.mm.3D_firstorder_Median |
|------------------------------------------------------|---------------------------------------|------------------------------------------------------------|---------------------------------------|
| 109.3993244                                          | 50671261.98                           | 82.93410344                                                | 156.6721649                           |
| 83.5151758                                           | 54568153.51                           | 58.16786436                                                | 110.6672516                           |
| 86.04895338                                          | 13760773.62                           | 60.76593003                                                | 44.67402267                           |
| 81.84159911                                          | 73689324.53                           | 57.39658456                                                | 125.312355                            |
| 87.77467918                                          | 17651495.34                           | 65.68703292                                                | 55.38141632                           |
| 75.02373208                                          | 26248238.74                           | 48.74758518                                                | 60.67072105                           |
| 81.2709831                                           | 17481082.06                           | 66.36187038                                                | 50.94300079                           |
| 97.15488413                                          | 69115462.41                           | 68.39385597                                                | 138.1669769                           |
| 94.88632802                                          | 71464852.96                           | 71.0084105                                                 | 129.5261536                           |
| 95.12468074                                          | 91626921.87                           | 66.54503086                                                | 124.2381973                           |
| 66.06665746                                          | 34721194.02                           | 47.07876303                                                | 96.32828522                           |
| 77.33692775                                          | 37084127.83                           | 52.68774081                                                | 110.8255539                           |
| 68.34872791                                          | 48865087.62                           | 46.42464492                                                | 81.17990875                           |
| 74.64355999                                          | 30794024.01                           | 53.19006062                                                | 86.44659424                           |
| 100.2536211                                          | 49499527.76                           | 67.99899183                                                | 106.89505                             |
| 96.98687639                                          | 85444615.21                           | 66.52528641                                                | 72.97403717                           |
| 81.30053289                                          | 26674753.97                           | 52.15795742                                                | 70.35092926                           |
| 88.90713082                                          | 101011313.1                           | 65.58620779                                                | 154.7067184                           |
| 73.3776852                                           | 26237018.06                           | 53.67467604                                                | 131.368454                            |
| 82.05831014                                          | 67912873.06                           | 55.25725784                                                | 101.4562149                           |
| 81.7187935                                           | 101593699.6                           | 55.02122646                                                | 65.84662247                           |
| 86.3551773                                           | 46971935.65                           | 59.75538517                                                | 93.29627228                           |
| 88.42182174                                          | 85620565.52                           | 59.86767136                                                | 76.5307312                            |
| 95.42057716                                          | 22519398.49                           | 71.43340072                                                | 74.45458603                           |
| 95.8214995                                           | 37914697.37                           | 67.6525702                                                 | 40.18155861                           |
| 92.84745945                                          | 42431094.26                           | 61.5033012                                                 | 119.207325                            |
| 94.52463964                                          | 50819613.4                            | 70.5877432                                                 | 88.05103302                           |
| 86.03776999                                          | 57824772.84                           | 60.91944652                                                | 86.39180756                           |
| 77.37568284                                          | 74040104.62                           | 49.15912673                                                | 107.8182755                           |
| 84.2571768                                           | 66978054.33                           | 55.28273295                                                | 96.88465881                           |
| 88.67557723                                          | 101867095.5                           | 59.00137909                                                | 103.5304794                           |
| 87.16371027                                          | 172743986.3                           | 59.95765474                                                | 142.5322647                           |
| 90.10232108                                          | 73569731.59                           | 59.41982679                                                | 105.0075455                           |
| 91.54088256                                          | 13417130.93                           | 70.42652379                                                | 122.936348                            |
| 74.97046661                                          | 11985660.65                           | 50.74072021                                                | 59.9706459                            |
| 70.39416944                                          | 59864219.68                           | 48.3385639                                                 | 92.79167175                           |
| 101.4796718                                          | 123709240.5                           | 67.74843454                                                | 127.2690964                           |
| 70.32619982                                          | 64941525.35                           | 47.41143217                                                | 100.3943863                           |
| 62.28305375                                          | 17584543.64                           | 40.71491372                                                | 60.0169754                            |
| 82.9704338                                           | 45424316.88                           | 60.79399054                                                | 108.9875412                           |
| 73.01264462                                          | 26676787.09                           | 53.95312084                                                | 98.92610168                           |
| 71.99069102                                          | 42859522.11                           | 53.1446246                                                 | 109.0534744                           |
| 75.42001132                                          | 75596447.19                           | 54.93933506                                                | 113.7783737                           |
| 84.18748863                                          | 44086024.91                           | 60.25623067                                                | 87.5332756                            |
| 96.63575425                                          | 74257832.2                            | 61.76108645                                                | 73.88216782                           |
| 86.3887251                                           | 70087742.73                           | 61.99529797                                                | 94.18724823                           |
| 88.3845304                                           | 91374216.45                           | 59.40505334                                                | 106.4651985                           |
| 72.55924509                                          | 15702018.18                           | 45.26337496                                                | 47.97138786                           |
| 80.33573109                                          | 9745252.032                           | 63.06423867                                                | 71.26777267                           |
| 89.11868706                                          | 31820546.68                           | 65.61476358                                                | 118.6166153                           |
| 81.24888752                                          | 104043084.1                           | 55.90455168                                                | 104.7933159                           |
| 58.28812909                                          | 31065986                              | 35.88272119                                                | 87.7308197                            |
| 89.09658342                                          | 142755417.9                           | 66.22683804                                                | 141.0965576                           |
| 83.79730323                                          | 25465224.87                           | 59.49344958                                                | 94.05534363                           |
| 90.32231973                                          | 130386660.1                           | 64.7264522                                                 | 142.4955597                           |
| 100.2852151                                          | 41058242.74                           | 68.28461272                                                | 72.45593262                           |
| 88.54947742                                          | 87675735.36                           | 59.67049134                                                | 109.9283066                           |
| 78.7883866                                           | 47314415.01                           | 52.21180871                                                | 66.24386978                           |
| 73.50438159                                          | 22996708.23                           | 48.33987671                                                | 79.18572998                           |
| 55.07611095                                          | 23750673.88                           | 38.24515386                                                | 110.3157043                           |
| 95.68426846                                          | 126670728.3                           | 73.5556931                                                 | 162.9573364                           |
| 82.53731605                                          | 134884307.9                           | 54.45291074                                                | 105.3055191                           |
| 78.69773394                                          | 56991343.07                           | 53.58361523                                                | 122.317749                            |
| 89.71226199                                          | 51618461.96                           | 67.47936044                                                | 130.719223                            |
| 82.07103767                                          | 16333204.13                           | 61.75040245                                                | 140.9452667                           |
| 94.43250037                                          | 55743771.37                           | 70.98811145                                                | 131.8939972                           |
| 101.289486                                           | 32736474.17                           | 72.99416031                                                | 96.11288452                           |
| 99.94952991                                          | 145232635.1                           | 73.89718917                                                | 139.327652                            |
| 75.27611615                                          | 25396230.03                           | 55.19904243                                                | 97.55041504                           |
| 92.2122813                                           | 63274968.74                           | 62.554715                                                  | 95.48274994                           |
| 115.901026                                           | 132081095.2                           | 80.09858513                                                | 135.9212723                           |
| 72.91856396                                          | 52018528.85                           | 49.80712698                                                | 107.6170883                           |
| 87.24226156                                          | 152359395.7                           | 59.02470286                                                | 132.0315399                           |
| 77.76965869                                          | 150400904.1                           | 51.62142259                                                | 120.5127869                           |
| 99.31120058                                          | 143526904.7                           | 68.9307769                                                 | 126.4821968                           |
| 93.38460558                                          | 59960252.54                           | 65.67134212                                                | 104.0917435                           |
| 68.76276767                                          | 34646736.82                           | 45.29698407                                                | 78.80161285                           |
| 81.41154204                                          | 33462937.84                           | 57.28216145                                                | 106.8556519                           |
| 75.75418632                                          | 59337427.84                           | 48.73619159                                                | 94.24589539                           |
| 77.90574978                                          | 68778801.66                           | 47.9411928                                                 | 66.70449066                           |
| 80.52603402                                          | 25215343.28                           | 46.72448671                                                | 70.79949951                           |
| 93.33318294                                          | 52525439.68                           | 61.75369624                                                | 73.97309113                           |
| 89.5464894                                           | 83427632.1                            | 60.22723115                                                | 128.4991302                           |
| 61.88697881                                          | 6779850.896                           | 48.87323945                                                | 73.09944153                           |
| 88.42508253                                          | 114272449.2                           | 59.14384774                                                | 134.1064987                           |
| 90.68656005                                          | 91985608.3                            | 67.72599787                                                | 103.162117                            |
| 96.38371033                                          | 39895521.55                           | 64.61853068                                                | 107.4864349                           |
| 75.0663722                                           | 71290625.35                           | 55.34854977                                                | 111.3437424                           |
| 55.52445921                                          | 8500171.419                           | 43.85555762                                                | 133.9368591                           |
| 81.39912926                                          | 11954928.42                           | 59.42335034                                                | 93.94072342                           |
| 85.06636674                                          | 108198046.9                           | 62.15176321                                                | 136.7431793                           |
| 85.84983504                                          | 27183454.72                           | 60.56241321                                                | 107.1634827                           |
| 65.62715522                                          | 14729089.62                           | 42.71587847                                                | 47.71681213                           |
| 75.04731666                                          | 82297842.79                           | 47.62449007                                                | 88.55639648                           |
| 72.71192276                                          | 140599453.5                           | 49.92851256                                                | 140.8203964                           |
| 133.2175301                                          | 25648928.21                           | 89.72857582                                                | 52.80794907                           |
| 68.00241239                                          | 31359965.96                           | 48.44843777                                                | 84.49852753                           |
| 82.58444426                                          | 13277656.88                           | 63.75991063                                                | 145.5060272                           |
| 69.57317758                                          | 13901295.19                           | 51.1909658                                                 | 72.13737869                           |
| 114.6813326                                          | 28629284.74                           | 76.35026027                                                | 71.5796051                            |

| log.sigma.5.0.mm.3D_firstorder_TotalEnergy | log.sigma.5.0.mm.3D_firstorder_Maximum | log.sigma.5.0.mm.3D_firstorder_RootMeanSquared | log.sigma.5.0.mm.3D_firstorder_90Percentile | log.sigma.5.0.mm.3D_firstorder_Minimum |
|--------------------------------------------|----------------------------------------|------------------------------------------------|---------------------------------------------|----------------------------------------|
| 1368124073                                 | 467.6130371                            | 205.2334032                                    | 330.1539429                                 | -177.8731842                           |
| 1473340145                                 | 414.8034363                            | 165.1789235                                    | 279.1588165                                 | -307.8885803                           |
| 371540887.7                                | 386.7808838                            | 110.9431579                                    | 150.0309021                                 | -303.506073                            |
| 1989611762                                 | 473.5629883                            | 173.3219289                                    | 295.7374451                                 | -118.7165833                           |
| 476590374.2                                | 327.7531128                            | 136.3821853                                    | 248.0746246                                 | -173.0295563                           |
| 708702445.9                                | 388.3225098                            | 126.5881739                                    | 234.714975                                  | -155.7884369                           |
| 471989215.5                                | 306.066803                             | 128.6016859                                    | 229.2711121                                 | -57.93478394                           |
| 1866117485                                 | 515.6990356                            | 195.6811562                                    | 317.8147034                                 | -231.8709259                           |
| 1929551030                                 | 479.2218018                            | 187.7670477                                    | 311.4239319                                 | -181.7367249                           |
| 2473926890                                 | 472.9743958                            | 174.6762591                                    | 280.6538574                                 | -444.5741272                           |
| 937472238.5                                | 335.0647583                            | 138.6175599                                    | 237.3002197                                 | -97.58974457                           |
| 1001271451                                 | 413.8696289                            | 148.3522311                                    | 237.4495483                                 | -263.5618591                           |
| 1319357366                                 | 361.928833                             | 129.1634555                                    | 221.6285645                                 | -163.5466766                           |
| 831438648.1                                | 332.035675                             | 128.7390699                                    | 215.6127533                                 | -164.3271637                           |
| 1336487250                                 | 488.9830017                            | 178.8195714                                    | 308.9738434                                 | -236.8022766                           |
| 2307004611                                 | 424.9164429                            | 144.2029943                                    | 239.124762                                  | -372.5736389                           |
| 720218357.1                                | 393.5294189                            | 128.9177428                                    | 203.1484619                                 | -357.8866882                           |
| 2727305454                                 | 564.3227539                            | 198.7168702                                    | 308.5832916                                 | -177.3131409                           |
| 708399487.7                                | 339.0438538                            | 151.9735721                                    | 231.0418854                                 | -245.7256927                           |
| 1833647573                                 | 445.9039001                            | 153.0037896                                    | 255.5253296                                 | -230.3931885                           |
| 2743029890                                 | 450.2581787                            | 120.9040881                                    | 185.3329193                                 | -376.0184631                           |
| 1268242263                                 | 545.4836426                            | 148.8157489                                    | 246.3537292                                 | -272.8634949                           |
| 2311755269                                 | 512.6994629                            | 144.141069                                     | 246.8258667                                 | -326.7945251                           |
| 608023759.3                                | 330.4571838                            | 147.863091                                     | 251.84021                                   | -186.6587067                           |
| 1023696829                                 | 290.5362244                            | 120.6655528                                    | 165.7128754                                 | -301.9927979                           |
| 1145639545                                 | 491.3103027                            | 177.1551452                                    | 287.0331604                                 | -242.34729                             |
| 1372129562                                 | 402.5353394                            | 151.6077167                                    | 266.3613892                                 | -244.4653625                           |
| 1561268867                                 | 367.9674377                            | 131.283669                                     | 205.4104401                                 | -315.0016785                           |
| 1999082825                                 | 390.2709961                            | 147.5903388                                    | 226.2349426                                 | -364.7140808                           |
| 1808407467                                 | 530.5113525                            | 145.6100834                                    | 230.3931671                                 | -414.1296692                           |
| 2750411578                                 | 408.7776794                            | 156.8237788                                    | 254.6116592                                 | -310.5089417                           |
| 4664087631                                 | 520.942627                             | 185.8730676                                    | 295.4500183                                 | -319.8171997                           |
| 1986382753                                 | 437.1296692                            | 170.4918068                                    | 281.0908203                                 | -458.9022827                           |
| 362262535.1                                | 377.9332272                            | 167.0156972                                    | 268.0210571                                 | -160.5352631                           |
| 323612837.4                                | 308.6714172                            | 116.1781631                                    | 198.7426208                                 | -165.9504547                           |
| 1616333931                                 | 355.7694702                            | 136.4137452                                    | 233.6903534                                 | -202.1735535                           |
| 3340149494                                 | 577.3346558                            | 186.1777581                                    | 314.3272034                                 | -359.144104                            |
| 1753421185                                 | 354.395813                             | 138.3876542                                    | 228.7753906                                 | -265.312561                            |
| 474782678.3                                | 345.4055481                            | 108.8550547                                    | 195.0489471                                 | -209.1839905                           |
| 1226456556                                 | 415.9264221                            | 166.6297538                                    | 282.6904755                                 | -105.0551376                           |
| 720273251.5                                | 329.2774353                            | 142.3766653                                    | 236.82444                                   | -154.842453                            |
| 1157207097                                 | 392.0244141                            | 148.9430014                                    | 244.9787796                                 | -152.6175079                           |
| 2041104074                                 | 396.7602844                            | 158.0317983                                    | 262.1313049                                 | -246.6510925                           |
| 1190322673                                 | 403.1963501                            | 152.9713226                                    | 269.369693                                  | -158.5724335                           |
| 2004961469                                 | 400.9769897                            | 145.7839399                                    | 232.2408432                                 | -382.27948                             |
| 1892369054                                 | 395.9755859                            | 140.0177239                                    | 228.3772186                                 | -189.3388977                           |
| 2467103844                                 | 479.8208923                            | 157.4469193                                    | 254.6964111                                 | -390.0973206                           |
| 423954490.9                                | 296.8334335                            | 101.7719597                                    | 128.1198349                                 | -353.7850952                           |
| 263121804.9                                | 288.1822815                            | 131.4489089                                    | 234.3249237                                 | -102.1182251                           |
| 859154760.5                                | 468.1905212                            | 170.8600658                                    | 280.6797028                                 | -193.4210968                           |
| 2809163270                                 | 429.7339172                            | 161.602079                                     | 278.1003784                                 | -304.1123962                           |
| 838781621.9                                | 345.0541382                            | 126.0254178                                    | 206.5127335                                 | -249.7216949                           |
| 3854396284                                 | 512.444519                             | 193.8991929                                    | 319.3966248                                 | -156.4782562                           |
| 687561071.5                                | 370.7293701                            | 147.4671579                                    | 253.9862823                                 | -362.6174316                           |
| 3520439822                                 | 421.9385986                            | 181.9842793                                    | 292.9811829                                 | -235.0833588                           |
| 1108572554                                 | 442.015625                             | 147.4684733                                    | 232.9985199                                 | -319.0941162                           |
| 2367244855                                 | 456.8626709                            | 163.5192928                                    | 261.5060669                                 | -410.7597656                           |
| 1277489205                                 | 477.740387                             | 139.4809678                                    | 248.8893555                                 | -195.5917816                           |
| 620911122.1                                | 363.7752075                            | 129.4660154                                    | 219.7626846                                 | -248.1342316                           |
| 641268194.8                                | 291.7472229                            | 130.0168998                                    | 196.5618134                                 | -152.0744781                           |
| 3420109665                                 | 465.7007141                            | 207.5346522                                    | 334.9185181                                 | -135.077179                            |
| 3641876314                                 | 487.4434509                            | 156.7881493                                    | 263.1807434                                 | -347.0692749                           |
| 1538766263                                 | 433.0770264                            | 158.4148457                                    | 242.9178619                                 | -278.0527649                           |
| 1393698473                                 | 364.7963257                            | 166.2317948                                    | 263.0240234                                 | -161.0091858                           |
| 440996511.6                                | 360.3218689                            | 166.3832829                                    | 252.2648987                                 | -191.7619934                           |
| 1505081827                                 | 513.4564819                            | 190.0707161                                    | 310.3728821                                 | -92.87191772                           |
| 883884802.7                                | 493.0117188                            | 175.9029478                                    | 300.9907349                                 | -147.5634918                           |
| 3921281148                                 | 463.965271                             | 201.8094223                                    | 343.846756                                  | -139.7599487                           |
| 685698210.8                                | 314.2058716                            | 140.1475028                                    | 235.7676758                                 | -200.9791718                           |
| 1708424156                                 | 458.3327026                            | 158.8688686                                    | 269.3768127                                 | -317.7370605                           |
| 3566189571                                 | 474.3698425                            | 186.2395274                                    | 287.3528625                                 | -349.1570435                           |
| 1404500279                                 | 393.6040649                            | 158.8693201                                    | 275.5969849                                 | -171.222641                            |
| 4113703685                                 | 541.8868408                            | 180.4505035                                    | 287.9021057                                 | -333.2347717                           |
| 4060824411                                 | 422.1365051                            | 151.9852268                                    | 237.7764587                                 | -305.7270203                           |
| 3875226428                                 | 657.3631592                            | 183.5100852                                    | 296.3969025                                 | -280.2168274                           |
| 1618926819                                 | 537.3075562                            | 160.3838335                                    | 259.6723938                                 | -313.9035645                           |
| 935461894.2                                | 359.9733582                            | 121.292993                                     | 198.8793823                                 | -258.6355591                           |
| 903499321.7                                | 378.1682129                            | 156.9178341                                    | 261.0553284                                 | -211.6801147                           |
| 1602110552                                 | 402.5404663                            | 134.5836839                                    | 210.3207932                                 | -299.8149109                           |
| 1857027645                                 | 388.5843506                            | 124.2799171                                    | 191.6312042                                 | -353.3007507                           |
| 680814268.5                                | 450.3031921                            | 136.0642051                                    | 202.7618881                                 | -523.1647949                           |
| 1418186871                                 | 454.6391907                            | 140.6012142                                    | 216.4087189                                 | -379.4892273                           |
| 2252546067                                 | 543.439209                             | 183.6348527                                    | 306.0807068                                 | -324.2994385                           |
| 183055974.2                                | 248.1055603                            | 113.8568664                                    | 188.3587921                                 | -109.759491                            |
| 3085356129                                 | 454.1156616                            | 172.014332                                     | 266.5792511                                 | -308.5063171                           |
| 2483611424                                 | 474.2394104                            | 162.7215361                                    | 275.8534454                                 | -146.1125183                           |
| 1077179082                                 | 472.5598755                            | 167.1467628                                    | 270.9423309                                 | -289.4262695                           |
| 1924846884                                 | 370.6831055                            | 153.061243                                     | 254.4854889                                 | -126.5528412                           |
| 229504628.3                                | 227.6400909                            | 143.8112732                                    | 209.4817657                                 | -53.23660278                           |
| 322783067.4                                | 301.2162476                            | 143.8167833                                    | 238.9856354                                 | -139.1432495                           |
| 2921347267                                 | 457.497467                             | 183.5648644                                    | 302.3753662                                 | -225.9435577                           |
| 733953277.4                                | 378.303894                             | 156.8451833                                    | 274.3626343                                 | -181.2636566                           |
| 397685419.8                                | 272.593689                             | 97.10630691                                    | 152.4136642                                 | -272.1708679                           |
| 2222041755                                 | 407.3033447                            | 137.4991116                                    | 229.792099                                  | -321.677063                            |
| 3796185245                                 | 420.0178528                            | 172.8485955                                    | 268.4817352                                 | -157.9635773                           |
| 692521061.8                                | 402.4629822                            | 170.3367978                                    | 210.7663559                                 | -502.5805969                           |
| 846719080.8                                | 340.2141113                            | 133.3710699                                    | 235.1139038                                 | -185.2118225                           |
| 358496735.7                                | 373.3604431                            | 176.132231                                     | 280.6879333                                 | -67.38301086                           |
| 375334970.1                                | 305.0176697                            | 125.1183907                                    | 220.7835678                                 | -104.140419                            |
| 772990688.1                                | 468.6372986                            | 157.5079012                                    | 221.6099915                                 | -374.6587219                           |

| log.sigma.5.0.mm.3D_firstorder_Entropy | log.sigma.5.0.mm.3D_firstorder_StandardDeviation | log.sigma.5.0.mm.3D_firstorder_Range | log.sigma.5.0.mm.3D_firstorder_Variance | log.sigma.5.0.mm.3D_firstorder_10Percentile |
|----------------------------------------|--------------------------------------------------|--------------------------------------|-----------------------------------------|---------------------------------------------|
| 4.35447602                             | 129.2343579                                      | 645.4862213                          | 16701.51926                             | -0.03651547                                 |
| 4.039184754                            | 105.5489941                                      | 722.6920166                          | 11140.59015                             | 13.90281763                                 |
| 4.075024686                            | 107.3890557                                      | 690.2869568                          | 11532.40929                             | -121.5624954                                |
| 4.007191628                            | 102.0224235                                      | 592.2795715                          | 10408.57489                             | 22.92245483                                 |
| 3.898056964                            | 104.1962948                                      | 500.7826691                          | 10856.86786                             | -23.73282051                                |
| 3.824427145                            | 96.69726499                                      | 544.1109467                          | 9350.361056                             | -23.42842884                                |
| 3.50024526                             | 91.20721343                                      | 364.0015869                          | 8318.755782                             | -5.943104935                                |
| 4.273548961                            | 120.9389354                                      | 747.5699615                          | 14626.2261                              | 15.80474415                                 |
| 4.136185229                            | 113.4040356                                      | 660.9585266                          | 12860.47529                             | 20.19939613                                 |
| 4.280251777                            | 120.1768363                                      | 917.5485229                          | 14442.47199                             | -24.38287048                                |
| 3.647367479                            | 81.39093079                                      | 432.6545029                          | 6624.483616                             | 19.06330872                                 |
| 4.000579717                            | 98.72372258                                      | 677.431488                           | 9746.373401                             | -10.67129803                                |
| 3.773574836                            | 86.62247558                                      | 525.4755096                          | 7503.453275                             | -2.853321075                                |
| 3.907434375                            | 92.52143578                                      | 496.3628387                          | 8560.216079                             | -30.47539215                                |
| 4.287347604                            | 126.6432452                                      | 725.7852783                          | 16038.51156                             | -14.40722656                                |
| 4.287690382                            | 122.240357                                       | 797.4900818                          | 14942.70489                             | -63.54470901                                |
| 4.121246875                            | 108.232302                                       | 751.4161072                          | 11714.23119                             | -60.99386292                                |
| 4.087689961                            | 107.9098431                                      | 741.6358948                          | 11644.53425                             | -43.34753456                                |
| 3.84190183                             | 89.45009803                                      | 584.7695465                          | 8001.320038                             | 12.02904558                                 |
| 4.054637023                            | 105.8501921                                      | 676.2970886                          | 11204.26316                             | -4.409684658                                |
| 4.097896487                            | 105.3778145                                      | 826.2766418                          | 11104.48378                             | -80.06858902                                |
| 4.149002284                            | 109.633076                                       | 818.3471375                          | 12019.41136                             | -27.36564636                                |
| 4.192285669                            | 113.7240172                                      | 839.493988                           | 12933.15209                             | -44.47069931                                |
| 4.119855187                            | 114.1658357                                      | 517.1158905                          | 13033.83805                             | -53.60966835                                |
| 4.226093037                            | 118.2593448                                      | 592.5290222                          | 13985.27264                             | -148.7334518                                |
| 4.253375404                            | 119.9577562                                      | 733.6575928                          | 14389.86328                             | -3.246427035                                |
| 4.171598288                            | 113.7463682                                      | 647.0007019                          | 12938.23628                             | -35.2815094                                 |
| 4.110881818                            | 106.8741152                                      | 682.9691162                          | 11422.07649                             | -67.28707275                                |
| 4.014982835                            | 103.9274444                                      | 754.9850769                          | 10800.91371                             | -9.52615509                                 |
| 4.159619088                            | 110.4627908                                      | 944.6410217                          | 12202.02815                             | -43.46726837                                |
| 4.214273893                            | 115.1435313                                      | 719.2866211                          | 13258.03281                             | -28.48638115                                |
| 4.167968067                            | 111.9630045                                      | 840.7598267                          | 12535.71437                             | 23.85098343                                 |
| 4.160066099                            | 121.0555341                                      | 896.0319519                          | 14654.44233                             | 7.034891605                                 |
| 4.049836491                            | 107.2720531                                      | 538.4684906                          | 11507.29338                             | -1.209183216                                |
| 3.918291733                            | 94.98347984                                      | 474.6218719                          | 9021.861443                             | -56.23178749                                |
| 3.840679841                            | 89.0003346                                       | 557.9430237                          | 7921.059559                             | -0.235088757                                |
| 4.406091911                            | 132.1137259                                      | 936.4787598                          | 17454.03657                             | -25.92233696                                |
| 3.869060664                            | 90.45122479                                      | 619.708374                           | 8181.424067                             | -3.890602827                                |
| 3.652210452                            | 80.93695314                                      | 554.5895386                          | 6550.790384                             | -15.87795496                                |
| 3.888789268                            | 100.018667                                       | 520.9815598                          | 10003.73374                             | 23.24343586                                 |
| 3.810348242                            | 88.03313907                                      | 484.1198883                          | 7749.833575                             | 3.719556928                                 |
| 3.785771701                            | 86.80646461                                      | 544.641922                           | 7535.362299                             | 18.47202721                                 |
| 3.853749648                            | 92.65779916                                      | 643.411377                           | 8585.467745                             | 24.79972916                                 |
| 3.947312242                            | 102.691056                                       | 561.7687836                          | 10545.45297                             | 3.633896208                                 |
| 4.327068648                            | 128.32089041                                     | 783.2564697                          | 16468.30763                             | -103.5255676                                |
| 4.122919993                            | 106.1958134                                      | 585.3144836                          | 11277.55078                             | -50.25080719                                |
| 4.220455022                            | 114.5244043                                      | 869.9182129                          | 13115.83918                             | -30.61098862                                |
| 3.855461854                            | 97.16051795                                      | 650.6184387                          | 9440.166249                             | -100.8899193                                |
| 3.744985279                            | 93.1761974                                       | 390.3005066                          | 8681.803761                             | -15.49402142                                |
| 4.072380855                            | 107.9142831                                      | 661.611618                           | 11645.49249                             | 9.416876602                                 |
| 3.987398654                            | 103.066489                                       | 733.8463135                          | 10622.70115                             | 16.42807369                                 |
| 3.576725368                            | 79.60137997                                      | 594.7758331                          | 6336.379694                             | 21.39945602                                 |
| 4.047036631                            | 106.8935445                                      | 668.9227753                          | 11426.22986                             | 42.06848297                                 |
| 4.044124394                            | 104.4795884                                      | 733.3468018                          | 10915.98439                             | -12.07932663                                |
| 4.184552097                            | 111.2136645                                      | 657.0219574                          | 12368.47917                             | 2.962689734                                 |
| 4.389704786                            | 127.794118                                       | 761.1097412                          | 16331.33658                             | -97.14306412                                |
| 4.194381125                            | 115.7015124                                      | 867.6224365                          | 13386.83997                             | -9.985748672                                |
| 3.829842307                            | 100.4471038                                      | 673.3321686                          | 10089.62067                             | 4.408094978                                 |
| 3.920530938                            | 95.55639498                                      | 611.9094391                          | 9131.024622                             | -22.15379772                                |
| 3.494802534                            | 69.15494447                                      | 443.821701                           | 4782.406344                             | 21.65741501                                 |
| 4.138822377                            | 112.7727049                                      | 600.7778931                          | 12717.68297                             | 37.80895233                                 |
| 4.099332841                            | 108.160497                                       | 834.5127258                          | 11698.6931                              | -6.434247208                                |
| 4.029550051                            | 100.5842148                                      | 711.1297913                          | 10117.18427                             | -2.05780865                                 |
| 4.091008205                            | 106.9418794                                      | 525.8055115                          | 11436.56557                             | -17.10298729                                |
| 3.955507767                            | 97.97870513                                      | 552.0838623                          | 9599.826659                             | 9.861934471                                 |
| 4.108030136                            | 112.3851429                                      | 606.3283997                          | 12630.42033                             | 23.68930321                                 |
| 4.221606242                            | 123.1288594                                      | 640.5752106                          | 15160.71602                             | -8.539797592                                |
| 4.219433793                            | 120.4213804                                      | 603.7252197                          | 14501.30885                             | 21.13987064                                 |
| 3.871490576                            | 91.88788526                                      | 515.1850433                          | 8443.383457                             | -7.069479275                                |
| 4.23924048                             | 118.2169587                                      | 776.0697632                          | 13975.24933                             | -32.96044769                                |
| 4.514480887                            | 146.0219821                                      | 823.526886                           | 21322.41926                             | -86.01108856                                |
| 3.784541625                            | 91.92565826                                      | 564.8267059                          | 8450.326647                             | 33.46629333                                 |
| 4.162963761                            | 113.7028567                                      | 875.1216125                          | 12928.33962                             | 19.063311                                   |
| 4.025680363                            | 100.8654229                                      | 727.8635254                          | 10173.83353                             | -16.71190643                                |
| 4.362656721                            | 125.3409198                                      | 937.5799866                          | 15710.34617                             | -14.61962786                                |
| 4.245519688                            | 117.2004898                                      | 851.2111206                          | 13735.9548                              | -31.00496483                                |
| 3.838061402                            | 89.49909604                                      | 618.6089172                          | 8010.088193                             | -16.31679802                                |
| 3.994714784                            | 101.8549651                                      | 589.8483276                          | 10374.43391                             | 10.39028091                                 |
| 3.996927135                            | 99.69785976                                      | 702.3553772                          | 9939.663241                             | -40.09703636                                |
| 4.047965506                            | 106.1827417                                      | 741.8851013                          | 11274.77463                             | -64.16998596                                |
| 4.10224745                             | 116.3214024                                      | 973.4679871                          | 13530.66866                             | -50.4788578                                 |
| 4.296405698                            | 121.4530494                                      | 834.128418                           | 14750.84321                             | -87.43919373                                |
| 4.195356762                            | 115.3989302                                      | 867.7386475                          | 13316.9131                              | 16.82218685                                 |
| 3.370893474                            | 71.17225201                                      | 357.8650513                          | 5065.489456                             | 11.08354549                                 |
| 4.210888294                            | 114.6594632                                      | 762.6219788                          | 13146.79251                             | -17.5847271                                 |
| 4.092853217                            | 108.974493                                       | 620.3519287                          | 11875.44013                             | -77.98955727                                |
| 4.33405902                             | 124.0042211                                      | 761.986145                           | 15377.04685                             | -45.40071449                                |
| 3.845164509                            | 90.64383633                                      | 497.2359467                          | 8216.305064                             | 15.89558487                                 |
| 3.241192563                            | 64.75494422                                      | 280.8766937                          | 4193.202801                             | 40.80340195                                 |
| 3.928805703                            | 98.68554752                                      | 440.3594971                          | 9738.837289                             | -19.09504662                                |
| 4.033078728                            | 103.8153699                                      | 683.4410248                          | 10777.63102                             | 32.02458954                                 |
| 4.090721824                            | 107.2455104                                      | 559.5675507                          | 11501.5995                              | 18.80991936                                 |
| 3.799030442                            | 86.00483575                                      | 544.7645569                          | 7396.831773                             | -64.08424873                                |
| 3.995275543                            | 100.4119918                                      | 728.9804077                          | 10082.56811                             | -21.77381287                                |
| 3.916414114                            | 92.10460411                                      | 577.9814301                          | 8483.258098                             | 35.06903076                                 |
| 4.69535871                             | 168.6208981                                      | 905.0435791                          | 28433.00729                             | -206.8632767                                |
| 3.659461867                            | 84.02897266                                      | 525.4259338                          | 7060.868246                             | 12.77452888                                 |
| 3.892576807                            | 96.71699699                                      | 440.743454                           | 9354.177507                             | 25.40673904                                 |
| 3.656743924                            | 83.60059566                                      | 409.1580887                          | 6989.059595                             | -4.373005867                                |
| 4.544846555                            | 147.2801521                                      | 843.2960205                          | 21691.44321                             | -143.8250534                                |

| log.sigma.5.0.mm.3D_firstorder_Kurtosis | log.sigma.5.0.mm.3D_firstorder_Mean | log.sigma.5.0.mm.3D_glrIm_ShortRunLowGrayLevelEmphasis | log.sigma.5.0.mm.3D_glrIm_GrayLevelVariance |
|-----------------------------------------|-------------------------------------|--------------------------------------------------------|---------------------------------------------|
| 2.268858841                             | 159.4340946                         | 0.008716054                                            | 26.99951789                                 |
| 3.456623513                             | 127.0570211                         | 0.004219893                                            | 18.28301224                                 |
| 3.096748592                             | 27.85632748                         | 0.007948432                                            | 18.93690846                                 |
| 2.792137914                             | 140.1139399                         | 0.013877705                                            | 17.0951292                                  |
| 2.338014468                             | 87.99563972                         | 0.016752216                                            | 17.86947416                                 |
| 3.161187354                             | 81.695806                           | 0.012510432                                            | 15.8123207                                  |
| 1.868804974                             | 90.66221836                         | 0.033170043                                            | 13.472879                                   |
| 3.077835267                             | 153.8339651                         | 0.006762471                                            | 24.00003233                                 |
| 2.424549011                             | 149.6528948                         | 0.006800133                                            | 20.89063555                                 |
| 3.55114313                              | 126.7648354                         | 0.002607958                                            | 23.74922075                                 |
| 2.609992514                             | 112.2067034                         | 0.020020475                                            | 10.88863464                                 |
| 3.467983131                             | 110.7339653                         | 0.00605022                                             | 16.15987437                                 |
| 3.125425925                             | 95.81098558                         | 0.010439344                                            | 12.85557404                                 |
| 2.564326494                             | 89.51833354                         | 0.014222244                                            | 13.84805938                                 |
| 3.228665411                             | 126.2455051                         | 0.006471097                                            | 26.36003748                                 |
| 3.179890285                             | 76.4970502                          | 0.004640092                                            | 24.72709429                                 |
| 3.965499317                             | 70.03965459                         | 0.004949874                                            | 19.97884751                                 |
| 2.934740266                             | 166.8647963                         | 0.005572886                                            | 18.99034204                                 |
| 2.946631629                             | 122.8602725                         | 0.00593394                                             | 13.15134266                                 |
| 3.387021804                             | 110.480299                          | 0.008313195                                            | 18.56985009                                 |
| 3.484375972                             | 59.27322101                         | 0.003460222                                            | 18.35851561                                 |
| 3.392003707                             | 100.6315844                         | 0.00636267                                             | 19.79460264                                 |
| 3.434373446                             | 88.56351219                         | 0.004034765                                            | 21.4854131                                  |
| 2.266993929                             | 93.96624731                         | 0.016065843                                            | 21.31675923                                 |
| 2.705798138                             | 23.97713494                         | 0.009885969                                            | 22.43392801                                 |
| 3.406055701                             | 130.3613523                         | 0.007794718                                            | 23.91505474                                 |
| 2.416529603                             | 100.2330459                         | 0.007059582                                            | 21.00020041                                 |
| 2.983740868                             | 76.24516542                         | 0.005433914                                            | 18.51787262                                 |
| 4.64307955                              | 104.7950113                         | 0.003634922                                            | 18.18195311                                 |
| 3.763142543                             | 94.86974359                         | 0.002909199                                            | 20.67167089                                 |
| 3.422257349                             | 106.4690791                         | 0.004756375                                            | 21.96018912                                 |
| 3.938764253                             | 148.3680656                         | 0.004343243                                            | 20.74590296                                 |
| 5.352211036                             | 120.0542121                         | 0.002894597                                            | 24.95416133                                 |
| 2.240979079                             | 128.0115218                         | 0.013387722                                            | 18.53095888                                 |
| 2.817937149                             | 66.89920888                         | 0.022774889                                            | 14.88483855                                 |
| 3.066779616                             | 103.3810927                         | 0.00723476                                             | 13.19073882                                 |
| 3.521206013                             | 131.179728                          | 0.00385665                                             | 29.00719572                                 |
| 3.364030477                             | 104.7364252                         | 0.005498753                                            | 13.69875846                                 |
| 3.431448248                             | 72.79170664                         | 0.008240821                                            | 11.16440173                                 |
| 2.475145887                             | 133.2731823                         | 0.012831719                                            | 16.52506211                                 |
| 2.428798981                             | 111.898531                          | 0.009848693                                            | 12.84305147                                 |
| 2.577951271                             | 121.0316296                         | 0.008151085                                            | 12.38675035                                 |
| 2.920899059                             | 128.0178954                         | 0.00544022                                             | 14.06500835                                 |
| 2.678027273                             | 113.3788894                         | 0.010378159                                            | 17.63571332                                 |
| 3.474603235                             | 69.17116087                         | 0.004467056                                            | 28.07551138                                 |
| 2.607881495                             | 91.25465587                         | 0.012845699                                            | 18.18112038                                 |
| 3.869332803                             | 108.0448667                         | 0.003530096                                            | 21.86385727                                 |
| 4.398349374                             | 30.28804275                         | 0.006037998                                            | 16.41918152                                 |
| 1.972064118                             | 92.7200728                          | 0.020420611                                            | 13.73479665                                 |
| 2.79965398                              | 132.4676172                         | 0.00748736                                             | 19.10063104                                 |
| 3.3336522                               | 124.4689953                         | 0.003996698                                            | 17.96327035                                 |
| 4.641861932                             | 97.70376777                         | 0.007357329                                            | 11.22766184                                 |
| 2.530894516                             | 161.7735057                         | 0.006604933                                            | 18.77630563                                 |
| 3.26913164                              | 104.0700642                         | 0.003868205                                            | 17.92210895                                 |
| 2.741314743                             | 144.0479043                         | 0.00541859                                             | 20.26435348                                 |
| 3.015983099                             | 73.59085555                         | 0.006408867                                            | 27.04501215                                 |
| 4.476660868                             | 115.5496393                         | 0.003358572                                            | 22.36011448                                 |
| 3.755498817                             | 96.77458197                         | 0.008493907                                            | 17.60300405                                 |
| 3.355363838                             | 87.35230119                         | 0.008284593                                            | 15.10250234                                 |
| 3.116250408                             | 110.0998995                         | 0.009174834                                            | 7.982691761                                 |
| 2.179604954                             | 174.2209772                         | 0.007775882                                            | 20.62952063                                 |
| 3.790094935                             | 113.5069631                         | 0.003830673                                            | 19.57366253                                 |
| 3.539596858                             | 122.3849626                         | 0.004553666                                            | 16.91554486                                 |
| 2.290074854                             | 127.2652507                         | 0.01251452                                             | 18.32319311                                 |
| 2.524754372                             | 134.4751657                         | 0.009080916                                            | 15.63081899                                 |
| 2.493627071                             | 153.28554                           | 0.017097093                                            | 20.48876644                                 |
| 2.773273075                             | 125.6229717                         | 0.016145577                                            | 24.98469643                                 |
| 2.32895566                              | 161.9436139                         | 0.01012913                                             | 23.63512253                                 |
| 2.516162516                             | 105.820315                          | 0.007379268                                            | 13.75706727                                 |
| 3.196242103                             | 106.132314                          | 0.004688796                                            | 23.0973103                                  |
| 3.005928154                             | 115.5973283                         | 0.005730629                                            | 34.37812797                                 |
| 3.085229311                             | 129.5728915                         | 0.009142591                                            | 14.38435997                                 |
| 4.260898384                             | 140.1215351                         | 0.003554294                                            | 21.3928773                                  |
| 3.524018777                             | 113.6911414                         | 0.003892872                                            | 16.65958624                                 |
| 3.307462948                             | 134.0358355                         | 0.004760289                                            | 25.99455554                                 |
| 3.31314281                              | 109.4852468                         | 0.004860844                                            | 22.79397932                                 |
| 3.641613301                             | 81.865145                           | 0.00647708                                             | 13.74757592                                 |
| 3.093345075                             | 119.3682233                         | 0.009638027                                            | 16.9654782                                  |
| 3.549854181                             | 90.40522507                         | 0.005338467                                            | 16.52752238                                 |
| 4.208489315                             | 64.5811363                          | 0.00451218                                             | 19.05856114                                 |
| 5.990438774                             | 70.58894557                         | 0.002887392                                            | 23.5439727                                  |
| 3.537483427                             | 70.83684222                         | 0.004265976                                            | 24.34408016                                 |
| 3.504629437                             | 142.8455321                         | 0.003832872                                            | 21.97300238                                 |
| 2.100461403                             | 88.87011072                         | 0.017667608                                            | 8.415998264                                 |
| 3.698017559                             | 128.2269                            | 0.005193081                                            | 21.50366923                                 |
| 2.513553364                             | 120.8422864                         | 0.01300551                                             | 19.15754488                                 |
| 3.116006035                             | 112.0758379                         | 0.006171935                                            | 25.636531                                   |
| 2.406137002                             | 123.3346628                         | 0.010824946                                            | 13.44306463                                 |
| 2.208398301                             | 128.4074744                         | 0.024939344                                            | 6.64508434                                  |
| 2.405173394                             | 104.6156292                         | 0.022996281                                            | 15.84044025                                 |
| 2.588325681                             | 151.3883365                         | 0.004375631                                            | 17.65827137                                 |
| 2.585936573                             | 114.4500415                         | 0.010190614                                            | 18.81459435                                 |
| 3.557586666                             | 45.0866174                          | 0.009179284                                            | 12.30959254                                 |
| 3.785823068                             | 93.93315489                         | 0.004396182                                            | 17.27904148                                 |
| 3.090460068                             | 146.264756                          | 0.008145252                                            | 14.01723525                                 |
| 3.268741003                             | 24.11674496                         | 0.005275068                                            | 46.27218787                                 |
| 2.792565622                             | 103.5711062                         | 0.007785514                                            | 11.77005338                                 |
| 2.077113564                             | 147.2018522                         | 0.022495981                                            | 14.80276407                                 |
| 2.402474058                             | 93.08894727                         | 0.017046064                                            | 11.64366293                                 |
| 3.175969024                             | 55.83274792                         | 0.009077793                                            | 35.17655441                                 |

| log.sigma.5.0.mm.3D_glrIm_LowGrayLevelRunEmphasis | log.sigma.5.0.mm.3D_glrIm_GrayLevelNonUniformityNormalized | log.sigma.5.0.mm.3D_glrIm_RunVariance | log.sigma.5.0.mm.3D_glrIm_GrayLevelNonUniformity |
|---------------------------------------------------|------------------------------------------------------------|---------------------------------------|--------------------------------------------------|
| 0.009350173                                       | 0.053511106                                                | 0.155102996                           | 57.56495016                                      |
| 0.004562943                                       | 0.071134938                                                | 0.201940352                           | 123.8012136                                      |
| 0.00847689                                        | 0.069053057                                                | 0.161451466                           | 68.45209186                                      |
| 0.015253457                                       | 0.070992098                                                | 0.223053731                           | 151.0625878                                      |
| 0.018807805                                       | 0.075469993                                                | 0.256138382                           | 60.77981001                                      |
| 0.014069003                                       | 0.084408534                                                | 0.262483197                           | 116.1632065                                      |
| 0.041394189                                       | 0.092916125                                                | 0.439863446                           | 77.19489376                                      |
| 0.007350725                                       | 0.059994975                                                | 0.212364017                           | 94.3231696                                       |
| 0.007379132                                       | 0.062914928                                                | 0.2101039                             | 111.7639479                                      |
| 0.002786522                                       | 0.059349335                                                | 0.161339956                           | 158.5794192                                      |
| 0.022712055                                       | 0.089975497                                                | 0.322509561                           | 134.5490758                                      |
| 0.006497969                                       | 0.072954326                                                | 0.174794679                           | 108.6810461                                      |
| 0.011747897                                       | 0.083500794                                                | 0.357238268                           | 201.5409577                                      |
| 0.015431448                                       | 0.074852342                                                | 0.185653671                           | 122.3540887                                      |
| 0.006984066                                       | 0.05986416                                                 | 0.187982673                           | 81.45683309                                      |
| 0.005138184                                       | 0.059133075                                                | 0.284888872                           | 208.1390707                                      |
| 0.005299009                                       | 0.068985578                                                | 0.210363546                           | 96.30280126                                      |
| 0.006242055                                       | 0.066696245                                                | 0.286187995                           | 144.3184462                                      |
| 0.006367108                                       | 0.07910903                                                 | 0.176693044                           | 79.28352315                                      |
| 0.009213055                                       | 0.071218067                                                | 0.236565764                           | 176.2470659                                      |
| 0.003796911                                       | 0.069565388                                                | 0.209243275                           | 417.4847379                                      |
| 0.006892605                                       | 0.066339638                                                | 0.195965552                           | 123.1241188                                      |
| 0.004386244                                       | 0.064575546                                                | 0.184262458                           | 233.8675276                                      |
| 0.017511405                                       | 0.063018185                                                | 0.215757065                           | 56.93085348                                      |
| 0.010736378                                       | 0.060797276                                                | 0.160825069                           | 141.2573376                                      |
| 0.008214505                                       | 0.062706568                                                | 0.156787716                           | 75.94986085                                      |
| 0.007561448                                       | 0.061816657                                                | 0.171201776                           | 121.3362786                                      |
| 0.005806558                                       | 0.066579062                                                | 0.147411491                           | 200.7692773                                      |
| 0.003925665                                       | 0.075250096                                                | 0.240664702                           | 221.9632258                                      |
| 0.003116083                                       | 0.066282689                                                | 0.195060132                           | 184.1354816                                      |
| 0.005176355                                       | 0.063864858                                                | 0.199100393                           | 229.6195984                                      |
| 0.004794579                                       | 0.0655529                                                  | 0.203149179                           | 287.3296453                                      |
| 0.003142715                                       | 0.06787375                                                 | 0.260767373                           | 146.422293                                       |
| 0.014414079                                       | 0.065646652                                                | 0.177354104                           | 27.73871286                                      |
| 0.024790622                                       | 0.074366454                                                | 0.221602399                           | 56.76201614                                      |
| 0.007962159                                       | 0.080900497                                                | 0.242694818                           | 222.8663717                                      |
| 0.004110466                                       | 0.056248594                                                | 0.169268811                           | 178.7280233                                      |
| 0.006028415                                       | 0.079391325                                                | 0.23560987                            | 230.6507591                                      |
| 0.009366018                                       | 0.094001897                                                | 0.363674445                           | 113.805174                                       |
| 0.014460878                                       | 0.076002972                                                | 0.297731146                           | 104.0326069                                      |
| 0.010695006                                       | 0.078766366                                                | 0.199139642                           | 90.31761649                                      |
| 0.00910267                                        | 0.080434855                                                | 0.245357341                           | 132.6419563                                      |
| 0.006024244                                       | 0.07834025                                                 | 0.29396292                            | 199.0654777                                      |
| 0.011587703                                       | 0.074325745                                                | 0.288388301                           | 118.4743483                                      |
| 0.004828038                                       | 0.058551105                                                | 0.261460449                           | 174.9318905                                      |
| 0.014189524                                       | 0.064599506                                                | 0.201980756                           | 200.9949072                                      |
| 0.003813687                                       | 0.063501178                                                | 0.186454232                           | 205.5447469                                      |
| 0.006525248                                       | 0.084045245                                                | 0.263982452                           | 107.2761707                                      |
| 0.023034122                                       | 0.079834488                                                | 0.237923877                           | 38.68592463                                      |
| 0.008276431                                       | 0.066181293                                                | 0.243015952                           | 61.95296331                                      |
| 0.004457704                                       | 0.073721636                                                | 0.313110021                           | 245.3246705                                      |
| 0.008283177                                       | 0.101891321                                                | 0.397791814                           | 160.0072128                                      |
| 0.007404038                                       | 0.067700063                                                | 0.261624522                           | 217.9561952                                      |
| 0.004133946                                       | 0.069895937                                                | 0.184122663                           | 71.78571184                                      |
| 0.005862293                                       | 0.061820923                                                | 0.210579094                           | 213.5767214                                      |
| 0.006903784                                       | 0.05552893                                                 | 0.169880088                           | 92.78860168                                      |
| 0.003626869                                       | 0.064944458                                                | 0.198352298                           | 187.4464518                                      |
| 0.009922284                                       | 0.083939053                                                | 0.446622815                           | 163.0779447                                      |
| 0.008960169                                       | 0.079055214                                                | 0.186226184                           | 94.92304931                                      |
| 0.010137471                                       | 0.101314728                                                | 0.259055567                           | 119.7261347                                      |
| 0.00871761                                        | 0.061089672                                                | 0.249528609                           | 153.0964666                                      |
| 0.004184277                                       | 0.07046631                                                 | 0.244762845                           | 331.71118                                        |
| 0.004938228                                       | 0.07195563                                                 | 0.208544098                           | 141.5878071                                      |
| 0.013247153                                       | 0.063915602                                                | 0.146067569                           | 107.6577037                                      |
| 0.009547665                                       | 0.071424559                                                | 0.127711794                           | 38.02690536                                      |
| 0.018709256                                       | 0.064861653                                                | 0.168232775                           | 88.69772776                                      |
| 0.018285918                                       | 0.060379994                                                | 0.219324831                           | 54.69840588                                      |
| 0.011086723                                       | 0.059352598                                                | 0.200100138                           | 184.552496                                       |
| 0.008061863                                       | 0.076241662                                                | 0.206771448                           | 85.27098206                                      |
| 0.005095115                                       | 0.062450588                                                | 0.199953482                           | 136.3096914                                      |
| 0.006127927                                       | 0.050495633                                                | 0.140878094                           | 173.2692712                                      |
| 0.010051793                                       | 0.085501935                                                | 0.276375633                           | 149.6982464                                      |
| 0.003876716                                       | 0.066638833                                                | 0.217229493                           | 271.562106                                       |
| 0.004234967                                       | 0.073044567                                                | 0.205814932                           | 414.3818758                                      |
| 0.005158327                                       | 0.056515984                                                | 0.187024687                           | 211.7722039                                      |
| 0.005230944                                       | 0.061119848                                                | 0.189850431                           | 125.1731755                                      |
| 0.007132985                                       | 0.081880798                                                | 0.296876142                           | 161.5372309                                      |
| 0.010378345                                       | 0.072993319                                                | 0.204193109                           | 86.60682242                                      |
| 0.005787573                                       | 0.075326942                                                | 0.203062668                           | 214.9394658                                      |
| 0.004910497                                       | 0.074797058                                                | 0.243701116                           | 285.1376047                                      |
| 0.00306401                                        | 0.075081537                                                | 0.216041851                           | 89.12786957                                      |
| 0.004543521                                       | 0.060936866                                                | 0.150359125                           | 144.8238745                                      |
| 0.004119006                                       | 0.065464095                                                | 0.180485337                           | 143.1054261                                      |
| 0.020534224                                       | 0.102696974                                                | 0.357512756                           | 43.55966303                                      |
| 0.005613726                                       | 0.0644328                                                  | 0.171670057                           | 219.1483475                                      |
| 0.014748656                                       | 0.064736877                                                | 0.271331198                           | 189.6569564                                      |
| 0.006565616                                       | 0.057755492                                                | 0.145044467                           | 73.70606877                                      |
| 0.012035637                                       | 0.077407536                                                | 0.250296808                           | 201.2865595                                      |
| 0.026526275                                       | 0.113541269                                                | 0.241601683                           | 40.70736174                                      |
| 0.024948486                                       | 0.072006294                                                | 0.185415515                           | 36.60140436                                      |
| 0.004803592                                       | 0.068264877                                                | 0.213722217                           | 190.583455                                       |
| 0.01089101                                        | 0.066286902                                                | 0.167877773                           | 64.92271422                                      |
| 0.009915896                                       | 0.085371473                                                | 0.18298283                            | 116.1505477                                      |
| 0.004889301                                       | 0.075955398                                                | 0.264138423                           | 279.085312                                       |
| 0.009025188                                       | 0.077160363                                                | 0.23793411                            | 312.1415974                                      |
| 0.00550344                                        | 0.045811451                                                | 0.095630943                           | 37.6650843                                       |
| 0.008766979                                       | 0.090783231                                                | 0.295779696                           | 133.6927399                                      |
| 0.024935799                                       | 0.072838081                                                | 0.19203761                            | 27.42948957                                      |
| 0.019524387                                       | 0.086947725                                                | 0.303401781                           | 63.85437398                                      |
| 0.009696518                                       | 0.051570537                                                | 0.09244802                            | 55.0710637                                       |

| log.sigma.5.0.mm.3D_glrIm_LongRunEmphasis | log.sigma.5.0.mm.3D_glrIm_ShortRunHighGrayLevelEmphasis | log.sigma.5.0.mm.3D_glrIm_RunLengthNonUniformity | log.sigma.5.0.mm.3D_glrIm_ShortRunEmphasis |
|-------------------------------------------|---------------------------------------------------------|--------------------------------------------------|--------------------------------------------|
| 1.409039716                               | 233.8069301                                             | 881.8264823                                      | 0.923119907                                |
| 1.53323414                                | 331.6602622                                             | 1360.02937                                       | 0.903432011                                |
| 1.443505686                               | 208.2467906                                             | 798.243919                                       | 0.914541275                                |
| 1.566681599                               | 130.159471                                              | 1663.918192                                      | 0.903164446                                |
| 1.66226139                                | 130.2805004                                             | 606.0982746                                      | 0.887926441                                |
| 1.696819521                               | 119.6505339                                             | 1012.588681                                      | 0.879180069                                |
| 2.100665109                               | 62.19517363                                             | 557.6425824                                      | 0.841393822                                |
| 1.539439359                               | 276.1009598                                             | 1239.095853                                      | 0.906596041                                |
| 1.51895973                                | 214.5940782                                             | 1419.378938                                      | 0.912309907                                |
| 1.429723842                               | 529.8676862                                             | 2169.92327                                       | 0.918895534                                |
| 1.798313648                               | 83.1133693                                              | 1085.327631                                      | 0.873976811                                |
| 1.464277519                               | 245.2909052                                             | 1194.619276                                      | 0.913599525                                |
| 1.849366204                               | 127.6742934                                             | 1754.993748                                      | 0.874516539                                |
| 1.485468388                               | 123.3596481                                             | 1304.732268                                      | 0.911663513                                |
| 1.494941619                               | 248.0829296                                             | 1085.685657                                      | 0.910598347                                |
| 1.661577667                               | 340.1013533                                             | 2730.342263                                      | 0.89999641                                 |
| 1.554723372                               | 317.0497051                                             | 1089.564093                                      | 0.901413697                                |
| 1.699962749                               | 228.48881                                               | 1632.548384                                      | 0.889079803                                |
| 1.471901555                               | 227.410663                                              | 804.8309996                                      | 0.913176263                                |
| 1.622382985                               | 217.9807665                                             | 1870.737949                                      | 0.890548847                                |
| 1.558125454                               | 335.2907879                                             | 4624.157316                                      | 0.898269176                                |
| 1.512992923                               | 236.7153225                                             | 1461.526589                                      | 0.906245323                                |
| 1.485850543                               | 318.8584205                                             | 2875.432547                                      | 0.910305906                                |
| 1.537197511                               | 158.6974279                                             | 719.1962334                                      | 0.908905376                                |
| 1.425503741                               | 210.7522429                                             | 1901.04556                                       | 0.920875605                                |
| 1.408053603                               | 252.5960774                                             | 995.3194339                                      | 0.923759054                                |
| 1.448509563                               | 211.6971797                                             | 1597.301692                                      | 0.918737105                                |
| 1.391167312                               | 266.6362618                                             | 2489.825177                                      | 0.925285969                                |
| 1.591817344                               | 364.6693766                                             | 2322.527765                                      | 0.904667842                                |
| 1.496993648                               | 429.5920081                                             | 2222.298595                                      | 0.912785411                                |
| 1.534839824                               | 302.0152218                                             | 2791.749267                                      | 0.901185576                                |
| 1.512571768                               | 364.3996995                                             | 3496.261526                                      | 0.911345469                                |
| 1.650793321                               | 554.1666419                                             | 1637.350571                                      | 0.892290358                                |
| 1.481090412                               | 166.5023325                                             | 335.7793119                                      | 0.909505959                                |
| 1.591309787                               | 105.5745793                                             | 586.2602975                                      | 0.894747109                                |
| 1.61535866                                | 179.2992621                                             | 2104.712776                                      | 0.895045942                                |
| 1.437753575                               | 420.9551099                                             | 2590.948367                                      | 0.920317472                                |
| 1.608223368                               | 231.7028582                                             | 2214.985427                                      | 0.894242197                                |
| 1.909364748                               | 146.1309932                                             | 854.5749795                                      | 0.860184938                                |
| 1.738797471                               | 123.7292022                                             | 1010.347524                                      | 0.88093627                                 |
| 1.525856126                               | 142.900119                                              | 901.6084954                                      | 0.905297451                                |
| 1.627817318                               | 150.9126841                                             | 1255.200945                                      | 0.892666546                                |
| 1.729084081                               | 232.1940844                                             | 1888.016443                                      | 0.883355752                                |
| 1.70343531                                | 151.1531944                                             | 1203.120303                                      | 0.888956527                                |
| 1.64343302                                | 354.0175487                                             | 2288.746076                                      | 0.895397684                                |
| 1.529428141                               | 148.0303606                                             | 2431.215694                                      | 0.903881906                                |
| 1.491264973                               | 414.8940128                                             | 2573.498075                                      | 0.910209123                                |
| 1.692308156                               | 252.7291856                                             | 941.5830562                                      | 0.880748376                                |
| 1.639462711                               | 92.21597991                                             | 372.9583341                                      | 0.891481319                                |
| 1.614028741                               | 195.7629976                                             | 722.2063655                                      | 0.897836734                                |
| 1.761432163                               | 322.4196383                                             | 2465.647382                                      | 0.882201029                                |
| 1.975137931                               | 190.6549577                                             | 1087.003082                                      | 0.855361848                                |
| 1.662880786                               | 195.9716141                                             | 2427.775679                                      | 0.889658433                                |
| 1.495663405                               | 366.3192665                                             | 812.2563217                                      | 0.907579371                                |
| 1.515298929                               | 259.1888354                                             | 2767.29965                                       | 0.913183967                                |
| 1.454181301                               | 274.7480567                                             | 1342.944143                                      | 0.914694659                                |
| 1.499076672                               | 470.3345309                                             | 2314.865145                                      | 0.913448396                                |
| 2.053756413                               | 156.872354                                              | 1339.256202                                      | 0.853389585                                |
| 1.502729499                               | 191.7489024                                             | 942.8579796                                      | 0.905088003                                |
| 1.687958745                               | 130.0002523                                             | 868.9450902                                      | 0.879533158                                |
| 1.635170525                               | 186.7026735                                             | 1902.256526                                      | 0.892286816                                |
| 1.617226833                               | 342.9339551                                             | 3620.663281                                      | 0.896616384                                |
| 1.553851484                               | 287.2733892                                             | 1531.243328                                      | 0.900837349                                |
| 1.381774722                               | 160.438985                                              | 1401.680507                                      | 0.928372489                                |
| 1.3619414                                 | 191.4640266                                             | 440.4673532                                      | 0.925726371                                |
| 1.450627411                               | 126.2064093                                             | 1104.218251                                      | 0.915776854                                |
| 1.595680568                               | 150.1351228                                             | 687.0503621                                      | 0.891401769                                |
| 1.523055417                               | 177.3795726                                             | 2442.7713                                        | 0.905906331                                |
| 1.554936415                               | 181.2131358                                             | 866.4451726                                      | 0.898749864                                |
| 1.528535752                               | 309.4586889                                             | 1707.740501                                      | 0.904032612                                |
| 1.378506986                               | 367.98412                                               | 2847.929303                                      | 0.927093505                                |
| 1.685838684                               | 160.1382502                                             | 1323.280627                                      | 0.889431008                                |
| 1.545670771                               | 388.8926911                                             | 3214.08964                                       | 0.906986186                                |
| 1.530096622                               | 306.1945972                                             | 4459.103392                                      | 0.906056068                                |
| 1.489318097                               | 318.4889299                                             | 2984.552438                                      | 0.911055466                                |
| 1.492916527                               | 312.8481497                                             | 1633.402193                                      | 0.911588135                                |
| 1.739647774                               | 204.2234638                                             | 1463.040452                                      | 0.882152747                                |
| 1.528974075                               | 200.4287883                                             | 936.8007869                                      | 0.906799501                                |
| 1.53394447                                | 247.5268933                                             | 2233.187239                                      | 0.903825685                                |
| 1.622688124                               | 306.3074705                                             | 2903.412751                                      | 0.893168743                                |
| 1.546168125                               | 553.5745015                                             | 932.322882                                       | 0.905424993                                |
| 1.406701484                               | 363.9242178                                             | 1940.858478                                      | 0.921007609                                |
| 1.471211829                               | 360.7082633                                             | 1755.135663                                      | 0.914219178                                |
| 1.945912123                               | 82.76545832                                             | 299.7260396                                      | 0.852710063                                |
| 1.467995068                               | 333.3202463                                             | 2706.05638                                       | 0.910575682                                |
| 1.69041657                                | 136.1279068                                             | 2182.752724                                      | 0.884814126                                |
| 1.403307596                               | 289.8544075                                             | 1037.992311                                      | 0.919610194                                |
| 1.635321895                               | 131.0263339                                             | 1983.28977                                       | 0.893204336                                |
| 1.642667588                               | 70.16283357                                             | 288.3867755                                      | 0.899731749                                |
| 1.492666839                               | 117.5191907                                             | 404.6986852                                      | 0.909794112                                |
| 1.545594568                               | 268.5932272                                             | 2190.85081                                       | 0.90520312                                 |
| 1.450040936                               | 173.8754537                                             | 790.4509584                                      | 0.915532581                                |
| 1.507803517                               | 167.5763986                                             | 1057.291828                                      | 0.901893185                                |
| 1.679636247                               | 279.6077728                                             | 2734.914201                                      | 0.884644                                   |
| 1.60398798                                | 172.8476505                                             | 3110.311372                                      | 0.897018653                                |
| 1.255942858                               | 515.932141                                              | 719.362573                                       | 0.948248207                                |
| 1.752695032                               | 155.0133224                                             | 1084.305493                                      | 0.878192605                                |
| 1.504704986                               | 96.07827766                                             | 301.3002972                                      | 0.910505928                                |
| 1.788358312                               | 88.20974751                                             | 527.9873656                                      | 0.869554538                                |
| 1.263143036                               | 325.061807                                              | 921.7595761                                      | 0.943319822                                |

| log.sigma.5.0.mm.3D_glrIm_LongRunHighGrayLevelEmphasis | log.sigma.5.0.mm.3D_glrIm_RunPercentage | log.sigma.5.0.mm.3D_glrIm_LongRunLowGrayLevelEmphasis | log.sigma.5.0.mm.3D_glrIm_RunEntropy |
|--------------------------------------------------------|-----------------------------------------|-------------------------------------------------------|--------------------------------------|
| 339.9581929                                            | 0.894110877                             | 0.012625419                                           | 4.860809279                          |
| 547.0821996                                            | 0.869884615                             | 0.006460972                                           | 4.665254837                          |
| 341.511762                                             | 0.886473098                             | 0.011084316                                           | 4.620784146                          |
| 212.6800077                                            | 0.866787921                             | 0.022919715                                           | 4.641347563                          |
| 215.0532136                                            | 0.847693929                             | 0.03043545                                            | 4.591073673                          |
| 213.717259                                             | 0.839485301                             | 0.022854371                                           | 4.5831114571                         |
| 116.8071983                                            | 0.784295175                             | 0.099768738                                           | 4.424204975                          |
| 454.9400746                                            | 0.870786277                             | 0.010449896                                           | 4.883038871                          |
| 337.987018                                             | 0.876209632                             | 0.010909761                                           | 4.730349952                          |
| 829.3962802                                            | 0.889751274                             | 0.003703879                                           | 4.829601828                          |
| 156.6877885                                            | 0.827338129                             | 0.039447026                                           | 4.429000234                          |
| 393.4603933                                            | 0.883725177                             | 0.008799957                                           | 4.575822985                          |
| 248.5808657                                            | 0.823305407                             | 0.020559104                                           | 4.595072371                          |
| 204.0533314                                            | 0.879812867                             | 0.021770836                                           | 4.478113637                          |
| 389.848213                                             | 0.878851123                             | 0.009845307                                           | 4.866109735                          |
| 587.4353587                                            | 0.856075781                             | 0.008158358                                           | 4.955962642                          |
| 550.8611804                                            | 0.868727534                             | 0.007196266                                           | 4.751796768                          |
| 405.3193476                                            | 0.845432128                             | 0.010562019                                           | 4.795713801                          |
| 370.332076                                             | 0.882313109                             | 0.008661308                                           | 4.404293047                          |
| 381.7250943                                            | 0.852729828                             | 0.013959668                                           | 4.756596829                          |
| 582.7998084                                            | 0.863453237                             | 0.005620781                                           | 4.765144997                          |
| 393.4636532                                            | 0.874913865                             | 0.009647504                                           | 4.751117142                          |
| 507.5228339                                            | 0.878558229                             | 0.006252605                                           | 4.798539166                          |
| 255.174993                                             | 0.876101568                             | 0.025069216                                           | 4.68666836                           |
| 332.8003458                                            | 0.892414038                             | 0.015467074                                           | 4.746911681                          |
| 371.0181746                                            | 0.895653163                             | 0.010532122                                           | 4.774725278                          |
| 335.130547                                             | 0.887694395                             | 0.010345378                                           | 4.707809975                          |
| 412.3644573                                            | 0.89875043                              | 0.007644841                                           | 4.617575537                          |
| 645.9299525                                            | 0.866906556                             | 0.005673633                                           | 4.662140096                          |
| 710.5359217                                            | 0.878953905                             | 0.004275964                                           | 4.765989313                          |
| 520.1783821                                            | 0.867938194                             | 0.007327169                                           | 4.859095207                          |
| 595.658313                                             | 0.876630769                             | 0.00709591                                            | 4.775050389                          |
| 999.7939886                                            | 0.851502902                             | 0.004545862                                           | 4.871245796                          |
| 252.2647334                                            | 0.878298417                             | 0.019926773                                           | 4.577860906                          |
| 187.2889682                                            | 0.859580735                             | 0.035296591                                           | 4.558116262                          |
| 316.3712207                                            | 0.856053179                             | 0.012139184                                           | 4.525625407                          |
| 659.8540012                                            | 0.8900791                               | 0.005425336                                           | 4.958902775                          |
| 416.4922847                                            | 0.856452601                             | 0.00896189                                            | 4.559526636                          |
| 301.9929146                                            | 0.814379017                             | 0.016734753                                           | 4.497493452                          |
| 215.5672558                                            | 0.836232838                             | 0.02495704                                            | 4.642605236                          |
| 234.4268402                                            | 0.871171382                             | 0.015428727                                           | 4.42527012                           |
| 257.1252513                                            | 0.853559484                             | 0.014850701                                           | 4.468510463                          |
| 434.5572571                                            | 0.838860512                             | 0.009736795                                           | 4.594051011                          |
| 259.1431271                                            | 0.845133105                             | 0.019188902                                           | 4.670379421                          |
| 654.4478966                                            | 0.854387742                             | 0.006930256                                           | 5.022971555                          |
| 255.7933102                                            | 0.87020979                              | 0.021235092                                           | 4.732212447                          |
| 672.8142894                                            | 0.877958179                             | 0.005290434                                           | 4.827558903                          |
| 510.527804                                             | 0.840927542                             | 0.009168888                                           | 4.619907438                          |
| 152.701305                                             | 0.857337698                             | 0.038145545                                           | 4.351246671                          |
| 323.4528183                                            | 0.858574453                             | 0.012980682                                           | 4.719076186                          |
| 615.3261714                                            | 0.834569045                             | 0.007299732                                           | 4.773991081                          |
| 419.2922635                                            | 0.801557338                             | 0.014163391                                           | 4.497978548                          |
| 340.3434549                                            | 0.847531452                             | 0.012329585                                           | 4.765341491                          |
| 603.4742403                                            | 0.877028181                             | 0.005571175                                           | 4.624991135                          |
| 429.9531971                                            | 0.877474063                             | 0.008394585                                           | 4.772141448                          |
| 427.2078082                                            | 0.884859844                             | 0.009411613                                           | 4.947447526                          |
| 756.9616041                                            | 0.879864874                             | 0.005059323                                           | 4.786932661                          |
| 315.9967198                                            | 0.796115891                             | 0.020122647                                           | 4.7808153                            |
| 312.7007862                                            | 0.874747701                             | 0.012408245                                           | 4.528691369                          |
| 253.3157136                                            | 0.840569395                             | 0.015560668                                           | 4.235494086                          |
| 315.2670137                                            | 0.852091125                             | 0.01446465                                            | 4.821745108                          |
| 614.740753                                             | 0.857523377                             | 0.00619865                                            | 4.794341659                          |
| 494.5517745                                            | 0.866104393                             | 0.007085927                                           | 4.67396888                           |
| 250.357405                                             | 0.901540109                             | 0.016863677                                           | 4.568049858                          |
| 283.5662217                                            | 0.902346806                             | 0.011854441                                           | 4.423805721                          |
| 186.3658369                                            | 0.88598634                              | 0.027136642                                           | 4.65660014                           |
| 233.0502773                                            | 0.855896466                             | 0.029301917                                           | 4.88005418                           |
| 284.4372078                                            | 0.871802062                             | 0.016303841                                           | 4.83990684                           |
| 316.4923324                                            | 0.865131775                             | 0.011658993                                           | 4.487676445                          |
| 505.3527626                                            | 0.8703323                               | 0.007345483                                           | 4.864966999                          |
| 554.5800519                                            | 0.901119101                             | 0.008273894                                           | 5.013686737                          |
| 282.3956582                                            | 0.848020005                             | 0.015721665                                           | 4.508756709                          |
| 645.4871149                                            | 0.870715307                             | 0.005739695                                           | 4.792844                             |
| 528.5265925                                            | 0.87123566                              | 0.006111554                                           | 4.655023706                          |
| 502.3692646                                            | 0.879038371                             | 0.007299805                                           | 4.959543905                          |
| 507.0817021                                            | 0.878427878                             | 0.007227407                                           | 4.834685136                          |
| 400.1211879                                            | 0.836844684                             | 0.011099452                                           | 4.598190583                          |
| 332.582216                                             | 0.87281372                              | 0.014663272                                           | 4.594624242                          |
| 426.0134767                                            | 0.870386024                             | 0.008157325                                           | 4.637481294                          |
| 562.9859555                                            | 0.855551141                             | 0.007126162                                           | 4.757956226                          |
| 946.4535616                                            | 0.870608833                             | 0.004062648                                           | 4.74760029                           |
| 563.3759697                                            | 0.894328479                             | 0.005894321                                           | 4.830837912                          |
| 567.7237203                                            | 0.88312294                              | 0.005675003                                           | 4.774806711                          |
| 161.2035082                                            | 0.809824974                             | 0.039541886                                           | 4.156219977                          |
| 543.7538266                                            | 0.880711469                             | 0.007678297                                           | 4.795905953                          |
| 237.3342785                                            | 0.843076037                             | 0.025316583                                           | 4.813320279                          |
| 435.3943609                                            | 0.89339582                              | 0.00848227                                            | 4.865382518                          |
| 230.2070413                                            | 0.854217751                             | 0.019089065                                           | 4.527191808                          |
| 137.6257346                                            | 0.870671907                             | 0.037094701                                           | 3.773654875                          |
| 194.7098186                                            | 0.879158903                             | 0.03415377                                            | 4.468308628                          |
| 438.1617832                                            | 0.869079846                             | 0.007336083                                           | 4.666548247                          |
| 274.4603685                                            | 0.886460146                             | 0.014521785                                           | 4.631864536                          |
| 287.3887962                                            | 0.870875603                             | 0.013499299                                           | 4.426486564                          |
| 523.2160533                                            | 0.843644525                             | 0.007659078                                           | 4.754105416                          |
| 304.6500154                                            | 0.859328517                             | 0.013931613                                           | 4.589935224                          |
| 701.3746345                                            | 0.929777236                             | 0.006500574                                           | 5.051613681                          |
| 291.2448736                                            | 0.834896811                             | 0.014727384                                           | 4.42334173                           |
| 150.289872                                             | 0.879583034                             | 0.038747233                                           | 4.397469481                          |
| 161.4117003                                            | 0.826143451                             | 0.034595086                                           | 4.434820242                          |
| 446.4496276                                            | 0.925209972                             | 0.012342468                                           | 4.922353736                          |

| log.sigma.5.0.mm.3D_girlm_HighGrayLevelRunEmphasis | log.sigma.5.0.mm.3D_girlm_RunLengthNonUniformityNormalized | log.sigma.5.0.mm.3D_glszm_GrayLevelVariance |
|----------------------------------------------------|------------------------------------------------------------|---------------------------------------------|
| 251.4101069                                        | 0.818910173                                                | 30.7229843                                  |
| 365.5028756                                        | 0.77911316                                                 | 24.13420023                                 |
| 229.6727806                                        | 0.802412384                                                | 23.41827399                                 |
| 142.5797555                                        | 0.779368476                                                | 20.43279711                                 |
| 143.4017318                                        | 0.749885237                                                | 17.2428451                                  |
| 133.9389785                                        | 0.732850001                                                | 21.73322857                                 |
| 69.7244065                                         | 0.666506562                                                | 9.013644464                                 |
| 303.0650814                                        | 0.78601549                                                 | 29.15276662                                 |
| 233.5393266                                        | 0.797374314                                                | 23.75535764                                 |
| 577.7390564                                        | 0.810456993                                                | 29.69220591                                 |
| 93.72527139                                        | 0.72287346                                                 | 13.18261165                                 |
| 268.793275                                         | 0.799737362                                                | 23.50603075                                 |
| 143.9353344                                        | 0.724329501                                                | 20.29444071                                 |
| 135.9363847                                        | 0.795911707                                                | 16.3364984                                  |
| 270.3617731                                        | 0.794593414                                                | 33.53052127                                 |
| 374.5348779                                        | 0.773330411                                                | 30.11341858                                 |
| 352.7304666                                        | 0.776678205                                                | 31.36196122                                 |
| 254.0148987                                        | 0.751653058                                                | 23.58590393                                 |
| 249.4270503                                        | 0.799798267                                                | 17.004176                                   |
| 243.0687893                                        | 0.753652105                                                | 23.91842736                                 |
| 373.7012233                                        | 0.768482265                                                | 25.49448057                                 |
| 260.7812237                                        | 0.784828739                                                | 27.39110943                                 |
| 348.7155465                                        | 0.792484237                                                | 29.45407054                                 |
| 173.3476294                                        | 0.792126813                                                | 20.86261132                                 |
| 229.9345623                                        | 0.815314896                                                | 22.37409955                                 |
| 272.3029844                                        | 0.82049394                                                 | 36.22518811                                 |
| 230.9997919                                        | 0.811248149                                                | 25.07270233                                 |
| 289.9699595                                        | 0.823899805                                                | 20.88253518                                 |
| 404.1645532                                        | 0.783671808                                                | 32.90433743                                 |
| 471.7569106                                        | 0.798272664                                                | 33.07902993                                 |
| 335.7554645                                        | 0.774338652                                                | 28.76323578                                 |
| 399.3126017                                        | 0.795413224                                                | 26.33982745                                 |
| 618.2994282                                        | 0.75723409                                                 | 45.02127947                                 |
| 180.9673136                                        | 0.792276302                                                | 20.53263533                                 |
| 117.9574164                                        | 0.763715966                                                | 17.77515432                                 |
| 199.6908028                                        | 0.762258295                                                | 18.63036084                                 |
| 457.8347477                                        | 0.813699598                                                | 40.86818145                                 |
| 259.3213706                                        | 0.760526506                                                | 19.60586735                                 |
| 167.7352819                                        | 0.700016081                                                | 17.85181795                                 |
| 137.7624932                                        | 0.735949748                                                | 18.81226466                                 |
| 157.3741535                                        | 0.783684563                                                | 16.20674556                                 |
| 167.2955857                                        | 0.758425426                                                | 16.08458225                                 |
| 260.9777625                                        | 0.740525816                                                | 19.97665012                                 |
| 166.739759                                         | 0.751943695                                                | 23.03521329                                 |
| 396.8481444                                        | 0.763845607                                                | 38.13154935                                 |
| 164.6853415                                        | 0.77955132                                                 | 17.86675065                                 |
| 455.42029                                          | 0.792953026                                                | 30.53388146                                 |
| 290.284355                                         | 0.735322294                                                | 28.59605832                                 |
| 101.4789823                                        | 0.761603092                                                | 11.24185339                                 |
| 214.3018113                                        | 0.768623336                                                | 25.31673443                                 |
| 362.7118614                                        | 0.738601659                                                | 26.798039                                   |
| 221.0680821                                        | 0.689439689                                                | 23.22820098                                 |
| 217.7319383                                        | 0.752200378                                                | 21.7588144                                  |
| 404.0709485                                        | 0.787773708                                                | 24.61143667                                 |
| 284.1544154                                        | 0.799201286                                                | 24.18854795                                 |
| 298.8262791                                        | 0.801780692                                                | 34.26227314                                 |
| 513.639242                                         | 0.79983708                                                 | 34.6052395                                  |
| 177.8188634                                        | 0.686752932                                                | 25.29185903                                 |
| 211.3200306                                        | 0.782721868                                                | 22.84682943                                 |
| 148.6005632                                        | 0.732759796                                                | 12.479239                                   |
| 206.4880175                                        | 0.756970403                                                | 20.48472301                                 |
| 382.06437                                          | 0.766371596                                                | 31.42952756                                 |
| 319.1489859                                        | 0.774957235                                                | 24.29563031                                 |
| 174.5785807                                        | 0.830596567                                                | 18.84897072                                 |
| 207.4715522                                        | 0.825038365                                                | 18.49642645                                 |
| 136.1245197                                        | 0.804900952                                                | 20.73070507                                 |
| 163.5507145                                        | 0.755711165                                                | 26.10567591                                 |
| 194.2486092                                        | 0.783859257                                                | 25.7450945                                  |
| 201.8230219                                        | 0.770950576                                                | 16.42950625                                 |
| 340.5439733                                        | 0.780338025                                                | 32.00847464                                 |
| 398.0863997                                        | 0.827946398                                                | 35.26723224                                 |
| 177.9972716                                        | 0.752922171                                                | 20.78192176                                 |
| 427.2856052                                        | 0.786545004                                                | 25.60331284                                 |
| 339.6328333                                        | 0.78416857                                                 | 21.51567328                                 |
| 347.5052991                                        | 0.79440554                                                 | 34.99591149                                 |
| 342.9016436                                        | 0.795697187                                                | 33.00638021                                 |
| 231.536536                                         | 0.738805702                                                | 22.38472591                                 |
| 220.8079937                                        | 0.786546644                                                | 19.93583482                                 |
| 274.5833439                                        | 0.7802291                                                  | 24.49066268                                 |
| 343.9879475                                        | 0.759068133                                                | 28.67062269                                 |
| 612.5055852                                        | 0.783435298                                                | 45.03501835                                 |
| 396.1486431                                        | 0.814805275                                                | 35.53405536                                 |
| 393.0467639                                        | 0.800987866                                                | 31.79206575                                 |
| 94.25467109                                        | 0.694823783                                                | 8.770709822                                 |
| 367.0982603                                        | 0.793376518                                                | 25.77296503                                 |
| 151.3521588                                        | 0.742641691                                                | 20.38253827                                 |
| 314.4996635                                        | 0.811774132                                                | 34.49630161                                 |
| 145.6755743                                        | 0.759604322                                                | 14.63786754                                 |
| 79.44226052                                        | 0.786748878                                                | 7.473580247                                 |
| 129.5049123                                        | 0.792865818                                                | 15.289282                                   |
| 294.7321558                                        | 0.782878712                                                | 22.693766                                   |
| 189.8539601                                        | 0.804115361                                                | 23.29668609                                 |
| 187.0838227                                        | 0.775372345                                                | 16.07552517                                 |
| 315.2633215                                        | 0.74227804                                                 | 27.80567555                                 |
| 192.5534867                                        | 0.766392266                                                | 17.43008085                                 |
| 546.8897804                                        | 0.873913169                                                | 56.10510071                                 |
| 174.1851338                                        | 0.731930644                                                | 15.46676406                                 |
| 104.8758268                                        | 0.795355238                                                | 11.81422043                                 |
| 99.27837628                                        | 0.715515152                                                | 12.89102041                                 |
| 346.6228214                                        | 0.862286251                                                | 37.37447197                                 |

| log.sigma.5.0.mm.3D_glszm_SmallAreaHighGrayLevelEmphasis | log.sigma.5.0.mm.3D_glszm_GrayLevelNonUniformityNormalized | log.sigma.5.0.mm.3D_glszm_SizeZoneNonUniformityNormalized |
|----------------------------------------------------------|------------------------------------------------------------|-----------------------------------------------------------|
| 142.3011461                                              | 0.053974242                                                | 0.32123533                                                |
| 169.1515171                                              | 0.060740437                                                | 0.235860371                                               |
| 90.28042429                                              | 0.06010722                                                 | 0.203601189                                               |
| 81.02132035                                              | 0.061019419                                                | 0.288719943                                               |
| 90.41565436                                              | 0.069941637                                                | 0.309634531                                               |
| 67.67752853                                              | 0.062753509                                                | 0.19705239                                                |
| 39.69422219                                              | 0.104143462                                                | 0.212296725                                               |
| 149.4303718                                              | 0.054260923                                                | 0.258496278                                               |
| 118.3634488                                              | 0.057549155                                                | 0.295610586                                               |
| 279.5977442                                              | 0.052612577                                                | 0.254858163                                               |
| 42.23379409                                              | 0.077618977                                                | 0.218798445                                               |
| 124.0159735                                              | 0.05822637                                                 | 0.263646112                                               |
| 75.8230597                                               | 0.061734785                                                | 0.257261816                                               |
| 57.98041182                                              | 0.06889848                                                 | 0.233071871                                               |
| 150.2537915                                              | 0.050194543                                                | 0.320144812                                               |
| 186.5867802                                              | 0.052064736                                                | 0.243999207                                               |
| 146.8568102                                              | 0.052014901                                                | 0.219355872                                               |
| 137.6773943                                              | 0.060743802                                                | 0.278595041                                               |
| 118.205617                                               | 0.07248                                                    | 0.282848                                                  |
| 117.3204818                                              | 0.059175529                                                | 0.246445396                                               |
| 164.8721865                                              | 0.057131778                                                | 0.226713283                                               |
| 139.8290784                                              | 0.057341961                                                | 0.257942829                                               |
| 181.8168787                                              | 0.052582124                                                | 0.238638774                                               |
| 94.94056663                                              | 0.064062051                                                | 0.256104568                                               |
| 100.5490471                                              | 0.058858612                                                | 0.23399274                                                |
| 151.3557587                                              | 0.047069808                                                | 0.300331897                                               |
| 116.2907479                                              | 0.056461817                                                | 0.287955648                                               |
| 126.9653396                                              | 0.062341011                                                | 0.261222549                                               |
| 191.9984449                                              | 0.051258526                                                | 0.29552284                                                |
| 256.1500558                                              | 0.049013064                                                | 0.335862312                                               |
| 156.2810358                                              | 0.05352202                                                 | 0.25540453                                                |
| 211.0927753                                              | 0.055839252                                                | 0.309579717                                               |
| 335.4589262                                              | 0.049050181                                                | 0.298498866                                               |
| 88.83876689                                              | 0.063934061                                                | 0.356426821                                               |
| 48.14532153                                              | 0.068641975                                                | 0.205864198                                               |
| 99.08575201                                              | 0.065986081                                                | 0.250825776                                               |
| 234.6946537                                              | 0.04441359                                                 | 0.28368191                                                |
| 123.5942025                                              | 0.064633724                                                | 0.256574389                                               |
| 76.52065128                                              | 0.069372554                                                | 0.198144174                                               |
| 81.09480318                                              | 0.065577779                                                | 0.280111497                                               |
| 75.25748091                                              | 0.070236686                                                | 0.287810651                                               |
| 86.63420544                                              | 0.070655621                                                | 0.252052071                                               |
| 118.6303208                                              | 0.06522511                                                 | 0.250868485                                               |
| 106.2267805                                              | 0.058443753                                                | 0.31941252                                                |
| 176.6616412                                              | 0.044873746                                                | 0.27462896                                                |
| 73.5767346                                               | 0.066357117                                                | 0.238731219                                               |
| 241.1054121                                              | 0.053212862                                                | 0.277983607                                               |
| 116.5622192                                              | 0.053819723                                                | 0.236055475                                               |
| 57.39840281                                              | 0.088373323                                                | 0.27992597                                                |
| 115.5129012                                              | 0.057296533                                                | 0.255675362                                               |
| 173.7045058                                              | 0.057128984                                                | 0.255603415                                               |
| 91.05210629                                              | 0.059949015                                                | 0.212740879                                               |
| 126.9572399                                              | 0.061231286                                                | 0.2857238                                                 |
| 187.2632582                                              | 0.059508507                                                | 0.278676749                                               |
| 133.1328398                                              | 0.056415873                                                | 0.274879422                                               |
| 161.2701021                                              | 0.047436228                                                | 0.258713644                                               |
| 268.9567844                                              | 0.050283728                                                | 0.325651275                                               |
| 105.9700462                                              | 0.056581512                                                | 0.259874833                                               |
| 95.61462677                                              | 0.059571629                                                | 0.219863564                                               |
| 43.60212008                                              | 0.080808561                                                | 0.183638526                                               |
| 105.6792972                                              | 0.062053543                                                | 0.304561033                                               |
| 196.3448938                                              | 0.051028138                                                | 0.280530486                                               |
| 157.2537072                                              | 0.058706002                                                | 0.26763446                                                |
| 73.93842475                                              | 0.063113109                                                | 0.251263377                                               |
| 91.37441374                                              | 0.065697076                                                | 0.279922599                                               |
| 92.85068531                                              | 0.063772007                                                | 0.298639831                                               |
| 103.7161955                                              | 0.057200274                                                | 0.219390256                                               |
| 112.0390295                                              | 0.054874545                                                | 0.288560983                                               |
| 77.77066472                                              | 0.071314694                                                | 0.23302796                                                |
| 171.2380207                                              | 0.050677351                                                | 0.242645235                                               |
| 187.6435266                                              | 0.047266841                                                | 0.278946878                                               |
| 94.31469485                                              | 0.063207849                                                | 0.2878757                                                 |
| 224.687502                                               | 0.05739662                                                 | 0.284346883                                               |
| 157.2788817                                              | 0.061140543                                                | 0.255798519                                               |
| 208.6571854                                              | 0.048228236                                                | 0.291977137                                               |
| 167.574343                                               | 0.05160714                                                 | 0.267411366                                               |
| 102.9974412                                              | 0.058644839                                                | 0.266689108                                               |
| 97.0385033                                               | 0.064293343                                                | 0.214866501                                               |
| 121.3025908                                              | 0.058213247                                                | 0.236371162                                               |
| 149.7143734                                              | 0.053185288                                                | 0.232268748                                               |
| 304.7535005                                              | 0.044734176                                                | 0.305754338                                               |
| 182.1928542                                              | 0.047069918                                                | 0.247674611                                               |
| 216.9664453                                              | 0.053205219                                                | 0.272559465                                               |
| 39.14979349                                              | 0.0985419                                                  | 0.248517866                                               |
| 167.0621959                                              | 0.05736105                                                 | 0.245271715                                               |
| 71.3356169                                               | 0.061913265                                                | 0.269566327                                               |
| 152.1098186                                              | 0.048172654                                                | 0.263927468                                               |
| 71.74392831                                              | 0.073490002                                                | 0.269260321                                               |
| 28.68408677                                              | 0.11382716                                                 | 0.307654321                                               |
| 53.38583775                                              | 0.073491155                                                | 0.233350676                                               |
| 172.9462016                                              | 0.05877291                                                 | 0.332943934                                               |
| 82.00792578                                              | 0.059520119                                                | 0.268057536                                               |
| 74.21858891                                              | 0.070752418                                                | 0.224682289                                               |
| 143.9087761                                              | 0.054619806                                                | 0.22012575                                                |
| 88.94924613                                              | 0.066751227                                                | 0.261681926                                               |
| 279.2796554                                              | 0.037960398                                                | 0.349697343                                               |
| 82.93226739                                              | 0.076251099                                                | 0.243869352                                               |
| 53.56425443                                              | 0.087682007                                                | 0.271548517                                               |
| 36.41118864                                              | 0.078265306                                                | 0.204795918                                               |
| 159.2569476                                              | 0.046687889                                                | 0.302388927                                               |

| log.sigma.5.0.mm.3D_glszm_SizeZoneNonUniformity | log.sigma.5.0.mm.3D_glszm_GrayLevelNonUniformity | log.sigma.5.0.mm.3D_glszm_LargeAreaEmphasis | log.sigma.5.0.mm.3D_glszm_ZoneVariance |
|-------------------------------------------------|--------------------------------------------------|---------------------------------------------|----------------------------------------|
| 104.0802469                                     | 17.48765432                                      | 77.87962963                                 | 64.09353567                            |
| 83.96629213                                     | 21.62359551                                      | 287.1516854                                 | 255.5900139                            |
| 53.34351145                                     | 15.7480916                                       | 62.38931298                                 | 44.18052561                            |
| 127.9029345                                     | 27.03160271                                      | 400.1963883                                 | 369.5352944                            |
| 55.42458101                                     | 12.51955307                                      | 241.4692737                                 | 213.3615056                            |
| 42.76036866                                     | 13.61751152                                      | 476.0921659                                 | 419.1140181                            |
| 28.44776119                                     | 13.95522388                                      | 679.619403                                  | 617.3979171                            |
| 90.73219373                                     | 19.04558405                                      | 211.7863248                                 | 185.3415313                            |
| 143.371134                                      | 27.91134021                                      | 171.5195876                                 | 154.0523584                            |
| 180.9492958                                     | 37.35492958                                      | 82.35352113                                 | 64.4641956                             |
| 47.47926267                                     | 16.84331797                                      | 681.0460829                                 | 611.7040073                            |
| 104.6675063                                     | 23.11586902                                      | 108.0881612                                 | 90.07380289                            |
| 107.2781775                                     | 25.74340528                                      | 729.1726619                                 | 679.8363554                            |
| 85.07123288                                     | 25.14794521                                      | 152.0986301                                 | 126.1863464                            |
| 126.1370558                                     | 19.77664975                                      | 95.9035533                                  | 80.46703084                            |
| 207.8873239                                     | 44.35915493                                      | 220.3603286                                 | 197.1012186                            |
| 69.3164557                                      | 16.43670886                                      | 162.2879747                                 | 136.4905764                            |
| 122.5818182                                     | 26.72727273                                      | 362.7454545                                 | 328.9470868                            |
| 70.712                                          | 18.12                                            | 101.352                                     | 80.704064                              |
| 119.0331263                                     | 28.58178054                                      | 507.3064182                                 | 471.2318455                            |
| 282.4847512                                     | 71.18619583                                      | 287.9390048                                 | 256.826604                             |
| 113.2369021                                     | 25.17312073                                      | 118.7312073                                 | 95.38844236                            |
| 196.6383495                                     | 43.3276699                                       | 170.5279126                                 | 145.5157752                            |
| 60.44067797                                     | 15.11864407                                      | 103.0932203                                 | 84.0451738                             |
| 149.0533752                                     | 37.49293564                                      | 74.44897959                                 | 57.73795435                            |
| 107.2184874                                     | 16.80392157                                      | 84.76190476                                 | 70.41966591                            |
| 147.7212476                                     | 28.96491228                                      | 84.50097466                                 | 65.92537875                            |
| 216.2922705                                     | 51.61835749                                      | 75.0615942                                  | 58.64343829                            |
| 176.4271357                                     | 30.60134003                                      | 378.9631491                                 | 346.5475788                            |
| 242.1567268                                     | 35.33841886                                      | 248.4008322                                 | 229.2040374                            |
| 199.7263427                                     | 41.85421995                                      | 189.9897698                                 | 161.9350017                            |
| 349.5155004                                     | 63.0425155                                       | 216.5314438                                 | 196.9180781                            |
| 131.0410023                                     | 21.53302961                                      | 504.3166287                                 | 471.07707                              |
| 47.76119403                                     | 8.567164179                                      | 45.08208955                                 | 32.19720428                            |
| 37.05555556                                     | 12.35555556                                      | 129.0222222                                 | 104.6844444                            |
| 118.640592                                      | 31.21141649                                      | 472.9830867                                 | 426.7258335                            |
| 234.0375758                                     | 36.64121212                                      | 116.3793939                                 | 97.66459357                            |
| 129.3134921                                     | 32.57539683                                      | 305.0218254                                 | 259.7534919                            |
| 35.26966292                                     | 12.34831461                                      | 620.6966292                                 | 551.1897488                            |
| 80.11188811                                     | 18.75524476                                      | 334.7132867                                 | 301.9916866                            |
| 74.83076923                                     | 18.26153846                                      | 191.4923077                                 | 165.8731361                            |
| 81.91692308                                     | 22.96307692                                      | 291.9876923                                 | 256.6492402                            |
| 95.07915567                                     | 24.72031662                                      | 779.944591                                  | 716.1554988                            |
| 109.877907                                      | 20.10465116                                      | 425.3372093                                 | 395.3424824                            |
| 201.5776567                                     | 32.9373297                                       | 258.7493188                                 | 236.0896435                            |
| 143                                             | 39.74791319                                      | 217.4207012                                 | 181.8003294                            |
| 227.1126071                                     | 43.4749082                                       | 181.0893513                                 | 160.7345649                            |
| 55.94514768                                     | 12.75527426                                      | 368.8185654                                 | 327.9017608                            |
| 34.43089431                                     | 10.8699187                                       | 118.9430894                                 | 97.91750942                            |
| 50.87939698                                     | 11.40201005                                      | 193.678392                                  | 163.6766243                            |
| 144.4159292                                     | 32.27787611                                      | 1173.79115                                  | 1124.069932                            |
| 40.63350785                                     | 11.45026178                                      | 1607.277487                                 | 1502.40273                             |
| 156.5766423                                     | 33.55474453                                      | 856.2755474                                 | 808.2668329                            |
| 64.09565217                                     | 13.68695652                                      | 121.6565217                                 | 95.73514178                            |
| 218.8040201                                     | 44.90703518                                      | 200.4660804                                 | 176.0033632                            |
| 110.470726                                      | 20.25526932                                      | 103.1381733                                 | 83.58810721                            |
| 240.6562923                                     | 37.15967524                                      | 131.7577808                                 | 112.0701273                            |
| 88.87719298                                     | 19.35087719                                      | 1027.789474                                 | 977.2215724                            |
| 59.58302583                                     | 16.14391144                                      | 190.597786                                  | 164.9665446                            |
| 26.62758621                                     | 11.71724138                                      | 577.6758621                                 | 483.7864447                            |
| 167.2040073                                     | 34.06739526                                      | 262.1621129                                 | 233.4645273                            |
| 257.2464558                                     | 46.79280262                                      | 703.8091603                                 | 668.005185                             |
| 121.2384106                                     | 26.59381898                                      | 185.5916115                                 | 160.4589857                            |
| 116.5862069                                     | 29.28448276                                      | 61.88793103                                 | 45.68036564                            |
| 50.10614525                                     | 11.75977654                                      | 33.24022346                                 | 22.37601823                            |
| 107.2116992                                     | 22.89415042                                      | 173.1169916                                 | 154.6437566                            |
| 44.31683168                                     | 11.55445545                                      | 145.039604                                  | 117.6069013                            |
| 188.4303216                                     | 35.8330781                                       | 349.3843798                                 | 319.5624107                            |
| 47.77073171                                     | 14.6195122                                       | 185.6634146                                 | 145.881166                             |
| 123.2637795                                     | 25.74409449                                      | 141.8562992                                 | 117.5016856                            |
| 293.1731684                                     | 49.67745005                                      | 63.34538535                                 | 50.21769127                            |
| 92.40809969                                     | 20.28971963                                      | 541.8037383                                 | 500.580138                             |
| 274.679089                                      | 55.44513458                                      | 250.7215321                                 | 227.2602448                            |
| 287.7733333                                     | 68.78311111                                      | 389.2702222                                 | 355.7744229                            |
| 275.0424628                                     | 45.43099788                                      | 137.9532909                                 | 117.4829495                            |
| 132.1012146                                     | 25.49392713                                      | 146.0222672                                 | 123.7568596                            |
| 93.07449857                                     | 20.46704871                                      | 560.3810888                                 | 514.8475957                            |
| 56.93962264                                     | 17.03773585                                      | 168.9471698                                 | 142.6476896                            |
| 143.2409241                                     | 35.27722772                                      | 222.7524752                                 | 193.5282815                            |
| 173.9692924                                     | 39.83578104                                      | 657.7022697                                 | 622.3561491                            |
| 92.64356436                                     | 13.55445545                                      | 210.3168317                                 | 190.1113616                            |
| 152.815235                                      | 29.04213938                                      | 103.0940032                                 | 84.54960348                            |
| 139.2778865                                     | 27.18786693                                      | 171.2837573                                 | 147.8437583                            |
| 19.63291139                                     | 7.784810127                                      | 248.6708861                                 | 204.8431341                            |
| 193.2741117                                     | 45.20050761                                      | 115.8172589                                 | 91.79730861                            |
| 150.9571429                                     | 34.67142857                                      | 394.8714286                                 | 356.3871301                            |
| 94.48603352                                     | 17.24581006                                      | 76.79329609                                 | 60.88255672                            |
| 124.3982684                                     | 33.95238095                                      | 692.5822511                                 | 649.1992138                            |
| 27.68888889                                     | 10.24444444                                      | 89.78888889                                 | 68.93444444                            |
| 28.93548387                                     | 9.112903226                                      | 86.27419355                                 | 64.54656608                            |
| 214.7488372                                     | 37.90852713                                      | 357.7131783                                 | 332.9297614                            |
| 68.08661417                                     | 15.11811024                                      | 86.87007874                                 | 67.94415339                            |
| 66.73063973                                     | 21.01346801                                      | 181.4680135                                 | 153.8082055                            |
| 130.53457                                       | 32.38954469                                      | 906.6627319                                 | 852.7777244                            |
| 210.9156328                                     | 53.80148883                                      | 308.0521092                                 | 273.9615785                            |
| 119.5964912                                     | 12.98245614                                      | 21.3625731                                  | 14.68140624                            |
| 63.16216216                                     | 19.74903475                                      | 480.8146718                                 | 434.4801061                            |
| 26.34020619                                     | 8.505154639                                      | 69.73195876                                 | 50.26293974                            |
| 28.67142857                                     | 10.95714286                                      | 263.7857143                                 | 223.5538776                            |
| 128.5152941                                     | 19.84235294                                      | 18.20705882                                 | 10.83423668                            |

| log.sigma.5.0.mm.3D_glszm_ZonePercentage | log.sigma.5.0.mm.3D_glszm_LargeAreaLowGrayLevelEmphasis | log.sigma.5.0.mm.3D_glszm_LargeAreaHighGrayLevelEmphasis | log.sigma.5.0.mm.3D_glszm_HighGrayLevelZoneEmphasis |
|------------------------------------------|---------------------------------------------------------|----------------------------------------------------------|-----------------------------------------------------|
| 0.269326683                              | 0.603369481                                             | 13928.87037                                              | 263.191358                                          |
| 0.178                                    | 1.061526641                                             | 82899.16011                                              | 377.0674157                                         |
| 0.234347048                              | 0.322746673                                             | 16250.14885                                              | 215.8015267                                         |
| 0.18059519                               | 4.980055064                                             | 37777.7991                                               | 157.7404063                                         |
| 0.1886196                                | 3.394003077                                             | 21670.57542                                              | 168.1620112                                         |
| 0.132478632                              | 5.679009356                                             | 46662.3871                                               | 154.5668203                                         |
| 0.126773888                              | 39.13032036                                             | 18622.12687                                              | 85.90298507                                         |
| 0.194459834                              | 1.061921959                                             | 49877.55271                                              | 307.3105413                                         |
| 0.239269857                              | 1.298398669                                             | 27434.6433                                               | 231.4123711                                         |
| 0.236430236                              | 0.163844787                                             | 46505.52817                                              | 560.8323944                                         |
| 0.120088545                              | 12.28823215                                             | 46438.31336                                              | 94.93087558                                         |
| 0.235608309                              | 0.501339451                                             | 26610.20655                                              | 260.9143577                                         |
| 0.142369409                              | 7.599241334                                             | 76174.43645                                              | 159.8968825                                         |
| 0.196447793                              | 1.584377785                                             | 18679.32603                                              | 127.3068493                                         |
| 0.254521964                              | 0.594784863                                             | 18981.56345                                              | 276.7005076                                         |
| 0.20734972                               | 0.802078534                                             | 71710.95892                                              | 375.0176056                                         |
| 0.196884735                              | 0.532131619                                             | 53724.25633                                              | 339.164557                                          |
| 0.172009382                              | 2.403744732                                             | 64590.70455                                              | 266.875                                             |
| 0.220070423                              | 0.485889683                                             | 24741.696                                                | 234.036                                             |
| 0.166494312                              | 3.015008074                                             | 94356.48447                                              | 243.4244306                                         |
| 0.179280576                              | 0.86601065                                              | 104266.2528                                              | 354.8033708                                         |
| 0.206977841                              | 0.605748595                                             | 28274.60364                                              | 269.1617312                                         |
| 0.199951468                              | 0.621650462                                             | 51071.32767                                              | 373.4575243                                         |
| 0.229126214                              | 1.133243857                                             | 13750.5678                                               | 188.7627119                                         |
| 0.244623656                              | 0.543279629                                             | 19129.56044                                              | 214.0031397                                         |
| 0.264053254                              | 0.452413806                                             | 18647.95238                                              | 285.3697479                                         |
| 0.23202171                               | 0.512040558                                             | 17660.24172                                              | 222.1111111                                         |
| 0.246795827                              | 0.28313272                                              | 24813.66425                                              | 258.4444444                                         |
| 0.175639894                              | 1.044724269                                             | 145038.6466                                              | 373.3902848                                         |
| 0.228236784                              | 0.538432789                                             | 119424.5992                                              | 440.0998613                                         |
| 0.188797682                              | 0.654171528                                             | 64081.11637                                              | 315.983376                                          |
| 0.2258                                   | 0.731766965                                             | 73114.76882                                              | 384.2834367                                         |
| 0.17344923                               | 0.993797567                                             | 266181.4169                                              | 622.881549                                          |
| 0.278586279                              | 0.501084729                                             | 6407.052239                                              | 170.6865672                                         |
| 0.202702703                              | 1.725343989                                             | 13211.91667                                              | 115.0166667                                         |
| 0.147031396                              | 2.983083836                                             | 81391.74419                                              | 201.2515856                                         |
| 0.231157187                              | 0.298865817                                             | 52055.88727                                              | 442.7127273                                         |
| 0.148628723                              | 1.380600058                                             | 73728.64881                                              | 245.6758714                                         |
| 0.119946092                              | 4.819167888                                             | 86021.24157                                              | 180.3426966                                         |
| 0.174816626                              | 4.679671294                                             | 28279.68182                                              | 160.972028                                          |
| 0.197568389                              | 1.743575438                                             | 23936.26538                                              | 150.0538462                                         |
| 0.168219462                              | 2.802256996                                             | 34558.48615                                              | 179.4523077                                         |
| 0.125206475                              | 4.340715859                                             | 155485.4644                                              | 252.237467                                          |
| 0.182590234                              | 4.678020279                                             | 43666.57849                                              | 188.9505814                                         |
| 0.210074413                              | 0.744333408                                             | 98262.85831                                              | 354.380109                                          |
| 0.167552448                              | 1.974937435                                             | 38700.9399                                               | 155.096828                                          |
| 0.221649485                              | 0.470861902                                             | 75598.47491                                              | 456.9033048                                         |
| 0.156332454                              | 1.242372199                                             | 116483.7553                                              | 244.2025316                                         |
| 0.218085106                              | 3.007907724                                             | 7119.130081                                              | 114.5203252                                         |
| 0.182568807                              | 1.558603952                                             | 29018.1608                                               | 238.2713568                                         |
| 0.141817269                              | 4.12566151                                              | 346708.4938                                              | 364.0566372                                         |
| 0.097648262                              | 8.712484978                                             | 307814.2618                                              | 214.1308901                                         |
| 0.144324467                              | 7.026402735                                             | 118691.4325                                              | 241.479927                                          |
| 0.196413322                              | 0.380225762                                             | 43463.5                                                  | 374.9521739                                         |
| 0.202184404                              | 0.84031545                                              | 56730.90452                                              | 265.491206                                          |
| 0.226165254                              | 0.514197582                                             | 26764.57143                                              | 313.4730679                                         |
| 0.22537359                               | 0.314170348                                             | 62501.26522                                              | 488.6008119                                         |
| 0.140625                                 | 9.711288957                                             | 114494.4386                                              | 214.7163743                                         |
| 0.197521866                              | 1.144380658                                             | 34977.369                                                | 214.5313653                                         |
| 0.103202847                              | 4.514356999                                             | 80797.4069                                               | 124.2551724                                         |
| 0.1866712                                | 2.670011945                                             | 36996.36794                                              | 204.7814208                                         |
| 0.167122289                              | 2.194813759                                             | 238227.7481                                              | 367.6739368                                         |
| 0.199471598                              | 0.732428488                                             | 51941.5011                                               | 312.8454746                                         |
| 0.248394004                              | 0.485384209                                             | 12637.72845                                              | 150.8017241                                         |
| 0.303389831                              | 0.230530404                                             | 6436.843575                                              | 188.2234637                                         |
| 0.232663642                              | 3.383247005                                             | 11892.71031                                              | 166.810585                                          |
| 0.190926276                              | 2.365684469                                             | 13777.08911                                              | 214.1485149                                         |
| 0.18311834                               | 3.50407472                                              | 43089.82389                                              | 213.5987749                                         |
| 0.158546017                              | 1.162910683                                             | 36448.37561                                              | 182.902439                                          |
| 0.202632629                              | 0.564770794                                             | 40588.98425                                              | 353.3917323                                         |
| 0.275997899                              | 0.266995984                                             | 26643.62988                                              | 365.2892483                                         |
| 0.155749636                              | 4.50758103                                              | 69912.28349                                              | 189.7009346                                         |
| 0.206454371                              | 0.781840416                                             | 89004.34679                                              | 429.2971014                                         |
| 0.172784519                              | 1.21715989                                              | 133523.6942                                              | 312.7564444                                         |
| 0.221022994                              | 0.571444053                                             | 39274.46391                                              | 374.462845                                          |
| 0.211926212                              | 0.561961577                                             | 44400.17409                                              | 329.8360324                                         |
| 0.148195329                              | 2.727259094                                             | 123435.0745                                              | 203.2063037                                         |
| 0.194996321                              | 1.160659691                                             | 29097.60377                                              | 221.6830189                                         |
| 0.184981685                              | 0.881723515                                             | 61292.33333                                              | 256.8267327                                         |
| 0.168201213                              | 1.992460537                                             | 227008.7664                                              | 315.6315087                                         |
| 0.22246696                               | 0.368031865                                             | 124704.637                                               | 580.7359736                                         |
| 0.232216786                              | 0.287445903                                             | 41876.18801                                              | 374.2252836                                         |
| 0.2065481                                | 0.573612719                                             | 55756.49706                                              | 412.1565558                                         |
| 0.151051625                              | 5.038030282                                             | 15870.03797                                              | 89.08860759                                         |
| 0.204039358                              | 0.383472786                                             | 43921.10787                                              | 340.3401015                                         |
| 0.161197467                              | 5.770735813                                             | 39665.09821                                              | 155.6892857                                         |
| 0.25070028                               | 0.323286182                                             | 21529.65642                                              | 310.1675978                                         |
| 0.151823858                              | 7.689471717                                             | 73504.53463                                              | 148.6861472                                         |
| 0.218978102                              | 1.414463595                                             | 8419.466667                                              | 61.57777778                                         |
| 0.214532872                              | 1.169348535                                             | 11352.51613                                              | 114.6451613                                         |
| 0.200872002                              | 1.905852781                                             | 72938.9845                                               | 308.8542636                                         |
| 0.229864253                              | 0.68956883                                              | 13803.41339                                              | 180.1377953                                         |
| 0.190140845                              | 1.051911628                                             | 34854.57576                                              | 165.6228956                                         |
| 0.136227889                              | 3.233169862                                             | 263694.9258                                              | 312.5784148                                         |
| 0.171270718                              | 2.123246399                                             | 52457.52854                                              | 184.7568238                                         |
| 0.386877828                              | 0.061557506                                             | 13200.05263                                              | 494.7748538                                         |
| 0.146908678                              | 3.832857781                                             | 65436.54826                                              | 178.8918919                                         |
| 0.226635514                              | 1.893647635                                             | 5162.628866                                              | 108.9484536                                         |
| 0.157657658                              | 5.098629103                                             | 17138.05                                                 | 102.3285714                                         |
| 0.368284229                              | 0.114460946                                             | 6938.614118                                              | 310.1294118                                         |

| log.sigma.5.0.mm.3D_glszm_SmallAreaEmphasis | log.sigma.5.0.mm.3D_glszm_LowGrayLevelZoneEmphasis | log.sigma.5.0.mm.3D_glszm_ZoneEntropy | log.sigma.5.0.mm.3D_glszm_SmallAreaLowGrayLevelEmphasis |
|---------------------------------------------|----------------------------------------------------|---------------------------------------|---------------------------------------------------------|
| 0.580886299                                 | 0.01299379                                         | 6.253621947                           | 0.009266618                                             |
| 0.493988931                                 | 0.008201041                                        | 6.494324926                           | 0.005976412                                             |
| 0.447056356                                 | 0.013315676                                        | 6.489397452                           | 0.008652736                                             |
| 0.554963405                                 | 0.022000644                                        | 6.412806756                           | 0.0145671                                               |
| 0.575748667                                 | 0.019166875                                        | 5.695892449                           | 0.007777795                                             |
| 0.449897054                                 | 0.020020989                                        | 6.490386171                           | 0.011555742                                             |
| 0.465512198                                 | 0.033392667                                        | 5.591171867                           | 0.016065015                                             |
| 0.51871756                                  | 0.009983244                                        | 6.50053037                            | 0.004622267                                             |
| 0.559097876                                 | 0.010373859                                        | 6.364025086                           | 0.007550923                                             |
| 0.517264542                                 | 0.004147864                                        | 6.870758323                           | 0.002750831                                             |
| 0.47193007                                  | 0.032281539                                        | 6.132715806                           | 0.012555674                                             |
| 0.52323836                                  | 0.009317197                                        | 6.438025226                           | 0.00625772                                              |
| 0.518117227                                 | 0.017738055                                        | 6.431121927                           | 0.011468509                                             |
| 0.494862854                                 | 0.020769585                                        | 6.417689311                           | 0.010052398                                             |
| 0.585181648                                 | 0.010518243                                        | 6.405393804                           | 0.008178238                                             |
| 0.501389045                                 | 0.005947281                                        | 6.896020733                           | 0.002295453                                             |
| 0.475864291                                 | 0.009603069                                        | 6.750389868                           | 0.006479363                                             |
| 0.543074116                                 | 0.008708572                                        | 6.426610866                           | 0.006138497                                             |
| 0.549688223                                 | 0.010454606                                        | 6.089500784                           | 0.007934651                                             |
| 0.508317828                                 | 0.013197725                                        | 6.62204383                            | 0.006530548                                             |
| 0.481742672                                 | 0.005398523                                        | 7.05854169                            | 0.00331301                                              |
| 0.522850327                                 | 0.010164689                                        | 6.612292469                           | 0.006412862                                             |
| 0.498954047                                 | 0.005827028                                        | 6.998465564                           | 0.003481925                                             |
| 0.5192462                                   | 0.020704238                                        | 6.161063731                           | 0.009887641                                             |
| 0.486331741                                 | 0.01098705                                         | 6.653118233                           | 0.004454525                                             |
| 0.565055444                                 | 0.014024588                                        | 6.471682819                           | 0.010693557                                             |
| 0.555752269                                 | 0.010886403                                        | 6.552329332                           | 0.007496808                                             |
| 0.525097651                                 | 0.007698982                                        | 6.668300601                           | 0.004693828                                             |
| 0.560517861                                 | 0.007080732                                        | 6.63705765                            | 0.005137054                                             |
| 0.600186091                                 | 0.004931009                                        | 6.544573957                           | 0.003604431                                             |
| 0.519900855                                 | 0.007974996                                        | 6.903292093                           | 0.005084177                                             |
| 0.575632515                                 | 0.005210275                                        | 6.68691051                            | 0.002417569                                             |
| 0.565927931                                 | 0.005985802                                        | 6.687851816                           | 0.004304179                                             |
| 0.619453157                                 | 0.020540865                                        | 5.489847609                           | 0.012135359                                             |
| 0.452923003                                 | 0.034450156                                        | 6.167082316                           | 0.016174504                                             |
| 0.51431803                                  | 0.011341959                                        | 6.478034322                           | 0.005322485                                             |
| 0.54955993                                  | 0.005696289                                        | 6.996681044                           | 0.002765505                                             |
| 0.524414166                                 | 0.008966872                                        | 6.56937618                            | 0.004451419                                             |
| 0.451288293                                 | 0.017636943                                        | 6.192622145                           | 0.01248257                                              |
| 0.547218106                                 | 0.018617373                                        | 6.237920052                           | 0.012559094                                             |
| 0.554058907                                 | 0.016293667                                        | 6.007696148                           | 0.01111906                                              |
| 0.516969338                                 | 0.012119075                                        | 6.300556147                           | 0.007974505                                             |
| 0.515638451                                 | 0.013132457                                        | 6.432148226                           | 0.010276295                                             |
| 0.58568274                                  | 0.016330025                                        | 6.203562315                           | 0.010993457                                             |
| 0.53793076                                  | 0.007860336                                        | 6.89455563                            | 0.005224025                                             |
| 0.50196631                                  | 0.016783741                                        | 6.635741625                           | 0.007402134                                             |
| 0.542413911                                 | 0.004952812                                        | 6.757535958                           | 0.002252128                                             |
| 0.494032953                                 | 0.013943537                                        | 6.411361368                           | 0.009263803                                             |
| 0.538196555                                 | 0.026276928                                        | 5.412481351                           | 0.018276842                                             |
| 0.516311034                                 | 0.013252818                                        | 6.208513676                           | 0.010056061                                             |
| 0.513712297                                 | 0.006556691                                        | 6.640027337                           | 0.003012562                                             |
| 0.465074925                                 | 0.016593804                                        | 6.261432297                           | 0.005893507                                             |
| 0.552514524                                 | 0.009456167                                        | 6.451090303                           | 0.005851176                                             |
| 0.545884593                                 | 0.008443292                                        | 6.252413389                           | 0.006927776                                             |
| 0.540091266                                 | 0.00795391                                         | 6.646721006                           | 0.004965789                                             |
| 0.521033142                                 | 0.009634375                                        | 6.756050309                           | 0.005909379                                             |
| 0.591974166                                 | 0.005095857                                        | 6.670028841                           | 0.002600926                                             |
| 0.524826533                                 | 0.012865693                                        | 6.466902668                           | 0.008176233                                             |
| 0.47140463                                  | 0.013464802                                        | 6.483825103                           | 0.005994167                                             |
| 0.434845056                                 | 0.021715402                                        | 6.053412063                           | 0.014206767                                             |
| 0.571625978                                 | 0.011274723                                        | 6.351185794                           | 0.007804775                                             |
| 0.545199945                                 | 0.006365007                                        | 6.864649219                           | 0.003336873                                             |
| 0.531370389                                 | 0.00781016                                         | 6.553666396                           | 0.00547339                                              |
| 0.508430528                                 | 0.018830352                                        | 6.422750316                           | 0.00980543                                              |
| 0.542953432                                 | 0.015837362                                        | 5.921107067                           | 0.01255707                                              |
| 0.564090668                                 | 0.019514658                                        | 6.222090807                           | 0.011491                                                |
| 0.466440727                                 | 0.016780373                                        | 6.328346929                           | 0.005371134                                             |
| 0.554395692                                 | 0.014598425                                        | 6.58325566                            | 0.008344883                                             |
| 0.49292885                                  | 0.01404447                                         | 6.113957521                           | 0.009683168                                             |
| 0.505797799                                 | 0.007827699                                        | 6.867110886                           | 0.005298892                                             |
| 0.539393204                                 | 0.007146244                                        | 6.8945891                             | 0.004018858                                             |
| 0.553927398                                 | 0.017436091                                        | 6.227252615                           | 0.01142813                                              |
| 0.550647665                                 | 0.004650846                                        | 6.715471729                           | 0.002863294                                             |
| 0.51913402                                  | 0.006018985                                        | 6.81792355                            | 0.003675319                                             |
| 0.557855181                                 | 0.006622129                                        | 6.889480504                           | 0.003665837                                             |
| 0.531186414                                 | 0.008039205                                        | 6.728277134                           | 0.005158075                                             |
| 0.527628244                                 | 0.013145812                                        | 6.371402699                           | 0.008063623                                             |
| 0.465644885                                 | 0.013273645                                        | 6.363268135                           | 0.004304952                                             |
| 0.495060362                                 | 0.008930164                                        | 6.763354529                           | 0.005619504                                             |
| 0.487360959                                 | 0.008078501                                        | 6.912960203                           | 0.004885694                                             |
| 0.570222128                                 | 0.006207321                                        | 6.493294314                           | 0.005071489                                             |
| 0.502007966                                 | 0.006516753                                        | 6.899826308                           | 0.003104896                                             |
| 0.536240243                                 | 0.006437025                                        | 6.657859647                           | 0.004240951                                             |
| 0.510600745                                 | 0.031847941                                        | 5.24955021                            | 0.015127816                                             |
| 0.507481294                                 | 0.007778871                                        | 6.865725323                           | 0.00396203                                              |
| 0.532177148                                 | 0.019000873                                        | 6.464757905                           | 0.011446046                                             |
| 0.527646772                                 | 0.010206298                                        | 6.642581369                           | 0.006690603                                             |
| 0.534062788                                 | 0.016914306                                        | 6.255051812                           | 0.011192779                                             |
| 0.555161208                                 | 0.055934038                                        | 4.921027998                           | 0.048114361                                             |
| 0.48538272                                  | 0.030176927                                        | 5.708539178                           | 0.011204564                                             |
| 0.599174071                                 | 0.006382761                                        | 6.383290675                           | 0.004749701                                             |
| 0.533703202                                 | 0.018091682                                        | 6.245738817                           | 0.013512346                                             |
| 0.481363105                                 | 0.014464163                                        | 6.327706585                           | 0.005998414                                             |
| 0.475411572                                 | 0.007567826                                        | 6.951291205                           | 0.004337871                                             |
| 0.527888928                                 | 0.010898658                                        | 6.592420848                           | 0.005704955                                             |
| 0.611711795                                 | 0.007903661                                        | 6.570263191                           | 0.006263964                                             |
| 0.506117806                                 | 0.01412614                                         | 6.141528208                           | 0.010170259                                             |
| 0.536302203                                 | 0.029568621                                        | 5.328444647                           | 0.020512739                                             |
| 0.451183803                                 | 0.027655987                                        | 5.9093961                             | 0.019086037                                             |
| 0.563230728                                 | 0.010110096                                        | 6.526557408                           | 0.004911153                                             |

| log.sigma.5.0.mm.3D_ngtdm_Coarseness | log.sigma.5.0.mm.3D_ngtdm_Complexity | log.sigma.5.0.mm.3D_ngtdm_Strength | log.sigma.5.0.mm.3D_ngtdm_Busyness | log.sigma.5.0.mm.3D_ngtdm_Contrast |
|--------------------------------------|--------------------------------------|------------------------------------|------------------------------------|------------------------------------|
| 0.012324817                          | 0.321433805                          | 2.829199767                        | 0.239962083                        | 8.84E-05                           |
| 0.006911703                          | 0.223580165                          | 2.785695208                        | 0.227123047                        | 2.26E-05                           |
| 0.013292989                          | 0.330153917                          | 3.914978613                        | 0.156861598                        | 4.93E-05                           |
| 0.005945523                          | 0.098837737                          | 1.244199588                        | 0.696240108                        | 2.59E-05                           |
| 0.014726944                          | 0.18929055                           | 2.250021753                        | 0.351062936                        | 9.23E-05                           |
| 0.008872375                          | 0.121691389                          | 1.807972237                        | 0.467894291                        | 3.43E-05                           |
| 0.014551583                          | 0.074588385                          | 1.387027356                        | 0.791247985                        | 8.37E-05                           |
| 0.008797591                          | 0.247253443                          | 3.105245225                        | 0.212036388                        | 3.20E-05                           |
| 0.006619213                          | 0.20519042                           | 1.837280584                        | 0.390212959                        | 3.46E-05                           |
| 0.005026379                          | 0.212270885                          | 2.575349687                        | 0.216423862                        | 1.69E-05                           |
| 0.007372357                          | 0.064788768                          | 0.810908438                        | 0.99568096                         | 3.58E-05                           |
| 0.007976774                          | 0.213731343                          | 2.120892313                        | 0.261022602                        | 3.16E-05                           |
| 0.00490148                           | 0.061260007                          | 0.844350889                        | 0.809033207                        | 1.66E-05                           |
| 0.007552037                          | 0.098448527                          | 1.060258774                        | 0.61462333                         | 3.79E-05                           |
| 0.00847375                           | 0.33934225                           | 2.61580735                         | 0.272019573                        | 5.69E-05                           |
| 0.004373335                          | 0.10944793                           | 1.669194244                        | 0.354235341                        | 1.24E-05                           |
| 0.010542852                          | 0.258617805                          | 3.864928718                        | 0.140062711                        | 2.64E-05                           |
| 0.00532502                           | 0.18992944                           | 2.04826076                         | 0.363638553                        | 1.85E-05                           |
| 0.010091289                          | 0.226385954                          | 1.800918083                        | 0.280639447                        | 6.28E-05                           |
| 0.005293787                          | 0.112492952                          | 1.580535213                        | 0.402391506                        | 1.67E-05                           |
| 0.002361015                          | 0.07830458                           | 1.191559913                        | 0.491536888                        | 4.39E-06                           |
| 0.00716386                           | 0.222993919                          | 2.998069653                        | 0.244180893                        | 1.98E-05                           |
| 0.003820143                          | 0.140108571                          | 1.902203646                        | 0.349403105                        | 9.31E-06                           |
| 0.015385414                          | 0.193084512                          | 2.41631176                         | 0.288876386                        | 9.60E-05                           |
| 0.006248943                          | 0.102905193                          | 1.306041941                        | 0.445696803                        | 3.24E-05                           |
| 0.009474754                          | 0.364406553                          | 3.110627705                        | 0.216479413                        | 5.49E-05                           |
| 0.007528684                          | 0.139609979                          | 1.932755989                        | 0.381874569                        | 2.78E-05                           |
| 0.003942936                          | 0.12359597                           | 1.157626639                        | 0.483371675                        | 1.83E-05                           |
| 0.004079469                          | 0.128853965                          | 1.629635679                        | 0.335935526                        | 1.32E-05                           |
| 0.004933179                          | 0.207445544                          | 2.624616411                        | 0.206391536                        | 1.14E-05                           |
| 0.004213737                          | 0.090792447                          | 1.447102563                        | 0.404741492                        | 1.20E-05                           |
| 0.002724247                          | 0.123820111                          | 1.322767183                        | 0.462685993                        | 8.88E-06                           |
| 0.006609692                          | 0.258230331                          | 4.774690122                        | 0.130281737                        | 1.41E-05                           |
| 0.028915675                          | 0.483372698                          | 4.236257372                        | 0.150951707                        | 0.000214512                        |
| 0.01573343                           | 0.177647219                          | 2.001747765                        | 0.357050061                        | 9.13E-05                           |
| 0.004314349                          | 0.075153064                          | 0.913203078                        | 0.662788241                        | 1.46E-05                           |
| 0.004198405                          | 0.235192355                          | 2.601502946                        | 0.245195163                        | 1.38E-05                           |
| 0.004185986                          | 0.085724519                          | 1.139934039                        | 0.503567498                        | 1.19E-05                           |
| 0.01020528                           | 0.118825584                          | 2.13625361                         | 0.301403051                        | 2.22E-05                           |
| 0.008439017                          | 0.119027574                          | 1.506761254                        | 0.568125403                        | 4.29E-05                           |
| 0.009322136                          | 0.137784108                          | 1.236972031                        | 0.505074587                        | 5.77E-05                           |
| 0.006941032                          | 0.097586018                          | 1.068278934                        | 0.610437326                        | 3.12E-05                           |
| 0.00482996                           | 0.096414919                          | 1.304271307                        | 0.469609215                        | 1.38E-05                           |
| 0.007402395                          | 0.136011001                          | 1.466799416                        | 0.50734208                         | 3.69E-05                           |
| 0.004791049                          | 0.162057464                          | 1.772452374                        | 0.282883302                        | 1.86E-05                           |
| 0.004349562                          | 0.065859755                          | 0.844394606                        | 0.841393434                        | 1.94E-05                           |
| 0.004086281                          | 0.178247473                          | 2.259259885                        | 0.263592063                        | 1.06E-05                           |
| 0.010553357                          | 0.180629486                          | 3.259935153                        | 0.162212639                        | 2.61E-05                           |
| 0.02230252                           | 0.208528443                          | 2.154424071                        | 0.404721568                        | 0.000191162                        |
| 0.014286217                          | 0.274511245                          | 3.285033841                        | 0.212425571                        | 5.83E-05                           |
| 0.004068171                          | 0.10179306                           | 1.679425839                        | 0.35647978                         | 8.79E-06                           |
| 0.007108913                          | 0.104722527                          | 1.795375497                        | 0.325058322                        | 1.60E-05                           |
| 0.004010938                          | 0.093011298                          | 1.150626127                        | 0.6372566                          | 1.38E-05                           |
| 0.011870817                          | 0.301660283                          | 3.282963126                        | 0.164130314                        | 5.63E-05                           |
| 0.003675075                          | 0.093610869                          | 0.956837411                        | 0.63447057                         | 1.77E-05                           |
| 0.009425614                          | 0.230220517                          | 3.006303688                        | 0.205769679                        | 3.50E-05                           |
| 0.004308722                          | 0.205568626                          | 2.309956032                        | 0.243906493                        | 1.38E-05                           |
| 0.005879964                          | 0.137172055                          | 1.934428384                        | 0.427583071                        | 1.81E-05                           |
| 0.010220623                          | 0.19573935                           | 2.305147327                        | 0.259437975                        | 3.79E-05                           |
| 0.009556793                          | 0.090237503                          | 1.340299837                        | 0.41557604                         | 2.67E-05                           |
| 0.004918717                          | 0.101801334                          | 1.028440371                        | 0.741144858                        | 2.80E-05                           |
| 0.002762008                          | 0.098623952                          | 1.33892876                         | 0.445304402                        | 6.64E-06                           |
| 0.006000024                          | 0.193498337                          | 2.190260731                        | 0.266716535                        | 1.89E-05                           |
| 0.006917294                          | 0.129789649                          | 1.061395636                        | 0.589124884                        | 5.64E-05                           |
| 0.020124504                          | 0.460206786                          | 3.094199849                        | 0.167664582                        | 0.000162955                        |
| 0.008412184                          | 0.214532975                          | 1.934994035                        | 0.531695836                        | 5.74E-05                           |
| 0.016982848                          | 0.248335672                          | 4.025060405                        | 0.255332834                        | 7.31E-05                           |
| 0.004174884                          | 0.083006306                          | 0.853950089                        | 0.975856574                        | 2.69E-05                           |
| 0.01102426                           | 0.143336156                          | 1.732702319                        | 0.34703518                         | 5.15E-05                           |
| 0.006256732                          | 0.189003495                          | 2.514665766                        | 0.251672263                        | 1.99E-05                           |
| 0.004093068                          | 0.161234939                          | 1.585683284                        | 0.360564074                        | 2.40E-05                           |
| 0.006285257                          | 0.11159625                           | 1.197925537                        | 0.538415658                        | 2.85E-05                           |
| 0.003067268                          | 0.138992804                          | 1.764369817                        | 0.358583003                        | 8.07E-06                           |
| 0.002180328                          | 0.06562344                           | 0.824103323                        | 0.68761281                         | 6.29E-06                           |
| 0.003793688                          | 0.176361696                          | 2.236868361                        | 0.329679334                        | 1.02E-05                           |
| 0.006611982                          | 0.267414287                          | 3.105818143                        | 0.203041058                        | 1.91E-05                           |
| 0.006154997                          | 0.117211023                          | 1.606838105                        | 0.354866149                        | 1.65E-05                           |
| 0.008372736                          | 0.24749023                           | 1.968219108                        | 0.327713426                        | 5.35E-05                           |
| 0.004085612                          | 0.124824889                          | 1.32549165                         | 0.429666385                        | 1.39E-05                           |
| 0.003776592                          | 0.087431363                          | 1.472067888                        | 0.376495421                        | 8.45E-06                           |
| 0.010116208                          | 0.542752468                          | 6.275473289                        | 0.081717478                        | 3.07E-05                           |
| 0.006233425                          | 0.208840406                          | 2.652944825                        | 0.207577095                        | 1.86E-05                           |
| 0.005954548                          | 0.248706907                          | 3.008222461                        | 0.208776723                        | 1.70E-05                           |
| 0.022556692                          | 0.136223888                          | 1.462874335                        | 0.470476527                        | 0.000167285                        |
| 0.003779684                          | 0.129913556                          | 1.599883664                        | 0.374777327                        | 1.26E-05                           |
| 0.004545823                          | 0.076857833                          | 1.007629113                        | 0.913297404                        | 1.93E-05                           |
| 0.010312658                          | 0.353397147                          | 3.462614699                        | 0.17449293                         | 4.95E-05                           |
| 0.004472543                          | 0.059264313                          | 0.677315733                        | 1.05055572                         | 2.11E-05                           |
| 0.019861964                          | 0.19687686                           | 1.247082199                        | 0.447160893                        | 0.000248387                        |
| 0.02333469                           | 0.259630457                          | 2.704940596                        | 0.27074576                         | 0.000178093                        |
| 0.004437521                          | 0.110355839                          | 1.167158831                        | 0.508444634                        | 1.78E-05                           |
| 0.011694034                          | 0.258020395                          | 2.256963098                        | 0.297988107                        | 7.77E-05                           |
| 0.008874468                          | 0.121604851                          | 1.595897029                        | 0.34961714                         | 3.22E-05                           |
| 0.003610494                          | 0.082912774                          | 1.380730391                        | 0.439615667                        | 8.09E-06                           |
| 0.002889683                          | 0.052881639                          | 0.59573048                         | 1.018458664                        | 1.12E-05                           |
| 0.015185951                          | 1.126561425                          | 7.350303416                        | 0.073860717                        | 0.000147529                        |
| 0.007816371                          | 0.106177592                          | 1.446141796                        | 0.429574205                        | 2.53E-05                           |
| 0.031527115                          | 0.302136839                          | 3.185619998                        | 0.264024576                        | 0.000256194                        |
| 0.016256211                          | 0.119925898                          | 1.846747267                        | 0.449450185                        | 6.92E-05                           |
| 0.011978756                          | 0.601330369                          | 4.943430902                        | 0.13184561                         | 8.41E-05                           |

| log.sigma.4.5.mm.3D_gldm_GrayLevelVariance | log.sigma.4.5.mm.3D_gldm_HighGrayLevelEmphasis | log.sigma.4.5.mm.3D_gldm_GrayLevelNonUniformityNormalized | log.sigma.4.5.mm.3D_gldm_DependenceEntropy |
|--------------------------------------------|------------------------------------------------|-----------------------------------------------------------|--------------------------------------------|
| 26.38617919                                | 233.286783                                     | 0.056029917                                               | 6.993985409                                |
| 17.40672775                                | 310.1075                                       | 0.0741125                                                 | 6.858730978                                |
| 18.83263622                                | 233.2271914                                    | 0.070337076                                               | 6.728358178                                |
| 16.20348504                                | 145.2523441                                    | 0.073812793                                               | 6.916469103                                |
| 16.40053253                                | 132.8767123                                    | 0.088810694                                               | 6.787027007                                |
| 13.91328506                                | 122.5665446                                    | 0.092294424                                               | 6.779106472                                |
| 12.69903486                                | 73.54493851                                    | 0.111363716                                               | 6.749926093                                |
| 22.08584771                                | 311.2554017                                    | 0.064370593                                               | 7.110858553                                |
| 19.94076027                                | 217.0335471                                    | 0.066443662                                               | 7.001758531                                |
| 22.52831041                                | 602.5954046                                    | 0.06135423                                                | 7.02673233                                 |
| 10.2395609                                 | 120.9490869                                    | 0.09669921                                                | 6.793595018                                |
| 16.43300549                                | 257.6498516                                    | 0.072384189                                               | 6.839687506                                |
| 11.61969502                                | 178.7695459                                    | 0.094353786                                               | 7.048664496                                |
| 13.96583476                                | 129.1410118                                    | 0.076279111                                               | 6.724111754                                |
| 25.05247206                                | 252.6763566                                    | 0.062143201                                               | 7.1608901                                  |
| 22.99374226                                | 353.5449014                                    | 0.065205328                                               | 7.363402335                                |
| 18.77855378                                | 380.3943925                                    | 0.073637096                                               | 6.940394627                                |
| 17.53990959                                | 260.1223612                                    | 0.071608732                                               | 7.13193082                                 |
| 13.6942044                                 | 271.443662                                     | 0.07715483                                                | 6.623300497                                |
| 17.39374493                                | 225.634264                                     | 0.075271861                                               | 7.037923579                                |
| 17.94328857                                | 365.1461871                                    | 0.070834512                                               | 7.161132026                                |
| 18.73716707                                | 313.601603                                     | 0.06912821                                                | 7.04705729                                 |
| 19.86199614                                | 300.1502063                                    | 0.068142699                                               | 7.0549003                                  |
| 20.81357809                                | 187.6747573                                    | 0.0663908                                                 | 6.817893854                                |
| 21.92514706                                | 201.9423963                                    | 0.062065981                                               | 6.935305643                                |
| 23.41235207                                | 327.6464497                                    | 0.064088705                                               | 6.902716718                                |
| 19.24882352                                | 217.47128                                      | 0.06594203                                                | 6.851935834                                |
| 18.72288166                                | 254.7275708                                    | 0.066858327                                               | 6.80710374                                 |
| 17.22792116                                | 349.5954693                                    | 0.078036122                                               | 6.930405187                                |
| 18.67499713                                | 416.980057                                     | 0.071491423                                               | 6.99920584                                 |
| 20.52114843                                | 395.5446644                                    | 0.06676306                                                | 7.158498068                                |
| 19.40346684                                | 339.291                                        | 0.06795448                                                | 7.155165014                                |
| 22.1227132                                 | 583.7621493                                    | 0.071948768                                               | 7.113740739                                |
| 18.77197972                                | 169.3825364                                    | 0.070413769                                               | 6.658375315                                |
| 15.76442532                                | 159.4132883                                    | 0.075255154                                               | 6.793487547                                |
| 13.10301883                                | 242.8464408                                    | 0.082686408                                               | 6.854705947                                |
| 27.07562656                                | 476.1616699                                    | 0.058855634                                               | 7.072139134                                |
| 13.37019176                                | 276.9943969                                    | 0.083481601                                               | 6.921585261                                |
| 10.80265101                                | 181.9292453                                    | 0.099795846                                               | 6.901629601                                |
| 15.7894273                                 | 123.1448655                                    | 0.082434646                                               | 7.04221245                                 |
| 12.50959144                                | 146.6010638                                    | 0.082048392                                               | 6.702407854                                |
| 15.57973158                                | 155.0434783                                    | 0.082759474                                               | 6.887407028                                |
| 13.36560145                                | 271.7922035                                    | 0.082377095                                               | 6.982947071                                |
| 16.32226093                                | 153.2892781                                    | 0.082826777                                               | 7.007753245                                |
| 26.18054599                                | 426.9135661                                    | 0.063054205                                               | 7.353209203                                |
| 17.89548352                                | 184.4967832                                    | 0.065953191                                               | 7.035207124                                |
| 21.16963984                                | 396.7048291                                    | 0.066308441                                               | 7.208230944                                |
| 16.06023002                                | 293.2519789                                    | 0.091121268                                               | 6.78929348                                 |
| 13.42727667                                | 77.34219858                                    | 0.089080026                                               | 6.373231655                                |
| 17.99950257                                | 193.233945                                     | 0.075241141                                               | 6.979798444                                |
| 16.05456156                                | 337.9525602                                    | 0.081050734                                               | 6.973859401                                |
| 9.725491488                                | 261.7167689                                    | 0.115036948                                               | 6.729788674                                |
| 17.71077398                                | 220.8014222                                    | 0.071870291                                               | 7.083766604                                |
| 16.93581945                                | 430.9940222                                    | 0.071235472                                               | 6.834126424                                |
| 19.28753445                                | 296.2981966                                    | 0.064190774                                               | 7.070640602                                |
| 24.68668755                                | 318.0974576                                    | 0.059266487                                               | 7.04103168                                 |
| 22.25470801                                | 496.3226593                                    | 0.065705678                                               | 7.097717315                                |
| 15.97924534                                | 185.3429276                                    | 0.101124602                                               | 7.096689233                                |
| 15.20206504                                | 261.271137                                     | 0.079338753                                               | 6.742917731                                |
| 7.18339636                                 | 139.9003559                                    | 0.10887856                                                | 6.523150649                                |
| 19.49179332                                | 239.83407                                      | 0.064291834                                               | 7.330917982                                |
| 18.43447114                                | 440.0193184                                    | 0.074501757                                               | 7.130782098                                |
| 16.6965784                                 | 302.9335095                                    | 0.073252413                                               | 7.059363658                                |
| 17.88685697                                | 217.5310493                                    | 0.065458941                                               | 6.645956497                                |
| 15.95254237                                | 200.5525424                                    | 0.073059466                                               | 6.378251127                                |
| 21.5103377                                 | 166.6636423                                    | 0.066159173                                               | 6.789827755                                |
| 23.25150443                                | 167.9555766                                    | 0.069884327                                               | 6.958884716                                |
| 22.53874184                                | 227.857263                                     | 0.062232294                                               | 7.126849205                                |
| 13.43693001                                | 219.058778                                     | 0.079023285                                               | 6.844518468                                |
| 21.75548035                                | 393.320702                                     | 0.066117384                                               | 7.067243928                                |
| 32.6096786                                 | 382.041229                                     | 0.051370732                                               | 7.237846604                                |
| 13.80883396                                | 217.4352256                                    | 0.09122327                                                | 6.777157015                                |
| 20.21686087                                | 366.7065612                                    | 0.069342994                                               | 7.181253422                                |
| 15.94506255                                | 360.7713101                                    | 0.074901374                                               | 6.968486656                                |
| 25.26028564                                | 358.8925387                                    | 0.058855324                                               | 7.243772384                                |
| 22.62112232                                | 326.2715573                                    | 0.064673793                                               | 7.074065917                                |
| 12.58264433                                | 250.9605096                                    | 0.088082005                                               | 6.963859212                                |
| 15.98998853                                | 242.5378955                                    | 0.077415383                                               | 6.760511919                                |
| 16.54493208                                | 332.6920024                                    | 0.076988115                                               | 6.936579058                                |
| 18.03749116                                | 372.5726477                                    | 0.079045765                                               | 7.062440852                                |
| 22.63591214                                | 713.9552129                                    | 0.078075776                                               | 6.921938897                                |
| 24.25414295                                | 427.0289801                                    | 0.063389695                                               | 7.000425283                                |
| 20.90003457                                | 400.0945837                                    | 0.066859282                                               | 6.973296008                                |
| 8.477733622                                | 86.44359465                                    | 0.114602108                                               | 6.486537479                                |
| 20.88484379                                | 349.5624029                                    | 0.064793238                                               | 7.090093148                                |
| 17.48083095                                | 134.9542314                                    | 0.069179917                                               | 7.225953607                                |
| 24.6641637                                 | 337.6666667                                    | 0.060692905                                               | 7.007794738                                |
| 13.45429521                                | 157.1232337                                    | 0.079523219                                               | 6.903100565                                |
| 7.165089006                                | 74.756691                                      | 0.108672101                                               | 5.870639805                                |
| 15.35565008                                | 143.2647059                                    | 0.076986626                                               | 6.524432694                                |
| 17.12013622                                | 304.1118032                                    | 0.070882645                                               | 6.942268345                                |
| 18.40242419                                | 209.8678733                                    | 0.067458897                                               | 6.709608295                                |
| 12.72104979                                | 214.371959                                     | 0.086022713                                               | 6.634368963                                |
| 15.78397338                                | 371.5132093                                    | 0.081514216                                               | 7.077521631                                |
| 13.61253829                                | 177.3829154                                    | 0.079107988                                               | 7.048846933                                |
| 48.71458406                                | 553.2352941                                    | 0.046454311                                               | 6.80167459                                 |
| 10.93709834                                | 211.3289847                                    | 0.099158379                                               | 6.726511658                                |
| 14.91466504                                | 94.07476636                                    | 0.076109267                                               | 6.397302527                                |
| 10.32371053                                | 87.91441441                                    | 0.099350195                                               | 6.776167992                                |
| 36.02957087                                | 351.1074523                                    | 0.051174575                                               | 6.756382847                                |

| log.sigma.4.5.mm.3D_gldm_DependenceNonUniformity | log.sigma.4.5.mm.3D_gldm_GrayLevelNonUniformity | log.sigma.4.5.mm.3D_gldm_SmallDependenceEmphasis |
|--------------------------------------------------|-------------------------------------------------|--------------------------------------------------|
| 170.3516209                                      | 67.40399002                                     | 0.230528821                                      |
| 272.843                                          | 148.225                                         | 0.175555425                                      |
| 177.2576029                                      | 78.63685152                                     | 0.219415355                                      |
| 329.2095393                                      | 181.0627803                                     | 0.17645613                                       |
| 98.91148577                                      | 84.28134879                                     | 0.174500414                                      |
| 196.6630037                                      | 151.1782662                                     | 0.137083089                                      |
| 83.14947966                                      | 117.7114475                                     | 0.118480327                                      |
| 226.2044321                                      | 116.1889197                                     | 0.185805743                                      |
| 274.8677849                                      | 134.6813024                                     | 0.220255049                                      |
| 463.1425241                                      | 184.2467532                                     | 0.214683522                                      |
| 193.2955174                                      | 174.7354732                                     | 0.118304755                                      |
| 250.8041543                                      | 121.9673591                                     | 0.220795815                                      |
| 285.142028                                       | 276.3622397                                     | 0.136109737                                      |
| 275.3713671                                      | 141.7265877                                     | 0.178002756                                      |
| 208.5943152                                      | 96.19767442                                     | 0.224509126                                      |
| 504.0523242                                      | 267.9286931                                     | 0.195302455                                      |
| 207.7464174                                      | 118.1875389                                     | 0.186581346                                      |
| 282.4222048                                      | 183.1751368                                     | 0.158194392                                      |
| 166.0158451                                      | 87.64788732                                     | 0.220759078                                      |
| 350.7235436                                      | 218.3636677                                     | 0.160854965                                      |
| 907.1766906                                      | 492.2998561                                     | 0.181708006                                      |
| 283.3507779                                      | 146.6209335                                     | 0.189685566                                      |
| 583.9512254                                      | 280.8160641                                     | 0.189733426                                      |
| 143.1359223                                      | 68.38252427                                     | 0.193617595                                      |
| 409.7296467                                      | 161.6198157                                     | 0.215436735                                      |
| 208.5547337                                      | 86.64792899                                     | 0.247892642                                      |
| 338.1334238                                      | 145.797829                                      | 0.221927931                                      |
| 558.9266766                                      | 224.309687                                      | 0.235272604                                      |
| 438.3203883                                      | 265.2447779                                     | 0.183598231                                      |
| 424.9455524                                      | 225.8414055                                     | 0.210522552                                      |
| 549.9531627                                      | 276.532593                                      | 0.183553318                                      |
| 669.782                                          | 339.7724                                        | 0.197607774                                      |
| 311.9877519                                      | 182.1023311                                     | 0.171076102                                      |
| 65.25363825                                      | 33.86902287                                     | 0.212940247                                      |
| 116.1599099                                      | 66.82657658                                     | 0.195592391                                      |
| 411.0447622                                      | 266.0021759                                     | 0.147197109                                      |
| 557.1143177                                      | 210.0557579                                     | 0.217493658                                      |
| 422.597169                                       | 283.0861103                                     | 0.161040532                                      |
| 146.4797844                                      | 148.097035                                      | 0.112517418                                      |
| 173.4633252                                      | 134.8630807                                     | 0.163100686                                      |
| 177.8693009                                      | 107.9756839                                     | 0.199909938                                      |
| 230.7070393                                      | 159.8913043                                     | 0.160192175                                      |
| 350.2362075                                      | 249.3554675                                     | 0.12879249                                       |
| 198.4819533                                      | 156.0456476                                     | 0.175073892                                      |
| 444.1333715                                      | 220.311391                                      | 0.19865303                                       |
| 502.1793007                                      | 235.7826573                                     | 0.175047259                                      |
| 484.0846446                                      | 244.4129137                                     | 0.208521261                                      |
| 171.5897098                                      | 138.1398417                                     | 0.153606482                                      |
| 62.67021277                                      | 50.24113475                                     | 0.178595708                                      |
| 119.7137615                                      | 82.01284404                                     | 0.19285566                                       |
| 429.8669679                                      | 322.9061245                                     | 0.14336987                                       |
| 187.8813906                                      | 225.0122699                                     | 0.098156085                                      |
| 450.9926258                                      | 272.8914933                                     | 0.148138495                                      |
| 164.8872758                                      | 83.41673783                                     | 0.201261323                                      |
| 573.3972568                                      | 252.7190754                                     | 0.20323372                                       |
| 291.4597458                                      | 111.8951271                                     | 0.21332637                                       |
| 447.8429399                                      | 215.4489174                                     | 0.224959247                                      |
| 207.4662829                                      | 245.9350329                                     | 0.133224803                                      |
| 190.3746356                                      | 108.8527697                                     | 0.183394783                                      |
| 164.1985765                                      | 152.9743772                                     | 0.108966                                         |
| 321.482829                                       | 189.0822849                                     | 0.179963187                                      |
| 665.3196647                                      | 408.7911427                                     | 0.169440446                                      |
| 282.0444738                                      | 166.3562307                                     | 0.191334181                                      |
| 320.4057816                                      | 122.2773019                                     | 0.220667334                                      |
| 92.25084746                                      | 43.10508475                                     | 0.271922197                                      |
| 226.3959819                                      | 102.0836034                                     | 0.211850391                                      |
| 120.7561437                                      | 73.93761815                                     | 0.179144296                                      |
| 476.9024117                                      | 221.9203589                                     | 0.18282188                                       |
| 158.9535963                                      | 102.1771075                                     | 0.151242347                                      |
| 348.484643                                       | 165.7562824                                     | 0.191343956                                      |
| 622.2988445                                      | 195.6197479                                     | 0.251223712                                      |
| 240.0606502                                      | 188.0111596                                     | 0.14729736                                       |
| 596.2472751                                      | 324.4558666                                     | 0.190446516                                      |
| 897.8732914                                      | 487.6828444                                     | 0.17312722                                       |
| 598.6133271                                      | 250.841389                                      | 0.212191065                                      |
| 313.9412269                                      | 150.7546118                                     | 0.202176496                                      |
| 247.9299363                                      | 207.433121                                      | 0.144501409                                      |
| 188.714496                                       | 105.2075055                                     | 0.173521743                                      |
| 445.957265                                       | 252.2130647                                     | 0.178330147                                      |
| 539.0107792                                      | 351.9907927                                     | 0.170814905                                      |
| 173.0499266                                      | 106.339207                                      | 0.200073997                                      |
| 405.8724125                                      | 168.4264208                                     | 0.230433922                                      |
| 365.6313662                                      | 165.4098626                                     | 0.207456715                                      |
| 45.24474187                                      | 59.93690249                                     | 0.132218249                                      |
| 556.814086                                       | 250.2314863                                     | 0.203011025                                      |
| 402.337939                                       | 240.3310305                                     | 0.161959144                                      |
| 218.4313725                                      | 86.66946779                                     | 0.230985751                                      |
| 378.2783437                                      | 241.9891554                                     | 0.148316575                                      |
| 56.17274939                                      | 44.66423358                                     | 0.201169585                                      |
| 83.61937716                                      | 44.4982699                                      | 0.191743773                                      |
| 427.4254126                                      | 227.6041732                                     | 0.18577411                                       |
| 173.3674208                                      | 74.54208145                                     | 0.213229033                                      |
| 223.2650448                                      | 134.3674776                                     | 0.16783349                                       |
| 513.7296118                                      | 354.8313807                                     | 0.146880893                                      |
| 577.358691                                       | 372.2821929                                     | 0.16575849                                       |
| 186.760181                                       | 41.06561086                                     | 0.36260041                                       |
| 191.9642655                                      | 174.8162223                                     | 0.139900101                                      |
| 58.39252336                                      | 32.57476636                                     | 0.201963996                                      |
| 88.15315315                                      | 88.22297297                                     | 0.123846329                                      |
| 253.6897747                                      | 59.05545927                                     | 0.328629564                                      |

| log.sigma.4.5.mm.3D_gldm_DependenceNonUniformityNormalized | log.sigma.4.5.mm.3D_gldm_DependenceVariance | log.sigma.4.5.mm.3D_gldm_LargeDependenceEmphasis |
|------------------------------------------------------------|---------------------------------------------|--------------------------------------------------|
| 0.14160567                                                 | 5.541766255                                 | 20.22028263                                      |
| 0.1364215                                                  | 5.277756                                    | 22.6                                             |
| 0.15854884                                                 | 4.375350821                                 | 17.57602862                                      |
| 0.134206906                                                | 5.877829073                                 | 23.50550347                                      |
| 0.104227066                                                | 11.34242356                                 | 36.80821918                                      |
| 0.120062884                                                | 6.517140979                                 | 29.50793651                                      |
| 0.078665544                                                | 18.11362552                                 | 60.51750237                                      |
| 0.125321015                                                | 5.672481335                                 | 23.97950139                                      |
| 0.135603249                                                | 6.948520577                                 | 23.22200296                                      |
| 0.154226615                                                | 4.681801271                                 | 18.39127539                                      |
| 0.106970403                                                | 8.128006164                                 | 35.49474267                                      |
| 0.148845195                                                | 4.964867525                                 | 19.0462908                                       |
| 0.097351324                                                | 12.6275494                                  | 42.95834756                                      |
| 0.148208486                                                | 4.301698297                                 | 19.9590958                                       |
| 0.13475085                                                 | 6.627891954                                 | 22.65891473                                      |
| 0.122670315                                                | 15.81083176                                 | 38.3253833                                       |
| 0.12943702                                                 | 6.09983754                                  | 23.89719626                                      |
| 0.11040743                                                 | 8.770448962                                 | 32.45895231                                      |
| 0.146140709                                                | 4.268485915                                 | 18.33098592                                      |
| 0.120897464                                                | 6.879285525                                 | 27.61771803                                      |
| 0.13052902                                                 | 6.414153802                                 | 24.48460432                                      |
| 0.133593012                                                | 6.364408718                                 | 23.73927393                                      |
| 0.141701341                                                | 5.245558214                                 | 21.27469061                                      |
| 0.138966915                                                | 5.600279008                                 | 21.92815534                                      |
| 0.157346254                                                | 4.469449105                                 | 17.84639017                                      |
| 0.15425646                                                 | 5.570636095                                 | 18.78106509                                      |
| 0.152932349                                                | 4.20382852                                  | 17.65490728                                      |
| 0.166595135                                                | 3.609731677                                 | 15.41013413                                      |
| 0.128955689                                                | 5.430061504                                 | 23.33598117                                      |
| 0.13451901                                                 | 6.032128166                                 | 22.2073441                                       |
| 0.132774786                                                | 5.4149958                                   | 22.72718493                                      |
| 0.1339564                                                  | 6.03386224                                  | 22.7816                                          |
| 0.123266595                                                | 6.342023312                                 | 26.40576847                                      |
| 0.13566245                                                 | 10.36922385                                 | 28.97920998                                      |
| 0.130810709                                                | 6.764771528                                 | 24.38963964                                      |
| 0.127772696                                                | 5.966427576                                 | 26.29623873                                      |
| 0.156098156                                                | 4.046161174                                 | 17.26281872                                      |
| 0.12462317                                                 | 6.289506779                                 | 26.51164848                                      |
| 0.098706054                                                | 10.69916486                                 | 42.57142857                                      |
| 0.106028927                                                | 11.21922544                                 | 36.67359413                                      |
| 0.135159043                                                | 6.456197282                                 | 23.28115502                                      |
| 0.119413581                                                | 8.080159159                                 | 29.71325052                                      |
| 0.115704066                                                | 8.299715511                                 | 33.14139412                                      |
| 0.105351355                                                | 9.622809805                                 | 33.74946921                                      |
| 0.127113157                                                | 10.46734102                                 | 30.06582713                                      |
| 0.140469734                                                | 4.53219197                                  | 21.0441958                                       |
| 0.131330614                                                | 6.889332987                                 | 23.8898535                                       |
| 0.113185824                                                | 7.218640569                                 | 29.91292876                                      |
| 0.111117399                                                | 8.202039636                                 | 30.54609929                                      |
| 0.109829139                                                | 10.41725781                                 | 33.1412844                                       |
| 0.107898335                                                | 7.906051667                                 | 32.82078313                                      |
| 0.096053881                                                | 10.06138001                                 | 44.59202454                                      |
| 0.11877604                                                 | 6.790998868                                 | 29.09217804                                      |
| 0.140808946                                                | 5.381878167                                 | 21.17079419                                      |
| 0.145643195                                                | 5.009591955                                 | 20.01955804                                      |
| 0.154374865                                                | 4.326000745                                 | 17.86122881                                      |
| 0.136579122                                                | 6.260718885                                 | 21.86550778                                      |
| 0.08530686                                                 | 15.80920444                                 | 52.15542763                                      |
| 0.138757023                                                | 5.00881648                                  | 21.53790087                                      |
| 0.116867314                                                | 6.670212383                                 | 32.6911032                                       |
| 0.10931072                                                 | 10.41752979                                 | 33.96361782                                      |
| 0.121253812                                                | 6.806823053                                 | 26.95443776                                      |
| 0.124193956                                                | 6.797299281                                 | 25.57507706                                      |
| 0.171523438                                                | 3.07093549                                  | 14.80192719                                      |
| 0.156357369                                                | 4.751462223                                 | 16.89491525                                      |
| 0.146724551                                                | 4.719324913                                 | 19.16720674                                      |
| 0.114136242                                                | 8.111795627                                 | 29.49149338                                      |
| 0.133735954                                                | 4.880983829                                 | 22.07347168                                      |
| 0.122933949                                                | 5.970636104                                 | 26.67208043                                      |
| 0.139004644                                                | 5.90138979                                  | 22.46469884                                      |
| 0.163418814                                                | 4.177937811                                 | 15.97268908                                      |
| 0.116477754                                                | 6.211111794                                 | 28.43037361                                      |
| 0.127430493                                                | 7.029419257                                 | 25.3787134                                       |
| 0.137900982                                                | 5.073940746                                 | 22.1138074                                       |
| 0.14045362                                                 | 5.201625531                                 | 20.37541061                                      |
| 0.134680921                                                | 5.818839247                                 | 22.2020592                                       |
| 0.105278105                                                | 8.276070519                                 | 33.85690021                                      |
| 0.138862764                                                | 4.98277366                                  | 21.78734364                                      |
| 0.136128591                                                | 5.275836326                                 | 22.32295482                                      |
| 0.121044415                                                | 7.430592415                                 | 27.80305412                                      |
| 0.127055746                                                | 6.425298807                                 | 24.09985316                                      |
| 0.152755895                                                | 4.518734288                                 | 17.70681219                                      |
| 0.147789558                                                | 4.403779583                                 | 18.8585287                                       |
| 0.086510023                                                | 15.88070004                                 | 52.50286807                                      |
| 0.14417765                                                 | 4.847183823                                 | 19.88037286                                      |
| 0.11581403                                                 | 8.159339765                                 | 30.417962                                        |
| 0.152963146                                                | 4.851881929                                 | 18.21428571                                      |
| 0.12431099                                                 | 5.94994562                                  | 26.74630299                                      |
| 0.136673356                                                | 5.31010354                                  | 21.60340633                                      |
| 0.144670203                                                | 5.371978305                                 | 21.04152249                                      |
| 0.133112866                                                | 5.251218052                                 | 22.43070694                                      |
| 0.156893593                                                | 4.003952417                                 | 17.25882353                                      |
| 0.142935368                                                | 4.533825933                                 | 21.18565941                                      |
| 0.11801737                                                 | 7.277916917                                 | 29.51045256                                      |
| 0.122685655                                                | 6.462279709                                 | 26.58053549                                      |
| 0.211267173                                                | 2.56003665                                  | 9.79638009                                       |
| 0.108885006                                                | 7.64912397                                  | 33.16222348                                      |
| 0.136431129                                                | 7.683247445                                 | 24.90186916                                      |
| 0.099271569                                                | 13.40746997                                 | 44.58108108                                      |
| 0.21983516                                                 | 2.613584278                                 | 10.14038128                                      |

|                                                              |                                                               |                                                               |
|--------------------------------------------------------------|---------------------------------------------------------------|---------------------------------------------------------------|
| log.sigma.4.5.mm.3D_gldm_LargeDependenceLowGrayLevelEmphasis | log.sigma.4.5.mm.3D_gldm_SmallDependenceHighGrayLevelEmphasis | log.sigma.4.5.mm.3D_gldm_LargeDependenceHighGrayLevelEmphasis |
| 0.172470905                                                  | 58.6160064                                                    | 3879.070657                                                   |
| 0.101746575                                                  | 55.62713103                                                   | 6246.5925                                                     |
| 0.102716952                                                  | 47.36908086                                                   | 4409.805009                                                   |
| 0.283300953                                                  | 27.09568115                                                   | 2945.436608                                                   |
| 0.532433174                                                  | 27.54343016                                                   | 3467.829294                                                   |
| 0.389669894                                                  | 18.82258646                                                   | 3145.349206                                                   |
| 2.166742596                                                  | 11.762244                                                     | 2615.641438                                                   |
| 0.111421989                                                  | 59.22742382                                                   | 6705.561219                                                   |
| 0.176404338                                                  | 47.70227339                                                   | 4056.442526                                                   |
| 0.035101839                                                  | 125.8532034                                                   | 11197.72494                                                   |
| 0.442157572                                                  | 14.73396049                                                   | 3691.256779                                                   |
| 0.100856498                                                  | 55.74424647                                                   | 4803.956083                                                   |
| 0.319318678                                                  | 26.42438388                                                   | 6588.061454                                                   |
| 0.303715023                                                  | 22.2295141                                                    | 2571.430571                                                   |
| 0.135512965                                                  | 55.52515842                                                   | 5007.812016                                                   |
| 0.188524009                                                  | 71.40297639                                                   | 10851.46167                                                   |
| 0.069676349                                                  | 65.21661585                                                   | 9390.835514                                                   |
| 0.192133344                                                  | 44.20216289                                                   | 6932.3319                                                     |
| 0.08518555                                                   | 59.78177758                                                   | 4832.640845                                                   |
| 0.229976808                                                  | 36.56190284                                                   | 5566.18304                                                    |
| 0.080806838                                                  | 62.31693329                                                   | 8891.08259                                                    |
| 0.096059724                                                  | 59.33333926                                                   | 7258.430457                                                   |
| 0.099470445                                                  | 58.51135913                                                   | 6034.691822                                                   |
| 0.229044761                                                  | 40.14589179                                                   | 3517.230097                                                   |
| 0.250938898                                                  | 40.91704559                                                   | 3804.110599                                                   |
| 0.082964217                                                  | 83.79005327                                                   | 5291.053254                                                   |
| 0.113951404                                                  | 46.95148018                                                   | 3851.911805                                                   |
| 0.099164706                                                  | 53.14656546                                                   | 4217.204471                                                   |
| 0.084336267                                                  | 59.30770628                                                   | 7995.928508                                                   |
| 0.058811993                                                  | 82.96103061                                                   | 9314.232352                                                   |
| 0.069181421                                                  | 68.26052273                                                   | 9251.93578                                                    |
| 0.112016639                                                  | 65.76398566                                                   | 7347.2234                                                     |
| 0.059688377                                                  | 101.017182                                                    | 14487.50217                                                   |
| 0.365335002                                                  | 36.99698371                                                   | 3292.276507                                                   |
| 0.223076011                                                  | 28.53052901                                                   | 3997.850225                                                   |
| 0.135990816                                                  | 35.45635493                                                   | 5996.276344                                                   |
| 0.046719999                                                  | 97.49693401                                                   | 8174.257495                                                   |
| 0.113759207                                                  | 42.3175686                                                    | 7294.056031                                                   |
| 0.307432446                                                  | 21.76622666                                                   | 6739.231132                                                   |
| 0.60497132                                                   | 23.63938033                                                   | 3242.21577                                                    |
| 0.238579184                                                  | 28.09759519                                                   | 3059.508359                                                   |
| 0.306145796                                                  | 26.88756007                                                   | 3682.704969                                                   |
| 0.161671666                                                  | 34.91060509                                                   | 7949.243145                                                   |
| 0.396446802                                                  | 31.37974336                                                   | 3875.896497                                                   |
| 0.088473212                                                  | 77.89119127                                                   | 12408.21294                                                   |
| 0.218443555                                                  | 31.10938163                                                   | 4161.955245                                                   |
| 0.091865224                                                  | 83.0943535                                                    | 8928.118285                                                   |
| 0.128409799                                                  | 39.56567688                                                   | 9485.856201                                                   |
| 1.572969967                                                  | 15.65264833                                                   | 1581.455674                                                   |
| 0.284766225                                                  | 43.74146135                                                   | 4759.905505                                                   |
| 0.127644179                                                  | 49.45749681                                                   | 9922.323042                                                   |
| 0.210851916                                                  | 25.64041892                                                   | 10907.35992                                                   |
| 0.20205402                                                   | 36.42873569                                                   | 5365.167501                                                   |
| 0.058027308                                                  | 79.52520493                                                   | 9013.140905                                                   |
| 0.091787594                                                  | 58.90589428                                                   | 5699.114046                                                   |
| 0.082881573                                                  | 71.23913618                                                   | 5272.572034                                                   |
| 0.059069684                                                  | 107.0066026                                                   | 10047.72736                                                   |
| 0.442605557                                                  | 29.48322822                                                   | 7098.149671                                                   |
| 0.109272252                                                  | 44.9938536                                                    | 5398.120991                                                   |
| 0.280446799                                                  | 13.81472529                                                   | 4578.566548                                                   |
| 0.234290064                                                  | 42.68260753                                                   | 6504.50799                                                    |
| 0.071389408                                                  | 71.59023625                                                   | 11533.98323                                                   |
| 0.105356801                                                  | 57.25395084                                                   | 7608.691325                                                   |
| 0.094383864                                                  | 41.27744551                                                   | 3576.061028                                                   |
| 0.118514598                                                  | 46.83023084                                                   | 3285.711864                                                   |
| 0.25295833                                                   | 41.87171822                                                   | 2507.942968                                                   |
| 0.377020528                                                  | 39.99266375                                                   | 3522.44707                                                    |
| 0.157766014                                                  | 42.86505132                                                   | 4627.783791                                                   |
| 0.156322154                                                  | 30.18690517                                                   | 5822.458623                                                   |
| 0.075111367                                                  | 76.99354393                                                   | 7990.619465                                                   |
| 0.08139841                                                   | 91.76930069                                                   | 6173.561712                                                   |
| 0.173750142                                                  | 33.58269969                                                   | 5418.014556                                                   |
| 0.106715095                                                  | 70.76618996                                                   | 8339.003633                                                   |
| 0.071380308                                                  | 58.02269667                                                   | 8209.885732                                                   |
| 0.080589473                                                  | 81.55466151                                                   | 6656.679493                                                   |
| 0.104144386                                                  | 64.34306648                                                   | 6817.909481                                                   |
| 0.159605069                                                  | 33.68085007                                                   | 8263.790234                                                   |
| 0.126956665                                                  | 40.34327264                                                   | 4962.988227                                                   |
| 0.076888209                                                  | 56.10592275                                                   | 7610.765873                                                   |
| 0.086644119                                                  | 59.18514711                                                   | 10358.13294                                                   |
| 0.037051138                                                  | 136.9001543                                                   | 16963.55874                                                   |
| 0.052955468                                                  | 92.35136329                                                   | 7641.981935                                                   |
| 0.059581927                                                  | 85.6781886                                                    | 7071.315279                                                   |
| 1.17865336                                                   | 11.71247928                                                   | 3029.770554                                                   |
| 0.085687061                                                  | 67.44644699                                                   | 7027.182289                                                   |
| 0.489752878                                                  | 22.80338787                                                   | 3312.916811                                                   |
| 0.074061193                                                  | 79.62213152                                                   | 5842.952381                                                   |
| 0.26458202                                                   | 23.7705135                                                    | 3771.781137                                                   |
| 0.452541582                                                  | 12.34749478                                                   | 1833.510949                                                   |
| 0.297815933                                                  | 26.38518006                                                   | 3030.614187                                                   |
| 0.101709555                                                  | 59.30066835                                                   | 5955.535036                                                   |
| 0.116771966                                                  | 42.24359118                                                   | 3601.230769                                                   |
| 0.120277636                                                  | 32.16109151                                                   | 4810.457746                                                   |
| 0.093812526                                                  | 54.31356308                                                   | 10662.14725                                                   |
| 0.243668721                                                  | 29.25602062                                                   | 4416.225244                                                   |
| 0.0389021                                                    | 172.8565482                                                   | 6153.975113                                                   |
| 0.198144261                                                  | 30.47862912                                                   | 6340.177538                                                   |
| 0.915529743                                                  | 19.11606171                                                   | 1527.64486                                                    |
| 0.919948141                                                  | 12.01855279                                                   | 2940.932432                                                   |
| 0.073572108                                                  | 105.6542704                                                   | 4003.195841                                                   |

| log.sigma.4.5.mm.3D_gldm_SmallDependenceLowGrayLevelEmphasis | log.sigma.4.5.mm.3D_gldm_LowGrayLevelEmphasis | log.sigma.4.5.mm.3D_gldzm_DistanceZoneVariabilityNormalized |
|--------------------------------------------------------------|-----------------------------------------------|-------------------------------------------------------------|
| 0.002462488                                                  | 0.01075233                                    | 1                                                           |
| 0.001410219                                                  | 0.005256233                                   | 1                                                           |
| 0.00286161                                                   | 0.008430709                                   | 1                                                           |
| 0.003049273                                                  | 0.013556267                                   | 1                                                           |
| 0.002796637                                                  | 0.017051178                                   | 1                                                           |
| 0.002823587                                                  | 0.015599919                                   | 1                                                           |
| 0.002976603                                                  | 0.031140486                                   | 1                                                           |
| 0.001727601                                                  | 0.005754498                                   | 1                                                           |
| 0.002496749                                                  | 0.007961555                                   | 1                                                           |
| 0.000827659                                                  | 0.002453883                                   | 1                                                           |
| 0.002331396                                                  | 0.013166177                                   | 1                                                           |
| 0.001887348                                                  | 0.007041926                                   | 1                                                           |
| 0.001621187                                                  | 0.008054949                                   | 1                                                           |
| 0.00447616                                                   | 0.02001941                                    | 1                                                           |
| 0.002646753                                                  | 0.007275564                                   | 1                                                           |
| 0.001055522                                                  | 0.005550359                                   | 0.997870077                                                 |
| 0.001857902                                                  | 0.004584752                                   | 1                                                           |
| 0.001301717                                                  | 0.005746097                                   | 1                                                           |
| 0.002050027                                                  | 0.005715361                                   | 1                                                           |
| 0.00157468                                                   | 0.010598445                                   | 1                                                           |
| 0.001018225                                                  | 0.003917344                                   | 0.99724708                                                  |
| 0.001427964                                                  | 0.005014852                                   | 1                                                           |
| 0.001182848                                                  | 0.00557272                                    | 1                                                           |
| 0.003526879                                                  | 0.014168709                                   | 1                                                           |
| 0.003158544                                                  | 0.014593966                                   | 0.997118162                                                 |
| 0.002186797                                                  | 0.005605392                                   | 1                                                           |
| 0.002736013                                                  | 0.008025606                                   | 1                                                           |
| 0.002095094                                                  | 0.007908487                                   | 1                                                           |
| 0.00190864                                                   | 0.005018021                                   | 0.997063149                                                 |
| 0.001290276                                                  | 0.003517968                                   | 1                                                           |
| 0.001068698                                                  | 0.003866278                                   | 0.997674422                                                 |
| 0.000983124                                                  | 0.005543437                                   | 1                                                           |
| 0.00095252                                                   | 0.003101172                                   | 1                                                           |
| 0.004383764                                                  | 0.015238649                                   | 1                                                           |
| 0.003998518                                                  | 0.015764892                                   | 1                                                           |
| 0.001167431                                                  | 0.006059516                                   | 1                                                           |
| 0.001177117                                                  | 0.003485661                                   | 0.997755334                                                 |
| 0.001332604                                                  | 0.005603727                                   | 1                                                           |
| 0.002012205                                                  | 0.008344645                                   | 1                                                           |
| 0.003733683                                                  | 0.017001873                                   | 1                                                           |
| 0.004260618                                                  | 0.012952048                                   | 1                                                           |
| 0.002278726                                                  | 0.010090049                                   | 1                                                           |
| 0.00152286                                                   | 0.00544464                                    | 1                                                           |
| 0.003048583                                                  | 0.013235108                                   | 1                                                           |
| 0.001301878                                                  | 0.004222232                                   | 1                                                           |
| 0.002104849                                                  | 0.012376577                                   | 1                                                           |
| 0.001000963                                                  | 0.004481914                                   | 0.988876877                                                 |
| 0.002119321                                                  | 0.008099482                                   | 1                                                           |
| 0.005379921                                                  | 0.044312053                                   | 1                                                           |
| 0.002516641                                                  | 0.008892217                                   | 1                                                           |
| 0.000860396                                                  | 0.004607619                                   | 1                                                           |
| 0.001193108                                                  | 0.005747912                                   | 1                                                           |
| 0.00126625                                                   | 0.006920513                                   | 1                                                           |
| 0.001535952                                                  | 0.003673907                                   | 1                                                           |
| 0.001406059                                                  | 0.005270507                                   | 1                                                           |
| 0.001802545                                                  | 0.005675002                                   | 1                                                           |
| 0.001445898                                                  | 0.003701814                                   | 0.992907891                                                 |
| 0.00151262                                                   | 0.008544164                                   | 1                                                           |
| 0.001762127                                                  | 0.007142217                                   | 1                                                           |
| 0.001744128                                                  | 0.011035631                                   | 1                                                           |
| 0.001629909                                                  | 0.006729938                                   | 1                                                           |
| 0.000901807                                                  | 0.003283141                                   | 1                                                           |
| 0.001516553                                                  | 0.00539614                                    | 1                                                           |
| 0.003019198                                                  | 0.008423876                                   | 1                                                           |
| 0.004531383                                                  | 0.009422069                                   | 1                                                           |
| 0.002262422                                                  | 0.012872638                                   | 1                                                           |
| 0.002821633                                                  | 0.013070059                                   | 1                                                           |
| 0.002025171                                                  | 0.00800488                                    | 1                                                           |
| 0.002125098                                                  | 0.007279867                                   | 1                                                           |
| 0.00116968                                                   | 0.00401757                                    | 1                                                           |
| 0.002052046                                                  | 0.006002022                                   | 1                                                           |
| 0.001729795                                                  | 0.006785766                                   | 1                                                           |
| 0.000901476                                                  | 0.004761774                                   | 1                                                           |
| 0.000893112                                                  | 0.003819402                                   | 1                                                           |
| 0.001309401                                                  | 0.00470507                                    | 1                                                           |
| 0.001425884                                                  | 0.006268516                                   | 1                                                           |
| 0.001642626                                                  | 0.006141076                                   | 1                                                           |
| 0.002158132                                                  | 0.007474405                                   | 1                                                           |
| 0.001240258                                                  | 0.004424335                                   | 1                                                           |
| 0.001060438                                                  | 0.004025124                                   | 1                                                           |
| 0.001215379                                                  | 0.002510268                                   | 1                                                           |
| 0.001226196                                                  | 0.004272776                                   | 1                                                           |
| 0.001277494                                                  | 0.003825029                                   | 1                                                           |
| 0.00360139                                                   | 0.021166696                                   | 1                                                           |
| 0.001495016                                                  | 0.005503098                                   | 0.997780247                                                 |
| 0.003038297                                                  | 0.015784547                                   | 1                                                           |
| 0.001945553                                                  | 0.005533758                                   | 1                                                           |
| 0.002341028                                                  | 0.010837864                                   | 1                                                           |
| 0.008588547                                                  | 0.02502815                                    | 1                                                           |
| 0.00452711                                                   | 0.021226409                                   | 1                                                           |
| 0.001142373                                                  | 0.004529494                                   | 1                                                           |
| 0.005963554                                                  | 0.011532351                                   | 1                                                           |
| 0.00192631                                                   | 0.008506757                                   | 1                                                           |
| 0.000801408                                                  | 0.00372476                                    | 1                                                           |
| 0.002203094                                                  | 0.010527573                                   | 1                                                           |
| 0.004228427                                                  | 0.007319958                                   | 1                                                           |
| 0.0016729                                                    | 0.006726826                                   | 1                                                           |
| 0.009277204                                                  | 0.030776534                                   | 1                                                           |
| 0.004033091                                                  | 0.021174592                                   | 1                                                           |
| 0.004415275                                                  | 0.009870712                                   | 1                                                           |

| log.sigma.4.5.mm.3D_gldzm_LowIntensityEmphasis | log.sigma.4.5.mm.3D_gldzm_LargeDistanceEmphasis | log.sigma.4.5.mm.3D_gldzm_HighIntensitySmallDistanceEmphasis |
|------------------------------------------------|-------------------------------------------------|--------------------------------------------------------------|
| 0.01315124                                     | 1                                               | 260.1487342                                                  |
| 0.008205934                                    | 1                                               | 324.8303797                                                  |
| 0.012784987                                    | 1                                               | 215.2508039                                                  |
| 0.018284301                                    | 1                                               | 160.0785124                                                  |
| 0.019413109                                    | 1                                               | 167.6030151                                                  |
| 0.023048228                                    | 1                                               | 143.1890756                                                  |
| 0.029027725                                    | 1                                               | 102.3897059                                                  |
| 0.009347828                                    | 1                                               | 328.1917098                                                  |
| 0.01116534                                     | 1                                               | 220.4772277                                                  |
| 0.003699563                                    | 1                                               | 591.0091027                                                  |
| 0.021971473                                    | 1                                               | 124.7042254                                                  |
| 0.00958809                                     | 1                                               | 255.3456221                                                  |
| 0.012082962                                    | 1                                               | 200.7103448                                                  |
| 0.028350768                                    | 1                                               | 126.9573333                                                  |
| 0.010954052                                    | 1                                               | 257.7559809                                                  |
| 0.006493279                                    | 1.003198294                                     | 367.3763326                                                  |
| 0.009347412                                    | 1                                               | 352.3887324                                                  |
| 0.008140818                                    | 1                                               | 285.0693512                                                  |
| 0.00890629                                     | 1                                               | 271.8339223                                                  |
| 0.013299463                                    | 1                                               | 233.1401152                                                  |
| 0.005717102                                    | 1.004135079                                     | 339.3895589                                                  |
| 0.007443967                                    | 1                                               | 320.6277056                                                  |
| 0.007019113                                    | 1                                               | 312.5264293                                                  |
| 0.020068918                                    | 1                                               | 209.6224066                                                  |
| 0.015214666                                    | 1.004329004                                     | 189.8860029                                                  |
| 0.008403036                                    | 1                                               | 347.535                                                      |
| 0.012058529                                    | 1                                               | 215.8435252                                                  |
| 0.009871673                                    | 1                                               | 228.4984227                                                  |
| 0.010326665                                    | 1.004411765                                     | 328.9444853                                                  |
| 0.005867908                                    | 1                                               | 395.6284224                                                  |
| 0.005976442                                    | 1.003492433                                     | 367.0279395                                                  |
| 0.005674952                                    | 1                                               | 339.0744681                                                  |
| 0.005791155                                    | 1                                               | 600.6773504                                                  |
| 0.022644469                                    | 1                                               | 180.1102362                                                  |
| 0.022207394                                    | 1                                               | 149.6495327                                                  |
| 0.00925921                                     | 1                                               | 239.916996                                                   |
| 0.005420143                                    | 1.003370787                                     | 455.5598315                                                  |
| 0.009397076                                    | 1                                               | 262.2852234                                                  |
| 0.017901081                                    | 1                                               | 194.0110497                                                  |
| 0.022698558                                    | 1                                               | 155.4115646                                                  |
| 0.021658849                                    | 1                                               | 143.5748299                                                  |
| 0.01366774                                     | 1                                               | 175.0655271                                                  |
| 0.012297729                                    | 1                                               | 272.308094                                                   |
| 0.018985022                                    | 1                                               | 189.6747967                                                  |
| 0.006647716                                    | 1                                               | 389.0325407                                                  |
| 0.014656617                                    | 1                                               | 177.8909884                                                  |
| 0.005584489                                    | 1.016778523                                     | 402.8548658                                                  |
| 0.016639425                                    | 1                                               | 251.6641509                                                  |
| 0.034507632                                    | 1                                               | 90.95762712                                                  |
| 0.012451777                                    | 1                                               | 239.2833333                                                  |
| 0.007182711                                    | 1                                               | 352.6176471                                                  |
| 0.012915508                                    | 1                                               | 265.7355769                                                  |
| 0.008776037                                    | 1                                               | 260.5927835                                                  |
| 0.007157743                                    | 1                                               | 406.0378788                                                  |
| 0.007037426                                    | 1                                               | 292.8026608                                                  |
| 0.008345764                                    | 1                                               | 338.4894515                                                  |
| 0.006403593                                    | 1.010676157                                     | 481.8650652                                                  |
| 0.011630851                                    | 1                                               | 234.7247956                                                  |
| 0.011274464                                    | 1                                               | 253.6                                                        |
| 0.020619763                                    | 1                                               | 122.1768293                                                  |
| 0.009084028                                    | 1                                               | 244.7487179                                                  |
| 0.005572739                                    | 1                                               | 421.8670635                                                  |
| 0.008128679                                    | 1                                               | 305.6960608                                                  |
| 0.013448258                                    | 1                                               | 185.8574423                                                  |
| 0.015645889                                    | 1                                               | 176.6630435                                                  |
| 0.011968611                                    | 1                                               | 210.2624672                                                  |
| 0.015351662                                    | 1                                               | 230.9910714                                                  |
| 0.01129062                                     | 1                                               | 241.3225806                                                  |
| 0.013843472                                    | 1                                               | 197.0542986                                                  |
| 0.006056                                       | 1                                               | 409.6189624                                                  |
| 0.008039434                                    | 1                                               | 365.1089799                                                  |
| 0.011520546                                    | 1                                               | 242.8266254                                                  |
| 0.005164681                                    | 1                                               | 382.1743389                                                  |
| 0.00543981                                     | 1                                               | 329.0751819                                                  |
| 0.006320235                                    | 1                                               | 391.3731778                                                  |
| 0.00851644                                     | 1                                               | 322.6593807                                                  |
| 0.011942113                                    | 1                                               | 227.184492                                                   |
| 0.01214306                                     | 1                                               | 239.5944056                                                  |
| 0.006923387                                    | 1                                               | 311.6443452                                                  |
| 0.006323864                                    | 1                                               | 344.4597049                                                  |
| 0.005563927                                    | 1                                               | 699.9213836                                                  |
| 0.00607169                                     | 1                                               | 400.9299451                                                  |
| 0.006019902                                    | 1                                               | 417.9468268                                                  |
| 0.030661376                                    | 1                                               | 92.79761905                                                  |
| 0.008000284                                    | 1.003333333                                     | 334.7058333                                                  |
| 0.020659834                                    | 1                                               | 143.7601958                                                  |
| 0.008187318                                    | 1                                               | 345.3274559                                                  |
| 0.016354248                                    | 1                                               | 168.7452632                                                  |
| 0.041232992                                    | 1                                               | 61.41304348                                                  |
| 0.026395958                                    | 1                                               | 134.9264706                                                  |
| 0.005957524                                    | 1                                               | 329.0877458                                                  |
| 0.024964212                                    | 1                                               | 206.7900356                                                  |
| 0.013436066                                    | 1                                               | 190.5590062                                                  |
| 0.005685525                                    | 1                                               | 373.9157143                                                  |
| 0.01427549                                     | 1                                               | 180.9420804                                                  |
| 0.010807359                                    | 1                                               | 484.0798969                                                  |
| 0.01173882                                     | 1                                               | 223.1685393                                                  |
| 0.040764204                                    | 1                                               | 107.3047619                                                  |
| 0.030532859                                    | 1                                               | 102.8175182                                                  |
| 0.013148787                                    | 1                                               | 322.6485356                                                  |

| log.sigma.4.5.mm.3D_gldzm_LowIntensityLargeDistanceEmphasis | log.sigma.4.5.mm.3D_gldzm_HighIntensityEmphasis | log.sigma.4.5.mm.3D_gldzm_DistanceZoneVariability | log.sigma.4.5.mm.3D_gldzm_ZonePercentage |
|-------------------------------------------------------------|-------------------------------------------------|---------------------------------------------------|------------------------------------------|
| 0.01315124                                                  | 260.1487342                                     | 316                                               | 0.262676642                              |
| 0.008205934                                                 | 324.8303797                                     | 395                                               | 0.1975                                   |
| 0.012784987                                                 | 215.2508039                                     | 311                                               | 0.278175313                              |
| 0.018284301                                                 | 160.0785124                                     | 484                                               | 0.197309417                              |
| 0.019413109                                                 | 167.6030151                                     | 199                                               | 0.209694415                              |
| 0.023048228                                                 | 143.1890756                                     | 238                                               | 0.145299145                              |
| 0.029027725                                                 | 102.3897059                                     | 136                                               | 0.128666036                              |
| 0.009347828                                                 | 328.1917098                                     | 386                                               | 0.213850416                              |
| 0.01116534                                                  | 220.4772277                                     | 505                                               | 0.249136655                              |
| 0.003699563                                                 | 591.0091027                                     | 769                                               | 0.256077256                              |
| 0.021971473                                                 | 124.7042254                                     | 213                                               | 0.117874931                              |
| 0.00958809                                                  | 255.3456221                                     | 434                                               | 0.257566766                              |
| 0.012082962                                                 | 200.7103448                                     | 435                                               | 0.148514851                              |
| 0.028350768                                                 | 126.9573333                                     | 375                                               | 0.201829925                              |
| 0.010954052                                                 | 257.7559809                                     | 418                                               | 0.27002584                               |
| 0.006499887                                                 | 367.7633262                                     | 936.0021322                                       | 0.228279387                              |
| 0.009347412                                                 | 352.3887324                                     | 355                                               | 0.221183801                              |
| 0.008140818                                                 | 285.0693512                                     | 447                                               | 0.174745895                              |
| 0.008990629                                                 | 271.8339223                                     | 283                                               | 0.249119718                              |
| 0.013299463                                                 | 233.1401152                                     | 521                                               | 0.179593244                              |
| 0.005724682                                                 | 339.9627843                                     | 1447.005513                                       | 0.208776978                              |
| 0.007443967                                                 | 320.6277056                                     | 462                                               | 0.217821782                              |
| 0.007019113                                                 | 312.5264293                                     | 927                                               | 0.224945402                              |
| 0.020068918                                                 | 209.6224066                                     | 241                                               | 0.233980583                              |
| 0.015236752                                                 | 190.0981241                                     | 691.002886                                        | 0.266129032                              |
| 0.008403036                                                 | 347.535                                         | 400                                               | 0.295857988                              |
| 0.012058529                                                 | 215.8435252                                     | 556                                               | 0.251469923                              |
| 0.009871673                                                 | 228.4984227                                     | 951                                               | 0.283457526                              |
| 0.010381131                                                 | 329.0338235                                     | 678.0029412                                       | 0.200058841                              |
| 0.005867908                                                 | 395.6284224                                     | 767                                               | 0.242798354                              |
| 0.005981608                                                 | 367.6181607                                     | 857.0023283                                       | 0.207387735                              |
| 0.005674952                                                 | 339.0744681                                     | 1128                                              | 0.2256                                   |
| 0.005791155                                                 | 600.6773504                                     | 468                                               | 0.184907151                              |
| 0.022644469                                                 | 180.1102362                                     | 127                                               | 0.264033264                              |
| 0.022207394                                                 | 149.6495327                                     | 214                                               | 0.240990991                              |
| 0.00925921                                                  | 239.916996                                      | 506                                               | 0.1572894                                |
| 0.005424767                                                 | 456.1741573                                     | 888.0022472                                       | 0.249369571                              |
| 0.009397076                                                 | 262.2852234                                     | 582                                               | 0.171630787                              |
| 0.017901081                                                 | 194.0110497                                     | 181                                               | 0.121967655                              |
| 0.022698558                                                 | 155.4115646                                     | 294                                               | 0.179706601                              |
| 0.021658849                                                 | 143.5748299                                     | 294                                               | 0.223404255                              |
| 0.01366774                                                  | 175.0655271                                     | 351                                               | 0.181677019                              |
| 0.012297729                                                 | 272.308094                                      | 383                                               | 0.126527915                              |
| 0.018985022                                                 | 189.6747967                                     | 369                                               | 0.195859873                              |
| 0.006647716                                                 | 389.0325407                                     | 799                                               | 0.228677733                              |
| 0.014656617                                                 | 177.8909884                                     | 688                                               | 0.192447552                              |
| 0.006015842                                                 | 403.9295302                                     | 884.0559284                                       | 0.242539338                              |
| 0.016639425                                                 | 251.6641509                                     | 265                                               | 0.174802111                              |
| 0.034507632                                                 | 90.95762712                                     | 118                                               | 0.209219858                              |
| 0.012451777                                                 | 239.2833333                                     | 240                                               | 0.220183486                              |
| 0.007182711                                                 | 352.6176471                                     | 612                                               | 0.153614458                              |
| 0.012915508                                                 | 265.7355769                                     | 208                                               | 0.106339468                              |
| 0.008776037                                                 | 260.5927835                                     | 582                                               | 0.153278904                              |
| 0.007157743                                                 | 406.0378788                                     | 264                                               | 0.225448335                              |
| 0.007037426                                                 | 292.8026608                                     | 902                                               | 0.229108458                              |
| 0.008345764                                                 | 338.4894515                                     | 474                                               | 0.251059322                              |
| 0.006423555                                                 | 483.3855279                                     | 837.0213523                                       | 0.257090576                              |
| 0.011630851                                                 | 234.7247956                                     | 367                                               | 0.150904605                              |
| 0.011274464                                                 | 253.6                                           | 305                                               | 0.222303207                              |
| 0.020619763                                                 | 122.1768293                                     | 164                                               | 0.116725979                              |
| 0.009084028                                                 | 244.7487179                                     | 585                                               | 0.198911935                              |
| 0.005572739                                                 | 421.8670635                                     | 1008                                              | 0.183706944                              |
| 0.008128679                                                 | 305.6966068                                     | 501                                               | 0.220607662                              |
| 0.013448258                                                 | 185.8574423                                     | 477                                               | 0.255353319                              |
| 0.015645889                                                 | 176.6630435                                     | 184                                               | 0.311864407                              |
| 0.011968611                                                 | 210.2624672                                     | 381                                               | 0.246921581                              |
| 0.015351662                                                 | 230.9910714                                     | 224                                               | 0.211720227                              |
| 0.01129062                                                  | 241.3225806                                     | 713                                               | 0.199943915                              |
| 0.013843472                                                 | 197.0542986                                     | 221                                               | 0.17092034                               |
| 0.006056                                                    | 409.6189624                                     | 559                                               | 0.222975668                              |
| 0.008039434                                                 | 365.1089799                                     | 1147                                              | 0.301207983                              |
| 0.011520546                                                 | 242.8266254                                     | 323                                               | 0.156720039                              |
| 0.005164681                                                 | 382.1743389                                     | 1021                                              | 0.218209019                              |
| 0.00543981                                                  | 329.0751819                                     | 1237                                              | 0.189986177                              |
| 0.006320235                                                 | 391.3731778                                     | 1029                                              | 0.241435946                              |
| 0.00851644                                                  | 322.6593807                                     | 549                                               | 0.235521236                              |
| 0.011942113                                                 | 227.184492                                      | 374                                               | 0.15881104                               |
| 0.01214306                                                  | 239.5944056                                     | 286                                               | 0.210448859                              |
| 0.006923387                                                 | 311.6443452                                     | 672                                               | 0.205128205                              |
| 0.006323864                                                 | 344.4597049                                     | 881                                               | 0.19784415                               |
| 0.005563927                                                 | 699.9213836                                     | 318                                               | 0.233480176                              |
| 0.00607169                                                  | 400.9299451                                     | 728                                               | 0.273993225                              |
| 0.006019902                                                 | 417.9468268                                     | 583                                               | 0.235650768                              |
| 0.030661376                                                 | 92.79761905                                     | 84                                                | 0.160611855                              |
| 0.008041436                                                 | 334.7733333                                     | 898.0022222                                       | 0.233039876                              |
| 0.020659834                                                 | 143.7601958                                     | 613                                               | 0.176453656                              |
| 0.008187318                                                 | 345.3274559                                     | 397                                               | 0.278011204                              |
| 0.016354248                                                 | 168.7452632                                     | 475                                               | 0.156095958                              |
| 0.041232992                                                 | 61.41304348                                     | 92                                                | 0.223844282                              |
| 0.026395958                                                 | 134.9264706                                     | 136                                               | 0.235294118                              |
| 0.005957524                                                 | 329.0877458                                     | 661                                               | 0.205854874                              |
| 0.024964212                                                 | 206.7900356                                     | 281                                               | 0.254298643                              |
| 0.013436066                                                 | 190.5590062                                     | 322                                               | 0.206145967                              |
| 0.005685525                                                 | 373.9157143                                     | 700                                               | 0.160808638                              |
| 0.01427549                                                  | 180.9420804                                     | 846                                               | 0.179770506                              |
| 0.010807359                                                 | 484.0798969                                     | 388                                               | 0.438914027                              |
| 0.01173882                                                  | 223.1685393                                     | 267                                               | 0.151446398                              |
| 0.040764204                                                 | 107.3047619                                     | 105                                               | 0.245327103                              |
| 0.030532859                                                 | 102.8175182                                     | 137                                               | 0.154279279                              |
| 0.013148787                                                 | 322.6485356                                     | 478                                               | 0.414211438                              |

| log.sigma.4.5.mm.3D_gldzm_IntensityVariabilityNormalized | log.sigma.4.5.mm.3D_gldzm_LowIntensitySmallDistanceEmphasis | log.sigma.4.5.mm.3D_gldzm_IntensityVariability |
|----------------------------------------------------------|-------------------------------------------------------------|------------------------------------------------|
| 0.054057843                                              | 0.01315124                                                  | 17.08227848                                    |
| 0.060612081                                              | 0.008205934                                                 | 23.94177215                                    |
| 0.058942732                                              | 0.012784987                                                 | 18.33118971                                    |
| 0.060105184                                              | 0.018284301                                                 | 29.09090909                                    |
| 0.066993258                                              | 0.019413109                                                 | 13.33165829                                    |
| 0.063801991                                              | 0.023048228                                                 | 15.18487395                                    |
| 0.098724048                                              | 0.029027725                                                 | 13.42647059                                    |
| 0.052873903                                              | 0.009347828                                                 | 20.40932642                                    |
| 0.058374669                                              | 0.01116534                                                  | 29.47920792                                    |
| 0.052348735                                              | 0.003699563                                                 | 40.25617685                                    |
| 0.074918998                                              | 0.021971473                                                 | 15.95774648                                    |
| 0.057911614                                              | 0.00958809                                                  | 25.13364055                                    |
| 0.059912802                                              | 0.012082962                                                 | 26.06206897                                    |
| 0.066339556                                              | 0.028350768                                                 | 24.87733333                                    |
| 0.050777226                                              | 0.010954052                                                 | 21.22488038                                    |
| 0.049752001                                              | 0.006491627                                                 | 46.6673774                                     |
| 0.050648681                                              | 0.009347412                                                 | 17.98028169                                    |
| 0.060883143                                              | 0.008140818                                                 | 27.2147651                                     |
| 0.069160559                                              | 0.008990629                                                 | 19.57243816                                    |
| 0.057968398                                              | 0.013299463                                                 | 30.20153551                                    |
| 0.056383083                                              | 0.005715207                                                 | 81.81185389                                    |
| 0.055555556                                              | 0.007443967                                                 | 25.66666667                                    |
| 0.053042548                                              | 0.007019113                                                 | 49.17044229                                    |
| 0.060725538                                              | 0.020068918                                                 | 14.63485477                                    |
| 0.057384815                                              | 0.015209144                                                 | 39.76767677                                    |
| 0.0480875                                                | 0.008403036                                                 | 19.235                                         |
| 0.057372807                                              | 0.012058529                                                 | 31.89928058                                    |
| 0.059543278                                              | 0.009871673                                                 | 56.6256572                                     |
| 0.050860727                                              | 0.010313048                                                 | 34.58529412                                    |
| 0.048777047                                              | 0.005867908                                                 | 37.41199478                                    |
| 0.052042267                                              | 0.00597515                                                  | 44.70430733                                    |
| 0.056352485                                              | 0.005674952                                                 | 63.56560284                                    |
| 0.049127036                                              | 0.005791155                                                 | 22.99145299                                    |
| 0.061194122                                              | 0.022644469                                                 | 7.771653543                                    |
| 0.06157743                                               | 0.022207394                                                 | 13.17757009                                    |
| 0.060233717                                              | 0.00925921                                                  | 30.47826087                                    |
| 0.044842823                                              | 0.005418987                                                 | 39.91011236                                    |
| 0.060544868                                              | 0.009397076                                                 | 35.2371134                                     |
| 0.061506059                                              | 0.017901081                                                 | 11.13259669                                    |
| 0.063654033                                              | 0.022698558                                                 | 18.71428571                                    |
| 0.068142903                                              | 0.021658849                                                 | 20.03401361                                    |
| 0.068936129                                              | 0.01366774                                                  | 24.1965812                                     |
| 0.064142506                                              | 0.012297729                                                 | 24.56657963                                    |
| 0.05563267                                               | 0.018985022                                                 | 20.52845528                                    |
| 0.045164403                                              | 0.006647716                                                 | 36.08635795                                    |
| 0.061963392                                              | 0.014656617                                                 | 42.63081395                                    |
| 0.052287434                                              | 0.005476651                                                 | 46.74496644                                    |
| 0.054353863                                              | 0.016639425                                                 | 14.40377358                                    |
| 0.090922149                                              | 0.034507632                                                 | 10.72881356                                    |
| 0.0575                                                   | 0.012451777                                                 | 13.8                                           |
| 0.053184673                                              | 0.007182711                                                 | 32.54901961                                    |
| 0.059356509                                              | 0.012915508                                                 | 12.34615385                                    |
| 0.060025271                                              | 0.008776037                                                 | 34.9347079                                     |
| 0.062213039                                              | 0.007157743                                                 | 16.42424242                                    |
| 0.054881736                                              | 0.007037426                                                 | 49.50332594                                    |
| 0.047819972                                              | 0.008345764                                                 | 22.66666667                                    |
| 0.049795328                                              | 0.006398603                                                 | 41.97746145                                    |
| 0.060264758                                              | 0.011630851                                                 | 22.11716621                                    |
| 0.061306101                                              | 0.011274464                                                 | 18.69836066                                    |
| 0.080160619                                              | 0.020619763                                                 | 13.14634146                                    |
| 0.060594638                                              | 0.009084028                                                 | 35.44786325                                    |
| 0.050906242                                              | 0.005572739                                                 | 51.31349206                                    |
| 0.059326457                                              | 0.008128679                                                 | 29.72255489                                    |
| 0.061798716                                              | 0.013448258                                                 | 29.47798742                                    |
| 0.066280718                                              | 0.015645889                                                 | 12.19565217                                    |
| 0.060326121                                              | 0.011968611                                                 | 22.98425197                                    |
| 0.056760204                                              | 0.015351662                                                 | 12.71428571                                    |
| 0.053510344                                              | 0.01129062                                                  | 38.15287518                                    |
| 0.071517782                                              | 0.013843472                                                 | 15.80542986                                    |
| 0.050572675                                              | 0.006056                                                    | 28.27012522                                    |
| 0.046180134                                              | 0.008039434                                                 | 52.96861378                                    |
| 0.06041465                                               | 0.011520546                                                 | 19.51393189                                    |
| 0.056307263                                              | 0.005164681                                                 | 57.48971596                                    |
| 0.061137691                                              | 0.00543981                                                  | 75.62732417                                    |
| 0.048395368                                              | 0.006320235                                                 | 49.79883382                                    |
| 0.050998504                                              | 0.00851644                                                  | 27.99817851                                    |
| 0.059981698                                              | 0.011942113                                                 | 22.43315508                                    |
| 0.063523889                                              | 0.01214306                                                  | 18.16783217                                    |
| 0.056888641                                              | 0.006923387                                                 | 38.22916667                                    |
| 0.050256326                                              | 0.006323864                                                 | 44.27582293                                    |
| 0.044638266                                              | 0.005563927                                                 | 14.19496855                                    |
| 0.047888238                                              | 0.00607169                                                  | 34.86263736                                    |
| 0.051755132                                              | 0.006019902                                                 | 30.17324185                                    |
| 0.094671202                                              | 0.030661376                                                 | 7.952380952                                    |
| 0.05522716                                               | 0.007989996                                                 | 49.70444444                                    |
| 0.061950294                                              | 0.020659834                                                 | 37.97553018                                    |
| 0.049051767                                              | 0.008187318                                                 | 19.47355164                                    |
| 0.065945706                                              | 0.016354248                                                 | 31.32421053                                    |
| 0.113185255                                              | 0.041232992                                                 | 10.41304348                                    |
| 0.067041522                                              | 0.026395958                                                 | 9.117647059                                    |
| 0.059930743                                              | 0.005957524                                                 | 39.61422088                                    |
| 0.05563506                                               | 0.024964212                                                 | 15.63345196                                    |
| 0.065911809                                              | 0.013436066                                                 | 21.22360248                                    |
| 0.052130612                                              | 0.005685525                                                 | 36.49142857                                    |
| 0.063589468                                              | 0.01427549                                                  | 53.79669031                                    |
| 0.038354235                                              | 0.010807359                                                 | 14.8814433                                     |
| 0.07012302                                               | 0.01173882                                                  | 18.72284644                                    |
| 0.079002268                                              | 0.040764204                                                 | 8.295238095                                    |
| 0.071767276                                              | 0.030532859                                                 | 9.832116788                                    |
| 0.044677089                                              | 0.013148787                                                 | 21.35564854                                    |

| log.sigma.4.5.mm.3D_gldzm_HighIntensityLargeDistanceEmphasis | log.sigma.4.5.mm.3D_gldzm_SmallDistanceEmphasis | log.sigma.4.5.mm.3D_glcm_SumVariance | log.sigma.4.5.mm.3D_glcm_Homogeneity1 |
|--------------------------------------------------------------|-------------------------------------------------|--------------------------------------|---------------------------------------|
| 260.1487342                                                  | 1                                               | 672.8770317                          | 0.425482167                           |
| 324.8303797                                                  | 1                                               | 943.1083614                          | 0.450680909                           |
| 215.2508039                                                  | 1                                               | 663.8812722                          | 0.420498879                           |
| 160.0785124                                                  | 1                                               | 373.5800154                          | 0.464293929                           |
| 167.6030151                                                  | 1                                               | 342.8079292                          | 0.506025594                           |
| 143.1890756                                                  | 1                                               | 318.2517083                          | 0.493386114                           |
| 102.3897059                                                  | 1                                               | 167.6789523                          | 0.575684471                           |
| 328.1917098                                                  | 1                                               | 933.7974348                          | 0.460184317                           |
| 220.4772277                                                  | 1                                               | 626.3679806                          | 0.449311462                           |
| 591.0091027                                                  | 1                                               | 1930.755955                          | 0.421705322                           |
| 124.7042254                                                  | 1                                               | 313.2424399                          | 0.522270544                           |
| 255.3456221                                                  | 1                                               | 759.5958462                          | 0.425163085                           |
| 200.7103448                                                  | 1                                               | 480.400143                           | 0.528356197                           |
| 126.9573333                                                  | 1                                               | 328.4752403                          | 0.446343459                           |
| 257.7559809                                                  | 1                                               | 753.2869844                          | 0.427277675                           |
| 369.3113006                                                  | 0.999200426                                     | 1080.674645                          | 0.459711633                           |
| 352.3887324                                                  | 1                                               | 1169.732803                          | 0.445260225                           |
| 285.0693512                                                  | 1                                               | 768.9088671                          | 0.487937142                           |
| 271.8339223                                                  | 1                                               | 810.4156239                          | 0.437848036                           |
| 233.1401152                                                  | 1                                               | 641.5673438                          | 0.475404025                           |
| 342.2556857                                                  | 0.99896623                                      | 1106.693233                          | 0.445161377                           |
| 320.6277056                                                  | 1                                               | 928.5428466                          | 0.451628554                           |
| 312.5264293                                                  | 1                                               | 893.127062                           | 0.439578481                           |
| 209.6224066                                                  | 1                                               | 496.6655795                          | 0.445938374                           |
| 190.9466089                                                  | 0.998917749                                     | 553.3561052                          | 0.417761702                           |
| 347.535                                                      | 1                                               | 990.6052834                          | 0.409270289                           |
| 215.8435252                                                  | 1                                               | 676.5057255                          | 0.465559983                           |
| 228.4984227                                                  | 1                                               | 749.7128536                          | 0.406010906                           |
| 329.3911765                                                  | 0.998897059                                     | 1073.751865                          | 0.446076038                           |
| 395.6284224                                                  | 1                                               | 1323.279134                          | 0.444631112                           |
| 369.9790454                                                  | 0.999126892                                     | 1211.09569                           | 0.450744349                           |
| 339.0744681                                                  | 1                                               | 1034.915886                          | 0.446545101                           |
| 600.6773504                                                  | 1                                               | 1857.831012                          | 0.468792255                           |
| 180.1102362                                                  | 1                                               | 462.2701627                          | 0.456103491                           |
| 149.6495327                                                  | 1                                               | 417.5715668                          | 0.454847674                           |
| 239.916996                                                   | 1                                               | 703.1420944                          | 0.475337263                           |
| 458.6314607                                                  | 0.999157303                                     | 1473.466704                          | 0.408386777                           |
| 262.2852234                                                  | 1                                               | 814.4442339                          | 0.472055744                           |
| 194.0110497                                                  | 1                                               | 507.1384056                          | 0.540582029                           |
| 155.4115646                                                  | 1                                               | 314.1488964                          | 0.49837521                            |
| 143.5748299                                                  | 1                                               | 395.579663                           | 0.454343508                           |
| 175.0655271                                                  | 1                                               | 415.7183239                          | 0.480654556                           |
| 272.308094                                                   | 1                                               | 819.2139341                          | 0.497795433                           |
| 189.6747967                                                  | 1                                               | 412.259373                           | 0.491278533                           |
| 389.0325407                                                  | 1                                               | 1311.505508                          | 0.432186095                           |
| 177.8909884                                                  | 1                                               | 502.2136659                          | 0.453019334                           |
| 408.2281879                                                  | 0.995805369                                     | 1189.08882                           | 0.440406158                           |
| 251.6641509                                                  | 1                                               | 890.3192231                          | 0.478248746                           |
| 90.95762712                                                  | 1                                               | 179.8961449                          | 0.491368918                           |
| 239.2833333                                                  | 1                                               | 534.9781819                          | 0.487665456                           |
| 352.6176471                                                  | 1                                               | 1042.527579                          | 0.502191628                           |
| 265.7355769                                                  | 1                                               | 784.9199754                          | 0.542196419                           |
| 260.5927835                                                  | 1                                               | 621.1387647                          | 0.49127428                            |
| 406.0378788                                                  | 1                                               | 1377.0921                            | 0.435779737                           |
| 292.8026608                                                  | 1                                               | 886.6477517                          | 0.4282229                             |
| 338.4894515                                                  | 1                                               | 942.8703649                          | 0.413187632                           |
| 489.4673784                                                  | 0.997330961                                     | 1552.559526                          | 0.430142213                           |
| 234.7247956                                                  | 1                                               | 517.8007914                          | 0.537729336                           |
| 253.6                                                        | 1                                               | 761.286478                           | 0.446825552                           |
| 122.1768293                                                  | 1                                               | 379.0684349                          | 0.519928065                           |
| 244.7487179                                                  | 1                                               | 697.5064595                          | 0.488566198                           |
| 421.8670635                                                  | 1                                               | 1349.75869                           | 0.464386125                           |
| 305.6966068                                                  | 1                                               | 900.4487313                          | 0.455881229                           |
| 185.8574423                                                  | 1                                               | 623.6857917                          | 0.402250859                           |
| 176.6630435                                                  | 1                                               | 590.6332861                          | 0.410827921                           |
| 210.2624672                                                  | 1                                               | 437.1683767                          | 0.43067941                            |
| 230.9910714                                                  | 1                                               | 449.5097847                          | 0.480658148                           |
| 241.3225806                                                  | 1                                               | 648.1354106                          | 0.446397521                           |
| 197.0542986                                                  | 1                                               | 627.2292165                          | 0.476563997                           |
| 409.6189624                                                  | 1                                               | 1204.078997                          | 0.441126685                           |
| 365.1089799                                                  | 1                                               | 1165.114765                          | 0.388866716                           |
| 242.8266254                                                  | 1                                               | 629.3463024                          | 0.488517057                           |
| 382.1743389                                                  | 1                                               | 1116.734537                          | 0.453878489                           |
| 329.0751819                                                  | 1                                               | 1122.195772                          | 0.446485964                           |
| 391.3731778                                                  | 1                                               | 1056.24763                           | 0.431831667                           |
| 322.6593807                                                  | 1                                               | 968.7074505                          | 0.432494722                           |
| 227.184492                                                   | 1                                               | 748.8195201                          | 0.501222333                           |
| 239.5944056                                                  | 1                                               | 706.2805208                          | 0.449520235                           |
| 311.6443452                                                  | 1                                               | 1015.204524                          | 0.436115365                           |
| 344.4597049                                                  | 1                                               | 1143.41889                           | 0.460137111                           |
| 699.9213836                                                  | 1                                               | 2378.506111                          | 0.43706279                            |
| 400.9299451                                                  | 1                                               | 1286.04981                           | 0.405982794                           |
| 417.9468268                                                  | 1                                               | 1207.471487                          | 0.425798465                           |
| 92.79761905                                                  | 1                                               | 213.9113373                          | 0.557987244                           |
| 335.0433333                                                  | 0.999166667                                     | 1044.853311                          | 0.43625972                            |
| 143.7601958                                                  | 1                                               | 349.1524245                          | 0.487374478                           |
| 345.3274559                                                  | 1                                               | 1011.388331                          | 0.422643375                           |
| 168.7452632                                                  | 1                                               | 418.4669292                          | 0.478500379                           |
| 61.41304348                                                  | 1                                               | 185.7859477                          | 0.460672724                           |
| 134.9264706                                                  | 1                                               | 368.7874989                          | 0.453351529                           |
| 329.0877458                                                  | 1                                               | 918.4142521                          | 0.450702437                           |
| 206.7900356                                                  | 1                                               | 593.5864711                          | 0.426402827                           |
| 190.5590062                                                  | 1                                               | 608.144506                           | 0.454924268                           |
| 373.9157143                                                  | 1                                               | 1135.401841                          | 0.480280668                           |
| 180.9420804                                                  | 1                                               | 481.9881332                          | 0.477358425                           |
| 484.0798969                                                  | 1                                               | 1687.94219                           | 0.3106493                             |
| 223.1685393                                                  | 1                                               | 600.1000427                          | 0.51077995                            |
| 107.3047619                                                  | 1                                               | 227.8198065                          | 0.466274346                           |
| 102.8175182                                                  | 1                                               | 214.2727196                          | 0.539918425                           |
| 322.6485356                                                  | 1                                               | 1035.079584                          | 0.343266707                           |

| log.sigma.4.5.mm.3D_glc_m_Homogeneity2 | log.sigma.4.5.mm.3D_glc_m_ClusterShade | log.sigma.4.5.mm.3D_glc_m_MaximumProbability | log.sigma.4.5.mm.3D_glc_m_Idmn | log.sigma.4.5.mm.3D_glc_m_SumVariance2 |
|----------------------------------------|----------------------------------------|----------------------------------------------|--------------------------------|----------------------------------------|
| 0.35087838                             | 86.33946848                            | 0.026804241                                  | 0.984761927                    | 95.19140018                            |
| 0.37902807                             | 67.90981496                            | 0.03084376                                   | 0.990938856                    | 60.4263782                             |
| 0.343024353                            | -126.3052351                           | 0.025756116                                  | 0.987765429                    | 64.56830277                            |
| 0.394466749                            | 212.0249015                            | 0.029797875                                  | 0.989234162                    | 57.5561921                             |
| 0.448107356                            | 246.1952256                            | 0.062152825                                  | 0.985037185                    | 59.26720126                            |
| 0.430708126                            | 271.046608                             | 0.047711531                                  | 0.988581026                    | 50.244941                              |
| 0.530539136                            | 203.6690885                            | 0.098856841                                  | 0.987069568                    | 45.64312659                            |
| 0.390988468                            | 125.9674191                            | 0.027020249                                  | 0.991976688                    | 77.84043351                            |
| 0.377901821                            | 225.1152716                            | 0.033219357                                  | 0.988093238                    | 71.25802403                            |
| 0.342708289                            | -171.0251637                           | 0.021039829                                  | 0.993155822                    | 79.82865879                            |
| 0.467649983                            | 107.3543113                            | 0.048149108                                  | 0.988280563                    | 36.18225857                            |
| 0.346138629                            | -57.04154961                           | 0.022425376                                  | 0.988735993                    | 55.18935915                            |
| 0.473115036                            | 138.1790403                            | 0.059532921                                  | 0.992210023                    | 38.78860821                            |
| 0.371594151                            | -11.77549092                           | 0.028810218                                  | 0.983837782                    | 47.69087515                            |
| 0.354033595                            | 517.7674831                            | 0.025390414                                  | 0.985327613                    | 84.08200524                            |
| 0.388677686                            | -101.4812406                           | 0.064226612                                  | 0.990689574                    | 80.41048436                            |
| 0.372240778                            | -168.1986413                           | 0.032207757                                  | 0.991434279                    | 60.31288991                            |
| 0.425598113                            | 178.092559                             | 0.033371166                                  | 0.992337867                    | 63.95884467                            |
| 0.363286993                            | -61.85014747                           | 0.022502771                                  | 0.986806561                    | 44.13510161                            |
| 0.409359133                            | -56.72622339                           | 0.036269593                                  | 0.990179552                    | 63.02375101                            |
| 0.372452144                            | -148.2703349                           | 0.022487563                                  | 0.992956855                    | 60.6759015                             |
| 0.379176629                            | 66.4624917                             | 0.025097601                                  | 0.993598667                    | 66.46934636                            |
| 0.363877977                            | 173.4384306                            | 0.026209741                                  | 0.992116092                    | 68.83831045                            |
| 0.372938778                            | 22.49588997                            | 0.038080712                                  | 0.984676573                    | 74.77836344                            |
| 0.338510624                            | -293.4420149                           | 0.02145637                                   | 0.98442412                     | 77.67317279                            |
| 0.329292795                            | 163.001763                             | 0.022678676                                  | 0.987874669                    | 79.21929766                            |
| 0.396059726                            | 140.0166375                            | 0.021941158                                  | 0.990349904                    | 66.43345849                            |
| 0.323253304                            | -221.5217218                           | 0.018530921                                  | 0.986639419                    | 65.67301959                            |
| 0.373259976                            | -229.8501842                           | 0.028014629                                  | 0.99079392                     | 54.44658858                            |
| 0.372983299                            | -42.57584692                           | 0.028395211                                  | 0.993319609                    | 56.87817232                            |
| 0.379357176                            | -223.8719223                           | 0.02488922                                   | 0.991347306                    | 70.76319044                            |
| 0.373711497                            | -70.66324629                           | 0.022648191                                  | 0.991645974                    | 63.95220491                            |
| 0.401426679                            | -348.3611603                           | 0.032604414                                  | 0.994097828                    | 79.76134209                            |
| 0.386833858                            | 111.6781782                            | 0.051398876                                  | 0.979870366                    | 60.9630272                             |
| 0.385003123                            | -3.761829415                           | 0.041694987                                  | 0.982034328                    | 54.56100833                            |
| 0.408814473                            | 77.54485794                            | 0.035047468                                  | 0.990111086                    | 44.45318973                            |
| 0.327825733                            | -0.057285328                           | 0.0177541                                    | 0.991875898                    | 93.17797274                            |
| 0.4038425                              | -49.82628265                           | 0.03367229                                   | 0.990968718                    | 46.62967161                            |
| 0.489153015                            | 116.9458475                            | 0.060273026                                  | 0.992622417                    | 35.9339809                             |
| 0.436486549                            | 254.1582712                            | 0.047250596                                  | 0.987985311                    | 56.96499274                            |
| 0.382142348                            | 45.6655552                             | 0.035746634                                  | 0.983237245                    | 39.65711369                            |
| 0.414730261                            | 114.8436355                            | 0.040996504                                  | 0.987505455                    | 41.89577179                            |
| 0.436500334                            | 128.7459988                            | 0.039262876                                  | 0.991879291                    | 47.77933485                            |
| 0.429655614                            | 253.3603885                            | 0.049971418                                  | 0.986082805                    | 55.30903348                            |
| 0.361180416                            | -340.614706                            | 0.037011826                                  | 0.987684513                    | 84.81762355                            |
| 0.379843432                            | -48.24786541                           | 0.018606973                                  | 0.989884818                    | 66.49408409                            |
| 0.366621212                            | -117.366186                            | 0.025760311                                  | 0.992108267                    | 71.52410911                            |
| 0.414866044                            | -387.1535425                           | 0.04102436                                   | 0.989176661                    | 54.83545937                            |
| 0.429493735                            | 107.3831581                            | 0.060126444                                  | 0.976234259                    | 48.8078761                             |
| 0.425513398                            | 318.957324                             | 0.050713593                                  | 0.989661475                    | 63.23062935                            |
| 0.443203217                            | 145.5909164                            | 0.042590947                                  | 0.993640192                    | 54.28382637                            |
| 0.492981772                            | 25.62937638                            | 0.061601743                                  | 0.992486367                    | 33.27211973                            |
| 0.429295755                            | 261.9454129                            | 0.036559576                                  | 0.992544555                    | 63.2020243                             |
| 0.360174911                            | 66.09574571                            | 0.022785745                                  | 0.989041646                    | 53.21807142                            |
| 0.350175135                            | -40.88152113                           | 0.019563224                                  | 0.988807364                    | 65.41484679                            |
| 0.334227376                            | -3.343396371                           | 0.019537912                                  | 0.988954182                    | 84.18920848                            |
| 0.355241889                            | -189.5587723                           | 0.025045701                                  | 0.99102393                     | 76.34608149                            |
| 0.486533595                            | 416.8140195                            | 0.079541119                                  | 0.991661051                    | 58.45240102                            |
| 0.373168824                            | 18.61488149                            | 0.029717295                                  | 0.988005208                    | 52.2058591                             |
| 0.462934961                            | -21.66108332                           | 0.051028266                                  | 0.987747586                    | 24.30641075                            |
| 0.425618877                            | 132.6351178                            | 0.034747611                                  | 0.989803005                    | 72.22482166                            |
| 0.396385195                            | -94.20027985                           | 0.029857061                                  | 0.994177464                    | 62.19890758                            |
| 0.385109656                            | -94.87405395                           | 0.028474373                                  | 0.990489213                    | 57.71713516                            |
| 0.317588618                            | -130.2191078                           | 0.018154221                                  | 0.980993818                    | 59.52808468                            |
| 0.330722976                            | -39.62427982                           | 0.029983897                                  | 0.978794392                    | 46.87312915                            |
| 0.355487604                            | 404.1096094                            | 0.026122073                                  | 0.986180405                    | 77.08899059                            |
| 0.417118953                            | 577.0224338                            | 0.042242369                                  | 0.989235605                    | 87.29291064                            |
| 0.374343919                            | 248.1419371                            | 0.020898051                                  | 0.987921346                    | 81.75981371                            |
| 0.410040251                            | -7.470747264                           | 0.029677702                                  | 0.987500134                    | 47.08510642                            |
| 0.366957272                            | 26.55715805                            | 0.028348993                                  | 0.992239949                    | 73.5502438                             |
| 0.306209196                            | -700.5677812                           | 0.0138436                                    | 0.987370651                    | 111.9732342                            |
| 0.426550551                            | 237.2700279                            | 0.04325393                                   | 0.989554442                    | 47.41162287                            |
| 0.382558906                            | -129.5483389                           | 0.027569724                                  | 0.992432806                    | 71.33269489                            |
| 0.373137939                            | -192.2333929                           | 0.026539275                                  | 0.992195403                    | 51.43415294                            |
| 0.356414954                            | 170.6973487                            | 0.021574679                                  | 0.9936482                      | 88.82912133                            |
| 0.358500703                            | -80.55428733                           | 0.027581259                                  | 0.99157379                     | 74.32935188                            |
| 0.44196452                             | -61.10535322                           | 0.036831475                                  | 0.99189498                     | 43.42796443                            |
| 0.377736209                            | -41.91706229                           | 0.030132739                                  | 0.986182241                    | 55.98258902                            |
| 0.361491114                            | -149.4165637                           | 0.025676393                                  | 0.990004664                    | 55.47043733                            |
| 0.390525432                            | -254.5296044                           | 0.033807466                                  | 0.991917431                    | 61.36483902                            |
| 0.367371469                            | -387.5140124                           | 0.034705272                                  | 0.991650791                    | 76.65478099                            |
| 0.32584122                             | -199.5442803                           | 0.021254529                                  | 0.990236772                    | 83.11840364                            |
| 0.348043609                            | 208.9973777                            | 0.026046905                                  | 0.992350872                    | 67.77890919                            |
| 0.509825474                            | 65.41000389                            | 0.095348931                                  | 0.981329255                    | 28.09728183                            |
| 0.360100337                            | -263.3363234                           | 0.019683127                                  | 0.991068377                    | 71.55983987                            |
| 0.423609339                            | 235.2423382                            | 0.026970208                                  | 0.989493246                    | 63.28489596                            |
| 0.346542417                            | -47.78239599                           | 0.034822229                                  | 0.989245721                    | 83.32988721                            |
| 0.411805837                            | 83.00161549                            | 0.032002873                                  | 0.988440753                    | 46.9325962                             |
| 0.389728788                            | -19.01158756                           | 0.0587017                                    | 0.965021311                    | 20.59626754                            |
| 0.380742883                            | -7.716810989                           | 0.039972464                                  | 0.982647078                    | 53.31553166                            |
| 0.379719474                            | 181.1208278                            | 0.025590448                                  | 0.991080963                    | 58.07319636                            |
| 0.347877377                            | 59.66467729                            | 0.026994593                                  | 0.985238778                    | 61.88805675                            |
| 0.382352918                            | -117.8882429                           | 0.030931607                                  | 0.987640853                    | 44.43772397                            |
| 0.414277164                            | -21.70030287                           | 0.034783831                                  | 0.993372075                    | 52.8841313                             |
| 0.410921964                            | -0.81378093                            | 0.027999456                                  | 0.989804639                    | 46.93486469                            |
| 0.22062498                             | -1049.90191                            | 0.016547308                                  | 0.980076604                    | 165.1343291                            |
| 0.452299637                            | 92.29767873                            | 0.048186758                                  | 0.99131657                     | 37.87942461                            |
| 0.396322979                            | 65.63325983                            | 0.050800757                                  | 0.980521995                    | 52.45617401                            |
| 0.486505283                            | 116.4483228                            | 0.076208977                                  | 0.986200396                    | 35.45182049                            |
| 0.25163481                             | -222.3330465                           | 0.0173529                                    | 0.984061072                    | 124.3464542                            |

| log.sigma.4.5.mm.3D_glc_m_Contrast | log.sigma.4.5.mm.3D_glc_m_DifferenceEntropy | log.sigma.4.5.mm.3D_glc_m_InverseVariance | log.sigma.4.5.mm.3D_glc_m_Entropy | log.sigma.4.5.mm.3D_glc_m_Dissimilarity |
|------------------------------------|---------------------------------------------|-------------------------------------------|-----------------------------------|-----------------------------------------|
| 12.88711981                        | 2.915248979                                 | 0.346351399                               | 7.632729986                       | 2.572468077                             |
| 8.475163995                        | 2.678104913                                 | 0.374418969                               | 7.208055094                       | 2.157499853                             |
| 10.7540954                         | 2.837067857                                 | 0.343814016                               | 7.385563575                       | 2.474617412                             |
| 7.05247855                         | 2.562616892                                 | 0.387637179                               | 7.162083166                       | 1.982398174                             |
| 7.170942744                        | 2.506426003                                 | 0.404268035                               | 6.582973336                       | 1.847980248                             |
| 5.830136267                        | 2.433856785                                 | 0.411789382                               | 6.723318928                       | 1.768873124                             |
| 3.96854717                         | 2.154460098                                 | 0.417910539                               | 5.824351455                       | 1.36990439                              |
| 8.578719781                        | 2.662367575                                 | 0.382957556                               | 7.35805425                        | 2.108550884                             |
| 9.922813074                        | 2.765269551                                 | 0.365555965                               | 7.405658006                       | 2.261879622                             |
| 10.14889901                        | 2.808692138                                 | 0.340955239                               | 7.698504768                       | 2.414178486                             |
| 4.939496083                        | 2.335603401                                 | 0.432592135                               | 6.497293484                       | 1.600967639                             |
| 9.90555232                         | 2.773879461                                 | 0.341592217                               | 7.367447565                       | 2.373752144                             |
| 5.058089364                        | 2.369990347                                 | 0.414283622                               | 6.595691319                       | 1.600447964                             |
| 7.55256134                         | 2.611674136                                 | 0.370647347                               | 7.129338047                       | 2.099662013                             |
| 15.25905013                        | 2.969117111                                 | 0.33510555                                | 7.647589717                       | 2.718324765                             |
| 10.58111617                        | 2.8291622                                   | 0.331658803                               | 7.595688155                       | 2.32073961                              |
| 9.129798732                        | 2.70365303                                  | 0.36534683                                | 7.214697823                       | 2.227224203                             |
| 7.658696987                        | 2.585780423                                 | 0.395557975                               | 7.113431493                       | 1.950543478                             |
| 9.476781429                        | 2.707870138                                 | 0.36467306                                | 7.051541629                       | 2.27306197                              |
| 7.488192514                        | 2.60017971                                  | 0.390731144                               | 7.193079188                       | 1.982119358                             |
| 9.410016695                        | 2.75293592                                  | 0.363417194                               | 7.486431035                       | 2.255117737                             |
| 8.524125905                        | 2.674836081                                 | 0.366631673                               | 7.360459799                       | 2.159967917                             |
| 8.860080918                        | 2.720930526                                 | 0.356196506                               | 7.506133708                       | 2.235967068                             |
| 8.56955071                         | 2.645121134                                 | 0.363480513                               | 7.210987943                       | 2.205327588                             |
| 10.26044157                        | 2.811036955                                 | 0.339718624                               | 7.651340952                       | 2.450891099                             |
| 13.05907436                        | 2.955702466                                 | 0.322948299                               | 7.643365971                       | 2.675659305                             |
| 7.357279232                        | 2.577703091                                 | 0.38274517                                | 7.218854075                       | 2.005712382                             |
| 10.96053772                        | 2.858043462                                 | 0.323229158                               | 7.642534023                       | 2.553430956                             |
| 9.232740056                        | 2.702005844                                 | 0.367602768                               | 7.219255456                       | 2.22461538                              |
| 10.51006521                        | 2.792404726                                 | 0.365408434                               | 7.383119186                       | 2.321515941                             |
| 8.673718101                        | 2.68260645                                  | 0.38011894                                | 7.464410581                       | 2.152971595                             |
| 9.463433507                        | 2.742293513                                 | 0.362938058                               | 7.471432504                       | 2.244027702                             |
| 8.362368479                        | 2.630644485                                 | 0.387088511                               | 7.261473623                       | 2.05462147                              |
| 11.91938761                        | 2.778648109                                 | 0.34650721                                | 6.917027243                       | 2.391958499                             |
| 9.370515154                        | 2.714379824                                 | 0.365670699                               | 7.099100882                       | 2.228461632                             |
| 6.989521692                        | 2.555621918                                 | 0.39488162                                | 6.993738017                       | 1.937534573                             |
| 12.15255638                        | 2.91140477                                  | 0.331148157                               | 7.868740586                       | 2.604282355                             |
| 6.83952302                         | 2.556389298                                 | 0.388659471                               | 7.016417733                       | 1.941555131                             |
| 4.397691826                        | 2.24979616                                  | 0.432622036                               | 6.341271139                       | 1.495909052                             |
| 6.746950911                        | 2.514094847                                 | 0.39178163                                | 6.827525332                       | 1.847166543                             |
| 7.916044299                        | 2.635649934                                 | 0.371796745                               | 6.925179877                       | 2.100128302                             |
| 6.99609089                         | 2.556434424                                 | 0.387519672                               | 6.870925321                       | 1.929610889                             |
| 6.175692867                        | 2.473580635                                 | 0.409288366                               | 6.839498507                       | 1.785024969                             |
| 8.834719871                        | 2.614275085                                 | 0.389603645                               | 6.9143411                         | 2.002430591                             |
| 16.15261323                        | 3.013997482                                 | 0.337788789                               | 7.803211553                       | 2.752987758                             |
| 7.093956299                        | 2.581359379                                 | 0.378550106                               | 7.39377825                        | 2.034021458                             |
| 10.01760746                        | 2.788986052                                 | 0.356818251                               | 7.572696377                       | 2.317249844                             |
| 8.988948482                        | 2.678361357                                 | 0.38878777                                | 6.942232867                       | 2.085453241                             |
| 6.745256682                        | 2.410631582                                 | 0.401426432                               | 6.274561835                       | 1.874293743                             |
| 7.997907946                        | 2.59626213                                  | 0.395548276                               | 6.91464024                        | 1.969725049                             |
| 6.34470167                         | 2.467467806                                 | 0.419157722                               | 6.91208653                        | 1.774243033                             |
| 5.351848123                        | 2.32780827                                  | 0.437775478                               | 6.238637783                       | 1.554833393                             |
| 6.530613925                        | 2.498118392                                 | 0.412490165                               | 7.067420876                       | 1.828786302                             |
| 11.43525741                        | 2.750686154                                 | 0.353280077                               | 7.19196836                        | 2.372544026                             |
| 9.8618424                          | 2.773201225                                 | 0.343875635                               | 7.55761321                        | 2.359080842                             |
| 11.83603912                        | 2.889072908                                 | 0.338214852                               | 7.767724487                       | 2.56544269                              |
| 12.22704375                        | 2.878952021                                 | 0.347506317                               | 7.645608924                       | 2.494454562                             |
| 6.918585812                        | 2.479920359                                 | 0.404089707                               | 6.599074085                       | 1.721229022                             |
| 8.482990185                        | 2.690945532                                 | 0.361220099                               | 7.135988245                       | 2.188269689                             |
| 4.170901534                        | 2.241942311                                 | 0.436052367                               | 6.233373867                       | 1.526284155                             |
| 7.880378786                        | 2.620247788                                 | 0.388529376                               | 7.293968734                       | 1.962327032                             |
| 8.676243197                        | 2.667642482                                 | 0.383730798                               | 7.297808758                       | 2.102009172                             |
| 8.941035793                        | 2.697200988                                 | 0.368881282                               | 7.283481016                       | 2.171758701                             |
| 10.68047857                        | 2.824755062                                 | 0.316197971                               | 7.482940651                       | 2.55341374                              |
| 12.19131321                        | 2.846441006                                 | 0.326706588                               | 7.100108257                       | 2.611948298                             |
| 10.73007342                        | 2.808542337                                 | 0.354999615                               | 7.389750382                       | 2.401972069                             |
| 8.321466265                        | 2.630838318                                 | 0.390946262                               | 7.089036529                       | 2.025587485                             |
| 10.10359417                        | 2.764976648                                 | 0.367618643                               | 7.559584502                       | 2.273095471                             |
| 7.024837033                        | 2.519094122                                 | 0.39393938                                | 6.899426842                       | 1.931664241                             |
| 9.267928367                        | 2.742488912                                 | 0.359830839                               | 7.487617271                       | 2.261633655                             |
| 15.30107589                        | 3.067674042                                 | 0.305970451                               | 8.177841724                       | 2.935829039                             |
| 7.625306371                        | 2.519390163                                 | 0.41082134                                | 6.736306644                       | 1.900051773                             |
| 9.066765164                        | 2.721087929                                 | 0.366166659                               | 7.465464241                       | 2.189502216                             |
| 8.260290853                        | 2.665822116                                 | 0.373597139                               | 7.270416983                       | 2.149168074                             |
| 10.47735476                        | 2.807741369                                 | 0.355790135                               | 7.767619984                       | 2.373828032                             |
| 11.34976228                        | 2.856434258                                 | 0.35226343                                | 7.563797175                       | 2.447816476                             |
| 6.636485965                        | 2.498383838                                 | 0.411659309                               | 6.806184496                       | 1.812936073                             |
| 9.174137892                        | 2.692845844                                 | 0.368273922                               | 7.13105171                        | 2.214613599                             |
| 10.02951543                        | 2.775112221                                 | 0.35712783                                | 7.3609527                         | 2.334377894                             |
| 8.575154416                        | 2.692491475                                 | 0.372808083                               | 7.281734748                       | 2.133732887                             |
| 15.52828133                        | 2.973557195                                 | 0.35477244                                | 7.393611134                       | 2.65676552                              |
| 13.17823964                        | 2.963439166                                 | 0.325312322                               | 7.813066415                       | 2.695946535                             |
| 9.690027671                        | 2.761440496                                 | 0.355731336                               | 7.460356316                       | 2.340116021                             |
| 5.371358055                        | 2.243043572                                 | 0.409029102                               | 5.708346334                       | 1.538369094                             |
| 8.894534328                        | 2.711971301                                 | 0.358862215                               | 7.550313318                       | 2.246448862                             |
| 6.945553449                        | 2.550311279                                 | 0.398124802                               | 7.178910008                       | 1.885215411                             |
| 11.58440808                        | 2.854753593                                 | 0.353071018                               | 7.645900938                       | 2.489543366                             |
| 6.430773492                        | 2.503960798                                 | 0.396558547                               | 6.950425025                       | 1.878771092                             |
| 6.719852059                        | 2.236125101                                 | 0.38894501                                | 5.690114811                       | 1.969801153                             |
| 7.41880978                         | 2.561068818                                 | 0.378633811                               | 6.841344027                       | 2.057226222                             |
| 8.94562415                         | 2.70619207                                  | 0.378259315                               | 7.282029887                       | 2.179277988                             |
| 9.789966503                        | 2.767955072                                 | 0.346416815                               | 7.333070645                       | 2.354316522                             |
| 7.450022106                        | 2.608022542                                 | 0.372905696                               | 7.002452078                       | 2.064539423                             |
| 6.558433515                        | 2.521234478                                 | 0.396231912                               | 7.056316866                       | 1.885590386                             |
| 6.676069013                        | 2.534506157                                 | 0.397317754                               | 7.08609441                        | 1.901615317                             |
| 32.33299912                        | 3.545662434                                 | 0.221961265                               | 8.385756862                       | 4.379453989                             |
| 5.214144747                        | 2.355596392                                 | 0.422894457                               | 6.441862387                       | 1.655350884                             |
| 6.794929185                        | 2.430757838                                 | 0.382550758                               | 6.600996396                       | 1.967704957                             |
| 4.786989288                        | 2.288193333                                 | 0.411650086                               | 6.253214305                       | 1.541305732                             |
| 19.4363319                         | 3.197284587                                 | 0.260539012                               | 8.166972634                       | 3.432822263                             |

| log.sigma.4.5.mm.3D_glcm_DifferenceVariance | log.sigma.4.5.mm.3D_glcm_Idn | log.sigma.4.5.mm.3D_glcm_Idm | log.sigma.4.5.mm.3D_glcm_Correlation | log.sigma.4.5.mm.3D_glcm_Autocorrelation |
|---------------------------------------------|------------------------------|------------------------------|--------------------------------------|------------------------------------------|
| 6.047872212                                 | 0.921341248                  | 0.35087838                   | 0.761223371                          | 234.293249                               |
| 3.664545038                                 | 0.936108789                  | 0.37902807                   | 0.753820791                          | 312.4437867                              |
| 4.439695954                                 | 0.925404573                  | 0.343024353                  | 0.715209053                          | 229.8818076                              |
| 3.002650534                                 | 0.930195573                  | 0.394466749                  | 0.781809013                          | 141.0443922                              |
| 3.522048616                                 | 0.924958034                  | 0.448107356                  | 0.783557366                          | 129.0035002                              |
| 2.601473762                                 | 0.929624947                  | 0.430708126                  | 0.788417122                          | 121.7458578                              |
| 1.904190633                                 | 0.930657168                  | 0.530539136                  | 0.834539053                          | 69.23324079                              |
| 4.003028055                                 | 0.941218846                  | 0.390988468                  | 0.800332799                          | 312.439378                               |
| 4.681529041                                 | 0.929628981                  | 0.377901821                  | 0.755384979                          | 219.2491753                              |
| 4.161107533                                 | 0.942610795                  | 0.342708289                  | 0.773874299                          | 597.9243027                              |
| 2.2940049                                   | 0.930211308                  | 0.467649983                  | 0.758611477                          | 119.6707719                              |
| 4.060578697                                 | 0.928059837                  | 0.346138629                  | 0.696574627                          | 258.3174663                              |
| 2.422329133                                 | 0.942897427                  | 0.473115036                  | 0.767267167                          | 172.3359751                              |
| 3.025070701                                 | 0.914082862                  | 0.371594151                  | 0.725847445                          | 126.1336428                              |
| 7.332927008                                 | 0.925015456                  | 0.354033595                  | 0.694924761                          | 257.0796626                              |
| 4.960204115                                 | 0.937881601                  | 0.388677686                  | 0.768787315                          | 355.3021291                              |
| 3.969030292                                 | 0.937998792                  | 0.372240778                  | 0.734792096                          | 377.6103873                              |
| 3.697444442                                 | 0.943865304                  | 0.425598113                  | 0.786609536                          | 262.0663585                              |
| 4.003323765                                 | 0.924104035                  | 0.363286993                  | 0.647761803                          | 271.023212                               |
| 3.442969593                                 | 0.935235506                  | 0.409359133                  | 0.787131999                          | 224.0890404                              |
| 4.156570769                                 | 0.943646135                  | 0.372452144                  | 0.73088204                           | 360.8653808                              |
| 3.680370863                                 | 0.945741205                  | 0.379176629                  | 0.772886188                          | 310.0340505                              |
| 3.711944175                                 | 0.939272756                  | 0.363877977                  | 0.772161485                          | 299.9858305                              |
| 3.340059476                                 | 0.917461577                  | 0.372938778                  | 0.793781054                          | 179.5380418                              |
| 4.03455397                                  | 0.915532303                  | 0.338510624                  | 0.765984037                          | 197.8903679                              |
| 5.645424047                                 | 0.927003286                  | 0.329292795                  | 0.718354655                          | 327.9498368                              |
| 3.155752061                                 | 0.934247662                  | 0.396059726                  | 0.797559418                          | 235.1434022                              |
| 4.243972021                                 | 0.920523587                  | 0.323253304                  | 0.71437003                           | 256.5734167                              |
| 4.039799476                                 | 0.936369902                  | 0.373259976                  | 0.71110202                           | 349.1562624                              |
| 4.919982017                                 | 0.946425782                  | 0.372983299                  | 0.688753173                          | 421.505526                               |
| 3.909043316                                 | 0.938208095                  | 0.379357176                  | 0.780751205                          | 392.4487434                              |
| 4.247746918                                 | 0.939402383                  | 0.373711497                  | 0.741451051                          | 340.2969926                              |
| 3.957506085                                 | 0.94974562                   | 0.401426679                  | 0.810716888                          | 574.6742354                              |
| 5.607147406                                 | 0.913349932                  | 0.386833858                  | 0.671533764                          | 166.2250108                              |
| 4.128013532                                 | 0.914215551                  | 0.385003123                  | 0.70944361                           | 153.8181167                              |
| 3.135012155                                 | 0.93419963                   | 0.408814473                  | 0.725007433                          | 240.223491                               |
| 5.142061563                                 | 0.938693089                  | 0.327825733                  | 0.769666164                          | 469.8131644                              |
| 2.976666466                                 | 0.936094317                  | 0.4038425                    | 0.743298672                          | 273.5756114                              |
| 2.025707409                                 | 0.944233747                  | 0.489153015                  | 0.77916262                           | 179.5273743                              |
| 3.134166228                                 | 0.930186929                  | 0.436486549                  | 0.786702935                          | 120.8032969                              |
| 3.362537288                                 | 0.914544785                  | 0.382142348                  | 0.665671931                          | 145.8220756                              |
| 3.123821745                                 | 0.92703782                   | 0.414730261                  | 0.711142657                          | 152.4848107                              |
| 2.907945912                                 | 0.941086255                  | 0.436500334                  | 0.7708222                            | 274.3472667                              |
| 4.562740975                                 | 0.928650644                  | 0.429655614                  | 0.724228684                          | 151.5117542                              |
| 8.091577805                                 | 0.932040982                  | 0.361180416                  | 0.677627933                          | 420.4334034                              |
| 2.861880229                                 | 0.930724898                  | 0.379843432                  | 0.806849365                          | 182.8571997                              |
| 4.466442341                                 | 0.940804143                  | 0.366621212                  | 0.755351781                          | 386.0003522                              |
| 4.490904238                                 | 0.934974646                  | 0.414866404                  | 0.717614447                          | 294.3711523                              |
| 2.768371598                                 | 0.903244193                  | 0.429493735                  | 0.758562492                          | 74.73582601                              |
| 3.983929873                                 | 0.936103366                  | 0.425513398                  | 0.774445343                          | 190.6643092                              |
| 3.102530476                                 | 0.948435247                  | 0.443203217                  | 0.790048544                          | 340.1710321                              |
| 2.857082303                                 | 0.946824741                  | 0.492981772                  | 0.722847946                          | 259.5919858                              |
| 3.103077264                                 | 0.943559979                  | 0.429295755                  | 0.811839628                          | 217.4872873                              |
| 5.320739834                                 | 0.933087627                  | 0.360174911                  | 0.654600407                          | 435.2328211                              |
| 4.113818267                                 | 0.928506682                  | 0.350175135                  | 0.738198527                          | 297.5933299                              |
| 5.012148121                                 | 0.929543352                  | 0.334227376                  | 0.754355387                          | 315.7599013                              |
| 5.745071907                                 | 0.938623248                  | 0.355241889                  | 0.724317277                          | 498.4891651                              |
| 3.837778786                                 | 0.945837995                  | 0.486533595                  | 0.788632299                          | 183.3304188                              |
| 3.534230344                                 | 0.926369282                  | 0.373168824                  | 0.719859004                          | 258.0060176                              |
| 1.774200679                                 | 0.925970268                  | 0.462934961                  | 0.707983565                          | 138.9049478                              |
| 3.938718422                                 | 0.936264276                  | 0.425618877                  | 0.802901394                          | 241.6262759                              |
| 4.107426716                                 | 0.949895155                  | 0.396385195                  | 0.754479978                          | 430.0556479                              |
| 4.030163193                                 | 0.935992423                  | 0.385109656                  | 0.732818927                          | 300.2172364                              |
| 3.938510766                                 | 0.905464351                  | 0.317588618                  | 0.696369298                          | 217.8529138                              |
| 4.727261239                                 | 0.904699159                  | 0.330722976                  | 0.590161256                          | 204.712849                               |
| 4.728258927                                 | 0.923084182                  | 0.355487604                  | 0.755571712                          | 160.2596755                              |
| 4.075202465                                 | 0.934405473                  | 0.417118953                  | 0.824206354                          | 164.5386638                              |
| 4.801188751                                 | 0.929366908                  | 0.374343919                  | 0.780278033                          | 226.7746188                              |
| 3.069348308                                 | 0.926951224                  | 0.410040251                  | 0.735418312                          | 217.7644281                              |
| 3.982754317                                 | 0.940394985                  | 0.366957272                  | 0.774446478                          | 390.487835                               |
| 6.375169714                                 | 0.92470976                   | 0.306209196                  | 0.759570512                          | 381.5408752                              |
| 3.841534964                                 | 0.936076602                  | 0.426550551                  | 0.7197779174                         | 216.4551824                              |
| 4.114067949                                 | 0.94233149                   | 0.382558906                  | 0.773775604                          | 364.8073444                              |
| 3.508580364                                 | 0.939794326                  | 0.373137939                  | 0.722180078                          | 363.3642482                              |
| 4.693621871                                 | 0.94634126                   | 0.356414954                  | 0.788237349                          | 349.815642                               |
| 5.151802216                                 | 0.939466613                  | 0.358500703                  | 0.732205904                          | 321.7848054                              |
| 3.235509093                                 | 0.942415918                  | 0.44196452                   | 0.734009633                          | 253.1144425                              |
| 3.985988299                                 | 0.923447211                  | 0.377736209                  | 0.718123539                          | 241.7496532                              |
| 4.329010156                                 | 0.933507948                  | 0.36149114                   | 0.696113346                          | 332.5980246                              |
| 3.881925005                                 | 0.940493487                  | 0.390525432                  | 0.754504341                          | 370.2859933                              |
| 8.200556396                                 | 0.944072236                  | 0.367371469                  | 0.664529309                          | 716.4081115                              |
| 5.635122584                                 | 0.933733086                  | 0.32584122                   | 0.727618903                          | 414.6499439                              |
| 4.074121724                                 | 0.939965346                  | 0.348043609                  | 0.748506193                          | 389.9286332                              |
| 2.586872219                                 | 0.919957394                  | 0.509825474                  | 0.680846338                          | 84.75842621                              |
| 3.664662934                                 | 0.935461542                  | 0.360100337                  | 0.778252147                          | 344.7292408                              |
| 3.314724775                                 | 0.933819467                  | 0.423609339                  | 0.802254807                          | 133.3735386                              |
| 5.167001934                                 | 0.931648064                  | 0.346542417                  | 0.754317835                          | 335.485829                               |
| 2.780079975                                 | 0.928469574                  | 0.411805837                  | 0.756777303                          | 154.4395445                              |
| 1.938115021                                 | 0.878369994                  | 0.389728788                  | 0.516439684                          | 74.32785024                              |
| 2.975284817                                 | 0.912193565                  | 0.380742883                  | 0.752338682                          | 138.4234404                              |
| 4.085181164                                 | 0.93758443                   | 0.379719474                  | 0.734148482                          | 304.9337883                              |
| 4.070736707                                 | 0.918692865                  | 0.347877377                  | 0.726002512                          | 208.7692865                              |
| 3.059776709                                 | 0.924826596                  | 0.382352918                  | 0.712936906                          | 211.7928759                              |
| 2.886193514                                 | 0.945108669                  | 0.414277164                  | 0.778930421                          | 367.4905942                              |
| 2.963314092                                 | 0.93292435                   | 0.410921964                  | 0.750488828                          | 174.590522                               |
| 12.45872152                                 | 0.904910778                  | 0.22062498                   | 0.675183461                          | 530.4425283                              |
| 2.351358614                                 | 0.938714139                  | 0.452299637                  | 0.756674103                          | 207.2136207                              |
| 2.503022077                                 | 0.907540453                  | 0.396322979                  | 0.766515773                          | 91.87568701                              |
| 2.225833166                                 | 0.92637952                   | 0.486505283                  | 0.761569789                          | 87.03683379                              |
| 7.109002516                                 | 0.912929381                  | 0.25163481                   | 0.729499643                          | 343.1143952                              |

| log.sigma.4.5.mm.3D_glcm_SumEntropy | log.sigma.4.5.mm.3D_glcm_AverageIntensity | log.sigma.4.5.mm.3D_glcm_Energy | log.sigma.4.5.mm.3D_glcm_SumSquares | log.sigma.4.5.mm.3D_glcm_ClusterProminence |
|-------------------------------------|-------------------------------------------|---------------------------------|-------------------------------------|--------------------------------------------|
| 5.204060399                         | 14.66502946                               | 0.007603877                     | 27.63782151                         | 20515.27088                                |
| 4.899847279                         | 17.3717708                                | 0.010380219                     | 17.71144684                         | 11352.24205                                |
| 4.942435638                         | 14.72803437                               | 0.00871742                      | 19.03046916                         | 13045.71208                                |
| 4.887472295                         | 11.33187764                               | 0.010617948                     | 16.15216766                         | 9477.260424                                |
| 4.700398713                         | 10.76882729                               | 0.019815745                     | 16.609536                           | 8342.45103                                 |
| 4.666462137                         | 10.5179961                                | 0.016423753                     | 14.01876932                         | 8298.29757                                 |
| 4.291124967                         | 7.667679161                               | 0.03340303                      | 12.40291844                         | 4330.803169                                |
| 5.102288759                         | 17.24529441                               | 0.009484405                     | 21.98606317                         | 19194.17624                                |
| 4.999401077                         | 14.31058169                               | 0.009228763                     | 20.70562436                         | 12064.97453                                |
| 5.164984401                         | 24.13841184                               | 0.006882113                     | 22.23838144                         | 21919.54027                                |
| 4.507574136                         | 10.5754792                                | 0.017817414                     | 10.28043866                         | 3643.68049                                 |
| 4.891995283                         | 15.74560969                               | 0.00874314                      | 16.57169005                         | 10387.3106                                 |
| 4.590265438                         | 12.80198502                               | 0.018661204                     | 10.96167439                         | 5228.51922                                 |
| 4.793514209                         | 10.7745585                                | 0.009954155                     | 13.81085912                         | 6133.21569                                 |
| 5.106997465                         | 15.56564514                               | 0.007708428                     | 25.53162638                         | 22430.83985                                |
| 5.134386416                         | 18.47704193                               | 0.010584085                     | 22.91627824                         | 22150.80314                                |
| 4.892864189                         | 19.16305222                               | 0.01101049                      | 17.44269387                         | 16180.55922                                |
| 4.944758419                         | 15.80393519                               | 0.011493344                     | 18.3680902                          | 11697.60991                                |
| 4.713415048                         | 16.20756383                               | 0.010100013                     | 13.52792717                         | 5848.273344                                |
| 4.944077158                         | 14.5076229                                | 0.011671885                     | 17.76250693                         | 13439.92193                                |
| 4.97009128                          | 18.72682504                               | 0.008752247                     | 17.4273244                          | 13690.53461                                |
| 5.022212243                         | 17.24994409                               | 0.009096672                     | 18.94238664                         | 15579.52473                                |
| 5.053037054                         | 16.94939555                               | 0.008511481                     | 19.773179                           | 15692.42726                                |
| 4.993710817                         | 12.76588802                               | 0.010415548                     | 20.83697854                         | 13123.64345                                |
| 5.100188726                         | 13.45462939                               | 0.006891193                     | 21.98340359                         | 15796.15372                                |
| 5.104597467                         | 17.72022788                               | 0.007592668                     | 23.41697889                         | 21560.90467                                |
| 4.991616386                         | 14.86376398                               | 0.009170361                     | 18.70799343                         | 10708.5182                                 |
| 5.016457942                         | 15.60429029                               | 0.006975881                     | 19.39263315                         | 12830.24507                                |
| 4.835133813                         | 18.4617417                                | 0.011226868                     | 16.19828459                         | 13854.06816                                |
| 4.906255884                         | 20.30708451                               | 0.010083621                     | 16.50871574                         | 13322.58169                                |
| 5.060463099                         | 19.48089245                               | 0.008484605                     | 19.94917141                         | 18444.66263                                |
| 4.988168868                         | 18.14487058                               | 0.00858222                      | 18.53088313                         | 16756.38483                                |
| 5.02708402                          | 23.62711117                               | 0.011102977                     | 21.82592692                         | 34436.41768                                |
| 4.785351334                         | 12.40719311                               | 0.012950095                     | 18.2206037                          | 7835.076499                                |
| 4.823646093                         | 11.93745285                               | 0.011453297                     | 15.98288087                         | 8265.510918                                |
| 4.722996912                         | 15.19748193                               | 0.012340341                     | 12.91642218                         | 6291.079794                                |
| 5.253407955                         | 21.27631056                               | 0.00666305                      | 25.94492961                         | 31142.29848                                |
| 4.763858035                         | 16.24799559                               | 0.012193697                     | 13.49865082                         | 7653.873605                                |
| 4.495368895                         | 13.10117685                               | 0.021350622                     | 10.08291818                         | 4445.417331                                |
| 4.77178574                          | 10.4037382                                | 0.014887096                     | 15.92798591                         | 8303.836815                                |
| 4.619303869                         | 11.74216769                               | 0.011668304                     | 11.8932895                          | 3884.912321                                |
| 4.645412028                         | 11.98951125                               | 0.012886788                     | 12.22317022                         | 4510.716267                                |
| 4.718119773                         | 16.26290687                               | 0.01349793                      | 13.69048783                         | 6149.149567                                |
| 4.762566894                         | 11.82712522                               | 0.015221426                     | 16.03593834                         | 8599.747789                                |
| 5.139584964                         | 20.21465964                               | 0.008525979                     | 24.79955813                         | 26975.01584                                |
| 5.050192904                         | 12.96078431                               | 0.008062435                     | 18.42850517                         | 11945.34716                                |
| 5.073152895                         | 19.33667181                               | 0.008548788                     | 20.26007899                         | 20435.01483                                |
| 4.735608288                         | 16.83926758                               | 0.015180386                     | 16.14651571                         | 13557.15595                                |
| 4.581590306                         | 8.010791161                               | 0.020161373                     | 13.8882832                          | 4792.831148                                |
| 4.87809216                          | 13.31699062                               | 0.014247595                     | 18.11690678                         | 11665.68894                                |
| 4.795597747                         | 18.15872256                               | 0.014874735                     | 15.37800296                         | 9687.82838                                 |
| 4.371449077                         | 15.89838124                               | 0.024902919                     | 9.722974092                         | 6060.571528                                |
| 4.897375729                         | 14.27868384                               | 0.011951114                     | 17.69168748                         | 10167.30507                                |
| 4.836353622                         | 20.72272234                               | 0.00931927                      | 16.09168595                         | 8335.943581                                |
| 5.030090811                         | 16.89247258                               | 0.007466556                     | 19.2265864                          | 12287.29931                                |
| 5.203202295                         | 17.32512697                               | 0.006778251                     | 24.35967445                         | 21941.30187                                |
| 5.097043037                         | 21.81805832                               | 0.008022042                     | 21.73412699                         | 24541.44937                                |
| 4.678623085                         | 13.07368702                               | 0.02489048                      | 16.64384991                         | 12878.62176                                |
| 4.808752906                         | 15.72502929                               | 0.010765739                     | 15.26857086                         | 9336.806509                                |
| 4.305720754                         | 11.56995981                               | 0.018998122                     | 7.119328072                         | 1803.88508                                 |
| 5.030477475                         | 15.03280405                               | 0.009710655                     | 20.23655369                         | 11256.90517                                |
| 4.942621164                         | 20.47116132                               | 0.010980765                     | 17.36450801                         | 15814.26957                                |
| 4.912840671                         | 17.0173464                                | 0.009901576                     | 16.99095368                         | 11654.29846                                |
| 4.928689663                         | 14.33966775                               | 0.007165061                     | 17.55214081                         | 8857.878763                                |
| 4.685399011                         | 14.00047071                               | 0.009861032                     | 14.76611059                         | 4985.450563                                |
| 4.996913818                         | 11.99874902                               | 0.009004913                     | 22.21646146                         | 15534.60976                                |
| 5.034415901                         | 12.05239602                               | 0.012646322                     | 24.25864989                         | 21358.07466                                |
| 5.105906986                         | 14.49861184                               | 0.008085133                     | 23.54801033                         | 15685.23777                                |
| 4.740434316                         | 14.41241389                               | 0.011960555                     | 13.52748586                         | 6095.135217                                |
| 5.076575442                         | 19.39604829                               | 0.008968187                     | 20.71792877                         | 18592.85732                                |
| 5.356880114                         | 18.99371122                               | 0.004954709                     | 31.83819248                         | 39321.43876                                |
| 4.617482065                         | 14.37579185                               | 0.016312171                     | 13.83516943                         | 7217.617489                                |
| 5.043309666                         | 18.75679863                               | 0.00929354                      | 20.17277522                         | 21564.61582                                |
| 4.831389606                         | 18.84457853                               | 0.010065003                     | 15.05070588                         | 10232.6785                                 |
| 5.241363112                         | 18.23250689                               | 0.007240669                     | 24.81553591                         | 27273.96806                                |
| 5.081913426                         | 17.56528183                               | 0.008357752                     | 21.54219449                         | 19952.21883                                |
| 4.676438433                         | 15.63139558                               | 0.014922942                     | 12.67311537                         | 7424.003078                                |
| 4.833926397                         | 15.16710289                               | 0.010818881                     | 16.28918173                         | 10107.15031                                |
| 4.866698058                         | 17.99626055                               | 0.010104416                     | 16.6573272                          | 11852.76966                                |
| 4.899314232                         | 18.96371019                               | 0.011802969                     | 17.61736293                         | 16774.46341                                |
| 4.980198086                         | 26.60418411                               | 0.011097485                     | 22.87940188                         | 33468.78551                                |
| 5.174653041                         | 20.01288257                               | 0.007100091                     | 23.75337734                         | 26346.3686                                 |
| 4.991496946                         | 19.45820078                               | 0.008746591                     | 19.27351184                         | 16215.63047                                |
| 4.15428302                          | 8.891821096                               | 0.032342408                     | 8.367159971                         | 1623.647006                                |
| 5.082564217                         | 18.20606445                               | 0.007822879                     | 20.39847433                         | 18450.92506                                |
| 4.936990379                         | 10.92083829                               | 0.010246189                     | 17.55761235                         | 10124.48867                                |
| 5.175828022                         | 17.88467087                               | 0.007712636                     | 24.00149148                         | 22055.78709                                |
| 4.750861431                         | 12.01244544                               | 0.012052366                     | 13.34084242                         | 5610.000261                                |
| 3.984411843                         | 8.417258969                               | 0.025131978                     | 6.829029899                         | 829.3737013                                |
| 4.773477299                         | 11.26565536                               | 0.012532506                     | 15.18358536                         | 7760.743538                                |
| 4.882604914                         | 17.18253371                               | 0.009573752                     | 17.21324384                         | 8454.069944                                |
| 4.923568401                         | 13.99026242                               | 0.008789677                     | 17.91950581                         | 9906.539482                                |
| 4.721571066                         | 14.23120592                               | 0.011662613                     | 12.97193652                         | 7213.45065                                 |
| 4.829632177                         | 18.90848264                               | 0.013004047                     | 14.97476598                         | 11576.49697                                |
| 4.795796954                         | 12.82624585                               | 0.011159003                     | 13.40273342                         | 7056.425825                                |
| 5.575254312                         | 22.47796815                               | 0.004162644                     | 48.63273938                         | 85350.27687                                |
| 4.505859195                         | 14.10815897                               | 0.018770444                     | 10.77339234                         | 4339.218175                                |
| 4.699458862                         | 8.967094609                               | 0.01420973                      | 14.8127758                          | 5533.825789                                |
| 4.446177322                         | 8.908476641                               | 0.022167509                     | 10.05970245                         | 3225.976866                                |
| 5.424251463                         | 17.89444701                               | 0.004890287                     | 36.0634826                          | 48604.13912                                |

| log.sigma.4.5.mm.3D_glc_m_SumAverage | log.sigma.4.5.mm.3D_glc_m_lmc2 | log.sigma.4.5.mm.3D_glc_m_lmc1 | log.sigma.4.5.mm.3D_glc_m_DifferenceAverage | log.sigma.4.5.mm.3D_glc_m_Id |
|--------------------------------------|--------------------------------|--------------------------------|---------------------------------------------|------------------------------|
| 29.23549352                          | 0.933282195                    | -0.2430079                     | 2.572468077                                 | 0.425482167                  |
| 34.60834641                          | 0.884545789                    | -0.200912525                   | 2.157499853                                 | 0.450680909                  |
| 29.42183777                          | 0.882613714                    | -0.192347417                   | 2.474617412                                 | 0.420498879                  |
| 22.66375527                          | 0.886608264                    | -0.203909847                   | 1.982398174                                 | 0.464293929                  |
| 21.53765458                          | 0.932005198                    | -0.277418545                   | 1.847980248                                 | 0.506025594                  |
| 21.03599221                          | 0.897354535                    | -0.226226149                   | 1.768873124                                 | 0.493386114                  |
| 15.33535832                          | 0.929963867                    | -0.306248799                   | 1.36990439                                  | 0.575684471                  |
| 34.35641699                          | 0.930443569                    | -0.248007952                   | 2.108550884                                 | 0.460184317                  |
| 28.55761632                          | 0.897213639                    | -0.203646891                   | 2.261879622                                 | 0.449311462                  |
| 48.18694641                          | 0.890205686                    | -0.193782066                   | 2.414178486                                 | 0.421705322                  |
| 21.1509584                           | 0.874497971                    | -0.211406103                   | 1.600967639                                 | 0.522270544                  |
| 31.43134704                          | 0.85680887                     | -0.174054938                   | 2.373752144                                 | 0.425163085                  |
| 25.60397004                          | 0.88002435                     | -0.21375583                    | 1.600447964                                 | 0.528356197                  |
| 21.54911699                          | 0.852828883                    | -0.176388594                   | 2.099662013                                 | 0.446343459                  |
| 30.97538044                          | 0.895514058                    | -0.204983021                   | 2.718324765                                 | 0.427277675                  |
| 36.76018373                          | 0.902077078                    | -0.209991081                   | 2.32073961                                  | 0.459711633                  |
| 38.19853268                          | 0.892996828                    | -0.211230409                   | 2.227224203                                 | 0.445260225                  |
| 31.49379757                          | 0.914833255                    | -0.236149337                   | 1.950543478                                 | 0.487937142                  |
| 32.39421302                          | 0.851037566                    | -0.181222519                   | 2.27306197                                  | 0.437848036                  |
| 28.99647219                          | 0.901415263                    | -0.217085699                   | 1.982119358                                 | 0.475404025                  |
| 37.31179873                          | 0.84437178                     | -0.16563235                    | 2.255117737                                 | 0.445161377                  |
| 34.38173859                          | 0.901459594                    | -0.215059                      | 2.159967917                                 | 0.451628554                  |
| 33.76285996                          | 0.879459411                    | -0.189054416                   | 2.235967068                                 | 0.439578481                  |
| 25.53177605                          | 0.92842701                     | -0.25409114                    | 2.205327588                                 | 0.445938374                  |
| 26.90925879                          | 0.870155462                    | -0.179983187                   | 2.450891099                                 | 0.417761702                  |
| 35.29216961                          | 0.896170534                    | -0.198392828                   | 2.675659305                                 | 0.409270289                  |
| 29.68720008                          | 0.913324518                    | -0.232567346                   | 2.005712382                                 | 0.465599883                  |
| 31.16915183                          | 0.835165755                    | -0.153770913                   | 2.553430956                                 | 0.406010906                  |
| 36.76115023                          | 0.845965964                    | -0.17603646                    | 2.22461538                                  | 0.446076038                  |
| 40.49226477                          | 0.850657588                    | -0.169838701                   | 2.321515941                                 | 0.444631112                  |
| 38.82772608                          | 0.891205288                    | -0.201374557                   | 2.152971595                                 | 0.450744349                  |
| 36.14712683                          | 0.862760223                    | -0.178421863                   | 2.244027702                                 | 0.446545101                  |
| 47.19369567                          | 0.923080573                    | -0.242120411                   | 2.05462147                                  | 0.468792255                  |
| 24.81438621                          | 0.931470062                    | -0.267494459                   | 2.391958499                                 | 0.456103491                  |
| 23.87490571                          | 0.895060911                    | -0.21675365                    | 2.228461632                                 | 0.454847674                  |
| 30.38717654                          | 0.855681625                    | -0.181994578                   | 1.937534573                                 | 0.475337263                  |
| 42.40460863                          | 0.894352745                    | -0.193135022                   | 2.604282355                                 | 0.408386777                  |
| 32.47276541                          | 0.864246465                    | -0.186978195                   | 1.941555131                                 | 0.472055744                  |
| 26.2023537                           | 0.896723436                    | -0.247651662                   | 1.49590952                                  | 0.540582029                  |
| 20.8074764                           | 0.909167078                    | -0.238406508                   | 1.847166543                                 | 0.49837521                   |
| 23.48433538                          | 0.828455669                    | -0.163348449                   | 2.100128302                                 | 0.454343508                  |
| 23.97902251                          | 0.847692484                    | -0.181670534                   | 1.929610889                                 | 0.480654556                  |
| 32.49217548                          | 0.888972578                    | -0.212470217                   | 1.785024969                                 | 0.497795433                  |
| 23.65425044                          | 0.898802612                    | -0.225193849                   | 2.002430591                                 | 0.491278533                  |
| 40.16248072                          | 0.872530688                    | -0.183222363                   | 2.752987758                                 | 0.432186095                  |
| 25.91827762                          | 0.902611717                    | -0.211976516                   | 2.034021458                                 | 0.453019334                  |
| 38.50295978                          | 0.878669404                    | -0.187936636                   | 2.317249844                                 | 0.440406158                  |
| 33.63898353                          | 0.878456277                    | -0.201190298                   | 2.085453241                                 | 0.478248746                  |
| 16.02158232                          | 0.940757555                    | -0.309845385                   | 1.874293743                                 | 0.491368918                  |
| 26.59591401                          | 0.93096138                     | -0.262249034                   | 1.969725049                                 | 0.487665456                  |
| 36.23095547                          | 0.900753488                    | -0.224699475                   | 1.774243033                                 | 0.502191628                  |
| 31.78717027                          | 0.879598964                    | -0.221674988                   | 1.554833393                                 | 0.542196419                  |
| 28.51620703                          | 0.911533221                    | -0.231483201                   | 1.828786302                                 | 0.49127428                   |
| 41.21952392                          | 0.881578066                    | -0.201351646                   | 2.372544026                                 | 0.435779737                  |
| 33.68623911                          | 0.864120146                    | -0.175324273                   | 2.359080842                                 | 0.4282229                    |
| 34.5059539                           | 0.89741581                     | -0.198813341                   | 2.56544269                                  | 0.413187632                  |
| 43.51830515                          | 0.879672871                    | -0.187292879                   | 2.494454562                                 | 0.430142213                  |
| 26.11041813                          | 0.916034047                    | -0.253190688                   | 1.721229022                                 | 0.537729336                  |
| 31.43638118                          | 0.871153191                    | -0.189366321                   | 2.188269689                                 | 0.446825552                  |
| 23.13991962                          | 0.838042357                    | -0.187070351                   | 1.526284155                                 | 0.519928065                  |
| 30.0353569                           | 0.919653314                    | -0.233074326                   | 1.962327032                                 | 0.488566198                  |
| 40.82498431                          | 0.878740691                    | -0.194215828                   | 2.102009172                                 | 0.464386125                  |
| 33.94121421                          | 0.881627501                    | -0.196413593                   | 2.171758701                                 | 0.455881229                  |
| 28.67933551                          | 0.841000409                    | -0.158827889                   | 2.55341374                                  | 0.402250859                  |
| 28.00094142                          | 0.859744195                    | -0.185035597                   | 2.611948298                                 | 0.410827921                  |
| 23.96970185                          | 0.894671702                    | -0.204307097                   | 2.401972069                                 | 0.43067941                   |
| 24.06508666                          | 0.947032318                    | -0.283316981                   | 2.025587485                                 | 0.480658148                  |
| 28.900853                            | 0.899341592                    | -0.204977092                   | 2.273095471                                 | 0.446397521                  |
| 28.82482777                          | 0.884920644                    | -0.216888503                   | 1.931664241                                 | 0.476563997                  |
| 38.6992887                           | 0.895110834                    | -0.204678575                   | 2.261633655                                 | 0.441126685                  |
| 37.80773856                          | 0.877188507                    | -0.173855397                   | 2.935829039                                 | 0.388866716                  |
| 28.74063885                          | 0.881133323                    | -0.212585239                   | 1.900051773                                 | 0.488517057                  |
| 37.37458142                          | 0.88672272                     | -0.197877962                   | 2.189502216                                 | 0.453878489                  |
| 37.55351149                          | 0.833161357                    | -0.160939326                   | 2.149168074                                 | 0.446485964                  |
| 36.34090533                          | 0.9049439                      | -0.207072952                   | 2.373828032                                 | 0.431831667                  |
| 34.98504797                          | 0.884430742                    | -0.193937465                   | 2.447816476                                 | 0.432494722                  |
| 31.23487837                          | 0.877474886                    | -0.20520166                    | 1.812936073                                 | 0.501222333                  |
| 30.33420578                          | 0.87849807                     | -0.202054849                   | 2.214613599                                 | 0.449520235                  |
| 35.84566649                          | 0.837349946                    | -0.163755953                   | 2.334377894                                 | 0.436115365                  |
| 37.79304602                          | 0.865187996                    | -0.183475127                   | 2.133732887                                 | 0.460137111                  |
| 52.9567883                           | 0.904874288                    | -0.213488383                   | 2.65676552                                  | 0.43706279                   |
| 39.85777422                          | 0.875018047                    | -0.178963797                   | 2.695946535                                 | 0.405982794                  |
| 38.75014681                          | 0.876526137                    | -0.186798103                   | 2.340116021                                 | 0.425798465                  |
| 17.78364219                          | 0.906988921                    | -0.287896745                   | 1.538369094                                 | 0.557987244                  |
| 36.27909436                          | 0.883881147                    | -0.193950571                   | 2.246448862                                 | 0.43625972                   |
| 21.84167658                          | 0.904171441                    | -0.21856837                    | 1.885215411                                 | 0.487374478                  |
| 35.63806603                          | 0.911769071                    | -0.217214265                   | 2.489543366                                 | 0.422643375                  |
| 24.02489088                          | 0.872550053                    | -0.197904826                   | 1.8787771092                                | 0.478500379                  |
| 16.83451794                          | 0.870903518                    | -0.242845713                   | 1.969801153                                 | 0.460672724                  |
| 22.53131072                          | 0.917689247                    | -0.249809121                   | 2.057226222                                 | 0.453351529                  |
| 34.21366869                          | 0.866512459                    | -0.180278193                   | 2.179277988                                 | 0.450702437                  |
| 27.98052483                          | 0.890598129                    | -0.200460829                   | 2.354316522                                 | 0.426402827                  |
| 28.46241184                          | 0.850730328                    | -0.177544121                   | 2.064539423                                 | 0.454924268                  |
| 37.73032748                          | 0.880454703                    | -0.202411256                   | 1.885590386                                 | 0.480280668                  |
| 25.65249169                          | 0.861452029                    | -0.183920956                   | 1.901615317                                 | 0.477358425                  |
| 44.59500258                          | 0.93813322                     | -0.227063199                   | 4.379453989                                 | 0.3106493                    |
| 28.21631794                          | 0.883137892                    | -0.223192048                   | 1.655350884                                 | 0.51077995                   |
| 17.93418922                          | 0.936277728                    | -0.287950651                   | 1.967704957                                 | 0.466274346                  |
| 17.81695328                          | 0.896789004                    | -0.247909702                   | 1.541305732                                 | 0.539918425                  |
| 35.59924876                          | 0.919543845                    | -0.211630962                   | 3.432822263                                 | 0.343266707                  |

| log.sigma.4.5.mm.3D_glcm_ClusterTendency | log.sigma.4.5.mm.3D_firstorder_InterquartileRange | log.sigma.4.5.mm.3D_firstorder_Skewness | log.sigma.4.5.mm.3D_firstorder_Uniformity |
|------------------------------------------|---------------------------------------------------|-----------------------------------------|-------------------------------------------|
| 95.19140018                              | 192.7025127                                       | 0.146363823                             | 0.056029917                               |
| 60.4263782                               | 138.5392962                                       | 0.134439895                             | 0.0741125                                 |
| 64.56830277                              | 145.9514275                                       | -0.234098076                            | 0.070337076                               |
| 57.5561921                               | 131.307518                                        | 0.442026799                             | 0.073812793                               |
| 59.26720126                              | 145.1376657                                       | 0.541529933                             | 0.088810694                               |
| 50.244941                                | 98.92381096                                       | 0.728460289                             | 0.092294424                               |
| 45.64312659                              | 151.0042496                                       | 0.63447603                              | 0.111363716                               |
| 77.84043351                              | 155.1583405                                       | 0.185649663                             | 0.064370593                               |
| 71.25802403                              | 166.2583733                                       | 0.380137459                             | 0.066443662                               |
| 79.82865879                              | 157.1531925                                       | -0.297276153                            | 0.06135423                                |
| 36.18225857                              | 102.902071                                        | 0.471527968                             | 0.09669921                                |
| 55.18935915                              | 129.2297096                                       | -0.112405133                            | 0.072384189                               |
| 38.78860821                              | 98.46950912                                       | 0.527986481                             | 0.094353786                               |
| 47.69087515                              | 121.8843322                                       | -0.055547806                            | 0.0762279111                              |
| 84.08200524                              | 156.7161584                                       | 0.635099333                             | 0.062143201                               |
| 80.41048436                              | 153.253767                                        | -0.040137022                            | 0.065205328                               |
| 60.31288991                              | 119.7628818                                       | -0.345037192                            | 0.073637096                               |
| 63.95884467                              | 153.2738228                                       | 0.441217597                             | 0.071608732                               |
| 44.13510161                              | 135.1064262                                       | -0.162282591                            | 0.07715483                                |
| 63.02375101                              | 127.2613068                                       | -0.10118885                             | 0.075271861                               |
| 60.6759015                               | 129.0991299                                       | -0.333900049                            | 0.070834512                               |
| 66.46934636                              | 139.0273533                                       | 0.144954446                             | 0.06912821                                |
| 68.83831045                              | 136.3161345                                       | 0.295589397                             | 0.068142699                               |
| 74.77836344                              | 169.7073538                                       | 0.038518941                             | 0.0663908                                 |
| 77.67317279                              | 159.446496                                        | -0.398232561                            | 0.062065981                               |
| 79.21929766                              | 146.9607439                                       | 0.219041848                             | 0.064088705                               |
| 66.43345849                              | 157.2379072                                       | 0.329749303                             | 0.06594203                                |
| 65.67301959                              | 146.9910285                                       | -0.392423263                            | 0.066858327                               |
| 54.44658858                              | 116.2699585                                       | -0.546863866                            | 0.078036122                               |
| 56.87817232                              | 125.3918085                                       | -0.193167327                            | 0.071491423                               |
| 70.76319044                              | 138.9714766                                       | -0.385996436                            | 0.06676306                                |
| 63.95220491                              | 141.3252907                                       | -0.063334247                            | 0.067954448                               |
| 79.76134209                              | 133.1565895                                       | -0.553076137                            | 0.071948768                               |
| 60.9630272                               | 175.9122314                                       | 0.164528503                             | 0.070413769                               |
| 54.56100833                              | 127.157707                                        | -0.02353912                             | 0.075255154                               |
| 44.45318973                              | 111.7616386                                       | 0.195041218                             | 0.082686408                               |
| 93.17797274                              | 150.5563622                                       | -0.124949733                            | 0.058855634                               |
| 46.62967161                              | 107.2521744                                       | -0.244660933                            | 0.083481601                               |
| 35.9339809                               | 92.51977444                                       | 0.368017155                             | 0.099795846                               |
| 56.96499274                              | 143.4924765                                       | 0.610008172                             | 0.082434646                               |
| 39.65711369                              | 123.7922888                                       | 0.139655655                             | 0.082048392                               |
| 41.89577179                              | 129.2660809                                       | 0.389350723                             | 0.082759474                               |
| 47.77933485                              | 130.5757027                                       | 0.286599807                             | 0.082377095                               |
| 55.30903348                              | 135.0994148                                       | 0.617481267                             | 0.082826777                               |
| 84.81762355                              | 134.7385589                                       | -0.479656606                            | 0.063054205                               |
| 66.49408409                              | 143.9789014                                       | -0.087785006                            | 0.065953191                               |
| 71.52410911                              | 136.3805385                                       | -0.207958632                            | 0.066308441                               |
| 54.83545937                              | 96.17874718                                       | -0.983375143                            | 0.091121268                               |
| 48.8078761                               | 143.722167                                        | 0.426451534                             | 0.089080026                               |
| 63.23062935                              | 151.8205624                                       | 0.618010189                             | 0.075241141                               |
| 54.28382637                              | 120.9671955                                       | 0.234565023                             | 0.081050734                               |
| 33.27211973                              | 76.9119072                                        | -0.003438344                            | 0.115036948                               |
| 63.2020243                               | 152.1167908                                       | 0.480708127                             | 0.071870291                               |
| 53.21807142                              | 139.8569622                                       | 0.014679986                             | 0.071235472                               |
| 65.41484679                              | 153.3284302                                       | -0.03425601                             | 0.064190774                               |
| 84.18920848                              | 154.7513618                                       | 0.037289317                             | 0.059266487                               |
| 76.34608149                              | 145.0519371                                       | -0.419825366                            | 0.065705678                               |
| 58.45240102                              | 111.0908113                                       | 0.936614116                             | 0.101124602                               |
| 52.2058591                               | 113.5919132                                       | -0.036788092                            | 0.079338753                               |
| 24.30641075                              | 88.22724533                                       | -0.291618746                            | 0.10887856                                |
| 72.22482166                              | 170.6579666                                       | 0.220237701                             | 0.064291834                               |
| 62.19890758                              | 123.3333855                                       | -0.236174457                            | 0.074501757                               |
| 57.71713516                              | 129.6450672                                       | -0.153803288                            | 0.073252413                               |
| 59.52808468                              | 160.4594564                                       | -0.224606618                            | 0.065458941                               |
| 46.87312915                              | 152.6459723                                       | -0.140002177                            | 0.073059466                               |
| 77.08899059                              | 177.2810631                                       | 0.560443887                             | 0.066159173                               |
| 87.29291064                              | 160.6712132                                       | 0.729640297                             | 0.069884327                               |
| 81.75981371                              | 170.9220114                                       | 0.362901766                             | 0.062232294                               |
| 47.08510642                              | 125.6080856                                       | -0.019201352                            | 0.079023285                               |
| 73.5502438                               | 142.7516365                                       | 0.018822908                             | 0.066117384                               |
| 111.9732342                              | 187.6637979                                       | -0.485670565                            | 0.051370732                               |
| 47.41162287                              | 111.5562248                                       | 0.634834865                             | 0.09122327                                |
| 71.33269489                              | 138.896513                                        | -0.134273085                            | 0.069342994                               |
| 51.43415294                              | 120.9129028                                       | -0.423253616                            | 0.074901374                               |
| 88.82912133                              | 161.9018879                                       | 0.135277599                             | 0.058855324                               |
| 74.32935188                              | 151.6151638                                       | -0.074843135                            | 0.064673793                               |
| 43.42796443                              | 105.6883354                                       | -0.239004667                            | 0.088082005                               |
| 55.98258902                              | 132.3885307                                       | -0.019456154                            | 0.077415383                               |
| 55.47043733                              | 113.0744395                                       | -0.270603412                            | 0.076988115                               |
| 61.36483902                              | 107.6802988                                       | -0.473461393                            | 0.079045765                               |
| 76.65478099                              | 108.802598                                        | -0.638367698                            | 0.078075776                               |
| 83.11840364                              | 142.2160246                                       | -0.331331025                            | 0.063389695                               |
| 67.77890919                              | 144.3161526                                       | 0.192128468                             | 0.066859282                               |
| 28.09728183                              | 120.0952377                                       | 0.422716129                             | 0.114602108                               |
| 71.55983987                              | 142.5574322                                       | -0.419497594                            | 0.064793238                               |
| 63.28489596                              | 156.8437805                                       | 0.450668645                             | 0.069179917                               |
| 83.32988721                              | 149.2560382                                       | -0.063656817                            | 0.060692905                               |
| 46.9325962                               | 131.7283154                                       | 0.26527783                              | 0.079523219                               |
| 20.59626754                              | 116.210556                                        | -0.153879155                            | 0.108672101                               |
| 53.31553166                              | 124.1710148                                       | -0.031985243                            | 0.076986626                               |
| 58.07319636                              | 145.3423138                                       | 0.407930736                             | 0.070882645                               |
| 61.88805675                              | 143.9515533                                       | 0.049119938                             | 0.067458897                               |
| 44.43772397                              | 104.5884367                                       | -0.439697346                            | 0.086022713                               |
| 52.8841313                               | 106.1177692                                       | -0.056674804                            | 0.081514216                               |
| 46.93486469                              | 117.9061909                                       | 0.04414702                              | 0.079107988                               |
| 165.1343291                              | 226.4868298                                       | -0.609713082                            | 0.046454311                               |
| 37.87942461                              | 107.3441048                                       | 0.364198388                             | 0.099158379                               |
| 52.45617401                              | 158.9608898                                       | 0.244869553                             | 0.076109267                               |
| 35.45182049                              | 109.0291748                                       | 0.566227577                             | 0.099350195                               |
| 124.3464542                              | 184.3689117                                       | -0.273697579                            | 0.051174575                               |

| log.sigma.4.5.mm.3D_firstorder_MeanAbsoluteDeviation | log.sigma.4.5.mm.3D_firstorder_Energy | log.sigma.4.5.mm.3D_firstorder_RobustMeanAbsoluteDeviation | log.sigma.4.5.mm.3D_firstorder_Median |
|------------------------------------------------------|---------------------------------------|------------------------------------------------------------|---------------------------------------|
| 107.2099193                                          | 45703051.89                           | 79.72874204                                                | 129.2425232                           |
| 82.49876016                                          | 48073986.68                           | 57.63198118                                                | 99.29100037                           |
| 85.72902749                                          | 13977621.6                            | 59.6719334                                                 | 41.94304085                           |
| 80.17488883                                          | 61035698.66                           | 55.77304034                                                | 109.4135437                           |
| 83.54500956                                          | 16010525.41                           | 60.49228219                                                | 51.39489365                           |
| 70.95330874                                          | 22972843.23                           | 45.00609659                                                | 55.75324249                           |
| 78.18006386                                          | 15539168.1                            | 61.81843724                                                | 43.64720917                           |
| 92.76270836                                          | 59044335.71                           | 64.08011826                                                | 122.7004395                           |
| 92.3722289                                           | 63914560.05                           | 68.02055632                                                | 120.6454544                           |
| 93.07212302                                          | 81557182.39                           | 64.3714865                                                 | 111.9323502                           |
| 63.33210202                                          | 29769023.09                           | 43.84887935                                                | 85.63670349                           |
| 79.1155955                                           | 34394959.72                           | 53.66564                                                   | 101.500824                            |
| 65.71098294                                          | 42681653.47                           | 43.1660514                                                 | 71.38282013                           |
| 74.01158463                                          | 28125980.8                            | 51.69048534                                                | 77.84116364                           |
| 98.79789172                                          | 44453702.44                           | 66.8602834                                                 | 93.56149673                           |
| 93.93392774                                          | 77256003.17                           | 63.67239906                                                | 61.7368927                            |
| 80.4861618                                           | 25038724.71                           | 50.96350979                                                | 66.29743958                           |
| 86.06273677                                          | 86965759.6                            | 63.14650984                                                | 134.0727615                           |
| 74.84826183                                          | 24315809.64                           | 54.32771125                                                | 113.8395729                           |
| 80.23959904                                          | 59211130.22                           | 53.79790669                                                | 88.99223328                           |
| 81.49696686                                          | 97245591.19                           | 54.57828997                                                | 59.49960709                           |
| 83.73564346                                          | 42521157.55                           | 56.87377176                                                | 84.25402832                           |
| 86.01177184                                          | 78085072.73                           | 57.52529656                                                | 70.92806244                           |
| 94.07696574                                          | 20883214.47                           | 69.19374952                                                | 64.3091774                            |
| 94.90365347                                          | 36966569.77                           | 67.18865624                                                | 39.723629                             |
| 93.03198699                                          | 40335370.87                           | 61.53453546                                                | 111.4441833                           |
| 89.80985668                                          | 44324647.6                            | 65.72881548                                                | 76.82337952                           |
| 86.46031876                                          | 56072454.27                           | 60.59694189                                                | 84.50457764                           |
| 76.99244557                                          | 65766111.38                           | 48.96466429                                                | 93.80889893                           |
| 81.74996563                                          | 60138393.37                           | 53.07347274                                                | 87.57181549                           |
| 86.81632399                                          | 91493830.81                           | 57.66904103                                                | 96.30727005                           |
| 85.39551978                                          | 150898314.3                           | 58.30985                                                   | 128.4715271                           |
| 86.8351327                                           | 62869728.2                            | 56.34996884                                                | 59.19835663                           |
| 92.31505707                                          | 12526588.21                           | 70.96363626                                                | 112.5131836                           |
| 78.23882557                                          | 12075662.25                           | 53.3345239                                                 | 55.88537598                           |
| 70.63304071                                          | 53039435.98                           | 47.88954974                                                | 82.41602325                           |
| 99.22669534                                          | 108942199.9                           | 65.56022166                                                | 116.1307755                           |
| 69.63749918                                          | 57623803.73                           | 45.87096001                                                | 91.15193176                           |
| 62.52665697                                          | 16137442.64                           | 40.66166549                                                | 53.02594948                           |
| 80.92541936                                          | 40220701.99                           | 57.9236216                                                 | 98.7611351                            |
| 71.79383993                                          | 23972047.99                           | 51.7552785                                                 | 91.92298889                           |
| 72.71441656                                          | 38853540.9                            | 52.92587222                                                | 96.43879318                           |
| 74.06225806                                          | 64851442.32                           | 53.69345112                                                | 102.216713                            |
| 81.22400448                                          | 40035398.69                           | 56.26934039                                                | 80.0257988                            |
| 95.65849337                                          | 70668873.58                           | 60.69855314                                                | 67.8696022                            |
| 85.19067705                                          | 65772724.24                           | 60.42664276                                                | 89.35555267                           |
| 87.54542388                                          | 83410086.07                           | 57.69146975                                                | 95.69247437                           |
| 73.36753599                                          | 16409116.56                           | 44.17753996                                                | 46.5976696                            |
| 77.93274261                                          | 9063537.057                           | 59.67531591                                                | 61.60245705                           |
| 86.07768698                                          | 27600690.56                           | 61.43168184                                                | 96.46959686                           |
| 77.69149248                                          | 88708977.95                           | 52.45191819                                                | 93.4735527                            |
| 55.72799594                                          | 25625126.87                           | 33.53892864                                                | 76.66300583                           |
| 86.05219831                                          | 120358204.1                           | 62.4372915                                                 | 122.8970718                           |
| 81.64418673                                          | 23107892.13                           | 57.32212042                                                | 88.22219849                           |
| 88.62352136                                          | 112249413.4                           | 63.20125105                                                | 125.560791                            |
| 96.83245963                                          | 37289585.28                           | 65.38623654                                                | 65.14424133                           |
| 89.88294568                                          | 82943492.55                           | 60.1009237                                                 | 103.8666229                           |
| 77.31046749                                          | 43017656.34                           | 50.38631259                                                | 58.1045742                            |
| 74.5121429                                           | 21736383.23                           | 49.171158                                                  | 76.72043991                           |
| 52.35433466                                          | 20333640.31                           | 35.98291161                                                | 98.98912811                           |
| 92.5408024                                           | 109691835.1                           | 69.870436                                                  | 146.1634674                           |
| 80.96523998                                          | 118599633                             | 52.94625091                                                | 94.22639465                           |
| 79.6344244                                           | 51319869.43                           | 54.15928387                                                | 107.3405685                           |
| 88.00605622                                          | 45888045.53                           | 65.63548189                                                | 117.3427429                           |
| 82.90903334                                          | 15176602.01                           | 62.7651047                                                 | 131.1544724                           |
| 96.48855156                                          | 50287445.54                           | 71.76013644                                                | 112.6553574                           |
| 98.03707221                                          | 28932682.23                           | 69.32898038                                                | 80.53637314                           |
| 96.38614701                                          | 125729352.4                           | 69.48567302                                                | 127.003212                            |
| 73.43999762                                          | 22643609.17                           | 52.22593235                                                | 87.30974579                           |
| 90.41088731                                          | 56428552.42                           | 60.60574179                                                | 83.04223633                           |
| 113.3244649                                          | 119185549.9                           | 78.40121479                                                | 120.9270172                           |
| 72.13754274                                          | 46868413.18                           | 48.03345062                                                | 99.29243469                           |
| 86.220425                                            | 135327635.1                           | 57.99669914                                                | 120.2932434                           |
| 77.19338707                                          | 131895822.7                           | 51.59665082                                                | 109.0177612                           |
| 98.56753291                                          | 127923617                             | 67.42004769                                                | 111.1119804                           |
| 93.34156081                                          | 55307406.87                           | 64.42260009                                                | 88.72575378                           |
| 67.02054673                                          | 31087936.22                           | 43.5991887                                                 | 69.78274536                           |
| 79.53074068                                          | 31088090.45                           | 55.81040179                                                | 99.78246307                           |
| 76.57076426                                          | 55814142.25                           | 48.96467042                                                | 84.90942383                           |
| 77.49328066                                          | 65019942.11                           | 47.50253007                                                | 60.60166931                           |
| 82.41738701                                          | 25944830.49                           | 47.90567205                                                | 68.6530571                            |
| 93.09382572                                          | 51205102.31                           | 60.31892854                                                | 70.0451889                            |
| 88.68361217                                          | 70368549.25                           | 60.02174154                                                | 112.6185341                           |
| 62.41009516                                          | 6389050.058                           | 48.24252272                                                | 63.19939423                           |
| 88.45706818                                          | 101802401.5                           | 59.62033375                                                | 119.3274765                           |
| 86.01453697                                          | 78540454.72                           | 63.40383663                                                | 93.28811646                           |
| 95.62635129                                          | 37620815.04                           | 63.4171251                                                 | 100.7456398                           |
| 74.33756315                                          | 63599652.73                           | 53.47284902                                                | 101.4026718                           |
| 57.82339353                                          | 7564681.732                           | 46.49311572                                                | 120.2557831                           |
| 78.32739616                                          | 10782156.22                           | 54.84264605                                                | 83.59020233                           |
| 83.94384178                                          | 93579510.13                           | 60.752804                                                  | 121.9459229                           |
| 85.20709924                                          | 25687598.45                           | 59.65477512                                                | 102.8530121                           |
| 67.68413011                                          | 15159332.92                           | 43.98222432                                                | 48.36479187                           |
| 73.83020652                                          | 73504425.75                           | 46.37373546                                                | 78.95328522                           |
| 72.12626239                                          | 122438485.4                           | 49.06744293                                                | 127.8292465                           |
| 139.2039295                                          | 27366585.84                           | 95.27433186                                                | 62.7989521                            |
| 65.4202522                                           | 26797836.77                           | 45.24314892                                                | 75.27788544                           |
| 83.01011936                                          | 11839536.57                           | 64.7021644                                                 | 128.5342789                           |
| 65.08248417                                          | 11720238.46                           | 45.6786971                                                 | 61.40489197                           |
| 116.7525663                                          | 29490510.4                            | 77.94123663                                                | 74.08115768                           |

| log.sigma.4.5.mm.3D_firstorder_TotalEnergy | log.sigma.4.5.mm.3D_firstorder_Maximum | log.sigma.4.5.mm.3D_firstorder_RootMeanSquared | log.sigma.4.5.mm.3D_firstorder_90Percentile | log.sigma.4.5.mm.3D_firstorder_Minimum |
|--------------------------------------------|----------------------------------------|------------------------------------------------|---------------------------------------------|----------------------------------------|
| 1233982401                                 | 479.459198                             | 194.9125428                                    | 320.5663574                                 | -189.1743011                           |
| 1297997640                                 | 425.2293396                            | 155.0386834                                    | 265.4071167                                 | -278.2629395                           |
| 377395783.3                                | 376.75341                              | 111.8138851                                    | 153.1987869                                 | -300.0209351                           |
| 1647963864                                 | 466.6896973                            | 157.7404902                                    | 269.0125305                                 | -146.3869019                           |
| 432284186                                  | 330.4551697                            | 129.8881963                                    | 238.9299957                                 | -158.1827545                           |
| 620266767.3                                | 373.3007507                            | 118.4269176                                    | 220.9579636                                 | -174.6829376                           |
| 419557538.8                                | 313.2479858                            | 121.248504                                     | 218.7496857                                 | -80.18283081                           |
| 1594197064                                 | 513.1928101                            | 180.8633278                                    | 300.2508057                                 | -259.6239929                           |
| 1725693121                                 | 484.1246338                            | 177.5714036                                    | 294.3362793                                 | -181.5777283                           |
| 2202043925                                 | 465.9420471                            | 164.7985707                                    | 264.7732971                                 | -461.6306152                           |
| 803763623.4                                | 329.6294556                            | 128.3521699                                    | 223.5848969                                 | -129.5970459                           |
| 928663912.5                                | 428.8523865                            | 142.8721072                                    | 232.1460846                                 | -262.6592102                           |
| 1152404644                                 | 381.4482422                            | 120.7149147                                    | 205.4799744                                 | -200.1195374                           |
| 759401481.7                                | 338.5384827                            | 123.0356543                                    | 206.3528275                                 | -167.7284851                           |
| 1200249966                                 | 508.7695923                            | 169.4605029                                    | 286.571283                                  | -243.0021515                           |
| 2085912086                                 | 427.21875                              | 173.1191295                                    | 224.282019                                  | -372.4768982                           |
| 676045567.1                                | 392.4682922                            | 124.9017675                                    | 195.2026306                                 | -375.7919312                           |
| 2348075509                                 | 545.2633057                            | 184.3842738                                    | 289.0713348                                 | -218.0897522                           |
| 656526860.4                                | 364.5314636                            | 146.3036637                                    | 233.1867294                                 | -256.1541443                           |
| 1598700516                                 | 411.2175293                            | 142.8656466                                    | 241.9408875                                 | -247.6917725                           |
| 2625630962                                 | 481.6154175                            | 118.2885091                                    | 180.419017                                  | -385.6148376                           |
| 1148071254                                 | 560.5811768                            | 141.5898772                                    | 232.4201813                                 | -313.8063354                           |
| 2108296964                                 | 476.6466064                            | 137.6520559                                    | 234.3078613                                 | -214.5095825                           |
| 563846790.7                                | 348.5715332                            | 142.3901875                                    | 245.604007                                  | -313.8170471                           |
| 998097383.7                                | 300.7848816                            | 119.1472674                                    | 165.1375534                                 | -284.6443481                           |
| 1089055014                                 | 475.2451477                            | 172.7247932                                    | 284.4107635                                 | -279.6371765                           |
| 1196765485                                 | 400.1138                               | 141.5885957                                    | 499.6465759                                 | -237.0319214                           |
| 1513956265                                 | 381.1372681                            | 129.2791597                                    | 198.2710938                                 | -297.8055725                           |
| 1775685007                                 | 420.6773071                            | 139.0994778                                    | 221.2110992                                 | -343.3890076                           |
| 1623736621                                 | 551.1885986                            | 137.9752208                                    | 217.5617371                                 | -393.4112549                           |
| 2470333432                                 | 394.3282471                            | 148.6246547                                    | 240.8267715                                 | -359.4608459                           |
| 4074254485                                 | 520.0289307                            | 173.7229485                                    | 276.7375122                                 | -299.9740601                           |
| 1697482661                                 | 431.45401                              | 157.6067156                                    | 261.2070007                                 | -466.2998352                           |
| 338217881.6                                | 390.5213013                            | 161.3778266                                    | 268.680481                                  | -164.7341309                           |
| 326042880.6                                | 309.8855896                            | 116.6135444                                    | 193.8623215                                 | -219.0653992                           |
| 1432064772                                 | 369.2380981                            | 128.4026297                                    | 218.4876465                                 | -258.0314331                           |
| 2941439398                                 | 534.8813477                            | 174.7128292                                    | 294.7128601                                 | -375.5905762                           |
| 1555842701                                 | 356.3572388                            | 130.3578132                                    | 212.5817108                                 | -280.6392822                           |
| 435710951.3                                | 335.0706787                            | 104.2798518                                    | 184.580954                                  | -240.1103821                           |
| 1085958954                                 | 429.4807129                            | 156.795348                                     | 268.1877747                                 | -114.8531113                           |
| 647245295.7                                | 343.2867737                            | 134.966077                                     | 227.6754761                                 | -159.7125397                           |
| 1049045604                                 | 379.8718567                            | 141.8115948                                    | 239.4182785                                 | -161.3981628                           |
| 1750988943                                 | 378.6881714                            | 146.3705178                                    | 246.2042236                                 | -262.6759949                           |
| 1080955765                                 | 424.3314819                            | 145.7745232                                    | 258.3564148                                 | -163.8084869                           |
| 1908059587                                 | 426.9166565                            | 142.2173671                                    | 221.7371536                                 | -424.7333069                           |
| 1775863555                                 | 401.3068237                            | 135.6390977                                    | 220.9336334                                 | -214.8862                              |
| 2252072324                                 | 490.526886                             | 150.4290176                                    | 242.7597275                                 | -365.6493225                           |
| 443046147.1                                | 318.0700378                            | 104.0382406                                    | 126.7014008                                 | -372.4957275                           |
| 244715500.5                                | 299.5419922                            | 126.7679027                                    | 232.4403305                                 | -99.53375244                           |
| 745218645.1                                | 470.922821                             | 159.1280442                                    | 268.3417358                                 | -190.1766815                           |
| 2395142405                                 | 445.2599487                            | 149.2189992                                    | 257.8487335                                 | -312.4914856                           |
| 691878425.6                                | 334.9941406                            | 114.4586415                                    | 185.9896698                                 | -285.13974                             |
| 3249671511                                 | 511.7883911                            | 178.0399858                                    | 300.0721069                                 | -179.3765259                           |
| 623913087.4                                | 361.9417114                            | 140.475866                                     | 242.2378235                                 | -376.902832                            |
| 3030734161                                 | 429.7220764                            | 168.8532144                                    | 275.3454773                                 | -260.4873352                           |
| 1006818803                                 | 449.6275024                            | 140.5376806                                    | 222.1180328                                 | -347.7894287                           |
| 2239474299                                 | 468.3968506                            | 159.0451576                                    | 251.84776                                   | -413.6183472                           |
| 1161476721                                 | 467.0596924                            | 132.9969212                                    | 241.0464935                                 | -217.6643982                           |
| 586882347.1                                | 331.2854309                            | 125.8683634                                    | 216.2524948                                 | -299.6166992                           |
| 549008288.3                                | 271.2592773                            | 120.3010468                                    | 183.6112549                                 | -165.9358826                           |
| 2961679547                                 | 454.6721802                            | 193.1255078                                    | 315.1946716                                 | -183.1508636                           |
| 3202190091                                 | 536.1015625                            | 147.0192465                                    | 244.5658905                                 | -377.2096558                           |
| 1385636474                                 | 434.1564941                            | 150.3260355                                    | 234.4789124                                 | -297.4569702                           |
| 1238977229                                 | 349.8392029                            | 156.733324                                     | 248.5916992                                 | -200.2140198                           |
| 409768254.3                                | 360.9482117                            | 160.3840835                                    | 247.9003876                                 | -176.7023773                           |
| 1357761030                                 | 508.7153931                            | 180.5289369                                    | 300.7292969                                 | -141.0582428                           |
| 781182420.2                                | 492.2850952                            | 165.3680155                                    | 292.6151917                                 | -155.6507416                           |
| 3394692515                                 | 478.0354309                            | 187.7706328                                    | 319.8089752                                 | -188.2088623                           |
| 611377447.5                                | 319.6350708                            | 132.3346468                                    | 228.324176                                  | -244.5092621                           |
| 1523570915                                 | 455.8796082                            | 150.0279889                                    | 255.1203918                                 | -370.3500977                           |
| 3218009846                                 | 479.0710449                            | 176.9144605                                    | 277.5491394                                 | -343.656311                            |
| 1265447156                                 | 401.0619202                            | 150.7999262                                    | 261.986145                                  | -208.3134308                           |
| 3653846149                                 | 517.7772827                            | 170.0656971                                    | 275.0879028                                 | -312.1151123                           |
| 3561187214                                 | 443.1529541                            | 142.3284347                                    | 223.052475                                  | -336.5160828                           |
| 3453937659                                 | 663.446228                             | 173.2481647                                    | 281.865036                                  | -307.7500305                           |
| 1493299986                                 | 568.0654907                            | 154.0353897                                    | 247.429184                                  | -316.3577271                           |
| 839374278                                  | 385.640625                             | 114.8948309                                    | 185.3227051                                 | -287.0529785                           |
| 839378442.2                                | 359.7559509                            | 151.2471832                                    | 257.0130554                                 | -228.6284485                           |
| 1506981841                                 | 402.9491882                            | 130.5269472                                    | 202.9831619                                 | -341.7380066                           |
| 1755538437                                 | 382.2661743                            | 120.8361673                                    | 183.5297638                                 | -384.2154236                           |
| 700510423.3                                | 466.7802734                            | 138.0183608                                    | 206.7615387                                 | -556.1010742                           |
| 1382537762                                 | 458.9469604                            | 138.8228135                                    | 208.7992889                                 | -414.9472961                           |
| 1899950830                                 | 516.2463379                            | 168.651206                                     | 284.5004822                                 | -339.9477539                           |
| 172504351.6                                | 256.4765015                            | 110.5267248                                    | 190.6082153                                 | -115.5737                              |
| 2748664839                                 | 445.6204224                            | 162.3576949                                    | 257.4197235                                 | -303.7266541                           |
| 2120592277                                 | 452.831665                             | 150.3598205                                    | 257.8631897                                 | -138.9308929                           |
| 1015762006                                 | 455.2728577                            | 162.3117635                                    | 266.8612335                                 | -303.4648438                           |
| 1717190624                                 | 376.6848145                            | 144.5694058                                    | 245.4972839                                 | -173.0685272                           |
| 204246406.8                                | 232.7720337                            | 135.6670618                                    | 206.717392                                  | -55.2414093                            |
| 291118218                                  | 301.7399902                            | 136.5805605                                    | 229.6249023                                 | -170.6187897                           |
| 2526646774                                 | 483.315094                             | 170.7144294                                    | 286.7289124                                 | -263.1173096                           |
| 693565158.1                                | 376.3678284                            | 152.4686703                                    | 261.841571                                  | -205.6701355                           |
| 409301988.9                                | 275.6375427                            | 98.51435782                                    | 148.1334564                                 | -296.4422302                           |
| 1984619495                                 | 392.5576172                            | 129.945849                                     | 213.190509                                  | -355.0616455                           |
| 3305839105                                 | 437.4032898                            | 161.2994969                                    | 254.4451218                                 | -167.9047089                           |
| 738897817.8                                | 440.4220886                            | 175.9479363                                    | 213.8666962                                 | -505.7550659                           |
| 723541592.7                                | 326.81073                              | 123.2888247                                    | 216.2856262                                 | -234.6962738                           |
| 319667487.5                                | 368.3713379                            | 166.3203795                                    | 272.2542114                                 | -73.28664398                           |
| 316446438.3                                | 305.6477966                            | 114.88458                                      | 205.4844696                                 | -112.3780441                           |
| 796243780.8                                | 450.4569397                            | 159.8594226                                    | 227.4742661                                 | -363.9634705                           |

| log.sigma.4.5.mm.3D_firstorder_Entropy | log.sigma.4.5.mm.3D_firstorder_StandardDeviation | log.sigma.4.5.mm.3D_firstorder_Range | log.sigma.4.5.mm.3D_firstorder_Variance | log.sigma.4.5.mm.3D_firstorder_10Percentile |
|----------------------------------------|--------------------------------------------------|--------------------------------------|-----------------------------------------|---------------------------------------------|
| 4.346269094                            | 127.930534                                       | 668.6334991                          | 16366.2265                              | -4.171365499                                |
| 4.026943577                            | 103.906205                                       | 703.4922791                          | 10796.49944                             | 3.419018459                                 |
| 4.090634466                            | 108.1320345                                      | 676.774353                           | 11692.5369                              | -126.4264885                                |
| 4.000093061                            | 100.3897801                                      | 613.0765991                          | 10078.10796                             | 5.44810524                                  |
| 3.83757572                             | 100.7018198                                      | 488.6379242                          | 10140.85651                             | -20.86977615                                |
| 3.798633749                            | 93.32072808                                      | 547.9836884                          | 8708.758289                             | -30.50253525                                |
| 3.491592337                            | 89.0812708                                       | 393.4308167                          | 7935.472807                             | -8.769769859                                |
| 4.230394967                            | 117.1802803                                      | 772.816803                           | 13731.21809                             | 9.218829918                                 |
| 4.128924977                            | 111.5572592                                      | 665.7023621                          | 12445.02208                             | 12.29649868                                 |
| 4.262611552                            | 118.3274769                                      | 927.5726624                          | 14001.39179                             | -34.00903625                                |
| 3.635095641                            | 79.58224128                                      | 459.2265015                          | 6333.333128                             | 11.65187738                                 |
| 4.048220572                            | 101.1070183                                      | 691.5115967                          | 10222.62915                             | -23.16182747                                |
| 3.742530548                            | 85.14435061                                      | 581.5677795                          | 7249.560441                             | -8.899749947                                |
| 3.920047419                            | 92.87683622                                      | 506.2669678                          | 8626.106706                             | -41.64564514                                |
| 4.280870222                            | 125.0626019                                      | 751.7717438                          | 15640.65439                             | -24.65931835                                |
| 4.250620614                            | 119.5951271                                      | 799.6956482                          | 14302.99442                             | -67.9405304                                 |
| 4.103764877                            | 107.8948094                                      | 768.2602234                          | 11641.28989                             | -70.41678619                                |
| 4.03203458                             | 104.7905546                                      | 763.3530579                          | 10981.06033                             | 33.49044342                                 |
| 3.894130991                            | 92.14722042                                      | 620.6856079                          | 8491.110231                             | 2.028494954                                 |
| 4.041349336                            | 103.7648886                                      | 658.9093018                          | 10767.15211                             | -17.50611687                                |
| 4.101763028                            | 105.622566                                       | 867.2302551                          | 11156.12646                             | -83.00171051                                |
| 4.127962585                            | 107.8708336                                      | 874.3875122                          | 11636.11674                             | -37.94635773                                |
| 4.163051355                            | 111.3144948                                      | 791.156189                           | 12390.91675                             | -52.24151993                                |
| 4.12937874                             | 114.0358575                                      | 562.3885803                          | 13004.17679                             | -54.60335922                                |
| 4.207440933                            | 116.9496384                                      | 585.4292297                          | 13677.21791                             | -151.9078247                                |
| 4.262237604                            | 120.5739394                                      | 754.8823242                          | 14538.07486                             | -10.76197844                                |
| 4.114271527                            | 109.5417497                                      | 637.1457214                          | 11999.39493                             | -38.76651382                                |
| 4.12841981                             | 107.8809881                                      | 678.9428406                          | 11638.3076                              | -73.27537842                                |
| 4.015791274                            | 103.3488758                                      | 764.0663147                          | 10680.99014                             | -14.65491447                                |
| 4.122212179                            | 107.71479                                        | 944.5998535                          | 11602.47599                             | -48.28620453                                |
| 4.180198411                            | 113.0395331                                      | 753.789093                           | 12777.93604                             | -38.7901783                                 |
| 4.149923819                            | 109.7846374                                      | 820.0029907                          | 12052.6666                              | 10.55399113                                 |
| 4.142940331                            | 117.5771806                                      | 897.7538452                          | 13824.3934                              | -10.29020119                                |
| 4.038401785                            | 108.2768081                                      | 555.2554321                          | 11723.86718                             | -3.10487175                                 |
| 3.981072026                            | 98.73528305                                      | 528.9509888                          | 9748.65612                              | -67.03862381                                |
| 3.866056192                            | 90.21890251                                      | 627.2695313                          | 8139.45037                              | -13.71364326                                |
| 4.384299059                            | 129.7028356                                      | 910.4719238                          | 16822.82556                             | -37.40752563                                |
| 3.874933437                            | 90.98172242                                      | 636.996521                           | 8277.673814                             | -15.76907539                                |
| 3.677101657                            | 81.73880788                                      | 575.1810608                          | 6681.232713                             | -24.10300388                                |
| 3.884809662                            | 98.96415427                                      | 544.3338242                          | 9793.903831                             | 17.19692135                                 |
| 3.815462624                            | 88.15035486                                      | 502.9993134                          | 7770.485061                             | -2.227361441                                |
| 3.810907352                            | 88.28434122                                      | 541.2700195                          | 7794.124905                             | 9.090358829                                 |
| 3.831155502                            | 91.28278286                                      | 641.3641663                          | 8332.546446                             | 13.80722294                                 |
| 3.917870631                            | 101.044556                                       | 588.1399689                          | 10210.0023                              | -0.075228157                                |
| 4.325412352                            | 127.522942                                       | 851.6499634                          | 16262.10074                             | -102.955343                                 |
| 4.118671595                            | 105.6082828                                      | 616.1930237                          | 11153.10939                             | -56.08203278                                |
| 4.215543083                            | 114.7730558                                      | 856.1762085                          | 13172.85433                             | -37.0487442                                 |
| 3.863851313                            | 99.98913608                                      | 690.5657654                          | 9997.827334                             | -106.4958801                                |
| 3.712422687                            | 91.66820976                                      | 399.0757446                          | 8403.060681                             | -14.56298532                                |
| 4.018873447                            | 106.121724                                       | 661.0995026                          | 11261.82031                             | 5.090171623                                 |
| 3.952086032                            | 99.92589819                                      | 757.7514343                          | 9985.185128                             | 8.817609406                                 |
| 3.532060043                            | 77.75472885                                      | 620.1338806                          | 6045.797858                             | 9.985962391                                 |
| 4.031240145                            | 104.8573054                                      | 691.164917                           | 10995.05449                             | 26.87390366                                 |
| 4.033270528                            | 102.496955                                       | 738.8445435                          | 10505.62579                             | -16.32401657                                |
| 4.165320055                            | 109.4766223                                      | 690.2094116                          | 11985.13082                             | -5.448956299                                |
| 4.336751445                            | 124.1493385                                      | 797.4169312                          | 15413.05826                             | -95.74315109                                |
| 4.221881228                            | 117.7783078                                      | 882.0151978                          | 13871.72979                             | -20.98381042                                |
| 3.791518474                            | 99.75093748                                      | 684.7240906                          | 9950.249529                             | -0.473054272                                |
| 3.949695581                            | 97.29845234                                      | 630.9021301                          | 9466.988827                             | -31.05258751                                |
| 3.440515269                            | 66.50532646                                      | 437.1951599                          | 4422.958447                             | 17.58620033                                 |
| 4.122592926                            | 110.1521885                                      | 637.8230438                          | 12133.50462                             | 26.35171509                                 |
| 4.08186445                             | 107.0727558                                      | 913.3112183                          | 11464.57503                             | -15.23499985                                |
| 4.047354742                            | 101.8930136                                      | 731.6134644                          | 10382.18621                             | -11.35969925                                |
| 4.076979163                            | 105.5963848                                      | 550.0532227                          | 11150.59648                             | -24.53813782                                |
| 3.958088042                            | 98.18684621                                      | 537.650589                           | 9640.656768                             | 0.0683855                                   |
| 4.132548141                            | 115.7598394                                      | 649.7736359                          | 13400.34041                             | 7.602234364                                 |
| 4.142894393                            | 120.363838                                       | 647.9358368                          | 14487.45349                             | -14.42678814                                |
| 4.215516309                            | 118.2198384                                      | 666.2442932                          | 13975.93018                             | 9.920064449                                 |
| 3.872396085                            | 91.32511192                                      | 564.1443329                          | 8340.276068                             | -14.6098259                                 |
| 4.220514938                            | 116.5724247                                      | 826.2297058                          | 13589.13021                             | -41.02689819                                |
| 4.504121492                            | 142.7633832                                      | 822.727356                           | 20381.38358                             | -95.21902847                                |
| 3.794379418                            | 92.36194796                                      | 609.375351                           | 8530.729431                             | 23.90832901                                 |
| 4.154943641                            | 112.1831634                                      | 829.892395                           | 12585.06215                             | 7.077593327                                 |
| 4.015501156                            | 99.73981217                                      | 779.6690369                          | 9948.030132                             | -29.52472878                                |
| 4.354918402                            | 125.6941032                                      | 971.1962585                          | 15799.00758                             | -28.45188065                                |
| 4.234388703                            | 118.6625481                                      | 884.4232178                          | 14080.80032                             | -35.40486526                                |
| 3.811049703                            | 88.28631874                                      | 672.6936035                          | 7794.474076                             | -22.61790314                                |
| 3.957424312                            | 99.96054337                                      | 588.3843994                          | 9992.110231                             | 9.637925911                                 |
| 4.026497318                            | 101.4728682                                      | 744.6871948                          | 10296.74298                             | -47.10151291                                |
| 4.045842056                            | 105.9020584                                      | 766.4815979                          | 11215.24597                             | -70.50503235                                |
| 4.126798428                            | 118.9767692                                      | 1022.881348                          | 14155.47162                             | -48.28255119                                |
| 4.30260015                             | 122.9068494                                      | 873.8942566                          | 15106.09363                             | -94.92221069                                |
| 4.189711364                            | 113.9703106                                      | 856.1940918                          | 12989.23169                             | -2.438681221                                |
| 3.36932335                             | 72.58254024                                      | 372.0502014                          | 5268.225148                             | 7.290597534                                 |
| 4.208850643                            | 114.1231516                                      | 749.3470764                          | 13024.09374                             | -28.97489567                                |
| 4.038207414                            | 104.158232                                       | 591.762558                           | 10848.93729                             | -12.90442085                                |
| 4.324360911                            | 123.9088113                                      | 758.7377014                          | 15353.39352                             | -51.35581779                                |
| 3.868718099                            | 91.81666534                                      | 549.7533417                          | 8357.372737                             | 6.37355032                                  |
| 3.291481558                            | 66.66692583                                      | 288.013443                           | 4444.479                                | 27.8412056                                  |
| 3.930990296                            | 97.78747903                                      | 472.3587799                          | 9562.391056                             | -27.53673916                                |
| 4.027850514                            | 103.1093245                                      | 746.4324036                          | 10631.5328                              | 16.0631237                                  |
| 4.10534041                             | 106.8995993                                      | 582.0379639                          | 11427.52432                             | -22.60813522                                |
| 3.835178501                            | 88.84025205                                      | 572.0797729                          | 7892.590385                             | -69.74468689                                |
| 3.975103191                            | 99.30921759                                      | 747.6192627                          | 9862.320698                             | -27.18882256                                |
| 3.915255467                            | 92.01149726                                      | 605.3079987                          | 8466.115629                             | 22.41637039                                 |
| 4.722747393                            | 174.2765858                                      | 946.1771545                          | 30372.32837                             | -207.455719                                 |
| 3.644747156                            | 82.62767205                                      | 561.5070038                          | 6827.332188                             | 4.405003071                                 |
| 3.867833582                            | 96.72647665                                      | 441.6579819                          | 9356.011286                             | 18.5790266                                  |
| 3.599662551                            | 80.30665595                                      | 418.0258408                          | 6449.15899                              | -7.529152489                                |
| 4.572651552                            | 149.6760009                                      | 814.4204102                          | 22402.90525                             | -150.3348251                                |

| log.sigma.4.5.mm.3D_firstorder_Kurtosis | log.sigma.4.5.mm.3D_firstorder_Mean | log.sigma.4.5.mm.3D_glrIm_ShortRunLowGrayLevelEmphasis | log.sigma.4.5.mm.3D_glrIm_GrayLevelVariance |
|-----------------------------------------|-------------------------------------|--------------------------------------------------------|---------------------------------------------|
| 2.444267315                             | 147.0532992                         | 0.01021201                                             | 26.87311361                                 |
| 3.326191563                             | 115.067345                          | 0.004951932                                            | 17.84677326                                 |
| 3.117614068                             | 28.45712582                         | 0.008203983                                            | 19.18702434                                 |
| 2.901235499                             | 121.6715015                         | 0.012617312                                            | 16.63847354                                 |
| 2.514078076                             | 82.03710758                         | 0.015567782                                            | 17.22196835                                 |
| 3.399770774                             | 72.91211511                         | 0.014382945                                            | 14.56222187                                 |
| 2.092834343                             | 82.25403888                         | 0.024750922                                            | 13.12685216                                 |
| 3.240044288                             | 137.7691012                         | 0.00546383                                             | 22.80014513                                 |
| 2.596632801                             | 138.1541939                         | 0.007447538                                            | 20.37255594                                 |
| 3.619014657                             | 114.7047388                         | 0.002360108                                            | 23.13054231                                 |
| 2.84473475                              | 100.7022661                         | 0.011860429                                            | 10.59000376                                 |
| 3.390696771                             | 100.944588                          | 0.00675497                                             | 16.99096751                                 |
| 3.556641534                             | 85.57178388                         | 0.007287968                                            | 12.53366355                                 |
| 2.710844554                             | 80.69489156                         | 0.01902379                                             | 14.20751339                                 |
| 3.335838758                             | 114.3512468                         | 0.006957159                                            | 25.90784935                                 |
| 3.343221083                             | 67.07206019                         | 0.005018912                                            | 24.05837357                                 |
| 4.203263949                             | 62.92186935                         | 0.00453754                                             | 19.85896285                                 |
| 3.10489208                              | 151.7118984                         | 0.005171877                                            | 17.90803871                                 |
| 3.038426554                             | 116.3382496                         | 0.00548905                                             | 13.95719598                                 |
| 3.379821181                             | 98.20102275                         | 0.009783098                                            | 18.08576623                                 |
| 3.60825165                              | 53.25452973                         | 0.003684671                                            | 18.55225126                                 |
| 3.731795745                             | 91.71464762                         | 0.004764244                                            | 19.35766329                                 |
| 3.378507821                             | 80.97636544                         | 0.005216554                                            | 20.47562875                                 |
| 2.410623419                             | 85.26891998                         | 0.013595749                                            | 21.35285733                                 |
| 2.612885418                             | 22.77835428                         | 0.013588861                                            | 21.85489217                                 |
| 3.505738197                             | 123.6761066                         | 0.005433936                                            | 24.26182534                                 |
| 2.57608559                              | 89.71028656                         | 0.007702522                                            | 19.47573477                                 |
| 2.997091726                             | 71.23758506                         | 0.007505855                                            | 18.99854137                                 |
| 4.487253062                             | 93.10034684                         | 0.00488803                                             | 18.04706157                                 |
| 3.937699305                             | 86.22462276                         | 0.003406052                                            | 19.71860495                                 |
| 3.624943789                             | 96.49534671                         | 0.003674079                                            | 21.15125299                                 |
| 3.762234265                             | 134.6365339                         | 0.005104989                                            | 19.89026118                                 |
| 5.428624956                             | 104.9546731                         | 0.002976311                                            | 23.28607328                                 |
| 2.279303148                             | 119.6617556                         | 0.014485775                                            | 19.06399556                                 |
| 2.842644187                             | 62.04887288                         | 0.015475209                                            | 16.31759921                                 |
| 3.263292225                             | 91.36621332                         | 0.005672918                                            | 13.62190177                                 |
| 3.59279057                              | 117.0544623                         | 0.003358214                                            | 27.95014872                                 |
| 3.689932328                             | 93.3567654                          | 0.005332587                                            | 13.97896379                                 |
| 3.591302151                             | 64.75380128                         | 0.00767421                                             | 11.59074839                                 |
| 2.709170005                             | 121.6177509                         | 0.015352631                                            | 16.37159989                                 |
| 2.64088377                              | 102.2025287                         | 0.012393097                                            | 12.86200587                                 |
| 2.656544342                             | 110.9792932                         | 0.009127878                                            | 12.90454659                                 |
| 3.033150029                             | 114.4193255                         | 0.005078423                                            | 13.71064473                                 |
| 2.993479396                             | 105.0724004                         | 0.012183556                                            | 17.13066379                                 |
| 3.663398008                             | 62.95775378                         | 0.00408888                                             | 27.79164494                                 |
| 2.72684498                              | 85.11671654                         | 0.011516911                                            | 17.9838028                                  |
| 3.917496689                             | 97.24214621                         | 0.004172513                                            | 21.98983135                                 |
| 4.628034136                             | 28.7424456                          | 0.008041734                                            | 17.21566148                                 |
| 2.137289513                             | 87.5616382                          | 0.037416886                                            | 13.50597591                                 |
| 3.113428952                             | 118.5745089                         | 0.008109206                                            | 18.82777061                                 |
| 3.592211579                             | 110.8202355                         | 0.004260964                                            | 16.97542929                                 |
| 5.385062738                             | 83.99394473                         | 0.005273541                                            | 10.63068271                                 |
| 2.705066011                             | 143.8860036                         | 0.006245985                                            | 18.15717997                                 |
| 3.373280804                             | 96.06166327                         | 0.003583266                                            | 17.18243656                                 |
| 2.836661485                             | 128.5545689                         | 0.004980628                                            | 19.67987924                                 |
| 3.121332612                             | 65.86183573                         | 0.005425323                                            | 25.35049929                                 |
| 4.442499226                             | 106.881394                          | 0.003596493                                            | 23.25562718                                 |
| 3.974522404                             | 87.96551331                         | 0.007461164                                            | 17.35639848                                 |
| 3.576812015                             | 79.84895798                         | 0.0068938                                              | 15.69941242                                 |
| 3.295221662                             | 100.2466129                         | 0.0103505                                              | 7.488521672                                 |
| 2.342380703                             | 158.6315138                         | 0.006071235                                            | 19.80352107                                 |
| 4.168981431                             | 100.7476243                         | 0.003116977                                            | 19.32416505                                 |
| 3.610263389                             | 110.524797                          | 0.005153542                                            | 17.3162766                                  |
| 2.414719601                             | 115.8220116                         | 0.00816333                                             | 17.93304771                                 |
| 2.437847216                             | 126.8163928                         | 0.009228711                                            | 15.84271415                                 |
| 2.650756519                             | 138.5292627                         | 0.01170441                                             | 21.77038787                                 |
| 2.976222518                             | 113.3980911                         | 0.011763571                                            | 24.08890339                                 |
| 2.528276641                             | 145.8831052                         | 0.007477717                                            | 22.89408899                                 |
| 2.815154681                             | 95.77151291                         | 0.006890309                                            | 13.62190551                                 |
| 3.346094613                             | 94.44187231                         | 0.00381226                                             | 22.55446319                                 |
| 2.899132395                             | 104.4860888                         | 0.005721355                                            | 32.91527391                                 |
| 3.33498793                              | 119.2052361                         | 0.006292022                                            | 14.4774597                                  |
| 4.00528796                              | 127.8173666                         | 0.004410582                                            | 20.81870404                                 |
| 3.511848247                             | 101.534985                          | 0.003596795                                            | 16.34350852                                 |
| 3.474145005                             | 119.2305288                         | 0.004449735                                            | 26.0543548                                  |
| 3.644617639                             | 98.21456592                         | 0.005963991                                            | 23.41492334                                 |
| 3.97992532                              | 73.52787293                         | 0.005841767                                            | 13.448061                                   |
| 3.18527899                              | 113.5059478                         | 0.00717205                                             | 16.37953462                                 |
| 3.727122849                             | 82.10079768                         | 0.004223998                                            | 17.25255795                                 |
| 4.196894639                             | 58.19049192                         | 0.003826091                                            | 19.12273796                                 |
| 6.18649097                              | 69.95424424                         | 0.002514558                                            | 24.36926203                                 |
| 3.794781567                             | 64.54207862                         | 0.004140901                                            | 25.14146936                                 |
| 3.505768739                             | 124.3141086                         | 0.003657507                                            | 21.48439666                                 |
| 2.214249716                             | 83.35425455                         | 0.018153161                                            | 8.694580547                                 |
| 3.545000673                             | 115.4812857                         | 0.005239057                                            | 21.30178451                                 |
| 2.592617036                             | 108.4395607                         | 0.0141821                                              | 17.65740304                                 |
| 3.205858849                             | 104.8413804                         | 0.005353433                                            | 25.48361695                                 |
| 2.620787856                             | 111.995271                          | 0.009962169                                            | 13.77888429                                 |
| 1.915327324                             | 118.1569831                         | 0.023814838                                            | 6.9560375                                   |
| 2.755252436                             | 95.35123734                         | 0.020318836                                            | 15.65097098                                 |
| 2.732023144                             | 136.0583831                         | 0.004170493                                            | 17.43898753                                 |
| 2.752420752                             | 108.7160113                         | 0.011573444                                            | 18.82517186                                 |
| 3.696627431                             | 42.57332864                         | 0.008238661                                            | 13.16397055                                 |
| 4.012063957                             | 83.8069387                          | 0.003454987                                            | 16.68363056                                 |
| 3.154036607                             | 132.4817424                         | 0.009705931                                            | 14.00513138                                 |
| 3.209977162                             | 24.19396454                         | 0.00733111                                             | 49.44291862                                 |
| 3.134157096                             | 91.50301695                         | 0.006190919                                            | 11.47815363                                 |
| 2.073018692                             | 135.3013575                         | 0.027458292                                            | 14.72993308                                 |
| 2.695890842                             | 82.15417055                         | 0.018558301                                            | 10.92582335                                 |
| 3.077007334                             | 56.14383103                         | 0.009625116                                            | 36.36864738                                 |

| log.sigma.4.5.mm.3D_glrIm_LowGrayLevelRunEmphasis | log.sigma.4.5.mm.3D_glrIm_GrayLevelNonUniformityNormalized | log.sigma.4.5.mm.3D_glrIm_RunVariance | log.sigma.4.5.mm.3D_glrIm_GrayLevelNonUniformity |
|---------------------------------------------------|------------------------------------------------------------|---------------------------------------|--------------------------------------------------|
| 0.010956609                                       | 0.054614535                                                | 0.162388965                           | 58.55884001                                      |
| 0.005360616                                       | 0.071805912                                                | 0.184239003                           | 126.1677132                                      |
| 0.008688723                                       | 0.06870552                                                 | 0.138415915                           | 69.05035239                                      |
| 0.013745504                                       | 0.071782417                                                | 0.19019181                            | 154.5323921                                      |
| 0.017376604                                       | 0.079835362                                                | 0.25138985                            | 64.04051863                                      |
| 0.015923955                                       | 0.087326229                                                | 0.228046406                           | 122.2004682                                      |
| 0.030194588                                       | 0.096535372                                                | 0.409570537                           | 80.57703414                                      |
| 0.005906631                                       | 0.062349114                                                | 0.198029458                           | 98.37855703                                      |
| 0.008054037                                       | 0.06420755                                                 | 0.186485021                           | 115.0097519                                      |
| 0.002512464                                       | 0.060248936                                                | 0.145722515                           | 162.132568                                       |
| 0.013348305                                       | 0.092600945                                                | 0.275948426                           | 140.1450782                                      |
| 0.007209448                                       | 0.070862589                                                | 0.154480977                           | 106.7948057                                      |
| 0.008208435                                       | 0.087692941                                                | 0.327072576                           | 212.5113548                                      |
| 0.020476911                                       | 0.075049142                                                | 0.16316731                            | 123.5987643                                      |
| 0.007461253                                       | 0.060471757                                                | 0.178098929                           | 82.80335003                                      |
| 0.005585275                                       | 0.060860016                                                | 0.294548164                           | 214.1874325                                      |
| 0.004814594                                       | 0.070481769                                                | 0.196632508                           | 99.23726091                                      |
| 0.005766479                                       | 0.06950868                                                 | 0.273060316                           | 151.4002793                                      |
| 0.005849009                                       | 0.076513104                                                | 0.152356096                           | 77.72926026                                      |
| 0.010791426                                       | 0.071943071                                                | 0.215761754                           | 180.2539166                                      |
| 0.004000368                                       | 0.069462958                                                | 0.184778977                           | 422.4425432                                      |
| 0.005141372                                       | 0.06775213                                                 | 0.194978683                           | 126.2114966                                      |
| 0.005653402                                       | 0.066326695                                                | 0.165367056                           | 241.819305                                       |
| 0.014597503                                       | 0.063843001                                                | 0.196938729                           | 58.16481168                                      |
| 0.014624683                                       | 0.061458415                                                | 0.145536496                           | 143.6484191                                      |
| 0.005749032                                       | 0.062230119                                                | 0.158896957                           | 75.63347125                                      |
| 0.008198471                                       | 0.065433827                                                | 0.149934786                           | 129.8339556                                      |
| 0.008010286                                       | 0.066079494                                                | 0.129929089                           | 200.9500733                                      |
| 0.005220467                                       | 0.075611098                                                | 0.222219289                           | 225.2873258                                      |
| 0.003631562                                       | 0.068796174                                                | 0.182885513                           | 192.1575472                                      |
| 0.003966434                                       | 0.065380047                                                | 0.175550853                           | 237.8954179                                      |
| 0.005578493                                       | 0.066726693                                                | 0.183381841                           | 294.0213038                                      |
| 0.003217136                                       | 0.068958029                                                | 0.211484105                           | 151.2871216                                      |
| 0.015663877                                       | 0.0667522                                                  | 0.192613722                           | 28.02412059                                      |
| 0.016509651                                       | 0.072420091                                                | 0.175287821                           | 56.4081538                                       |
| 0.006188841                                       | 0.080028604                                                | 0.229227142                           | 222.8037935                                      |
| 0.003566911                                       | 0.057409187                                                | 0.150509359                           | 184.155381                                       |
| 0.005783248                                       | 0.080535383                                                | 0.206710027                           | 236.4392167                                      |
| 0.008617748                                       | 0.093391202                                                | 0.354654672                           | 114.1086719                                      |
| 0.017173267                                       | 0.077388382                                                | 0.263911434                           | 106.952053                                       |
| 0.013306272                                       | 0.079731207                                                | 0.184850895                           | 92.43008949                                      |
| 0.010127568                                       | 0.079876135                                                | 0.235970607                           | 132.6755909                                      |
| 0.005591381                                       | 0.079831908                                                | 0.264779869                           | 204.7919574                                      |
| 0.01349069                                        | 0.077134606                                                | 0.268219391                           | 123.5737321                                      |
| 0.004392606                                       | 0.059307682                                                | 0.228890611                           | 180.0746649                                      |
| 0.012537664                                       | 0.065748389                                                | 0.173083684                           | 207.3862497                                      |
| 0.004544413                                       | 0.064542486                                                | 0.179857557                           | 209.372923                                       |
| 0.008622021                                       | 0.085460523                                                | 0.243434424                           | 110.9204686                                      |
| 0.043119237                                       | 0.082911493                                                | 0.237408763                           | 40.1419095                                       |
| 0.008996871                                       | 0.070203216                                                | 0.236320788                           | 65.49932524                                      |
| 0.004716327                                       | 0.076446395                                                | 0.27159992                            | 258.0187586                                      |
| 0.005957724                                       | 0.10666208                                                 | 0.380592415                           | 169.8301517                                      |
| 0.006941651                                       | 0.069156825                                                | 0.243376086                           | 225.0655004                                      |
| 0.003807979                                       | 0.070614427                                                | 0.167232241                           | 73.23095714                                      |
| 0.005351221                                       | 0.063380167                                                | 0.181222146                           | 221.9645896                                      |
| 0.005788836                                       | 0.058057688                                                | 0.149368485                           | 98.33550687                                      |
| 0.003827929                                       | 0.063932419                                                | 0.177223657                           | 185.9154155                                      |
| 0.008612096                                       | 0.088219433                                                | 0.41665033                            | 173.6285588                                      |
| 0.007384583                                       | 0.077250011                                                | 0.16708347                            | 93.5256689                                       |
| 0.011440181                                       | 0.10566801                                                 | 0.25304281                            | 125.0871412                                      |
| 0.006763133                                       | 0.06263391                                                 | 0.250326377                           | 156.9346312                                      |
| 0.003379719                                       | 0.071674498                                                | 0.227643895                           | 340.6973702                                      |
| 0.005566608                                       | 0.071445427                                                | 0.197778061                           | 141.5242075                                      |
| 0.008621078                                       | 0.065222208                                                | 0.135359996                           | 110.4866621                                      |
| 0.009712136                                       | 0.071543944                                                | 0.13271775                            | 38.18844969                                      |
| 0.01279703                                        | 0.064391913                                                | 0.152903283                           | 88.67697091                                      |
| 0.013112359                                       | 0.065659942                                                | 0.209433893                           | 59.81869037                                      |
| 0.008120179                                       | 0.0609367                                                  | 0.186691418                           | 191.0143958                                      |
| 0.007511766                                       | 0.077985478                                                | 0.198449331                           | 87.03123039                                      |
| 0.004107809                                       | 0.063805859                                                | 0.173618959                           | 141.1371136                                      |
| 0.006085957                                       | 0.050902646                                                | 0.131720107                           | 175.6878339                                      |
| 0.006917738                                       | 0.08678037                                                 | 0.247341084                           | 153.5286946                                      |
| 0.004816381                                       | 0.067359586                                                | 0.20970672                            | 275.4887539                                      |
| 0.00389046                                        | 0.073447311                                                | 0.186730903                           | 420.7025914                                      |
| 0.004786708                                       | 0.057546774                                                | 0.166532298                           | 217.9904103                                      |
| 0.006423138                                       | 0.062689316                                                | 0.175335562                           | 129.036393                                       |
| 0.006395824                                       | 0.084276117                                                | 0.273939895                           | 167.6565905                                      |
| 0.007690782                                       | 0.07528374                                                 | 0.181364001                           | 90.13527174                                      |
| 0.004545719                                       | 0.074492925                                                | 0.189580955                           | 214.8456521                                      |
| 0.004152885                                       | 0.074805814                                                | 0.222786368                           | 288.2449594                                      |
| 0.002651744                                       | 0.07367987                                                 | 0.196594618                           | 88.08112351                                      |
| 0.004391828                                       | 0.06167182                                                 | 0.142249851                           | 147.3097629                                      |
| 0.003909566                                       | 0.065349105                                                | 0.154868487                           | 144.2927889                                      |
| 0.021227892                                       | 0.104076656                                                | 0.367145426                           | 43.95532215                                      |
| 0.005623973                                       | 0.064022559                                                | 0.157631849                           | 219.8958953                                      |
| 0.015837063                                       | 0.067864118                                                | 0.225605183                           | 202.0862174                                      |
| 0.005683754                                       | 0.058833871                                                | 0.136700011                           | 75.4448875                                       |
| 0.010984414                                       | 0.077499394                                                | 0.224018722                           | 203.6195661                                      |
| 0.025671267                                       | 0.107961074                                                | 0.194653941                           | 39.20318948                                      |
| 0.021843996                                       | 0.074502163                                                | 0.161920536                           | 38.17518775                                      |
| 0.00455353                                        | 0.069403529                                                | 0.184991555                           | 195.9751652                                      |
| 0.012087443                                       | 0.066173768                                                | 0.142556667                           | 65.69854367                                      |
| 0.008820292                                       | 0.083920463                                                | 0.159580387                           | 115.5634034                                      |
| 0.003803993                                       | 0.077686552                                                | 0.232719465                           | 289.9703301                                      |
| 0.010677317                                       | 0.077557965                                                | 0.21509985                            | 316.1621535                                      |
| 0.007542642                                       | 0.045404386                                                | 0.084440879                           | 37.54485632                                      |
| 0.006880729                                       | 0.093849215                                                | 0.260764139                           | 139.760468                                       |
| 0.030413753                                       | 0.074035838                                                | 0.191984266                           | 27.8624694                                       |
| 0.021323843                                       | 0.091515772                                                | 0.296931619                           | 67.01510397                                      |
| 0.010030746                                       | 0.050420991                                                | 0.076508188                           | 54.28506362                                      |

|                                           |                                                         |                                                  |                                            |
|-------------------------------------------|---------------------------------------------------------|--------------------------------------------------|--------------------------------------------|
| log.sigma.4.5.mm.3D_glrIm_LongRunEmphasis | log.sigma.4.5.mm.3D_glrIm_ShortRunHighGrayLevelEmphasis | log.sigma.4.5.mm.3D_glrIm_RunLengthNonUniformity | log.sigma.4.5.mm.3D_glrIm_ShortRunEmphasis |
| 1.426070642                               | 220.0725108                                             | 873.7946038                                      | 0.920701438                                |
| 1.485673224                               | 286.6172426                                             | 1393.690203                                      | 0.910138156                                |
| 1.383320821                               | 212.7867799                                             | 827.1376325                                      | 0.923701789                                |
| 1.500147331                               | 134.9673537                                             | 1710.426828                                      | 0.909730037                                |
| 1.668184705                               | 125.3797996                                             | 597.3998666                                      | 0.884091955                                |
| 1.61011094                                | 112.2754551                                             | 1057.605444                                      | 0.890306243                                |
| 2.051584814                               | 70.3786975                                              | 559.0951596                                      | 0.840710043                                |
| 1.514610704                               | 287.146646                                              | 1245.876822                                      | 0.907622774                                |
| 1.473809317                               | 203.737521                                              | 1443.687324                                      | 0.916032243                                |
| 1.395703671                               | 554.6958541                                             | 2207.021146                                      | 0.922918606                                |
| 1.714037912                               | 109.176872                                              | 1107.825561                                      | 0.878385296                                |
| 1.411846467                               | 237.941093                                              | 1233.928224                                      | 0.922020769                                |
| 1.804109923                               | 161.4703969                                             | 1760.115099                                      | 0.874911695                                |
| 1.44285425                                | 117.8050842                                             | 1325.449277                                      | 0.915268254                                |
| 1.466916136                               | 234.6447741                                             | 1103.390554                                      | 0.914799028                                |
| 1.669943075                               | 327.7878949                                             | 2740.227931                                      | 0.90167597                                 |
| 1.51460809                                | 342.9156916                                             | 1118.626277                                      | 0.90887817                                 |
| 1.6639413                                 | 239.9667986                                             | 1660.246302                                      | 0.89352223                                 |
| 1.409663401                               | 251.0530783                                             | 833.1796127                                      | 0.922127658                                |
| 1.565158951                               | 206.4252385                                             | 1932.04057                                       | 0.898665638                                |
| 1.497171174                               | 330.1006168                                             | 4782.645798                                      | 0.90651573                                 |
| 1.502373344                               | 285.57109                                               | 1480.102404                                      | 0.909670332                                |
| 1.449151332                               | 276.3078124                                             | 2921.740092                                      | 0.913910736                                |
| 1.499647031                               | 175.2932531                                             | 735.4707811                                      | 0.914224707                                |
| 1.393655114                               | 184.7043746                                             | 1925.525467                                      | 0.923760757                                |
| 1.401888628                               | 308.5604187                                             | 1006.342035                                      | 0.926790626                                |
| 1.397213511                               | 200.7841569                                             | 1636.654455                                      | 0.924752739                                |
| 1.351166627                               | 234.2591098                                             | 2542.768152                                      | 0.930574198                                |
| 1.544339296                               | 318.7372155                                             | 2386.270538                                      | 0.911557959                                |
| 1.471145353                               | 380.350813                                              | 2251.928159                                      | 0.915692975                                |
| 1.477969385                               | 357.3034488                                             | 2882.152355                                      | 0.909171348                                |
| 1.479083154                               | 311.2312239                                             | 3530.110979                                      | 0.913346722                                |
| 1.552239926                               | 531.2136245                                             | 1701.360998                                      | 0.900994799                                |
| 1.514909963                               | 160.6775317                                             | 330.526313                                       | 0.905356373                                |
| 1.48681108                                | 143.0073416                                             | 614.5983183                                      | 0.906327056                                |
| 1.572251706                               | 220.9298365                                             | 2168.814782                                      | 0.902781462                                |
| 1.392970828                               | 440.5408608                                             | 2653.843821                                      | 0.926395189                                |
| 1.549329426                               | 248.8771196                                             | 2272.871326                                      | 0.900311467                                |
| 1.870215114                               | 163.1805417                                             | 879.3902884                                      | 0.868203271                                |
| 1.674955552                               | 115.4290644                                             | 1031.990661                                      | 0.885909868                                |
| 1.482894224                               | 135.4286457                                             | 930.5990985                                      | 0.913428185                                |
| 1.597160588                               | 143.9121502                                             | 1276.872086                                      | 0.897379268                                |
| 1.671168611                               | 246.0651781                                             | 1931.022788                                      | 0.888829511                                |
| 1.666799477                               | 143.8905567                                             | 1214.956419                                      | 0.891312747                                |
| 1.565839845                               | 386.0705574                                             | 2385.539353                                      | 0.905510204                                |
| 1.463993172                               | 166.3867188                                             | 2518.542548                                      | 0.912346548                                |
| 1.477333004                               | 363.8219815                                             | 2584.842012                                      | 0.911569066                                |
| 1.622531304                               | 256.4442356                                             | 986.2230466                                      | 0.892747163                                |
| 1.641973665                               | 73.34459466                                             | 372.8029127                                      | 0.890648627                                |
| 1.619102506                               | 182.0512289                                             | 712.8117404                                      | 0.893569325                                |
| 1.677824278                               | 306.463569                                              | 2542.320153                                      | 0.889024475                                |
| 1.918714045                               | 229.5602295                                             | 1128.183112                                      | 0.863934091                                |
| 1.612991351                               | 203.9613547                                             | 2497.44814                                       | 0.896740282                                |
| 1.449815625                               | 393.1104368                                             | 834.5210678                                      | 0.914873196                                |
| 1.450241506                               | 273.8785642                                             | 2864.157572                                      | 0.921460309                                |
| 1.39768311                                | 296.9668337                                             | 1391.728765                                      | 0.923739878                                |
| 1.457382459                               | 458.5410079                                             | 2354.802658                                      | 0.917386289                                |
| 1.981035412                               | 171.9557617                                             | 1380.806446                                      | 0.860380113                                |
| 1.459174563                               | 238.4266887                                             | 961.2838482                                      | 0.910189737                                |
| 1.677043544                               | 122.3608674                                             | 872.869625                                       | 0.880054569                                |
| 1.635927951                               | 220.9595047                                             | 1901.415024                                      | 0.892431859                                |
| 1.573884616                               | 397.9697566                                             | 3716.008011                                      | 0.902883845                                |
| 1.525495743                               | 274.2720811                                             | 1557.388108                                      | 0.90489778                                 |
| 1.356470765                               | 199.6030964                                             | 1423.000821                                      | 0.932084098                                |
| 1.361446961                               | 185.5923535                                             | 445.0420168                                      | 0.92862949                                 |
| 1.414357063                               | 158.3722469                                             | 1121.988382                                      | 0.920120162                                |
| 1.568717422                               | 159.9286167                                             | 696.9969542                                      | 0.895286156                                |
| 1.487311134                               | 210.2030669                                             | 2498.070622                                      | 0.91150829                                 |
| 1.551170125                               | 195.6427995                                             | 856.9071055                                      | 0.895535355                                |
| 1.46603135                                | 363.3430465                                             | 1764.894809                                      | 0.912131913                                |
| 1.354464648                               | 354.8638085                                             | 2893.579222                                      | 0.931143202                                |
| 1.624192732                               | 199.2413297                                             | 1354.213919                                      | 0.894893174                                |
| 1.528482028                               | 338.1531024                                             | 3237.051508                                      | 0.90858277                                 |
| 1.484564312                               | 326.7041585                                             | 4573.462486                                      | 0.912344176                                |
| 1.438660399                               | 334.0760865                                             | 3069.869064                                      | 0.918221798                                |
| 1.465653416                               | 299.9696785                                             | 1650.763048                                      | 0.913711771                                |
| 1.691246441                               | 222.6632072                                             | 1488.727598                                      | 0.886068492                                |
| 1.482725994                               | 222.3168301                                             | 958.2992117                                      | 0.911840497                                |
| 1.493640322                               | 301.5048664                                             | 2301.695694                                      | 0.911183891                                |
| 1.569276448                               | 334.1815449                                             | 2987.313017                                      | 0.900644715                                |
| 1.507278945                               | 650.0504698                                             | 950.6307828                                      | 0.910269663                                |
| 1.386001361                               | 393.3712782                                             | 1969.773439                                      | 0.924852673                                |
| 1.416962154                               | 371.2508999                                             | 1797.239321                                      | 0.919871915                                |
| 1.959018963                               | 80.19189693                                             | 295.4619528                                      | 0.851022472                                |
| 1.427827489                               | 319.552701                                              | 2777.583735                                      | 0.917227701                                |
| 1.597220491                               | 124.3877479                                             | 2269.312854                                      | 0.893603488                                |
| 1.380528132                               | 313.3279951                                             | 1051.072027                                      | 0.923139879                                |
| 1.578641095                               | 143.771744                                              | 2031.940602                                      | 0.899036249                                |
| 1.54132523                                | 66.19636637                                             | 298.9528181                                      | 0.909536593                                |
| 1.445652343                               | 130.2751622                                             | 411.0782344                                      | 0.913338937                                |
| 1.486068989                               | 282.2019149                                             | 2249.748848                                      | 0.911270833                                |
| 1.387957191                               | 193.7120379                                             | 818.3406367                                      | 0.924295155                                |
| 1.452169914                               | 192.4952343                                             | 1089.965813                                      | 0.90916547                                 |
| 1.60335643                                | 333.6102573                                             | 2851.642518                                      | 0.894702551                                |
| 1.558170854                               | 161.2665981                                             | 3162.061656                                      | 0.900885376                                |
| 1.231557716                               | 518.6931254                                             | 730.7162515                                      | 0.952033837                                |
| 1.678797223                               | 190.5193859                                             | 1108.441284                                      | 0.883726                                   |
| 1.509437124                               | 89.47691563                                             | 301.8603421                                      | 0.910091577                                |
| 1.787929292                               | 81.06241484                                             | 521.9029988                                      | 0.866686052                                |
| 1.226851653                               | 328.7435652                                             | 941.2328401                                      | 0.948555564                                |

| log.sigma.4.5.mm.3D_glrIm_LongRunHighGrayLevelEmphasis | log.sigma.4.5.mm.3D_glrIm_RunPercentage | log.sigma.4.5.mm.3D_glrIm_LongRunLowGrayLevelEmphasis | log.sigma.4.5.mm.3D_glrIm_RunEntropy |
|--------------------------------------------------------|-----------------------------------------|-------------------------------------------------------|--------------------------------------|
| 322.9162466                                            | 0.891105569                             | 0.01473076                                            | 4.861681321                          |
| 452.3292426                                            | 0.878384615                             | 0.007535107                                           | 4.624549531                          |
| 326.8522894                                            | 0.898720242                             | 0.011000301                                           | 4.591722343                          |
| 212.3312354                                            | 0.876979523                             | 0.019751888                                           | 4.606114526                          |
| 206.3891901                                            | 0.844370593                             | 0.027489285                                           | 4.565826063                          |
| 192.1314736                                            | 0.854043393                             | 0.024145614                                           | 4.49945858                           |
| 132.2706752                                            | 0.788006695                             | 0.066813411                                           | 4.428986973                          |
| 461.462736                                             | 0.873897294                             | 0.00830676                                            | 4.839360871                          |
| 309.1026479                                            | 0.883306136                             | 0.011533676                                           | 4.701195437                          |
| 842.3345876                                            | 0.896052665                             | 0.003279194                                           | 4.791256729                          |
| 200.4119549                                            | 0.837256822                             | 0.022137184                                           | 4.391853832                          |
| 363.0008792                                            | 0.894133759                             | 0.009474733                                           | 4.581153989                          |
| 311.0543831                                            | 0.826640754                             | 0.014101629                                           | 4.56599062                           |
| 186.668745                                             | 0.886271425                             | 0.027546617                                           | 4.477211621                          |
| 363.617247                                             | 0.884466309                             | 0.010200944                                           | 4.840422278                          |
| 564.1732387                                            | 0.855963457                             | 0.008970233                                           | 4.927739092                          |
| 580.2546555                                            | 0.87620417                              | 0.006348205                                           | 4.710317371                          |
| 414.8590087                                            | 0.851266013                             | 0.009540741                                           | 4.722647075                          |
| 380.9505172                                            | 0.894230769                             | 0.007730078                                           | 4.410441159                          |
| 345.9752793                                            | 0.863309734                             | 0.015845801                                           | 4.706205006                          |
| 547.2791911                                            | 0.874964029                             | 0.005652827                                           | 4.728257233                          |
| 471.2448427                                            | 0.87814166                              | 0.007172997                                           | 4.717635187                          |
| 430.5328469                                            | 0.884475389                             | 0.007844017                                           | 4.74742707                           |
| 274.2122924                                            | 0.88304705                              | 0.019862371                                           | 4.674887421                          |
| 283.798582                                             | 0.897790382                             | 0.020527347                                           | 4.709897806                          |
| 448.1848997                                            | 0.898668639                             | 0.007515128                                           | 4.7664496                            |
| 303.9769407                                            | 0.897401106                             | 0.010777444                                           | 4.620432625                          |
| 348.7161019                                            | 0.906339562                             | 0.010343904                                           | 4.612622965                          |
| 538.7135438                                            | 0.87571005                              | 0.007152558                                           | 4.6301319                            |
| 614.3528328                                            | 0.883775294                             | 0.004885991                                           | 4.712945743                          |
| 588.8929821                                            | 0.878431081                             | 0.005447253                                           | 4.786203293                          |
| 497.5290854                                            | 0.881061538                             | 0.008038962                                           | 4.741009436                          |
| 896.1461615                                            | 0.866182415                             | 0.004488461                                           | 4.799946815                          |
| 242.2495503                                            | 0.87254118                              | 0.022021877                                           | 4.591447532                          |
| 239.0289417                                            | 0.876992377                             | 0.021475462                                           | 4.560638356                          |
| 377.5040647                                            | 0.865043877                             | 0.009159845                                           | 4.522041995                          |
| 663.3955215                                            | 0.898635688                             | 0.004636212                                           | 4.907020466                          |
| 429.0697331                                            | 0.865503709                             | 0.008212412                                           | 4.538273741                          |
| 327.3885434                                            | 0.821324902                             | 0.014834867                                           | 4.49494802                           |
| 192.8295437                                            | 0.844414143                             | 0.028089961                                           | 4.616571549                          |
| 213.6865346                                            | 0.880699088                             | 0.018268368                                           | 4.393902539                          |
| 236.8933276                                            | 0.859571588                             | 0.016073786                                           | 4.475076867                          |
| 443.9042931                                            | 0.846763742                             | 0.008728654                                           | 4.550369403                          |
| 239.8255199                                            | 0.849542708                             | 0.021296035                                           | 4.633774752                          |
| 666.7995902                                            | 0.868191625                             | 0.006114473                                           | 4.973677489                          |
| 272.8519287                                            | 0.882173211                             | 0.017556868                                           | 4.688705855                          |
| 580.7448663                                            | 0.879878125                             | 0.00640411                                            | 4.816381516                          |
| 484.6741429                                            | 0.855236452                             | 0.011602686                                           | 4.572149599                          |
| 118.2013847                                            | 0.856655756                             | 0.074953573                                           | 4.330623086                          |
| 296.1442147                                            | 0.855116443                             | 0.014105957                                           | 4.697981241                          |
| 552.6639618                                            | 0.846482082                             | 0.007399692                                           | 4.698100038                          |
| 492.7226138                                            | 0.812450842                             | 0.010322686                                           | 4.411811553                          |
| 342.4468706                                            | 0.856830291                             | 0.011146684                                           | 4.71784601                           |
| 626.1103186                                            | 0.885633581                             | 0.005004552                                           | 4.576763049                          |
| 427.8916052                                            | 0.889451164                             | 0.007396924                                           | 4.712825265                          |
| 440.0538054                                            | 0.896960561                             | 0.007629435                                           | 4.852542968                          |
| 716.4395729                                            | 0.886527318                             | 0.005053421                                           | 4.793834628                          |
| 336.2972645                                            | 0.806585273                             | 0.016768287                                           | 4.712008712                          |
| 379.1148272                                            | 0.882092397                             | 0.009801882                                           | 4.529177169                          |
| 235.1187088                                            | 0.84226663                              | 0.017387467                                           | 4.172950674                          |
| 375.9689604                                            | 0.851829571                             | 0.010986657                                           | 4.812848696                          |
| 690.0048551                                            | 0.865822714                             | 0.004899673                                           | 4.745670039                          |
| 460.9825471                                            | 0.871794872                             | 0.007773007                                           | 4.669766042                          |
| 300.4235762                                            | 0.90672871                              | 0.010884483                                           | 4.539967566                          |
| 273.2313533                                            | 0.904432855                             | 0.012126757                                           | 4.416256598                          |
| 226.6195413                                            | 0.89226781                              | 0.018326918                                           | 4.662893856                          |
| 246.6717088                                            | 0.860622364                             | 0.020384301                                           | 4.795828186                          |
| 333.7932564                                            | 0.878985288                             | 0.011590593                                           | 4.810595198                          |
| 341.555068                                             | 0.863466                                | 0.010685326                                           | 4.500690198                          |
| 567.4424115                                            | 0.881930594                             | 0.005670278                                           | 4.809367076                          |
| 519.1933815                                            | 0.906371202                             | 0.007895642                                           | 4.981542561                          |
| 341.6805536                                            | 0.857164185                             | 0.01071976                                            | 4.487193305                          |
| 549.7314812                                            | 0.8737074                               | 0.007109847                                           | 4.774332806                          |
| 539.2886468                                            | 0.879694718                             | 0.00547458                                            | 4.615588676                          |
| 507.8838964                                            | 0.888640219                             | 0.006549698                                           | 4.919260864                          |
| 474.1435679                                            | 0.882783883                             | 0.008735222                                           | 4.812769055                          |
| 422.7864782                                            | 0.843932713                             | 0.009663244                                           | 4.556226353                          |
| 356.5437427                                            | 0.880794702                             | 0.010542315                                           | 4.53239696                           |
| 499.9295148                                            | 0.879660937                             | 0.006274061                                           | 4.629010185                          |
| 586.9818248                                            | 0.864862064                             | 0.005951931                                           | 4.724063811                          |
| 1072.826567                                            | 0.876764938                             | 0.003422106                                           | 4.749162123                          |
| 594.6184243                                            | 0.898786949                             | 0.005605319                                           | 4.825914022                          |
| 561.1793861                                            | 0.89223307                              | 0.005213811                                           | 4.7356889                            |
| 153.8989005                                            | 0.805706722                             | 0.041460126                                           | 4.187263213                          |
| 500.9948127                                            | 0.889335936                             | 0.007523568                                           | 4.760512388                          |
| 207.7633046                                            | 0.857003676                             | 0.025046163                                           | 4.715795042                          |
| 462.5291878                                            | 0.897866839                             | 0.007271322                                           | 4.839054352                          |
| 243.5116608                                            | 0.863065295                             | 0.016627542                                           | 4.5252704                            |
| 117.401886                                             | 0.883211679                             | 0.037067992                                           | 3.765903412                          |
| 207.5011134                                            | 0.886212404                             | 0.028818876                                           | 4.45000185                           |
| 441.5591072                                            | 0.879045588                             | 0.006686219                                           | 4.623167999                          |
| 291.4507577                                            | 0.898433693                             | 0.01465713                                            | 4.603921451                          |
| 315.4456988                                            | 0.881512853                             | 0.011550789                                           | 4.423040715                          |
| 592.418109                                             | 0.857110039                             | 0.005742882                                           | 4.68234301                           |
| 272.6261419                                            | 0.865948544                             | 0.015910806                                           | 4.568986589                          |
| 692.5408289                                            | 0.93499826                              | 0.008457726                                           | 5.052181527                          |
| 346.9575216                                            | 0.84419041                              | 0.0108883                                             | 4.386189326                          |
| 133.0814316                                            | 0.878864127                             | 0.04754118                                            | 4.383589465                          |
| 147.58531                                              | 0.823717949                             | 0.037301949                                           | 4.398198951                          |
| 436.0917066                                            | 0.932942274                             | 0.01172688                                            | 4.927308327                          |

| log.sigma.4.5.mm.3D_glrIm_HighGrayLevelRunEmphasis | log.sigma.4.5.mm.3D_glrIm_RunLengthNonUniformityNormalized | log.sigma.4.5.mm.3D_glszm_GrayLevelVariance |
|----------------------------------------------------|------------------------------------------------------------|---------------------------------------------|
| 236.6935432                                        | 0.813887433                                                | 30.85630308                                 |
| 312.9602294                                        | 0.791860508                                                | 23.91767986                                 |
| 231.593444                                         | 0.820897729                                                | 23.2813143                                  |
| 147.1167797                                        | 0.79235302                                                 | 21.67592719                                 |
| 138.0531393                                        | 0.742164261                                                | 19.10613368                                 |
| 124.5300643                                        | 0.7532771                                                  | 22.28149495                                 |
| 79.31369883                                        | 0.665292797                                                | 10.59639922                                 |
| 314.336132                                         | 0.787750744                                                | 30.13742651                                 |
| 220.3253511                                        | 0.804676865                                                | 24.19990197                                 |
| 601.8013383                                        | 0.818660293                                                | 30.13859554                                 |
| 122.9290128                                        | 0.72996958                                                 | 14.89744098                                 |
| 257.9178554                                        | 0.81705134                                                 | 23.94123893                                 |
| 182.1852917                                        | 0.724245035                                                | 21.51980975                                 |
| 128.9279022                                        | 0.80290847                                                 | 17.85234489                                 |
| 254.9630529                                        | 0.802856265                                                | 32.18145189                                 |
| 359.9755946                                        | 0.77665365                                                 | 32.14717609                                 |
| 378.6835909                                        | 0.791482603                                                | 32.83534219                                 |
| 265.2510046                                        | 0.75995058                                                 | 22.87573633                                 |
| 271.9587499                                        | 0.817891304                                                | 18.65297357                                 |
| 228.0385797                                        | 0.769335016                                                | 24.47349516                                 |
| 364.6398668                                        | 0.784699776                                                | 25.95754538                                 |
| 313.8972826                                        | 0.791884412                                                | 28.23251064                                 |
| 301.5161495                                        | 0.799866443                                                | 28.23845582                                 |
| 190.0586909                                        | 0.803343648                                                | 23.8262771                                  |
| 200.8659864                                        | 0.8211303                                                  | 22.93150845                                 |
| 330.9274666                                        | 0.82688525                                                 | 34.5989                                     |
| 217.3168085                                        | 0.822995896                                                | 24.29991654                                 |
| 252.9984919                                        | 0.834852786                                                | 22.48084865                                 |
| 349.7247115                                        | 0.797492498                                                | 32.73835424                                 |
| 416.2160784                                        | 0.804357842                                                | 33.43839507                                 |
| 394.0659119                                        | 0.790225943                                                | 30.23952643                                 |
| 340.3448141                                        | 0.799233922                                                | 25.33239022                                 |
| 587.1718196                                        | 0.773972761                                                | 41.88028253                                 |
| 174.1942959                                        | 0.784593137                                                | 22.18252837                                 |
| 158.5382456                                        | 0.78570993                                                 | 20.6041794                                  |
| 244.0276877                                        | 0.777583217                                                | 21.62513084                                 |
| 475.8940123                                        | 0.826116583                                                | 39.96831334                                 |
| 276.7628024                                        | 0.77245195                                                 | 22.7271643                                  |
| 185.4774583                                        | 0.714801173                                                | 21.40081194                                 |
| 127.3728164                                        | 0.74487937                                                 | 20.17206951                                 |
| 147.6706486                                        | 0.800302221                                                | 16.74433107                                 |
| 158.2749591                                        | 0.766857586                                                | 16.92236264                                 |
| 274.8758483                                        | 0.750717751                                                | 21.46204555                                 |
| 158.1248664                                        | 0.755930599                                                | 25.08467182                                 |
| 426.8227351                                        | 0.783816546                                                | 38.41980511                                 |
| 183.3381722                                        | 0.79672508                                                 | 20.36659808                                 |
| 398.2442309                                        | 0.795245263                                                | 31.05947805                                 |
| 289.9229456                                        | 0.757932972                                                | 29.14782485                                 |
| 80.25078766                                        | 0.761273535                                                | 11.02190463                                 |
| 199.25089                                          | 0.760953261                                                | 25.39270833                                 |
| 342.085065                                         | 0.751202745                                                | 29.67560554                                 |
| 264.1231899                                        | 0.705353686                                                | 25.63459227                                 |
| 224.8526584                                        | 0.765763587                                                | 22.78670835                                 |
| 430.3902325                                        | 0.802371236                                                | 22.53093434                                 |
| 296.8781227                                        | 0.816279299                                                | 25.32425111                                 |
| 320.0112971                                        | 0.820224566                                                | 34.22987769                                 |
| 498.4751799                                        | 0.807757998                                                | 35.93506499                                 |
| 193.8832823                                        | 0.698911733                                                | 24.90917595                                 |
| 261.7577228                                        | 0.792200722                                                | 23.15764579                                 |
| 139.5055309                                        | 0.734194847                                                | 12.05484087                                 |
| 244.6117964                                        | 0.757105004                                                | 21.43784352                                 |
| 440.570702                                         | 0.779005561                                                | 33.6832483                                  |
| 303.1228796                                        | 0.783054224                                                | 24.31439715                                 |
| 215.5629011                                        | 0.83852228                                                 | 20.27396068                                 |
| 200.2399208                                        | 0.831607602                                                | 19.05139414                                 |
| 169.8982875                                        | 0.813083228                                                | 23.26940432                                 |
| 174.0382365                                        | 0.76302169                                                 | 27.67402742                                 |
| 229.5104482                                        | 0.795229335                                                | 27.12929781                                 |
| 218.642205                                         | 0.764176683                                                | 16.81456154                                 |
| 396.3365194                                        | 0.79630434                                                 | 31.70258032                                 |
| 381.4936782                                        | 0.836546523                                                | 36.32071231                                 |
| 220.6269765                                        | 0.762918099                                                | 22.63042874                                 |
| 370.0400012                                        | 0.78958816                                                 | 25.81165169                                 |
| 359.2912014                                        | 0.796844219                                                | 21.79157073                                 |
| 361.8035146                                        | 0.808872654                                                | 36.40414189                                 |
| 327.5376208                                        | 0.800042539                                                | 34.0927336                                  |
| 251.2762745                                        | 0.745790408                                                | 23.39741628                                 |
| 243.4123746                                        | 0.797090626                                                | 20.63719497                                 |
| 331.6387254                                        | 0.795495682                                                | 25.72241488                                 |
| 371.7425873                                        | 0.773354321                                                | 30.71548815                                 |
| 714.3856281                                        | 0.793389691                                                | 47.42416241                                 |
| 426.0389075                                        | 0.822955103                                                | 35.47949938                                 |
| 402.1385984                                        | 0.812338492                                                | 31.21402576                                 |
| 91.00042563                                        | 0.690522072                                                | 9.857568027                                 |
| 348.9024591                                        | 0.806829699                                                | 27.51138765                                 |
| 137.4766269                                        | 0.75969524                                                 | 20.162387                                   |
| 338.7694641                                        | 0.818600843                                                | 34.34267079                                 |
| 158.7554491                                        | 0.770695991                                                | 18.20527867                                 |
| 73.69185197                                        | 0.805674305                                                | 6.459829868                                 |
| 142.9321547                                        | 0.799441711                                                | 18.7307526                                  |
| 307.5045514                                        | 0.794944095                                                | 22.86422031                                 |
| 209.7571391                                        | 0.822098754                                                | 26.21765175                                 |
| 212.8537391                                        | 0.789828936                                                | 18.96527912                                 |
| 372.3801136                                        | 0.761882214                                                | 28.96469184                                 |
| 178.4173771                                        | 0.773635896                                                | 19.08714211                                 |
| 548.4413087                                        | 0.882730772                                                | 55.44050244                                 |
| 213.7993914                                        | 0.741307609                                                | 18.04606601                                 |
| 96.7477121                                         | 0.796063801                                                | 13.86031746                                 |
| 91.09385382                                        | 0.709900201                                                | 15.25163834                                 |
| 348.5968087                                        | 0.873615867                                                | 40.15542445                                 |

| log.sigma.4.5.mm.3D_glszm_SmallAreaHighGrayLevelEmphasis | log.sigma.4.5.mm.3D_glszm_GrayLevelNonUniformityNormalized | log.sigma.4.5.mm.3D_glszm_SizeZoneNonUniformityNormalized |
|----------------------------------------------------------|------------------------------------------------------------|-----------------------------------------------------------|
| 153.7917263                                              | 0.054057843                                                | 0.33610399                                                |
| 161.6723064                                              | 0.060612081                                                | 0.262413075                                               |
| 106.6933584                                              | 0.058942732                                                | 0.251744709                                               |
| 80.31715491                                              | 0.060105184                                                | 0.272274776                                               |
| 85.51004534                                              | 0.066993258                                                | 0.28400798                                                |
| 71.21400932                                              | 0.063801991                                                | 0.249346798                                               |
| 52.89499835                                              | 0.098724048                                                | 0.255730969                                               |
| 173.0938828                                              | 0.052873903                                                | 0.294531397                                               |
| 120.3432386                                              | 0.058374669                                                | 0.318451132                                               |
| 306.8174163                                              | 0.052348735                                                | 0.266492041                                               |
| 55.8122622                                               | 0.074918998                                                | 0.216469395                                               |
| 138.3636653                                              | 0.057911614                                                | 0.295037057                                               |
| 103.2717868                                              | 0.059912802                                                | 0.267728894                                               |
| 63.11448656                                              | 0.066339556                                                | 0.244814222                                               |
| 134.1041786                                              | 0.050777226                                                | 0.303083721                                               |
| 200.4012406                                              | 0.049752001                                                | 0.289335382                                               |
| 176.7777552                                              | 0.050648681                                                | 0.266764531                                               |
| 148.0660613                                              | 0.060883143                                                | 0.273185893                                               |
| 158.0218275                                              | 0.069160559                                                | 0.324651325                                               |
| 111.605599                                               | 0.057968398                                                | 0.251586901                                               |
| 172.9595756                                              | 0.056383083                                                | 0.265193661                                               |
| 169.3102637                                              | 0.055555556                                                | 0.277178089                                               |
| 159.8480261                                              | 0.053042548                                                | 0.251516008                                               |
| 108.1783365                                              | 0.060725538                                                | 0.24305711                                                |
| 96.09847668                                              | 0.057384815                                                | 0.255223853                                               |
| 193.4698914                                              | 0.0480875                                                  | 0.3148125                                                 |
| 119.8903148                                              | 0.057372807                                                | 0.310931111                                               |
| 114.9703257                                              | 0.059543278                                                | 0.277121542                                               |
| 173.8253991                                              | 0.050860727                                                | 0.313715398                                               |
| 218.0828959                                              | 0.048777047                                                | 0.309574036                                               |
| 194.3439706                                              | 0.052042267                                                | 0.277780564                                               |
| 181.2993004                                              | 0.056352485                                                | 0.29073613                                                |
| 336.1510356                                              | 0.049127036                                                | 0.312258017                                               |
| 89.24712447                                              | 0.061194122                                                | 0.274722549                                               |
| 72.62139051                                              | 0.06157743                                                 | 0.258406848                                               |
| 118.0301                                                 | 0.060233717                                                | 0.245184271                                               |
| 235.098959                                               | 0.044842823                                                | 0.289791693                                               |
| 138.5348106                                              | 0.060544868                                                | 0.281125636                                               |
| 84.53432177                                              | 0.061506059                                                | 0.2040536                                                 |
| 82.17122597                                              | 0.063654033                                                | 0.289300754                                               |
| 74.40015581                                              | 0.068142903                                                | 0.301471609                                               |
| 83.52464025                                              | 0.068936129                                                | 0.239665262                                               |
| 130.4770947                                              | 0.064142506                                                | 0.240502014                                               |
| 105.0083994                                              | 0.05563267                                                 | 0.313900456                                               |
| 203.7199022                                              | 0.045164403                                                | 0.2884253                                                 |
| 94.28170045                                              | 0.061963392                                                | 0.263305334                                               |
| 225.3239926                                              | 0.052287434                                                | 0.300704673                                               |
| 127.3946563                                              | 0.054353863                                                | 0.258184407                                               |
| 46.3208612                                               | 0.090922149                                                | 0.285119219                                               |
| 136.05616                                                | 0.0575                                                     | 0.322847222                                               |
| 177.1905975                                              | 0.053184673                                                | 0.269522406                                               |
| 107.1394473                                              | 0.059356509                                                | 0.194156805                                               |
| 138.0482856                                              | 0.060025271                                                | 0.287715072                                               |
| 207.1939212                                              | 0.062213039                                                | 0.2899736                                                 |
| 158.1090174                                              | 0.054881736                                                | 0.292424816                                               |
| 177.7167171                                              | 0.047819972                                                | 0.266695152                                               |
| 271.180605                                               | 0.049795328                                                | 0.329373573                                               |
| 116.0014419                                              | 0.060264758                                                | 0.270319031                                               |
| 115.5179223                                              | 0.061306101                                                | 0.243020693                                               |
| 48.50264347                                              | 0.080160619                                                | 0.179803688                                               |
| 130.1447749                                              | 0.060594638                                                | 0.320937979                                               |
| 224.8775471                                              | 0.050906242                                                | 0.289351852                                               |
| 169.7935397                                              | 0.059326457                                                | 0.299333469                                               |
| 89.93638299                                              | 0.061798716                                                | 0.270827015                                               |
| 97.67590797                                              | 0.066280718                                                | 0.371632798                                               |
| 115.3701896                                              | 0.060326121                                                | 0.293625698                                               |
| 130.8963632                                              | 0.056760204                                                | 0.281529018                                               |
| 131.3977118                                              | 0.053510344                                                | 0.302644339                                               |
| 87.60416844                                              | 0.071517782                                                | 0.224258308                                               |
| 210.5073161                                              | 0.050572675                                                | 0.262867182                                               |
| 201.5664286                                              | 0.046180134                                                | 0.305468418                                               |
| 117.1615913                                              | 0.06041465                                                 | 0.269963289                                               |
| 201.6582268                                              | 0.056307263                                                | 0.290125772                                               |
| 166.4638722                                              | 0.061137691                                                | 0.255487466                                               |
| 225.0602816                                              | 0.048395368                                                | 0.308543965                                               |
| 169.6285438                                              | 0.050988504                                                | 0.29024124                                                |
| 116.8904437                                              | 0.059981698                                                | 0.270096371                                               |
| 102.8474666                                              | 0.063523889                                                | 0.213580126                                               |
| 156.4132475                                              | 0.056888641                                                | 0.252661742                                               |
| 171.4831852                                              | 0.050256326                                                | 0.258370364                                               |
| 370.1036607                                              | 0.044638266                                                | 0.297812587                                               |
| 217.5679671                                              | 0.047888238                                                | 0.30079776                                                |
| 232.2081268                                              | 0.051755132                                                | 0.295211084                                               |
| 36.9057219                                               | 0.094671202                                                | 0.235260771                                               |
| 177.2807802                                              | 0.05522716                                                 | 0.284903704                                               |
| 74.78595168                                              | 0.061950294                                                | 0.282617778                                               |
| 190.6700339                                              | 0.049051767                                                | 0.286817377                                               |
| 79.58080597                                              | 0.065945706                                                | 0.256571745                                               |
| 32.33793553                                              | 0.113185255                                                | 0.327032136                                               |
| 65.32253509                                              | 0.067041522                                                | 0.247945502                                               |
| 179.6303803                                              | 0.059930743                                                | 0.298834343                                               |
| 99.11476517                                              | 0.05563506                                                 | 0.269614113                                               |
| 82.84029178                                              | 0.065911809                                                | 0.212588249                                               |
| 179.9803451                                              | 0.052130612                                                | 0.234510204                                               |
| 93.54434028                                              | 0.063589468                                                | 0.27844564                                                |
| 289.0359288                                              | 0.038354235                                                | 0.386863641                                               |
| 114.5054082                                              | 0.07012302                                                 | 0.280057232                                               |
| 46.59287019                                              | 0.079002268                                                | 0.266938776                                               |
| 36.67857328                                              | 0.071767276                                                | 0.180457137                                               |
| 181.2640462                                              | 0.044677089                                                | 0.325396964                                               |

| log.sigma.4.5.mm.3D_glszm_SizeZoneNonUniformity | log.sigma.4.5.mm.3D_glszm_GrayLevelNonUniformity | log.sigma.4.5.mm.3D_glszm_LargeAreaEmphasis | log.sigma.4.5.mm.3D_glszm_ZoneVariance |
|-------------------------------------------------|--------------------------------------------------|---------------------------------------------|----------------------------------------|
| 106.2088608                                     | 17.08227848                                      | 102.4272152                                 | 87.93425533                            |
| 103.6531646                                     | 23.94177215                                      | 292.1518987                                 | 266.5149816                            |
| 78.2926045                                      | 18.33118971                                      | 46.23794212                                 | 33.31495745                            |
| 131.7809917                                     | 29.09090909                                      | 293.7541322                                 | 268.0676653                            |
| 56.51758794                                     | 13.33165829                                      | 195.1507538                                 | 172.4088786                            |
| 59.34453782                                     | 15.18487395                                      | 450.1092437                                 | 402.7424617                            |
| 34.77941176                                     | 13.42647059                                      | 724.1544118                                 | 663.7495134                            |
| 113.6891192                                     | 20.40932642                                      | 208.5880829                                 | 186.7215563                            |
| 160.8178218                                     | 29.47920792                                      | 144.1207921                                 | 128.0097089                            |
| 204.9323797                                     | 40.25617685                                      | 79.84005202                                 | 64.59046843                            |
| 46.10798122                                     | 15.95774648                                      | 792.0798122                                 | 720.1088849                            |
| 128.0460829                                     | 25.13364055                                      | 90.21889401                                 | 75.14517722                            |
| 116.462069                                      | 26.06206897                                      | 836.0206897                                 | 790.6829119                            |
| 91.80533333                                     | 24.87733333                                      | 157.2213333                                 | 132.6726116                            |
| 126.6889952                                     | 21.22488038                                      | 68.37799043                                 | 54.66319452                            |
| 271.3965885                                     | 46.6673774                                       | 223.2761194                                 | 204.0864892                            |
| 94.70140845                                     | 17.98028169                                      | 140.0366197                                 | 119.5960325                            |
| 122.114094                                      | 27.2147651                                       | 394.0357942                                 | 361.2876998                            |
| 91.87632509                                     | 19.57243816                                      | 77.76678445                                 | 61.65351047                            |
| 131.0767754                                     | 30.20153551                                      | 455.2034549                                 | 424.1992919                            |
| 384.7960028                                     | 81.81185389                                      | 228.4231564                                 | 205.4809711                            |
| 128.0562771                                     | 25.66666667                                      | 114.1450216                                 | 93.06857536                            |
| 233.1553398                                     | 49.17044229                                      | 128.5361381                                 | 108.7734616                            |
| 58.57676349                                     | 14.63485477                                      | 85.36929461                                 | 67.10342453                            |
| 176.8701299                                     | 39.76767677                                      | 54.83982684                                 | 40.72045127                            |
| 125.925                                         | 19.235                                           | 63.57                                       | 52.1456                                |
| 172.8776978                                     | 31.89928058                                      | 74.88309353                                 | 59.0695972                             |
| 263.5425868                                     | 56.6256572                                       | 59.20399579                                 | 46.75816148                            |
| 213.3264706                                     | 34.58529412                                      | 304.8191176                                 | 279.8338214                            |
| 237.4432855                                     | 37.41199478                                      | 168.1003911                                 | 151.1371622                            |
| 238.6135041                                     | 44.70430733                                      | 153.5227008                                 | 130.272117                             |
| 327.9503546                                     | 63.56560284                                      | 228.8865248                                 | 209.2383683                            |
| 146.1367521                                     | 22.99145299                                      | 439.715812                                  | 410.4680537                            |
| 34.88976378                                     | 7.771653543                                      | 59.58267717                                 | 45.23826648                            |
| 55.29906542                                     | 13.17757009                                      | 100.7570093                                 | 83.53838763                            |
| 124.0632411                                     | 30.47826087                                      | 430.8754941                                 | 390.4550493                            |
| 257.9146067                                     | 39.91011236                                      | 102.5629213                                 | 86.48192021                            |
| 163.6151203                                     | 35.2371134                                       | 380.242268                                  | 346.2946263                            |
| 36.93370166                                     | 11.13259669                                      | 599.9337017                                 | 532.711822                             |
| 85.05442177                                     | 18.71428571                                      | 332.2108844                                 | 301.2458235                            |
| 88.63265306                                     | 20.03401361                                      | 147.8231293                                 | 127.7868481                            |
| 84.12250712                                     | 24.1965812                                       | 264.8091168                                 | 234.51209                              |
| 92.11227154                                     | 24.56657963                                      | 764.6083551                                 | 702.1447143                            |
| 115.8292683                                     | 20.52845528                                      | 363.1111111                                 | 337.0430299                            |
| 230.4518148                                     | 36.08635795                                      | 192.5607009                                 | 173.4378674                            |
| 181.1540698                                     | 42.63081395                                      | 164.1758721                                 | 137.1751601                            |
| 268.8299776                                     | 46.74496644                                      | 173.163311                                  | 156.1638315                            |
| 68.41886792                                     | 14.40377358                                      | 319.9849057                                 | 287.2578711                            |
| 33.6440678                                      | 10.72881356                                      | 147.2033898                                 | 124.3582304                            |
| 77.48333333                                     | 13.8                                             | 203.3166667                                 | 182.6899306                            |
| 164.9477124                                     | 32.54901961                                      | 1061.071895                                 | 1018.694348                            |
| 40.38461538                                     | 12.34615385                                      | 1401.865385                                 | 1313.433062                            |
| 167.4501718                                     | 34.9347079                                       | 777.2319588                                 | 734.6686653                            |
| 76.5530303                                      | 16.42424242                                      | 74.92045455                                 | 55.24585342                            |
| 263.767184                                      | 49.50332594                                      | 153.0898004                                 | 134.0388014                            |
| 126.4135021                                     | 22.66666667                                      | 81.75949367                                 | 65.89422991                            |
| 277.6619217                                     | 41.97746145                                      | 96.58244365                                 | 81.45283537                            |
| 99.20708447                                     | 22.11716621                                      | 900.2179837                                 | 856.304791                             |
| 74.12131148                                     | 18.69836066                                      | 125.6655738                                 | 105.4303252                            |
| 29.48780488                                     | 13.14634146                                      | 471.9817073                                 | 398.5869646                            |
| 187.7487179                                     | 35.44786325                                      | 265.4102564                                 | 240.1360041                            |
| 291.6666667                                     | 51.31349206                                      | 793.8541667                                 | 764.2229928                            |
| 149.9660679                                     | 29.72255489                                      | 108.6646707                                 | 88.11717882                            |
| 129.1844864                                     | 29.47798742                                      | 62.15932914                                 | 46.82315661                            |
| 68.38043478                                     | 12.19565217                                      | 39.5                                        | 29.21821834                            |
| 111.8713911                                     | 22.98425197                                      | 137.8818898                                 | 121.4804527                            |
| 63.0625                                         | 12.71428571                                      | 161.3303571                                 | 139.021604                             |
| 215.7854137                                     | 38.15287518                                      | 249.3969144                                 | 224.3828872                            |
| 49.56108597                                     | 15.80542986                                      | 144.1674208                                 | 109.9369792                            |
| 146.9427549                                     | 28.27012522                                      | 126.8604651                                 | 106.7470854                            |
| 350.3722755                                     | 52.96861378                                      | 47.67741935                                 | 36.65525091                            |
| 87.19814241                                     | 19.51393189                                      | 670.1826625                                 | 629.4679907                            |
| 296.2184133                                     | 57.48971596                                      | 186.8393732                                 | 165.8376656                            |
| 316.0379951                                     | 75.62732417                                      | 302.7978981                                 | 275.0930361                            |
| 317.4917396                                     | 49.79883382                                      | 123.9844509                                 | 106.8292369                            |
| 159.3424408                                     | 27.99817851                                      | 170.3515483                                 | 152.3238675                            |
| 101.0160428                                     | 22.43315508                                      | 417.8850267                                 | 378.2354443                            |
| 61.08391608                                     | 18.16783217                                      | 123.6678322                                 | 101.0887207                            |
| 169.7886905                                     | 38.22916667                                      | 183.2440476                                 | 159.4784226                            |
| 227.6242906                                     | 44.27582293                                      | 514.6935301                                 | 489.1457262                            |
| 94.70440252                                     | 14.19496855                                      | 172.7358491                                 | 154.3915984                            |
| 218.9807692                                     | 34.86263736                                      | 76.58379121                                 | 63.26329663                            |
| 172.1080617                                     | 30.17324185                                      | 98.22984563                                 | 80.22197835                            |
| 19.76190476                                     | 7.952380952                                      | 244.0833333                                 | 205.3178855                            |
| 256.4133333                                     | 49.70444444                                      | 86.76666667                                 | 68.3530321                             |
| 173.2446982                                     | 37.97553018                                      | 288.4665579                                 | 256.3492837                            |
| 113.8664987                                     | 19.47355164                                      | 54.44836272                                 | 41.51011681                            |
| 121.8715789                                     | 31.32421053                                      | 596.2926316                                 | 555.2517496                            |
| 30.08695652                                     | 10.41304348                                      | 80.72826087                                 | 60.7706758                             |
| 33.72058824                                     | 9.117647059                                      | 73.38235294                                 | 55.31985294                            |
| 197.5295008                                     | 39.61422088                                      | 265.9258699                                 | 242.3277343                            |
| 75.76156584                                     | 15.63345196                                      | 73.98220641                                 | 58.5185598                             |
| 68.45341615                                     | 21.22360248                                      | 151.3043478                                 | 127.7728097                            |
| 164.1571429                                     | 36.49142857                                      | 576.9614286                                 | 538.290798                             |
| 235.5650118                                     | 53.79669031                                      | 282.643026                                  | 251.699976                             |
| 150.1030928                                     | 14.8814433                                       | 14.80927835                                 | 9.618397279                            |
| 74.7752809                                      | 18.72284644                                      | 642.588015                                  | 598.9884554                            |
| 28.02857143                                     | 8.295238095                                      | 69.18095238                                 | 52.56562358                            |
| 24.72262774                                     | 9.832116788                                      | 294.4379562                                 | 252.4248495                            |
| 155.539749                                      | 21.35564854                                      | 13.66945607                                 | 7.840969171                            |

| log.sigma.4.5.mm.3D_glszm_ZonePercentage | log.sigma.4.5.mm.3D_glszm_LargeAreaLowGrayLevelEmphasis | log.sigma.4.5.mm.3D_glszm_LargeAreaHighGrayLevelEmphasis | log.sigma.4.5.mm.3D_glszm_HighGrayLevelZoneEmphasis |
|------------------------------------------|---------------------------------------------------------|----------------------------------------------------------|-----------------------------------------------------|
| 0.262676642                              | 0.852068152                                             | 16104.8481                                               | 260.1487342                                         |
| 0.1975                                   | 1.324224325                                             | 68858.59494                                              | 324.8303797                                         |
| 0.278175313                              | 0.236176034                                             | 12029.44695                                              | 215.2508039                                         |
| 0.197309417                              | 3.336821722                                             | 29878.70661                                              | 160.0785124                                         |
| 0.209694415                              | 2.83995367                                              | 15583.92965                                              | 167.6030151                                         |
| 0.145299145                              | 5.551837246                                             | 41108.60504                                              | 143.1890756                                         |
| 0.128666036                              | 27.01873058                                             | 25155.40441                                              | 102.3897059                                         |
| 0.213850416                              | 0.954532459                                             | 49998.6114                                               | 328.1917098                                         |
| 0.249136655                              | 1.154239615                                             | 21298.42178                                              | 220.4772277                                         |
| 0.256077256                              | 0.150499735                                             | 45823.25358                                              | 591.0091027                                         |
| 0.117874931                              | 9.401149691                                             | 74926.84038                                              | 124.7042254                                         |
| 0.257566766                              | 0.412717827                                             | 22947.01843                                              | 255.3456221                                         |
| 0.148514851                              | 6.17544571                                              | 117852.6161                                              | 200.7103448                                         |
| 0.201829925                              | 1.834096568                                             | 18088.26133                                              | 126.9573333                                         |
| 0.27002584                               | 0.437306487                                             | 13246.86842                                              | 257.7559809                                         |
| 0.228279387                              | 0.873258662                                             | 65335.04691                                              | 367.7633262                                         |
| 0.221183801                              | 0.399508248                                             | 52613.56338                                              | 352.3887324                                         |
| 0.174745895                              | 2.344672158                                             | 74107.59955                                              | 285.0693512                                         |
| 0.249119718                              | 0.365685291                                             | 19290.61484                                              | 271.8339223                                         |
| 0.179593244                              | 2.807500081                                             | 81664.06718                                              | 233.1401152                                         |
| 0.208776978                              | 0.713330958                                             | 78864.4397                                               | 339.9627843                                         |
| 0.217821782                              | 0.448266203                                             | 33502.05844                                              | 320.6277056                                         |
| 0.224945402                              | 0.533665832                                             | 34507.45092                                              | 312.5264293                                         |
| 0.233980583                              | 0.799234419                                             | 12520.77593                                              | 209.6224066                                         |
| 0.266129032                              | 0.535949011                                             | 12210.75036                                              | 190.0981241                                         |
| 0.295857988                              | 0.277473288                                             | 16677.4                                                  | 347.535                                             |
| 0.251469923                              | 0.465852492                                             | 15114.28597                                              | 215.8435252                                         |
| 0.283457526                              | 0.271530722                                             | 16791.1346                                               | 228.4984227                                         |
| 0.200058841                              | 0.985456758                                             | 99569.28971                                              | 329.0338235                                         |
| 0.242798354                              | 0.425830631                                             | 69273.94524                                              | 395.6284224                                         |
| 0.207387735                              | 0.43158532                                              | 61158.54482                                              | 367.6181607                                         |
| 0.2256                                   | 0.942901697                                             | 62998.55053                                              | 339.0744681                                         |
| 0.184907151                              | 0.899723912                                             | 224215.6838                                              | 600.6773504                                         |
| 0.264033264                              | 0.71798652                                              | 6852.133858                                              | 180.1102362                                         |
| 0.240990991                              | 0.877629901                                             | 14376.47196                                              | 149.6495327                                         |
| 0.1572894                                | 2.211479141                                             | 89858.3419                                               | 239.916996                                          |
| 0.249369571                              | 0.250731913                                             | 46373.96292                                              | 456.1741573                                         |
| 0.171630787                              | 1.537829548                                             | 98959.96907                                              | 262.2852234                                         |
| 0.121967655                              | 4.227050429                                             | 90673.62983                                              | 194.0110497                                         |
| 0.179706601                              | 5.504559596                                             | 24113.85374                                              | 155.4115646                                         |
| 0.223404255                              | 1.41257171                                              | 17983.44558                                              | 143.5748299                                         |
| 0.181677019                              | 2.664000557                                             | 29196.83761                                              | 175.0655271                                         |
| 0.126527915                              | 3.896245495                                             | 162621.2037                                              | 272.308094                                          |
| 0.195859873                              | 3.928008495                                             | 36879.60163                                              | 189.6747967                                         |
| 0.228677733                              | 0.506527197                                             | 80613.1164                                               | 389.0325407                                         |
| 0.192447552                              | 1.200513614                                             | 32615.21802                                              | 177.8909884                                         |
| 0.242539338                              | 0.538178064                                             | 60930.87919                                              | 403.9295302                                         |
| 0.174802111                              | 1.136804066                                             | 98363.0717                                               | 251.6641509                                         |
| 0.209219858                              | 5.507152917                                             | 6504.70339                                               | 90.95762712                                         |
| 0.220183486                              | 1.784827652                                             | 25688.9875                                               | 239.2833333                                         |
| 0.153614458                              | 4.022467572                                             | 288559.5441                                              | 352.6176471                                         |
| 0.106339468                              | 5.969574062                                             | 338606.9904                                              | 265.7355769                                         |
| 0.153278904                              | 5.886906671                                             | 111746.4828                                              | 260.5927835                                         |
| 0.225448335                              | 0.208908274                                             | 30305.27273                                              | 406.0378788                                         |
| 0.229108458                              | 0.6609533                                               | 40625.90022                                              | 292.8026608                                         |
| 0.251059322                              | 0.336212875                                             | 24145.94937                                              | 338.4894515                                         |
| 0.257090576                              | 0.237541481                                             | 43456.78292                                              | 483.3855279                                         |
| 0.150904605                              | 7.49215595                                              | 113381.951                                               | 234.7247956                                         |
| 0.222303207                              | 0.57568214                                              | 30456.51148                                              | 253.6                                               |
| 0.116725979                              | 3.87335336                                              | 62622.43902                                              | 122.1768293                                         |
| 0.198911935                              | 1.898467289                                             | 45797.2547                                               | 244.7487179                                         |
| 0.183706944                              | 2.121321119                                             | 305114.5119                                              | 421.8670635                                         |
| 0.220607662                              | 0.447818927                                             | 30166.6507                                               | 305.6966068                                         |
| 0.255353319                              | 0.365982098                                             | 14456.38994                                              | 185.8574423                                         |
| 0.311864407                              | 0.274126439                                             | 7498.304348                                              | 176.6630435                                         |
| 0.246921581                              | 1.853191154                                             | 12854.69291                                              | 210.2624672                                         |
| 0.211720227                              | 2.0153395                                               | 16278.51339                                              | 230.9910714                                         |
| 0.199943915                              | 1.820414297                                             | 40730.82328                                              | 241.3225806                                         |
| 0.17092034                               | 0.755387128                                             | 33353.86878                                              | 197.0542986                                         |
| 0.222975668                              | 0.40637715                                              | 43189.13596                                              | 409.6189624                                         |
| 0.301207983                              | 0.197927308                                             | 18585.74106                                              | 365.1089799                                         |
| 0.156720039                              | 4.170493709                                             | 112485.7647                                              | 242.8266254                                         |
| 0.218209019                              | 0.718967724                                             | 56070.6856                                               | 382.1743389                                         |
| 0.189986177                              | 0.864780069                                             | 112131.6653                                              | 329.0751819                                         |
| 0.241435946                              | 0.476690988                                             | 36737.12536                                              | 391.3731778                                         |
| 0.235521236                              | 0.709268121                                             | 46596.87978                                              | 322.6593807                                         |
| 0.15881104                               | 1.890306034                                             | 98301.82353                                              | 227.184492                                          |
| 0.210448859                              | 0.722579268                                             | 24382.51399                                              | 239.5944056                                         |
| 0.205128205                              | 0.575830159                                             | 62258.37946                                              | 311.6443452                                         |
| 0.19784415                               | 1.500553191                                             | 181978.9489                                              | 344.4597049                                         |
| 0.233480176                              | 0.261274315                                             | 118119.1918                                              | 699.9213836                                         |
| 0.273993225                              | 0.202787392                                             | 32565.39835                                              | 400.9299451                                         |
| 0.235650768                              | 0.311833123                                             | 34092.80274                                              | 417.9468268                                         |
| 0.160611855                              | 5.323572388                                             | 13616.16667                                              | 92.79761905                                         |
| 0.233039876                              | 0.315551288                                             | 29885.96889                                              | 334.7733333                                         |
| 0.176453656                              | 4.363118097                                             | 27202.92822                                              | 143.7601958                                         |
| 0.278011204                              | 0.207625447                                             | 16875.7733                                               | 345.3274559                                         |
| 0.156095958                              | 5.838258937                                             | 67864.59368                                              | 168.7452632                                         |
| 0.223844282                              | 1.773395027                                             | 6095.293478                                              | 61.41304348                                         |
| 0.235294118                              | 0.886393434                                             | 9756.375                                                 | 134.9264706                                         |
| 0.205854874                              | 1.312607371                                             | 57999.27534                                              | 329.0877458                                         |
| 0.254298643                              | 0.489838912                                             | 13583.80071                                              | 206.7900356                                         |
| 0.206145967                              | 0.753210835                                             | 33457.11491                                              | 190.5990062                                         |
| 0.160808638                              | 1.747542117                                             | 195906.3471                                              | 373.9157143                                         |
| 0.179770506                              | 2.079976722                                             | 44874.48227                                              | 180.9420804                                         |
| 0.438914027                              | 0.049818444                                             | 9412.458763                                              | 484.0798969                                         |
| 0.151446398                              | 3.875097758                                             | 110872.161                                               | 223.1685393                                         |
| 0.245327103                              | 2.322969578                                             | 3667.390476                                              | 107.3047619                                         |
| 0.154279279                              | 5.878203413                                             | 17656.21898                                              | 102.8175182                                         |
| 0.414211438                              | 0.078413541                                             | 5305.937238                                              | 322.6485356                                         |

| log.sigma.4.5.mm.3D_glszm_SmallAreaEmphasis | log.sigma.4.5.mm.3D_glszm_LowGrayLevelZoneEmphasis | log.sigma.4.5.mm.3D_glszm_ZoneEntropy | log.sigma.4.5.mm.3D_glszm_SmallAreaLowGrayLevelEmphasis |
|---------------------------------------------|----------------------------------------------------|---------------------------------------|---------------------------------------------------------|
| 0.600802858                                 | 0.01315124                                         | 6.248117083                           | 0.00592851                                              |
| 0.525403373                                 | 0.008205934                                        | 6.422742064                           | 0.005442553                                             |
| 0.507853682                                 | 0.012784987                                        | 6.431690669                           | 0.008059677                                             |
| 0.529565027                                 | 0.018284301                                        | 6.407820773                           | 0.010593965                                             |
| 0.543800148                                 | 0.019413109                                        | 5.849007144                           | 0.008057234                                             |
| 0.512993217                                 | 0.023048228                                        | 6.2672115                             | 0.012445903                                             |
| 0.521092389                                 | 0.029027725                                        | 5.4772968387                          | 0.012452524                                             |
| 0.560651836                                 | 0.009347828                                        | 6.433148424                           | 0.006523706                                             |
| 0.58489908                                  | 0.01116534                                         | 6.349894701                           | 0.007990368                                             |
| 0.529725127                                 | 0.003699563                                        | 6.788617674                           | 0.002567964                                             |
| 0.475945452                                 | 0.021971473                                        | 6.188365255                           | 0.013161559                                             |
| 0.559696646                                 | 0.00958809                                         | 6.423792117                           | 0.0050704                                               |
| 0.528027782                                 | 0.012082962                                        | 6.461431828                           | 0.007845756                                             |
| 0.507527251                                 | 0.028350768                                        | 6.413920345                           | 0.014484487                                             |
| 0.567520402                                 | 0.010954052                                        | 6.48144499                            | 0.00818873                                              |
| 0.553120706                                 | 0.006493279                                        | 6.800759705                           | 0.003137644                                             |
| 0.527861424                                 | 0.009347412                                        | 6.602795342                           | 0.007184256                                             |
| 0.536042962                                 | 0.008140818                                        | 6.495078375                           | 0.005651995                                             |
| 0.590831385                                 | 0.008990629                                        | 6.049549479                           | 0.006823339                                             |
| 0.51546787                                  | 0.013299463                                        | 6.648721672                           | 0.004800191                                             |
| 0.529196251                                 | 0.005717102                                        | 6.918888267                           | 0.003594331                                             |
| 0.543276946                                 | 0.007443967                                        | 6.623792257                           | 0.005006875                                             |
| 0.514428685                                 | 0.007019113                                        | 6.954242394                           | 0.003480958                                             |
| 0.503004198                                 | 0.020068918                                        | 6.340136125                           | 0.010114527                                             |
| 0.513532202                                 | 0.015214666                                        | 6.654185796                           | 0.007393553                                             |
| 0.574745658                                 | 0.008403036                                        | 6.474548599                           | 0.006078694                                             |
| 0.577701793                                 | 0.012058529                                        | 6.431020284                           | 0.008753707                                             |
| 0.541026083                                 | 0.009871673                                        | 6.647631298                           | 0.005185562                                             |
| 0.580090229                                 | 0.010326665                                        | 6.646997528                           | 0.008220324                                             |
| 0.573560317                                 | 0.005867908                                        | 6.675760659                           | 0.004426759                                             |
| 0.543597452                                 | 0.005976442                                        | 6.829658812                           | 0.00387078                                              |
| 0.555702925                                 | 0.005674952                                        | 6.697380677                           | 0.002586346                                             |
| 0.579776285                                 | 0.005791155                                        | 6.70148972                            | 0.004194605                                             |
| 0.535947139                                 | 0.022644469                                        | 5.835774132                           | 0.012252493                                             |
| 0.517835044                                 | 0.022207394                                        | 6.1483882                             | 0.010043763                                             |
| 0.501405697                                 | 0.00925921                                         | 6.587541865                           | 0.004521221                                             |
| 0.555015281                                 | 0.005420143                                        | 6.911036296                           | 0.003769431                                             |
| 0.549050543                                 | 0.009397076                                        | 6.609652064                           | 0.005370247                                             |
| 0.457684958                                 | 0.017901081                                        | 6.408933164                           | 0.013079735                                             |
| 0.556183877                                 | 0.022698558                                        | 6.162397445                           | 0.015228156                                             |
| 0.568068158                                 | 0.021658849                                        | 6.008906703                           | 0.015600155                                             |
| 0.501929183                                 | 0.01366774                                         | 6.451467648                           | 0.009190516                                             |
| 0.503839831                                 | 0.012297729                                        | 6.585060532                           | 0.009732808                                             |
| 0.579978047                                 | 0.018985022                                        | 6.304171989                           | 0.011733588                                             |
| 0.552946015                                 | 0.006647716                                        | 6.88321923                            | 0.004312926                                             |
| 0.526648291                                 | 0.014656617                                        | 6.623988929                           | 0.005872286                                             |
| 0.566765444                                 | 0.005584489                                        | 6.744605429                           | 0.002731977                                             |
| 0.518431433                                 | 0.016639425                                        | 6.419558399                           | 0.008796297                                             |
| 0.549845535                                 | 0.034507632                                        | 5.341235916                           | 0.016196555                                             |
| 0.587759652                                 | 0.012451777                                        | 6.070215177                           | 0.009347964                                             |
| 0.534834626                                 | 0.007182711                                        | 6.764277807                           | 0.003797269                                             |
| 0.437049843                                 | 0.012915508                                        | 6.405741084                           | 0.008832755                                             |
| 0.554437257                                 | 0.008776037                                        | 6.512629175                           | 0.00560937                                              |
| 0.556722225                                 | 0.007157743                                        | 6.212372275                           | 0.005880301                                             |
| 0.557773021                                 | 0.007037426                                        | 6.661960811                           | 0.004441112                                             |
| 0.52793324                                  | 0.008345764                                        | 6.730194761                           | 0.005565501                                             |
| 0.594399324                                 | 0.006403593                                        | 6.701204974                           | 0.004788064                                             |
| 0.534754228                                 | 0.011630851                                        | 6.415221992                           | 0.007304573                                             |
| 0.500536431                                 | 0.011274464                                        | 6.348858632                           | 0.005213928                                             |
| 0.420597817                                 | 0.020619763                                        | 6.152649642                           | 0.008048602                                             |
| 0.586559149                                 | 0.009084028                                        | 6.335164185                           | 0.006283875                                             |
| 0.554416739                                 | 0.005572739                                        | 6.801807238                           | 0.00374121                                              |
| 0.566643269                                 | 0.008128679                                        | 6.459226734                           | 0.005160336                                             |
| 0.534172115                                 | 0.013448258                                        | 6.43676992                            | 0.009519331                                             |
| 0.632743939                                 | 0.015645889                                        | 5.633497329                           | 0.012924107                                             |
| 0.557178912                                 | 0.011968611                                        | 6.271672631                           | 0.00564005                                              |
| 0.545111173                                 | 0.015351662                                        | 6.181678986                           | 0.009975829                                             |
| 0.569878334                                 | 0.01129062                                         | 6.596578228                           | 0.007573175                                             |
| 0.486580836                                 | 0.013843472                                        | 6.309561298                           | 0.009945449                                             |
| 0.527016094                                 | 0.006056                                           | 6.801929657                           | 0.003988257                                             |
| 0.568774294                                 | 0.008039434                                        | 6.805007232                           | 0.005477774                                             |
| 0.533574853                                 | 0.011520546                                        | 6.33318852                            | 0.008648707                                             |
| 0.555907917                                 | 0.005164681                                        | 6.685954739                           | 0.002497726                                             |
| 0.517722957                                 | 0.00543981                                         | 6.825024291                           | 0.003175995                                             |
| 0.574249709                                 | 0.006320235                                        | 6.829204678                           | 0.00406178                                              |
| 0.549433765                                 | 0.00851644                                         | 6.624413388                           | 0.004055057                                             |
| 0.533684577                                 | 0.011942113                                        | 6.440904473                           | 0.008011436                                             |
| 0.465858993                                 | 0.01214306                                         | 6.42211686                            | 0.007568027                                             |
| 0.512744943                                 | 0.006923387                                        | 6.732528728                           | 0.004495927                                             |
| 0.521060515                                 | 0.006323864                                        | 6.913999421                           | 0.00397167                                              |
| 0.560849148                                 | 0.005563927                                        | 6.614548677                           | 0.004685387                                             |
| 0.56405884                                  | 0.00607169                                         | 6.692460538                           | 0.003168385                                             |
| 0.561992312                                 | 0.006019902                                        | 6.666302416                           | 0.004366846                                             |
| 0.496588752                                 | 0.030661376                                        | 5.344815269                           | 0.015470418                                             |
| 0.55022403                                  | 0.008000284                                        | 6.77159084                            | 0.004671325                                             |
| 0.549952287                                 | 0.020659834                                        | 6.498991175                           | 0.01196634                                              |
| 0.550250936                                 | 0.008187318                                        | 6.52723111                            | 0.005544095                                             |
| 0.521256896                                 | 0.016354248                                        | 6.482729579                           | 0.010869771                                             |
| 0.590208143                                 | 0.041232992                                        | 4.866667519                           | 0.032400154                                             |
| 0.489495616                                 | 0.026395958                                        | 5.797468794                           | 0.010848163                                             |
| 0.564795786                                 | 0.005957524                                        | 6.539290494                           | 0.004205111                                             |
| 0.527235455                                 | 0.024964212                                        | 6.33593949                            | 0.02117842                                              |
| 0.460774443                                 | 0.013436066                                        | 6.509547993                           | 0.005638109                                             |
| 0.493746006                                 | 0.005685525                                        | 6.921671815                           | 0.003492404                                             |
| 0.545683557                                 | 0.01427549                                         | 6.622304973                           | 0.00862604                                              |
| 0.645291979                                 | 0.010807359                                        | 6.427365346                           | 0.008675519                                             |
| 0.545592121                                 | 0.01173882                                         | 6.072407363                           | 0.00882515                                              |
| 0.527755593                                 | 0.040764204                                        | 5.528497961                           | 0.03219084                                              |
| 0.407875214                                 | 0.030532859                                        | 6.072882652                           | 0.019308723                                             |
| 0.582427585                                 | 0.013148787                                        | 6.502620699                           | 0.009053134                                             |

| log.sigma.4.5.mm.3D_ngtdm_Coarseness | log.sigma.4.5.mm.3D_ngtdm_Complexity | log.sigma.4.5.mm.3D_ngtdm_Strength | log.sigma.4.5.mm.3D_ngtdm_Busyness | log.sigma.4.5.mm.3D_ngtdm_Contrast |
|--------------------------------------|--------------------------------------|------------------------------------|------------------------------------|------------------------------------|
| 0.011749571                          | 0.366593921                          | 2.862536046                        | 0.244946652                        | 8.65E-05                           |
| 0.006299126                          | 0.238948572                          | 2.327661777                        | 0.269254496                        | 2.45E-05                           |
| 0.011763682                          | 0.401037399                          | 3.595942136                        | 0.167421119                        | 5.32E-05                           |
| 0.00550276                           | 0.120275678                          | 1.249816798                        | 0.655800221                        | 2.55E-05                           |
| 0.013920054                          | 0.196556935                          | 2.14336276                         | 0.368816666                        | 9.02E-05                           |
| 0.008248599                          | 0.11683048                           | 1.471633857                        | 0.547261138                        | 3.71E-05                           |
| 0.013998001                          | 0.08678233                           | 1.51587041                         | 0.652011731                        | 7.15E-05                           |
| 0.008261921                          | 0.278934248                          | 3.191584989                        | 0.203746234                        | 2.95E-05                           |
| 0.006256431                          | 0.215085864                          | 1.724979171                        | 0.422888833                        | 3.56E-05                           |
| 0.004657517                          | 0.24746024                           | 2.583729377                        | 0.215707138                        | 1.67E-05                           |
| 0.007070988                          | 0.086101369                          | 1.003035675                        | 0.675736235                        | 2.86E-05                           |
| 0.007510338                          | 0.272573182                          | 2.256581222                        | 0.255491623                        | 3.18E-05                           |
| 0.004659341                          | 0.085284771                          | 1.129421617                        | 0.570649455                        | 1.27E-05                           |
| 0.006973089                          | 0.105341903                          | 0.983915419                        | 0.670328562                        | 4.17E-05                           |
| 0.00796531                           | 0.39380207                           | 2.65773776                         | 0.274619497                        | 5.55E-05                           |
| 0.003983915                          | 0.126378494                          | 1.594369546                        | 0.366265945                        | 1.23E-05                           |
| 0.009498161                          | 0.301258609                          | 3.900754868                        | 0.139933063                        | 2.66E-05                           |
| 0.004968749                          | 0.18838398                           | 1.855561048                        | 0.391205395                        | 1.93E-05                           |
| 0.009561413                          | 0.296064981                          | 2.011567321                        | 0.258324984                        | 6.09E-05                           |
| 0.004956548                          | 0.110378068                          | 1.328689698                        | 0.469815166                        | 1.87E-05                           |
| 0.002117565                          | 0.09437724                           | 1.126457107                        | 0.53301007                         | 4.74E-06                           |
| 0.006529937                          | 0.261728152                          | 2.973469103                        | 0.225352091                        | 1.98E-05                           |
| 0.003417745                          | 0.134736181                          | 1.468841752                        | 0.453919269                        | 1.10E-05                           |
| 0.014550582                          | 0.223755839                          | 2.558762733                        | 0.267741144                        | 9.15E-05                           |
| 0.005648314                          | 0.113904485                          | 1.139524983                        | 0.523430052                        | 3.50E-05                           |
| 0.008684833                          | 0.475953061                          | 3.324444787                        | 0.189279976                        | 5.45E-05                           |
| 0.006581063                          | 0.141195892                          | 1.579130338                        | 0.458247254                        | 3.06E-05                           |
| 0.003562687                          | 0.136268606                          | 0.987667701                        | 0.575610744                        | 2.11E-05                           |
| 0.003792921                          | 0.148571948                          | 1.506302212                        | 0.371008028                        | 1.35E-05                           |
| 0.004513374                          | 0.237428658                          | 2.517992377                        | 0.227381655                        | 1.12E-05                           |
| 0.003819841                          | 0.101611481                          | 1.364921872                        | 0.399259776                        | 1.27E-05                           |
| 0.002531504                          | 0.122453472                          | 1.106156295                        | 0.562336535                        | 9.72E-06                           |
| 0.005921082                          | 0.28261158                           | 4.0917053                          | 0.14813796                         | 1.48E-05                           |
| 0.026288871                          | 0.579480265                          | 4.256576862                        | 0.155695526                        | 0.000217809                        |
| 0.014222513                          | 0.257857291                          | 2.202882346                        | 0.279499262                        | 9.72E-05                           |
| 0.004066972                          | 0.090096664                          | 0.943894864                        | 0.588159475                        | 1.51E-05                           |
| 0.003837611                          | 0.247637234                          | 2.206240083                        | 0.270466665                        | 1.56E-05                           |
| 0.0038032                            | 0.102300755                          | 1.13428677                         | 0.497183726                        | 1.25E-05                           |
| 0.009924081                          | 0.139062239                          | 2.236221713                        | 0.272378503                        | 2.25E-05                           |
| 0.007963607                          | 0.140553242                          | 1.635301386                        | 0.574545694                        | 4.10E-05                           |
| 0.008389907                          | 0.16972623                           | 1.226802891                        | 0.518769482                        | 5.83E-05                           |
| 0.006587398                          | 0.126259337                          | 1.197784589                        | 0.555872611                        | 2.89E-05                           |
| 0.004050596                          | 0.111770069                          | 1.334343799                        | 0.449325264                        | 1.32E-05                           |
| 0.006887169                          | 0.142857895                          | 1.374910111                        | 0.54156088                         | 3.77E-05                           |
| 0.004375305                          | 0.191900909                          | 1.755625149                        | 0.283746965                        | 1.92E-05                           |
| 0.003949371                          | 0.087766881                          | 0.93916285                         | 0.730569245                        | 1.78E-05                           |
| 0.00379014                           | 0.176734241                          | 1.884586969                        | 0.31682829                         | 1.22E-05                           |
| 0.009251385                          | 0.224821221                          | 2.98271319                         | 0.176113599                        | 2.98E-05                           |
| 0.021591542                          | 0.177703928                          | 1.803868859                        | 0.558410792                        | 0.000217984                        |
| 0.013095535                          | 0.282544045                          | 3.187573407                        | 0.227477508                        | 5.84E-05                           |
| 0.003815041                          | 0.105823754                          | 1.54682996                         | 0.384665232                        | 8.70E-06                           |
| 0.006842244                          | 0.134508042                          | 2.145033032                        | 0.265561994                        | 1.36E-05                           |
| 0.003848583                          | 0.104748315                          | 1.206318134                        | 0.592777087                        | 1.28E-05                           |
| 0.011035756                          | 0.352982429                          | 3.190082353                        | 0.157069144                        | 5.45E-05                           |
| 0.003390811                          | 0.117615312                          | 1.027492759                        | 0.577377807                        | 1.59E-05                           |
| 0.008166722                          | 0.282493436                          | 2.865994537                        | 0.208616486                        | 3.44E-05                           |
| 0.004086593                          | 0.234489217                          | 2.260487045                        | 0.251736798                        | 1.47E-05                           |
| 0.005337476                          | 0.144539841                          | 1.767202201                        | 0.438509163                        | 1.89E-05                           |
| 0.009539186                          | 0.243222567                          | 2.42638894                         | 0.230607074                        | 4.06E-05                           |
| 0.008717936                          | 0.085620553                          | 1.109306208                        | 0.497561033                        | 2.95E-05                           |
| 0.004770841                          | 0.1258136                            | 1.200147943                        | 0.561758111                        | 2.34E-05                           |
| 0.002536626                          | 0.13094615                           | 1.531935341                        | 0.39032613                         | 6.03E-06                           |
| 0.005514116                          | 0.211325618                          | 1.951438177                        | 0.299395482                        | 2.14E-05                           |
| 0.006255585                          | 0.162661935                          | 1.124814322                        | 0.527782811                        | 5.50E-05                           |
| 0.018695077                          | 0.479013742                          | 2.843620183                        | 0.184971575                        | 0.000174482                        |
| 0.008057508                          | 0.250417025                          | 2.030383003                        | 0.463991118                        | 6.02E-05                           |
| 0.014613832                          | 0.305647131                          | 3.967035241                        | 0.240269905                        | 7.07E-05                           |
| 0.003952469                          | 0.114852543                          | 1.054402541                        | 0.689264309                        | 2.19E-05                           |
| 0.01023938                           | 0.189890603                          | 2.026592818                        | 0.289700972                        | 4.54E-05                           |
| 0.00563584                           | 0.228220705                          | 2.464173245                        | 0.241428301                        | 2.04E-05                           |
| 0.003751211                          | 0.187291851                          | 1.511161173                        | 0.383695845                        | 2.36E-05                           |
| 0.005979261                          | 0.156424438                          | 1.560521695                        | 0.397869022                        | 2.35E-05                           |
| 0.002885212                          | 0.129380551                          | 1.396695708                        | 0.44867955                         | 9.43E-06                           |
| 0.002048129                          | 0.076192773                          | 0.807538441                        | 0.673904042                        | 6.24E-06                           |
| 0.003471489                          | 0.215818314                          | 2.317951498                        | 0.321054544                        | 1.01E-05                           |
| 0.006056154                          | 0.310680396                          | 3.102618197                        | 0.214765369                        | 2.02E-05                           |
| 0.005634779                          | 0.150244504                          | 1.768487385                        | 0.324222828                        | 1.50E-05                           |
| 0.007673425                          | 0.271096396                          | 1.91646799                         | 0.330293609                        | 5.44E-05                           |
| 0.003782291                          | 0.148895075                          | 1.336550504                        | 0.404875679                        | 1.50E-05                           |
| 0.00342474                           | 0.09795015                           | 1.307481768                        | 0.398802048                        | 9.51E-06                           |
| 0.009931125                          | 0.657816389                          | 7.095152034                        | 0.072103188                        | 3.06E-05                           |
| 0.005424553                          | 0.270687656                          | 2.710026646                        | 0.207660972                        | 1.95E-05                           |
| 0.005515697                          | 0.274514087                          | 2.737041712                        | 0.221919784                        | 1.84E-05                           |
| 0.021686647                          | 0.164079127                          | 1.635699845                        | 0.429542289                        | 0.000152403                        |
| 0.003553735                          | 0.13073231                           | 1.353921554                        | 0.434020463                        | 1.45E-05                           |
| 0.004127188                          | 0.084301978                          | 0.947396308                        | 1.008762149                        | 1.89E-05                           |
| 0.00981044                           | 0.370620081                          | 3.302058493                        | 0.175839489                        | 5.19E-05                           |
| 0.004218195                          | 0.078202001                          | 0.784665992                        | 0.87232895                         | 1.93E-05                           |
| 0.018970033                          | 0.21063675                           | 1.138103658                        | 0.538841779                        | 0.000281473                        |
| 0.021887338                          | 0.305834968                          | 2.858589711                        | 0.234291768                        | 0.000166753                        |
| 0.004079425                          | 0.131182101                          | 1.204833627                        | 0.495621157                        | 1.77E-05                           |
| 0.01090694                           | 0.311933464                          | 2.261624148                        | 0.27725015                         | 7.90E-05                           |
| 0.008135744                          | 0.166316106                          | 1.765801842                        | 0.309566094                        | 3.26E-05                           |
| 0.003232215                          | 0.095007903                          | 1.261375612                        | 0.443765968                        | 8.87E-06                           |
| 0.002777725                          | 0.060687414                          | 0.623553731                        | 1.024892361                        | 1.08E-05                           |
| 0.013428921                          | 1.449994127                          | 7.348712101                        | 0.076146889                        | 0.000162014                        |
| 0.007203125                          | 0.139951311                          | 1.716875371                        | 0.348030018                        | 2.20E-05                           |
| 0.031748764                          | 0.298069191                          | 3.248050758                        | 0.285224264                        | 0.00024887                         |
| 0.015342751                          | 0.124948076                          | 1.764786732                        | 0.477237819                        | 6.58E-05                           |
| 0.010958679                          | 0.678712527                          | 4.395930278                        | 0.145236593                        | 9.87E-05                           |

| log.sigma.4.0.mm.3D_gldm_GrayLevelVariance | log.sigma.4.0.mm.3D_gldm_HighGrayLevelEmphasis | log.sigma.4.0.mm.3D_gldm_GrayLevelNonUniformityNormalized | log.sigma.4.0.mm.3D_gldm_DependenceEntropy |
|--------------------------------------------|------------------------------------------------|-----------------------------------------------------------|--------------------------------------------|
| 25.44284343                                | 215.2776392                                    | 0.059931219                                               | 6.913864788                                |
| 17.10544975                                | 258.9235                                       | 0.075141                                                  | 6.862783008                                |
| 19.17144082                                | 204.2093023                                    | 0.069468224                                               | 6.692849971                                |
| 15.75694978                                | 174.6628618                                    | 0.075438463                                               | 6.864750755                                |
| 15.14143111                                | 105.2813488                                    | 0.095610598                                               | 6.618241309                                |
| 13.24689457                                | 134.6636142                                    | 0.092262371                                               | 6.717154926                                |
| 11.77887472                                | 82.75591296                                    | 0.11819299                                                | 6.65825149                                 |
| 20.38515235                                | 319.4930748                                    | 0.06989664                                                | 6.955146524                                |
| 19.06497751                                | 200.1114948                                    | 0.06884197                                                | 6.97647341                                 |
| 21.42923566                                | 575.5511156                                    | 0.063858109                                               | 6.91190591                                 |
| 9.807371505                                | 153.6480354                                    | 0.099603124                                               | 6.761174045                                |
| 17.03704919                                | 244.3038576                                    | 0.071568474                                               | 6.731329912                                |
| 11.26309456                                | 193.112325                                     | 0.098371018                                               | 6.928320948                                |
| 13.90444515                                | 142.0522067                                    | 0.077303975                                               | 6.70436351                                 |
| 23.74967283                                | 234.5245478                                    | 0.063005362                                               | 7.033788096                                |
| 21.71067185                                | 374.1338525                                    | 0.069149563                                               | 7.296372307                                |
| 17.93986316                                | 367.2454829                                    | 0.077817956                                               | 6.853019441                                |
| 16.54006548                                | 300.7353401                                    | 0.075419922                                               | 7.014945722                                |
| 14.4166584                                 | 257.9524648                                    | 0.076237354                                               | 6.689196857                                |
| 16.49638507                                | 238.2609445                                    | 0.076211284                                               | 6.954710262                                |
| 18.08330285                                | 355.2046043                                    | 0.070928751                                               | 7.06379059                                 |
| 17.90720442                                | 370.2347949                                    | 0.072192247                                               | 6.934269353                                |
| 19.0122859                                 | 287.340694                                     | 0.069652947                                               | 6.968841615                                |
| 20.19822415                                | 203.4194175                                    | 0.070040532                                               | 6.744941178                                |
| 21.44453927                                | 199.3759601                                    | 0.062345594                                               | 6.923686765                                |
| 23.42354084                                | 350.7337278                                    | 0.064291123                                               | 6.833263059                                |
| 17.78922828                                | 203.813659                                     | 0.069187593                                               | 6.800385853                                |
| 19.26687032                                | 278.4816692                                    | 0.066828832                                               | 6.717234371                                |
| 16.72465129                                | 329.9282142                                    | 0.080546595                                               | 6.899791326                                |
| 17.9318971                                 | 361.9116809                                    | 0.074246131                                               | 6.89903127                                 |
| 19.72084902                                | 415.8865282                                    | 0.068593539                                               | 7.068765766                                |
| 18.472551                                  | 316.2766                                       | 0.06944792                                                | 6.996703238                                |
| 20.69799582                                | 506.9083366                                    | 0.073812032                                               | 6.907357089                                |
| 18.62267193                                | 160.5841996                                    | 0.078193188                                               | 6.514138891                                |
| 16.93174255                                | 234.1621622                                    | 0.072650353                                               | 6.767006609                                |
| 13.35673159                                | 289.6375505                                    | 0.083882262                                               | 6.829070963                                |
| 26.18537339                                | 448.8800785                                    | 0.059823465                                               | 7.036579814                                |
| 13.59635829                                | 364.6254792                                    | 0.085486666                                               | 6.829663774                                |
| 10.74172848                                | 199.0822102                                    | 0.099357205                                               | 6.812137083                                |
| 15.36127086                                | 132.0171149                                    | 0.085001435                                               | 6.839131209                                |
| 12.76594821                                | 160.2887538                                    | 0.081442106                                               | 6.631480729                                |
| 12.98644278                                | 168.615942                                     | 0.082617483                                               | 6.816888686                                |
| 13.11903954                                | 252.6987116                                    | 0.084117843                                               | 6.957693392                                |
| 15.63222871                                | 167.037155                                     | 0.086442542                                               | 6.867806765                                |
| 25.33045545                                | 497.416142                                     | 0.064751939                                               | 7.265750875                                |
| 17.64254925                                | 202.3591608                                    | 0.067367832                                               | 6.943713954                                |
| 20.85566753                                | 341.6698318                                    | 0.068133622                                               | 7.131237632                                |
| 16.79009257                                | 360.0903694                                    | 0.090057853                                               | 6.786989051                                |
| 12.7437849                                 | 88.93439716                                    | 0.092764448                                               | 6.409273218                                |
| 17.11206885                                | 176.033945                                     | 0.083296019                                               | 6.860273035                                |
| 14.88248753                                | 315.5532129                                    | 0.085409157                                               | 7.015140579                                |
| 9.521604909                                | 274.4821063                                    | 0.118763618                                               | 6.695667576                                |
| 16.56004363                                | 197.8548854                                    | 0.075129035                                               | 7.025192172                                |
| 16.32531991                                | 414.6532878                                    | 0.072914243                                               | 6.657887181                                |
| 18.533479                                  | 305.9380239                                    | 0.066491165                                               | 6.918283681                                |
| 23.51608032                                | 340.028072                                     | 0.061150038                                               | 6.991948412                                |
| 22.75154794                                | 614.936871                                     | 0.066400815                                               | 7.032444121                                |
| 15.46269027                                | 200.5546875                                    | 0.105163743                                               | 6.9881885                                  |
| 15.98573511                                | 352.2215743                                    | 0.077024667                                               | 6.693647814                                |
| 6.668638948                                | 128.6099644                                    | 0.112323299                                               | 6.404684577                                |
| 18.49999162                                | 246.7143829                                    | 0.067271898                                               | 7.176341845                                |
| 18.16731729                                | 457.6759614                                    | 0.077098415                                               | 7.047765606                                |
| 17.09416356                                | 318.898723                                     | 0.072753716                                               | 7.008426947                                |
| 17.23581514                                | 230.6804069                                    | 0.067354956                                               | 6.586323748                                |
| 15.24245906                                | 163.3389831                                    | 0.073323758                                               | 6.401948319                                |
| 22.25821461                                | 201.6584576                                    | 0.067312543                                               | 6.764681395                                |
| 19.90015491                                | 178.4338374                                    | 0.074017031                                               | 6.965076577                                |
| 21.33396014                                | 264.8199663                                    | 0.065284426                                               | 7.034064491                                |
| 13.19176552                                | 265.2227378                                    | 0.080882305                                               | 6.75898415                                 |
| 21.23929917                                | 452.2281611                                    | 0.06740202                                                | 7.060031751                                |
| 30.72611729                                | 437.2652311                                    | 0.05244722                                                | 7.166432603                                |
| 13.70264478                                | 231.5264435                                    | 0.091849959                                               | 6.73598204                                 |
| 19.44025136                                | 310.0192349                                    | 0.0706234                                                 | 7.083022978                                |
| 15.69707651                                | 377.6782368                                    | 0.075523739                                               | 6.924201993                                |
| 25.1575073                                 | 372.1726889                                    | 0.060327194                                               | 7.120517135                                |
| 22.62181026                                | 343.4174174                                    | 0.067668514                                               | 7.037242047                                |
| 12.22311584                                | 270.1562633                                    | 0.091433594                                               | 6.804995266                                |
| 15.55458202                                | 231.7895511                                    | 0.077340662                                               | 6.710530506                                |
| 16.97816137                                | 355.3315018                                    | 0.076433335                                               | 6.83665945                                 |
| 17.78307375                                | 399.369863                                     | 0.08020446                                                | 6.970333791                                |
| 23.0269778                                 | 706.7995595                                    | 0.077446141                                               | 6.867554029                                |
| 24.67669257                                | 456.8690252                                    | 0.065213016                                               | 6.966959425                                |
| 20.25216104                                | 369.8544867                                    | 0.067856557                                               | 6.897419865                                |
| 8.635449989                                | 82.04397706                                    | 0.118382329                                               | 6.429117645                                |
| 20.62590523                                | 364.7850854                                    | 0.065094813                                               | 7.015357667                                |
| 15.77120382                                | 121.3802533                                    | 0.07324946                                                | 7.051594171                                |
| 24.10307456                                | 323.7226891                                    | 0.062659377                                               | 7.013008204                                |
| 13.6260857                                 | 222.3397963                                    | 0.081243765                                               | 6.823293307                                |
| 7.771727612                                | 67.90024331                                    | 0.104457113                                               | 5.961240977                                |
| 14.77396104                                | 180.9965398                                    | 0.084194394                                               | 6.517673871                                |
| 16.77549621                                | 313.8788539                                    | 0.072080063                                               | 6.830605952                                |
| 18.70428861                                | 258.8561086                                    | 0.067273807                                               | 6.717895373                                |
| 13.50059799                                | 240.7919334                                    | 0.084569341                                               | 6.595546155                                |
| 15.87246969                                | 392.1504709                                    | 0.082563369                                               | 6.958032014                                |
| 13.48023872                                | 186.9290268                                    | 0.080078619                                               | 6.986475246                                |
| 51.21791118                                | 598.9049774                                    | 0.045829836                                               | 6.813992943                                |
| 10.50895752                                | 254.9177538                                    | 0.103905225                                               | 6.662845317                                |
| 14.52849594                                | 101.7850467                                    | 0.07988689                                                | 6.434046453                                |
| 9.596522198                                | 78.74099099                                    | 0.107922957                                               | 6.659827205                                |
| 36.59906241                                | 385.8743501                                    | 0.049815426                                               | 6.803956267                                |

| log.sigma.4.0.mm.3D_gldm_DependenceNonUniformity | log.sigma.4.0.mm.3D_gldm_GrayLevelNonUniformity | log.sigma.4.0.mm.3D_gldm_SmallDependenceEmphasis |
|--------------------------------------------------|-------------------------------------------------|--------------------------------------------------|
| 174.8004988                                      | 72.09725686                                     | 0.242360261                                      |
| 273.185                                          | 150.282                                         | 0.193365474                                      |
| 182.842576                                       | 77.66547406                                     | 0.242312549                                      |
| 334.4651447                                      | 185.0505503                                     | 0.194041625                                      |
| 102.1928346                                      | 90.73445732                                     | 0.170589047                                      |
| 211.2246642                                      | 151.1257631                                     | 0.147818028                                      |
| 93.24030274                                      | 124.9299905                                     | 0.103797024                                      |
| 236.2686981                                      | 126.1634349                                     | 0.192907084                                      |
| 285.2427232                                      | 139.5426739                                     | 0.231209181                                      |
| 480.8141858                                      | 191.7659008                                     | 0.234390948                                      |
| 197.1527393                                      | 179.9828445                                     | 0.121930972                                      |
| 272.6605341                                      | 120.5928783                                     | 0.24470782                                       |
| 300.0720382                                      | 288.1287129                                     | 0.146922132                                      |
| 279.3498385                                      | 143.6307858                                     | 0.192071358                                      |
| 218.9354005                                      | 97.53229974                                     | 0.244329845                                      |
| 499.1932344                                      | 284.1355561                                     | 0.211473886                                      |
| 207.5121495                                      | 124.8978193                                     | 0.188957278                                      |
| 304.6364347                                      | 192.9241595                                     | 0.163370454                                      |
| 163.0880282                                      | 86.6056338                                      | 0.244579334                                      |
| 381.5425715                                      | 221.0889349                                     | 0.17663341                                       |
| 967.5571223                                      | 492.9548201                                     | 0.202171631                                      |
| 293.4507308                                      | 153.1197548                                     | 0.205244325                                      |
| 614.1671924                                      | 287.0397962                                     | 0.213805274                                      |
| 140.4446602                                      | 72.14174757                                     | 0.203170522                                      |
| 415.9815668                                      | 162.3479263                                     | 0.227879982                                      |
| 216.8402367                                      | 86.92159763                                     | 0.258707529                                      |
| 344.1279964                                      | 152.9737675                                     | 0.234683074                                      |
| 588.7991058                                      | 224.2107303                                     | 0.26612284                                       |
| 437.2471315                                      | 273.7778758                                     | 0.193126013                                      |
| 432.3111744                                      | 234.5435264                                     | 0.211649028                                      |
| 571.8536939                                      | 284.1144375                                     | 0.196457414                                      |
| 731.8788                                         | 347.2396                                        | 0.211499941                                      |
| 342.7226393                                      | 186.8182537                                     | 0.183483026                                      |
| 66.24324324                                      | 37.61122661                                     | 0.246829811                                      |
| 130.9369369                                      | 64.51351351                                     | 0.20595143                                       |
| 412.4964252                                      | 269.8492384                                     | 0.16764139                                       |
| 566.502942                                       | 213.5099468                                     | 0.240057204                                      |
| 432.9551755                                      | 289.8852846                                     | 0.170505752                                      |
| 157.7398922                                      | 147.4460916                                     | 0.120768401                                      |
| 190.0378973                                      | 139.0623472                                     | 0.16477264                                       |
| 187.6474164                                      | 107.1778116                                     | 0.228875216                                      |
| 242.0590062                                      | 159.6169772                                     | 0.181021507                                      |
| 348.3861909                                      | 254.6247109                                     | 0.152457969                                      |
| 213.6857749                                      | 162.8577495                                     | 0.176775829                                      |
| 471.2593017                                      | 226.2432742                                     | 0.213245627                                      |
| 538.2095105                                      | 240.84                                          | 0.19098317                                       |
| 509.7021161                                      | 251.1405317                                     | 0.217895541                                      |
| 183.969657                                       | 136.5277045                                     | 0.179297837                                      |
| 62.76595745                                      | 52.31914894                                     | 0.175763844                                      |
| 118.9247706                                      | 90.79266055                                     | 0.205374765                                      |
| 433.2464859                                      | 340.2700803                                     | 0.147132034                                      |
| 189.7801636                                      | 232.301636                                      | 0.116605416                                      |
| 454.7318936                                      | 285.264946                                      | 0.160235025                                      |
| 182.4859095                                      | 85.38257899                                     | 0.230996626                                      |
| 607.014732                                       | 261.7757176                                     | 0.207448783                                      |
| 298.5603814                                      | 115.4512712                                     | 0.237678054                                      |
| 477.9929857                                      | 217.7282708                                     | 0.230801509                                      |
| 219.5559211                                      | 255.7582237                                     | 0.150463954                                      |
| 200.0830904                                      | 105.6778426                                     | 0.211355756                                      |
| 171.6192171                                      | 157.8142349                                     | 0.120786712                                      |
| 340.6817409                                      | 197.8466508                                     | 0.182483915                                      |
| 673.2861309                                      | 423.0390013                                     | 0.18909988                                       |
| 304.9321885                                      | 165.22369                                       | 0.204471457                                      |
| 331.987152                                       | 125.8190578                                     | 0.236307463                                      |
| 96.65084746                                      | 43.26101695                                     | 0.265409767                                      |
| 229.4977317                                      | 103.8632534                                     | 0.237968799                                      |
| 126.6086957                                      | 78.3100189                                      | 0.190089392                                      |
| 492.1228267                                      | 232.8042625                                     | 0.196780963                                      |
| 164.4508894                                      | 104.5808198                                     | 0.179664208                                      |
| 346.597128                                       | 168.9768648                                     | 0.219753342                                      |
| 638.7888655                                      | 199.7190126                                     | 0.2758917                                        |
| 250.2799612                                      | 189.3027656                                     | 0.149652216                                      |
| 620.7862791                                      | 330.4468904                                     | 0.200764713                                      |
| 924.4950084                                      | 491.7350637                                     | 0.184033894                                      |
| 649.8836227                                      | 257.1145002                                     | 0.209973608                                      |
| 316.4886315                                      | 157.7353067                                     | 0.221098154                                      |
| 273.9927813                                      | 215.3261146                                     | 0.149577054                                      |
| 195.1942605                                      | 105.1059603                                     | 0.204078154                                      |
| 476.2557998                                      | 250.3956044                                     | 0.201985973                                      |
| 560.4358859                                      | 357.1504604                                     | 0.191894968                                      |
| 174.9309838                                      | 105.4816446                                     | 0.224376218                                      |
| 414.6785849                                      | 173.2709823                                     | 0.253625917                                      |
| 379.9943411                                      | 167.8771221                                     | 0.225895597                                      |
| 47.44359465                                      | 61.91395793                                     | 0.150273379                                      |
| 589.0409114                                      | 251.3961678                                     | 0.216070247                                      |
| 427.3851468                                      | 254.4686241                                     | 0.175523846                                      |
| 212.0168067                                      | 89.47759104                                     | 0.239924272                                      |
| 387.1873151                                      | 247.2247782                                     | 0.166868577                                      |
| 55.16058394                                      | 42.93187348                                     | 0.21160957                                       |
| 75.87197232                                      | 48.66435986                                     | 0.190685691                                      |
| 459.7075677                                      | 231.4490813                                     | 0.190770475                                      |
| 177.2244344                                      | 74.33755656                                     | 0.249910766                                      |
| 232.346991                                       | 132.0973111                                     | 0.192429075                                      |
| 545.3482656                                      | 359.398346                                      | 0.178693816                                      |
| 592.401615                                       | 376.8499788                                     | 0.173617269                                      |
| 190.3914027                                      | 40.51357466                                     | 0.37057773                                       |
| 196.3556438                                      | 183.1849121                                     | 0.13784625                                       |
| 55.67757009                                      | 34.19158879                                     | 0.175891395                                      |
| 91.06756757                                      | 95.83558559                                     | 0.152351894                                      |
| 247.9202773                                      | 57.48700173                                     | 0.352721742                                      |

| log.sigma.4.0.mm.3D_gldm_DependenceNonUniformityNormalized | log.sigma.4.0.mm.3D_gldm_DependenceVariance | log.sigma.4.0.mm.3D_gldm_LargeDependenceEmphasis |
|------------------------------------------------------------|---------------------------------------------|--------------------------------------------------|
| 0.145303823                                                | 5.221505671                                 | 19.04655029                                      |
| 0.1365925                                                  | 6.6286                                      | 23.603                                           |
| 0.163544343                                                | 4.008666127                                 | 15.97853309                                      |
| 0.136349427                                                | 5.464999803                                 | 22.06074195                                      |
| 0.107684757                                                | 8.863996376                                 | 32.43097998                                      |
| 0.128952786                                                | 6.859021321                                 | 27.45665446                                      |
| 0.088212207                                                | 15.41084933                                 | 53.89309366                                      |
| 0.130896786                                                | 5.432412581                                 | 22.63767313                                      |
| 0.14072162                                                 | 7.376681694                                 | 22.86383818                                      |
| 0.160111284                                                | 4.14893487                                  | 16.63902764                                      |
| 0.109105002                                                | 8.485988664                                 | 35.20807969                                      |
| 0.161816341                                                | 4.11720311                                  | 16.14183976                                      |
| 0.10244863                                                 | 9.895370124                                 | 36.7234551                                       |
| 0.150349752                                                | 4.536791415                                 | 19.32077503                                      |
| 0.141431137                                                | 4.785559762                                 | 18.68863049                                      |
| 0.121487767                                                | 16.52555251                                 | 38.81893405                                      |
| 0.129291059                                                | 5.884610592                                 | 23.52461059                                      |
| 0.119091648                                                | 7.861108139                                 | 29.2634871                                       |
| 0.143563405                                                | 4.855720591                                 | 18.70774648                                      |
| 0.131521052                                                | 6.625135742                                 | 24.97518097                                      |
| 0.139216852                                                | 5.935794214                                 | 21.88978417                                      |
| 0.138354894                                                | 5.348009766                                 | 21.11126827                                      |
| 0.149033534                                                | 4.635994013                                 | 18.7408396                                       |
| 0.136354039                                                | 5.91528325                                  | 22.1961165                                       |
| 0.159747145                                                | 4.679882185                                 | 17.52841782                                      |
| 0.16038479                                                 | 5.112406341                                 | 17.39349112                                      |
| 0.155643599                                                | 4.501222762                                 | 17.40072365                                      |
| 0.175498988                                                | 3.238757554                                 | 13.58777943                                      |
| 0.128639933                                                | 6.037783987                                 | 23.73021477                                      |
| 0.136850641                                                | 5.08235914                                  | 20.55745489                                      |
| 0.138062215                                                | 5.167467739                                 | 21.2409464                                       |
| 0.14637576                                                 | 5.27349056                                  | 19.9332                                          |
| 0.135409972                                                | 5.330960023                                 | 22.40734887                                      |
| 0.13771984                                                 | 10.1772641                                  | 27.65696466                                      |
| 0.147451506                                                | 5.839663988                                 | 20.98648649                                      |
| 0.128223943                                                | 6.181992444                                 | 25.15604601                                      |
| 0.158728759                                                | 3.886868658                                 | 16.15158308                                      |
| 0.127677728                                                | 5.996599495                                 | 24.89383663                                      |
| 0.106293728                                                | 9.317474444                                 | 37.2277628                                       |
| 0.116160084                                                | 7.376758269                                 | 28.95721271                                      |
| 0.142589222                                                | 4.853985551                                 | 19.16261398                                      |
| 0.125289341                                                | 7.557471634                                 | 26.85921325                                      |
| 0.115092894                                                | 8.57981132                                  | 31.84043608                                      |
| 0.113421324                                                | 8.071720286                                 | 29.75053079                                      |
| 0.134876732                                                | 10.07438805                                 | 27.96336577                                      |
| 0.150548115                                                | 4.041417693                                 | 18.63916084                                      |
| 0.138280552                                                | 7.322824348                                 | 23.35756918                                      |
| 0.121352016                                                | 6.946582104                                 | 26.54881266                                      |
| 0.111287159                                                | 8.925821136                                 | 31.60638298                                      |
| 0.109105294                                                | 10.23167747                                 | 32.57247706                                      |
| 0.108746608                                                | 7.953754526                                 | 32.44929719                                      |
| 0.097024624                                                | 10.51257418                                 | 42.40388548                                      |
| 0.119760836                                                | 6.681426898                                 | 27.55359494                                      |
| 0.155837668                                                | 3.818209928                                 | 16.63962425                                      |
| 0.15418205                                                 | 4.262734719                                 | 18.05461011                                      |
| 0.158135795                                                | 4.582410541                                 | 17.24364407                                      |
| 0.145774012                                                | 5.901667073                                 | 20.28331808                                      |
| 0.090277928                                                | 15.49411087                                 | 48.42434211                                      |
| 0.145833156                                                | 4.370364389                                 | 18.6909621                                       |
| 0.122148909                                                | 5.748032573                                 | 29.69181495                                      |
| 0.115838742                                                | 8.42508539                                  | 29.48010881                                      |
| 0.122705692                                                | 6.724915983                                 | 25.62292692                                      |
| 0.13427221                                                 | 6.139568441                                 | 22.67591369                                      |
| 0.177723315                                                | 2.907071196                                 | 13.74625268                                      |
| 0.163814996                                                | 4.21897156                                  | 15.7559322                                       |
| 0.148734758                                                | 4.78144729                                  | 18.213221                                        |
| 0.119667954                                                | 7.93673193                                  | 27.8563327                                       |
| 0.138004158                                                | 4.786860638                                 | 20.75546831                                      |
| 0.127185529                                                | 5.411097533                                 | 23.78886311                                      |
| 0.138251746                                                | 6.341906642                                 | 21.95811727                                      |
| 0.167749177                                                | 4.12962731                                  | 15.1092437                                       |
| 0.121436177                                                | 6.096341544                                 | 27.25812712                                      |
| 0.13267499                                                 | 5.990822289                                 | 22.75721308                                      |
| 0.141989711                                                | 4.710950109                                 | 20.70480725                                      |
| 0.152483253                                                | 4.608064766                                 | 18.56780854                                      |
| 0.135773759                                                | 6.065960058                                 | 21.76876877                                      |
| 0.11634513                                                 | 7.008029354                                 | 29.27600849                                      |
| 0.143630802                                                | 4.759724097                                 | 19.74613687                                      |
| 0.145377228                                                | 4.517127561                                 | 19.33821734                                      |
| 0.125855802                                                | 6.918570479                                 | 25.32966539                                      |
| 0.128436846                                                | 5.833327943                                 | 22.21145374                                      |
| 0.156070224                                                | 4.450102548                                 | 16.77794505                                      |
| 0.153595126                                                | 4.637646561                                 | 18.10185934                                      |
| 0.09071433                                                 | 13.06900548                                 | 45.25239006                                      |
| 0.152522245                                                | 4.276579003                                 | 17.872087                                        |
| 0.123023934                                                | 6.631229474                                 | 26.21070812                                      |
| 0.148471153                                                | 5.715960894                                 | 19.5952381                                       |
| 0.127238684                                                | 5.727082159                                 | 24.80414065                                      |
| 0.134210667                                                | 5.169836788                                 | 20.99513382                                      |
| 0.131266388                                                | 6.590115061                                 | 24.29411765                                      |
| 0.14316648                                                 | 5.068129535                                 | 20.91155403                                      |
| 0.160384104                                                | 3.898421408                                 | 15.81809955                                      |
| 0.148749674                                                | 4.658707688                                 | 19.66069142                                      |
| 0.125281017                                                | 6.512475085                                 | 25.38594073                                      |
| 0.125882196                                                | 6.107389198                                 | 25.07224819                                      |
| 0.21537489                                                 | 2.654040663                                 | 9.805429864                                      |
| 0.111375861                                                | 7.529206423                                 | 32.50652297                                      |
| 0.130087781                                                | 6.421761726                                 | 24.94392523                                      |
| 0.102553567                                                | 11.66597679                                 | 39.34684685                                      |
| 0.214835596                                                | 2.377888379                                 | 9.547660312                                      |

| log.sigma.4.0.mm.3D_gldm_LargeDependenceLowGrayLevelEmphasis | log.sigma.4.0.mm.3D_gldm_SmallDependenceHighGrayLevelEmphasis | log.sigma.4.0.mm.3D_gldm_LargeDependenceHighGrayLevelEmphasis |
|--------------------------------------------------------------|---------------------------------------------------------------|---------------------------------------------------------------|
| 0.271648252                                                  | 58.52922492                                                   | 3185.85453                                                    |
| 0.138107402                                                  | 52.78888432                                                   | 5216.8635                                                     |
| 0.143745754                                                  | 46.65365219                                                   | 3323.9839                                                     |
| 0.194142742                                                  | 35.20995454                                                   | 3353.947004                                                   |
| 0.614914119                                                  | 22.78286553                                                   | 2413.804004                                                   |
| 0.301260339                                                  | 21.3943044                                                    | 3278.826007                                                   |
| 1.384367586                                                  | 10.91978452                                                   | 2783.081362                                                   |
| 0.098292792                                                  | 62.10399462                                                   | 6536.67867                                                    |
| 0.19651528                                                   | 47.23236661                                                   | 3681.050814                                                   |
| 0.03314283                                                   | 133.7346943                                                   | 9530.374292                                                   |
| 0.311905096                                                  | 18.18580828                                                   | 4864.401771                                                   |
| 0.089132795                                                  | 58.38376517                                                   | 3889.190504                                                   |
| 0.244243536                                                  | 31.84355229                                                   | 6278.561967                                                   |
| 0.226504842                                                  | 25.99616207                                                   | 2710.017761                                                   |
| 0.117332326                                                  | 56.78933108                                                   | 4007.881137                                                   |
| 0.145361937                                                  | 81.25966918                                                   | 11943.8311                                                    |
| 0.074183598                                                  | 65.34240117                                                   | 8941.391277                                                   |
| 0.138639501                                                  | 53.59564029                                                   | 7282.989445                                                   |
| 0.097285479                                                  | 64.77367579                                                   | 4421.353873                                                   |
| 0.176446406                                                  | 43.20855493                                                   | 5319.917615                                                   |
| 0.075626802                                                  | 69.11738634                                                   | 7642.603741                                                   |
| 0.067070306                                                  | 76.32385424                                                   | 7725.845356                                                   |
| 0.088792861                                                  | 62.26799169                                                   | 5249.259646                                                   |
| 0.218012681                                                  | 44.45956724                                                   | 3957.561165                                                   |
| 0.196586535                                                  | 44.23866678                                                   | 3560.306836                                                   |
| 0.070428517                                                  | 91.6271079                                                    | 5306.244083                                                   |
| 0.113814032                                                  | 46.76785481                                                   | 3511.797377                                                   |
| 0.066205753                                                  | 66.47185273                                                   | 4047.791952                                                   |
| 0.090692392                                                  | 62.59143791                                                   | 7420.077081                                                   |
| 0.068211716                                                  | 74.55510822                                                   | 7289.207028                                                   |
| 0.058236836                                                  | 75.28187986                                                   | 9214.914051                                                   |
| 0.090266988                                                  | 67.54388263                                                   | 5765.7346                                                     |
| 0.060729466                                                  | 93.81441962                                                   | 10666.37179                                                   |
| 0.354494404                                                  | 43.62370814                                                   | 3015.902287                                                   |
| 0.115749543                                                  | 45.41369998                                                   | 4882.128378                                                   |
| 0.105883909                                                  | 47.25359399                                                   | 6841.857631                                                   |
| 0.047569897                                                  | 104.8715259                                                   | 7026.38246                                                    |
| 0.075850657                                                  | 59.0205703                                                    | 9035.795636                                                   |
| 0.244344374                                                  | 25.90417438                                                   | 6506.649596                                                   |
| 0.411271756                                                  | 26.72355028                                                   | 2822.949878                                                   |
| 0.187063243                                                  | 36.9025169                                                    | 2891.762918                                                   |
| 0.246218627                                                  | 33.49496885                                                   | 3642.977226                                                   |
| 0.168749763                                                  | 39.33570464                                                   | 7074.841427                                                   |
| 0.284902852                                                  | 33.33795349                                                   | 3837.235669                                                   |
| 0.066084153                                                  | 100.07926                                                     | 13584.22038                                                   |
| 0.170620853                                                  | 36.88000489                                                   | 3920.582378                                                   |
| 0.096315287                                                  | 75.56571417                                                   | 7434.836408                                                   |
| 0.080237701                                                  | 54.8442514                                                    | 10094.75264                                                   |
| 0.843974336                                                  | 19.23023058                                                   | 1870.278369                                                   |
| 0.292667419                                                  | 42.02331579                                                   | 4368.514679                                                   |
| 0.131861637                                                  | 48.24749429                                                   | 9102.836847                                                   |
| 0.207193147                                                  | 32.95023017                                                   | 10944.3001                                                    |
| 0.213811274                                                  | 36.11388436                                                   | 4559.557282                                                   |
| 0.047090511                                                  | 90.36164107                                                   | 6820.552519                                                   |
| 0.079082007                                                  | 63.00899441                                                   | 5178.527813                                                   |
| 0.067751734                                                  | 83.13999273                                                   | 5612.398835                                                   |
| 0.039218625                                                  | 140.5099246                                                   | 11702.07929                                                   |
| 0.362269937                                                  | 38.46346815                                                   | 7253.454359                                                   |
| 0.063090184                                                  | 69.76157245                                                   | 6606.784257                                                   |
| 0.282937559                                                  | 13.90620926                                                   | 3939.415658                                                   |
| 0.19161975                                                   | 47.06114105                                                   | 5995.592996                                                   |
| 0.065580638                                                  | 83.59954102                                                   | 11235.62238                                                   |
| 0.086802863                                                  | 64.0871542                                                    | 7063.55218                                                    |
| 0.079263517                                                  | 48.35976254                                                   | 3518.199679                                                   |
| 0.154513419                                                  | 40.02748662                                                   | 2366.644068                                                   |
| 0.17408727                                                   | 56.83088291                                                   | 2822.624109                                                   |
| 0.269920034                                                  | 44.45791585                                                   | 3825.191871                                                   |
| 0.116065233                                                  | 55.25206852                                                   | 4971.964666                                                   |
| 0.106158302                                                  | 42.82338989                                                   | 6252.113689                                                   |
| 0.059964393                                                  | 102.4043626                                                   | 9146.866374                                                   |
| 0.056852181                                                  | 115.4683691                                                   | 6398.978992                                                   |
| 0.15456995                                                   | 37.6148059                                                    | 5497.350801                                                   |
| 0.123232899                                                  | 64.79854322                                                   | 6290.639453                                                   |
| 0.061879272                                                  | 65.12633256                                                   | 8001.452772                                                   |
| 0.069911834                                                  | 81.82686093                                                   | 6352.809479                                                   |
| 0.088411468                                                  | 74.34636154                                                   | 6945.800944                                                   |
| 0.124588209                                                  | 37.08284447                                                   | 7723.530361                                                   |
| 0.129488283                                                  | 48.29879753                                                   | 4273.533481                                                   |
| 0.062870589                                                  | 69.17010524                                                   | 6952.910867                                                   |
| 0.072212728                                                  | 72.78613746                                                   | 9988.640467                                                   |
| 0.035233464                                                  | 154.8378252                                                   | 15410.13142                                                   |
| 0.04321272                                                   | 108.5951581                                                   | 7880.509974                                                   |
| 0.065728077                                                  | 87.66479776                                                   | 6145.092158                                                   |
| 1.005300766                                                  | 13.697053                                                     | 2614.544933                                                   |
| 0.062689048                                                  | 74.52444608                                                   | 6616.830658                                                   |
| 0.452584458                                                  | 22.16890861                                                   | 2648.253022                                                   |
| 0.082802714                                                  | 81.39422073                                                   | 5886.904762                                                   |
| 0.149878134                                                  | 38.18213709                                                   | 4944.028919                                                   |
| 0.658876253                                                  | 13.2075376                                                    | 1308.172749                                                   |
| 0.201903939                                                  | 30.70204314                                                   | 4220.681661                                                   |
| 0.090041084                                                  | 63.52176592                                                   | 5728.580193                                                   |
| 0.083126581                                                  | 64.41623101                                                   | 3892.921267                                                   |
| 0.097686924                                                  | 41.40481495                                                   | 5028.202945                                                   |
| 0.073786903                                                  | 68.97740196                                                   | 9746.173444                                                   |
| 0.192456333                                                  | 33.24118857                                                   | 4392.042924                                                   |
| 0.054613752                                                  | 199.7421537                                                   | 6413.079186                                                   |
| 0.153606032                                                  | 37.58256308                                                   | 7781.857062                                                   |
| 0.619031382                                                  | 18.77156065                                                   | 1810.626168                                                   |
| 0.861856779                                                  | 13.62385204                                                   | 2375.959459                                                   |
| 0.057673978                                                  | 127.2715451                                                   | 3972.070191                                                   |

| log.sigma.4.0.mm.3D_gldm_SmallDependenceLowGrayLevelEmphasis | log.sigma.4.0.mm.3D_gldm_LowGrayLevelEmphasis | log.sigma.4.0.mm.3D_gldzm_DistanceZoneVariabilityNormalized |
|--------------------------------------------------------------|-----------------------------------------------|-------------------------------------------------------------|
| 0.003262472                                                  | 0.01521203                                    | 1                                                           |
| 0.001602339                                                  | 0.007009207                                   | 1                                                           |
| 0.003928592                                                  | 0.013102412                                   | 1                                                           |
| 0.002982997                                                  | 0.010236749                                   | 1                                                           |
| 0.004382959                                                  | 0.024730336                                   | 1                                                           |
| 0.002990995                                                  | 0.013244304                                   | 1                                                           |
| 0.002984758                                                  | 0.023458835                                   | 1                                                           |
| 0.002092762                                                  | 0.005842487                                   | 1                                                           |
| 0.004067897                                                  | 0.011141961                                   | 1                                                           |
| 0.000879345                                                  | 0.002521496                                   | 1                                                           |
| 0.001589969                                                  | 0.009892825                                   | 1                                                           |
| 0.002621364                                                  | 0.007354845                                   | 1                                                           |
| 0.00145504                                                   | 0.007612407                                   | 1                                                           |
| 0.004038691                                                  | 0.016888669                                   | 1                                                           |
| 0.003040892                                                  | 0.007902125                                   | 1                                                           |
| 0.001211589                                                  | 0.004277472                                   | 0.998019804                                                 |
| 0.001710697                                                  | 0.005325063                                   | 1                                                           |
| 0.001174637                                                  | 0.004735231                                   | 1                                                           |
| 0.002495096                                                  | 0.00628762                                    | 1                                                           |
| 0.001420801                                                  | 0.008401635                                   | 1                                                           |
| 0.001083062                                                  | 0.004090972                                   | 0.995221055                                                 |
| 0.001280641                                                  | 0.003984905                                   | 0.996070742                                                 |
| 0.001335691                                                  | 0.005733196                                   | 0.998086126                                                 |
| 0.003268767                                                  | 0.013543192                                   | 1                                                           |
| 0.003508093                                                  | 0.012746491                                   | 1                                                           |
| 0.003798064                                                  | 0.006626643                                   | 1                                                           |
| 0.002641022                                                  | 0.008115337                                   | 1                                                           |
| 0.00230639                                                   | 0.006284627                                   | 1                                                           |
| 0.001714776                                                  | 0.005053052                                   | 0.997237574                                                 |
| 0.001353324                                                  | 0.004509033                                   | 1                                                           |
| 0.001162673                                                  | 0.003625371                                   | 0.997892521                                                 |
| 0.001505803                                                  | 0.00506944                                    | 1                                                           |
| 0.001043834                                                  | 0.003590472                                   | 1                                                           |
| 0.006338544                                                  | 0.017376945                                   | 1                                                           |
| 0.002908928                                                  | 0.008293396                                   | 1                                                           |
| 0.001080291                                                  | 0.005000372                                   | 1                                                           |
| 0.001319538                                                  | 0.003805064                                   | 0.997993984                                                 |
| 0.001008096                                                  | 0.00374967                                    | 1                                                           |
| 0.001569818                                                  | 0.008082372                                   | 1                                                           |
| 0.00341472                                                   | 0.014852761                                   | 1                                                           |
| 0.003342147                                                  | 0.012366561                                   | 1                                                           |
| 0.002230939                                                  | 0.009121197                                   | 1                                                           |
| 0.001597607                                                  | 0.006252366                                   | 1                                                           |
| 0.002930297                                                  | 0.010471261                                   | 1                                                           |
| 0.001068638                                                  | 0.003308225                                   | 1                                                           |
| 0.002083176                                                  | 0.011001848                                   | 1                                                           |
| 0.001254141                                                  | 0.005436932                                   | 0.991498561                                                 |
| 0.001872886                                                  | 0.004821917                                   | 1                                                           |
| 0.003809499                                                  | 0.027800792                                   | 1                                                           |
| 0.003140148                                                  | 0.009908483                                   | 1                                                           |
| 0.000957515                                                  | 0.004784814                                   | 1                                                           |
| 0.000865907                                                  | 0.006666769                                   | 1                                                           |
| 0.001643556                                                  | 0.008003002                                   | 1                                                           |
| 0.001644861                                                  | 0.003781412                                   | 1                                                           |
| 0.001373152                                                  | 0.004954965                                   | 1                                                           |
| 0.001783273                                                  | 0.005013644                                   | 1                                                           |
| 0.000863028                                                  | 0.002364659                                   | 0.995423365                                                 |
| 0.001491127                                                  | 0.007623642                                   | 1                                                           |
| 0.001862886                                                  | 0.004724929                                   | 1                                                           |
| 0.0020392                                                    | 0.012473913                                   | 1                                                           |
| 0.001379297                                                  | 0.007097653                                   | 1                                                           |
| 0.000927617                                                  | 0.003161607                                   | 1                                                           |
| 0.00166998                                                   | 0.005072691                                   | 1                                                           |
| 0.002492238                                                  | 0.008115436                                   | 1                                                           |
| 0.005329917                                                  | 0.012213614                                   | 1                                                           |
| 0.002170642                                                  | 0.009441112                                   | 1                                                           |
| 0.002827316                                                  | 0.010843249                                   | 1                                                           |
| 0.001860214                                                  | 0.006371169                                   | 1                                                           |
| 0.001951331                                                  | 0.00568644                                    | 1                                                           |
| 0.001136392                                                  | 0.003316092                                   | 1                                                           |
| 0.001382741                                                  | 0.00426253                                    | 1                                                           |
| 0.002004892                                                  | 0.006652649                                   | 1                                                           |
| 0.001091461                                                  | 0.005972184                                   | 1                                                           |
| 0.000939321                                                  | 0.003567357                                   | 0.998498499                                                 |
| 0.001236946                                                  | 0.004750881                                   | 1                                                           |
| 0.001535325                                                  | 0.00577535                                    | 1                                                           |
| 0.001597662                                                  | 0.005481707                                   | 1                                                           |
| 0.002828713                                                  | 0.00919018                                    | 1                                                           |
| 0.001221384                                                  | 0.004134836                                   | 1                                                           |
| 0.001028568                                                  | 0.003595332                                   | 1                                                           |
| 0.001278821                                                  | 0.002635063                                   | 1                                                           |
| 0.001540971                                                  | 0.003723171                                   | 1                                                           |
| 0.001313857                                                  | 0.004647023                                   | 1                                                           |
| 0.005207811                                                  | 0.021073811                                   | 1                                                           |
| 0.001394995                                                  | 0.00443272                                    | 0.995955527                                                 |
| 0.00392675                                                   | 0.018724925                                   | 0.997080298                                                 |
| 0.002358998                                                  | 0.006030841                                   | 1                                                           |
| 0.001565708                                                  | 0.0065158                                     | 1                                                           |
| 0.009275333                                                  | 0.029621625                                   | 1                                                           |
| 0.003415095                                                  | 0.013525942                                   | 1                                                           |
| 0.001117713                                                  | 0.004341569                                   | 1                                                           |
| 0.003864044                                                  | 0.008175489                                   | 1                                                           |
| 0.002179116                                                  | 0.007677351                                   | 1                                                           |
| 0.000935061                                                  | 0.003513762                                   | 1                                                           |
| 0.001875899                                                  | 0.008663031                                   | 1                                                           |
| 0.00224884                                                   | 0.007128472                                   | 1                                                           |
| 0.00092229                                                   | 0.005895776                                   | 1                                                           |
| 0.005540583                                                  | 0.023037047                                   | 1                                                           |
| 0.005075957                                                  | 0.025013178                                   | 1                                                           |
| 0.002608752                                                  | 0.008176962                                   | 1                                                           |

| log.sigma.4.0.mm.3D_gldzm_LowIntensityEmphasis | log.sigma.4.0.mm.3D_gldzm_LargeDistanceEmphasis | log.sigma.4.0.mm.3D_gldzm_HighIntensitySmallDistanceEmphasis |
|------------------------------------------------|-------------------------------------------------|--------------------------------------------------------------|
| 0.017181862                                    | 1                                               | 252.652819                                                   |
| 0.0092462                                      | 1                                               | 281.0393873                                                  |
| 0.018317341                                    | 1                                               | 193.9630769                                                  |
| 0.015312994                                    | 1                                               | 189.1881919                                                  |
| 0.030138764                                    | 1                                               | 141.2108108                                                  |
| 0.020990056                                    | 1                                               | 143.3709091                                                  |
| 0.028397589                                    | 1                                               | 108.0671642                                                  |
| 0.010966844                                    | 1                                               | 324.3376289                                                  |
| 0.017219507                                    | 1                                               | 209.4055046                                                  |
| 0.003619362                                    | 1                                               | 572.7372781                                                  |
| 0.015061364                                    | 1                                               | 148.2490272                                                  |
| 0.010521336                                    | 1                                               | 241.98778                                                    |
| 0.01091899                                     | 1                                               | 222.0705394                                                  |
| 0.024087403                                    | 1                                               | 136.955711                                                   |
| 0.011816286                                    | 1                                               | 239.7636364                                                  |
| 0.005853582                                    | 1.002973241                                     | 385.9199703                                                  |
| 0.009635311                                    | 1                                               | 347.1517615                                                  |
| 0.006953922                                    | 1                                               | 338.1295117                                                  |
| 0.009544275                                    | 1                                               | 273.921875                                                   |
| 0.01006457                                     | 1                                               | 248.4466667                                                  |
| 0.00545078                                     | 1.007185629                                     | 339.9967066                                                  |
| 0.006029584                                    | 1.005905512                                     | 376.5688976                                                  |
| 0.007017425                                    | 1.002873563                                     | 293.4233716                                                  |
| 0.018183955                                    | 1                                               | 220.2879377                                                  |
| 0.015410542                                    | 1                                               | 194.3748309                                                  |
| 0.012909492                                    | 1                                               | 363.8419811                                                  |
| 0.0110637                                      | 1                                               | 200.5960265                                                  |
| 0.008608754                                    | 1                                               | 251.6225536                                                  |
| 0.009020066                                    | 1.004149378                                     | 327.3872752                                                  |
| 0.006924833                                    | 1                                               | 352.5229358                                                  |
| 0.005847523                                    | 1.003164557                                     | 381.378692                                                   |
| 0.007103488                                    | 1                                               | 325.5102208                                                  |
| 0.005899976                                    | 1                                               | 518.3436293                                                  |
| 0.026832283                                    | 1                                               | 179.4125874                                                  |
| 0.013557234                                    | 1                                               | 222.7402597                                                  |
| 0.007393006                                    | 1                                               | 282.391231                                                   |
| 0.005509383                                    | 1.003012048                                     | 444.8125                                                     |
| 0.005936384                                    | 1                                               | 349.6324655                                                  |
| 0.015003163                                    | 1                                               | 218.6439024                                                  |
| 0.020251291                                    | 1                                               | 169.016129                                                   |
| 0.016483073                                    | 1                                               | 164.2332362                                                  |
| 0.01196816                                     | 1                                               | 190.7167488                                                  |
| 0.011570962                                    | 1                                               | 260.5424431                                                  |
| 0.016378644                                    | 1                                               | 200.3881402                                                  |
| 0.005087164                                    | 1                                               | 466.2370787                                                  |
| 0.013064348                                    | 1                                               | 192.4309677                                                  |
| 0.006566966                                    | 1.01280683                                      | 351.3241729                                                  |
| 0.009949593                                    | 1                                               | 308.6435331                                                  |
| 0.026977532                                    | 1                                               | 112.5932203                                                  |
| 0.014306575                                    | 1                                               | 213.7878788                                                  |
| 0.007625452                                    | 1                                               | 334.9170579                                                  |
| 0.011214929                                    | 1                                               | 283.3647541                                                  |
| 0.010683806                                    | 1                                               | 236.1872075                                                  |
| 0.006492579                                    | 1                                               | 400.3738318                                                  |
| 0.006728079                                    | 1                                               | 310.24946                                                    |
| 0.007155136                                    | 1                                               | 351.7753623                                                  |
| 0.003581279                                    | 1.006880734                                     | 616.4762041                                                  |
| 0.009956397                                    | 1                                               | 266.7535885                                                  |
| 0.008184228                                    | 1                                               | 336.2253521                                                  |
| 0.021071189                                    | 1                                               | 115.2786885                                                  |
| 0.008821921                                    | 1                                               | 264.6839465                                                  |
| 0.005053686                                    | 1                                               | 441.8353448                                                  |
| 0.00794259                                     | 1                                               | 323.6466302                                                  |
| 0.011457762                                    | 1                                               | 205.458891                                                   |
| 0.018908428                                    | 1                                               | 152.4408602                                                  |
| 0.009879531                                    | 1                                               | 247.6052632                                                  |
| 0.013839739                                    | 1                                               | 248.1880342                                                  |
| 0.009533                                       | 1                                               | 288.7390728                                                  |
| 0.010655417                                    | 1                                               | 237.0196078                                                  |
| 0.004969815                                    | 1                                               | 470.6615147                                                  |
| 0.005296714                                    | 1                                               | 420.851461                                                   |
| 0.012727756                                    | 1                                               | 266.4188791                                                  |
| 0.006155759                                    | 1                                               | 331.1397059                                                  |
| 0.005194428                                    | 1.002253944                                     | 349.5905334                                                  |
| 0.006409858                                    | 1                                               | 398.4966249                                                  |
| 0.008337755                                    | 1                                               | 340.336163                                                   |
| 0.010747396                                    | 1                                               | 250.8941799                                                  |
| 0.015109453                                    | 1                                               | 241.1323077                                                  |
| 0.006201913                                    | 1                                               | 335.1044177                                                  |
| 0.00546285                                     | 1                                               | 375.4496439                                                  |
| 0.005393075                                    | 1                                               | 695.2096317                                                  |
| 0.005853625                                    | 1                                               | 429.8246914                                                  |
| 0.006529519                                    | 1                                               | 392.7476341                                                  |
| 0.031235992                                    | 1                                               | 95.72631579                                                  |
| 0.00639119                                     | 1.006079027                                     | 348.1469098                                                  |
| 0.024939038                                    | 1.004385965                                     | 130.5789474                                                  |
| 0.009596696                                    | 1                                               | 342.5311721                                                  |
| 0.009445618                                    | 1                                               | 234.0217786                                                  |
| 0.041289326                                    | 1                                               | 63.92929293                                                  |
| 0.022014358                                    | 1                                               | 163.3769231                                                  |
| 0.005589088                                    | 1                                               | 345.7945402                                                  |
| 0.014607293                                    | 1                                               | 259.2676923                                                  |
| 0.012529419                                    | 1                                               | 214.4553073                                                  |
| 0.005320366                                    | 1                                               | 388.593786                                                   |
| 0.011209981                                    | 1                                               | 196.3593407                                                  |
| 0.007294815                                    | 1                                               | 551.3120393                                                  |
| 0.009011563                                    | 1                                               | 276.1845018                                                  |
| 0.030529015                                    | 1                                               | 114.8021978                                                  |
| 0.033988431                                    | 1                                               | 93.41509434                                                  |
| 0.008628182                                    | 1                                               | 363.2738095                                                  |

| log.sigma.4.0.mm.3D_gldzm_LowIntensityLargeDistanceEmphasis | log.sigma.4.0.mm.3D_gldzm_HighIntensityEmphasis | log.sigma.4.0.mm.3D_gldzm_DistanceZoneVariability | log.sigma.4.0.mm.3D_gldzm_ZonePercentage |
|-------------------------------------------------------------|-------------------------------------------------|---------------------------------------------------|------------------------------------------|
| 0.017181862                                                 | 252.652819                                      | 337                                               | 0.280133001                              |
| 0.0092462                                                   | 281.0393873                                     | 457                                               | 0.2285                                   |
| 0.018317341                                                 | 193.9630769                                     | 325                                               | 0.290697674                              |
| 0.015312994                                                 | 189.1881919                                     | 542                                               | 0.220953934                              |
| 0.030138764                                                 | 141.2108108                                     | 185                                               | 0.194942044                              |
| 0.020990056                                                 | 143.3709091                                     | 275                                               | 0.167887668                              |
| 0.028397589                                                 | 108.0671642                                     | 134                                               | 0.126773888                              |
| 0.010966844                                                 | 324.3376289                                     | 388                                               | 0.214958449                              |
| 0.017219507                                                 | 209.4055046                                     | 545                                               | 0.268870252                              |
| 0.003619362                                                 | 572.7372781                                     | 845                                               | 0.281385281                              |
| 0.015061364                                                 | 148.2490272                                     | 257                                               | 0.142224682                              |
| 0.010521336                                                 | 241.98778                                       | 491                                               | 0.291394659                              |
| 0.01091899                                                  | 222.0705394                                     | 482                                               | 0.164561284                              |
| 0.024087403                                                 | 136.955711                                      | 429                                               | 0.230893434                              |
| 0.011816286                                                 | 239.7636364                                     | 440                                               | 0.284237726                              |
| 0.005871175                                                 | 386.0455897                                     | 1007.001982                                       | 0.24555853                               |
| 0.009635311                                                 | 347.1517615                                     | 369                                               | 0.229906542                              |
| 0.006953922                                                 | 338.1295117                                     | 471                                               | 0.184128225                              |
| 0.009544275                                                 | 273.921875                                      | 320                                               | 0.281690141                              |
| 0.010006457                                                 | 248.4466667                                     | 600                                               | 0.206825233                              |
| 0.005470889                                                 | 340.7431138                                     | 1662.019162                                       | 0.24028777                               |
| 0.006037116                                                 | 377.726378                                      | 506.003937                                        | 0.239509665                              |
| 0.00703738                                                  | 293.5268199                                     | 1042.001916                                       | 0.253336569                              |
| 0.018183955                                                 | 220.2879377                                     | 257                                               | 0.249514563                              |
| 0.015410542                                                 | 194.3748309                                     | 739                                               | 0.283794163                              |
| 0.012909492                                                 | 363.8419811                                     | 424                                               | 0.313609467                              |
| 0.0110637                                                   | 200.5960265                                     | 604                                               | 0.273179557                              |
| 0.008608754                                                 | 251.6225536                                     | 1073                                              | 0.319821162                              |
| 0.0090849                                                   | 327.4536653                                     | 721.0027663                                       | 0.21270962                               |
| 0.006924833                                                 | 352.5229358                                     | 763                                               | 0.24153213                               |
| 0.005851559                                                 | 381.9989451                                     | 946.0021097                                       | 0.22887494                               |
| 0.007103488                                                 | 325.5102208                                     | 1223                                              | 0.2446                                   |
| 0.005899976                                                 | 518.3436293                                     | 518                                               | 0.204662189                              |
| 0.026832283                                                 | 179.4125874                                     | 143                                               | 0.297297297                              |
| 0.013557234                                                 | 222.7402597                                     | 231                                               | 0.260135135                              |
| 0.007393006                                                 | 282.391231                                      | 593                                               | 0.18433323                               |
| 0.005516213                                                 | 445.1445783                                     | 994.002008                                        | 0.279069767                              |
| 0.005936384                                                 | 349.6324655                                     | 653                                               | 0.192568564                              |
| 0.015003163                                                 | 218.6439024                                     | 205                                               | 0.138140162                              |
| 0.020251291                                                 | 169.016129                                      | 310                                               | 0.189486553                              |
| 0.016483073                                                 | 164.2332362                                     | 343                                               | 0.260638298                              |
| 0.01196816                                                  | 190.7167488                                     | 406                                               | 0.210144928                              |
| 0.011570962                                                 | 260.5424431                                     | 483                                               | 0.159563925                              |
| 0.016378644                                                 | 200.3881402                                     | 371                                               | 0.196921444                              |
| 0.005087164                                                 | 466.2370787                                     | 890                                               | 0.254722381                              |
| 0.013064348                                                 | 192.4309677                                     | 775                                               | 0.216783217                              |
| 0.006626767                                                 | 352.3383138                                     | 929.0341515                                       | 0.2542051                                |
| 0.009949593                                                 | 308.6435331                                     | 317                                               | 0.209102902                              |
| 0.026977532                                                 | 112.5932203                                     | 118                                               | 0.209219858                              |
| 0.014306575                                                 | 213.7878788                                     | 264                                               | 0.242201835                              |
| 0.007625452                                                 | 334.9170579                                     | 639                                               | 0.160391566                              |
| 0.011214929                                                 | 283.3647541                                     | 244                                               | 0.124744376                              |
| 0.010683806                                                 | 236.1872075                                     | 641                                               | 0.168817487                              |
| 0.006492579                                                 | 400.3738318                                     | 321                                               | 0.27412468                               |
| 0.006728079                                                 | 310.24946                                       | 926                                               | 0.23520447                               |
| 0.007155136                                                 | 351.7753623                                     | 552                                               | 0.292372881                              |
| 0.003594891                                                 | 617.3474771                                     | 868.0091743                                       | 0.265934736                              |
| 0.009956397                                                 | 266.7535885                                     | 418                                               | 0.171875                                 |
| 0.008184228                                                 | 336.2253521                                     | 355                                               | 0.258746356                              |
| 0.021071189                                                 | 115.2786885                                     | 183                                               | 0.13024911                               |
| 0.008821921                                                 | 264.6839465                                     | 598                                               | 0.2033322                                |
| 0.005053686                                                 | 441.8353448                                     | 1160                                              | 0.211408784                              |
| 0.00794259                                                  | 323.6466302                                     | 549                                               | 0.241743725                              |
| 0.011457762                                                 | 205.458891                                      | 523                                               | 0.279978587                              |
| 0.018908428                                                 | 152.4408602                                     | 186                                               | 0.315254237                              |
| 0.009879531                                                 | 247.6052632                                     | 418                                               | 0.270900843                              |
| 0.013839739                                                 | 248.1880342                                     | 234                                               | 0.221172023                              |
| 0.009533                                                    | 288.7390728                                     | 755                                               | 0.211721817                              |
| 0.010655417                                                 | 237.0196078                                     | 255                                               | 0.197215777                              |
| 0.004969815                                                 | 470.6615147                                     | 647                                               | 0.258077383                              |
| 0.005296714                                                 | 420.851461                                      | 1232                                              | 0.323529412                              |
| 0.012727756                                                 | 266.4188791                                     | 339                                               | 0.164483261                              |
| 0.006155759                                                 | 331.1397059                                     | 1088                                              | 0.232528318                              |
| 0.005205928                                                 | 349.7009767                                     | 1329.001503                                       | 0.204423284                              |
| 0.006409858                                                 | 398.4966249                                     | 1037                                              | 0.243312999                              |
| 0.008337755                                                 | 340.336163                                      | 589                                               | 0.252681253                              |
| 0.010747396                                                 | 250.8941799                                     | 378                                               | 0.160509554                              |
| 0.015109453                                                 | 241.1323077                                     | 325                                               | 0.239146431                              |
| 0.006201913                                                 | 335.1044177                                     | 747                                               | 0.228021978                              |
| 0.00546285                                                  | 375.4496439                                     | 983                                               | 0.220750056                              |
| 0.005393075                                                 | 695.2096317                                     | 353                                               | 0.25917768                               |
| 0.005853625                                                 | 429.8246914                                     | 810                                               | 0.3048551                                |
| 0.006529519                                                 | 392.7476341                                     | 634                                               | 0.256265158                              |
| 0.031235992                                                 | 95.72631579                                     | 95                                                | 0.181644359                              |
| 0.006429184                                                 | 348.526849                                      | 983.0081054                                       | 0.255567064                              |
| 0.025007568                                                 | 130.6491228                                     | 682.002924                                        | 0.196891192                              |
| 0.009596696                                                 | 342.5311721                                     | 401                                               | 0.280812325                              |
| 0.009445618                                                 | 234.0217786                                     | 551                                               | 0.181071311                              |
| 0.041289326                                                 | 63.92929293                                     | 99                                                | 0.240875912                              |
| 0.022014358                                                 | 163.3769231                                     | 130                                               | 0.224913495                              |
| 0.005589088                                                 | 345.7945402                                     | 696                                               | 0.216754905                              |
| 0.014607293                                                 | 259.2676923                                     | 325                                               | 0.294117647                              |
| 0.012529419                                                 | 214.4553073                                     | 358                                               | 0.229193342                              |
| 0.005320366                                                 | 388.593786                                      | 869                                               | 0.199632437                              |
| 0.011209981                                                 | 196.3593407                                     | 910                                               | 0.193370166                              |
| 0.007294815                                                 | 551.3120393                                     | 407                                               | 0.46040724                               |
| 0.009011563                                                 | 276.1845018                                     | 271                                               | 0.153715258                              |
| 0.030529015                                                 | 114.8021978                                     | 91                                                | 0.212616822                              |
| 0.033988431                                                 | 93.41509434                                     | 159                                               | 0.179054054                              |
| 0.008628182                                                 | 363.2738095                                     | 504                                               | 0.436741768                              |

| log.sigma.4.0.mm.3D_gldzm_IntensityVariabilityNormalized | log.sigma.4.0.mm.3D_gldzm_LowIntensitySmallDistanceEmphasis | log.sigma.4.0.mm.3D_gldzm_IntensityVariability |
|----------------------------------------------------------|-------------------------------------------------------------|------------------------------------------------|
| 0.050726871                                              | 0.017181862                                                 | 17.09495549                                    |
| 0.060086474                                              | 0.0092462                                                   | 27.4595186                                     |
| 0.055015385                                              | 0.018317341                                                 | 17.88                                          |
| 0.058380196                                              | 0.015312994                                                 | 31.64206642                                    |
| 0.064368152                                              | 0.030138764                                                 | 11.90810811                                    |
| 0.063986777                                              | 0.020990056                                                 | 17.59636364                                    |
| 0.08398307                                               | 0.028397589                                                 | 11.25373134                                    |
| 0.054349559                                              | 0.010966844                                                 | 21.08762887                                    |
| 0.056409393                                              | 0.017219507                                                 | 30.74311927                                    |
| 0.05271104                                               | 0.003619362                                                 | 44.5408284                                     |
| 0.075625672                                              | 0.015061364                                                 | 19.43579767                                    |
| 0.058142284                                              | 0.010521336                                                 | 28.54786151                                    |
| 0.059184587                                              | 0.01091899                                                  | 28.52697095                                    |
| 0.065642982                                              | 0.024087403                                                 | 28.16083916                                    |
| 0.051508264                                              | 0.011816286                                                 | 22.66363636                                    |
| 0.050358469                                              | 0.005849183                                                 | 50.81169475                                    |
| 0.051284876                                              | 0.009635311                                                 | 18.92411924                                    |
| 0.057748568                                              | 0.006953922                                                 | 27.19957537                                    |
| 0.067636719                                              | 0.009544275                                                 | 21.64375                                       |
| 0.05665                                                  | 0.010006457                                                 | 33.99                                          |
| 0.055418265                                              | 0.005445753                                                 | 92.54850299                                    |
| 0.05488561                                               | 0.006027701                                                 | 27.88188976                                    |
| 0.055995948                                              | 0.007012436                                                 | 58.45977011                                    |
| 0.056336962                                              | 0.018183955                                                 | 14.47859922                                    |
| 0.057234569                                              | 0.015410542                                                 | 42.29634641                                    |
| 0.049005429                                              | 0.012909492                                                 | 20.77830189                                    |
| 0.06059493                                               | 0.0110637                                                   | 36.59933775                                    |
| 0.058071151                                              | 0.008608754                                                 | 62.31034483                                    |
| 0.052009741                                              | 0.009003858                                                 | 37.60304288                                    |
| 0.050265473                                              | 0.006924833                                                 | 38.3525557                                     |
| 0.051888052                                              | 0.005846513                                                 | 49.18987342                                    |
| 0.054276543                                              | 0.007103488                                                 | 66.38021259                                    |
| 0.050327216                                              | 0.005899976                                                 | 26.06949807                                    |
| 0.064208519                                              | 0.026832283                                                 | 9.181818182                                    |
| 0.057588876                                              | 0.013557234                                                 | 13.3030303                                     |
| 0.058492986                                              | 0.007393006                                                 | 34.68634064                                    |
| 0.045235157                                              | 0.005507676                                                 | 45.05421687                                    |
| 0.057261925                                              | 0.005936384                                                 | 37.39203675                                    |
| 0.059036288                                              | 0.015003163                                                 | 12.10243902                                    |
| 0.060957336                                              | 0.020251291                                                 | 18.89677419                                    |
| 0.064301439                                              | 0.016483073                                                 | 22.05539359                                    |
| 0.064197141                                              | 0.01196816                                                  | 26.06403941                                    |
| 0.065382423                                              | 0.011570962                                                 | 31.57971014                                    |
| 0.055426799                                              | 0.016378644                                                 | 20.56334232                                    |
| 0.046446156                                              | 0.005087164                                                 | 41.33707865                                    |
| 0.062126951                                              | 0.013064348                                                 | 48.1483871                                     |
| 0.051743285                                              | 0.006552016                                                 | 48.48345784                                    |
| 0.055160266                                              | 0.009949593                                                 | 17.48580442                                    |
| 0.082160299                                              | 0.026977532                                                 | 9.694915254                                    |
| 0.058482553                                              | 0.014306575                                                 | 15.43939394                                    |
| 0.054606547                                              | 0.007625452                                                 | 34.89358372                                    |
| 0.061979307                                              | 0.011214929                                                 | 15.12295082                                    |
| 0.056237694                                              | 0.010683806                                                 | 36.04836193                                    |
| 0.061344513                                              | 0.006492579                                                 | 19.69158879                                    |
| 0.055112913                                              | 0.006728079                                                 | 51.03455724                                    |
| 0.049602237                                              | 0.007155136                                                 | 27.38043478                                    |
| 0.048312432                                              | 0.003577876                                                 | 42.12844037                                    |
| 0.054783544                                              | 0.009956397                                                 | 22.89952153                                    |
| 0.05915493                                               | 0.008184228                                                 | 21                                             |
| 0.082026934                                              | 0.021071189                                                 | 15.01092896                                    |
| 0.056190647                                              | 0.008821921                                                 | 33.60200669                                    |
| 0.050870987                                              | 0.005053686                                                 | 59.01034483                                    |
| 0.054946732                                              | 0.00794259                                                  | 30.16575592                                    |
| 0.062183534                                              | 0.011457762                                                 | 32.52198853                                    |
| 0.063359926                                              | 0.018908428                                                 | 11.78494624                                    |
| 0.058274765                                              | 0.009879531                                                 | 24.35885167                                    |
| 0.052523924                                              | 0.013839739                                                 | 12.29059829                                    |
| 0.051785448                                              | 0.009533                                                    | 39.09801325                                    |
| 0.06638985                                               | 0.010655417                                                 | 16.92941176                                    |
| 0.050459976                                              | 0.004969815                                                 | 32.64760433                                    |
| 0.04858139                                               | 0.005296714                                                 | 59.85227273                                    |
| 0.058327025                                              | 0.012727756                                                 | 19.77286136                                    |
| 0.054505028                                              | 0.006155759                                                 | 59.30147059                                    |
| 0.058815361                                              | 0.005191553                                                 | 78.28324568                                    |
| 0.047052686                                              | 0.006409858                                                 | 48.79363549                                    |
| 0.050486998                                              | 0.008337755                                                 | 29.73684211                                    |
| 0.059054898                                              | 0.010747396                                                 | 22.32275132                                    |
| 0.05923787                                               | 0.015109453                                                 | 19.25230769                                    |
| 0.055101262                                              | 0.006201913                                                 | 41.16064257                                    |
| 0.051169992                                              | 0.00546285                                                  | 50.30010173                                    |
| 0.044659696                                              | 0.005393075                                                 | 15.76487252                                    |
| 0.046252096                                              | 0.005853625                                                 | 37.46419753                                    |
| 0.050672213                                              | 0.006529519                                                 | 32.12618297                                    |
| 0.093185596                                              | 0.031235992                                                 | 8.852631579                                    |
| 0.054313985                                              | 0.006381692                                                 | 53.60790274                                    |
| 0.063104887                                              | 0.024921905                                                 | 43.16374269                                    |
| 0.046995976                                              | 0.009596696                                                 | 18.84538653                                    |
| 0.063790962                                              | 0.009445618                                                 | 35.14882033                                    |
| 0.1184573                                                | 0.041289326                                                 | 11.72727273                                    |
| 0.067692308                                              | 0.022014358                                                 | 8.8                                            |
| 0.060126007                                              | 0.005589088                                                 | 41.84770115                                    |
| 0.054011834                                              | 0.014607293                                                 | 17.55384615                                    |
| 0.062139134                                              | 0.012529419                                                 | 22.24581006                                    |
| 0.052278918                                              | 0.005320366                                                 | 45.43037975                                    |
| 0.063004468                                              | 0.011209981                                                 | 57.33406593                                    |
| 0.036915405                                              | 0.007294815                                                 | 15.02457002                                    |
| 0.071635735                                              | 0.009011563                                                 | 19.41328413                                    |
| 0.073300326                                              | 0.030529015                                                 | 6.67032967                                     |
| 0.075985918                                              | 0.033988431                                                 | 12.08176101                                    |
| 0.045934114                                              | 0.008628182                                                 | 23.15079365                                    |

| log.sigma.4.0.mm.3D_gldzm_HighIntensityLargeDistanceEmphasis | log.sigma.4.0.mm.3D_gldzm_SmallDistanceEmphasis | log.sigma.4.0.mm.3D_glcm_SumVariance | log.sigma.4.0.mm.3D_glcm_Homogeneity1 |
|--------------------------------------------------------------|-------------------------------------------------|--------------------------------------|---------------------------------------|
| 252.652819                                                   | 1                                               | 603.0047101                          | 0.418406101                           |
| 281.0393873                                                  | 1                                               | 755.8099575                          | 0.442079319                           |
| 193.9630769                                                  | 1                                               | 564.9382535                          | 0.401117323                           |
| 189.1881919                                                  | 1                                               | 462.202527                           | 0.450053038                           |
| 141.2108108                                                  | 1                                               | 255.657153                           | 0.498189904                           |
| 143.3709091                                                  | 1                                               | 353.9156846                          | 0.474112858                           |
| 108.0671642                                                  | 1                                               | 192.006949                           | 0.564205486                           |
| 324.3376289                                                  | 1                                               | 955.610474                           | 0.45137534                            |
| 209.4055046                                                  | 1                                               | 561.7032455                          | 0.439153748                           |
| 572.7372781                                                  | 1                                               | 1819.607274                          | 0.408067558                           |
| 148.2490272                                                  | 1                                               | 417.0591863                          | 0.514271201                           |
| 241.98778                                                    | 1                                               | 706.3441114                          | 0.406456246                           |
| 222.0705394                                                  | 1                                               | 527.1415825                          | 0.511704195                           |
| 136.955711                                                   | 1                                               | 364.5880535                          | 0.436017073                           |
| 239.7636364                                                  | 1                                               | 688.5438743                          | 0.413380662                           |
| 386.5480674                                                  | 0.99925669                                      | 1138.487785                          | 0.453860243                           |
| 347.1517615                                                  | 1                                               | 1126.780506                          | 0.440182224                           |
| 338.1295117                                                  | 1                                               | 897.8310925                          | 0.473694831                           |
| 273.921875                                                   | 1                                               | 755.0607515                          | 0.425805433                           |
| 248.4466667                                                  | 1                                               | 678.5844186                          | 0.459157557                           |
| 343.7287425                                                  | 0.998203593                                     | 1070.079831                          | 0.424046127                           |
| 382.3562992                                                  | 0.998523622                                     | 1105.062049                          | 0.435237435                           |
| 293.940613                                                   | 0.999281609                                     | 847.5061765                          | 0.421479597                           |
| 220.2879377                                                  | 1                                               | 543.5369213                          | 0.443128824                           |
| 194.3748309                                                  | 1                                               | 543.2514851                          | 0.405500853                           |
| 363.8419811                                                  | 1                                               | 1062.36178                           | 0.396599323                           |
| 200.5960265                                                  | 1                                               | 616.9711128                          | 0.454355855                           |
| 251.6225536                                                  | 1                                               | 833.1521404                          | 0.38360041                            |
| 327.7192254                                                  | 0.998962656                                     | 999.9651485                          | 0.439455614                           |
| 352.5229358                                                  | 1                                               | 1125.684348                          | 0.43250049                            |
| 384.4799578                                                  | 0.999208861                                     | 1269.841361                          | 0.434301711                           |
| 325.5102208                                                  | 1                                               | 946.1686732                          | 0.432427372                           |
| 518.3436293                                                  | 1                                               | 1574.298218                          | 0.449847258                           |
| 179.4125874                                                  | 1                                               | 432.3220571                          | 0.453524947                           |
| 222.7402597                                                  | 1                                               | 654.645477                           | 0.430001577                           |
| 282.391231                                                   | 1                                               | 861.5313726                          | 0.458605793                           |
| 446.4728916                                                  | 0.999246988                                     | 1368.338531                          | 0.392736919                           |
| 349.6324655                                                  | 1                                               | 1114.690791                          | 0.455514177                           |
| 218.6439024                                                  | 1                                               | 560.665728                           | 0.521719657                           |
| 169.016129                                                   | 1                                               | 337.3358279                          | 0.480718865                           |
| 164.2332362                                                  | 1                                               | 433.7925854                          | 0.431610448                           |
| 190.7167488                                                  | 1                                               | 454.8629841                          | 0.465671426                           |
| 260.5424431                                                  | 1                                               | 742.1829591                          | 0.48802119                            |
| 200.3881402                                                  | 1                                               | 454.7157757                          | 0.479614049                           |
| 466.2370787                                                  | 1                                               | 1553.428206                          | 0.419948706                           |
| 192.4309677                                                  | 1                                               | 556.7421786                          | 0.433905795                           |
| 356.3948773                                                  | 0.996798292                                     | 1003.069886                          | 0.429459621                           |
| 308.6435331                                                  | 1                                               | 1129.605329                          | 0.451445901                           |
| 112.5932203                                                  | 1                                               | 211.5033579                          | 0.492988294                           |
| 213.7878788                                                  | 1                                               | 475.992313                           | 0.483745802                           |
| 334.9170579                                                  | 1                                               | 961.2074386                          | 0.49472273                            |
| 283.3647541                                                  | 1                                               | 828.185405                           | 0.526953173                           |
| 236.1872075                                                  | 1                                               | 539.6044186                          | 0.480746811                           |
| 400.3738318                                                  | 1                                               | 1315.783382                          | 0.414668306                           |
| 310.24946                                                    | 1                                               | 914.0835338                          | 0.416472923                           |
| 351.7753623                                                  | 1                                               | 1016.315286                          | 0.397116048                           |
| 620.8325688                                                  | 0.998279817                                     | 1978.764945                          | 0.414605826                           |
| 266.7535885                                                  | 1                                               | 565.8749737                          | 0.521636778                           |
| 336.2253521                                                  | 1                                               | 1076.623298                          | 0.421427008                           |
| 115.2786885                                                  | 1                                               | 342.7484623                          | 0.508771097                           |
| 264.6839465                                                  | 1                                               | 711.6651373                          | 0.47528572                            |
| 441.8353448                                                  | 1                                               | 1410.688098                          | 0.453305315                           |
| 323.6466302                                                  | 1                                               | 950.3815923                          | 0.435057389                           |
| 205.458891                                                   | 1                                               | 662.5728032                          | 0.391152948                           |
| 152.4408602                                                  | 1                                               | 461.9736599                          | 0.406655522                           |
| 247.6052632                                                  | 1                                               | 542.8915636                          | 0.418476189                           |
| 248.1880342                                                  | 1                                               | 482.763069                           | 0.465382547                           |
| 288.7390728                                                  | 1                                               | 766.3044515                          | 0.433504649                           |
| 237.0196078                                                  | 1                                               | 782.3766161                          | 0.461961477                           |
| 470.6615147                                                  | 1                                               | 1395.120535                          | 0.427624187                           |
| 420.851461                                                   | 1                                               | 1338.090966                          | 0.378375631                           |
| 266.4188791                                                  | 1                                               | 673.4776139                          | 0.479417769                           |
| 331.1397059                                                  | 1                                               | 918.322895                           | 0.441168921                           |
| 350.1427498                                                  | 0.999436514                                     | 1166.529895                          | 0.430798673                           |
| 398.4966249                                                  | 1                                               | 1090.952967                          | 0.416959057                           |
| 340.336163                                                   | 1                                               | 1021.726688                          | 0.420550171                           |
| 250.8941799                                                  | 1                                               | 812.0594911                          | 0.481838243                           |
| 241.1323077                                                  | 1                                               | 665.8905152                          | 0.431881485                           |
| 335.1044177                                                  | 1                                               | 1090.713865                          | 0.415392421                           |
| 375.4496439                                                  | 1                                               | 1231.423382                          | 0.443925555                           |
| 695.2096317                                                  | 1                                               | 2351.196943                          | 0.425333751                           |
| 429.8246914                                                  | 1                                               | 1377.682447                          | 0.39150181                            |
| 392.7476341                                                  | 1                                               | 1101.876227                          | 0.413111705                           |
| 95.72631579                                                  | 1                                               | 197.8696247                          | 0.543410386                           |
| 350.0466059                                                  | 0.998480243                                     | 1087.922716                          | 0.419631307                           |
| 130.9298246                                                  | 0.998903509                                     | 304.2476981                          | 0.472058418                           |
| 342.5311721                                                  | 1                                               | 959.7756648                          | 0.420101878                           |
| 234.0217786                                                  | 1                                               | 629.836855                           | 0.46424864                            |
| 63.92929293                                                  | 1                                               | 159.4872284                          | 0.455872731                           |
| 163.3769231                                                  | 1                                               | 488.7737249                          | 0.459092697                           |
| 345.7945402                                                  | 1                                               | 940.6505681                          | 0.43731916                            |
| 259.2676923                                                  | 1                                               | 760.8138057                          | 0.405836585                           |
| 214.4553073                                                  | 1                                               | 692.6151222                          | 0.43734899                            |
| 388.593786                                                   | 1                                               | 1199.142946                          | 0.453863886                           |
| 196.3593407                                                  | 1                                               | 508.510336                           | 0.467151073                           |
| 551.3120393                                                  | 1                                               | 1838.173648                          | 0.299095941                           |
| 276.1845018                                                  | 1                                               | 743.2070481                          | 0.505110247                           |
| 114.8021978                                                  | 1                                               | 248.5331426                          | 0.476352469                           |
| 93.41509434                                                  | 1                                               | 185.8107311                          | 0.525973271                           |
| 363.2738095                                                  | 1                                               | 1143.850064                          | 0.328187182                           |

| log.sigma.4.0.mm.3D_glc_m_Homogeneity2 | log.sigma.4.0.mm.3D_glc_m_ClusterShade | log.sigma.4.0.mm.3D_glc_m_MaximumProbability | log.sigma.4.0.mm.3D_glc_m_Idmn | log.sigma.4.0.mm.3D_glc_m_SumVariance2 |
|----------------------------------------|----------------------------------------|----------------------------------------------|--------------------------------|----------------------------------------|
| 0.342389527                            | 210.1611494                            | 0.031798148                                  | 0.984764036                    | 88.98999399                            |
| 0.368200662                            | 103.2685197                            | 0.036062166                                  | 0.98900029                     | 57.83949885                            |
| 0.319398053                            | -130.2362846                           | 0.027079928                                  | 0.984125414                    | 64.49218095                            |
| 0.376574908                            | 180.4862951                            | 0.031351069                                  | 0.988418018                    | 53.95894662                            |
| 0.438905739                            | 263.6749815                            | 0.068948859                                  | 0.983568886                    | 53.39724855                            |
| 0.407117982                            | 219.5062452                            | 0.050638298                                  | 0.987384769                    | 45.88038703                            |
| 0.516933644                            | 208.9044858                            | 0.101874519                                  | 0.987789769                    | 41.06222166                            |
| 0.380488317                            | 118.1722494                            | 0.031039897                                  | 0.991894918                    | 69.4060688                             |
| 0.36525108                             | 217.1198247                            | 0.037022058                                  | 0.98698951                     | 67.01708916                            |
| 0.326589167                            | -115.0276132                           | 0.024383128                                  | 0.991893063                    | 72.77504034                            |
| 0.456957819                            | 85.10879182                            | 0.048326454                                  | 0.988307284                    | 33.96141374                            |
| 0.324537674                            | -57.30447069                           | 0.020954864                                  | 0.986896542                    | 55.46876745                            |
| 0.453119591                            | 130.8533825                            | 0.057154806                                  | 0.991852942                    | 36.63905873                            |
| 0.359814979                            | -22.45005346                           | 0.026144022                                  | 0.984750369                    | 46.20349665                            |
| 0.337814049                            | 455.5932458                            | 0.0216659                                    | 0.984507178                    | 77.78987894                            |
| 0.382751351                            | -63.17363481                           | 0.069898382                                  | 0.990490441                    | 73.16590396                            |
| 0.36649075                             | -187.0766184                           | 0.035456858                                  | 0.990572176                    | 55.91562632                            |
| 0.408091051                            | 165.8921383                            | 0.036479332                                  | 0.992279665                    | 57.24634691                            |
| 0.347395333                            | -11.70843113                           | 0.024049795                                  | 0.986002543                    | 46.0118726                             |
| 0.389107212                            | -35.90828381                           | 0.03792596                                   | 0.988312635                    | 58.01364596                            |
| 0.347239153                            | -140.5642464                           | 0.022431135                                  | 0.991409486                    | 58.90022137                            |
| 0.359458061                            | 85.21285702                            | 0.027093693                                  | 0.99389102                     | 61.48813104                            |
| 0.342586835                            | 95.00324938                            | 0.027235918                                  | 0.989577609                    | 64.75055054                            |
| 0.370170185                            | 42.33759636                            | 0.040760635                                  | 0.986051296                    | 70.76528591                            |
| 0.324345105                            | -234.9388683                           | 0.019221131                                  | 0.981718083                    | 73.46630012                            |
| 0.315166892                            | 115.560199                             | 0.022832567                                  | 0.985850623                    | 76.44550681                            |
| 0.381543548                            | 155.1303278                            | 0.029989795                                  | 0.989295593                    | 60.62399423                            |
| 0.297558317                            | -230.5969932                           | 0.017281233                                  | 0.985525746                    | 64.48850117                            |
| 0.365246511                            | -173.6256443                           | 0.033557655                                  | 0.990302573                    | 52.106224                              |
| 0.358582961                            | -12.95349738                           | 0.032792337                                  | 0.991618763                    | 51.69792864                            |
| 0.359384717                            | -244.8194564                           | 0.026265651                                  | 0.990759658                    | 64.57096869                            |
| 0.35678495                             | -8.607746253                           | 0.021056564                                  | 0.991352618                    | 59.73541756                            |
| 0.378852052                            | -267.2537831                           | 0.032159121                                  | 0.99307492                     | 71.06695234                            |
| 0.38571448                             | 180.4200737                            | 0.06664781                                   | 0.978706841                    | 59.28139093                            |
| 0.354896678                            | -74.35680501                           | 0.035121664                                  | 0.982203922                    | 56.58034397                            |
| 0.388469577                            | 48.31564167                            | 0.03729177                                   | 0.990280946                    | 44.0929934                             |
| 0.310206538                            | -50.39715892                           | 0.017544669                                  | 0.989804956                    | 85.66158385                            |
| 0.384038207                            | -89.66868588                           | 0.034697309                                  | 0.991120044                    | 44.59831912                            |
| 0.465247117                            | 85.48785743                            | 0.056175867                                  | 0.991738891                    | 34.28325869                            |
| 0.415662323                            | 263.8371405                            | 0.048131376                                  | 0.987117213                    | 53.83935728                            |
| 0.354604448                            | 46.41257603                            | 0.027432631                                  | 0.983416351                    | 39.16649397                            |
| 0.397110065                            | 119.6774387                            | 0.037877774                                  | 0.986989683                    | 42.03095921                            |
| 0.424472585                            | 121.2540218                            | 0.043106755                                  | 0.990245633                    | 44.60811263                            |
| 0.41555882                             | 279.6366532                            | 0.044769959                                  | 0.987371919                    | 51.62963599                            |
| 0.34592559                             | -306.6729146                           | 0.033560113                                  | 0.98772376                     | 82.68190197                            |
| 0.356685565                            | -75.73540994                           | 0.017778083                                  | 0.988749146                    | 63.80207309                            |
| 0.353956147                            | -117.8150275                           | 0.025921651                                  | 0.990979029                    | 67.96482428                            |
| 0.382769255                            | -416.3742824                           | 0.039653303                                  | 0.988321399                    | 53.66699349                            |
| 0.431014285                            | 128.7411398                            | 0.061345603                                  | 0.980897707                    | 45.94293299                            |
| 0.420537013                            | 357.4992244                            | 0.048182415                                  | 0.989984149                    | 58.6879224                             |
| 0.43299907                             | 115.9588174                            | 0.042280402                                  | 0.993071268                    | 49.0428767                             |
| 0.473373627                            | -12.66268219                           | 0.067601705                                  | 0.991164754                    | 31.16041371                            |
| 0.415469613                            | 261.6596594                            | 0.033964121                                  | 0.991572524                    | 57.35589283                            |
| 0.33582128                             | 62.77657435                            | 0.023202056                                  | 0.987859904                    | 49.9103079                             |
| 0.336691688                            | -23.92014264                           | 0.022315885                                  | 0.988491001                    | 60.88916153                            |
| 0.316035047                            | 17.84900053                            | 0.021057827                                  | 0.98762683                     | 75.52812975                            |
| 0.33723363                             | -205.0353489                           | 0.026713966                                  | 0.991329773                    | 79.13444312                            |
| 0.466601275                            | 396.142503                             | 0.078807298                                  | 0.991422484                    | 54.96136155                            |
| 0.343055644                            | -83.95036654                           | 0.026025903                                  | 0.986837616                    | 52.79215411                            |
| 0.449208777                            | -20.57411916                           | 0.044235715                                  | 0.985190473                    | 21.82645469                            |
| 0.409740544                            | 118.4888619                            | 0.032823098                                  | 0.988695707                    | 66.50128249                            |
| 0.383644612                            | -162.2555353                           | 0.034780646                                  | 0.993911535                    | 60.33888018                            |
| 0.360281565                            | -98.9426252                            | 0.027574596                                  | 0.989347125                    | 56.20380541                            |
| 0.304858139                            | -133.8099282                           | 0.018282284                                  | 0.980668748                    | 56.02813803                            |
| 0.326349238                            | -3.811463219                           | 0.027027213                                  | 0.976012804                    | 45.72335987                            |
| 0.340945754                            | 458.1761228                            | 0.025382388                                  | 0.986369177                    | 77.63302196                            |
| 0.397209267                            | 587.0741199                            | 0.044628524                                  | 0.98875703                     | 80.42737882                            |
| 0.359120973                            | 201.8803001                            | 0.022832186                                  | 0.988097421                    | 74.31319472                            |
| 0.393025616                            | -10.46570019                           | 0.02997178                                   | 0.987894795                    | 45.18822644                            |
| 0.351452484                            | 17.23654544                            | 0.026484287                                  | 0.991604044                    | 69.20553694                            |
| 0.294580126                            | -470.2707202                           | 0.013890825                                  | 0.986778028                    | 102.1324177                            |
| 0.414830092                            | 240.1956873                            | 0.043101544                                  | 0.988915872                    | 46.24424254                            |
| 0.367584497                            | -71.29568292                           | 0.02819494                                   | 0.991580945                    | 67.18090463                            |
| 0.353736618                            | -154.5547882                           | 0.02514154                                   | 0.991682612                    | 48.98811703                            |
| 0.338677511                            | 149.9526198                            | 0.022151482                                  | 0.992508493                    | 85.79958442                            |
| 0.344595229                            | -48.6565969                            | 0.032323381                                  | 0.990810743                    | 71.2492766                             |
| 0.418105554                            | -52.99175185                           | 0.038047086                                  | 0.991202059                    | 40.34642129                            |
| 0.355521967                            | -37.33178973                           | 0.028467836                                  | 0.985871402                    | 53.34212603                            |
| 0.336754075                            | -144.7451871                           | 0.025970987                                  | 0.988339718                    | 54.71623029                            |
| 0.371825732                            | -237.6101117                           | 0.036540864                                  | 0.990348011                    | 57.71898803                            |
| 0.35325533                             | -377.4448126                           | 0.031969524                                  | 0.990642613                    | 76.23768237                            |
| 0.310455841                            | -218.0138575                           | 0.019656311                                  | 0.988630127                    | 82.61999596                            |
| 0.332716068                            | 146.6225453                            | 0.02092567                                   | 0.990589488                    | 64.35593879                            |
| 0.493805791                            | 88.23875186                            | 0.088434169                                  | 0.980276364                    | 28.25340834                            |
| 0.34019617                             | -210.9405262                           | 0.019120034                                  | 0.989528182                    | 67.69313482                            |
| 0.404789888                            | 204.472983                             | 0.028012005                                  | 0.98781601                     | 55.37210265                            |
| 0.343053537                            | -15.88803896                           | 0.025609644                                  | 0.988265919                    | 80.03497812                            |
| 0.394561086                            | 95.14178524                            | 0.034377233                                  | 0.990173243                    | 46.73589213                            |
| 0.384484513                            | -9.061016294                           | 0.045613085                                  | 0.962968556                    | 23.18164341                            |
| 0.387907292                            | -9.26366888                            | 0.050539539                                  | 0.984167241                    | 50.15995791                            |
| 0.362774019                            | 182.7293838                            | 0.028126055                                  | 0.990769931                    | 54.94520207                            |
| 0.323448994                            | 12.98011293                            | 0.022665963                                  | 0.984565381                    | 62.01622366                            |
| 0.362189545                            | -168.1696914                           | 0.030657258                                  | 0.985938243                    | 45.61620627                            |
| 0.382752823                            | -49.12891222                           | 0.03431139                                   | 0.991959361                    | 50.05339494                            |
| 0.398059129                            | 24.13488065                            | 0.028024277                                  | 0.989673658                    | 45.39461819                            |
| 0.209947725                            | -1176.388904                           | 0.015323125                                  | 0.977882633                    | 169.6977252                            |
| 0.444885771                            | 65.57731324                            | 0.055513172                                  | 0.991509205                    | 35.48302457                            |
| 0.409608182                            | 113.7522411                            | 0.050337417                                  | 0.982831454                    | 50.16662276                            |
| 0.470760685                            | 111.6784339                            | 0.070980464                                  | 0.985238662                    | 31.92416608                            |
| 0.235600112                            | -390.0865274                           | 0.014734373                                  | 0.980812123                    | 121.0482855                            |

| log.sigma.4.0.mm.3D_glc_m_Contrast | log.sigma.4.0.mm.3D_glc_m_DifferenceEntropy | log.sigma.4.0.mm.3D_glc_m_InverseVariance | log.sigma.4.0.mm.3D_glc_m_Entropy | log.sigma.4.0.mm.3D_glc_m_Dissimilarity |
|------------------------------------|---------------------------------------------|-------------------------------------------|-----------------------------------|-----------------------------------------|
| 13.85315388                        | 2.951905136                                 | 0.340173886                               | 7.611852756                       | 2.658547845                             |
| 9.682125509                        | 2.780747931                                 | 0.352394346                               | 7.272659952                       | 2.300959693                             |
| 13.18391504                        | 2.972590052                                 | 0.313732703                               | 7.544015476                       | 2.741054439                             |
| 8.228760181                        | 2.66671735                                  | 0.365581697                               | 7.234535232                       | 2.140283748                             |
| 7.186956267                        | 2.518802913                                 | 0.407973119                               | 6.532343836                       | 1.871685086                             |
| 7.059816828                        | 2.56575868                                  | 0.39100078                                | 6.851195614                       | 1.952362545                             |
| 4.189341142                        | 2.200500716                                 | 0.420551419                               | 5.869557065                       | 1.419665399                             |
| 9.226355975                        | 2.713406779                                 | 0.376240689                               | 7.312783673                       | 2.192315558                             |
| 10.87099117                        | 2.835505788                                 | 0.35037226                                | 7.453368584                       | 2.379946091                             |
| 11.44599199                        | 2.887060622                                 | 0.327396551                               | 7.702081531                       | 2.570899069                             |
| 5.434323278                        | 2.40080635                                  | 0.417508759                               | 6.51944718                        | 1.677513334                             |
| 11.60566214                        | 2.877485563                                 | 0.328746511                               | 7.485091469                       | 2.577206                                |
| 5.732527055                        | 2.444008299                                 | 0.408854078                               | 6.632562226                       | 1.711432041                             |
| 8.512271606                        | 2.696323208                                 | 0.360302889                               | 7.185733076                       | 2.226762618                             |
| 16.13111546                        | 3.014813409                                 | 0.331262804                               | 7.693161828                       | 2.830579272                             |
| 12.20204946                        | 2.914808                                    | 0.324374162                               | 7.58932076                        | 2.457145774                             |
| 10.10115125                        | 2.771489636                                 | 0.357203603                               | 7.204314185                       | 2.321350452                             |
| 8.207517408                        | 2.642853985                                 | 0.387095236                               | 7.10209424                        | 2.047575166                             |
| 10.84776372                        | 2.809499555                                 | 0.334462682                               | 7.151171064                       | 2.442505897                             |
| 8.322224833                        | 2.671789787                                 | 0.37654151                                | 7.252040748                       | 2.109916759                             |
| 11.54977204                        | 2.88870866                                  | 0.34050243                                | 7.604730986                       | 2.503363277                             |
| 9.530391208                        | 2.748955281                                 | 0.354882645                               | 7.363790489                       | 2.302776968                             |
| 10.42832571                        | 2.828281011                                 | 0.339567736                               | 7.595162449                       | 2.435253357                             |
| 9.175052776                        | 2.702516903                                 | 0.358969195                               | 7.190109225                       | 2.269750872                             |
| 12.16660283                        | 2.930946966                                 | 0.319710201                               | 7.733878479                       | 2.655216308                             |
| 15.38345261                        | 3.06285116                                  | 0.309500678                               | 7.708031684                       | 2.887073975                             |
| 8.184972457                        | 2.664253051                                 | 0.362760331                               | 7.256717958                       | 2.125498706                             |
| 13.69481289                        | 3.005169321                                 | 0.30125556                                | 7.771767137                       | 2.852372935                             |
| 10.40040443                        | 2.786758474                                 | 0.352185291                               | 7.254580775                       | 2.345741616                             |
| 11.98739138                        | 2.874673367                                 | 0.353208718                               | 7.371624373                       | 2.471351121                             |
| 10.55294429                        | 2.805146878                                 | 0.359028011                               | 7.510647099                       | 2.356783154                             |
| 10.40236932                        | 2.807103572                                 | 0.353077082                               | 7.511932226                       | 2.370322056                             |
| 9.332881582                        | 2.699327291                                 | 0.379704342                               | 7.294959268                       | 2.195851433                             |
| 12.8002188                         | 2.802091291                                 | 0.358072453                               | 6.778707894                       | 2.441942021                             |
| 12.03467246                        | 2.875705561                                 | 0.338392093                               | 7.287974601                       | 2.51781227                              |
| 8.547201851                        | 2.687248691                                 | 0.373268577                               | 7.103278332                       | 2.131650039                             |
| 14.57532243                        | 3.036492555                                 | 0.313051901                               | 7.955283675                       | 2.848653305                             |
| 8.316231319                        | 2.681430184                                 | 0.370811848                               | 7.095269426                       | 2.12594815                              |
| 4.937186814                        | 2.328514136                                 | 0.419735319                               | 6.418446788                       | 1.60642062                              |
| 7.242071663                        | 2.568130462                                 | 0.392324871                               | 6.893676975                       | 1.943684513                             |
| 9.355034766                        | 2.748973178                                 | 0.351294465                               | 7.07818705                        | 2.3094596                               |
| 7.954753505                        | 2.638507642                                 | 0.379917181                               | 6.966586813                       | 2.060541405                             |
| 6.944303541                        | 2.546349067                                 | 0.397966442                               | 6.880958195                       | 1.884964212                             |
| 9.344822562                        | 2.651327647                                 | 0.387716887                               | 6.912818338                       | 2.072291292                             |
| 18.02427973                        | 3.098680839                                 | 0.319688729                               | 7.889476867                       | 2.917035685                             |
| 8.548096569                        | 2.703610167                                 | 0.357493378                               | 7.494407371                       | 2.232550512                             |
| 11.51647704                        | 2.877791321                                 | 0.344399687                               | 7.612387208                       | 2.472079059                             |
| 11.18546994                        | 2.810051339                                 | 0.371232685                               | 7.07421877                        | 2.339148861                             |
| 6.722951329                        | 2.430583031                                 | 0.396738801                               | 6.236458948                       | 1.871959159                             |
| 8.314517569                        | 2.633144806                                 | 0.38843363                                | 6.818258377                       | 2.014518446                             |
| 6.941300498                        | 2.532130041                                 | 0.402708352                               | 6.895509301                       | 1.853623133                             |
| 6.373817797                        | 2.43029292                                  | 0.419144762                               | 6.293636095                       | 1.687577652                             |
| 6.89757272                         | 2.545641256                                 | 0.398812628                               | 7.066786649                       | 1.903133933                             |
| 12.68826241                        | 2.833597198                                 | 0.34780077                                | 7.260214202                       | 2.544617352                             |
| 10.86027625                        | 2.838959559                                 | 0.337498412                               | 7.568038352                       | 2.480706366                             |
| 14.17011566                        | 3.010616514                                 | 0.320170622                               | 7.80514623                        | 2.80639821                              |
| 14.57890409                        | 2.991966317                                 | 0.331349375                               | 7.751398792                       | 2.713618222                             |
| 7.606423403                        | 2.557909156                                 | 0.392544284                               | 6.615743563                       | 1.837065297                             |
| 10.86469582                        | 2.848838653                                 | 0.337287329                               | 7.290608497                       | 2.472216835                             |
| 4.53812657                         | 2.292559375                                 | 0.429764993                               | 6.225791011                       | 1.598150621                             |
| 8.564491169                        | 2.670734536                                 | 0.383608607                               | 7.312180229                       | 2.059444169                             |
| 10.59651034                        | 2.791298689                                 | 0.367732892                               | 7.372659285                       | 2.287170237                             |
| 10.76042503                        | 2.814590114                                 | 0.351809846                               | 7.387772585                       | 2.386582097                             |
| 11.83748094                        | 2.891448383                                 | 0.306111185                               | 7.520390331                       | 2.690894977                             |
| 12.77840224                        | 2.887309911                                 | 0.326612362                               | 7.114181959                       | 2.666756638                             |
| 12.20827961                        | 2.898359277                                 | 0.341190489                               | 7.435040937                       | 2.557271541                             |
| 9.358115948                        | 2.722154721                                 | 0.36656463                                | 7.117711413                       | 2.171646333                             |
| 11.40543585                        | 2.848058387                                 | 0.355502879                               | 7.591781526                       | 2.421062744                             |
| 8.030733191                        | 2.610808169                                 | 0.387892591                               | 6.955050974                       | 2.061607272                             |
| 11.30626914                        | 2.869483614                                 | 0.342187899                               | 7.567993956                       | 2.469896219                             |
| 17.02920063                        | 3.141251345                                 | 0.297790611                               | 8.207098073                       | 3.094222418                             |
| 8.099524384                        | 2.573400305                                 | 0.398609529                               | 6.778984699                       | 1.976591185                             |
| 10.12100408                        | 2.795164092                                 | 0.356234678                               | 7.515923131                       | 2.320842906                             |
| 9.959215998                        | 2.793021272                                 | 0.347016661                               | 7.36199651                        | 2.353987145                             |
| 12.44188662                        | 2.918500154                                 | 0.337486513                               | 7.832451774                       | 2.572995187                             |
| 13.13392054                        | 2.951836327                                 | 0.338517742                               | 7.594739174                       | 2.620923991                             |
| 7.763853749                        | 2.592288038                                 | 0.397689379                               | 6.848933281                       | 1.967774942                             |
| 10.12449913                        | 2.771898645                                 | 0.348429575                               | 7.204534584                       | 2.364016773                             |
| 11.76996781                        | 2.877737021                                 | 0.339016453                               | 7.455506557                       | 2.548705853                             |
| 10.33052433                        | 2.80504713                                  | 0.360795461                               | 7.33639429                        | 2.32563057                              |
| 17.53189488                        | 3.054954673                                 | 0.341149896                               | 7.446094558                       | 2.820732776                             |
| 16.34833366                        | 3.10225227                                  | 0.311351469                               | 7.9025339                         | 2.970308118                             |
| 11.31957496                        | 2.875452046                                 | 0.332927356                               | 7.559352795                       | 2.528555614                             |
| 5.70921714                         | 2.280082433                                 | 0.421577933                               | 5.743397666                       | 1.601623583                             |
| 10.50154715                        | 2.825168734                                 | 0.340300196                               | 7.63125382                        | 2.439010393                             |
| 7.464957371                        | 2.601256646                                 | 0.390320896                               | 7.171914116                       | 1.982251165                             |
| 12.73373014                        | 2.923495121                                 | 0.337710327                               | 7.647177396                       | 2.585013911                             |
| 7.492637916                        | 2.601174351                                 | 0.382542658                               | 7.029302845                       | 2.020377596                             |
| 7.136373041                        | 2.293206487                                 | 0.38448087                                | 5.858889181                       | 2.031700139                             |
| 8.165818053                        | 2.63753589                                  | 0.365601728                               | 6.782869915                       | 2.113941408                             |
| 9.857499985                        | 2.78138382                                  | 0.359687039                               | 7.339085103                       | 2.310000369                             |
| 11.96979827                        | 2.894947721                                 | 0.322489988                               | 7.47405846                        | 2.607530014                             |
| 9.285238779                        | 2.747250656                                 | 0.357021476                               | 7.150172748                       | 2.281753163                             |
| 8.541279524                        | 2.683451722                                 | 0.374838079                               | 7.170452083                       | 2.14460178                              |
| 7.315471729                        | 2.595703412                                 | 0.384756828                               | 7.127707718                       | 1.995039285                             |
| 39.99929003                        | 3.70006275                                  | 0.203766292                               | 8.509425498                       | 4.839679495                             |
| 5.522935134                        | 2.407558865                                 | 0.41351154                                | 6.440155238                       | 1.707161812                             |
| 6.643354338                        | 2.413636337                                 | 0.391773413                               | 6.481364632                       | 1.918365112                             |
| 5.145668497                        | 2.338856926                                 | 0.418568824                               | 6.24059803                        | 1.611133738                             |
| 23.65952271                        | 3.347824054                                 | 0.238814615                               | 8.27834965                        | 3.777626691                             |

| log.sigma.4.0.mm.3D_glcm_DifferenceVariance | log.sigma.4.0.mm.3D_glcm_ldn | log.sigma.4.0.mm.3D_glcm_ldm | log.sigma.4.0.mm.3D_glcm_Correlation | log.sigma.4.0.mm.3D_glcm_Autocorrelation |
|---------------------------------------------|------------------------------|------------------------------|--------------------------------------|------------------------------------------|
| 6.555846735                                 | 0.921536354                  | 0.342389527                  | 0.730182418                          | 212.3324787                              |
| 4.239438374                                 | 0.930330198                  | 0.368200662                  | 0.711749292                          | 256.6354795                              |
| 5.455498401                                 | 0.915903046                  | 0.319398053                  | 0.661282022                          | 199.4824403                              |
| 3.506994663                                 | 0.927863202                  | 0.376574908                  | 0.735126044                          | 168.3432529                              |
| 3.480750993                                 | 0.920630521                  | 0.438905739                  | 0.760454974                          | 100.2369427                              |
| 3.142174509                                 | 0.926155544                  | 0.407117982                  | 0.729808705                          | 132.8377314                              |
| 2.016549193                                 | 0.931771356                  | 0.516933644                  | 0.806629275                          | 77.70310298                              |
| 4.299564467                                 | 0.94075238                   | 0.380488317                  | 0.763938296                          | 317.4280461                              |
| 5.082267662                                 | 0.92634856                   | 0.36525108                   | 0.720532711                          | 199.1504787                              |
| 4.655411465                                 | 0.937747029                  | 0.326589167                  | 0.727622747                          | 565.1049751                              |
| 2.5319537                                   | 0.930355049                  | 0.456957819                  | 0.723328525                          | 151.6283061                              |
| 4.740657602                                 | 0.922603811                  | 0.324537674                  | 0.654448482                          | 242.1841079                              |
| 2.725549539                                 | 0.94139574                   | 0.453119591                  | 0.726061191                          | 185.7831815                              |
| 3.426494802                                 | 0.916478949                  | 0.359814979                  | 0.687742776                          | 137.2588235                              |
| 7.598365808                                 | 0.922097412                  | 0.337814049                  | 0.657863293                          | 237.0903629                              |
| 5.912898653                                 | 0.938157799                  | 0.382751351                  | 0.716083989                          | 370.472326                               |
| 4.5114693                                   | 0.935783143                  | 0.36649075                   | 0.691476102                          | 363.9796741                              |
| 3.853660167                                 | 0.942859732                  | 0.408091051                  | 0.748953854                          | 298.6970029                              |
| 4.552003256                                 | 0.921749658                  | 0.347395333                  | 0.619513321                          | 254.6916199                              |
| 3.751493888                                 | 0.929087738                  | 0.389107212                  | 0.7482578                            | 234.5763273                              |
| 5.09015157                                  | 0.938076101                  | 0.347239153                  | 0.671879699                          | 349.3576859                              |
| 4.04057643                                  | 0.946447017                  | 0.359458061                  | 0.732136365                          | 360.0639754                              |
| 4.332100994                                 | 0.930643416                  | 0.342586835                  | 0.722931487                          | 285.7355256                              |
| 3.686814498                                 | 0.921390704                  | 0.370170185                  | 0.769375212                          | 193.5003095                              |
| 4.884651489                                 | 0.909618398                  | 0.324345105                  | 0.715058221                          | 194.0508762                              |
| 6.792114497                                 | 0.922093042                  | 0.315166892                  | 0.66620617                           | 347.9081705                              |
| 3.515810291                                 | 0.930715923                  | 0.381543548                  | 0.758667916                          | 216.4364598                              |
| 5.316564136                                 | 0.917573475                  | 0.297558317                  | 0.650615638                          | 280.3642129                              |
| 4.63708141                                  | 0.93524107                   | 0.365246511                  | 0.668374407                          | 327.0487927                              |
| 5.661948958                                 | 0.940610006                  | 0.358582961                  | 0.625157845                          | 363.0231862                              |
| 4.848274068                                 | 0.936733408                  | 0.359384717                  | 0.718371494                          | 407.573376                               |
| 4.598712396                                 | 0.937944004                  | 0.35678495                   | 0.701739492                          | 313.723301                               |
| 4.313810208                                 | 0.945167928                  | 0.378852052                  | 0.768159852                          | 493.5157108                              |
| 6.244801701                                 | 0.912172474                  | 0.385714448                  | 0.642543091                          | 155.9327893                              |
| 5.393786163                                 | 0.914659274                  | 0.354896678                  | 0.652037533                          | 225.7890433                              |
| 3.889618458                                 | 0.93506417                   | 0.388469577                  | 0.672476763                          | 286.2405369                              |
| 6.205586049                                 | 0.932002627                  | 0.310206538                  | 0.709271974                          | 438.2204714                              |
| 3.691506768                                 | 0.93700157                   | 0.384038207                  | 0.684837231                          | 359.5677592                              |
| 2.222352046                                 | 0.940393968                  | 0.465247117                  | 0.74428746                           | 195.2276713                              |
| 3.3043176                                   | 0.926735481                  | 0.415662323                  | 0.759630666                          | 128.0134866                              |
| 3.871122472                                 | 0.913999276                  | 0.354604448                  | 0.612399562                          | 157.3988931                              |
| 3.563210149                                 | 0.925513288                  | 0.397110065                  | 0.677365904                          | 164.3047897                              |
| 3.299790738                                 | 0.936089899                  | 0.424472585                  | 0.730100572                          | 250.9867495                              |
| 4.829183045                                 | 0.931292302                  | 0.41555882                   | 0.690311799                          | 164.0918401                              |
| 9.029450503                                 | 0.931835613                  | 0.34592559                   | 0.639831738                          | 489.0865591                              |
| 3.455130979                                 | 0.927233067                  | 0.356685565                  | 0.763040823                          | 199.0836054                              |
| 5.206398109                                 | 0.937339069                  | 0.353956147                  | 0.711337959                          | 331.1334072                              |
| 5.540955265                                 | 0.932207439                  | 0.382769255                  | 0.65445823                           | 362.1568491                              |
| 2.825522062                                 | 0.912475562                  | 0.431014285                  | 0.745031534                          | 85.41650656                              |
| 4.136738716                                 | 0.936841894                  | 0.420537013                  | 0.750629675                          | 171.4543342                              |
| 3.406229476                                 | 0.946364039                  | 0.43299907                   | 0.751036459                          | 315.5110857                              |
| 3.429563412                                 | 0.942844506                  | 0.473373627                  | 0.661032777                          | 270.9563945                              |
| 3.186986527                                 | 0.939496937                  | 0.415469613                  | 0.784100604                          | 192.0859564                              |
| 5.756026835                                 | 0.928562185                  | 0.33582128                   | 0.602356426                          | 416.842801                               |
| 4.526183098                                 | 0.927432039                  | 0.336691688                  | 0.697517711                          | 304.6427717                              |
| 6.012907739                                 | 0.925795035                  | 0.316035047                  | 0.685559982                          | 335.4370978                              |
| 6.920567462                                 | 0.939809031                  | 0.33723363                   | 0.689947495                          | 609.3112406                              |
| 4.105370451                                 | 0.944178113                  | 0.466601275                  | 0.75727341                           | 197.0025186                              |
| 4.572419017                                 | 0.923220992                  | 0.343055644                  | 0.658785227                          | 349.4222276                              |
| 1.911659913                                 | 0.918918186                  | 0.449208777                  | 0.656668617                          | 126.956252                               |
| 4.220948877                                 | 0.933384152                  | 0.409740544                  | 0.771320426                          | 245.3408839                              |
| 5.199754388                                 | 0.949645407                  | 0.383644612                  | 0.700406432                          | 446.3630845                              |
| 4.840111031                                 | 0.932367731                  | 0.360281565                  | 0.680215373                          | 314.029046                               |
| 4.34666936                                  | 0.904631586                  | 0.304858139                  | 0.65192359                           | 228.9171695                              |
| 5.1208102                                   | 0.899379777                  | 0.326349238                  | 0.566544825                          | 165.384578                               |
| 5.443829757                                 | 0.923700784                  | 0.340945754                  | 0.728072994                          | 192.5492571                              |
| 4.507089903                                 | 0.932291348                  | 0.397209267                  | 0.78945881                           | 174.0493135                              |
| 5.400640922                                 | 0.929698437                  | 0.359120973                  | 0.734477434                          | 261.6803704                              |
| 3.612745604                                 | 0.928129825                  | 0.393025616                  | 0.693289637                          | 263.1689732                              |
| 5.011149295                                 | 0.938840225                  | 0.351452484                  | 0.717291952                          | 443.7821203                              |
| 7.138928192                                 | 0.923149238                  | 0.294580126                  | 0.714684535                          | 430.8614349                              |
| 4.036800401                                 | 0.933687415                  | 0.414830092                  | 0.697285472                          | 229.2761734                              |
| 4.573336607                                 | 0.939199899                  | 0.367584497                  | 0.737366249                          | 306.4728322                              |
| 4.25093127                                  | 0.938158285                  | 0.353736618                  | 0.661261637                          | 375.1297362                              |
| 5.653842098                                 | 0.94233702                   | 0.338677511                  | 0.745770569                          | 358.8717769                              |
| 6.057323974                                 | 0.937270243                  | 0.344595229                  | 0.685848995                          | 335.9166438                              |
| 3.762498083                                 | 0.939900175                  | 0.418105554                  | 0.676916001                          | 270.5239134                              |
| 4.249268252                                 | 0.921391328                  | 0.355521967                  | 0.680106955                          | 229.1931135                              |
| 4.965366282                                 | 0.9280131                    | 0.336754075                  | 0.648761402                          | 353.6813935                              |
| 4.768512708                                 | 0.935823968                  | 0.371825732                  | 0.696193944                          | 394.070097                               |
| 9.305184855                                 | 0.941022244                  | 0.35325533                   | 0.627752821                          | 708.0598867                              |
| 7.221437102                                 | 0.92969195                   | 0.310455841                  | 0.672225079                          | 439.7818742                              |
| 4.770132955                                 | 0.933966336                  | 0.332716068                  | 0.699136418                          | 358.8886681                              |
| 2.752734977                                 | 0.91691153                   | 0.493805791                  | 0.663421171                          | 79.37582074                              |
| 4.375226249                                 | 0.930560936                  | 0.34019617                   | 0.730297656                          | 356.3629782                              |
| 3.459056224                                 | 0.928072936                  | 0.404789888                  | 0.762326783                          | 118.3595917                              |
| 5.847284409                                 | 0.92948785                   | 0.343053537                  | 0.723713849                          | 319.5544201                              |
| 3.281951474                                 | 0.933848844                  | 0.394561086                  | 0.720653195                          | 218.4216361                              |
| 2.09483966                                  | 0.875303808                  | 0.384484513                  | 0.533673851                          | 66.01008456                              |
| 3.481816267                                 | 0.917658504                  | 0.387907292                  | 0.715062467                          | 175.0973046                              |
| 4.408772979                                 | 0.935970868                  | 0.362774019                  | 0.696322966                          | 310.7399676                              |
| 4.965613812                                 | 0.916858549                  | 0.323448994                  | 0.675992044                          | 258.6412879                              |
| 3.928985662                                 | 0.920999685                  | 0.362189545                  | 0.661835176                          | 236.5361683                              |
| 3.790135444                                 | 0.9401229                    | 0.382752823                  | 0.707935134                          | 384.2736265                              |
| 3.231531113                                 | 0.932369632                  | 0.398059129                  | 0.721533143                          | 182.3339908                              |
| 15.73839313                                 | 0.900980755                  | 0.209947725                  | 0.62182396                           | 571.4626078                              |
| 2.507372337                                 | 0.939239105                  | 0.444885771                  | 0.728412623                          | 248.7684465                              |
| 2.554016315                                 | 0.913935713                  | 0.409608182                  | 0.761382813                          | 98.33412615                              |
| 2.400978185                                 | 0.923320825                  | 0.470760685                  | 0.720905121                          | 77.01130491                              |
| 8.833467519                                 | 0.905507392                  | 0.235600112                  | 0.673564724                          | 373.8501505                              |

| log.sigma.4.0.mm.3D_glc_m_SumEntropy | log.sigma.4.0.mm.3D_glc_m_AverageIntensity | log.sigma.4.0.mm.3D_glc_m_Energy | log.sigma.4.0.mm.3D_glc_m_SumSquares | log.sigma.4.0.mm.3D_glc_m_ClusterProminence |
|--------------------------------------|--------------------------------------------|----------------------------------|--------------------------------------|---------------------------------------------|
| 5.153209838                          | 13.95532288                                | 0.008328657                      | 26.30372141                          | 19747.95717                                 |
| 4.860162176                          | 15.67766995                                | 0.010304346                      | 17.27510277                          | 10424.56024                                 |
| 4.954099633                          | 13.67528414                                | 0.007862961                      | 19.61733296                          | 12969.68467                                 |
| 4.847852912                          | 12.52792753                                | 0.010407295                      | 15.57900943                          | 8924.678957                                 |
| 4.612815377                          | 9.416750402                                | 0.020930897                      | 15.14605121                          | 7425.467788                                 |
| 4.64228724                           | 11.09596207                                | 0.014935053                      | 13.23505096                          | 7460.658842                                 |
| 4.265090122                          | 8.274050983                                | 0.033415676                      | 11.3128907                           | 4140.006184                                 |
| 5.009621855                          | 17.45884713                                | 0.010320941                      | 19.98193239                          | 16148.36576                                 |
| 4.970045881                          | 13.63158754                                | 0.009103065                      | 19.83621063                          | 11731.80782                                 |
| 5.099371011                          | 23.50745044                                | 0.007053385                      | 20.57165818                          | 18585.48308                                 |
| 4.468350614                          | 12.01993337                                | 0.01763017                       | 9.848934254                          | 3506.860284                                 |
| 4.899826787                          | 15.23229016                                | 0.00810263                       | 17.04850626                          | 10297.75099                                 |
| 4.540045132                          | 13.34518318                                | 0.018197151                      | 10.62741362                          | 5340.273339                                 |
| 4.769911951                          | 11.3059612                                 | 0.00977985                       | 13.67894206                          | 6130.547843                                 |
| 5.064422787                          | 14.96282081                                | 0.007316613                      | 24.17516751                          | 19741.70774                                 |
| 5.056028543                          | 18.95664172                                | 0.011459406                      | 21.21129581                          | 19667.52412                                 |
| 4.827846076                          | 18.84433091                                | 0.01145347                       | 16.63931418                          | 14833.94327                                 |
| 4.856026465                          | 16.98810247                                | 0.011709016                      | 16.73311942                          | 10134.88364                                 |
| 4.7344381                            | 15.69490457                                | 0.009581839                      | 14.3862324                           | 6319.582266                                 |
| 4.898438313                          | 14.91022521                                | 0.010982986                      | 16.66733157                          | 11412.27913                                 |
| 4.944544714                          | 18.46181805                                | 0.008140648                      | 17.52991778                          | 13238.931                                   |
| 4.955596451                          | 18.71910118                                | 0.009289132                      | 17.54134919                          | 14464.62219                                 |
| 5.016551994                          | 16.56240708                                | 0.008086871                      | 19.26540034                          | 13553.02685                                 |
| 4.94787742                           | 13.34500075                                | 0.011078148                      | 19.98508467                          | 12844.54481                                 |
| 5.063512385                          | 13.36850232                                | 0.006481593                      | 21.40822574                          | 13822.17073                                 |
| 5.077794587                          | 18.33299471                                | 0.007227649                      | 23.29553698                          | 20885.58976                                 |
| 4.932429274                          | 14.27324511                                | 0.009375225                      | 17.41795046                          | 9735.414308                                 |
| 4.996649988                          | 16.41649399                                | 0.006519847                      | 19.99338741                          | 12646.62305                                 |
| 4.800550717                          | 17.87041948                                | 0.011363045                      | 15.8893655                           | 12604.80261                                 |
| 4.810077781                          | 18.88761604                                | 0.010576787                      | 15.69114315                          | 12016.46772                                 |
| 4.985358822                          | 19.94567005                                | 0.008691053                      | 18.63364369                          | 16559.08227                                 |
| 4.948204938                          | 17.42284914                                | 0.008326804                      | 17.72154899                          | 13785.23885                                 |
| 4.958603969                          | 21.90684287                                | 0.010768985                      | 19.81178019                          | 27736.54563                                 |
| 4.712873086                          | 12.01217276                                | 0.016309913                      | 18.02040243                          | 7772.151989                                 |
| 4.84670501                           | 14.6503408                                 | 0.009800318                      | 17.15375411                          | 9551.520698                                 |
| 4.716940877                          | 16.68113386                                | 0.011964305                      | 13.41104481                          | 6564.634223                                 |
| 5.195317078                          | 20.60365211                                | 0.006346341                      | 24.60347091                          | 27104.0817                                  |
| 4.730902856                          | 18.76431456                                | 0.011947029                      | 13.44132906                          | 7900.094175                                 |
| 4.47170693                           | 13.7072597                                 | 0.019737881                      | 9.805111375                          | 4113.501163                                 |
| 4.737117933                          | 10.7868291                                 | 0.014406502                      | 15.27035724                          | 8250.093255                                 |
| 4.62536649                           | 12.24488593                                | 0.010507551                      | 12.13038218                          | 4218.698806                                 |
| 4.644273083                          | 12.48075211                                | 0.012346087                      | 12.49642818                          | 4696.753885                                 |
| 4.673475806                          | 15.54537971                                | 0.013607925                      | 12.93365987                          | 5725.776353                                 |
| 4.703831621                          | 12.39387888                                | 0.015167153                      | 15.30971121                          | 8681.669512                                 |
| 5.14369555                           | 21.86138569                                | 0.007893786                      | 24.48394994                          | 25867.62304                                 |
| 5.020852571                          | 13.61340387                                | 0.007713914                      | 18.16197815                          | 11649.34161                                 |
| 5.030674976                          | 17.90152017                                | 0.008565662                      | 19.96689906                          | 19002.01895                                 |
| 4.69767637                           | 18.83033523                                | 0.013857846                      | 16.49094156                          | 13861.38371                                 |
| 4.525994834                          | 8.69401567                                 | 0.020901643                      | 13.16647108                          | 4559.225353                                 |
| 4.780154041                          | 12.62149093                                | 0.016041242                      | 17.06472602                          | 11432.26845                                 |
| 4.725710664                          | 17.50799794                                | 0.015136094                      | 14.26258393                          | 8677.887404                                 |
| 4.311325761                          | 16.27667779                                | 0.024685576                      | 9.452881503                          | 6095.383272                                 |
| 4.83327131                           | 13.4077633                                 | 0.01199089                       | 16.24285256                          | 9280.961817                                 |
| 4.796711258                          | 20.3102827                                 | 0.00898286                       | 15.6712317                           | 7595.539393                                 |
| 4.974507828                          | 17.15953517                                | 0.007663498                      | 18.42073471                          | 11161.77745                                 |
| 5.110419776                          | 18.00219838                                | 0.00683937                       | 22.7151906                           | 18926.43666                                 |
| 5.12545922                           | 24.44210708                                | 0.00772259                       | 23.38770684                          | 25666.9153                                  |
| 4.611541185                          | 13.63156023                                | 0.024660822                      | 16.01088665                          | 11955.08223                                 |
| 4.823423738                          | 18.46615361                                | 0.009475087                      | 16.30486644                          | 10342.23318                                 |
| 4.233942081                          | 11.07380615                                | 0.018850108                      | 6.591145314                          | 1490.855538                                 |
| 4.987914613                          | 15.20863923                                | 0.009967517                      | 18.96891504                          | 10528.70333                                 |
| 4.914700343                          | 20.88096026                                | 0.011067206                      | 17.3291685                           | 16012.30996                                 |
| 4.892087907                          | 17.48100281                                | 0.009391509                      | 17.1376277                           | 11588.50267                                 |
| 4.892947977                          | 14.75994541                                | 0.007123353                      | 16.96640474                          | 8501.527189                                 |
| 4.670791694                          | 12.53466248                                | 0.009561624                      | 14.62544053                          | 4792.579593                                 |
| 4.977626037                          | 13.29715445                                | 0.008814068                      | 22.85340742                          | 16582.40756                                 |
| 4.944161532                          | 12.53136151                                | 0.012503223                      | 22.94753659                          | 19628.38049                                 |
| 5.060379994                          | 15.75955332                                | 0.008207568                      | 22.14793877                          | 14325.97512                                 |
| 4.715524364                          | 15.93250211                                | 0.01177153                       | 13.30473991                          | 6048.493453                                 |
| 5.02644654                           | 20.77244515                                | 0.00853552                       | 19.87412032                          | 17254.1769                                  |
| 5.320516312                          | 20.3480231                                 | 0.004847119                      | 29.42497268                          | 31605.43332                                 |
| 4.60256711                           | 14.83446753                                | 0.015843001                      | 13.73026653                          | 7365.087381                                 |
| 5.013842123                          | 17.16490541                                | 0.009062607                      | 19.58004868                          | 17652.71857                                 |
| 4.799892751                          | 19.19953854                                | 0.009475356                      | 14.6617742                           | 9349.151583                                 |
| 5.203097538                          | 18.53119012                                | 0.00713606                       | 24.41536927                          | 26473.25823                                 |
| 5.024711864                          | 18.02949235                                | 0.008681761                      | 21.10648332                          | 20452.05644                                 |
| 4.616483826                          | 16.21720678                                | 0.014623424                      | 12.21569024                          | 6980.235911                                 |
| 4.806282527                          | 14.78105221                                | 0.010076437                      | 15.90876286                          | 9215.202938                                 |
| 4.85063921                           | 18.61551309                                | 0.009543562                      | 16.89446856                          | 12102.83896                                 |
| 4.841928285                          | 19.63702304                                | 0.011789918                      | 17.04429593                          | 15149.45327                                 |
| 4.968059179                          | 26.4630113                                 | 0.010617788                      | 23.2103989                           | 34190.81333                                 |
| 5.157286644                          | 20.6926856                                 | 0.006915133                      | 24.1260924                           | 27163.0126                                  |
| 4.971702019                          | 18.65676178                                | 0.00797875                       | 18.9844704                           | 14632.74338                                 |
| 4.150773021                          | 8.586647607                                | 0.03214015                       | 8.490656369                          | 1813.804105                                 |
| 5.048943176                          | 18.57053546                                | 0.007361289                      | 19.82170402                          | 16051.43991                                 |
| 4.853247415                          | 10.31337191                                | 0.010321472                      | 15.709265                            | 8154.160968                                 |
| 5.137848166                          | 17.4669695                                 | 0.008002942                      | 23.54798907                          | 20935.87791                                 |
| 4.739079385                          | 14.44792                                   | 0.011982793                      | 13.63174817                          | 6108.696859                                 |
| 4.074135303                          | 7.873312164                                | 0.021522571                      | 7.579504114                          | 1014.358337                                 |
| 4.71643076                           | 12.8280106                                 | 0.014506169                      | 14.58144399                          | 8027.879488                                 |
| 4.849479091                          | 17.37773203                                | 0.009379477                      | 16.58046145                          | 8057.713099                                 |
| 4.942667829                          | 15.71714355                                | 0.007908633                      | 18.85614871                          | 10713.35261                                 |
| 4.727251048                          | 15.0809745                                 | 0.010837381                      | 13.72536126                          | 7921.599631                                 |
| 4.774643051                          | 19.39978627                                | 0.01235399                       | 14.69830804                          | 11205.62168                                 |
| 4.771765888                          | 13.14666454                                | 0.010996669                      | 13.19992046                          | 6691.876889                                 |
| 5.587839542                          | 23.42251346                                | 0.00395368                       | 51.42871732                          | 87842.18058                                 |
| 4.463303594                          | 15.53297945                                | 0.019285595                      | 10.25148993                          | 4353.803129                                 |
| 4.620029252                          | 9.349444553                                | 0.016132648                      | 14.20249427                          | 5239.087657                                 |
| 4.366513943                          | 8.385049691                                | 0.023415572                      | 9.267458645                          | 2971.845977                                 |
| 5.408620003                          | 18.82146485                                | 0.00437786                       | 36.14642225                          | 45573.68714                                 |

| log.sigma.4.0.mm.3D_glc_m_SumAverage | log.sigma.4.0.mm.3D_glc_m_lmc2 | log.sigma.4.0.mm.3D_glc_m_lmc1 | log.sigma.4.0.mm.3D_glc_m_DifferenceAverage | log.sigma.4.0.mm.3D_glc_m_Id |
|--------------------------------------|--------------------------------|--------------------------------|---------------------------------------------|------------------------------|
| 27.82250903                          | 0.921756664                    | -0.227883399                   | 2.658547845                                 | 0.418406101                  |
| 31.27793864                          | 0.861543916                    | -0.178295341                   | 2.300959693                                 | 0.442079319                  |
| 27.32324001                          | 0.859060743                    | -0.168415458                   | 2.741054439                                 | 0.401117323                  |
| 25.05236865                          | 0.860657537                    | -0.179721021                   | 2.140283748                                 | 0.450053038                  |
| 18.8335008                           | 0.915387485                    | -0.254430706                   | 1.871685086                                 | 0.498189904                  |
| 22.19192413                          | 0.862398076                    | -0.189027765                   | 1.952362545                                 | 0.474112858                  |
| 16.54810197                          | 0.91162046                     | -0.27819499                    | 1.419665399                                 | 0.564205486                  |
| 34.77705178                          | 0.908687525                    | -0.22043325                    | 2.192315558                                 | 0.45137534                   |
| 27.20954427                          | 0.87834203                     | -0.184599898                   | 2.379946091                                 | 0.439153748                  |
| 46.89416846                          | 0.861841253                    | -0.169953248                   | 2.570899069                                 | 0.408067558                  |
| 24.03986674                          | 0.852940251                    | -0.191470179                   | 1.677513334                                 | 0.514271201                  |
| 30.41106405                          | 0.833891582                    | -0.155208571                   | 2.577206                                    | 0.406456246                  |
| 26.6864693                           | 0.851941864                    | -0.188164288                   | 1.711432041                                 | 0.511704195                  |
| 22.6119224                           | 0.833270477                    | -0.160993815                   | 2.226762618                                 | 0.436017073                  |
| 29.77724364                          | 0.875620265                    | -0.185250059                   | 2.830579272                                 | 0.413380662                  |
| 37.69456611                          | 0.878572689                    | -0.1879084                     | 2.457145774                                 | 0.453860243                  |
| 37.54985263                          | 0.869392373                    | -0.189149073                   | 2.321350452                                 | 0.440182224                  |
| 33.84751924                          | 0.888049866                    | -0.207781345                   | 2.047575166                                 | 0.473694831                  |
| 31.36141537                          | 0.845869776                    | -0.173037263                   | 2.442505897                                 | 0.425805433                  |
| 29.80936269                          | 0.872895062                    | -0.188627063                   | 2.109916759                                 | 0.459157557                  |
| 36.74312743                          | 0.801235569                    | -0.137195658                   | 2.503363277                                 | 0.424046127                  |
| 37.25900469                          | 0.880158333                    | -0.192901957                   | 2.302776968                                 | 0.435237435                  |
| 32.99377779                          | 0.844999164                    | -0.160699779                   | 2.435253357                                 | 0.421479597                  |
| 26.6900015                           | 0.922356556                    | -0.245229718                   | 2.269750872                                 | 0.443128824                  |
| 26.73700463                          | 0.838523105                    | -0.155113487                   | 2.655216308                                 | 0.405500853                  |
| 36.47525009                          | 0.87340462                     | -0.1762874                     | 2.887073975                                 | 0.396599323                  |
| 28.51629965                          | 0.892021261                    | -0.206639875                   | 2.125498706                                 | 0.454355855                  |
| 32.71993251                          | 0.791064952                    | -0.126733575                   | 2.852372935                                 | 0.38360041                   |
| 35.58738266                          | 0.823843355                    | -0.159549803                   | 2.345741616                                 | 0.439455614                  |
| 37.58142275                          | 0.812868112                    | -0.14545403                    | 2.471351121                                 | 0.43250049                   |
| 39.70122109                          | 0.856201153                    | -0.170639476                   | 2.356783154                                 | 0.434301711                  |
| 34.72013214                          | 0.834906714                    | -0.157915469                   | 2.370322056                                 | 0.432427372                  |
| 43.72971428                          | 0.89874876                     | -0.212195606                   | 2.195851433                                 | 0.449847258                  |
| 24.02434553                          | 0.930251309                    | -0.269459621                   | 2.441942021                                 | 0.453524947                  |
| 29.30068161                          | 0.881121282                    | -0.195727396                   | 2.51781227                                  | 0.430001577                  |
| 33.30729418                          | 0.830588477                    | -0.160476831                   | 2.131650039                                 | 0.458605793                  |
| 41.00905162                          | 0.855697353                    | -0.16064011                    | 2.848653305                                 | 0.392736919                  |
| 37.44284321                          | 0.826184736                    | -0.157292459                   | 2.12594815                                  | 0.455514177                  |
| 27.41451941                          | 0.878842485                    | -0.224437998                   | 1.60642062                                  | 0.521719657                  |
| 21.5736582                           | 0.891462313                    | -0.215484544                   | 1.943684513                                 | 0.480718865                  |
| 24.48977185                          | 0.800122195                    | -0.141842094                   | 2.3094596                                   | 0.431610448                  |
| 24.96150422                          | 0.826938859                    | -0.164206542                   | 2.060541405                                 | 0.465671426                  |
| 31.08438564                          | 0.863568433                    | -0.18874556                    | 1.884964212                                 | 0.48802119                   |
| 24.77991921                          | 0.880721975                    | -0.20614081                    | 2.072291292                                 | 0.479614049                  |
| 43.49320218                          | 0.855981846                    | -0.167486423                   | 2.917035685                                 | 0.419948706                  |
| 27.21834379                          | 0.872117646                    | -0.181286643                   | 2.232550512                                 | 0.433905795                  |
| 35.61001314                          | 0.851890682                    | -0.165814073                   | 2.472079059                                 | 0.429459621                  |
| 37.49800967                          | 0.845928453                    | -0.169999684                   | 2.339148861                                 | 0.451445901                  |
| 17.38803134                          | 0.941376886                    | -0.308981104                   | 1.871959159                                 | 0.492988294                  |
| 25.20695055                          | 0.916714774                    | -0.244595534                   | 2.014518446                                 | 0.483745802                  |
| 34.92696218                          | 0.877677234                    | -0.201443503                   | 1.853623133                                 | 0.49472273                   |
| 32.54268028                          | 0.846051421                    | -0.190202953                   | 1.687577652                                 | 0.526953173                  |
| 26.79136521                          | 0.888631021                    | -0.207314935                   | 1.903133933                                 | 0.480746811                  |
| 40.37425681                          | 0.854229487                    | -0.175287903                   | 2.544617352                                 | 0.414668306                  |
| 34.18333762                          | 0.83857988                     | -0.155896878                   | 2.480706366                                 | 0.416472923                  |
| 35.7822682                           | 0.862090537                    | -0.168315957                   | 2.80639821                                  | 0.397116048                  |
| 48.71003576                          | 0.869064906                    | -0.176174886                   | 2.713618222                                 | 0.414605826                  |
| 27.21445554                          | 0.896763547                    | -0.2282799                     | 1.837065297                                 | 0.521636778                  |
| 36.82000156                          | 0.846336283                    | -0.165489104                   | 2.472216835                                 | 0.421427008                  |
| 22.14761229                          | 0.795538124                    | -0.158782191                   | 1.598150621                                 | 0.508771097                  |
| 30.38731595                          | 0.903560367                    | -0.21404428                    | 2.059444169                                 | 0.47528572                   |
| 41.66163768                          | 0.849159804                    | -0.168933894                   | 2.287170237                                 | 0.453305315                  |
| 34.79356694                          | 0.855387997                    | -0.172519341                   | 2.386582097                                 | 0.435057389                  |
| 29.51989082                          | 0.818988204                    | -0.144188623                   | 2.690894977                                 | 0.391152948                  |
| 25.06932497                          | 0.862793701                    | -0.181764328                   | 2.666756638                                 | 0.406655522                  |
| 26.54528491                          | 0.883687755                    | -0.19150848                    | 2.557271541                                 | 0.418476189                  |
| 25.00152243                          | 0.93079917                     | -0.25332547                    | 2.171646333                                 | 0.465382547                  |
| 31.3634546                           | 0.877582728                    | -0.183250875                   | 2.421062744                                 | 0.433504649                  |
| 31.86500422                          | 0.870051055                    | -0.196658949                   | 2.061607272                                 | 0.461961477                  |
| 41.43923332                          | 0.866454327                    | -0.177472964                   | 2.469896219                                 | 0.427624187                  |
| 40.47573897                          | 0.853188047                    | -0.155027638                   | 3.094222418                                 | 0.378375631                  |
| 29.64690345                          | 0.867076593                    | -0.197383364                   | 1.976591185                                 | 0.479417769                  |
| 34.18665636                          | 0.865263133                    | -0.177484668                   | 2.320842906                                 | 0.441168921                  |
| 38.22928664                          | 0.790366218                    | -0.134726475                   | 2.353987145                                 | 0.430798673                  |
| 36.90376747                          | 0.881613535                    | -0.182896908                   | 2.572995187                                 | 0.416959057                  |
| 35.85193167                          | 0.861235431                    | -0.172882886                   | 2.620923991                                 | 0.420550171                  |
| 32.39565522                          | 0.845050031                    | -0.176570946                   | 1.967774942                                 | 0.481838243                  |
| 29.55554361                          | 0.862152673                    | -0.184327901                   | 2.364016773                                 | 0.431881485                  |
| 37.03716247                          | 0.804878319                    | -0.142312757                   | 2.548705853                                 | 0.415392421                  |
| 39.10069559                          | 0.830784771                    | -0.157273077                   | 2.32563057                                  | 0.443925555                  |
| 52.66361485                          | 0.898108766                    | -0.203798869                   | 2.820732776                                 | 0.425333751                  |
| 41.14412246                          | 0.850804909                    | -0.157651313                   | 2.970308118                                 | 0.39150181                   |
| 37.18161245                          | 0.84870939                     | -0.163032768                   | 2.528555614                                 | 0.413111705                  |
| 17.17329521                          | 0.899878691                    | -0.275202268                   | 1.601623583                                 | 0.543410386                  |
| 36.98898137                          | 0.851019226                    | -0.165233295                   | 2.439010393                                 | 0.419631307                  |
| 20.62674382                          | 0.873280265                    | -0.188498533                   | 1.982251165                                 | 0.472058418                  |
| 34.79631494                          | 0.90112309                     | -0.204685818                   | 2.585013911                                 | 0.420101878                  |
| 28.88520983                          | 0.852078779                    | -0.178917672                   | 2.020377596                                 | 0.46424864                   |
| 15.74662433                          | 0.870430444                    | -0.239207233                   | 2.031700139                                 | 0.455872731                  |
| 25.65602121                          | 0.911540589                    | -0.244730637                   | 2.113941408                                 | 0.459092697                  |
| 34.60992207                          | 0.838287606                    | -0.158874817                   | 2.310000369                                 | 0.43731916                   |
| 31.37576081                          | 0.876466996                    | -0.183122635                   | 2.607530014                                 | 0.405836585                  |
| 30.16194901                          | 0.8222392606                   | -0.15487564                    | 2.281753163                                 | 0.43734899                   |
| 38.6721027                           | 0.833600549                    | -0.163856085                   | 2.14460178                                  | 0.453863886                  |
| 26.29071518                          | 0.839348019                    | -0.166792213                   | 1.995039285                                 | 0.467151073                  |
| 46.4322079                           | 0.933035968                    | -0.216827739                   | 4.839679495                                 | 0.299095941                  |
| 31.0659589                           | 0.861726789                    | -0.202188919                   | 1.707161812                                 | 0.505110247                  |
| 18.69888911                          | 0.934060095                    | -0.290259763                   | 1.918365112                                 | 0.476352469                  |
| 16.77009938                          | 0.87598044                     | -0.222414721                   | 1.611133738                                 | 0.525973271                  |
| 37.38732307                          | 0.903382239                    | -0.190160108                   | 3.777626691                                 | 0.328187182                  |

| log.sigma.4.0.mm.3D_glcm_ClusterTendency | log.sigma.4.0.mm.3D_firstorder_InterquartileRange | log.sigma.4.0.mm.3D_firstorder_Skewness | log.sigma.4.0.mm.3D_firstorder_Uniformity |
|------------------------------------------|---------------------------------------------------|-----------------------------------------|-------------------------------------------|
| 88.98999399                              | 180.5195675                                       | 0.265666925                             | 0.059931219                               |
| 57.83949885                              | 137.0218058                                       | 0.192842013                             | 0.075141                                  |
| 64.49218095                              | 141.6388931                                       | -0.265721254                            | 0.069468224                               |
| 53.95894662                              | 123.300663                                        | 0.376875193                             | 0.075438463                               |
| 53.39724855                              | 123.0043411                                       | 0.670552998                             | 0.095610598                               |
| 45.88038703                              | 96.8779633                                        | 0.629232326                             | 0.092262371                               |
| 41.06222166                              | 134.639472                                        | 0.730495793                             | 0.11819299                                |
| 69.4060688                               | 143.6617546                                       | 0.190978301                             | 0.06898664                                |
| 67.01708916                              | 155.5563221                                       | 0.366557921                             | 0.06884197                                |
| 72.77504034                              | 147.9437408                                       | -0.264914594                            | 0.063858109                               |
| 33.96141374                              | 97.64597702                                       | 0.383096589                             | 0.099603124                               |
| 55.46876745                              | 125.4713211                                       | -0.101582598                            | 0.071568474                               |
| 36.63905873                              | 91.72904587                                       | 0.523694257                             | 0.098371018                               |
| 46.20349665                              | 116.7877653                                       | -0.10849859                             | 0.077303975                               |
| 77.78987894                              | 154.9183216                                       | 0.618001126                             | 0.063005362                               |
| 73.16590396                              | 141.9928665                                       | -0.050353023                            | 0.069149563                               |
| 55.91562632                              | 113.4626627                                       | -0.422975356                            | 0.077817956                               |
| 57.24634691                              | 147.9901085                                       | 0.450477859                             | 0.075419922                               |
| 46.0118726                               | 135.4285879                                       | -0.012404184                            | 0.076237354                               |
| 58.01364596                              | 122.3147488                                       | -0.075025824                            | 0.076211284                               |
| 58.90022137                              | 129.1875443                                       | -0.332655042                            | 0.070928751                               |
| 61.48813104                              | 131.7557621                                       | 0.08065965                              | 0.072192247                               |
| 64.75055054                              | 128.3145523                                       | 0.190270226                             | 0.069652947                               |
| 70.76528591                              | 156.6198635                                       | 0.059438766                             | 0.070040532                               |
| 73.46630012                              | 156.4807072                                       | -0.33531882                             | 0.062345594                               |
| 76.44550681                              | 145.944376                                        | 0.13803672                              | 0.064291123                               |
| 60.62399423                              | 146.8988048                                       | 0.380746136                             | 0.069187593                               |
| 64.48850117                              | 146.288697                                        | -0.388090059                            | 0.066828832                               |
| 52.106224                                | 111.6764736                                       | -0.428909407                            | 0.080546595                               |
| 51.69792864                              | 120.8684502                                       | -0.129522911                            | 0.074246131                               |
| 64.57096869                              | 134.0911036                                       | -0.516868712                            | 0.068593539                               |
| 59.73541756                              | 136.9509077                                       | 0.027472347                             | 0.06944792                                |
| 71.06695234                              | 123.7654066                                       | -0.498139776                            | 0.073812032                               |
| 59.28139093                              | 165.541605                                        | 0.302842864                             | 0.078193818                               |
| 56.58034397                              | 126.5713443                                       | -0.197370311                            | 0.072650353                               |
| 44.0929934                               | 107.8599148                                       | 0.097375612                             | 0.083882262                               |
| 85.66158385                              | 148.0304279                                       | -0.176094584                            | 0.059823465                               |
| 44.59831912                              | 102.2927999                                       | -0.348859267                            | 0.085486666                               |
| 34.28325869                              | 93.4124707                                        | 0.247967355                             | 0.099357205                               |
| 53.83935728                              | 130.6536741                                       | 0.676349355                             | 0.085001435                               |
| 39.16649397                              | 122.6876187                                       | 0.095209949                             | 0.081442106                               |
| 42.03095921                              | 127.2146826                                       | 0.401914562                             | 0.082617483                               |
| 44.60811263                              | 125.2008686                                       | 0.261151605                             | 0.084117843                               |
| 51.62963599                              | 123.9729023                                       | 0.733818242                             | 0.086442542                               |
| 82.68190197                              | 129.8574533                                       | -0.49193496                             | 0.064751939                               |
| 63.80207309                              | 141.2217062                                       | -0.162573082                            | 0.067367832                               |
| 67.96482428                              | 132.3073163                                       | -0.186256468                            | 0.068133622                               |
| 53.66699349                              | 96.48866105                                       | -1.004661685                            | 0.090057853                               |
| 45.94293299                              | 131.2830319                                       | 0.507293784                             | 0.092764448                               |
| 58.6879224                               | 139.0712686                                       | 0.765223745                             | 0.083296019                               |
| 49.0428767                               | 114.4219885                                       | 0.228472487                             | 0.085409157                               |
| 31.16041371                              | 74.46293736                                       | -0.162221584                            | 0.118763618                               |
| 57.35589283                              | 138.4738541                                       | 0.531025919                             | 0.075129035                               |
| 49.9103079                               | 134.2098684                                       | 0.030917711                             | 0.072914243                               |
| 60.88916153                              | 147.6648636                                       | 0.002674145                             | 0.066491165                               |
| 75.52812975                              | 149.8394423                                       | 0.049873069                             | 0.061150038                               |
| 79.13444312                              | 142.9455023                                       | -0.406823834                            | 0.066400815                               |
| 54.96136155                              | 103.0481009                                       | 0.975535363                             | 0.105163743                               |
| 52.79215411                              | 114.7542195                                       | -0.271891096                            | 0.077024667                               |
| 21.82645469                              | 82.960392                                         | -0.321090354                            | 0.112323299                               |
| 66.50128249                              | 156.030056                                        | 0.186981732                             | 0.067271898                               |
| 60.33888018                              | 120.7303171                                       | -0.346861686                            | 0.077098415                               |
| 56.20380541                              | 128.3591404                                       | -0.140831377                            | 0.072753716                               |
| 56.02813803                              | 155.0722108                                       | -0.256400001                            | 0.067354956                               |
| 45.72335987                              | 149.832572                                        | -0.033949955                            | 0.073323758                               |
| 77.63302196                              | 174.6575298                                       | 0.626352848                             | 0.067312543                               |
| 80.42737882                              | 153.7293916                                       | 0.830500998                             | 0.074017031                               |
| 74.31319472                              | 157.3304644                                       | 0.3415532                               | 0.065284426                               |
| 45.18822644                              | 120.4086342                                       | -0.091846683                            | 0.080882305                               |
| 69.20553694                              | 137.3626108                                       | -0.021972927                            | 0.06740202                                |
| 102.1324177                              | 183.783619                                        | -0.399335092                            | 0.05244722                                |
| 46.24424254                              | 104.5649796                                       | 0.667167245                             | 0.091849959                               |
| 67.18090463                              | 133.9178848                                       | -0.045033427                            | 0.0706234                                 |
| 48.98811703                              | 119.8689804                                       | -0.404727547                            | 0.075523739                               |
| 85.79958442                              | 157.1894755                                       | 0.076568933                             | 0.060327194                               |
| 71.2492766                               | 146.812623                                        | -0.063484584                            | 0.067668514                               |
| 40.34642129                              | 99.20548344                                       | -0.241015055                            | 0.091433594                               |
| 53.34212603                              | 127.0383663                                       | -0.033002441                            | 0.077340662                               |
| 54.71623029                              | 114.051908                                        | -0.294597485                            | 0.076433335                               |
| 57.71898803                              | 105.8839965                                       | -0.493953385                            | 0.08020446                                |
| 76.23768237                              | 111.7029538                                       | -0.623198674                            | 0.077446141                               |
| 82.61999596                              | 134.185123                                        | -0.428543797                            | 0.065213016                               |
| 64.35593879                              | 135.1485977                                       | 0.129391631                             | 0.067856557                               |
| 28.25340834                              | 113.43015                                         | 0.594219242                             | 0.118382329                               |
| 67.69313482                              | 142.5494661                                       | -0.386479064                            | 0.065094813                               |
| 55.37210265                              | 142.283041                                        | 0.469525239                             | 0.07324946                                |
| 80.03497812                              | 142.2399845                                       | -0.043195794                            | 0.062659377                               |
| 46.73589213                              | 122.7800732                                       | 0.256018409                             | 0.081243765                               |
| 23.18164341                              | 122.2653103                                       | 0.000988141                             | 0.104457113                               |
| 50.15995791                              | 107.2635574                                       | -0.059842012                            | 0.084194394                               |
| 54.94520207                              | 143.0409317                                       | 0.431708045                             | 0.072080063                               |
| 62.01622366                              | 141.438942                                        | -0.081343941                            | 0.067273807                               |
| 45.61620627                              | 106.6097685                                       | -0.590457281                            | 0.084569341                               |
| 50.05339494                              | 103.7681427                                       | -0.150785093                            | 0.082563369                               |
| 45.39461819                              | 115.4510765                                       | 0.097851011                             | 0.080078619                               |
| 169.6977252                              | 235.9721298                                       | -0.614158005                            | 0.045829836                               |
| 35.48302457                              | 91.03699017                                       | 0.256986505                             | 0.103905225                               |
| 50.16662276                              | 154.6460991                                       | 0.355047287                             | 0.07988689                                |
| 31.92416608                              | 96.73387003                                       | 0.637493112                             | 0.107922957                               |
| 121.0482855                              | 186.5674133                                       | -0.385603757                            | 0.049815426                               |

| log.sigma.4.0.mm.3D_firstorder_MeanAbsoluteDeviation | log.sigma.4.0.mm.3D_firstorder_Energy | log.sigma.4.0.mm.3D_firstorder_RobustMeanAbsoluteDeviation | log.sigma.4.0.mm.3D_firstorder_Median |
|------------------------------------------------------|---------------------------------------|------------------------------------------------------------|---------------------------------------|
| 103.1646392                                          | 39914702.36                           | 74.31129659                                                | 110.4634399                           |
| 82.0194923                                           | 41751894.76                           | 57.23453885                                                | 85.86351013                           |
| 85.81964718                                          | 14150147.24                           | 59.08398397                                                | 40.76102066                           |
| 78.3829759                                           | 49841800.02                           | 53.67216797                                                | 89.75480652                           |
| 78.50309945                                          | 14188955.98                           | 54.47371085                                                | 45.87165833                           |
| 67.90931383                                          | 19832536.06                           | 42.48264296                                                | 49.89552689                           |
| 72.97277352                                          | 13295290.64                           | 55.20160216                                                | 37.74140167                           |
| 87.85412095                                          | 48720769.09                           | 59.34863034                                                | 104.1186829                           |
| 88.96246906                                          | 55118928.97                           | 64.17320236                                                | 107.1015015                           |
| 90.32975032                                          | 70758668.23                           | 61.73454466                                                | 97.29753876                           |
| 61.3536345                                           | 24848847.11                           | 41.73748138                                                | 74.99407959                           |
| 80.28900423                                          | 31351557.95                           | 53.87949543                                                | 90.58778381                           |
| 63.1830853                                           | 36880230.7                            | 40.21444713                                                | 63.17995834                           |
| 73.22341985                                          | 25284112.69                           | 50.20321932                                                | 70.30644226                           |
| 95.8965351                                           | 38618744.53                           | 64.85744861                                                | 82.38533401                           |
| 89.88616278                                          | 68731717.09                           | 59.90407361                                                | 50.14094925                           |
| 78.14617567                                          | 22834745.44                           | 48.63419144                                                | 61.03133774                           |
| 82.71116361                                          | 72226437.55                           | 60.21943972                                                | 116.5418472                           |
| 76.25672699                                          | 22213837.59                           | 54.69210094                                                | 99.29914474                           |
| 78.17484229                                          | 50612673.74                           | 52.24387748                                                | 75.46367645                           |
| 81.39223951                                          | 93127270.09                           | 54.05876358                                                | 52.53112221                           |
| 80.87317463                                          | 37709347.42                           | 53.92453691                                                | 76.56671906                           |
| 83.62992854                                          | 70089591.5                            | 55.45848561                                                | 65.03215027                           |
| 90.80458431                                          | 18921579.93                           | 65.13920764                                                | 57.05234718                           |
| 93.61553163                                          | 35914085.91                           | 66.53964635                                                | 35.42722511                           |
| 93.15119234                                          | 37510382.76                           | 61.91233384                                                | 104.4871101                           |
| 84.61251164                                          | 38189534.17                           | 60.03112885                                                | 67.84184265                           |
| 86.89842301                                          | 54298455.98                           | 60.24636218                                                | 77.42855835                           |
| 75.76392099                                          | 57078677.19                           | 48.05139474                                                | 77.44163513                           |
| 79.29827416                                          | 53555885.78                           | 50.7650429                                                 | 75.44591522                           |
| 84.66532605                                          | 80698085.02                           | 55.93576366                                                | 89.50206375                           |
| 83.35626029                                          | 128143786.6                           | 56.53110981                                                | 114.0666809                           |
| 83.41237255                                          | 52418080.38                           | 53.30833825                                                | 81.29885864                           |
| 92.08104378                                          | 11454571.89                           | 70.30102881                                                | 84.7095108                            |
| 80.27585942                                          | 12221809.84                           | 54.15771557                                                | 51.97660446                           |
| 70.34117507                                          | 46232310.98                           | 46.76108433                                                | 69.80947876                           |
| 97.1909645                                           | 94728423.91                           | 63.54630936                                                | 101.1873703                           |
| 68.95861921                                          | 50847877.41                           | 44.26633171                                                | 80.49082947                           |
| 62.03476711                                          | 14469458.53                           | 40.42019284                                                | 45.39864349                           |
| 78.33950843                                          | 34574917.35                           | 54.66222908                                                | 83.52592468                           |
| 70.79841984                                          | 21311651.95                           | 49.73656241                                                | 84.06551361                           |
| 73.28257164                                          | 34627675.78                           | 52.53436267                                                | 83.12303162                           |
| 72.67972539                                          | 54372427.97                           | 51.90328951                                                | 86.94786835                           |
| 77.79539603                                          | 35481459.13                           | 52.24509156                                                | 72.1868515                            |
| 93.73018368                                          | 65885809.55                           | 58.9543743                                                 | 62.13419724                           |
| 83.91653242                                          | 60649871.92                           | 58.94709654                                                | 82.44489288                           |
| 86.18517874                                          | 74817305.23                           | 55.78177746                                                | 84.05160522                           |
| 74.11059193                                          | 16862895.1                            | 43.66016101                                                | 42.28700256                           |
| 74.88540908                                          | 8204634.595                           | 55.57177118                                                | 54.53925133                           |
| 82.10106033                                          | 23208388.42                           | 56.30852841                                                | 77.02233505                           |
| 73.95028304                                          | 73423588.19                           | 49.20530542                                                | 80.26910019                           |
| 54.44007874                                          | 21000654.67                           | 32.37508124                                                | 62.18640518                           |
| 82.07768974                                          | 97672146.18                           | 58.07084451                                                | 104.6702881                           |
| 79.6626379                                           | 20672543.83                           | 55.07085473                                                | 81.49378967                           |
| 86.47675998                                          | 94170872                              | 61.24938173                                                | 106.0024185                           |
| 93.94618316                                          | 33876584.52                           | 62.86665545                                                | 56.21142387                           |
| 90.25352611                                          | 76567713.51                           | 59.64891996                                                | 91.43475342                           |
| 74.70960439                                          | 38023647.89                           | 47.37775331                                                | 48.49665642                           |
| 75.96962503                                          | 20598273.45                           | 49.96617389                                                | 70.19846344                           |
| 50.19607072                                          | 16798078.47                           | 34.23702439                                                | 89.29424286                           |
| 88.84308772                                          | 91795236.89                           | 65.41682451                                                | 124.9402542                           |
| 79.31537984                                          | 102932263.3                           | 51.13206027                                                | 80.20233917                           |
| 79.87973577                                          | 45553560.27                           | 53.54735571                                                | 94.75169373                           |
| 85.50774215                                          | 39720030.92                           | 62.92692508                                                | 103.7581902                           |
| 82.20387412                                          | 13590558.1                            | 62.20696827                                                | 116.0394211                           |
| 97.25705852                                          | 44477304.85                           | 70.8315443                                                 | 91.33415985                           |
| 93.84823959                                          | 25094891.58                           | 64.18336452                                                | 66.60555267                           |
| 92.27472845                                          | 105425248.3                           | 64.67777476                                                | 112.355484                            |
| 71.28637404                                          | 19764890.77                           | 49.22963653                                                | 79.86642456                           |
| 88.09507772                                          | 49824361.27                           | 58.00326934                                                | 72.39105988                           |
| 109.9679108                                          | 104818087.9                           | 76.50985137                                                | 104.1530457                           |
| 70.77280785                                          | 40960538.26                           | 46.00591648                                                | 87.99728394                           |
| 84.72568172                                          | 116977437                             | 56.59907861                                                | 104.9243164                           |
| 76.39424272                                          | 113975839.8                           | 51.23869466                                                | 94.26741028                           |
| 97.10172955                                          | 112483033.8                           | 65.30362031                                                | 94.16007614                           |
| 91.70030016                                          | 49766216.42                           | 61.91540936                                                | 73.62129211                           |
| 65.26104411                                          | 27495260.7                            | 41.81623811                                                | 61.14022446                           |
| 77.05433997                                          | 28125580.1                            | 53.24103404                                                | 96.31303406                           |
| 77.24703512                                          | 51767728.6                            | 49.17460969                                                | 75.97558212                           |
| 76.67117911                                          | 60900791.9                            | 46.71161455                                                | 54.64432907                           |
| 83.25896706                                          | 25669806.89                           | 48.49024928                                                | 65.53549576                           |
| 92.6702348                                           | 49697397.08                           | 58.49391675                                                | 64.30639648                           |
| 86.78632148                                          | 58353265.87                           | 58.29192179                                                | 95.81608963                           |
| 62.16665928                                          | 5914916.959                           | 46.38165147                                                | 53.24175644                           |
| 88.10396887                                          | 89301097.03                           | 59.34510029                                                | 105.1760712                           |
| 80.81458979                                          | 65109771.39                           | 58.4673434                                                 | 79.6776619                            |
| 93.83837497                                          | 34522161.06                           | 61.35882098                                                | 89.78142929                           |
| 73.59495266                                          | 55283401.72                           | 51.54151482                                                | 86.30812073                           |
| 60.57857508                                          | 6563441.646                           | 49.11129669                                                | 104.9044342                           |
| 74.36308114                                          | 9539260.871                           | 49.21829838                                                | 72.81263351                           |
| 82.72166124                                          | 78632393.22                           | 59.20564289                                                | 102.8961639                           |
| 84.61109824                                          | 23921242.21                           | 58.02094369                                                | 97.3546524                            |
| 69.73322774                                          | 15489424.38                           | 45.24501644                                                | 47.90473557                           |
| 72.98878867                                          | 65666252                              | 45.18603947                                                | 70.14796448                           |
| 71.49135837                                          | 103577493.3                           | 48.2750667                                                 | 112.8311653                           |
| 143.5250045                                          | 28823421.53                           | 98.65736661                                                | 63.25636101                           |
| 61.79195543                                          | 22229471.89                           | 40.94504989                                                | 64.67415619                           |
| 81.33382436                                          | 10163293.13                           | 63.14081931                                                | 108.5610542                           |
| 60.49920018                                          | 9645692.752                           | 40.36275803                                                | 53.52959442                           |
| 118.6256635                                          | 29921742.48                           | 80.07061866                                                | 68.401474                             |

| log.sigma.4.0.mm.3D_firstorder_TotalEnergy | log.sigma.4.0.mm.3D_firstorder_Maximum | log.sigma.4.0.mm.3D_firstorder_RootMeanSquared | log.sigma.4.0.mm.3D_firstorder_90Percentile | log.sigma.4.0.mm.3D_firstorder_Minimum |
|--------------------------------------------|----------------------------------------|------------------------------------------------|---------------------------------------------|----------------------------------------|
| 1077696964                                 | 508.9642334                            | 182.1518699                                    | 306.5983643                                 | -198.3729095                           |
| 1127301159                                 | 427.9973755                            | 144.4851113                                    | 250.7515503                                 | -257.9555359                           |
| 382053975.5                                | 376.4356995                            | 112.5018276                                    | 151.1998947                                 | -291.9514465                           |
| 1345728601                                 | 438.5185852                            | 142.5437189                                    | 244.6836121                                 | -194.9060822                           |
| 383101811.5                                | 330.6635742                            | 122.2762509                                    | 230.8338654                                 | -139.6258392                           |
| 535478473.7                                | 355.3322754                            | 110.0533369                                    | 200.0479416                                 | -196.6223145                           |
| 358972847.4                                | 305.6370544                            | 112.1531366                                    | 206.4350006                                 | -117.353508                            |
| 1315460765                                 | 504.7410889                            | 164.2927748                                    | 278.9687317                                 | -283.7278442                           |
| 1488211082                                 | 476.3285828                            | 164.9010841                                    | 277.3747925                                 | -199.0179138                           |
| 1910484042                                 | 443.6617432                            | 153.5013358                                    | 250.8547333                                 | -454.5973206                           |
| 670918872                                  | 314.737854                             | 117.2665223                                    | 207.1984222                                 | -185.6530609                           |
| 846492064.6                                | 425.0263977                            | 136.4047867                                    | 219.4013275                                 | -258.1670532                           |
| 995766229                                  | 399.2998047                            | 112.2114382                                    | 188.646286                                  | -246.8540039                           |
| 682671042.6                                | 352.4287415                            | 116.6543676                                    | 194.1882477                                 | -191.5140228                           |
| 1042706102                                 | 509.1394653                            | 157.9478059                                    | 258.3695923                                 | -242.8032532                           |
| 1855756361                                 | 460.2111816                            | 129.3333498                                    | 112.0380249                                 | -378.8318481                           |
| 616538126.9                                | 395.4154968                            | 119.2780605                                    | 177.9262207                                 | -381.5922546                           |
| 1950113814                                 | 511.9669495                            | 168.0342559                                    | 272.0957611                                 | -260.0113525                           |
| 599773615                                  | 391.2640991                            | 139.8371714                                    | 230.7146835                                 | -255.4546967                           |
| 1366542191                                 | 363.2749329                            | 132.085692                                     | 225.8798676                                 | -260.4897156                           |
| 2514436292                                 | 496.7239685                            | 115.7566724                                    | 175.3194962                                 | -377.3588867                           |
| 1018152380                                 | 592.1253052                            | 133.3380729                                    | 213.7807465                                 | -352.3625488                           |
| 1892418971                                 | 435.018158                             | 130.4143728                                    | 220.3036194                                 | -312.3344727                           |
| 510882658                                  | 365.12146                              | 135.537692                                     | 239.7291687                                 | -248.3393402                           |
| 969680319.5                                | 301.2964478                            | 117.4388848                                    | 165.1320282                                 | -280.0671387                           |
| 1012780334                                 | 464.8789368                            | 166.566401                                     | 279.2906647                                 | -314.0967407                           |
| 1031117423                                 | 405.6692505                            | 131.4249466                                    | 235.3072968                                 | -243.306778                            |
| 1466058311                                 | 407.2314789                            | 127.2176819                                    | 193.2326965                                 | -310.7629395                           |
| 1541124284                                 | 434.542572                             | 129.5869796                                    | 206.5204803                                 | -343.0074463                           |
| 1446008916                                 | 546.7841797                            | 130.2053383                                    | 206.4121002                                 | -359.099884                            |
| 2178848296                                 | 416.6679688                            | 139.5810841                                    | 221.7363373                                 | -397.0520935                           |
| 3459882239                                 | 533.6499023                            | 160.0898414                                    | 257.4404816                                 | -292.1000977                           |
| 1415288170                                 | 435.9195251                            | 143.9111632                                    | 235.705719                                  | -446.9565735                           |
| 309273441                                  | 387.4577332                            | 154.318109                                     | 264.8760986                                 | -169.4091797                           |
| 329988865.6                                | 304.9941406                            | 117.317089                                     | 191.9774887                                 | -276.6963196                           |
| 1248272396                                 | 375.8885803                            | 119.8801481                                    | 202.5616028                                 | -306.6171265                           |
| 2557667446                                 | 517.6179199                            | 162.9171791                                    | 270.312384                                  | -380.760437                            |
| 1372892690                                 | 350.9841309                            | 122.4538712                                    | 197.1958008                                 | -250.1433105                           |
| 390675380.2                                | 320.2022095                            | 98.74365286                                    | 170.1190521                                 | -356.7692566                           |
| 933522768.5                                | 422.0855103                            | 145.3747315                                    | 252.9933853                                 | -140.2893677                           |
| 575414602.6                                | 354.7653809                            | 127.2566871                                    | 214.8035507                                 | -195.3883209                           |
| 934947246.1                                | 394.1714478                            | 133.8776592                                    | 230.1230728                                 | -178.5074158                           |
| 1468055555                                 | 364.3085327                            | 134.0241782                                    | 228.1251068                                 | -265.4551086                           |
| 957999396.5                                | 441.8468323                            | 137.2335464                                    | 242.3341949                                 | -177.0245972                           |
| 1778916858                                 | 436.0883789                            | 137.3202208                                    | 210.9801498                                 | -461.0301514                           |
| 1637546542                                 | 415.1477356                            | 130.2497568                                    | 208.7185181                                 | -244.758316                            |
| 2020067241                                 | 523.9443359                            | 142.4699807                                    | 225.5401001                                 | -340.2112122                           |
| 455298167.7                                | 324.6190796                            | 105.4669698                                    | 126.9751091                                 | -417.1572266                           |
| 221525134.1                                | 301.097168                             | 120.6118753                                    | 223.2731064                                 | -116.9840469                           |
| 626626487.5                                | 486.8777771                            | 145.9181259                                    | 255.7681091                                 | -180.6888275                           |
| 1982436881                                 | 449.6086731                            | 135.75572                                      | 234.099823                                  | -305.0076599                           |
| 567017676                                  | 323.4584961                            | 103.6172332                                    | 165.3859329                                 | -323.17453                             |
| 2637147947                                 | 492.0683289                            | 160.3854869                                    | 274.4827087                                 | -188.3345947                           |
| 558158683.5                                | 373.5534668                            | 132.8674234                                    | 224.9581909                                 | -383.0102539                           |
| 2542613544                                 | 443.1139221                            | 154.6591392                                    | 253.7550659                                 | -276.175354                            |
| 914667782.1                                | 438.3588257                            | 133.9518802                                    | 209.888591                                  | -368.0892944                           |
| 2067328265                                 | 486.9122925                            | 152.8101249                                    | 242.8789917                                 | -487.5776367                           |
| 1026638493                                 | 454.2242737                            | 125.0388885                                    | 227.7682007                                 | -238.2750854                           |
| 556153383.1                                | 317.5547791                            | 122.528849                                     | 202.9084106                                 | -351.7255249                           |
| 453548118.8                                | 249.5477753                            | 109.343165                                     | 169.60867                                   | -173.7041931                           |
| 2478471396                                 | 443.5423889                            | 176.6698992                                    | 292.5136719                                 | -224.8750153                           |
| 2779171109                                 | 578.43573                              | 136.9645834                                    | 223.725943                                  | -404.6947632                           |
| 1229946127                                 | 429.1343079                            | 141.6291326                                    | 220.9362793                                 | -315.6098022                           |
| 1072440835                                 | 349.0704651                            | 145.8197512                                    | 230.6470657                                 | -238.5870361                           |
| 366945068.7                                | 355.3141479                            | 151.7723435                                    | 233.5597885                                 | -158.2566223                           |
| 1200887231                                 | 517.2658691                            | 169.779898                                     | 289.8205688                                 | -195.8855591                           |
| 677562072.6                                | 478.4535522                            | 154.0103217                                    | 274.7375977                                 | -178.649353                            |
| 2846481703                                 | 480.3119202                            | 171.9418704                                    | 296.2207031                                 | -243.2488403                           |
| 533652050.7                                | 315.5758667                            | 123.6368543                                    | 213.1482086                                 | -287.1577148                           |
| 1345257754                                 | 466.5295715                            | 140.9755193                                    | 236.2754028                                 | -422.1524658                           |
| 2830088373                                 | 462.9862061                            | 165.9088858                                    | 265.5483307                                 | -382.9991455                           |
| 1105934533                                 | 393.7525024                            | 140.975561                                     | 246.8370361                                 | -246.0521088                           |
| 3158390798                                 | 525.2277832                            | 158.11553                                      | 258.9031372                                 | -293.3361816                           |
| 3077347674                                 | 452.48703                              | 132.3069179                                    | 207.9685364                                 | -362.978363                            |
| 3037041913                                 | 626.309082                             | 162.4563861                                    | 266.6131104                                 | -349.0558777                           |
| 1343687843                                 | 568.8529663                            | 146.1154619                                    | 234.8300171                                 | -345.8927917                           |
| 742372038.8                                | 388.6207581                            | 108.052163                                     | 173.3213165                                 | -310.6419067                           |
| 759390662.8                                | 378.4158325                            | 143.860318                                     | 245.7254822                                 | -248.0049591                           |
| 1397728672                                 | 391.0390625                            | 125.7064635                                    | 194.8024826                                 | -374.2521362                           |
| 1644321381                                 | 374.5063782                            | 116.9459328                                    | 174.3470123                                 | -400.8699036                           |
| 693084786                                  | 456.5274353                            | 137.2848922                                    | 200.6227631                                 | -573.0613403                           |
| 1341829721                                 | 457.7301941                            | 136.7637638                                    | 199.3309967                                 | -443.7295532                           |
| 1575538179                                 | 477.1224365                            | 153.5793185                                    | 259.822879                                  | -340.4105835                           |
| 159702757.9                                | 273.841095                             | 106.3465686                                    | 190.3183502                                 | -114.7945328                           |
| 2411129620                                 | 419.7356262                            | 152.0625476                                    | 243.6506927                                 | -341.6448975                           |
| 1757963828                                 | 428.8503418                            | 136.901491                                     | 237.987886                                  | -144.7710266                           |
| 932098348.7                                | 458.6351013                            | 155.483706                                     | 259.6887512                                 | -313.9842224                           |
| 1492651847                                 | 401.053894                             | 134.7865021                                    | 231.3877625                                 | -246.9373627                           |
| 177212924.4                                | 233.6637573                            | 126.370267                                     | 202.3735199                                 | -57.42510986                           |
| 257560043.5                                | 300.7825623                            | 128.4675505                                    | 222.3043823                                 | -209.4291687                           |
| 2123074617                                 | 482.599823                             | 156.4878393                                    | 268.3776855                                 | -291.3833008                           |
| 645873539.6                                | 386.5813904                            | 147.1332151                                    | 243.4579346                                 | -254.3426819                           |
| 418214458.2                                | 286.5895996                            | 99.58114707                                    | 147.0591675                                 | -316.6665955                           |
| 1772988804                                 | 393.8118591                            | 122.8221742                                    | 196.0806915                                 | -379.9271545                           |
| 2796592318                                 | 439.7510681                            | 148.3565539                                    | 236.8793182                                 | -199.0449829                           |
| 778232381.4                                | 467.2836609                            | 180.5704308                                    | 222.7253098                                 | -543.5610962                           |
| 600195741                                  | 318.6906738                            | 112.2893108                                    | 200.1270905                                 | -288.6992798                           |
| 274408914.5                                | 356.0550842                            | 154.0974107                                    | 259.8827332                                 | -80.16239166                           |
| 260433704.3                                | 304.7786865                            | 104.2221983                                    | 184.2693817                                 | -115.0721283                           |
| 807887047                                  | 438.9031372                            | 161.0239723                                    | 232.5254379                                 | -390.8805237                           |

| log.sigma.4.0.mm.3D_firstorder_Entropy | log.sigma.4.0.mm.3D_firstorder_StandardDeviation | log.sigma.4.0.mm.3D_firstorder_Range | log.sigma.4.0.mm.3D_firstorder_Variance | log.sigma.4.0.mm.3D_firstorder_10Percentile |
|----------------------------------------|--------------------------------------------------|--------------------------------------|-----------------------------------------|---------------------------------------------|
| 4.307702255                            | 125.6557305                                      | 707.3371429                          | 15789.36262                             | -12.45160522                                |
| 4.016292677                            | 102.9759244                                      | 685.9529114                          | 10604.041                               | -8.491569614                                |
| 4.113297008                            | 109.0205744                                      | 668.387146                           | 11885.48564                             | -126.9604172                                |
| 3.992906744                            | 99.05076241                                      | 633.4246674                          | 9811.053534                             | -11.85199089                                |
| 3.771314473                            | 96.727953                                        | 470.2894135                          | 9356.296893                             | -23.35476341                                |
| 3.796170746                            | 90.36021687                                      | 551.9545898                          | 8164.968793                             | -37.89697647                                |
| 3.467270909                            | 85.4067494                                       | 422.9905624                          | 7294.312843                             | -10.30204468                                |
| 4.153963556                            | 112.6092288                                      | 788.4689331                          | 12680.8384                              | -0.504858887                                |
| 4.102838836                            | 108.8527792                                      | 675.3464966                          | 11848.92753                             | 1.721822071                                 |
| 4.224041558                            | 115.5940471                                      | 898.2590637                          | 13361.98373                             | -46.48553696                                |
| 3.607159418                            | 78.03785426                                      | 500.3909149                          | 6089.906698                             | 2.353256226                                 |
| 4.074826549                            | 103.0542927                                      | 683.1934509                          | 10620.18725                             | -39.07909088                                |
| 3.711031692                            | 83.77566458                                      | 646.1538086                          | 7018.361977                             | -15.10427494                                |
| 3.923306392                            | 92.80353706                                      | 543.9427643                          | 8612.496491                             | -52.65713577                                |
| 4.258533891                            | 121.6476819                                      | 751.9427185                          | 14798.15851                             | -35.99494324                                |
| 4.20008741                             | 116.1055546                                      | 839.0430298                          | 13480.49982                             | -73.0569397                                 |
| 4.054649896                            | 105.9351291                                      | 777.0077515                          | 11222.25158                             | -79.30882416                                |
| 3.980667967                            | 101.3928301                                      | 771.978302                           | 10280.506                               | -23.87456512                                |
| 3.931955305                            | 94.68497693                                      | 646.7187958                          | 8965.244856                             | -6.055978537                                |
| 4.012976486                            | 101.2439105                                      | 623.7646484                          | 10250.32942                             | -28.73882675                                |
| 4.10526074                             | 105.9870372                                      | 874.0828552                          | 11233.25205                             | -86.34967728                                |
| 4.088534929                            | 105.6565741                                      | 944.487854                           | 11163.31164                             | -44.65112305                                |
| 4.140323245                            | 108.7737916                                      | 747.3526306                          | 11831.73773                             | -60.18702048                                |
| 4.104803581                            | 112.3301511                                      | 613.4608002                          | 12618.06284                             | -54.91736755                                |
| 4.198140203                            | 115.5489016                                      | 581.3635864                          | 13351.54866                             | -153.1262253                                |
| 4.250616784                            | 120.8463095                                      | 778.9756775                          | 14603.83052                             | -20.28062668                                |
| 4.07204939                             | 105.3148465                                      | 648.9760284                          | 11091.21689                             | -43.04907227                                |
| 4.14654719                             | 109.3980567                                      | 717.9944153                          | 11967.93481                             | -83.04196014                                |
| 3.991572783                            | 101.9849559                                      | 777.5500183                          | 10400.93123                             | -26.76660042                                |
| 4.084445014                            | 105.4865134                                      | 905.8840637                          | 11127.40451                             | -50.35536423                                |
| 4.149807374                            | 110.7822923                                      | 813.7200623                          | 12272.71628                             | -48.71127739                                |
| 4.123218784                            | 107.1565094                                      | 825.75                               | 11482.51752                             | -1.742196107                                |
| 4.110860392                            | 113.2954182                                      | 882.8760986                          | 12835.85179                             | -27.09883118                                |
| 3.973385884                            | 108.1014127                                      | 556.8669128                          | 11685.91543                             | -4.439368725                                |
| 4.042543539                            | 102.9928165                                      | 581.6904602                          | 10607.52025                             | -78.53093567                                |
| 3.878761109                            | 91.08099496                                      | 682.5057068                          | 8295.747644                             | -25.78700981                                |
| 4.366777523                            | 127.5444856                                      | 898.3783569                          | 16267.5958                              | -52.189077                                  |
| 3.872303089                            | 91.89268072                                      | 701.1274414                          | 8444.264771                             | -26.83583832                                |
| 3.681371062                            | 81.57764455                                      | 576.9714661                          | 6654.912091                             | -32.92888794                                |
| 3.875690629                            | 97.46570446                                      | 562.3748779                          | 9499.563545                             | 7.140196562                                 |
| 3.849903333                            | 88.8043968                                       | 550.1537018                          | 7886.220891                             | -13.02785587                                |
| 3.833055677                            | 89.84481319                                      | 572.6788635                          | 8072.090457                             | -3.379171777                                |
| 3.820426577                            | 90.11494899                                      | 629.7636414                          | 8120.704032                             | 2.523724174                                 |
| 3.884036349                            | 98.86768003                                      | 618.8714294                          | 9774.818154                             | -6.394656992                                |
| 4.304185794                            | 125.5668637                                      | 897.1185303                          | 15767.03725                             | -106.5676949                                |
| 4.106617962                            | 104.7661065                                      | 659.9060516                          | 10975.93708                             | -64.94404144                                |
| 4.196303074                            | 114.1248685                                      | 864.1555481                          | 13024.48561                             | -45.58563042                                |
| 3.895910769                            | 102.3067492                                      | 741.7763062                          | 10466.67094                             | -114.794735                                 |
| 3.694008563                            | 89.40271879                                      | 418.0812149                          | 7992.846127                             | -14.03309526                                |
| 3.936359375                            | 103.2237888                                      | 667.5666046                          | 10655.15058                             | -0.698740113                                |
| 3.894421259                            | 96.14654855                                      | 754.616333                           | 9244.158798                             | -1.296383286                                |
| 3.501964759                            | 76.99969978                                      | 646.6330261                          | 5928.953766                             | -1.914124489                                |
| 3.986116118                            | 101.7094055                                      | 680.4029236                          | 10344.80317                             | 11.465098                                   |
| 4.011961277                            | 101.0207646                                      | 756.5637207                          | 10205.19488                             | -27.19605255                                |
| 4.135251118                            | 107.3435422                                      | 719.2892761                          | 11522.63605                             | -16.36723595                                |
| 4.304769899                            | 121.1463894                                      | 806.4481201                          | 14676.44767                             | -101.1883636                                |
| 4.229759501                            | 118.9351865                                      | 974.4899292                          | 14145.57858                             | -34.22902374                                |
| 3.752808423                            | 98.05130439                                      | 692.4993591                          | 9614.058292                             | -7.724707127                                |
| 3.982914875                            | 99.79854002                                      | 669.280304                           | 9959.74859                              | -45.42933922                                |
| 3.38742018                             | 64.23166791                                      | 423.2519684                          | 4125.707162                             | 7.693253994                                 |
| 4.095377329                            | 107.4316273                                      | 668.4174042                          | 11541.55454                             | 13.48608112                                 |
| 4.053145584                            | 106.1213229                                      | 983.1304932                          | 11261.73518                             | -28.49757385                                |
| 4.066732967                            | 103.2201746                                      | 744.7441101                          | 10654.40445                             | -25.66179466                                |
| 4.061957266                            | 103.7580241                                      | 657.6575012                          | 10765.72756                             | -33.14086533                                |
| 3.947592769                            | 97.3146235                                       | 513.5707703                          | 9470.135947                             | -8.459269905                                |
| 4.13795811                             | 117.8109842                                      | 713.1514282                          | 13879.428                               | -10.4826683                                 |
| 4.091116901                            | 117.222132                                       | 657.1029053                          | 13741.02824                             | -22.79799576                                |
| 4.187414171                            | 115.2937299                                      | 723.5607605                          | 13292.64416                             | -2.577205062                                |
| 3.85808468                             | 90.48080399                                      | 602.7335815                          | 8186.775891                             | -19.99770432                                |
| 4.203957678                            | 115.0597944                                      | 888.6820374                          | 13238.75629                             | -49.30955811                                |
| 4.473716467                            | 138.3074548                                      | 845.9853516                          | 19128.95205                             | -103.2174271                                |
| 3.790212611                            | 92.22675245                                      | 639.8046112                          | 8505.773868                             | 11.45674801                                 |
| 4.135693034                            | 109.9834273                                      | 818.5639648                          | 12096.35428                             | -6.010187626                                |
| 4.003358387                            | 98.71728491                                      | 815.4653931                          | 9745.102341                             | -43.62390137                                |
| 4.341263835                            | 125.2959773                                      | 975.3649597                          | 15699.08194                             | -40.37573242                                |
| 4.212745138                            | 118.6048839                                      | 914.7457581                          | 14067.11847                             | -44.55111694                                |
| 3.780459724                            | 87.04352626                                      | 699.2626648                          | 7576.575464                             | -30.13273506                                |
| 3.95616897                             | 98.18384051                                      | 626.4207916                          | 9640.066536                             | 0.041246772                                 |
| 4.04250568                             | 102.8006078                                      | 765.2911987                          | 10567.96496                             | -59.47485924                                |
| 4.031972082                            | 105.2666215                                      | 775.3762817                          | 11081.06161                             | -77.87787781                                |
| 4.134643764                            | 120.1879605                                      | 1029.588776                          | 14445.14586                             | -53.42317085                                |
| 4.292341293                            | 124.2208675                                      | 901.4597473                          | 15430.82392                             | -100.8642776                                |
| 4.17099874                             | 112.2030969                                      | 817.53302                            | 12589.53496                             | -21.30046902                                |
| 3.373176523                            | 73.62603827                                      | 388.6356277                          | 5420.793511                             | 0.908777046                                 |
| 4.198948632                            | 113.4912226                                      | 761.3805237                          | 12880.25761                             | -41.3631958                                 |
| 3.971606537                            | 98.91658755                                      | 573.6213684                          | 9784.491293                             | -20.19570408                                |
| 4.299194077                            | 122.7416236                                      | 772.6193237                          | 15065.50616                             | -56.54820938                                |
| 3.874328598                            | 92.03219064                                      | 647.9912567                          | 8469.924114                             | -7.348160219                                |
| 3.35264275                             | 69.06717442                                      | 291.0888672                          | 4770.274582                             | 17.31737518                                 |
| 3.892864108                            | 96.40174078                                      | 510.211731                           | 9293.295625                             | -25.08991051                                |
| 4.01974572                             | 102.0483806                                      | 773.9831238                          | 10413.87198                             | 3.293146849                                 |
| 4.127798268                            | 107.5167552                                      | 640.9240723                          | 11559.85265                             | -34.22112122                                |
| 3.867508903                            | 91.493641                                        | 603.2561951                          | 8371.086344                             | -76.08623581                                |
| 3.972886807                            | 99.15346046                                      | 773.7390137                          | 9831.408721                             | -40.91761246                                |
| 3.906443666                            | 91.5578227                                       | 638.796051                           | 8382.834897                             | 8.06710577                                  |
| 4.759240132                            | 179.1371403                                      | 1010.844757                          | 32090.11502                             | -236.2891983                                |
| 3.606876297                            | 80.43757868                                      | 607.3899536                          | 6470.204064                             | -6.542617702                                |
| 3.826742576                            | 95.09832648                                      | 436.2174759                          | 9043.691699                             | 12.88261347                                 |
| 3.546212814                            | 76.87126774                                      | 419.8508148                          | 5909.191805                             | -16.23858089                                |
| 4.583474179                            | 151.3369063                                      | 829.7836609                          | 22902.8592                              | -159.0326126                                |

| log.sigma.4.0.mm.3D_firstorder_Kurtosis | log.sigma.4.0.mm.3D_firstorder_Mean | log.sigma.4.0.mm.3D_glrIm_ShortRunLowGrayLevelEmphasis | log.sigma.4.0.mm.3D_glrIm_GrayLevelVariance |
|-----------------------------------------|-------------------------------------|--------------------------------------------------------|---------------------------------------------|
| 2.710681352                             | 131.8709259                         | 0.013936377                                            | 26.17642784                                 |
| 3.239570645                             | 101.3504138                         | 0.006609505                                            | 17.56099785                                 |
| 3.076278232                             | 27.7700482                          | 0.012670297                                            | 19.66743868                                 |
| 3.085793352                             | 102.5068693                         | 0.009654963                                            | 16.3014082                                  |
| 2.758368112                             | 74.80096688                         | 0.023313973                                            | 16.03529767                                 |
| 3.599195727                             | 62.7917716                          | 0.012350032                                            | 13.96196168                                 |
| 2.409668151                             | 72.69121828                         | 0.019382983                                            | 12.44229725                                 |
| 3.443262674                             | 119.6297515                         | 0.005654708                                            | 21.11285422                                 |
| 2.799293566                             | 123.8686401                         | 0.010819883                                            | 19.58396874                                 |
| 3.582011148                             | 100.9983978                         | 0.002427839                                            | 22.05632316                                 |
| 3.083690053                             | 87.53016938                         | 0.009022262                                            | 10.14999471                                 |
| 3.340851489                             | 89.36486218                         | 0.007124578                                            | 17.56799114                                 |
| 4.037118523                             | 74.65282906                         | 0.006976963                                            | 12.13234481                                 |
| 2.88098905                              | 70.68058431                         | 0.016267037                                            | 14.28591556                                 |
| 3.408971406                             | 100.7439868                         | 0.0076041                                              | 24.56710023                                 |
| 3.544907635                             | 56.97908005                         | 0.004000793                                            | 22.95515002                                 |
| 4.378260464                             | 54.81791807                         | 0.00526473                                             | 19.0444635                                  |
| 3.262565493                             | 133.9962879                         | 0.004323283                                            | 17.02492551                                 |
| 3.150881134                             | 102.9037883                         | 0.006036539                                            | 14.74268254                                 |
| 3.386558416                             | 84.83101215                         | 0.007732942                                            | 17.19754903                                 |
| 3.679912702                             | 46.5441205                          | 0.00385815                                             | 18.74057574                                 |
| 4.058758857                             | 81.33713818                         | 0.003809823                                            | 18.61183097                                 |
| 3.336391121                             | 71.94561076                         | 0.005414195                                            | 19.53404794                                 |
| 2.659582053                             | 75.84459841                         | 0.012846843                                            | 20.85726986                                 |
| 2.55807424                              | 20.98435152                         | 0.012054895                                            | 21.50966505                                 |
| 3.594481199                             | 114.6321745                         | 0.006654124                                            | 24.24401574                                 |
| 2.799214207                             | 78.62124203                         | 0.007784752                                            | 18.17153932                                 |
| 3.048918443                             | 64.93384156                         | 0.006081564                                            | 19.58014322                                 |
| 4.443136704                             | 79.94907167                         | 0.004872018                                            | 17.62130081                                 |
| 4.11109183                              | 76.32840635                         | 0.004357872                                            | 18.87919132                                 |
| 3.861877318                             | 84.91267734                         | 0.003480349                                            | 20.42685448                                 |
| 3.627025843                             | 118.9379662                         | 0.004785124                                            | 19.00410659                                 |
| 5.286666414                             | 88.73878022                         | 0.003429662                                            | 21.72508125                                 |
| 2.369490279                             | 110.1279408                         | 0.016893477                                            | 19.0960859                                  |
| 3.109551294                             | 56.17632166                         | 0.008109873                                            | 17.61116555                                 |
| 3.535039234                             | 77.94550834                         | 0.004699181                                            | 13.99115488                                 |
| 3.617892944                             | 101.3627716                         | 0.003670768                                            | 27.06719892                                 |
| 4.111152871                             | 80.9363071                          | 0.003542908                                            | 14.34796456                                 |
| 3.727786491                             | 55.63629112                         | 0.007530103                                            | 11.5263794                                  |
| 3.012469291                             | 107.862176                          | 0.013535703                                            | 16.02140982                                 |
| 2.907605207                             | 91.14846959                         | 0.011746305                                            | 13.12241359                                 |
| 2.756196718                             | 99.25289504                         | 0.008319362                                            | 13.38594516                                 |
| 3.162744017                             | 99.20572717                         | 0.005881607                                            | 13.57425463                                 |
| 3.399120733                             | 95.17472403                         | 0.009713426                                            | 16.45094223                                 |
| 3.898638518                             | 55.58602146                         | 0.003204218                                            | 26.85283786                                 |
| 2.882448833                             | 77.3890306                          | 0.010309467                                            | 17.83117389                                 |
| 4.005904602                             | 85.28311547                         | 0.005171811                                            | 21.78760073                                 |
| 4.749968526                             | 25.62441783                         | 0.004761572                                            | 17.91478612                                 |
| 2.367095232                             | 80.95911519                         | 0.024745109                                            | 13.10946433                                 |
| 3.498997061                             | 103.135585                          | 0.009140349                                            | 18.13741553                                 |
| 3.857274844                             | 95.84078835                         | 0.004452216                                            | 15.7543491                                  |
| 6.178378969                             | 69.33669483                         | 0.006164117                                            | 10.49574836                                 |
| 2.925709016                             | 124.0108916                         | 0.007295499                                            | 17.11181492                                 |
| 3.445171486                             | 86.30502491                         | 0.003689347                                            | 16.628579                                   |
| 2.963338317                             | 111.3409775                         | 0.004692933                                            | 18.92932035                                 |
| 3.20569769                              | 57.15468958                         | 0.004828668                                            | 24.22608743                                 |
| 4.469779125                             | 95.94454492                         | 0.002268507                                            | 23.78861352                                 |
| 4.224679684                             | 77.59294649                         | 0.006700814                                            | 16.87500858                                 |
| 3.926126374                             | 71.08846778                         | 0.004606051                                            | 16.51354459                                 |
| 3.388413426                             | 88.48853359                         | 0.011686504                                            | 6.924177297                                 |
| 2.615896025                             | 140.2522682                         | 0.00650989                                             | 19.0134969                                  |
| 4.619590302                             | 86.58846306                         | 0.00300624                                             | 19.22186616                                 |
| 3.720856428                             | 96.97632067                         | 0.004877133                                            | 17.85611293                                 |
| 2.603045009                             | 102.458149                          | 0.007894292                                            | 17.38765189                                 |
| 2.405674951                             | 116.4676277                         | 0.011844246                                            | 15.49305616                                 |
| 2.832615606                             | 122.2529581                         | 0.008721029                                            | 22.60017311                                 |
| 3.232871613                             | 99.89069499                         | 0.010026221                                            | 22.99037053                                 |
| 2.813321763                             | 127.5592515                         | 0.00599782                                             | 21.88714073                                 |
| 3.132031005                             | 84.2573193                          | 0.005442268                                            | 13.57716813                                 |
| 3.606384781                             | 81.45760092                         | 0.00316749                                             | 22.14284613                                 |
| 2.8525823                               | 91.6340893                          | 0.004068067                                            | 30.87831532                                 |
| 3.603010552                             | 106.6223942                         | 0.00627652                                             | 14.45904779                                 |
| 3.790798823                             | 113.5965076                         | 0.005492982                                            | 20.04749416                                 |
| 3.557187399                             | 88.09096544                         | 0.003377533                                            | 16.1701725                                  |
| 3.604898193                             | 103.406941                          | 0.004539731                                            | 26.04131091                                 |
| 4.048343428                             | 85.33820787                         | 0.005585212                                            | 23.58422433                                 |
| 4.347014693                             | 64.02104709                         | 0.005229457                                            | 13.008381                                   |
| 3.31863281                              | 105.1462057                         | 0.008891754                                            | 15.98463537                                 |
| 3.871429844                             | 72.34742564                         | 0.003958836                                            | 17.67838744                                 |
| 4.226250768                             | 50.94398486                         | 0.00342018                                             | 18.9170337                                  |
| 6.354864021                             | 66.34753774                         | 0.002637593                                            | 24.78105668                                 |
| 4.034713238                             | 57.21453634                         | 0.003646115                                            | 25.70050006                                 |
| 3.555418778                             | 104.8669257                         | 0.00445599                                             | 20.98253919                                 |
| 2.421543811                             | 76.73851148                         | 0.018299217                                            | 8.960374072                                 |
| 3.474021262                             | 101.2065254                         | 0.004236877                                            | 21.13713382                                 |
| 2.709842546                             | 94.64421247                         | 0.017165339                                            | 16.05512242                                 |
| 3.331743699                             | 95.44462612                         | 0.005876835                                            | 25.15939007                                 |
| 2.921077379                             | 98.47576881                         | 0.006024101                                            | 14.06639337                                 |
| 1.816138564                             | 105.8261301                         | 0.027187396                                            | 7.587052035                                 |
| 3.247904684                             | 84.91534559                         | 0.013244923                                            | 15.38063556                                 |
| 2.89048596                              | 118.6363009                         | 0.004017113                                            | 17.10016712                                 |
| 3.037048995                             | 100.4406807                         | 0.008109167                                            | 19.3393887                                  |
| 3.844985833                             | 39.31053939                         | 0.007491831                                            | 14.04585531                                 |
| 4.236245988                             | 72.48363779                         | 0.00331182                                             | 16.82378958                                 |
| 3.221355576                             | 116.7340232                         | 0.008013167                                            | 13.94527817                                 |
| 3.119971795                             | 22.70606634                         | 0.006814662                                            | 52.11417647                                 |
| 3.664127622                             | 78.34976239                         | 0.005501373                                            | 11.1170403                                  |
| 2.151911686                             | 121.2531248                         | 0.020784767                                            | 14.62548481                                 |
| 3.065585781                             | 70.37808471                         | 0.022661447                                            | 10.27590845                                 |
| 3.02598424                              | 55.00782178                         | 0.00791736                                             | 36.85011043                                 |

| log.sigma.4.0.mm.3D_glrIm_LowGrayLevelRunEmphasis | log.sigma.4.0.mm.3D_glrIm_GrayLevelNonUniformityNormalized | log.sigma.4.0.mm.3D_glrIm_RunVariance | log.sigma.4.0.mm.3D_glrIm_GrayLevelNonUniformity |
|---------------------------------------------------|------------------------------------------------------------|---------------------------------------|--------------------------------------------------|
| 0.01519684                                        | 0.057373224                                                | 0.152764615                           | 61.82946234                                      |
| 0.007151614                                       | 0.07225083                                                 | 0.173332513                           | 127.186365                                       |
| 0.013419922                                       | 0.067612094                                                | 0.131023869                           | 68.46242649                                      |
| 0.010433442                                       | 0.0729968                                                  | 0.180045749                           | 158.0113914                                      |
| 0.025501623                                       | 0.085981326                                                | 0.243568215                           | 69.58506347                                      |
| 0.013548544                                       | 0.08702368                                                 | 0.202972287                           | 123.1969052                                      |
| 0.023114177                                       | 0.102731976                                                | 0.36193348                            | 87.03299989                                      |
| 0.006047907                                       | 0.06714685                                                 | 0.19084613                            | 106.55029                                        |
| 0.011484086                                       | 0.066418539                                                | 0.177590458                           | 119.4603394                                      |
| 0.002576658                                       | 0.062320504                                                | 0.130769366                           | 168.9241279                                      |
| 0.010102751                                       | 0.095769671                                                | 0.256116656                           | 145.3393586                                      |
| 0.007532673                                       | 0.070074946                                                | 0.130216662                           | 106.8873262                                      |
| 0.007786687                                       | 0.092085965                                                | 0.275327793                           | 226.507751                                       |
| 0.017371981                                       | 0.075705067                                                | 0.153831233                           | 125.2911318                                      |
| 0.008101147                                       | 0.061596387                                                | 0.147012908                           | 85.34012708                                      |
| 0.004369023                                       | 0.063549969                                                | 0.297794737                           | 223.8968746                                      |
| 0.005593052                                       | 0.074044983                                                | 0.188579137                           | 104.314995                                       |
| 0.004776327                                       | 0.072741528                                                | 0.230185029                           | 160.1953286                                      |
| 0.006432527                                       | 0.075248321                                                | 0.143661486                           | 76.52745117                                      |
| 0.008493124                                       | 0.072913142                                                | 0.19235106                            | 184.8756105                                      |
| 0.004165422                                       | 0.069317826                                                | 0.16346454                            | 426.336514                                       |
| 0.004086068                                       | 0.070367591                                                | 0.171841375                           | 132.2260807                                      |
| 0.005820501                                       | 0.067929769                                                | 0.145675769                           | 250.31257                                        |
| 0.013869381                                       | 0.066554473                                                | 0.193647378                           | 60.61628098                                      |
| 0.012894312                                       | 0.061767082                                                | 0.136154395                           | 144.8314231                                      |
| 0.006926812                                       | 0.062421138                                                | 0.133788426                           | 76.28080323                                      |
| 0.008270913                                       | 0.068016498                                                | 0.14988839                            | 135.4271652                                      |
| 0.0064044                                         | 0.065940509                                                | 0.117567154                           | 202.3899349                                      |
| 0.005223428                                       | 0.077320205                                                | 0.217033783                           | 230.6108236                                      |
| 0.004646261                                       | 0.071493489                                                | 0.17118121                            | 200.4616693                                      |
| 0.003731293                                       | 0.067159747                                                | 0.162656123                           | 246.0020057                                      |
| 0.005143363                                       | 0.068133038                                                | 0.161111582                           | 303.6522971                                      |
| 0.003693576                                       | 0.070738238                                                | 0.178176947                           | 157.5557707                                      |
| 0.01802869                                        | 0.071226511                                                | 0.19809887                            | 30.0861172                                       |
| 0.008608277                                       | 0.070031624                                                | 0.156625159                           | 55.27107442                                      |
| 0.00510873                                        | 0.080581714                                                | 0.201892777                           | 225.867855                                       |
| 0.003889165                                       | 0.058271655                                                | 0.134551705                           | 187.991032                                       |
| 0.003845849                                       | 0.081788456                                                | 0.187774785                           | 241.7146215                                      |
| 0.008362595                                       | 0.093329305                                                | 0.297981556                           | 115.8767389                                      |
| 0.014999214                                       | 0.079882255                                                | 0.221414576                           | 112.4281406                                      |
| 0.012601339                                       | 0.079643122                                                | 0.153085486                           | 93.61006214                                      |
| 0.009164631                                       | 0.079500391                                                | 0.200071006                           | 133.5881553                                      |
| 0.006439039                                       | 0.080696713                                                | 0.249897847                           | 208.513295                                       |
| 0.010670778                                       | 0.081076161                                                | 0.228893732                           | 131.3707407                                      |
| 0.003429085                                       | 0.061107969                                                | 0.210193128                           | 187.1220944                                      |
| 0.011142731                                       | 0.066957132                                                | 0.152756849                           | 213.4431846                                      |
| 0.005563365                                       | 0.065914952                                                | 0.174046434                           | 214.932989                                       |
| 0.005080027                                       | 0.084888718                                                | 0.202310541                           | 111.8130312                                      |
| 0.027897172                                       | 0.086000359                                                | 0.227810741                           | 41.5272854                                       |
| 0.010092558                                       | 0.07671305                                                 | 0.222834465                           | 71.68379904                                      |
| 0.004912035                                       | 0.080827257                                                | 0.252566969                           | 273.3424779                                      |
| 0.006927676                                       | 0.109659299                                                | 0.353518376                           | 176.4684577                                      |
| 0.008058691                                       | 0.072213663                                                | 0.222151838                           | 236.676244                                       |
| 0.003896216                                       | 0.07195409                                                 | 0.130448705                           | 75.8928494                                       |
| 0.005023713                                       | 0.065409648                                                | 0.16229876                            | 230.6874033                                      |
| 0.005125413                                       | 0.059692054                                                | 0.133213679                           | 101.6250725                                      |
| 0.002419934                                       | 0.064131368                                                | 0.159084615                           | 187.7962183                                      |
| 0.007682621                                       | 0.091277429                                                | 0.359916929                           | 181.9862252                                      |
| 0.004885018                                       | 0.075227068                                                | 0.145915609                           | 92.17090809                                      |
| 0.01288681                                        | 0.109493942                                                | 0.221856612                           | 130.8365423                                      |
| 0.007181479                                       | 0.065048168                                                | 0.224597553                           | 164.9382891                                      |
| 0.003249773                                       | 0.073369448                                                | 0.212933008                           | 350.9856163                                      |
| 0.005227401                                       | 0.070771949                                                | 0.172861733                           | 141.8314077                                      |
| 0.0083046                                         | 0.066928722                                                | 0.127522963                           | 114.0168807                                      |
| 0.012499385                                       | 0.071999392                                                | 0.124280859                           | 38.56733194                                      |
| 0.009441063                                       | 0.065333477                                                | 0.144657115                           | 90.5094265                                       |
| 0.011000101                                       | 0.069355552                                                | 0.20233451                            | 63.63783813                                      |
| 0.006475903                                       | 0.063493627                                                | 0.170830887                           | 200.3701547                                      |
| 0.005870759                                       | 0.079160657                                                | 0.180853845                           | 89.41053226                                      |
| 0.003395499                                       | 0.064907946                                                | 0.167377212                           | 144.3142003                                      |
| 0.004315211                                       | 0.052089668                                                | 0.125583527                           | 180.7250135                                      |
| 0.006832051                                       | 0.087122376                                                | 0.239415456                           | 154.9067879                                      |
| 0.00600391                                        | 0.068453488                                                | 0.188044938                           | 282.2789442                                      |
| 0.003636493                                       | 0.074023068                                                | 0.174904342                           | 426.3982577                                      |
| 0.004848526                                       | 0.058762512                                                | 0.151183041                           | 224.1069793                                      |
| 0.005960578                                       | 0.064852814                                                | 0.168796385                           | 133.9985285                                      |
| 0.005683353                                       | 0.087559745                                                | 0.239665571                           | 176.8561805                                      |
| 0.009478538                                       | 0.075457162                                                | 0.163171064                           | 91.2119542                                       |
| 0.004234547                                       | 0.073946315                                                | 0.164880853                           | 215.8636974                                      |
| 0.003695533                                       | 0.075680508                                                | 0.199412992                           | 294.4759923                                      |
| 0.002775719                                       | 0.073388861                                                | 0.18052511                            | 88.30561145                                      |
| 0.003839908                                       | 0.063119849                                                | 0.130711996                           | 151.5400793                                      |
| 0.004749822                                       | 0.065996021                                                | 0.13944328                            | 146.5638378                                      |
| 0.021112059                                       | 0.106682418                                                | 0.334320208                           | 45.89715784                                      |
| 0.004526121                                       | 0.06417317                                                 | 0.136239366                           | 222.2170465                                      |
| 0.018923734                                       | 0.071576616                                                | 0.197189432                           | 215.9478454                                      |
| 0.006225934                                       | 0.060216612                                                | 0.140943383                           | 76.99237742                                      |
| 0.006597526                                       | 0.07855423                                                 | 0.203098851                           | 208.1798744                                      |
| 0.029725005                                       | 0.103843728                                                | 0.184767724                           | 37.80109799                                      |
| 0.01414097                                        | 0.079392985                                                | 0.182051233                           | 40.25098635                                      |
| 0.004365224                                       | 0.070242729                                                | 0.169719541                           | 199.7431851                                      |
| 0.008482306                                       | 0.065724228                                                | 0.133858557                           | 65.78875495                                      |
| 0.00796033                                        | 0.082015811                                                | 0.150113565                           | 113.9732758                                      |
| 0.00359622                                        | 0.078444663                                                | 0.20893327                            | 297.6813104                                      |
| 0.008780004                                       | 0.078188207                                                | 0.20063297                            | 320.6028659                                      |
| 0.007157036                                       | 0.044585437                                                | 0.08212443                            | 36.89364963                                      |
| 0.006079207                                       | 0.097839924                                                | 0.247685097                           | 146.0918727                                      |
| 0.022983465                                       | 0.076788814                                                | 0.201618593                           | 28.71311626                                      |
| 0.025506405                                       | 0.098777315                                                | 0.275995264                           | 73.42965106                                      |
| 0.008266338                                       | 0.049302879                                                | 0.075566377                           | 53.22643632                                      |

| log.sigma.4.0.mm.3D_glrIm_LongRunEmphasis | log.sigma.4.0.mm.3D_glrIm_ShortRunHighGrayLevelEmphasis | log.sigma.4.0.mm.3D_glrIm_RunLengthNonUniformity | log.sigma.4.0.mm.3D_glrIm_ShortRunEmphasis |
|-------------------------------------------|---------------------------------------------------------|--------------------------------------------------|--------------------------------------------|
| 1.403859812                               | 205.0498133                                             | 883.7416965                                      | 0.923247304                                |
| 1.469350711                               | 240.8197798                                             | 1397.84729                                       | 0.910627441                                |
| 1.355126945                               | 188.9844647                                             | 844.2847128                                      | 0.929458743                                |
| 1.475517595                               | 162.4313321                                             | 1732.663535                                      | 0.912765605                                |
| 1.635630257                               | 99.90843743                                             | 612.5606814                                      | 0.890337022                                |
| 1.552152115                               | 123.4341176                                             | 1087.01207                                       | 0.896817403                                |
| 1.946835908                               | 78.73292064                                             | 578.0334616                                      | 0.84913711                                 |
| 1.491872645                               | 295.3110107                                             | 1264.67164                                       | 0.911520996                                |
| 1.452864891                               | 188.0376701                                             | 1461.685359                                      | 0.91934063                                 |
| 1.362156083                               | 533.5182517                                             | 2244.352635                                      | 0.92691786                                 |
| 1.687807669                               | 137.0847392                                             | 1110.771701                                      | 0.877641783                                |
| 1.356045112                               | 227.1328452                                             | 1273.405205                                      | 0.929538321                                |
| 1.707015604                               | 174.5841124                                             | 1811.925485                                      | 0.880502008                                |
| 1.420514939                               | 130.2080184                                             | 1341.09282                                       | 0.918027297                                |
| 1.403875797                               | 218.1487806                                             | 1133.633876                                      | 0.920885495                                |
| 1.668653193                               | 346.2222695                                             | 2748.208708                                      | 0.902644923                                |
| 1.503946332                               | 330.963844                                              | 1118.959698                                      | 0.908380958                                |
| 1.589955291                               | 278.19247                                               | 1697.847048                                      | 0.898188442                                |
| 1.396869328                               | 240.3155209                                             | 832.9958872                                      | 0.921897111                                |
| 1.508713348                               | 219.6652558                                             | 1994.758445                                      | 0.906632126                                |
| 1.445825053                               | 324.4855226                                             | 4926.056487                                      | 0.913729519                                |
| 1.455017792                               | 338.962013                                              | 1511.777976                                      | 0.914850703                                |
| 1.401618767                               | 265.3695651                                             | 3002.535476                                      | 0.920458161                                |
| 1.492444255                               | 189.470295                                              | 734.3130319                                      | 0.914137358                                |
| 1.375535719                               | 183.6847945                                             | 1939.940779                                      | 0.925676139                                |
| 1.361210224                               | 330.4709593                                             | 1016.911911                                      | 0.929068035                                |
| 1.388285239                               | 189.0995801                                             | 1655.243142                                      | 0.928036335                                |
| 1.317067613                               | 258.223001                                              | 2611.362367                                      | 0.937151271                                |
| 1.534713758                               | 302.7651826                                             | 2389.562944                                      | 0.911854309                                |
| 1.447489027                               | 332.4029626                                             | 2270.334314                                      | 0.91777473                                 |
| 1.447209135                               | 376.1309426                                             | 2926.331173                                      | 0.912691192                                |
| 1.426067732                               | 293.9824905                                             | 3633.115016                                      | 0.92034994                                 |
| 1.477520973                               | 465.8256218                                             | 1769.87034                                       | 0.910589804                                |
| 1.503949275                               | 153.6053053                                             | 337.2727345                                      | 0.911777004                                |
| 1.433189927                               | 213.917585                                              | 639.6287957                                      | 0.916406292                                |
| 1.525808005                               | 264.338868                                              | 2198.288013                                      | 0.905623312                                |
| 1.363185932                               | 418.0086101                                             | 2687.914739                                      | 0.929051363                                |
| 1.511636841                               | 328.9312577                                             | 2304.818873                                      | 0.90328709                                 |
| 1.754927466                               | 179.9586878                                             | 913.4477775                                      | 0.878028576                                |
| 1.581653645                               | 124.5262544                                             | 1078.615073                                      | 0.895979461                                |
| 1.413996789                               | 148.5374002                                             | 960.9492758                                      | 0.920985309                                |
| 1.529637851                               | 157.2575282                                             | 1311.386745                                      | 0.903320711                                |
| 1.633631953                               | 230.0550427                                             | 1962.602158                                      | 0.892742974                                |
| 1.592671786                               | 156.4103971                                             | 1244.242763                                      | 0.896776735                                |
| 1.521055301                               | 452.259279                                              | 2436.371371                                      | 0.910911536                                |
| 1.415255984                               | 184.7556981                                             | 2589.628084                                      | 0.919324063                                |
| 1.457126035                               | 314.9799068                                             | 2623.609359                                      | 0.915544994                                |
| 1.539420582                               | 319.5679426                                             | 1021.289591                                      | 0.900439167                                |
| 1.621224259                               | 84.68426287                                             | 367.9416578                                      | 0.88886401                                 |
| 1.596488348                               | 165.5881535                                             | 711.1099348                                      | 0.892586041                                |
| 1.654062664                               | 286.4706351                                             | 2545.294592                                      | 0.888462345                                |
| 1.855719739                               | 242.6187855                                             | 1161.469433                                      | 0.871643418                                |
| 1.572626031                               | 183.7179524                                             | 2537.342574                                      | 0.900314916                                |
| 1.368135853                               | 383.0306498                                             | 870.0302745                                      | 0.924900771                                |
| 1.413480118                               | 284.9303242                                             | 2911.943324                                      | 0.925315006                                |
| 1.368727263                               | 316.727502                                              | 1409.850953                                      | 0.926494737                                |
| 1.421292983                               | 569.9095605                                             | 2392.399349                                      | 0.920968162                                |
| 1.875482773                               | 186.8868565                                             | 1421.247964                                      | 0.867118231                                |
| 1.40565461                                | 322.4775151                                             | 994.459146                                       | 0.918781125                                |
| 1.617103374                               | 112.4336079                                             | 890.6823393                                      | 0.884562711                                |
| 1.577175216                               | 228.2246315                                             | 1957.205718                                      | 0.899135148                                |
| 1.539967819                               | 416.8319683                                             | 3771.577754                                      | 0.906677291                                |
| 1.467365893                               | 291.6650304                                             | 1602.678553                                      | 0.912143678                                |
| 1.334704328                               | 213.0556352                                             | 1446.753331                                      | 0.936295296                                |
| 1.340957395                               | 152.764429                                              | 448.2821049                                      | 0.931147165                                |
| 1.390713296                               | 192.7815106                                             | 1139.251824                                      | 0.924117401                                |
| 1.539827026                               | 168.5440985                                             | 710.4659298                                      | 0.900764721                                |
| 1.453483862                               | 245.8096037                                             | 2536.886615                                      | 0.915171499                                |
| 1.499794166                               | 239.2690391                                             | 884.795854                                       | 0.904018862                                |
| 1.445324032                               | 418.4984807                                             | 1791.49545                                       | 0.916126891                                |
| 1.334642223                               | 409.0791513                                             | 2933.555972                                      | 0.934867118                                |
| 1.60062827                                | 213.3477621                                             | 1375.15297                                       | 0.899294324                                |
| 1.484950258                               | 287.5545262                                             | 3303.17429                                       | 0.913172004                                |
| 1.458630218                               | 343.6886421                                             | 4638.760754                                      | 0.915528056                                |
| 1.403951003                               | 347.1974887                                             | 3123.757025                                      | 0.922657063                                |
| 1.449210051                               | 317.0085167                                             | 1668.347626                                      | 0.916445589                                |
| 1.612351322                               | 242.2798405                                             | 1548.125355                                      | 0.895593121                                |
| 1.437815735                               | 214.6485441                                             | 983.2114267                                      | 0.917958435                                |
| 1.437274951                               | 325.4506959                                             | 2377.182107                                      | 0.918865175                                |
| 1.517415225                               | 361.9410065                                             | 3065.914256                                      | 0.907163225                                |
| 1.469980954                               | 647.4134662                                             | 964.3183052                                      | 0.914035114                                |
| 1.360297029                               | 421.6117319                                             | 1995.094814                                      | 0.928093786                                |
| 1.386059856                               | 345.2816004                                             | 1821.391422                                      | 0.923150557                                |
| 1.861272552                               | 76.25295414                                             | 308.2178059                                      | 0.863192535                                |
| 1.383691541                               | 334.9870881                                             | 2827.409213                                      | 0.921561196                                |
| 1.53071747                                | 112.2904276                                             | 2342.397715                                      | 0.901432109                                |
| 1.392246485                               | 301.607333                                              | 1044.496325                                      | 0.921779596                                |
| 1.532577149                               | 204.4178447                                             | 2076.185048                                      | 0.904342591                                |
| 1.50277391                                | 62.36104696                                             | 298.3437398                                      | 0.912400923                                |
| 1.493131477                               | 163.9692144                                             | 400.5514449                                      | 0.90728338                                 |
| 1.450519917                               | 292.5994432                                             | 2290.445372                                      | 0.915883524                                |
| 1.358523521                               | 242.045115                                              | 837.6368788                                      | 0.930348572                                |
| 1.41921731                                | 217.9979989                                             | 1120.288959                                      | 0.916353319                                |
| 1.534317786                               | 356.1557858                                             | 2981.354424                                      | 0.90575463                                 |
| 1.527821152                               | 170.8129197                                             | 3209.747668                                      | 0.904304528                                |
| 1.227940525                               | 564.0494127                                             | 730.8084354                                      | 0.951928616                                |
| 1.658311065                               | 228.639307                                              | 1112.742573                                      | 0.884463774                                |
| 1.534945446                               | 96.15224976                                             | 295.9984365                                      | 0.905347974                                |
| 1.721983673                               | 72.95106087                                             | 542.8866453                                      | 0.876873603                                |
| 1.21959851                                | 363.7210389                                             | 949.9850884                                      | 0.951019721                                |

| log.sigma.4.0.mm.3D_glrIm_LongRunHighGrayLevelEmphasis | log.sigma.4.0.mm.3D_glrIm_RunPercentage | log.sigma.4.0.mm.3D_glrIm_LongRunLowGrayLevelEmphasis | log.sigma.4.0.mm.3D_glrIm_RunEntropy |
|--------------------------------------------------------|-----------------------------------------|-------------------------------------------------------|--------------------------------------|
| 290.5617668                                            | 0.895453674                             | 0.021037713                                           | 4.823887977                          |
| 371.4601606                                            | 0.88                                    | 0.009924867                                           | 4.608996222                          |
| 278.0201997                                            | 0.905394248                             | 0.016834722                                           | 4.593640911                          |
| 251.6412346                                            | 0.881777415                             | 0.014580084                                           | 4.583325754                          |
| 159.9798009                                            | 0.851746778                             | 0.038624682                                           | 4.475774787                          |
| 204.9105845                                            | 0.863905325                             | 0.019692882                                           | 4.464829711                          |
| 144.301288                                             | 0.799869005                             | 0.046666761                                           | 4.380981921                          |
| 468.5045533                                            | 0.87892606                              | 0.008173491                                           | 4.748308263                          |
| 281.7516847                                            | 0.887101059                             | 0.015380388                                           | 4.665269532                          |
| 783.9237712                                            | 0.902533364                             | 0.003300676                                           | 4.73043111                           |
| 254.7470515                                            | 0.839640713                             | 0.016147219                                           | 4.359852784                          |
| 331.1697028                                            | 0.905090162                             | 0.00952506                                            | 4.562507517                          |
| 320.5622958                                            | 0.839246789                             | 0.012512298                                           | 4.494318259                          |
| 202.0175471                                            | 0.89057713                              | 0.022675108                                           | 4.468705044                          |
| 325.2345269                                            | 0.895050686                             | 0.010608891                                           | 4.783197471                          |
| 598.6108716                                            | 0.856862048                             | 0.006857017                                           | 4.882286825                          |
| 556.353913                                             | 0.876923077                             | 0.007298436                                           | 4.662804318                          |
| 462.7131419                                            | 0.860528057                             | 0.007434751                                           | 4.649244324                          |
| 355.7314375                                            | 0.895314193                             | 0.008445119                                           | 4.449712688                          |
| 352.7465097                                            | 0.873704028                             | 0.012299541                                           | 4.64075464                           |
| 513.0945669                                            | 0.884836746                             | 0.005726921                                           | 4.695130363                          |
| 538.5878305                                            | 0.885757807                             | 0.005533469                                           | 4.657884094                          |
| 400.8713991                                            | 0.894013776                             | 0.007797753                                           | 4.68601872                           |
| 297.1906867                                            | 0.883271098                             | 0.019028938                                           | 4.657759257                          |
| 275.3310664                                            | 0.900596715                             | 0.017246955                                           | 4.695748142                          |
| 468.8683212                                            | 0.903675467                             | 0.008308035                                           | 4.741766656                          |
| 282.2466568                                            | 0.900323557                             | 0.010875398                                           | 4.570035213                          |
| 370.9930031                                            | 0.91473117                              | 0.007959307                                           | 4.597068512                          |
| 501.6858576                                            | 0.876683187                             | 0.007255544                                           | 4.608625918                          |
| 522.047091                                             | 0.887160007                             | 0.00616546                                            | 4.664235619                          |
| 607.5340522                                            | 0.884262526                             | 0.004977309                                           | 4.736751831                          |
| 445.1604322                                            | 0.8912                                  | 0.007040625                                           | 4.67805156                           |
| 741.5605011                                            | 0.879524663                             | 0.005015778                                           | 4.717693398                          |
| 226.775422                                             | 0.877658724                             | 0.024455809                                           | 4.526485377                          |
| 336.7183128                                            | 0.888773389                             | 0.011093733                                           | 4.58500061                           |
| 438.1004852                                            | 0.87092609                              | 0.007330252                                           | 4.519666788                          |
| 609.537711                                             | 0.90376533                              | 0.004971815                                           | 4.871581705                          |
| 551.2884407                                            | 0.871265567                             | 0.005425443                                           | 4.521469252                          |
| 338.7471606                                            | 0.835268505                             | 0.013362454                                           | 4.458222502                          |
| 197.2294709                                            | 0.859789355                             | 0.023077748                                           | 4.556015802                          |
| 224.7550614                                            | 0.892974047                             | 0.016804808                                           | 4.386407863                          |
| 248.0046149                                            | 0.869485587                             | 0.013889632                                           | 4.466916196                          |
| 402.9307174                                            | 0.852964347                             | 0.009726827                                           | 4.523301909                          |
| 253.1390745                                            | 0.859382656                             | 0.016172923                                           | 4.572410406                          |
| 755.7085956                                            | 0.875787064                             | 0.004692053                                           | 4.927866523                          |
| 288.5293159                                            | 0.891511565                             | 0.01507609                                            | 4.646919149                          |
| 492.7244248                                            | 0.884448433                             | 0.007554794                                           | 4.783531193                          |
| 561.6889387                                            | 0.86817536                              | 0.006759673                                           | 4.553137826                          |
| 134.1994812                                            | 0.855291871                             | 0.044309868                                           | 4.339054506                          |
| 266.7316788                                            | 0.856669019                             | 0.015340493                                           | 4.625670676                          |
| 508.8400937                                            | 0.848103954                             | 0.007572176                                           | 4.638741046                          |
| 501.8584147                                            | 0.821260028                             | 0.011354231                                           | 4.354477657                          |
| 299.9816512                                            | 0.862745893                             | 0.012446868                                           | 4.657279215                          |
| 567.1090886                                            | 0.900742298                             | 0.004909801                                           | 4.505361195                          |
| 428.7463369                                            | 0.89562533                              | 0.006810832                                           | 4.661660288                          |
| 462.5995501                                            | 0.90160528                              | 0.006589209                                           | 4.806464371                          |
| 866.3160518                                            | 0.89260328                              | 0.003224963                                           | 4.782293468                          |
| 348.7488451                                            | 0.817750506                             | 0.014121947                                           | 4.633924479                          |
| 495.8465132                                            | 0.892913209                             | 0.006257967                                           | 4.518692026                          |
| 209.3636286                                            | 0.85026006                              | 0.019055366                                           | 4.095355335                          |
| 375.1253769                                            | 0.861977873                             | 0.010953047                                           | 4.755750894                          |
| 700.196066                                             | 0.871262144                             | 0.004627519                                           | 4.704675452                          |
| 466.141998                                             | 0.882058056                             | 0.007050078                                           | 4.656240034                          |
| 313.2234018                                            | 0.911834953                             | 0.010303234                                           | 4.506324229                          |
| 217.3481913                                            | 0.907822686                             | 0.015697762                                           | 4.391428387                          |
| 270.3059278                                            | 0.897502368                             | 0.013113103                                           | 4.651079939                          |
| 260.3276944                                            | 0.866802385                             | 0.0163006                                             | 4.732575824                          |
| 378.3599599                                            | 0.884766383                             | 0.008984497                                           | 4.767611808                          |
| 398.9051124                                            | 0.87357963                              | 0.008072175                                           | 4.462831317                          |
| 645.7207715                                            | 0.886471725                             | 0.00459517                                            | 4.781123065                          |
| 582.9437767                                            | 0.911017292                             | 0.005540883                                           | 4.928294444                          |
| 358.4266215                                            | 0.861530997                             | 0.010204853                                           | 4.469339855                          |
| 451.2690695                                            | 0.88097391                              | 0.008719444                                           | 4.731799615                          |
| 553.7171227                                            | 0.884644492                             | 0.005025164                                           | 4.587646427                          |
| 515.8223611                                            | 0.89475869                              | 0.006416081                                           | 4.885987013                          |
| 492.7735243                                            | 0.886050886                             | 0.007873234                                           | 4.786757044                          |
| 434.9639239                                            | 0.85696554                              | 0.008284856                                           | 4.476192295                          |
| 330.2904276                                            | 0.889568121                             | 0.012429034                                           | 4.494219821                          |
| 512.4228826                                            | 0.89039166                              | 0.005677676                                           | 4.603093167                          |
| 607.0006206                                            | 0.873430185                             | 0.005179078                                           | 4.680041163                          |
| 1035.360815                                            | 0.882808088                             | 0.003516927                                           | 4.733511467                          |
| 625.1572081                                            | 0.903419125                             | 0.004778195                                           | 4.804726981                          |
| 506.2257183                                            | 0.897332255                             | 0.006182873                                           | 4.701772874                          |
| 140.3287413                                            | 0.820267686                             | 0.039346185                                           | 4.159719168                          |
| 507.1587778                                            | 0.896645819                             | 0.00589854                                            | 4.730997871                          |
| 180.4706052                                            | 0.868274213                             | 0.027983936                                           | 4.610640955                          |
| 445.7405452                                            | 0.895173454                             | 0.007918856                                           | 4.828915729                          |
| 334.2032632                                            | 0.870471953                             | 0.009771132                                           | 4.508857746                          |
| 100.9183008                                            | 0.885457608                             | 0.044189971                                           | 3.83856822                           |
| 269.7141125                                            | 0.87663029                              | 0.018538521                                           | 4.459876768                          |
| 445.8674247                                            | 0.885370002                             | 0.006246035                                           | 4.592095582                          |
| 349.2110362                                            | 0.905673512                             | 0.010348873                                           | 4.602342594                          |
| 346.0899678                                            | 0.889490791                             | 0.01017703                                            | 4.426472113                          |
| 600.6993705                                            | 0.871370761                             | 0.005153681                                           | 4.625292704                          |
| 282.1718021                                            | 0.870966687                             | 0.012880381                                           | 4.545538749                          |
| 743.4673212                                            | 0.935607379                             | 0.008604339                                           | 5.090952118                          |
| 416.9792665                                            | 0.84624111                              | 0.009266293                                           | 4.345772303                          |
| 147.2893698                                            | 0.872933142                             | 0.035576608                                           | 4.381621393                          |
| 127.9587372                                            | 0.836105336                             | 0.041459258                                           | 4.319882825                          |
| 474.5542391                                            | 0.93547527                              | 0.009735426                                           | 4.921913175                          |

| log.sigma.4.0.mm.3D_glrIm_HighGrayLevelRunEmphasis | log.sigma.4.0.mm.3D_glrIm_RunLengthNonUniformityNormalized | log.sigma.4.0.mm.3D_glszm_GrayLevelVariance |
|----------------------------------------------------|------------------------------------------------------------|---------------------------------------------|
| 219.3290148                                        | 0.819140924                                                | 33.40196709                                 |
| 262.1448793                                        | 0.792833093                                                | 23.28584767                                 |
| 203.7186085                                        | 0.832524414                                                | 25.84193136                                 |
| 176.6310382                                        | 0.798340947                                                | 22.95902834                                 |
| 109.3344437                                        | 0.754282423                                                | 20.32970051                                 |
| 136.2953924                                        | 0.765718128                                                | 21.56958678                                 |
| 88.32130641                                        | 0.679159039                                                | 12.64051014                                 |
| 322.1299514                                        | 0.795313871                                                | 28.55082235                                 |
| 202.8891773                                        | 0.811534789                                                | 25.04391886                                 |
| 575.5690053                                        | 0.826760247                                                | 29.70939953                                 |
| 155.1434664                                        | 0.729068795                                                | 13.9777438                                  |
| 244.3447428                                        | 0.833145004                                                | 24.07967447                                 |
| 196.0659797                                        | 0.73441404                                                 | 23.03815361                                 |
| 141.9466602                                        | 0.808565583                                                | 18.65839677                                 |
| 235.9163577                                        | 0.81535113                                                 | 32.92694215                                 |
| 380.2594167                                        | 0.778451773                                                | 32.05385819                                 |
| 365.6137601                                        | 0.790829141                                                | 32.93050139                                 |
| 306.0095214                                        | 0.768903329                                                | 24.8169635                                  |
| 259.5709629                                        | 0.816992255                                                | 19.41967773                                 |
| 240.5987632                                        | 0.785168592                                                | 24.24595556                                 |
| 355.2006352                                        | 0.799398347                                                | 26.05250995                                 |
| 370.4469357                                        | 0.802255644                                                | 29.40440743                                 |
| 287.9321835                                        | 0.813346749                                                | 25.99755582                                 |
| 205.6692022                                        | 0.802697951                                                | 24.94108919                                 |
| 198.8683207                                        | 0.825021851                                                | 23.32807565                                 |
| 353.7290473                                        | 0.831379865                                                | 34.64203787                                 |
| 203.848221                                         | 0.829956507                                                | 22.34700232                                 |
| 276.7989704                                        | 0.84938549                                                 | 23.59285139                                 |
| 331.2284376                                        | 0.797933588                                                | 31.45187277                                 |
| 362.2162877                                        | 0.808306356                                                | 31.77032786                                 |
| 413.7370167                                        | 0.797201771                                                | 31.06907169                                 |
| 318.1932804                                        | 0.813542244                                                | 27.2067654                                  |
| 509.592512                                         | 0.793160549                                                | 37.56604702                                 |
| 165.3231254                                        | 0.796606494                                                | 22.37488386                                 |
| 233.747316                                         | 0.806920674                                                | 23.94246735                                 |
| 290.968704                                         | 0.783038849                                                | 23.03459984                                 |
| 449.5701039                                        | 0.831821975                                                | 39.09780084                                 |
| 364.4101511                                        | 0.778236235                                                | 24.52892411                                 |
| 202.4617714                                        | 0.731766424                                                | 23.18986318                                 |
| 136.026351                                         | 0.764548297                                                | 21.35443288                                 |
| 160.8992303                                        | 0.815492774                                                | 18.8304193                                  |
| 171.8714328                                        | 0.778687574                                                | 18.56425174                                 |
| 255.6870191                                        | 0.757881335                                                | 20.32453309                                 |
| 171.3617245                                        | 0.76597827                                                 | 25.80640943                                 |
| 497.064746                                         | 0.794289178                                                | 37.65403989                                 |
| 201.5625207                                        | 0.811039919                                                | 20.43197336                                 |
| 343.1760894                                        | 0.803325961                                                | 30.75428404                                 |
| 357.2171128                                        | 0.773152157                                                | 28.47718656                                 |
| 92.5082341                                         | 0.755591249                                                | 12.59322034                                 |
| 181.3700712                                        | 0.758483703                                                | 25.76561065                                 |
| 319.647819                                         | 0.750309215                                                | 28.58489277                                 |
| 276.7190202                                        | 0.719086671                                                | 24.33947528                                 |
| 201.5276716                                        | 0.772750063                                                | 24.96338356                                 |
| 414.4629223                                        | 0.822988606                                                | 22.24702788                                 |
| 307.1546776                                        | 0.824283588                                                | 25.7480151                                  |
| 341.1155445                                        | 0.826430476                                                | 32.58347774                                 |
| 617.3454074                                        | 0.815132486                                                | 37.21163912                                 |
| 209.1026643                                        | 0.710609028                                                | 26.94835855                                 |
| 351.6320194                                        | 0.809903213                                                | 24.08106328                                 |
| 127.860595                                         | 0.742448702                                                | 11.30556302                                 |
| 251.0024724                                        | 0.770227898                                                | 24.53761423                                 |
| 458.9578526                                        | 0.786262257                                                | 33.27276382                                 |
| 319.4412974                                        | 0.797223568                                                | 27.48071174                                 |
| 228.8167493                                        | 0.847826833                                                | 20.2803944                                  |
| 163.7992807                                        | 0.83578384                                                 | 19.32385247                                 |
| 205.6528336                                        | 0.821134053                                                | 24.82464344                                 |
| 183.4886883                                        | 0.773032567                                                | 30.05785667                                 |
| 267.0463943                                        | 0.80251869                                                 | 30.44521556                                 |
| 264.9056742                                        | 0.780598318                                                | 18.44367551                                 |
| 454.9300319                                        | 0.804498918                                                | 32.44844234                                 |
| 437.4958245                                        | 0.844246723                                                | 33.95661091                                 |
| 235.0369887                                        | 0.771396428                                                | 24.93277991                                 |
| 312.9616761                                        | 0.798994198                                                | 26.81681174                                 |
| 376.4360425                                        | 0.803524263                                                | 22.99059869                                 |
| 374.5863282                                        | 0.817947455                                                | 37.86297355                                 |
| 344.9514187                                        | 0.805707097                                                | 34.76914341                                 |
| 270.390651                                         | 0.764143716                                                | 23.5069287                                  |
| 232.9644335                                        | 0.809863293                                                | 22.82031716                                 |
| 354.6788201                                        | 0.811615494                                                | 26.95388784                                 |
| 399.1359637                                        | 0.786331955                                                | 31.33393426                                 |
| 707.7752213                                        | 0.800230021                                                | 48.20627724                                 |
| 455.3918503                                        | 0.829633974                                                | 38.27342783                                 |
| 372.2696157                                        | 0.818940468                                                | 31.50784663                                 |
| 85.71812475                                        | 0.709547795                                                | 10.69850416                                 |
| 364.0349163                                        | 0.815226462                                                | 28.30905931                                 |
| 123.2526041                                        | 0.774596641                                                | 19.10587873                                 |
| 325.7052195                                        | 0.815937263                                                | 36.49933769                                 |
| 224.5335016                                        | 0.781169737                                                | 20.15106011                                 |
| 68.19977979                                        | 0.806910884                                                | 6.69013366                                  |
| 180.9419395                                        | 0.787532944                                                | 20.66633136                                 |
| 317.2056277                                        | 0.804069665                                                | 22.98310337                                 |
| 259.6663104                                        | 0.83498845                                                 | 27.29136095                                 |
| 239.1305419                                        | 0.804650804                                                | 20.71690178                                 |
| 392.7187636                                        | 0.78374366                                                 | 29.20992477                                 |
| 188.0904256                                        | 0.780707889                                                | 19.58624441                                 |
| 595.3234319                                        | 0.882249892                                                | 60.58613092                                 |
| 256.9241116                                        | 0.742470559                                                | 18.5286965                                  |
| 104.5158465                                        | 0.786126286                                                | 15.02185726                                 |
| 81.28184826                                        | 0.728001148                                                | 14.21628891                                 |
| 383.9825804                                        | 0.879388009                                                | 38.27303792                                 |

| log.sigma.4.0.mm.3D_glszm_SmallAreaHighGrayLevelEmphasis | log.sigma.4.0.mm.3D_glszm_GrayLevelNonUniformityNormalized | log.sigma.4.0.mm.3D_glszm_SizeZoneNonUniformityNormalized |
|----------------------------------------------------------|------------------------------------------------------------|-----------------------------------------------------------|
| 145.4506404                                              | 0.050726871                                                | 0.331807095                                               |
| 143.0228028                                              | 0.060086474                                                | 0.26306566                                                |
| 104.3132683                                              | 0.055015385                                                | 0.292364497                                               |
| 98.95339332                                              | 0.058380196                                                | 0.288102014                                               |
| 77.6818998                                               | 0.064368152                                                | 0.295193572                                               |
| 66.97841902                                              | 0.063986777                                                | 0.209652893                                               |
| 37.20218213                                              | 0.08398307                                                 | 0.157384718                                               |
| 179.4522739                                              | 0.054349559                                                | 0.312360506                                               |
| 117.2690167                                              | 0.056409393                                                | 0.321929131                                               |
| 314.7688437                                              | 0.05271104                                                 | 0.289657925                                               |
| 59.25146235                                              | 0.075625672                                                | 0.194264864                                               |
| 132.7918169                                              | 0.058142284                                                | 0.301595729                                               |
| 120.0896509                                              | 0.059184587                                                | 0.275434307                                               |
| 64.90887226                                              | 0.065642982                                                | 0.24047359                                                |
| 137.8203448                                              | 0.051508264                                                | 0.346342975                                               |
| 221.0924617                                              | 0.050358469                                                | 0.317877458                                               |
| 177.62373                                                | 0.051284876                                                | 0.264209282                                               |
| 176.130113                                               | 0.057748568                                                | 0.268989952                                               |
| 162.2603981                                              | 0.067636719                                                | 0.348710938                                               |
| 121.2897287                                              | 0.05665                                                    | 0.250566667                                               |
| 178.1018425                                              | 0.055418265                                                | 0.272097243                                               |
| 207.5819457                                              | 0.05488561                                                 | 0.289602579                                               |
| 157.936774                                               | 0.055995948                                                | 0.277579601                                               |
| 116.3995416                                              | 0.056336962                                                | 0.260851792                                               |
| 102.373645                                               | 0.057234569                                                | 0.268345293                                               |
| 200.3766391                                              | 0.049005429                                                | 0.312511125                                               |
| 111.877111                                               | 0.06059493                                                 | 0.306450375                                               |
| 136.4027027                                              | 0.058071151                                                | 0.311286348                                               |
| 183.1360431                                              | 0.052009741                                                | 0.319092685                                               |
| 200.778863                                               | 0.050265473                                                | 0.317809777                                               |
| 201.1759664                                              | 0.051888052                                                | 0.283336894                                               |
| 173.3981305                                              | 0.054276543                                                | 0.286809308                                               |
| 276.509879                                               | 0.050327216                                                | 0.288405063                                               |
| 102.7173866                                              | 0.064208519                                                | 0.331605457                                               |
| 107.0697919                                              | 0.057588876                                                | 0.255186372                                               |
| 140.2807702                                              | 0.058492986                                                | 0.264840793                                               |
| 245.9377159                                              | 0.045235157                                                | 0.315089676                                               |
| 173.7959555                                              | 0.057261925                                                | 0.260095354                                               |
| 90.74100859                                              | 0.059036288                                                | 0.192004759                                               |
| 89.9091183                                               | 0.060957336                                                | 0.269594173                                               |
| 95.6333624                                               | 0.064301439                                                | 0.332506014                                               |
| 98.5206123                                               | 0.064197141                                                | 0.271724623                                               |
| 138.1086882                                              | 0.065382423                                                | 0.286884508                                               |
| 107.9148376                                              | 0.055426799                                                | 0.31007476                                                |
| 251.5939932                                              | 0.046446156                                                | 0.292599419                                               |
| 99.03692378                                              | 0.062126951                                                | 0.257719875                                               |
| 197.807116                                               | 0.051743285                                                | 0.301068717                                               |
| 144.6989942                                              | 0.055160266                                                | 0.267820358                                               |
| 59.74542844                                              | 0.082160299                                                | 0.276070095                                               |
| 121.9486991                                              | 0.058482553                                                | 0.334538567                                               |
| 171.7286592                                              | 0.054606547                                                | 0.274707889                                               |
| 142.1202464                                              | 0.061979307                                                | 0.246439129                                               |
| 126.8384002                                              | 0.056237694                                                | 0.28387538                                                |
| 212.0901384                                              | 0.061344513                                                | 0.298978077                                               |
| 162.2017656                                              | 0.055112913                                                | 0.285146173                                               |
| 192.6678804                                              | 0.049602237                                                | 0.285129175                                               |
| 350.742586                                               | 0.048312432                                                | 0.323783772                                               |
| 149.988523                                               | 0.054783544                                                | 0.290561114                                               |
| 168.1296712                                              | 0.05915493                                                 | 0.267716723                                               |
| 50.2550921                                               | 0.082026934                                                | 0.209292604                                               |
| 144.7238727                                              | 0.056190647                                                | 0.305376897                                               |
| 245.8878739                                              | 0.050870987                                                | 0.312012485                                               |
| 170.0213614                                              | 0.054946732                                                | 0.289079996                                               |
| 103.3835131                                              | 0.062183534                                                | 0.27353224                                                |
| 83.65290804                                              | 0.063359926                                                | 0.330442826                                               |
| 150.5290369                                              | 0.058274765                                                | 0.336874156                                               |
| 144.9168173                                              | 0.052523924                                                | 0.296332822                                               |
| 167.9286867                                              | 0.051785448                                                | 0.325233104                                               |
| 122.5789153                                              | 0.06638985                                                 | 0.298946559                                               |
| 267.4701914                                              | 0.050459976                                                | 0.308533739                                               |
| 245.6078598                                              | 0.04858139                                                 | 0.340100038                                               |
| 127.3482852                                              | 0.058327025                                                | 0.252599612                                               |
| 178.1244421                                              | 0.054505028                                                | 0.2890625                                                 |
| 181.2260811                                              | 0.058815361                                                | 0.268495976                                               |
| 211.682002                                               | 0.047052686                                                | 0.275469165                                               |
| 193.8117539                                              | 0.050486998                                                | 0.324601278                                               |
| 119.7951269                                              | 0.059054898                                                | 0.268581507                                               |
| 127.5614063                                              | 0.05923787                                                 | 0.281325444                                               |
| 184.5391059                                              | 0.055101262                                                | 0.284599352                                               |
| 207.1318587                                              | 0.051169992                                                | 0.299509774                                               |
| 411.7761727                                              | 0.044659696                                                | 0.350062997                                               |
| 242.1952105                                              | 0.046252096                                                | 0.319158665                                               |
| 226.1843195                                              | 0.050672213                                                | 0.309237827                                               |
| 45.32248571                                              | 0.093185596                                                | 0.27534626                                                |
| 179.3626454                                              | 0.054313985                                                | 0.275308494                                               |
| 67.73696938                                              | 0.063104887                                                | 0.285818713                                               |
| 200.0749578                                              | 0.046995976                                                | 0.314755505                                               |
| 121.2686211                                              | 0.063790962                                                | 0.275740198                                               |
| 33.40621674                                              | 0.1184573                                                  | 0.320885624                                               |
| 78.04745347                                              | 0.067692308                                                | 0.266627219                                               |
| 181.2346077                                              | 0.060126007                                                | 0.274726681                                               |
| 147.2156548                                              | 0.054011834                                                | 0.317017751                                               |
| 101.8278423                                              | 0.062139134                                                | 0.247214506                                               |
| 206.0882621                                              | 0.052278918                                                | 0.28007405                                                |
| 102.4687202                                              | 0.063004468                                                | 0.27313368                                                |
| 330.305427                                               | 0.036915405                                                | 0.383032798                                               |
| 143.3233211                                              | 0.071635735                                                | 0.251045057                                               |
| 49.57700799                                              | 0.073300326                                                | 0.23970535                                                |
| 45.34638541                                              | 0.075985918                                                | 0.259206519                                               |
| 218.6488017                                              | 0.045934114                                                | 0.357197972                                               |

| log.sigma.4.0.mm.3D_glszm_SizeZoneNonUniformity | log.sigma.4.0.mm.3D_glszm_GrayLevelNonUniformity | log.sigma.4.0.mm.3D_glszm_LargeAreaEmphasis | log.sigma.4.0.mm.3D_glszm_ZoneVariance |
|-------------------------------------------------|--------------------------------------------------|---------------------------------------------|----------------------------------------|
| 111.8189911                                     | 17.09495549                                      | 109.3976261                                 | 96.65463287                            |
| 120.2210066                                     | 27.4595186                                       | 178.8665208                                 | 159.7139273                            |
| 95.01846154                                     | 17.88                                            | 46.46153846                                 | 34.62793846                            |
| 156.1512915                                     | 31.64206642                                      | 204.3228782                                 | 183.8397387                            |
| 54.61081081                                     | 11.90810811                                      | 317.4                                       | 291.0858729                            |
| 57.65454545                                     | 17.59636364                                      | 227.8690909                                 | 192.3908231                            |
| 21.08955224                                     | 11.25373134                                      | 657.0820896                                 | 594.8606037                            |
| 121.1958763                                     | 21.08762887                                      | 231.5695876                                 | 209.9279081                            |
| 175.4513761                                     | 30.74311927                                      | 135.2458716                                 | 121.4129316                            |
| 244.7609467                                     | 44.5408284                                       | 66.75857988                                 | 54.1287574                             |
| 49.92607004                                     | 19.43579767                                      | 553.5525292                                 | 504.1157625                            |
| 148.0835031                                     | 28.54786151                                      | 51.33401222                                 | 39.55695389                            |
| 132.7593361                                     | 28.52697095                                      | 641.7738589                                 | 604.8468045                            |
| 103.1631702                                     | 28.16083916                                      | 117.6270396                                 | 98.86945844                            |
| 152.3909091                                     | 22.66363636                                      | 84.13636364                                 | 71.75876033                            |
| 320.7383548                                     | 50.81169475                                      | 225.6858276                                 | 209.1018023                            |
| 97.49322493                                     | 18.92411924                                      | 142.5718157                                 | 123.6528521                            |
| 126.6942675                                     | 27.19957537                                      | 331.5923567                                 | 302.0966187                            |
| 111.5875                                        | 21.64375                                         | 52.125                                      | 39.5225                                |
| 150.34                                          | 33.99                                            | 275.5616667                                 | 252.1844417                            |
| 454.4023952                                     | 92.54850299                                      | 140.1113772                                 | 122.7918247                            |
| 147.1181102                                     | 27.88188976                                      | 94.26574803                                 | 76.83347929                            |
| 289.7931034                                     | 58.45977011                                      | 155.1503831                                 | 139.5690637                            |
| 67.03891051                                     | 14.47859922                                      | 87.3463035                                  | 71.28398613                            |
| 198.3071719                                     | 42.29634641                                      | 51.0473613                                  | 38.63103598                            |
| 132.504717                                      | 20.77830189                                      | 48.93396226                                 | 38.76628693                            |
| 185.0960265                                     | 36.59933775                                      | 75.26655629                                 | 61.86659302                            |
| 334.0102516                                     | 62.31034483                                      | 45.04100652                                 | 35.26445699                            |
| 230.7040111                                     | 37.60304288                                      | 256.8506224                                 | 234.7489196                            |
| 242.4888598                                     | 38.3525557                                       | 200.4416776                                 | 183.3001242                            |
| 268.6033755                                     | 49.18987342                                      | 119.3797468                                 | 100.2898529                            |
| 350.7677841                                     | 66.38021259                                      | 199.3753066                                 | 182.6610489                            |
| 149.3938224                                     | 26.06949807                                      | 334.0752896                                 | 310.2013126                            |
| 47.41958042                                     | 9.181818182                                      | 70.27272727                                 | 58.95867769                            |
| 58.94805195                                     | 13.3030303                                       | 67.65367965                                 | 52.8761455                             |
| 157.0505902                                     | 34.68634064                                      | 381.3035413                                 | 351.8733737                            |
| 313.8293173                                     | 45.05421687                                      | 65.67570281                                 | 52.83542503                            |
| 169.8422665                                     | 37.39203675                                      | 198.3139357                                 | 171.3471479                            |
| 39.36097561                                     | 12.10243902                                      | 457.4634146                                 | 405.0599405                            |
| 83.57419355                                     | 18.89677419                                      | 341.6967742                                 | 313.8456191                            |
| 114.0495627                                     | 22.05539359                                      | 101.1020408                                 | 86.38150771                            |
| 110.320197                                      | 26.06403941                                      | 172.5960591                                 | 149.9515882                            |
| 138.5652174                                     | 31.57971014                                      | 559.4513458                                 | 520.1750447                            |
| 115.0377358                                     | 20.56334232                                      | 360.0916442                                 | 334.3038629                            |
| 260.4134831                                     | 41.33707865                                      | 146.2269663                                 | 130.8147254                            |
| 199.7329032                                     | 48.1483871                                       | 119.56                                      | 98.28112383                            |
| 282.1013874                                     | 48.48345784                                      | 127.0394877                                 | 111.5644584                            |
| 84.89905363                                     | 17.48580442                                      | 208.2397476                                 | 185.3690255                            |
| 32.57627119                                     | 9.694915254                                      | 163.2542373                                 | 140.4090779                            |
| 88.31818182                                     | 15.43939394                                      | 210.1666667                                 | 193.1197773                            |
| 175.5383412                                     | 34.89358372                                      | 957.9687011                                 | 919.096696                             |
| 60.13114754                                     | 15.12295082                                      | 1343.54918                                  | 1279.286617                            |
| 181.9641186                                     | 36.04836193                                      | 573.5709828                                 | 538.482456                             |
| 95.97196262                                     | 19.69158879                                      | 50.94392523                                 | 37.63620306                            |
| 264.0453564                                     | 51.03455724                                      | 166.0917927                                 | 148.0155211                            |
| 157.3913043                                     | 27.38043478                                      | 61.86956522                                 | 50.17118252                            |
| 282.3394495                                     | 42.12844037                                      | 113.3107798                                 | 99.17076503                            |
| 121.4545455                                     | 22.89952153                                      | 919.8851675                                 | 886.0339278                            |
| 95.03943662                                     | 21                                               | 59.74647887                                 | 44.80988693                            |
| 38.30054645                                     | 15.01092896                                      | 508.3879781                                 | 449.4425035                            |
| 182.6153846                                     | 33.60200669                                      | 266.5033445                                 | 242.3160283                            |
| 361.9344828                                     | 59.01034483                                      | 581.4508621                                 | 559.076331                             |
| 158.704918                                      | 30.16575592                                      | 118.9307832                                 | 101.8192242                            |
| 143.0573614                                     | 32.52198853                                      | 43.95028681                                 | 31.19323362                            |
| 61.46236559                                     | 11.78494624                                      | 35.65591398                                 | 25.59405712                            |
| 140.8133971                                     | 24.35885167                                      | 103.5909091                                 | 89.96456697                            |
| 69.34188034                                     | 12.29059829                                      | 154.1196581                                 | 133.6768939                            |
| 245.5509934                                     | 39.09801325                                      | 287.3324503                                 | 265.0240323                            |
| 76.23137255                                     | 16.92941176                                      | 125.7843137                                 | 100.0734487                            |
| 199.6213292                                     | 32.64760433                                      | 137.0370943                                 | 122.0229665                            |
| 419.0032468                                     | 59.85227273                                      | 38.88149351                                 | 29.3277745                             |
| 85.63126844                                     | 19.77286136                                      | 502.4867257                                 | 465.52463                              |
| 314.5                                           | 59.30147059                                      | 174.8023897                                 | 156.3076468                            |
| 357.3681443                                     | 78.28324568                                      | 276.8166792                                 | 252.8868676                            |
| 285.6615236                                     | 48.79363549                                      | 135.2092575                                 | 118.3177123                            |
| 191.1901528                                     | 29.73684211                                      | 194.4125637                                 | 178.7503207                            |
| 101.5238095                                     | 22.32275132                                      | 469.7698413                                 | 430.9549635                            |
| 91.43076923                                     | 19.25230769                                      | 97.64                                       | 80.15473609                            |
| 212.5957162                                     | 41.16064257                                      | 130.4712182                                 | 111.2382381                            |
| 294.4181078                                     | 50.30010173                                      | 430.5279756                                 | 410.0069834                            |
| 123.572238                                      | 15.76487252                                      | 159.7620397                                 | 144.8751214                            |
| 258.5185185                                     | 37.46419753                                      | 51.60123457                                 | 40.84121475                            |
| 196.0567823                                     | 32.12618297                                      | 75.36908517                                 | 60.14185632                            |
| 26.15789474                                     | 8.852631579                                      | 237.5894737                                 | 207.2815512                            |
| 271.7294833                                     | 53.60790274                                      | 59.20364742                                 | 43.89311711                            |
| 195.5                                           | 43.16374269                                      | 282.0643275                                 | 256.2686211                            |
| 126.2169576                                     | 18.84538653                                      | 58.06982544                                 | 45.38841176                            |
| 151.9328494                                     | 35.14882033                                      | 310.9274047                                 | 280.4273438                            |
| 31.76767677                                     | 11.72727273                                      | 75.82828283                                 | 58.59320478                            |
| 34.66153846                                     | 8.8                                              | 100.9384615                                 | 81.17017751                            |
| 191.2097701                                     | 41.84770115                                      | 220.4956897                                 | 199.2112544                            |
| 103.0307692                                     | 17.55384615                                      | 46.97538462                                 | 35.41538462                            |
| 88.5027933                                      | 22.24581006                                      | 97.6424581                                  | 78.60556787                            |
| 243.3843498                                     | 45.43037975                                      | 407.2278481                                 | 382.1357035                            |
| 248.5516484                                     | 57.33406593                                      | 236.3032967                                 | 209.5596232                            |
| 155.8943489                                     | 15.02457002                                      | 15.04176904                                 | 10.32422773                            |
| 68.03321033                                     | 19.41328413                                      | 650.8302583                                 | 608.5082719                            |
| 21.81318681                                     | 6.67032967                                       | 78.65934066                                 | 56.53834078                            |
| 41.21383648                                     | 12.08176101                                      | 309.1069182                                 | 277.915747                             |
| 180.0277778                                     | 23.15079365                                      | 11.73015873                                 | 6.487512598                            |

| log.sigma.4.0.mm.3D_glszm_ZonePercentage | log.sigma.4.0.mm.3D_glszm_LargeAreaLowGrayLevelEmphasis | log.sigma.4.0.mm.3D_glszm_LargeAreaHighGrayLevelEmphasis | log.sigma.4.0.mm.3D_glszm_HighGrayLevelZoneEmphasis |
|------------------------------------------|---------------------------------------------------------|----------------------------------------------------------|-----------------------------------------------------|
| 0.280133001                              | 1.003309024                                             | 15092.40059                                              | 252.652819                                          |
| 0.2285                                   | 1.049190084                                             | 33523.80525                                              | 281.0393873                                         |
| 0.290697674                              | 0.3040997                                               | 10328.97846                                              | 193.9630769                                         |
| 0.220953934                              | 1.757689468                                             | 26204.70111                                              | 189.1881919                                         |
| 0.194942044                              | 5.817264761                                             | 19705.92432                                              | 141.2108108                                         |
| 0.167887668                              | 2.201860976                                             | 27143.34182                                              | 143.3709091                                         |
| 0.126773888                              | 17.9033775                                              | 28059.85821                                              | 108.0671642                                         |
| 0.214958449                              | 0.965873564                                             | 59594.75                                                 | 324.3376289                                         |
| 0.268870252                              | 1.150847614                                             | 18802.75229                                              | 209.4055046                                         |
| 0.281385281                              | 0.130222202                                             | 36778.17515                                              | 572.7372781                                         |
| 0.142224682                              | 4.844458784                                             | 68863.50195                                              | 148.2490272                                         |
| 0.291394659                              | 0.261427962                                             | 12135.63747                                              | 241.98778                                           |
| 0.164561284                              | 4.182270413                                             | 102530.1743                                              | 222.0705394                                         |
| 0.230893434                              | 1.198862602                                             | 14783.95571                                              | 136.955711                                          |
| 0.284237726                              | 0.535376986                                             | 15354.55909                                              | 239.7636364                                         |
| 0.24555853                               | 0.779469943                                             | 70524.89594                                              | 386.0455897                                         |
| 0.229906542                              | 0.417946857                                             | 52495.53117                                              | 347.1517615                                         |
| 0.184128225                              | 1.635582746                                             | 72663.46709                                              | 338.1295117                                         |
| 0.281690141                              | 0.278106483                                             | 11394.025                                                | 273.921875                                          |
| 0.206825233                              | 1.526054748                                             | 54213.955                                                | 248.4466667                                         |
| 0.24028777                               | 0.444165125                                             | 48113.9509                                               | 340.7431138                                         |
| 0.239509665                              | 0.303851237                                             | 32237.22835                                              | 377.726378                                          |
| 0.253336569                              | 0.634335799                                             | 40750.04885                                              | 293.5268199                                         |
| 0.249514563                              | 0.690455209                                             | 14834.69261                                              | 220.2879377                                         |
| 0.283794163                              | 0.458508327                                             | 10440.67524                                              | 194.3748309                                         |
| 0.313609467                              | 0.197371671                                             | 14126.03302                                              | 363.8419811                                         |
| 0.273179557                              | 0.458877395                                             | 14713.02318                                              | 200.5960265                                         |
| 0.319821162                              | 0.17677655                                              | 13839.51538                                              | 251.6225536                                         |
| 0.21270962                               | 0.901404782                                             | 77173.72614                                              | 327.4536653                                         |
| 0.24153213                               | 0.600741012                                             | 70476.87156                                              | 352.5229358                                         |
| 0.22887494                               | 0.306775216                                             | 51150.55274                                              | 381.9989451                                         |
| 0.2446                                   | 0.833521908                                             | 51548.06132                                              | 325.5102208                                         |
| 0.204662189                              | 0.801566843                                             | 146352.5849                                              | 518.3436293                                         |
| 0.297297297                              | 0.893820689                                             | 7076.468531                                              | 179.4125874                                         |
| 0.260135135                              | 0.357195193                                             | 15197.76623                                              | 222.7402597                                         |
| 0.18433323                               | 1.562048908                                             | 97023.32884                                              | 282.391231                                          |
| 0.279069767                              | 0.179032516                                             | 27496.59337                                              | 445.1445783                                         |
| 0.192568564                              | 0.593446894                                             | 69286.98162                                              | 349.6324655                                         |
| 0.138140162                              | 2.884439257                                             | 76725.13171                                              | 218.6439024                                         |
| 0.189486553                              | 4.718715732                                             | 27855.07097                                              | 169.016129                                          |
| 0.260638298                              | 0.83387573                                              | 14245.00875                                              | 164.2332362                                         |
| 0.210144928                              | 1.522724624                                             | 21823.38916                                              | 190.7167488                                         |
| 0.159563925                              | 3.02466604                                              | 111987.588                                               | 260.5424431                                         |
| 0.196921444                              | 3.093439789                                             | 44949.52561                                              | 200.3881402                                         |
| 0.254722381                              | 0.327197446                                             | 69563.31236                                              | 466.2370787                                         |
| 0.216783217                              | 0.748000927                                             | 26347.31871                                              | 192.4309677                                         |
| 0.2542051                                | 0.466593427                                             | 38828.24013                                              | 352.3383138                                         |
| 0.209102902                              | 0.58178233                                              | 78614.61514                                              | 308.6435331                                         |
| 0.209219858                              | 3.966022497                                             | 8659.533898                                              | 112.5932203                                         |
| 0.242201835                              | 1.966833535                                             | 24287.41288                                              | 213.7878788                                         |
| 0.160391566                              | 3.860266573                                             | 244349.759                                               | 334.9170579                                         |
| 0.124744376                              | 5.508264109                                             | 337759.5615                                              | 283.3647541                                         |
| 0.168817487                              | 4.702590429                                             | 75525.63651                                              | 236.1872075                                         |
| 0.27412468                               | 0.144919817                                             | 20201.79128                                              | 400.3738318                                         |
| 0.23520447                               | 0.698265065                                             | 43516.92657                                              | 310.24946                                           |
| 0.292372881                              | 0.224777913                                             | 19446.00543                                              | 351.7753623                                         |
| 0.265934736                              | 0.218419297                                             | 61837.3922                                               | 617.3474771                                         |
| 0.171875                                 | 6.824302215                                             | 127324.6244                                              | 266.7535885                                         |
| 0.258746356                              | 0.197194898                                             | 20183.1493                                               | 336.2253521                                         |
| 0.13024911                               | 4.564807637                                             | 60654.48634                                              | 115.2786885                                         |
| 0.2033322                                | 1.730839662                                             | 47220.89799                                              | 264.6839465                                         |
| 0.211408784                              | 1.442133342                                             | 239519.9948                                              | 441.8353448                                         |
| 0.241743725                              | 0.438408525                                             | 35351.06193                                              | 323.6466302                                         |
| 0.279978587                              | 0.218466571                                             | 11635.96367                                              | 205.458891                                          |
| 0.315254237                              | 0.328589572                                             | 5301.172043                                              | 152.4408602                                         |
| 0.270900843                              | 1.013970648                                             | 12907.75837                                              | 247.6052632                                         |
| 0.221172023                              | 1.510377044                                             | 18146.38889                                              | 248.1880342                                         |
| 0.211721817                              | 1.606746709                                             | 57017.97881                                              | 288.7390728                                         |
| 0.197215777                              | 0.525082523                                             | 34448.75686                                              | 237.0196078                                         |
| 0.258077383                              | 0.357724877                                             | 55234.20711                                              | 470.6615147                                         |
| 0.323529412                              | 0.125074692                                             | 16541.87338                                              | 420.851461                                          |
| 0.164483261                              | 2.910423423                                             | 90463.43363                                              | 266.4188791                                         |
| 0.232528318                              | 0.806169709                                             | 43624.95956                                              | 331.1397059                                         |
| 0.204423284                              | 0.760280329                                             | 105236.402                                               | 349.7009767                                         |
| 0.243312999                              | 0.496412581                                             | 40811.24783                                              | 398.4966249                                         |
| 0.252681253                              | 0.741732257                                             | 55664.62139                                              | 340.336163                                          |
| 0.160509554                              | 1.961147888                                             | 118010.672                                               | 250.8941799                                         |
| 0.239146431                              | 0.597905076                                             | 18977.32308                                              | 241.1323077                                         |
| 0.228021978                              | 0.389690709                                             | 46908.78715                                              | 335.1044177                                         |
| 0.220750056                              | 1.097031921                                             | 173666.0814                                              | 375.4496439                                         |
| 0.25917768                               | 0.24406019                                              | 108485.4249                                              | 695.2096317                                         |
| 0.3048551                                | 0.122970839                                             | 24074.76667                                              | 429.8246914                                         |
| 0.256265158                              | 0.261316059                                             | 24436.86435                                              | 392.7476341                                         |
| 0.181644359                              | 5.348247313                                             | 12369.12632                                              | 95.72631579                                         |
| 0.255567064                              | 0.196835654                                             | 21161.49341                                              | 348.526849                                          |
| 0.196891192                              | 4.534439588                                             | 22682.00439                                              | 130.6491228                                         |
| 0.280812325                              | 0.232681586                                             | 16880.23441                                              | 342.5311721                                         |
| 0.181071311                              | 1.812804213                                             | 57687.2559                                               | 234.0217786                                         |
| 0.240875912                              | 2.432463932                                             | 4080.353535                                              | 63.92929293                                         |
| 0.224913495                              | 0.766514312                                             | 16203.32308                                              | 163.3769231                                         |
| 0.216754905                              | 0.999755082                                             | 51741.24282                                              | 345.7945402                                         |
| 0.294117647                              | 0.227186205                                             | 11664.33846                                              | 259.2676923                                         |
| 0.229193342                              | 0.435823023                                             | 24757.25419                                              | 214.4553073                                         |
| 0.199632437                              | 1.137571438                                             | 149194.3303                                              | 388.593786                                          |
| 0.193370166                              | 1.649831483                                             | 38908.16703                                              | 196.3593407                                         |
| 0.46040724                               | 0.054183908                                             | 9933.552826                                              | 551.3120393                                         |
| 0.153715258                              | 3.084662174                                             | 141262.2435                                              | 276.1845018                                         |
| 0.212616822                              | 1.872300537                                             | 5275.296703                                              | 114.8021978                                         |
| 0.179054054                              | 6.378348995                                             | 16946.33962                                              | 93.41509434                                         |
| 0.436741768                              | 0.064235213                                             | 4834.323413                                              | 363.2738095                                         |

| log.sigma.4.0.mm.3D_glszm_SmallAreaEmphasis | log.sigma.4.0.mm.3D_glszm_LowGrayLevelZoneEmphasis | log.sigma.4.0.mm.3D_glszm_ZoneEntropy | log.sigma.4.0.mm.3D_glszm_SmallAreaLowGrayLevelEmphasis |
|---------------------------------------------|----------------------------------------------------|---------------------------------------|---------------------------------------------------------|
| 0.596125237                                 | 0.017181862                                        | 6.313636194                           | 0.008043022                                             |
| 0.525935861                                 | 0.0092462                                          | 6.541234161                           | 0.004531406                                             |
| 0.556603844                                 | 0.018317341                                        | 6.313558261                           | 0.010040859                                             |
| 0.555156111                                 | 0.015312994                                        | 6.48917542                            | 0.010600881                                             |
| 0.560791978                                 | 0.030138764                                        | 5.884092175                           | 0.011502036                                             |
| 0.4620134                                   | 0.020990056                                        | 6.466424447                           | 0.012537584                                             |
| 0.370828412                                 | 0.028397589                                        | 5.897006304                           | 0.015019219                                             |
| 0.578420706                                 | 0.010966844                                        | 6.329793578                           | 0.008198108                                             |
| 0.585286776                                 | 0.017219507                                        | 6.355917016                           | 0.012044289                                             |
| 0.554007664                                 | 0.003619362                                        | 6.704044379                           | 0.002486056                                             |
| 0.433113486                                 | 0.015061364                                        | 6.268162355                           | 0.00641934                                              |
| 0.564319236                                 | 0.010521336                                        | 6.406659144                           | 0.007057269                                             |
| 0.535127153                                 | 0.01091899                                         | 6.495411574                           | 0.005901817                                             |
| 0.494370875                                 | 0.024087403                                        | 6.44822744                            | 0.011382155                                             |
| 0.611094917                                 | 0.011816286                                        | 6.382869832                           | 0.009020458                                             |
| 0.58242486                                  | 0.005853582                                        | 6.688970652                           | 0.003840736                                             |
| 0.524562759                                 | 0.009635311                                        | 6.610710791                           | 0.005661217                                             |
| 0.531633719                                 | 0.006953922                                        | 6.582179965                           | 0.004946367                                             |
| 0.613215625                                 | 0.009544275                                        | 6.065251086                           | 0.007600688                                             |
| 0.509675365                                 | 0.010006457                                        | 6.68876559                            | 0.004170552                                             |
| 0.534907323                                 | 0.00545078                                         | 6.899136962                           | 0.003259138                                             |
| 0.554925471                                 | 0.006029584                                        | 6.605218702                           | 0.004242445                                             |
| 0.541882159                                 | 0.007017425                                        | 6.804549267                           | 0.003443288                                             |
| 0.522097418                                 | 0.018183955                                        | 6.334961012                           | 0.009493448                                             |
| 0.524916715                                 | 0.015410542                                        | 6.573785725                           | 0.008810695                                             |
| 0.576296389                                 | 0.012909492                                        | 6.478991253                           | 0.011163769                                             |
| 0.572771856                                 | 0.0110637                                          | 6.429933255                           | 0.007521666                                             |
| 0.575552144                                 | 0.008608754                                        | 6.507521422                           | 0.005730747                                             |
| 0.585305734                                 | 0.009020066                                        | 6.629108937                           | 0.006662803                                             |
| 0.581969331                                 | 0.006924833                                        | 6.614983966                           | 0.004197909                                             |
| 0.548271206                                 | 0.005847523                                        | 6.875056054                           | 0.004063663                                             |
| 0.54989256                                  | 0.007103488                                        | 6.798619379                           | 0.004735372                                             |
| 0.553370384                                 | 0.005899976                                        | 6.686958977                           | 0.003979922                                             |
| 0.588134851                                 | 0.026832283                                        | 6.655448128                           | 0.017232136                                             |
| 0.505885231                                 | 0.013557234                                        | 6.271593991                           | 0.008918123                                             |
| 0.526798861                                 | 0.007393006                                        | 6.598671962                           | 0.003814061                                             |
| 0.581026618                                 | 0.005509383                                        | 6.830152527                           | 0.003771168                                             |
| 0.525739291                                 | 0.005936384                                        | 6.747323882                           | 0.003964385                                             |
| 0.43551936                                  | 0.015003163                                        | 6.495392047                           | 0.007493343                                             |
| 0.531731854                                 | 0.020251291                                        | 6.309617584                           | 0.013702962                                             |
| 0.597338551                                 | 0.016483073                                        | 6.054564318                           | 0.009625554                                             |
| 0.53217536                                  | 0.01196816                                         | 6.33882961                            | 0.008036225                                             |
| 0.552446412                                 | 0.011570962                                        | 6.333336506                           | 0.00753092                                              |
| 0.57515003                                  | 0.016378644                                        | 6.301711617                           | 0.011864861                                             |
| 0.554578044                                 | 0.005087164                                        | 6.829331755                           | 0.003269989                                             |
| 0.52051584                                  | 0.013064348                                        | 6.661064921                           | 0.005440328                                             |
| 0.566763827                                 | 0.006566966                                        | 6.753609172                           | 0.003106016                                             |
| 0.529631263                                 | 0.009949593                                        | 6.416421117                           | 0.007559478                                             |
| 0.540393861                                 | 0.026977532                                        | 5.483373876                           | 0.009843327                                             |
| 0.598379878                                 | 0.014306575                                        | 6.084234742                           | 0.011029032                                             |
| 0.537160656                                 | 0.007625452                                        | 6.731379352                           | 0.003914988                                             |
| 0.505812336                                 | 0.011214929                                        | 6.314913181                           | 0.0039298                                               |
| 0.549117236                                 | 0.010683806                                        | 6.632105895                           | 0.006817553                                             |
| 0.564785831                                 | 0.006492579                                        | 6.188884651                           | 0.005213886                                             |
| 0.54838385                                  | 0.006728079                                        | 6.705380162                           | 0.004282887                                             |
| 0.54523552                                  | 0.007155136                                        | 6.655722153                           | 0.004922358                                             |
| 0.588202774                                 | 0.003581279                                        | 6.727158689                           | 0.002685209                                             |
| 0.556575356                                 | 0.009956397                                        | 6.515357986                           | 0.006504725                                             |
| 0.530262867                                 | 0.008184228                                        | 6.403640692                           | 0.006127645                                             |
| 0.465806758                                 | 0.021071189                                        | 6.022459158                           | 0.009389118                                             |
| 0.571428207                                 | 0.008821921                                        | 6.488219752                           | 0.004464232                                             |
| 0.576777536                                 | 0.005053686                                        | 6.748713976                           | 0.003421311                                             |
| 0.551828638                                 | 0.00794259                                         | 6.58138147                            | 0.00554816                                              |
| 0.53679948                                  | 0.011457762                                        | 6.440689216                           | 0.006309911                                             |
| 0.595004951                                 | 0.018908428                                        | 5.826429197                           | 0.014597966                                             |
| 0.601446609                                 | 0.009879531                                        | 6.197740285                           | 0.005351743                                             |
| 0.562204414                                 | 0.013839739                                        | 6.26588399                            | 0.009898112                                             |
| 0.591190886                                 | 0.009533                                           | 6.591838832                           | 0.006910845                                             |
| 0.566915093                                 | 0.010655417                                        | 6.070692124                           | 0.008278711                                             |
| 0.571799397                                 | 0.004969815                                        | 6.619765135                           | 0.003584199                                             |
| 0.604299128                                 | 0.005296714                                        | 6.653798411                           | 0.003240044                                             |
| 0.512263072                                 | 0.012727756                                        | 6.389746788                           | 0.010066985                                             |
| 0.554777399                                 | 0.006155759                                        | 6.759811048                           | 0.002895421                                             |
| 0.533298007                                 | 0.005194428                                        | 6.832074515                           | 0.00333219                                              |
| 0.538410238                                 | 0.006409858                                        | 6.973205909                           | 0.003434943                                             |
| 0.589730819                                 | 0.008337755                                        | 6.52603501                            | 0.004115076                                             |
| 0.527706713                                 | 0.010747396                                        | 6.355664888                           | 0.00788626                                              |
| 0.542814067                                 | 0.015109453                                        | 6.272137161                           | 0.009047202                                             |
| 0.550685883                                 | 0.006201913                                        | 6.7316889                             | 0.003994862                                             |
| 0.563434518                                 | 0.00546285                                         | 6.734351161                           | 0.003576869                                             |
| 0.61283175                                  | 0.005393075                                        | 6.474172112                           | 0.004436166                                             |
| 0.583742381                                 | 0.005853625                                        | 6.760419515                           | 0.004265954                                             |
| 0.57632905                                  | 0.006529519                                        | 6.665967848                           | 0.003651459                                             |
| 0.536550397                                 | 0.031235992                                        | 5.355558277                           | 0.024452981                                             |
| 0.540192972                                 | 0.00639119                                         | 6.856017736                           | 0.004241792                                             |
| 0.551495714                                 | 0.024939038                                        | 6.448549735                           | 0.014056152                                             |
| 0.580846056                                 | 0.009596696                                        | 6.564749369                           | 0.006938494                                             |
| 0.541959541                                 | 0.009445618                                        | 6.469580405                           | 0.006434186                                             |
| 0.584938639                                 | 0.041289326                                        | 4.874201623                           | 0.032346806                                             |
| 0.529123932                                 | 0.022014358                                        | 5.81238719                            | 0.010065686                                             |
| 0.539675007                                 | 0.005589088                                        | 6.605019041                           | 0.003858436                                             |
| 0.582865581                                 | 0.014607293                                        | 6.298479215                           | 0.011486479                                             |
| 0.505914067                                 | 0.012529419                                        | 6.464954552                           | 0.00668099                                              |
| 0.544203875                                 | 0.005320366                                        | 6.806243185                           | 0.003511059                                             |
| 0.538914086                                 | 0.011209981                                        | 6.653027439                           | 0.006664542                                             |
| 0.63880709                                  | 0.007294815                                        | 6.450787955                           | 0.003805389                                             |
| 0.516088044                                 | 0.009011563                                        | 6.257152427                           | 0.003668367                                             |
| 0.49858664                                  | 0.030529015                                        | 5.576276443                           | 0.019989431                                             |
| 0.522822301                                 | 0.033988431                                        | 5.845076861                           | 0.020635818                                             |
| 0.618346008                                 | 0.008628182                                        | 6.391020124                           | 0.004162417                                             |

| log.sigma.4.0.mm.3D_ngtdm_Coarseness | log.sigma.4.0.mm.3D_ngtdm_Complexity | log.sigma.4.0.mm.3D_ngtdm_Strength | log.sigma.4.0.mm.3D_ngtdm_Busyness | log.sigma.4.0.mm.3D_ngtdm_Contrast |
|--------------------------------------|--------------------------------------|------------------------------------|------------------------------------|------------------------------------|
| 0.01098852                           | 0.420767905                          | 2.971195017                        | 0.247342825                        | 8.19E-05                           |
| 0.005784896                          | 0.241047048                          | 1.855479599                        | 0.340326227                        | 2.88E-05                           |
| 0.010649405                          | 0.426246105                          | 2.874498279                        | 0.213160486                        | 6.74E-05                           |
| 0.00503707                           | 0.143676937                          | 1.198707826                        | 0.583402519                        | 2.54E-05                           |
| 0.012703728                          | 0.181609979                          | 1.820104476                        | 0.492500515                        | 9.61E-05                           |
| 0.007644623                          | 0.144698949                          | 1.441317074                        | 0.49348734                         | 3.63E-05                           |
| 0.01279534                           | 0.104608037                          | 1.580947026                        | 0.564394714                        | 6.25E-05                           |
| 0.007216792                          | 0.325973698                          | 3.149217923                        | 0.206566158                        | 2.76E-05                           |
| 0.005718858                          | 0.232786058                          | 1.594040476                        | 0.463268779                        | 3.68E-05                           |
| 0.004203958                          | 0.249580699                          | 2.121957743                        | 0.251055034                        | 1.83E-05                           |
| 0.006709982                          | 0.090911612                          | 0.981537636                        | 0.602456033                        | 2.86E-05                           |
| 0.006873343                          | 0.280402198                          | 1.86312343                         | 0.30635935                         | 3.99E-05                           |
| 0.004228769                          | 0.100098171                          | 1.15208652                         | 0.55152723                         | 1.23E-05                           |
| 0.00645471                           | 0.144202592                          | 1.134971791                        | 0.568850148                        | 3.77E-05                           |
| 0.007270874                          | 0.432408688                          | 2.461156378                        | 0.304030811                        | 5.69E-05                           |
| 0.003610808                          | 0.159068301                          | 1.659417029                        | 0.3439238                          | 1.13E-05                           |
| 0.008536751                          | 0.32928242                           | 3.480710424                        | 0.154369514                        | 2.79E-05                           |
| 0.004572242                          | 0.211257862                          | 1.8582495                          | 0.358613565                        | 1.79E-05                           |
| 0.008878985                          | 0.415320842                          | 2.428242048                        | 0.239057369                        | 5.50E-05                           |
| 0.004462674                          | 0.113420833                          | 1.111979591                        | 0.535317675                        | 2.11E-05                           |
| 0.00187913                           | 0.102059015                          | 0.913621891                        | 0.636415362                        | 5.84E-06                           |
| 0.00586281                           | 0.330588522                          | 3.226686174                        | 0.203467136                        | 1.84E-05                           |
| 0.003010837                          | 0.131369115                          | 1.096613829                        | 0.571934869                        | 1.35E-05                           |
| 0.013312329                          | 0.28777813                           | 2.882884206                        | 0.225758304                        | 7.98E-05                           |
| 0.005083016                          | 0.129055018                          | 0.999385816                        | 0.589426669                        | 3.88E-05                           |
| 0.008099362                          | 0.486175456                          | 2.867262433                        | 0.207058871                        | 6.36E-05                           |
| 0.005916486                          | 0.16812777                           | 1.539002092                        | 0.460436769                        | 2.86E-05                           |
| 0.00322667                           | 0.168316218                          | 0.965387167                        | 0.575432294                        | 2.32E-05                           |
| 0.00342535                           | 0.173254544                          | 1.430873573                        | 0.399700405                        | 1.35E-05                           |
| 0.004116318                          | 0.215202756                          | 1.860049844                        | 0.301537722                        | 1.39E-05                           |
| 0.003405682                          | 0.130212863                          | 1.386981319                        | 0.380666222                        | 1.20E-05                           |
| 0.002331685                          | 0.141407989                          | 1.094929137                        | 0.595302688                        | 9.39E-06                           |
| 0.005429509                          | 0.282699425                          | 3.240633023                        | 0.178382387                        | 1.61E-05                           |
| 0.024185061                          | 0.612812626                          | 4.014187413                        | 0.168231354                        | 0.000228336                        |
| 0.012799626                          | 0.411422686                          | 2.727191555                        | 0.203623675                        | 9.44E-05                           |
| 0.003776382                          | 0.128453692                          | 1.135777821                        | 0.470825217                        | 1.36E-05                           |
| 0.003477495                          | 0.260466349                          | 1.817506522                        | 0.316682127                        | 1.79E-05                           |
| 0.003486497                          | 0.121778339                          | 1.165918195                        | 0.439542291                        | 1.30E-05                           |
| 0.009214059                          | 0.152825594                          | 2.08760308                         | 0.277634914                        | 2.44E-05                           |
| 0.007376167                          | 0.149501255                          | 1.462391341                        | 0.588516545                        | 4.34E-05                           |
| 0.007736278                          | 0.232373763                          | 1.371824604                        | 0.446261212                        | 5.55E-05                           |
| 0.006300224                          | 0.149728245                          | 1.237592936                        | 0.512408152                        | 2.98E-05                           |
| 0.004198604                          | 0.111238527                          | 1.0991548                          | 0.526247621                        | 1.53E-05                           |
| 0.006204991                          | 0.187125407                          | 1.564445935                        | 0.474250525                        | 3.30E-05                           |
| 0.003933181                          | 0.257194695                          | 1.973827492                        | 0.251721568                        | 1.71E-05                           |
| 0.003515764                          | 0.107650168                          | 0.913989944                        | 0.711823685                        | 1.82E-05                           |
| 0.003433081                          | 0.193604704                          | 1.671626596                        | 0.373032026                        | 1.33E-05                           |
| 0.008296999                          | 0.309679619                          | 3.21751378                         | 0.161743973                        | 3.16E-05                           |
| 0.020939071                          | 0.245415968                          | 2.284157281                        | 0.377318975                        | 0.00016613                         |
| 0.011449314                          | 0.361422428                          | 3.627141997                        | 0.223936694                        | 5.06E-05                           |
| 0.003413348                          | 0.112522283                          | 1.395825492                        | 0.431444799                        | 8.66E-06                           |
| 0.006293778                          | 0.149908819                          | 1.989763523                        | 0.27714297                         | 1.47E-05                           |
| 0.003517888                          | 0.102928484                          | 1.028928058                        | 0.707418303                        | 1.37E-05                           |
| 0.009966927                          | 0.358048812                          | 2.633814441                        | 0.186329483                        | 6.25E-05                           |
| 0.003125675                          | 0.136696896                          | 1.025630075                        | 0.571123772                        | 1.54E-05                           |
| 0.007347489                          | 0.344826813                          | 2.717781134                        | 0.207415311                        | 3.48E-05                           |
| 0.003786064                          | 0.274552504                          | 2.262712403                        | 0.233208982                        | 1.57E-05                           |
| 0.005006057                          | 0.167944615                          | 1.792867632                        | 0.414199681                        | 1.82E-05                           |
| 0.008718975                          | 0.34172901                           | 2.886244777                        | 0.190711015                        | 4.18E-05                           |
| 0.007902533                          | 0.082843073                          | 0.884701638                        | 0.615526362                        | 3.33E-05                           |
| 0.004404066                          | 0.132660176                          | 1.125789968                        | 0.567892802                        | 2.35E-05                           |
| 0.002328735                          | 0.164940292                          | 1.631802996                        | 0.379293201                        | 5.90E-06                           |
| 0.005182256                          | 0.249486257                          | 1.924062172                        | 0.29657403                         | 2.27E-05                           |
| 0.005757082                          | 0.193584059                          | 1.140729749                        | 0.499041716                        | 5.24E-05                           |
| 0.017677912                          | 0.452357157                          | 2.334652528                        | 0.243052393                        | 0.000198636                        |
| 0.007505735                          | 0.318722129                          | 2.233956186                        | 0.379066544                        | 5.80E-05                           |
| 0.01311253                           | 0.367771543                          | 3.928108689                        | 0.228885293                        | 6.72E-05                           |
| 0.00359346                           | 0.145244354                          | 1.145270551                        | 0.573844419                        | 1.94E-05                           |
| 0.009465512                          | 0.228675835                          | 2.093657581                        | 0.257478632                        | 4.45E-05                           |
| 0.005103548                          | 0.293008948                          | 2.539135136                        | 0.221601583                        | 2.00E-05                           |
| 0.003338183                          | 0.226293422                          | 1.487502645                        | 0.381034816                        | 2.30E-05                           |
| 0.005728636                          | 0.165115084                          | 1.506196384                        | 0.399114596                        | 2.45E-05                           |
| 0.002660538                          | 0.130926981                          | 1.175514084                        | 0.552726272                        | 1.05E-05                           |
| 0.001868168                          | 0.092290779                          | 0.812197907                        | 0.685101392                        | 6.42E-06                           |
| 0.003113046                          | 0.225296814                          | 1.91811946                         | 0.361014641                        | 1.18E-05                           |
| 0.00544021                           | 0.363276314                          | 3.016400385                        | 0.219848595                        | 2.11E-05                           |
| 0.005154881                          | 0.155460353                          | 1.549133738                        | 0.355961827                        | 1.73E-05                           |
| 0.007404773                          | 0.307710689                          | 1.892287329                        | 0.323611204                        | 5.22E-05                           |
| 0.003433018                          | 0.166315775                          | 1.225486666                        | 0.434080758                        | 1.72E-05                           |
| 0.003091197                          | 0.111029278                          | 1.192262595                        | 0.423423455                        | 1.06E-05                           |
| 0.009497972                          | 0.743362677                          | 6.877320361                        | 0.073275301                        | 3.21E-05                           |
| 0.004719748                          | 0.330989023                          | 2.544764084                        | 0.218236023                        | 2.17E-05                           |
| 0.005027395                          | 0.282675345                          | 2.25989246                         | 0.262132104                        | 2.09E-05                           |
| 0.02043711                           | 0.201614358                          | 1.741898005                        | 0.404110516                        | 0.000144462                        |
| 0.003248346                          | 0.134389049                          | 1.128882721                        | 0.49243549                         | 1.70E-05                           |
| 0.003668115                          | 0.084315191                          | 0.775597012                        | 1.21725522                         | 2.01E-05                           |
| 0.009277129                          | 0.420761553                          | 3.340444299                        | 0.176758471                        | 5.02E-05                           |
| 0.003894896                          | 0.105570602                          | 0.932136393                        | 0.661714869                        | 1.81E-05                           |
| 0.018837902                          | 0.211048089                          | 1.086060417                        | 0.651041896                        | 0.000315467                        |
| 0.020795957                          | 0.402831147                          | 3.475710715                        | 0.168541631                        | 0.00013805                         |
| 0.003727047                          | 0.144492365                          | 1.120871604                        | 0.526759915                        | 1.90E-05                           |
| 0.010111665                          | 0.415347611                          | 2.518496757                        | 0.227745804                        | 7.64E-05                           |
| 0.007489104                          | 0.206431762                          | 1.776870597                        | 0.296454066                        | 3.62E-05                           |
| 0.002851935                          | 0.117818601                          | 1.180713013                        | 0.460820704                        | 9.72E-06                           |
| 0.0026361                            | 0.070708717                          | 0.648636335                        | 0.975061765                        | 1.05E-05                           |
| 0.012066337                          | 1.867912172                          | 7.273298019                        | 0.075854373                        | 0.000177514                        |
| 0.006536611                          | 0.1363232949                         | 1.506725335                        | 0.361235766                        | 2.43E-05                           |
| 0.030700858                          | 0.349285787                          | 3.637747267                        | 0.250520743                        | 0.000217841                        |
| 0.013308555                          | 0.13758669                           | 1.612109655                        | 0.536297577                        | 6.73E-05                           |
| 0.009933819                          | 0.773909976                          | 3.915675248                        | 0.152046651                        | 0.000114223                        |

| log.sigma.3.5.mm.3D_gldm_GrayLevelVariance | log.sigma.3.5.mm.3D_gldm_HighGrayLevelEmphasis | log.sigma.3.5.mm.3D_gldm_GrayLevelNonUniformityNormalized | log.sigma.3.5.mm.3D_gldm_DependenceEntropy |
|--------------------------------------------|------------------------------------------------|-----------------------------------------------------------|--------------------------------------------|
| 23.90296633                                | 221.4655029                                    | 0.064328649                                               | 6.8820456                                  |
| 16.782279                                  | 211.078                                        | 0.077179                                                  | 6.792118232                                |
| 19.41437479                                | 202.0509839                                    | 0.068844186                                               | 6.564855847                                |
| 15.4463812                                 | 206.580106                                     | 0.079770372                                               | 6.762880106                                |
| 13.79768621                                | 116.4920969                                    | 0.103025646                                               | 6.57275892                                 |
| 12.60661584                                | 146.2362637                                    | 0.092143103                                               | 6.684025299                                |
| 10.48886148                                | 91.19962157                                    | 0.126993177                                               | 6.566018417                                |
| 18.61675279                                | 324.7795014                                    | 0.075702611                                               | 6.777746494                                |
| 17.70223298                                | 266.6941293                                    | 0.071283115                                               | 6.854994976                                |
| 19.9621147                                 | 458.3366633                                    | 0.066588201                                               | 6.807004134                                |
| 9.585490111                                | 217.6026563                                    | 0.100776694                                               | 6.638376376                                |
| 17.54024214                                | 229.1952522                                    | 0.071390256                                               | 6.669754052                                |
| 10.95852415                                | 236.994196                                     | 0.10209288                                                | 6.809941181                                |
| 13.79322419                                | 155.0678149                                    | 0.078321308                                               | 6.691297191                                |
| 21.75775528                                | 215.629199                                     | 0.064800626                                               | 6.877455338                                |
| 19.98783739                                | 394.5125335                                    | 0.075227076                                               | 7.206968309                                |
| 16.86230374                                | 352.9277259                                    | 0.082740268                                               | 6.817321289                                |
| 15.22289452                                | 306.5402658                                    | 0.08020859                                                | 6.836638985                                |
| 14.86718595                                | 275.2235915                                    | 0.076899115                                               | 6.594934732                                |
| 15.43651567                                | 250.5687694                                    | 0.078964201                                               | 6.856809678                                |
| 18.1683677                                 | 309.4378417                                    | 0.071134952                                               | 6.939230246                                |
| 16.99324663                                | 389.0957096                                    | 0.07502199                                                | 6.788186053                                |
| 18.09881702                                | 272.7107498                                    | 0.070567764                                               | 6.828868915                                |
| 19.10612122                                | 248.3786408                                    | 0.076474691                                               | 6.766629422                                |
| 20.90195988                                | 223.844086                                     | 0.062115533                                               | 6.835802933                                |
| 23.37739181                                | 448.066568                                     | 0.063738577                                               | 6.772345969                                |
| 16.38057318                                | 190.1886024                                    | 0.073880628                                               | 6.667240954                                |
| 19.88029486                                | 302.0602086                                    | 0.066636401                                               | 6.629073304                                |
| 15.84995639                                | 309.308326                                     | 0.086057448                                               | 6.841070923                                |
| 17.23116385                                | 345.5302311                                    | 0.077713114                                               | 6.829227581                                |
| 18.82368069                                | 434.0799131                                    | 0.071534056                                               | 6.931811179                                |
| 17.33580316                                | 291.8278                                       | 0.07179288                                                | 6.92297438                                 |
| 18.86234524                                | 394.4654287                                    | 0.079604762                                               | 6.818593453                                |
| 18.22851734                                | 172.7422037                                    | 0.088290593                                               | 6.469348544                                |
| 18.51776946                                | 290.2477477                                    | 0.072290196                                               | 6.593634962                                |
| 13.37501842                                | 304.1321107                                    | 0.087651097                                               | 6.7821183                                  |
| 25.18373127                                | 420.3121322                                    | 0.06189463                                                | 7.038464329                                |
| 13.95861458                                | 463.846358                                     | 0.087165612                                               | 6.756548655                                |
| 10.24519357                                | 187.921159                                     | 0.102808211                                               | 6.720956454                                |
| 14.68236493                                | 163.3404645                                    | 0.088340128                                               | 6.739062332                                |
| 12.95521741                                | 199.4354103                                    | 0.082040308                                               | 6.476232161                                |
| 13.32759448                                | 180.6495859                                    | 0.083414777                                               | 6.783681954                                |
| 12.77346847                                | 295.395441                                     | 0.087339154                                               | 6.8803715                                  |
| 14.80403842                                | 155.0705945                                    | 0.092372465                                               | 6.714720377                                |
| 23.96061578                                | 525.1104751                                    | 0.067442462                                               | 7.151753641                                |
| 17.34936625                                | 249.0360839                                    | 0.069178855                                               | 6.853816276                                |
| 20.37953797                                | 358.2270754                                    | 0.070267343                                               | 7.012636434                                |
| 17.28714295                                | 391.7453826                                    | 0.089060575                                               | 6.715316933                                |
| 12.14019353                                | 101.2819149                                    | 0.103258136                                               | 6.31974162                                 |
| 15.71165727                                | 158.612844                                     | 0.0936773                                                 | 6.597014605                                |
| 13.51216305                                | 292.5715361                                    | 0.09161067                                                | 6.867331542                                |
| 9.59705625                                 | 322.2684049                                    | 0.123079424                                               | 6.592369327                                |
| 15.24418173                                | 228.5949434                                    | 0.081263509                                               | 6.898662121                                |
| 16.04674014                                | 396.146883                                     | 0.073707685                                               | 6.539058531                                |
| 17.63320198                                | 280.5803912                                    | 0.070044721                                               | 6.83433077                                 |
| 22.58286838                                | 325.4682203                                    | 0.063773094                                               | 6.872104284                                |
| 22.49036049                                | 688.8670326                                    | 0.068861416                                               | 6.92414497                                 |
| 14.51030125                                | 214.5838816                                    | 0.108249654                                               | 6.88101647                                 |
| 17.03585878                                | 376.3206997                                    | 0.075038887                                               | 6.569662585                                |
| 6.341047352                                | 116.7480427                                    | 0.115639366                                               | 6.222159725                                |
| 17.56863701                                | 316.0204012                                    | 0.072191037                                               | 7.041790289                                |
| 17.80096906                                | 474.211591                                     | 0.081509457                                               | 6.957482839                                |
| 17.40804519                                | 333.5931308                                    | 0.07386512                                                | 6.894527733                                |
| 16.35095305                                | 271.8715203                                    | 0.069837887                                               | 6.475346252                                |
| 14.51726803                                | 127.5610169                                    | 0.073720195                                               | 6.419636079                                |
| 22.16510581                                | 237.7200259                                    | 0.07000486                                                | 6.736067601                                |
| 20.53514049                                | 186.915879                                     | 0.076670324                                               | 6.763497948                                |
| 19.92967553                                | 336.6918116                                    | 0.069121846                                               | 6.980824052                                |
| 12.76062731                                | 280.3727765                                    | 0.08442449                                                | 6.69327446                                 |
| 20.74801549                                | 513.651775                                     | 0.070219818                                               | 6.924237505                                |
| 28.22076416                                | 494.8511029                                    | 0.053953061                                               | 7.110207256                                |
| 13.29760264                                | 274.9961184                                    | 0.09513784                                                | 6.57411573                                 |
| 18.41527159                                | 287.6725796                                    | 0.072938748                                               | 7.002956207                                |
| 15.24928901                                | 393.3609277                                    | 0.077190519                                               | 6.818696228                                |
| 24.66097062                                | 423.6105115                                    | 0.062908362                                               | 7.028503071                                |
| 17.76117136                                | 395.7048477                                    | 0.07051637                                                | 6.909591604                                |
| 11.83737434                                | 256.2318471                                    | 0.09540076                                                | 6.729579649                                |
| 15.1491872                                 | 248.615894                                     | 0.07664327                                                | 6.595168915                                |
| 16.99448118                                | 376.4996947                                    | 0.077287588                                               | 6.833167978                                |
| 17.45080068                                | 349.0783741                                    | 0.082752217                                               | 6.912741064                                |
| 22.98144734                                | 692.8105727                                    | 0.07851458                                                | 6.769641424                                |
| 25.31378713                                | 486.5366955                                    | 0.066317036                                               | 6.879096813                                |
| 19.56940851                                | 339.8694422                                    | 0.069864832                                               | 6.840988175                                |
| 8.864917431                                | 77.34608031                                    | 0.121482548                                               | 6.233826654                                |
| 20.27380067                                | 458.2881926                                    | 0.066100777                                               | 6.898281699                                |
| 14.11293907                                | 150.7820956                                    | 0.078164829                                               | 6.892697562                                |
| 23.37841166                                | 307.7542017                                    | 0.066622728                                               | 6.854350378                                |
| 13.55981744                                | 296.9559645                                    | 0.084173187                                               | 6.734360356                                |
| 8.172838191                                | 59.97080292                                    | 0.103853281                                               | 6.065867655                                |
| 14.36961962                                | 221.9688581                                    | 0.09608362                                                | 6.392121836                                |
| 16.08477089                                | 321.3491124                                    | 0.075609273                                               | 6.867330844                                |
| 19.17190066                                | 311.2570136                                    | 0.069172212                                               | 6.56920511                                 |
| 14.2567119                                 | 267.4577465                                    | 0.084475073                                               | 6.576267168                                |
| 15.98270142                                | 373.5688031                                    | 0.084850925                                               | 6.813817647                                |
| 13.14531354                                | 222.4842754                                    | 0.082154077                                               | 6.921087635                                |
| 52.64223066                                | 642.35181                                      | 0.045149055                                               | 6.718407257                                |
| 9.671126634                                | 301.6874645                                    | 0.113553993                                               | 6.577049049                                |
| 13.49276684                                | 107.4649533                                    | 0.085717093                                               | 6.302198809                                |
| 8.814518911                                | 86.96171171                                    | 0.119001603                                               | 6.544932207                                |
| 36.9298439                                 | 421.0762565                                    | 0.049022464                                               | 6.705895342                                |

| log.sigma.3.5.mm.3D_gldm_DependenceNonUniformity | log.sigma.3.5.mm.3D_gldm_GrayLevelNonUniformity | log.sigma.3.5.mm.3D_gldm_SmallDependenceEmphasis |
|--------------------------------------------------|-------------------------------------------------|--------------------------------------------------|
| 173.7082294                                      | 77.38736492                                     | 0.232840399                                      |
| 279.479                                          | 154.358                                         | 0.20542532                                       |
| 204.8318426                                      | 76.96779964                                     | 0.281660704                                      |
| 343.9359967                                      | 195.6767224                                     | 0.212944883                                      |
| 102.5279241                                      | 97.77133825                                     | 0.172372322                                      |
| 208.4188034                                      | 150.9304029                                     | 0.181592862                                      |
| 94.54020814                                      | 134.2317881                                     | 0.120377929                                      |
| 239.8631579                                      | 136.6432133                                     | 0.2137912                                        |
| 290.4385792                                      | 144.4908732                                     | 0.236964896                                      |
| 511.8984349                                      | 199.964369                                      | 0.248201574                                      |
| 212.5882678                                      | 182.1034864                                     | 0.154819309                                      |
| 285.2207715                                      | 120.2925816                                     | 0.269604726                                      |
| 316.4810516                                      | 299.0300444                                     | 0.165086405                                      |
| 282.4413348                                      | 145.5209903                                     | 0.217668463                                      |
| 233.7609819                                      | 100.3113695                                     | 0.249382481                                      |
| 509.9218788                                      | 309.1080555                                     | 0.222977385                                      |
| 207.6330218                                      | 132.7981308                                     | 0.199391156                                      |
| 317.1383894                                      | 205.1735731                                     | 0.17089664                                       |
| 175.5774648                                      | 87.35739437                                     | 0.254216713                                      |
| 394.9351948                                      | 229.0751465                                     | 0.193532248                                      |
| 1055.103309                                      | 494.3879137                                     | 0.226344942                                      |
| 316.1466289                                      | 159.1216407                                     | 0.217076282                                      |
| 665.955108                                       | 290.8097549                                     | 0.235238929                                      |
| 135.4019417                                      | 78.76893204                                     | 0.194387898                                      |
| 448.5599078                                      | 161.7488479                                     | 0.253923716                                      |
| 234.2781065                                      | 86.17455621                                     | 0.283851697                                      |
| 360.8787879                                      | 163.3500678                                     | 0.264836186                                      |
| 638.2274218                                      | 223.5651267                                     | 0.286818801                                      |
| 427.8708444                                      | 292.5092674                                     | 0.20226749                                       |
| 444.0174106                                      | 245.4957265                                     | 0.237022539                                      |
| 610.7416707                                      | 296.2940608                                     | 0.210525079                                      |
| 757.6528                                         | 358.9644                                        | 0.226899685                                      |
| 345.4140656                                      | 201.4796523                                     | 0.192856599                                      |
| 61.83575884                                      | 42.46777547                                     | 0.230454033                                      |
| 145.7972973                                      | 64.19369369                                     | 0.250209449                                      |
| 412.5760025                                      | 281.9735779                                     | 0.190765055                                      |
| 559.3054077                                      | 220.9019333                                     | 0.254283325                                      |
| 460.1436155                                      | 295.5785904                                     | 0.200289398                                      |
| 166.6239892                                      | 152.5673854                                     | 0.136294363                                      |
| 204.3447433                                      | 144.5244499                                     | 0.167078186                                      |
| 206.9057751                                      | 107.9650456                                     | 0.247567973                                      |
| 247.742236                                       | 161.1573499                                     | 0.193640287                                      |
| 350.0981169                                      | 264.3756194                                     | 0.171110001                                      |
| 229.4087049                                      | 174.029724                                      | 0.188229798                                      |
| 484.485976                                       | 235.6439611                                     | 0.225819776                                      |
| 555.1706294                                      | 247.3144056                                     | 0.215845278                                      |
| 543.2354856                                      | 259.0054259                                     | 0.243379428                                      |
| 202.182058                                       | 135.0158311                                     | 0.19907153                                       |
| 61.96453901                                      | 58.23758865                                     | 0.195168382                                      |
| 128.8385321                                      | 102.1082569                                     | 0.204600479                                      |
| 439.7334337                                      | 364.9769076                                     | 0.156664881                                      |
| 199.4059305                                      | 240.7433538                                     | 0.137856033                                      |
| 464.4943376                                      | 308.5575454                                     | 0.181443434                                      |
| 194.0111016                                      | 86.3116994                                      | 0.244281611                                      |
| 599.7818136                                      | 275.7660655                                     | 0.216881068                                      |
| 306.6302966                                      | 120.4036017                                     | 0.255121956                                      |
| 502.4656908                                      | 225.7965843                                     | 0.245137128                                      |
| 227.6907895                                      | 263.2631579                                     | 0.164299718                                      |
| 220.8061224                                      | 102.9533528                                     | 0.252691167                                      |
| 187.6918149                                      | 162.4733096                                     | 0.142251675                                      |
| 365.8092486                                      | 212.3138388                                     | 0.199400345                                      |
| 697.6382358                                      | 447.2423911                                     | 0.201475563                                      |
| 324.3535887                                      | 167.7476882                                     | 0.227815765                                      |
| 356.6584582                                      | 130.4571734                                     | 0.23926456                                       |
| 94.79322034                                      | 43.49491525                                     | 0.262140619                                      |
| 231.808814                                       | 108.0174984                                     | 0.262187101                                      |
| 143.6994329                                      | 81.11720227                                     | 0.218817524                                      |
| 509.3213685                                      | 246.4885025                                     | 0.207285844                                      |
| 167.8538283                                      | 109.1608662                                     | 0.184854375                                      |
| 371.3278819                                      | 176.041085                                      | 0.226693051                                      |
| 637.4164916                                      | 205.4532563                                     | 0.284310063                                      |
| 261.5046094                                      | 196.0790878                                     | 0.167899708                                      |
| 629.4005129                                      | 341.2804018                                     | 0.212693229                                      |
| 974.2440485                                      | 502.5874674                                     | 0.203366553                                      |
| 651.4645706                                      | 268.1154388                                     | 0.23594753                                       |
| 342.007293                                       | 164.3736594                                     | 0.228424697                                      |
| 280.6186837                                      | 224.6687898                                     | 0.165217333                                      |
| 214.2715232                                      | 104.1582046                                     | 0.232669466                                      |
| 467.490232                                       | 253.1941392                                     | 0.213406205                                      |
| 574.9389176                                      | 368.4956209                                     | 0.201349261                                      |
| 192.195301                                       | 106.9368576                                     | 0.229762498                                      |
| 432.1215657                                      | 176.2043658                                     | 0.271962211                                      |
| 391.9805982                                      | 172.8455942                                     | 0.246231635                                      |
| 51.73422562                                      | 63.53537285                                     | 0.169196665                                      |
| 637.0994303                                      | 255.2812015                                     | 0.237199012                                      |
| 454.3126079                                      | 271.5446172                                     | 0.186742487                                      |
| 226.245098                                       | 95.1372549                                      | 0.256460604                                      |
| 401.4134078                                      | 256.1390076                                     | 0.181879982                                      |
| 52.29440389                                      | 42.6836983                                      | 0.220309836                                      |
| 75.01384083                                      | 55.53633218                                     | 0.192357567                                      |
| 447.7355964                                      | 242.7813765                                     | 0.21292426                                       |
| 183.8669683                                      | 76.43529412                                     | 0.272709464                                      |
| 224.503201                                       | 131.950064                                      | 0.22471295                                       |
| 588.7574087                                      | 369.3560763                                     | 0.198035251                                      |
| 600.2277943                                      | 386.6170846                                     | 0.187767043                                      |
| 208.6651584                                      | 39.91176471                                     | 0.398477333                                      |
| 192.7231991                                      | 200.1956892                                     | 0.145986477                                      |
| 57.73831776                                      | 36.68691589                                     | 0.187492629                                      |
| 93.34009009                                      | 105.6734234                                     | 0.150519062                                      |
| 258.2772964                                      | 56.57192374                                     | 0.374925186                                      |

| log.sigma.3.5.mm.3D_gldm_DependenceNonUniformityNormalized | log.sigma.3.5.mm.3D_gldm_DependenceVariance | log.sigma.3.5.mm.3D_gldm_LargeDependenceEmphasis |
|------------------------------------------------------------|---------------------------------------------|--------------------------------------------------|
| 0.144395868                                                | 4.973117221                                 | 19.07148795                                      |
| 0.1397395                                                  | 6.078711                                    | 21.943                                           |
| 0.183212739                                                | 4.030337845                                 | 14.26118068                                      |
| 0.140210353                                                | 5.495792485                                 | 20.85976355                                      |
| 0.108037855                                                | 9.520269242                                 | 33.18967334                                      |
| 0.127239807                                                | 6.557138832                                 | 25.08180708                                      |
| 0.089442013                                                | 14.03855542                                 | 49.28192999                                      |
| 0.132888176                                                | 5.746652036                                 | 21.84875346                                      |
| 0.143284943                                                | 5.371332108                                 | 19.55155402                                      |
| 0.170462349                                                | 3.985092497                                 | 15.40692641                                      |
| 0.117647077                                                | 7.30816486                                  | 29.63862756                                      |
| 0.169270488                                                | 3.724524826                                 | 14.53827893                                      |
| 0.108050888                                                | 8.73356381                                  | 32.35336292                                      |
| 0.152013636                                                | 4.537875953                                 | 18.31324004                                      |
| 0.151008386                                                | 4.262622772                                 | 16.96899225                                      |
| 0.124098778                                                | 16.8295306                                  | 38.62472621                                      |
| 0.129366369                                                | 6.281966984                                 | 23.60934579                                      |
| 0.123979042                                                | 6.842127688                                 | 26.61297889                                      |
| 0.154557627                                                | 4.427293072                                 | 16.83802817                                      |
| 0.136137606                                                | 6.132572764                                 | 22.96208204                                      |
| 0.151813426                                                | 4.69228806                                  | 18.17122302                                      |
| 0.149055459                                                | 4.417311806                                 | 18.32201792                                      |
| 0.161600366                                                | 3.983559683                                 | 16.23610774                                      |
| 0.131458196                                                | 6.466419078                                 | 23.94368932                                      |
| 0.172258029                                                | 3.977101871                                 | 15.21658986                                      |
| 0.173282623                                                | 4.491918613                                 | 15.17011834                                      |
| 0.163219714                                                | 4.702507364                                 | 16.45273632                                      |
| 0.19023172                                                 | 2.836391177                                 | 11.98002981                                      |
| 0.12588139                                                 | 7.326517733                                 | 25.5425125                                       |
| 0.140556319                                                | 5.663574159                                 | 20.25989237                                      |
| 0.14745091                                                 | 4.6697299                                   | 19.08112023                                      |
| 0.15153056                                                 | 5.22431616                                  | 19.0092                                          |
| 0.136473357                                                | 5.401390986                                 | 21.85657843                                      |
| 0.128556671                                                | 10.2795026                                  | 29.03326403                                      |
| 0.164186146                                                | 4.309892663                                 | 16.16891892                                      |
| 0.12824868                                                 | 6.995222478                                 | 25.2026733                                       |
| 0.156712078                                                | 4.616326684                                 | 16.9557299                                       |
| 0.135695552                                                | 5.743782025                                 | 22.13063993                                      |
| 0.112280316                                                | 9.103375811                                 | 34.52291105                                      |
| 0.1249051                                                  | 7.792785792                                 | 28.05378973                                      |
| 0.157223233                                                | 4.220734287                                 | 16.60942249                                      |
| 0.128230971                                                | 6.904858352                                 | 25.11283644                                      |
| 0.115658446                                                | 8.350200033                                 | 30.03865213                                      |
| 0.121766828                                                | 7.708966106                                 | 27.48407643                                      |
| 0.138662271                                                | 8.645438791                                 | 24.94447624                                      |
| 0.155292484                                                | 3.82713005                                  | 17.08895105                                      |
| 0.147378048                                                | 6.393725404                                 | 20.49593055                                      |
| 0.133365474                                                | 5.612923887                                 | 22.29551451                                      |
| 0.109866204                                                | 9.45071928                                  | 31.92907801                                      |
| 0.118200488                                                | 8.897180372                                 | 28.9412844                                       |
| 0.110374858                                                | 8.05150925                                  | 31.54869478                                      |
| 0.101945772                                                | 10.02759691                                 | 37.71370143                                      |
| 0.12233193                                                 | 7.279004556                                 | 26.86726363                                      |
| 0.165679848                                                | 3.256332038                                 | 14.66353544                                      |
| 0.152344885                                                | 4.706219606                                 | 18.498095                                        |
| 0.162410115                                                | 4.11070813                                  | 15.83262712                                      |
| 0.153237478                                                | 5.830708434                                 | 19.19030192                                      |
| 0.093622858                                                | 12.95315746                                 | 42.66282895                                      |
| 0.160937407                                                | 4.25002125                                  | 16.2361516                                       |
| 0.13358848                                                 | 4.491500361                                 | 24.34946619                                      |
| 0.124382607                                                | 7.671461444                                 | 26.43352601                                      |
| 0.127143837                                                | 7.156820291                                 | 25.10679789                                      |
| 0.142824125                                                | 5.668170707                                 | 20.36767944                                      |
| 0.190930652                                                | 2.553750992                                 | 12.63811563                                      |
| 0.160666475                                                | 4.214179833                                 | 15.95932203                                      |
| 0.150232543                                                | 4.724046758                                 | 17.43421905                                      |
| 0.13582177                                                 | 6.391290054                                 | 22.3610586                                       |
| 0.14282708                                                 | 5.343337352                                 | 20.59842961                                      |
| 0.129817346                                                | 5.598366838                                 | 23.27996906                                      |
| 0.148116427                                                | 5.581682498                                 | 19.78739529                                      |
| 0.167388785                                                | 4.142555919                                 | 14.94537815                                      |
| 0.126882392                                                | 5.364663545                                 | 24.20135856                                      |
| 0.134516032                                                | 5.892887425                                 | 21.94250908                                      |
| 0.149630479                                                | 4.63258782                                  | 19.12071878                                      |
| 0.152854193                                                | 4.442177672                                 | 17.48474894                                      |
| 0.146721275                                                | 5.629786801                                 | 19.96954097                                      |
| 0.119158677                                                | 6.781091683                                 | 27.45944798                                      |
| 0.157668523                                                | 3.958227953                                 | 16.51140545                                      |
| 0.142701536                                                | 4.927571818                                 | 19.69230769                                      |
| 0.129112714                                                | 6.792987859                                 | 24.32450034                                      |
| 0.141112556                                                | 6.074359422                                 | 21.10279001                                      |
| 0.16263514                                                 | 4.087954798                                 | 15.39141889                                      |
| 0.158440015                                                | 5.218659508                                 | 17.99191593                                      |
| 0.098918213                                                | 10.28143999                                 | 36.99235182                                      |
| 0.164966191                                                | 3.936412122                                 | 15.98964267                                      |
| 0.130775074                                                | 5.908946101                                 | 23.50834773                                      |
| 0.158434943                                                | 5.508107164                                 | 18.19327731                                      |
| 0.131913706                                                | 5.439115908                                 | 22.92047322                                      |
| 0.127236992                                                | 6.362915209                                 | 23.33090024                                      |
| 0.129781732                                                | 7.677542175                                 | 26.17647059                                      |
| 0.139438056                                                | 6.756991814                                 | 22.67985051                                      |
| 0.166395446                                                | 3.24212854                                  | 13.94479638                                      |
| 0.143728042                                                | 4.612935909                                 | 18.76440461                                      |
| 0.135253253                                                | 5.848754175                                 | 22.35814381                                      |
| 0.127545218                                                | 6.131560672                                 | 24.19677008                                      |
| 0.236046559                                                | 2.111253865                                 | 8.226244344                                      |
| 0.109315484                                                | 7.983296919                                 | 32.43051617                                      |
| 0.134902612                                                | 6.806249454                                 | 24.53271028                                      |
| 0.105112714                                                | 13.34390472                                 | 41.02477477                                      |
| 0.223810482                                                | 1.932466081                                 | 8.414211438                                      |

|                                                              |                                                               |                                                               |
|--------------------------------------------------------------|---------------------------------------------------------------|---------------------------------------------------------------|
| log.sigma.3.5.mm.3D_gldm_LargeDependenceLowGrayLevelEmphasis | log.sigma.3.5.mm.3D_gldm_SmallDependenceHighGrayLevelEmphasis | log.sigma.3.5.mm.3D_gldm_LargeDependenceHighGrayLevelEmphasis |
| 0.168143879                                                  | 56.97295396                                                   | 3474.965087                                                   |
| 0.18172036                                                   | 46.98070576                                                   | 3813.781                                                      |
| 0.105020749                                                  | 52.60466993                                                   | 2987.984794                                                   |
| 0.142850463                                                  | 46.90463178                                                   | 3815.154912                                                   |
| 0.468711896                                                  | 24.92891672                                                   | 2883.286617                                                   |
| 0.228476717                                                  | 27.22497317                                                   | 3519.602564                                                   |
| 0.961689183                                                  | 13.86394293                                                   | 3072.406812                                                   |
| 0.094157038                                                  | 71.12673925                                                   | 6363.227147                                                   |
| 0.101951489                                                  | 63.2091099                                                    | 4556.978293                                                   |
| 0.03914418                                                   | 110.4095679                                                   | 6972.66367                                                    |
| 0.1623236                                                    | 32.49474876                                                   | 6104.143885                                                   |
| 0.096893557                                                  | 61.03240195                                                   | 3272.845104                                                   |
| 0.164219589                                                  | 43.12261106                                                   | 6932.204165                                                   |
| 0.180145989                                                  | 33.22517549                                                   | 2812.579117                                                   |
| 0.112878031                                                  | 52.29614209                                                   | 3441.268734                                                   |
| 0.127174653                                                  | 89.52093561                                                   | 12863.24897                                                   |
| 0.073580583                                                  | 63.75131101                                                   | 8726.472897                                                   |
| 0.116893967                                                  | 57.94654304                                                   | 6907.643471                                                   |
| 0.081908626                                                  | 74.27168914                                                   | 4081.507042                                                   |
| 0.131380108                                                  | 49.51671259                                                   | 5222.496381                                                   |
| 0.073784982                                                  | 66.54521674                                                   | 5585.116403                                                   |
| 0.053221318                                                  | 83.51890969                                                   | 7175.680339                                                   |
| 0.08144341                                                   | 64.11890603                                                   | 4389.275661                                                   |
| 0.146686319                                                  | 51.47321636                                                   | 5143.75534                                                    |
| 0.119888569                                                  | 55.03452749                                                   | 3309.466974                                                   |
| 0.044050312                                                  | 126.9332639                                                   | 6143.902367                                                   |
| 0.113568543                                                  | 48.52872724                                                   | 2992.755767                                                   |
| 0.052647183                                                  | 79.53573307                                                   | 3827.120715                                                   |
| 0.101966141                                                  | 63.35539276                                                   | 7275.198882                                                   |
| 0.068936531                                                  | 80.72280992                                                   | 6680.031022                                                   |
| 0.048727493                                                  | 83.50683194                                                   | 8631.624577                                                   |
| 0.088775194                                                  | 66.20618695                                                   | 5038.6262                                                     |
| 0.090804234                                                  | 78.98078891                                                   | 8025.856974                                                   |
| 0.298817623                                                  | 42.40270543                                                   | 3512.862786                                                   |
| 0.078960565                                                  | 70.55722597                                                   | 4571.371622                                                   |
| 0.099504302                                                  | 58.23940942                                                   | 7147.649052                                                   |
| 0.053756136                                                  | 106.6635818                                                   | 6733.218268                                                   |
| 0.051074003                                                  | 87.25924054                                                   | 10277.47007                                                   |
| 0.234258629                                                  | 27.45534905                                                   | 5772.302561                                                   |
| 0.263697116                                                  | 32.88734258                                                   | 3624.452934                                                   |
| 0.123028386                                                  | 48.42527512                                                   | 3135.985562                                                   |
| 0.201462286                                                  | 37.6469899                                                    | 3779.403209                                                   |
| 0.125953125                                                  | 51.96848769                                                   | 7920.326396                                                   |
| 0.285956394                                                  | 33.71372719                                                   | 3272.798832                                                   |
| 0.055065655                                                  | 111.5636018                                                   | 12907.74184                                                   |
| 0.094945361                                                  | 50.93959269                                                   | 4431.246993                                                   |
| 0.074791605                                                  | 87.41083609                                                   | 6913.135377                                                   |
| 0.062371151                                                  | 70.97967163                                                   | 9200.279683                                                   |
| 0.625976593                                                  | 24.90713631                                                   | 2205.757092                                                   |
| 0.284495662                                                  | 38.85502324                                                   | 3486.878899                                                   |
| 0.139835513                                                  | 48.91627024                                                   | 8092.644327                                                   |
| 0.135232076                                                  | 45.0848896                                                    | 11422.77352                                                   |
| 0.163979939                                                  | 47.83507493                                                   | 5134.829866                                                   |
| 0.043904561                                                  | 93.17954854                                                   | 5634.283518                                                   |
| 0.090093336                                                  | 62.41793191                                                   | 4677.602489                                                   |
| 0.067543576                                                  | 83.37002463                                                   | 4879.189619                                                   |
| 0.031973951                                                  | 165.6637887                                                   | 12460.4419                                                    |
| 0.279775874                                                  | 42.94007624                                                   | 7215.976151                                                   |
| 0.058214877                                                  | 89.29548623                                                   | 6135.930029                                                   |
| 0.262762828                                                  | 15.01186499                                                   | 2886.154448                                                   |
| 0.115160938                                                  | 64.60205219                                                   | 7054.513431                                                   |
| 0.061250717                                                  | 94.11634493                                                   | 11241.33607                                                   |
| 0.074292562                                                  | 77.09332928                                                   | 6528.366358                                                   |
| 0.056699931                                                  | 60.18414828                                                   | 3632.342612                                                   |
| 0.21858513                                                   | 30.67326087                                                   | 1865.452542                                                   |
| 0.128223881                                                  | 74.29291925                                                   | 3215.351912                                                   |
| 0.183197827                                                  | 50.94665094                                                   | 3436.830813                                                   |
| 0.079901896                                                  | 73.03019701                                                   | 6265.235838                                                   |
| 0.09408074                                                   | 46.27015052                                                   | 6590.776489                                                   |
| 0.044612839                                                  | 116.7828112                                                   | 9633.024731                                                   |
| 0.042105383                                                  | 138.2385451                                                   | 7024.738708                                                   |
| 0.10996591                                                   | 52.09574888                                                   | 5905.398836                                                   |
| 0.110346296                                                  | 64.06622958                                                   | 5650.6433                                                     |
| 0.054802742                                                  | 75.57357967                                                   | 7542.252649                                                   |
| 0.053874644                                                  | 102.7001358                                                   | 6944.189582                                                   |
| 0.065157955                                                  | 87.21301706                                                   | 7519.941656                                                   |
| 0.129092084                                                  | 41.31004473                                                   | 6768.841614                                                   |
| 0.086319016                                                  | 58.09475678                                                   | 3958.699779                                                   |
| 0.058558171                                                  | 75.70669866                                                   | 7526.341575                                                   |
| 0.080990345                                                  | 66.13268247                                                   | 8417.410734                                                   |
| 0.033641438                                                  | 152.3142627                                                   | 14370.56975                                                   |
| 0.036630078                                                  | 124.2881385                                                   | 7697.775687                                                   |
| 0.071940162                                                  | 86.84474697                                                   | 5795.657639                                                   |
| 0.900834007                                                  | 16.49539249                                                   | 1894.114723                                                   |
| 0.040997798                                                  | 105.7350487                                                   | 7373.115225                                                   |
| 0.243061171                                                  | 29.97742587                                                   | 3052.486183                                                   |
| 0.087188966                                                  | 81.61148151                                                   | 5121.895658                                                   |
| 0.095400569                                                  | 56.06499161                                                   | 6209.942491                                                   |
| 0.970491509                                                  | 12.73906511                                                   | 1071.221411                                                   |
| 0.159270708                                                  | 39.56784786                                                   | 5415.453287                                                   |
| 0.093372263                                                  | 72.39986684                                                   | 6258.46839                                                    |
| 0.055846889                                                  | 81.0136093                                                    | 4330.467873                                                   |
| 0.08263938                                                   | 54.05222399                                                   | 5310.739437                                                   |
| 0.067600819                                                  | 73.66466051                                                   | 8231.426832                                                   |
| 0.140722049                                                  | 43.23831582                                                   | 4992.808117                                                   |
| 0.021513581                                                  | 236.8162183                                                   | 5774.946833                                                   |
| 0.125079938                                                  | 44.93959769                                                   | 9296.782189                                                   |
| 0.478167662                                                  | 22.65642027                                                   | 1818.030374                                                   |
| 0.681449513                                                  | 14.79259014                                                   | 2931.677928                                                   |
| 0.037079681                                                  | 140.9671379                                                   | 3906.958406                                                   |

| log.sigma.3.5.mm.3D_gldm_SmallDependenceLowGrayLevelEmphasis | log.sigma.3.5.mm.3D_gldm_LowGrayLevelEmphasis | log.sigma.3.5.mm.3D_gldzm_DistanceZoneVariabilityNormalized |
|--------------------------------------------------------------|-----------------------------------------------|-------------------------------------------------------------|
| 0.003151438                                                  | 0.012876699                                   | 1                                                           |
| 0.002179362                                                  | 0.010106861                                   | 1                                                           |
| 0.005367728                                                  | 0.012405763                                   | 1                                                           |
| 0.002608046                                                  | 0.008712593                                   | 1                                                           |
| 0.003875128                                                  | 0.015878204                                   | 1                                                           |
| 0.003815172                                                  | 0.013260209                                   | 1                                                           |
| 0.003537723                                                  | 0.020640129                                   | 1                                                           |
| 0.001680105                                                  | 0.005275956                                   | 1                                                           |
| 0.002107506                                                  | 0.005949982                                   | 1                                                           |
| 0.001199129                                                  | 0.003227831                                   | 0.9978022                                                   |
| 0.001734555                                                  | 0.006333828                                   | 1                                                           |
| 0.003050949                                                  | 0.009863603                                   | 1                                                           |
| 0.001445706                                                  | 0.005691723                                   | 1                                                           |
| 0.004393101                                                  | 0.014101248                                   | 1                                                           |
| 0.003178673                                                  | 0.008576876                                   | 1                                                           |
| 0.001133216                                                  | 0.003717798                                   | 0.994392568                                                 |
| 0.001762426                                                  | 0.004877155                                   | 1                                                           |
| 0.001235844                                                  | 0.004580687                                   | 1                                                           |
| 0.002276976                                                  | 0.005823681                                   | 1                                                           |
| 0.001519554                                                  | 0.007109625                                   | 1                                                           |
| 0.001706375                                                  | 0.005274403                                   | 0.995746962                                                 |
| 0.001324783                                                  | 0.003751499                                   | 1                                                           |
| 0.001621289                                                  | 0.006231408                                   | 0.998280311                                                 |
| 0.003269437                                                  | 0.008838829                                   | 1                                                           |
| 0.002970626                                                  | 0.008932622                                   | 1                                                           |
| 0.001987144                                                  | 0.004032904                                   | 1                                                           |
| 0.003414849                                                  | 0.008864059                                   | 1                                                           |
| 0.002250732                                                  | 0.005633152                                   | 1                                                           |
| 0.00210687                                                   | 0.005509142                                   | 1                                                           |
| 0.001707713                                                  | 0.00443661                                    | 1                                                           |
| 0.001193637                                                  | 0.003409545                                   | 1                                                           |
| 0.001616076                                                  | 0.005150138                                   | 1                                                           |
| 0.001201433                                                  | 0.004839314                                   | 1                                                           |
| 0.006713171                                                  | 0.013605438                                   | 1                                                           |
| 0.002287321                                                  | 0.007907795                                   | 1                                                           |
| 0.00120285                                                   | 0.004852016                                   | 1                                                           |
| 0.001442319                                                  | 0.004076311                                   | 1                                                           |
| 0.000931432                                                  | 0.002870613                                   | 1                                                           |
| 0.001712225                                                  | 0.008542046                                   | 1                                                           |
| 0.002169014                                                  | 0.01013114                                    | 1                                                           |
| 0.002909441                                                  | 0.009701104                                   | 1                                                           |
| 0.00241505                                                   | 0.008542972                                   | 1                                                           |
| 0.001210622                                                  | 0.004580802                                   | 1                                                           |
| 0.003226655                                                  | 0.012279507                                   | 1                                                           |
| 0.00120462                                                   | 0.003092018                                   | 1                                                           |
| 0.001891349                                                  | 0.006898029                                   | 1                                                           |
| 0.001450972                                                  | 0.004894365                                   | 0.988636735                                                 |
| 0.001614452                                                  | 0.004241627                                   | 1                                                           |
| 0.003551315                                                  | 0.022596857                                   | 1                                                           |
| 0.004365489                                                  | 0.01205094                                    | 1                                                           |
| 0.000984267                                                  | 0.005064523                                   | 1                                                           |
| 0.000980844                                                  | 0.005006782                                   | 1                                                           |
| 0.001447229                                                  | 0.006289963                                   | 0.997333338                                                 |
| 0.001715983                                                  | 0.003910604                                   | 1                                                           |
| 0.001868495                                                  | 0.005847977                                   | 0.9979798                                                   |
| 0.001951859                                                  | 0.005438432                                   | 1                                                           |
| 0.000804615                                                  | 0.002060648                                   | 0.997874604                                                 |
| 0.001338217                                                  | 0.007181921                                   | 1                                                           |
| 0.001528495                                                  | 0.005462452                                   | 1                                                           |
| 0.002767274                                                  | 0.013833924                                   | 1                                                           |
| 0.001437636                                                  | 0.004684097                                   | 1                                                           |
| 0.000946742                                                  | 0.002979124                                   | 1                                                           |
| 0.001695568                                                  | 0.004830136                                   | 1                                                           |
| 0.002204976                                                  | 0.005938981                                   | 1                                                           |
| 0.008473601                                                  | 0.018974485                                   | 1                                                           |
| 0.001821053                                                  | 0.007588188                                   | 1                                                           |
| 0.002949594                                                  | 0.009778364                                   | 1                                                           |
| 0.001301671                                                  | 0.004378868                                   | 1                                                           |
| 0.001942994                                                  | 0.005379837                                   | 1                                                           |
| 0.001102524                                                  | 0.002860411                                   | 1                                                           |
| 0.001129133                                                  | 0.003142449                                   | 1                                                           |
| 0.001399753                                                  | 0.005086406                                   | 1                                                           |
| 0.001554126                                                  | 0.005826561                                   | 1                                                           |
| 0.000962718                                                  | 0.003363414                                   | 0.998664887                                                 |
| 0.001312255                                                  | 0.00389401                                    | 1                                                           |
| 0.001436353                                                  | 0.00465685                                    | 1                                                           |
| 0.002297704                                                  | 0.006966913                                   | 1                                                           |
| 0.002707853                                                  | 0.007212309                                   | 1                                                           |
| 0.001289422                                                  | 0.003884426                                   | 1                                                           |
| 0.001352314                                                  | 0.004380815                                   | 1                                                           |
| 0.001540858                                                  | 0.002788648                                   | 1                                                           |
| 0.001523462                                                  | 0.003546658                                   | 1                                                           |
| 0.001854499                                                  | 0.005587501                                   | 1                                                           |
| 0.005376872                                                  | 0.022665389                                   | 1                                                           |
| 0.001018055                                                  | 0.003088992                                   | 0.998142991                                                 |
| 0.002484928                                                  | 0.010880809                                   | 0.997260279                                                 |
| 0.002756561                                                  | 0.007606685                                   | 1                                                           |
| 0.001237552                                                  | 0.004585054                                   | 1                                                           |
| 0.01216625                                                   | 0.038757904                                   | 1                                                           |
| 0.00301134                                                   | 0.011011009                                   | 1                                                           |
| 0.001179028                                                  | 0.004198629                                   | 1                                                           |
| 0.002815594                                                  | 0.005912027                                   | 1                                                           |
| 0.002716074                                                  | 0.007451112                                   | 1                                                           |
| 0.001084692                                                  | 0.003859086                                   | 1                                                           |
| 0.001638673                                                  | 0.006437536                                   | 0.997952919                                                 |
| 0.002829456                                                  | 0.004769034                                   | 1                                                           |
| 0.000911641                                                  | 0.004985152                                   | 1                                                           |
| 0.005749097                                                  | 0.019344773                                   | 1                                                           |
| 0.00504029                                                   | 0.020752741                                   | 1                                                           |
| 0.003391296                                                  | 0.006587647                                   | 1                                                           |

| log.sigma.3.5.mm.3D_gldzm_LowIntensityEmphasis | log.sigma.3.5.mm.3D_gldzm_LargeDistanceEmphasis | log.sigma.3.5.mm.3D_gldzm_HighIntensitySmallDistanceEmphasis |
|------------------------------------------------|-------------------------------------------------|--------------------------------------------------------------|
| 0.017162767                                    | 1                                               | 252.3333333                                                  |
| 0.011378498                                    | 1                                               | 237.614                                                      |
| 0.018476216                                    | 1                                               | 189.2282051                                                  |
| 0.012828384                                    | 1                                               | 224.0562914                                                  |
| 0.021300731                                    | 1                                               | 151.0461538                                                  |
| 0.022136449                                    | 1                                               | 151.5367232                                                  |
| 0.031095491                                    | 1                                               | 122.56                                                       |
| 0.007983796                                    | 1                                               | 340.295045                                                   |
| 0.00871568                                     | 1                                               | 273.400369                                                   |
| 0.004583679                                    | 1.00330033                                      | 449.5976348                                                  |
| 0.011014264                                    | 1                                               | 211.0512821                                                  |
| 0.012965982                                    | 1                                               | 227.2342342                                                  |
| 0.008424904                                    | 1                                               | 266.6972973                                                  |
| 0.020634767                                    | 1                                               | 153.791498                                                   |
| 0.012428868                                    | 1                                               | 212.0845987                                                  |
| 0.005041127                                    | 1.008434864                                     | 402.43791                                                    |
| 0.0087027                                      | 1                                               | 325.1105263                                                  |
| 0.00696829                                     | 1                                               | 345.5376782                                                  |
| 0.008469189                                    | 1                                               | 297.4117647                                                  |
| 0.009208422                                    | 1                                               | 261.4153846                                                  |
| 0.007533354                                    | 1.006393181                                     | 294.2815663                                                  |
| 0.005765417                                    | 1                                               | 387.4181818                                                  |
| 0.007570373                                    | 1.002581756                                     | 273.685241                                                   |
| 0.01587976                                     | 1                                               | 269.9268293                                                  |
| 0.0113765                                      | 1                                               | 219.0779874                                                  |
| 0.006399967                                    | 1                                               | 454.4365591                                                  |
| 0.012439394                                    | 1                                               | 188.548105                                                   |
| 0.007691433                                    | 1                                               | 279.3794872                                                  |
| 0.010377822                                    | 1                                               | 315.3626667                                                  |
| 0.006875801                                    | 1                                               | 343.6214367                                                  |
| 0.005437022                                    | 1                                               | 401.9525194                                                  |
| 0.006961122                                    | 1                                               | 298.208622                                                   |
| 0.006518837                                    | 1                                               | 413.433213                                                   |
| 0.025992354                                    | 1                                               | 186.9022556                                                  |
| 0.010933745                                    | 1                                               | 282.4836364                                                  |
| 0.007006395                                    | 1                                               | 304.4900285                                                  |
| 0.005670791                                    | 1                                               | 423.0709617                                                  |
| 0.004582724                                    | 1                                               | 437.4511873                                                  |
| 0.014825335                                    | 1                                               | 212.1764706                                                  |
| 0.013438663                                    | 1                                               | 201.5587302                                                  |
| 0.012871663                                    | 1                                               | 201.0104167                                                  |
| 0.012057571                                    | 1                                               | 200.8837209                                                  |
| 0.007146389                                    | 1                                               | 306.4082734                                                  |
| 0.017977913                                    | 1                                               | 188.1489899                                                  |
| 0.005110041                                    | 1                                               | 494.627409                                                   |
| 0.009246142                                    | 1                                               | 232.0885936                                                  |
| 0.006484232                                    | 1.017142857                                     | 360.1840476                                                  |
| 0.007930419                                    | 1                                               | 352.4444444                                                  |
| 0.022730792                                    | 1                                               | 136.778626                                                   |
| 0.019553146                                    | 1                                               | 195.701107                                                   |
| 0.007232498                                    | 1                                               | 316.6205882                                                  |
| 0.009248986                                    | 1                                               | 328.0440678                                                  |
| 0.008101339                                    | 1.00400534                                      | 270.0186916                                                  |
| 0.006363061                                    | 1                                               | 388.6397695                                                  |
| 0.008608652                                    | 1.003033367                                     | 292.117543                                                   |
| 0.007447235                                    | 1                                               | 333.4941176                                                  |
| 0.003097642                                    | 1.003191489                                     | 686.7542553                                                  |
| 0.009071528                                    | 1                                               | 270.9262473                                                  |
| 0.007413728                                    | 1                                               | 356.2711864                                                  |
| 0.023089813                                    | 1                                               | 105.8779343                                                  |
| 0.006977901                                    | 1                                               | 333.6820276                                                  |
| 0.004652109                                    | 1                                               | 467.4496374                                                  |
| 0.007413217                                    | 1                                               | 340.1459732                                                  |
| 0.0088106                                      | 1                                               | 254.6405959                                                  |
| 0.030661179                                    | 1                                               | 119.4456522                                                  |
| 0.007830616                                    | 1                                               | 292.3390558                                                  |
| 0.012822062                                    | 1                                               | 239.5107143                                                  |
| 0.006223686                                    | 1                                               | 363.1818182                                                  |
| 0.01011956                                     | 1                                               | 244.6457565                                                  |
| 0.004549685                                    | 1                                               | 517.5468053                                                  |
| 0.003957806                                    | 1                                               | 489.695962                                                   |
| 0.00805627                                     | 1                                               | 323.8453333                                                  |
| 0.007524013                                    | 1                                               | 306.2340792                                                  |
| 0.00472234                                     | 1.002004008                                     | 371.1731797                                                  |
| 0.005372841                                    | 1                                               | 440.9370805                                                  |
| 0.007048981                                    | 1                                               | 378.9712                                                     |
| 0.014866966                                    | 1                                               | 253.4052133                                                  |
| 0.011530078                                    | 1                                               | 251.8870968                                                  |
| 0.005992124                                    | 1                                               | 353.4136646                                                  |
| 0.006674533                                    | 1                                               | 327.5148042                                                  |
| 0.005972276                                    | 1                                               | 672.3342246                                                  |
| 0.005507253                                    | 1                                               | 458.3969555                                                  |
| 0.008113837                                    | 1                                               | 355.7793696                                                  |
| 0.028866266                                    | 1                                               | 104.6857143                                                  |
| 0.004181617                                    | 1.002788104                                     | 447.0966543                                                  |
| 0.013688419                                    | 1.004115226                                     | 164.7301097                                                  |
| 0.011480169                                    | 1                                               | 321.4908257                                                  |
| 0.006711347                                    | 1                                               | 311.0210016                                                  |
| 0.052469104                                    | 1                                               | 59.11428571                                                  |
| 0.018587889                                    | 1                                               | 210.0592593                                                  |
| 0.00530483                                     | 1                                               | 347.1047382                                                  |
| 0.009696086                                    | 1                                               | 300.6685237                                                  |
| 0.01278886                                     | 1                                               | 240.2971014                                                  |
| 0.005669834                                    | 1                                               | 373.4246714                                                  |
| 0.008671902                                    | 1.00307377                                      | 236.1270492                                                  |
| 0.00670869                                     | 1                                               | 601.0188679                                                  |
| 0.007819551                                    | 1                                               | 310.814433                                                   |
| 0.029559618                                    | 1                                               | 128.4565217                                                  |
| 0.033308354                                    | 1                                               | 100.1089744                                                  |
| 0.008868162                                    | 1                                               | 380.925144                                                   |

| log.sigma.3.5.mm.3D_gldzm_LowintensityLargeDistanceEmphasis | log.sigma.3.5.mm.3D_gldzm_HighIntensityEmphasis | log.sigma.3.5.mm.3D_gldzm_DistanceZoneVariability | log.sigma.3.5.mm.3D_gldzm_ZonePercentage |
|-------------------------------------------------------------|-------------------------------------------------|---------------------------------------------------|------------------------------------------|
| 0.017162767                                                 | 252.333333                                      | 333                                               | 0.27680798                               |
| 0.011378498                                                 | 237.614                                         | 500                                               | 0.25                                     |
| 0.018476216                                                 | 189.2282051                                     | 390                                               | 0.348837209                              |
| 0.012828384                                                 | 224.0562914                                     | 604                                               | 0.246229107                              |
| 0.021300731                                                 | 151.0461538                                     | 195                                               | 0.205479452                              |
| 0.022136449                                                 | 151.5367232                                     | 354                                               | 0.216117216                              |
| 0.031095491                                                 | 122.56                                          | 150                                               | 0.141911069                              |
| 0.007983796                                                 | 340.295045                                      | 444                                               | 0.24598338                               |
| 0.00871568                                                  | 273.400369                                      | 542                                               | 0.267390232                              |
| 0.004592821                                                 | 449.8954895                                     | 907.0022002                                       | 0.302697303                              |
| 0.011014264                                                 | 211.0512821                                     | 312                                               | 0.172661871                              |
| 0.012965982                                                 | 227.2342342                                     | 555                                               | 0.329376855                              |
| 0.008424904                                                 | 266.6972973                                     | 555                                               | 0.189484466                              |
| 0.020634767                                                 | 153.791498                                      | 494                                               | 0.265877287                              |
| 0.012428868                                                 | 212.0845987                                     | 461                                               | 0.297803618                              |
| 0.005076134                                                 | 403.158388                                      | 1061.01687                                        | 0.259673887                              |
| 0.0087027                                                   | 325.1105263                                     | 380                                               | 0.236760125                              |
| 0.00696829                                                  | 345.5376782                                     | 491                                               | 0.191946833                              |
| 0.008469189                                                 | 297.4117647                                     | 340                                               | 0.299295775                              |
| 0.009208422                                                 | 261.4153846                                     | 650                                               | 0.224060669                              |
| 0.007554769                                                 | 294.8129995                                     | 1869.017048                                       | 0.270071942                              |
| 0.005765417                                                 | 387.4181818                                     | 550                                               | 0.259311645                              |
| 0.00759171                                                  | 273.7633391                                     | 1160.001721                                       | 0.281970396                              |
| 0.01587976                                                  | 269.9268293                                     | 246                                               | 0.238834951                              |
| 0.0113765                                                   | 219.0779874                                     | 795                                               | 0.305299539                              |
| 0.00639967                                                  | 454.4365591                                     | 465                                               | 0.343934911                              |
| 0.012439394                                                 | 188.548105                                      | 686                                               | 0.310266848                              |
| 0.007691433                                                 | 279.3794872                                     | 1170                                              | 0.348733234                              |
| 0.010377822                                                 | 315.3626667                                     | 750                                               | 0.220653133                              |
| 0.006875801                                                 | 343.6214367                                     | 877                                               | 0.2776195                                |
| 0.005437022                                                 | 401.9525194                                     | 1032                                              | 0.249154998                              |
| 0.006961122                                                 | 298.208622                                      | 1299                                              | 0.2598                                   |
| 0.006518837                                                 | 413.433213                                      | 554                                               | 0.218885816                              |
| 0.025992354                                                 | 186.9022556                                     | 133                                               | 0.276507277                              |
| 0.010933745                                                 | 282.4836364                                     | 275                                               | 0.309684685                              |
| 0.007006395                                                 | 304.4900285                                     | 702                                               | 0.218215729                              |
| 0.005670791                                                 | 423.0709617                                     | 1071                                              | 0.300084057                              |
| 0.004582724                                                 | 437.4511873                                     | 758                                               | 0.223532881                              |
| 0.014825335                                                 | 212.1764706                                     | 221                                               | 0.148921833                              |
| 0.013438663                                                 | 201.5587302                                     | 315                                               | 0.192542787                              |
| 0.012871663                                                 | 201.0104167                                     | 384                                               | 0.291793313                              |
| 0.012057571                                                 | 200.8837209                                     | 430                                               | 0.222567288                              |
| 0.007146389                                                 | 306.4082734                                     | 556                                               | 0.183680211                              |
| 0.017977913                                                 | 188.1489899                                     | 396                                               | 0.210191083                              |
| 0.005110041                                                 | 494.627409                                      | 934                                               | 0.267315398                              |
| 0.009246142                                                 | 232.0885936                                     | 903                                               | 0.252587413                              |
| 0.006540008                                                 | 361.7047619                                     | 1038.068571                                       | 0.284861639                              |
| 0.007930419                                                 | 352.4444444                                     | 342                                               | 0.225593668                              |
| 0.022730792                                                 | 136.778626                                      | 131                                               | 0.232269504                              |
| 0.019553146                                                 | 195.701107                                      | 271                                               | 0.248623853                              |
| 0.007232498                                                 | 316.6205882                                     | 680                                               | 0.170682731                              |
| 0.009248986                                                 | 328.0440678                                     | 295                                               | 0.150817996                              |
| 0.008121775                                                 | 270.2149533                                     | 747.0026702                                       | 0.197260996                              |
| 0.006363061                                                 | 388.6397695                                     | 347                                               | 0.296327925                              |
| 0.008619148                                                 | 292.3367037                                     | 987.0020222                                       | 0.251206502                              |
| 0.007447235                                                 | 333.4941176                                     | 595                                               | 0.315148305                              |
| 0.003104236                                                 | 687.1404255                                     | 938.0021277                                       | 0.286672766                              |
| 0.009071528                                                 | 270.9262473                                     | 461                                               | 0.189555921                              |
| 0.007413728                                                 | 356.2711864                                     | 413                                               | 0.301020408                              |
| 0.023089813                                                 | 105.8779343                                     | 213                                               | 0.151601423                              |
| 0.006977901                                                 | 333.6820276                                     | 651                                               | 0.221353281                              |
| 0.004652109                                                 | 467.4496374                                     | 1241                                              | 0.22617095                               |
| 0.007413217                                                 | 340.1459732                                     | 596                                               | 0.262439454                              |
| 0.0088106                                                   | 254.6405959                                     | 537                                               | 0.287473233                              |
| 0.030661179                                                 | 119.4456522                                     | 184                                               | 0.311864407                              |
| 0.007830616                                                 | 292.3390558                                     | 466                                               | 0.302009073                              |
| 0.012822062                                                 | 239.5107143                                     | 280                                               | 0.264650284                              |
| 0.006223686                                                 | 363.1818182                                     | 814                                               | 0.228266966                              |
| 0.01011956                                                  | 244.6457565                                     | 271                                               | 0.209590101                              |
| 0.004549685                                                 | 517.5468053                                     | 673                                               | 0.268448345                              |
| 0.003957806                                                 | 489.695962                                      | 1263                                              | 0.331670168                              |
| 0.00805627                                                  | 323.8453333                                     | 375                                               | 0.181950509                              |
| 0.007524013                                                 | 306.2340792                                     | 1162                                              | 0.248343663                              |
| 0.004727891                                                 | 371.3540414                                     | 1495.001336                                       | 0.229918599                              |
| 0.005372841                                                 | 440.9370805                                     | 1192                                              | 0.279680901                              |
| 0.007048981                                                 | 378.9712                                        | 625                                               | 0.268125268                              |
| 0.014866966                                                 | 253.4052133                                     | 422                                               | 0.179193206                              |
| 0.011530078                                                 | 251.8870968                                     | 372                                               | 0.273730684                              |
| 0.005992124                                                 | 353.4136646                                     | 805                                               | 0.245726496                              |
| 0.006674533                                                 | 327.5148042                                     | 1047                                              | 0.235122389                              |
| 0.005972276                                                 | 672.3342246                                     | 374                                               | 0.274596182                              |
| 0.005507253                                                 | 458.3969555                                     | 854                                               | 0.32141513                               |
| 0.008113837                                                 | 355.7793696                                     | 698                                               | 0.282134196                              |
| 0.028866266                                                 | 104.6857143                                     | 105                                               | 0.200764818                              |
| 0.004200979                                                 | 447.197026                                      | 1074.001859                                       | 0.278612118                              |
| 0.013739224                                                 | 164.8134431                                     | 727.0027435                                       | 0.20984456                               |
| 0.011480169                                                 | 321.4908257                                     | 436                                               | 0.305322129                              |
| 0.006711347                                                 | 311.0210016                                     | 619                                               | 0.20341768                               |
| 0.052469104                                                 | 59.11428571                                     | 105                                               | 0.255474453                              |
| 0.018587889                                                 | 210.0592593                                     | 135                                               | 0.233564014                              |
| 0.00530483                                                  | 347.1047382                                     | 802                                               | 0.249766428                              |
| 0.009696086                                                 | 300.6685237                                     | 359                                               | 0.324886878                              |
| 0.01278886                                                  | 240.2971014                                     | 414                                               | 0.265044814                              |
| 0.005669834                                                 | 373.4246714                                     | 989                                               | 0.227199632                              |
| 0.008702639                                                 | 236.2038934                                     | 974.0020492                                       | 0.207394815                              |
| 0.00670869                                                  | 601.0188679                                     | 424                                               | 0.479638009                              |
| 0.007819551                                                 | 310.814433                                      | 291                                               | 0.165059558                              |
| 0.029559618                                                 | 128.4565217                                     | 92                                                | 0.214953271                              |
| 0.033308354                                                 | 100.1089744                                     | 156                                               | 0.175675676                              |
| 0.008868162                                                 | 380.925144                                      | 521                                               | 0.451473137                              |

| log.sigma.3.5.mm.3D_gldzm_IntensityVariabilityNormalized | log.sigma.3.5.mm.3D_gldzm_LowIntensitySmallDistanceEmphasis | log.sigma.3.5.mm.3D_gldzm_IntensityVariability |
|----------------------------------------------------------|-------------------------------------------------------------|------------------------------------------------|
| 0.04881458                                               | 0.017162767                                                 | 16.25525526                                    |
| 0.058768                                                 | 0.011378498                                                 | 29.384                                         |
| 0.056725838                                              | 0.018476216                                                 | 22.12307692                                    |
| 0.056390071                                              | 0.012828384                                                 | 34.05960265                                    |
| 0.066719264                                              | 0.021300731                                                 | 13.01025641                                    |
| 0.059832743                                              | 0.022136449                                                 | 21.18079096                                    |
| 0.072711111                                              | 0.031095491                                                 | 10.90666667                                    |
| 0.055616427                                              | 0.007983796                                                 | 24.69369369                                    |
| 0.056637301                                              | 0.00871568                                                  | 30.69741697                                    |
| 0.05395138                                               | 0.004581394                                                 | 49.04180418                                    |
| 0.074375411                                              | 0.011014264                                                 | 23.20512821                                    |
| 0.056479182                                              | 0.012965982                                                 | 31.34594595                                    |
| 0.057492087                                              | 0.008424904                                                 | 31.90810811                                    |
| 0.063466046                                              | 0.020634767                                                 | 31.35222672                                    |
| 0.054691066                                              | 0.012428868                                                 | 25.21258134                                    |
| 0.05160612                                               | 0.005032375                                                 | 55.06373008                                    |
| 0.053933518                                              | 0.0087027                                                   | 20.49473684                                    |
| 0.057536679                                              | 0.00696829                                                  | 28.25050916                                    |
| 0.062785467                                              | 0.008469189                                                 | 21.34705882                                    |
| 0.057448521                                              | 0.009208422                                                 | 37.34153846                                    |
| 0.05464262                                               | 0.007528001                                                 | 102.5641982                                    |
| 0.055960331                                              | 0.005765417                                                 | 30.77818182                                    |
| 0.05601358                                               | 0.007565039                                                 | 65.08777969                                    |
| 0.054068346                                              | 0.01587976                                                  | 13.30081301                                    |
| 0.056144931                                              | 0.0113765                                                   | 44.63522013                                    |
| 0.050378078                                              | 0.006399967                                                 | 23.42580645                                    |
| 0.059741264                                              | 0.012439394                                                 | 40.98250729                                    |
| 0.055783476                                              | 0.007691433                                                 | 65.26666667                                    |
| 0.053066667                                              | 0.010377822                                                 | 39.8                                           |
| 0.051636331                                              | 0.006875801                                                 | 45.28506271                                    |
| 0.052565952                                              | 0.005437022                                                 | 54.24806202                                    |
| 0.056008619                                              | 0.006961122                                                 | 72.7551963                                     |
| 0.052620261                                              | 0.006518837                                                 | 29.15162455                                    |
| 0.064277234                                              | 0.025992354                                                 | 8.54887218                                     |
| 0.053963636                                              | 0.010933745                                                 | 14.84                                          |
| 0.056927298                                              | 0.007006395                                                 | 39.96296296                                    |
| 0.046203231                                              | 0.005670791                                                 | 49.48366013                                    |
| 0.057044994                                              | 0.004582724                                                 | 43.24010554                                    |
| 0.06189472                                               | 0.014825335                                                 | 13.67873303                                    |
| 0.05886369                                               | 0.013438663                                                 | 18.54920635                                    |
| 0.060858832                                              | 0.012871663                                                 | 23.36979167                                    |
| 0.061103299                                              | 0.012057571                                                 | 26.2744186                                     |
| 0.059714818                                              | 0.007146389                                                 | 33.20143885                                    |
| 0.054280175                                              | 0.017977913                                                 | 21.49494949                                    |
| 0.044997684                                              | 0.005110041                                                 | 42.02783726                                    |
| 0.061226943                                              | 0.009246142                                                 | 55.28792913                                    |
| 0.051735147                                              | 0.006470288                                                 | 54.32190476                                    |
| 0.052939366                                              | 0.007930419                                                 | 18.10526316                                    |
| 0.084901812                                              | 0.022730792                                                 | 11.12212374                                    |
| 0.059571629                                              | 0.019553146                                                 | 16.14391144                                    |
| 0.056012111                                              | 0.007232498                                                 | 38.08823529                                    |
| 0.061465096                                              | 0.009248986                                                 | 18.13220339                                    |
| 0.058393835                                              | 0.00809623                                                  | 43.73698264                                    |
| 0.058691626                                              | 0.006363061                                                 | 20.36599424                                    |
| 0.055634221                                              | 0.008606028                                                 | 55.02224469                                    |
| 0.049705529                                              | 0.007447235                                                 | 29.57478992                                    |
| 0.047716161                                              | 0.003095994                                                 | 44.85319149                                    |
| 0.056225032                                              | 0.009071528                                                 | 25.9197397                                     |
| 0.057155755                                              | 0.007413728                                                 | 23.60532688                                    |
| 0.089642708                                              | 0.023089813                                                 | 19.09389671                                    |
| 0.055839887                                              | 0.006977901                                                 | 36.35176651                                    |
| 0.051022641                                              | 0.004652109                                                 | 63.3190975                                     |
| 0.054141705                                              | 0.007413217                                                 | 32.26845638                                    |
| 0.060862992                                              | 0.0088106                                                   | 32.68342644                                    |
| 0.066398866                                              | 0.030661179                                                 | 12.2173913                                     |
| 0.056512369                                              | 0.007830616                                                 | 26.33476395                                    |
| 0.050765306                                              | 0.012822062                                                 | 14.21428571                                    |
| 0.049028367                                              | 0.006223686                                                 | 39.90909091                                    |
| 0.068749064                                              | 0.010111956                                                 | 18.63099631                                    |
| 0.048557279                                              | 0.004549685                                                 | 32.67904903                                    |
| 0.048443143                                              | 0.003957806                                                 | 61.18368963                                    |
| 0.059697778                                              | 0.00805627                                                  | 22.38666667                                    |
| 0.0539147                                                | 0.007524013                                                 | 62.64888124                                    |
| 0.057006018                                              | 0.004720952                                                 | 85.33800935                                    |
| 0.047251531                                              | 0.005372841                                                 | 56.3238255                                     |
| 0.0507264                                                | 0.007048981                                                 | 31.704                                         |
| 0.056770962                                              | 0.014866966                                                 | 23.95734597                                    |
| 0.059197595                                              | 0.011530078                                                 | 22.02150538                                    |
| 0.05231434                                               | 0.005992124                                                 | 42.11304348                                    |
| 0.051029503                                              | 0.006674533                                                 | 53.42788921                                    |
| 0.045397352                                              | 0.005972276                                                 | 16.97860963                                    |
| 0.045354826                                              | 0.005507253                                                 | 38.73302108                                    |
| 0.051957701                                              | 0.008113837                                                 | 36.26647564                                    |
| 0.087709751                                              | 0.028866266                                                 | 9.20952381                                     |
| 0.05316227                                               | 0.004176777                                                 | 57.20260223                                    |
| 0.061747212                                              | 0.013675717                                                 | 45.01371742                                    |
| 0.048301911                                              | 0.011480169                                                 | 21.05963303                                    |
| 0.060885633                                              | 0.006711347                                                 | 37.68820679                                    |
| 0.104761905                                              | 0.052469104                                                 | 11                                             |
| 0.061947874                                              | 0.018587889                                                 | 8.362962963                                    |
| 0.059903234                                              | 0.00530483                                                  | 48.04239401                                    |
| 0.051310899                                              | 0.009696086                                                 | 18.42061281                                    |
| 0.057585941                                              | 0.01278886                                                  | 23.84057971                                    |
| 0.052313569                                              | 0.005669834                                                 | 51.73811931                                    |
| 0.059006316                                              | 0.008664217                                                 | 57.59016393                                    |
| 0.035599858                                              | 0.00670869                                                  | 15.09433962                                    |
| 0.070629775                                              | 0.007819551                                                 | 20.5532646                                     |
| 0.073251418                                              | 0.029559618                                                 | 6.739130435                                    |
| 0.071581197                                              | 0.033308354                                                 | 11.16666667                                    |
| 0.043571163                                              | 0.008868162                                                 | 22.70057582                                    |

| log.sigma.3.5.mm.3D_gldzm_HighIntensityLargeDistanceEmphasis | log.sigma.3.5.mm.3D_gldzm_SmallDistanceEmphasis | log.sigma.3.5.mm.3D_gldcm_SumVariance | log.sigma.3.5.mm.3D_gldcm_Homogeneity1 |
|--------------------------------------------------------------|-------------------------------------------------|---------------------------------------|----------------------------------------|
| 252.3333333                                                  | 1                                               | 621.1509051                           | 0.413377884                            |
| 237.614                                                      | 1                                               | 584.422134                            | 0.431903333                            |
| 189.2282051                                                  | 1                                               | 554.6533177                           | 0.3816147                              |
| 224.0562914                                                  | 1                                               | 562.3604225                           | 0.435478785                            |
| 151.0461538                                                  | 1                                               | 287.7246514                           | 0.495963954                            |
| 151.5367232                                                  | 1                                               | 388.0557307                           | 0.452824762                            |
| 122.56                                                       | 1                                               | 216.2712243                           | 0.554617779                            |
| 340.295045                                                   | 1                                               | 968.3155506                           | 0.442284789                            |
| 273.400369                                                   | 1                                               | 777.593045                            | 0.427771786                            |
| 451.0869087                                                  | 0.999174917                                     | 1401.281142                           | 0.392635784                            |
| 211.0512821                                                  | 1                                               | 626.440691                            | 0.489785038                            |
| 227.2342342                                                  | 1                                               | 647.721589                            | 0.391234957                            |
| 266.6972973                                                  | 1                                               | 676.6858285                           | 0.491802974                            |
| 153.791498                                                   | 1                                               | 401.1052663                           | 0.421134292                            |
| 212.0845987                                                  | 1                                               | 621.0771047                           | 0.40268741                             |
| 406.0402999                                                  | 0.997891284                                     | 1200.458214                           | 0.449198341                            |
| 325.1105263                                                  | 1                                               | 1080.284712                           | 0.438017958                            |
| 345.5376782                                                  | 1                                               | 910.900877                            | 0.460422797                            |
| 297.4117647                                                  | 1                                               | 811.8278657                           | 0.411869183                            |
| 261.4153846                                                  | 1                                               | 718.7738301                           | 0.44463128                             |
| 296.938732                                                   | 0.998401705                                     | 918.6531179                           | 0.398535908                            |
| 387.4181818                                                  | 1                                               | 1163.153473                           | 0.417348155                            |
| 274.0757315                                                  | 0.999354561                                     | 794.1397384                           | 0.403407705                            |
| 269.9268293                                                  | 1                                               | 692.4724616                           | 0.443758917                            |
| 219.0779874                                                  | 1                                               | 624.108532                            | 0.386114209                            |
| 454.4365591                                                  | 1                                               | 1375.547121                           | 0.377052836                            |
| 188.548105                                                   | 1                                               | 559.2415903                           | 0.439634566                            |
| 279.3794872                                                  | 1                                               | 911.9197875                           | 0.362176264                            |
| 315.3626667                                                  | 1                                               | 928.8304302                           | 0.437758202                            |
| 343.6214367                                                  | 1                                               | 1067.405509                           | 0.420546822                            |
| 401.9525194                                                  | 1                                               | 1321.471358                           | 0.416899006                            |
| 298.208622                                                   | 1                                               | 861.9798265                           | 0.420827078                            |
| 413.433213                                                   | 1                                               | 1186.390198                           | 0.435332786                            |
| 186.9022556                                                  | 1                                               | 471.0890542                           | 0.455391644                            |
| 282.4836364                                                  | 1                                               | 850.1533552                           | 0.397579775                            |
| 304.4900285                                                  | 1                                               | 910.6225511                           | 0.4471749                              |
| 423.0709617                                                  | 1                                               | 1265.237507                           | 0.382501071                            |
| 437.4511873                                                  | 1                                               | 1437.638796                           | 0.430289101                            |
| 212.1764706                                                  | 1                                               | 521.1580845                           | 0.50794294                             |
| 201.5587302                                                  | 1                                               | 432.1863962                           | 0.467967226                            |
| 201.0104167                                                  | 1                                               | 556.500952                            | 0.412149758                            |
| 200.8837209                                                  | 1                                               | 488.8252807                           | 0.455759343                            |
| 306.4082734                                                  | 1                                               | 887.5506347                           | 0.472158469                            |
| 188.1489899                                                  | 1                                               | 413.7795813                           | 0.467487445                            |
| 494.627409                                                   | 1                                               | 1653.311397                           | 0.408017903                            |
| 232.0885936                                                  | 1                                               | 707.4359874                           | 0.415436488                            |
| 367.787619                                                   | 0.995714286                                     | 1046.798654                           | 0.41146379                             |
| 352.4444444                                                  | 1                                               | 1232.354195                           | 0.42538154                             |
| 136.778626                                                   | 1                                               | 246.3099906                           | 0.491915046                            |
| 195.701107                                                   | 1                                               | 418.8744634                           | 0.471583757                            |
| 316.6205882                                                  | 1                                               | 880.5880515                           | 0.487942178                            |
| 328.0440678                                                  | 1                                               | 993.7478115                           | 0.501804564                            |
| 271                                                          | 0.998998665                                     | 636.9472474                           | 0.468252484                            |
| 388.6397695                                                  | 1                                               | 1241.673774                           | 0.398649585                            |
| 293.2133468                                                  | 0.999241658                                     | 817.4947168                           | 0.411113749                            |
| 333.4941176                                                  | 1                                               | 967.1269901                           | 0.380965755                            |
| 688.6851064                                                  | 0.999202128                                     | 2232.896797                           | 0.402184365                            |
| 270.9262473                                                  | 1                                               | 612.3840114                           | 0.507376303                            |
| 356.2711864                                                  | 1                                               | 1147.173719                           | 0.399748751                            |
| 105.8779343                                                  | 1                                               | 304.9162699                           | 0.485813521                            |
| 333.6820276                                                  | 1                                               | 944.5429762                           | 0.451279084                            |
| 467.4496374                                                  | 1                                               | 1468.509477                           | 0.440126677                            |
| 340.1459732                                                  | 1                                               | 993.0029502                           | 0.418277235                            |
| 254.6405959                                                  | 1                                               | 798.4695017                           | 0.382440055                            |
| 119.4456522                                                  | 1                                               | 340.2938043                           | 0.405859172                            |
| 292.3390558                                                  | 1                                               | 659.1889639                           | 0.405503534                            |
| 239.5107143                                                  | 1                                               | 507.0846984                           | 0.438863801                            |
| 363.1818182                                                  | 1                                               | 995.5274432                           | 0.425105852                            |
| 244.6457565                                                  | 1                                               | 834.4153017                           | 0.450639124                            |
| 517.5468053                                                  | 1                                               | 1608.627652                           | 0.413647495                            |
| 489.695962                                                   | 1                                               | 1526.165383                           | 0.372485084                            |
| 323.8453333                                                  | 1                                               | 824.8487747                           | 0.461912986                            |
| 306.2340792                                                  | 1                                               | 841.9576701                           | 0.430372169                            |
| 372.0774883                                                  | 0.999498998                                     | 1213.202236                           | 0.41599728                             |
| 440.9370805                                                  | 1                                               | 1254.676397                           | 0.403104787                            |
| 378.9712                                                     | 1                                               | 1190.848866                           | 0.408552944                            |
| 253.4052133                                                  | 1                                               | 761.0671883                           | 0.467693069                            |
| 251.8870968                                                  | 1                                               | 718.9277802                           | 0.411782879                            |
| 353.4136646                                                  | 1                                               | 1157.609031                           | 0.407327799                            |
| 327.5148042                                                  | 1                                               | 1058.318242                           | 0.433728227                            |
| 672.3342246                                                  | 1                                               | 2291.533802                           | 0.413602523                            |
| 458.3969555                                                  | 1                                               | 1471.919387                           | 0.375204821                            |
| 355.7793696                                                  | 1                                               | 999.7217557                           | 0.400839908                            |
| 104.6857143                                                  | 1                                               | 180.8561265                           | 0.522422146                            |
| 447.598513                                                   | 0.999302974                                     | 1385.025991                           | 0.400751395                            |
| 165.1467764                                                  | 0.998971193                                     | 393.6312064                           | 0.455992507                            |
| 321.4908257                                                  | 1                                               | 903.4915784                           | 0.405809668                            |
| 311.0210016                                                  | 1                                               | 889.9355028                           | 0.444279773                            |
| 59.11428571                                                  | 1                                               | 132.0299175                           | 0.459141728                            |
| 210.0592593                                                  | 1                                               | 625.1430293                           | 0.464120868                            |
| 347.1047382                                                  | 1                                               | 960.5473109                           | 0.428578889                            |
| 300.6685237                                                  | 1                                               | 931.0055475                           | 0.387261938                            |
| 240.2971014                                                  | 1                                               | 779.2796426                           | 0.42055531                             |
| 373.4246714                                                  | 1                                               | 1129.464185                           | 0.430709935                            |
| 236.5112705                                                  | 0.999231557                                     | 624.7996558                           | 0.45666559                             |
| 601.0188679                                                  | 1                                               | 1993.343224                           | 0.285576752                            |
| 310.814433                                                   | 1                                               | 906.4835591                           | 0.499257695                            |
| 128.4565217                                                  | 1                                               | 261.9542235                           | 0.476909427                            |
| 100.1089744                                                  | 1                                               | 210.7359053                           | 0.522395701                            |
| 380.925144                                                   | 1                                               | 1250.161435                           | 0.313419919                            |

| log.sigma.3.5.mm.3D_glc_m_Homogeneity2 | log.sigma.3.5.mm.3D_glc_m_ClusterShade | log.sigma.3.5.mm.3D_glc_m_MaximumProbability | log.sigma.3.5.mm.3D_glc_m_Idmn | log.sigma.3.5.mm.3D_glc_m_SumVariance2 |
|----------------------------------------|----------------------------------------|----------------------------------------------|--------------------------------|----------------------------------------|
| 0.336745787                            | 264.1686149                            | 0.029051238                                  | 0.984532415                    | 81.08740024                            |
| 0.35663353                             | 130.2555512                            | 0.03464161                                   | 0.986588034                    | 54.3157391                             |
| 0.298256028                            | -132.7064095                           | 0.024127646                                  | 0.979338721                    | 62.33337737                            |
| 0.359697954                            | 136.7175755                            | 0.039322368                                  | 0.988697111                    | 50.25593974                            |
| 0.434801642                            | 265.7964211                            | 0.068947596                                  | 0.984743616                    | 46.62483921                            |
| 0.381096111                            | 141.2047319                            | 0.040313097                                  | 0.985494579                    | 40.90856924                            |
| 0.506287644                            | 184.3766098                            | 0.114372386                                  | 0.988575928                    | 35.11668211                            |
| 0.369530217                            | 102.225483                             | 0.034377668                                  | 0.991558589                    | 60.75446884                            |
| 0.352832077                            | 147.9975355                            | 0.028972688                                  | 0.986475042                    | 59.65912271                            |
| 0.308994798                            | -72.52320002                           | 0.024004172                                  | 0.989676987                    | 61.51857473                            |
| 0.426617793                            | 54.36368473                            | 0.046043124                                  | 0.98823122                     | 31.7648866                             |
| 0.307588928                            | -64.7030979                            | 0.020282296                                  | 0.982472904                    | 54.59128361                            |
| 0.429414004                            | 110.7115997                            | 0.057257203                                  | 0.992079624                    | 35.00184837                            |
| 0.341765002                            | -36.97026275                           | 0.023448022                                  | 0.983611544                    | 44.05090827                            |
| 0.324286305                            | 368.888882                             | 0.021426327                                  | 0.982776424                    | 69.0963886                             |
| 0.378824759                            | -36.15303185                           | 0.074473025                                  | 0.990287486                    | 65.2741441                             |
| 0.365273644                            | -179.6312039                           | 0.035810637                                  | 0.98968385                     | 50.81606125                            |
| 0.391311124                            | 132.6231886                            | 0.042313914                                  | 0.992297227                    | 49.88204296                            |
| 0.332084066                            | 15.21973548                            | 0.025463323                                  | 0.985287803                    | 47.27132092                            |
| 0.371167734                            | -18.32149183                           | 0.0366566                                    | 0.987783846                    | 52.66205591                            |
| 0.317422442                            | -157.9710865                           | 0.021949995                                  | 0.988937072                    | 55.43785071                            |
| 0.338359799                            | 36.3226298                             | 0.024906224                                  | 0.993113139                    | 55.9792958                             |
| 0.32186769                             | 31.58995202                            | 0.024774474                                  | 0.986884215                    | 59.7301675                             |
| 0.370459145                            | 58.42715243                            | 0.044267115                                  | 0.986860129                    | 65.4332869                             |
| 0.302471953                            | -169.2929122                           | 0.016935142                                  | 0.980958254                    | 69.10459114                            |
| 0.293380097                            | 77.80942964                            | 0.023015828                                  | 0.984917675                    | 72.83231659                            |
| 0.364363577                            | 150.4593981                            | 0.032863394                                  | 0.988627286                    | 54.08243075                            |
| 0.27407953                             | -240.7412247                           | 0.01699049                                   | 0.983063801                    | 61.4689591                             |
| 0.363591282                            | -121.7281723                           | 0.042037783                                  | 0.988779002                    | 48.31937147                            |
| 0.344247518                            | -4.735432497                           | 0.031954948                                  | 0.989767289                    | 48.44656349                            |
| 0.339266275                            | -238.0073863                           | 0.021233742                                  | 0.989940844                    | 58.9293395                             |
| 0.342734876                            | 26.35990583                            | 0.02165292                                   | 0.990016668                    | 54.25819632                            |
| 0.360466806                            | -181.5478419                           | 0.038486459                                  | 0.991121249                    | 60.22580824                            |
| 0.386914741                            | 239.0867435                            | 0.071293693                                  | 0.979467869                    | 56.51015032                            |
| 0.317890008                            | -164.9820871                           | 0.028326438                                  | 0.980961361                    | 60.56384631                            |
| 0.375672515                            | 8.85540969                             | 0.042020495                                  | 0.989245827                    | 42.4763836                             |
| 0.299034655                            | -89.70683033                           | 0.021035471                                  | 0.986565969                    | 76.37819538                            |
| 0.354192096                            | -81.13034157                           | 0.032010804                                  | 0.990640463                    | 42.42737579                            |
| 0.448006148                            | 65.73662729                            | 0.053967519                                  | 0.990952447                    | 31.05534929                            |
| 0.399633825                            | 259.393653                             | 0.04966646                                   | 0.988645542                    | 49.51635154                            |
| 0.331873158                            | 23.85547941                            | 0.029510971                                  | 0.982015747                    | 37.95562329                            |
| 0.385423803                            | 116.1113055                            | 0.037057212                                  | 0.987342762                    | 41.64316493                            |
| 0.405156667                            | 94.66146304                            | 0.044875368                                  | 0.990643772                    | 41.74378972                            |
| 0.400791221                            | 286.8327766                            | 0.048487481                                  | 0.987499048                    | 47.4270163                             |
| 0.332140382                            | -268.4408346                           | 0.02800351                                   | 0.98730231                     | 76.99676171                            |
| 0.335279761                            | -106.6394323                           | 0.018344973                                  | 0.987962519                    | 60.01906467                            |
| 0.333393345                            | -82.54569737                           | 0.024584587                                  | 0.99031042                     | 63.26428605                            |
| 0.351323107                            | -393.3566997                           | 0.040660488                                  | 0.986600849                    | 51.1617289                             |
| 0.43089476                             | 137.1894457                            | 0.071798037                                  | 0.980275767                    | 42.33325484                            |
| 0.406059361                            | 346.0799219                            | 0.055507339                                  | 0.990193055                    | 52.10929661                            |
| 0.42453176                             | 92.599512                              | 0.051423377                                  | 0.992020449                    | 43.3845991                             |
| 0.442372426                            | -51.89700909                           | 0.07739288                                   | 0.990960134                    | 29.47026251                            |
| 0.400201973                            | 231.2525494                            | 0.039364304                                  | 0.991124882                    | 50.18020906                            |
| 0.317299733                            | 64.48699822                            | 0.023179877                                  | 0.987018157                    | 47.33804329                            |
| 0.330712196                            | 3.06151096                             | 0.025539549                                  | 0.988039893                    | 55.63275752                            |
| 0.298522736                            | -3.802481236                           | 0.02195266                                   | 0.98489094                     | 68.9942269                             |
| 0.322442998                            | -208.616438                            | 0.032385587                                  | 0.991870451                    | 72.92312495                            |
| 0.450191053                            | 350.4036867                            | 0.078609566                                  | 0.990786634                    | 50.22387827                            |
| 0.318996922                            | -170.0951192                           | 0.029159807                                  | 0.984365065                    | 53.23781871                            |
| 0.421102535                            | -20.99734428                           | 0.042734849                                  | 0.982785404                    | 19.68626526                            |
| 0.379902109                            | 67.74874547                            | 0.038034269                                  | 0.989310516                    | 59.35193606                            |
| 0.368644336                            | -186.3339845                           | 0.040722586                                  | 0.993266049                    | 57.98399952                            |
| 0.341032858                            | -85.92301485                           | 0.026931133                                  | 0.987313793                    | 54.56295292                            |
| 0.295818806                            | -130.0808859                           | 0.016053648                                  | 0.981562166                    | 51.67305558                            |
| 0.325498592                            | 21.64041469                            | 0.026146938                                  | 0.97362667                     | 42.81239118                            |
| 0.325580825                            | 436.5442412                            | 0.030281158                                  | 0.986540103                    | 74.2129608                             |
| 0.365405684                            | 553.2031799                            | 0.042150645                                  | 0.987203369                    | 72.94395257                            |
| 0.349351203                            | 159.8938475                            | 0.025193263                                  | 0.988432884                    | 64.75200126                            |
| 0.379261881                            | -26.05884738                           | 0.032415127                                  | 0.986952418                    | 42.68222282                            |
| 0.336744879                            | -27.16050863                           | 0.028829749                                  | 0.991809414                    | 66.13135317                            |
| 0.288239589                            | -311.8872423                           | 0.013980227                                  | 0.986848489                    | 92.7812026                             |
| 0.39413079                             | 211.1177206                            | 0.04036722                                   | 0.990515134                    | 43.69882187                            |
| 0.354802183                            | -36.98623223                           | 0.028636871                                  | 0.989997762                    | 61.22840937                            |
| 0.336885002                            | -135.8595647                           | 0.023525067                                  | 0.990190964                    | 45.71120907                            |
| 0.322771484                            | 94.47121037                            | 0.022115056                                  | 0.991042381                    | 81.93466625                            |
| 0.330660403                            | -20.75185107                           | 0.0342681                                    | 0.99027824                     | 65.88227039                            |
| 0.400684838                            | -37.87605497                           | 0.038675247                                  | 0.989680825                    | 36.97153008                            |
| 0.332117191                            | -39.01407134                           | 0.027060896                                  | 0.985389568                    | 50.98799993                            |
| 0.327572838                            | -146.3678734                           | 0.029237044                                  | 0.987431371                    | 52.22672371                            |
| 0.360786841                            | -231.4754874                           | 0.033890989                                  | 0.988369419                    | 54.84044362                            |
| 0.339335682                            | -348.5507628                           | 0.032230156                                  | 0.989038627                    | 73.53574454                            |
| 0.292684438                            | -270.9380822                           | 0.019592671                                  | 0.985759545                    | 81.42698599                            |
| 0.319029917                            | 69.61867008                            | 0.024883341                                  | 0.987577269                    | 59.52836808                            |
| 0.468486676                            | 112.9013665                            | 0.079371831                                  | 0.981096851                    | 28.35831458                            |
| 0.318753752                            | -132.0508038                           | 0.022042326                                  | 0.98874667                     | 62.59551233                            |
| 0.384506244                            | 163.9788313                            | 0.028570814                                  | 0.987480655                    | 47.13688124                            |
| 0.326436561                            | -14.12906532                           | 0.030400819                                  | 0.985893634                    | 75.22995285                            |
| 0.370196632                            | 74.36129666                            | 0.035885054                                  | 0.990352885                    | 45.30932989                            |
| 0.387871515                            | 8.924589373                            | 0.048158442                                  | 0.961425739                    | 24.72456781                            |
| 0.396853683                            | -21.63292918                           | 0.06817094                                   | 0.985226776                    | 47.04073915                            |
| 0.352246655                            | 165.6878678                            | 0.031577452                                  | 0.989034176                    | 50.75441393                            |
| 0.303767037                            | -56.55764343                           | 0.02380048                                   | 0.983119309                    | 58.92039264                            |
| 0.342114193                            | -207.9630771                           | 0.030127056                                  | 0.983654886                    | 46.11259949                            |
| 0.355636586                            | -87.83639323                           | 0.034474767                                  | 0.989480467                    | 47.64252953                            |
| 0.385432865                            | 46.86705902                            | 0.027770494                                  | 0.989932853                    | 43.19157603                            |
| 0.197436188                            | -1303.048881                           | 0.014250068                                  | 0.974972206                    | 169.5037172                            |
| 0.43802884                             | 36.14618032                            | 0.058882641                                  | 0.991524411                    | 31.96779198                            |
| 0.410949327                            | 143.982156                             | 0.059428917                                  | 0.98325505                     | 45.13846022                            |
| 0.465852978                            | 95.939284                              | 0.10408641                                   | 0.985689942                    | 28.1637987                             |
| 0.221409644                            | -491.6875756                           | 0.011823524                                  | 0.97681177                     | 116.3878882                            |

| log.sigma.3.5.mm.3D_glc_m_Contrast | log.sigma.3.5.mm.3D_glc_m_DifferenceEntropy | log.sigma.3.5.mm.3D_glc_m_InverseVariance | log.sigma.3.5.mm.3D_glc_m_Entropy | log.sigma.3.5.mm.3D_glc_m_Dissimilarity |
|------------------------------------|---------------------------------------------|-------------------------------------------|-----------------------------------|-----------------------------------------|
| 15.05046971                        | 3.020489801                                 | 0.328986286                               | 7.601931421                       | 2.77068594                              |
| 11.13580416                        | 2.874054406                                 | 0.341668752                               | 7.328058669                       | 2.449822474                             |
| 16.26276382                        | 3.110033192                                 | 0.302008026                               | 7.654080414                       | 3.032075721                             |
| 10.00235585                        | 2.792928612                                 | 0.349176575                               | 7.271615722                       | 2.337074035                             |
| 7.291978355                        | 2.546501499                                 | 0.395272988                               | 6.465620867                       | 1.894572001                             |
| 8.90558463                         | 2.723967578                                 | 0.363627499                               | 6.970920366                       | 2.190200138                             |
| 4.350763732                        | 2.23793894                                  | 0.42831394                                | 5.879508482                       | 1.458194517                             |
| 10.23080215                        | 2.781721538                                 | 0.365579311                               | 7.248722473                       | 2.301859627                             |
| 12.15362063                        | 2.901219947                                 | 0.347819425                               | 7.457891846                       | 2.512653063                             |
| 13.14082236                        | 2.97745995                                  | 0.316128131                               | 7.683099103                       | 2.759124293                             |
| 6.580084498                        | 2.515461235                                 | 0.400980699                               | 6.619608847                       | 1.854200426                             |
| 13.67441711                        | 2.991649678                                 | 0.314415651                               | 7.586171981                       | 2.797441747                             |
| 6.928789331                        | 2.555544837                                 | 0.39785407                                | 6.696865133                       | 1.879098779                             |
| 10.00367175                        | 2.804214331                                 | 0.338406674                               | 7.260637054                       | 2.413383028                             |
| 16.87454724                        | 3.06810171                                  | 0.318436123                               | 7.704904533                       | 2.929702508                             |
| 13.98976969                        | 2.990388556                                 | 0.323134876                               | 7.548293185                       | 2.587177205                             |
| 11.12279428                        | 2.828857323                                 | 0.357943898                               | 7.170206681                       | 2.400023275                             |
| 8.678833369                        | 2.697878131                                 | 0.373682666                               | 7.073921689                       | 2.143327676                             |
| 12.29186296                        | 2.892037887                                 | 0.330918442                               | 7.23976087                        | 2.599558632                             |
| 9.40185837                         | 2.753495984                                 | 0.360493142                               | 7.277460336                       | 2.252055457                             |
| 14.19498385                        | 3.025224751                                 | 0.32002307                                | 7.700425292                       | 2.795484247                             |
| 11.35129561                        | 2.860309613                                 | 0.338891951                               | 7.413416821                       | 2.507843114                             |
| 12.41703334                        | 2.942727737                                 | 0.324135976                               | 7.667843306                       | 2.659438487                             |
| 10.08705984                        | 2.775223706                                 | 0.344239026                               | 7.1472155                         | 2.342800583                             |
| 14.83312038                        | 3.064996898                                 | 0.301895896                               | 7.854440301                       | 2.930300647                             |
| 18.60186687                        | 3.184385954                                 | 0.295318757                               | 7.794334697                       | 3.174144574                             |
| 9.354678025                        | 2.757170974                                 | 0.35073672                                | 7.28631404                        | 2.281397473                             |
| 17.26749465                        | 3.159628366                                 | 0.281535928                               | 7.870383766                       | 3.196120127                             |
| 11.39988201                        | 2.851338701                                 | 0.342889825                               | 7.218027637                       | 2.430466341                             |
| 14.00329821                        | 2.981811737                                 | 0.333180428                               | 7.416996468                       | 2.662493183                             |
| 12.98915866                        | 2.9362635                                   | 0.341087243                               | 7.567721433                       | 2.597717955                             |
| 11.36620742                        | 2.873299168                                 | 0.340287114                               | 7.524234341                       | 2.493633806                             |
| 10.74717088                        | 2.812279726                                 | 0.353528089                               | 7.287802593                       | 2.374098396                             |
| 13.51440707                        | 2.834194906                                 | 0.3457398                                 | 6.671063802                       | 2.476395098                             |
| 16.38267988                        | 3.062893703                                 | 0.319161356                               | 7.467272195                       | 2.920177058                             |
| 10.19203914                        | 2.797076821                                 | 0.362029296                               | 7.160231384                       | 2.300803725                             |
| 17.44392285                        | 3.162032966                                 | 0.293962926                               | 7.963346616                       | 3.089538698                             |
| 10.64280925                        | 2.833740152                                 | 0.349033851                               | 7.193424658                       | 2.400198236                             |
| 5.421712747                        | 2.392638594                                 | 0.410035674                               | 6.426727978                       | 1.696476947                             |
| 8.078480305                        | 2.657919368                                 | 0.375341811                               | 6.930845242                       | 2.067274994                             |
| 11.07694388                        | 2.861955967                                 | 0.334751056                               | 7.175720283                       | 2.524898793                             |
| 9.08520525                         | 2.724478762                                 | 0.369311479                               | 7.045007384                       | 2.185208906                             |
| 8.27482358                         | 2.659575117                                 | 0.380338288                               | 6.954517149                       | 2.052554109                             |
| 9.919583271                        | 2.711673919                                 | 0.379837621                               | 6.888177525                       | 2.163918549                             |
| 19.73915062                        | 3.169202069                                 | 0.311219125                               | 7.909996081                       | 3.066001759                             |
| 10.59269309                        | 2.845224743                                 | 0.336683103                               | 7.577444244                       | 2.473548092                             |
| 13.89164912                        | 2.992217919                                 | 0.331629513                               | 7.64925789                        | 2.702554511                             |
| 13.81873702                        | 2.94924973                                  | 0.348300924                               | 7.166893918                       | 2.617650047                             |
| 6.936780597                        | 2.486090153                                 | 0.400563565                               | 6.184672294                       | 1.898600083                             |
| 8.691498758                        | 2.67305035                                  | 0.385955926                               | 6.743335972                       | 2.088386154                             |
| 7.551833589                        | 2.583389721                                 | 0.394396567                               | 6.843030899                       | 1.924299951                             |
| 8.13429586                         | 2.580694644                                 | 0.397439582                               | 6.405526504                       | 1.909181122                             |
| 7.796124143                        | 2.630093478                                 | 0.384838502                               | 7.050324927                       | 2.02829531                              |
| 14.36064702                        | 2.951201723                                 | 0.331625947                               | 7.362143321                       | 2.745727139                             |
| 12.07754241                        | 2.921333308                                 | 0.326139126                               | 7.560455214                       | 2.598575556                             |
| 17.48489674                        | 3.149616751                                 | 0.302046919                               | 7.863132819                       | 3.104965253                             |
| 16.52538281                        | 3.073541696                                 | 0.317060712                               | 7.73869128                        | 2.884340213                             |
| 8.15936094                         | 2.617561997                                 | 0.391363798                               | 6.631085889                       | 1.935343368                             |
| 14.06863011                        | 3.003642906                                 | 0.323949924                               | 7.435688757                       | 2.773994045                             |
| 5.312663847                        | 2.385591966                                 | 0.417924277                               | 6.273343205                       | 1.746546428                             |
| 10.18013937                        | 2.795553451                                 | 0.357739996                               | 7.348204314                       | 2.280687648                             |
| 12.96329375                        | 2.915397537                                 | 0.352532396                               | 7.417216734                       | 2.499286915                             |
| 12.97884922                        | 2.931415984                                 | 0.338056704                               | 7.47431057                        | 2.605271525                             |
| 13.2579282                         | 2.968173288                                 | 0.303202812                               | 7.552448842                       | 2.824940292                             |
| 12.9248496                         | 2.908260088                                 | 0.325167095                               | 7.117615952                       | 2.682513162                             |
| 13.74548309                        | 2.987649903                                 | 0.325382987                               | 7.495765215                       | 2.726109799                             |
| 10.67364568                        | 2.822990007                                 | 0.352842617                               | 7.20714208                        | 2.374592362                             |
| 12.57528198                        | 2.920740782                                 | 0.344637034                               | 7.597669675                       | 2.543242855                             |
| 9.406498482                        | 2.726720028                                 | 0.369467137                               | 7.023746408                       | 2.218360834                             |
| 14.37410451                        | 3.008520161                                 | 0.331765871                               | 7.639137826                       | 2.724802958                             |
| 18.94934992                        | 3.217633046                                 | 0.286650271                               | 8.225715064                       | 3.245811229                             |
| 9.080658452                        | 2.655756801                                 | 0.390629643                               | 6.817883386                       | 2.118370462                             |
| 11.40947401                        | 2.878259052                                 | 0.342902625                               | 7.535739848                       | 2.462702373                             |
| 11.837409                          | 2.901625021                                 | 0.334512869                               | 7.423732602                       | 2.549832007                             |
| 15.02663883                        | 3.038046274                                 | 0.320051593                               | 7.886471758                       | 2.800763601                             |
| 14.7163961                         | 3.021690064                                 | 0.330483855                               | 7.574468116                       | 2.767115748                             |
| 9.202991269                        | 2.70126121                                  | 0.379552303                               | 6.881739703                       | 2.130401283                             |
| 11.24713767                        | 2.85364289                                  | 0.338093675                               | 7.321301856                       | 2.537929113                             |
| 13.59344084                        | 2.975823847                                 | 0.323370345                               | 7.496048062                       | 2.715826891                             |
| 12.61291011                        | 2.925791296                                 | 0.348353116                               | 7.401296521                       | 2.524857694                             |
| 19.78609027                        | 3.131903994                                 | 0.328310484                               | 7.474817359                       | 2.994340238                             |
| 20.78873057                        | 3.25761879                                  | 0.291681476                               | 7.990845308                       | 3.31088234                              |
| 13.41454313                        | 2.99081213                                  | 0.317579337                               | 7.619570274                       | 2.734541309                             |
| 6.106658738                        | 2.355520016                                 | 0.422549597                               | 5.826612016                       | 1.695302714                             |
| 12.85378171                        | 2.958276135                                 | 0.32441772                                | 7.698046171                       | 2.686856897                             |
| 8.296902931                        | 2.681502528                                 | 0.371896196                               | 7.170100666                       | 2.117014626                             |
| 14.53854728                        | 3.012356852                                 | 0.325448157                               | 7.6316683                         | 2.76452146                              |
| 9.088167585                        | 2.72613152                                  | 0.360962889                               | 7.111299321                       | 2.224826251                             |
| 7.450119549                        | 2.381609655                                 | 0.371209257                               | 6.00448051                        | 2.062291092                             |
| 9.097576352                        | 2.690778063                                 | 0.376205983                               | 6.667969542                       | 2.162615709                             |
| 11.03843695                        | 2.872820711                                 | 0.340804661                               | 7.372826514                       | 2.453274688                             |
| 15.19191262                        | 3.055160911                                 | 0.30746383                                | 7.5585876                         | 2.918208149                             |
| 11.82315696                        | 2.906702336                                 | 0.328472022                               | 7.245986112                       | 2.546009788                             |
| 11.32599384                        | 2.860382408                                 | 0.349677567                               | 7.292275925                       | 2.445308043                             |
| 8.272148161                        | 2.677256867                                 | 0.372261033                               | 7.159217965                       | 2.114827917                             |
| 48.06743534                        | 3.807209185                                 | 0.203937277                               | 8.54639748                        | 5.259636912                             |
| 5.977938223                        | 2.45915312                                  | 0.408313636                               | 6.388872221                       | 1.768598526                             |
| 6.493569501                        | 2.414795072                                 | 0.402145482                               | 6.415436424                       | 1.891547259                             |
| 5.543502752                        | 2.397447402                                 | 0.406611524                               | 6.164003137                       | 1.666155379                             |
| 29.02681216                        | 3.489750649                                 | 0.228764901                               | 8.381778804                       | 4.155609673                             |

| log.sigma.3.5.mm.3D_glcm_DifferenceVariance | log.sigma.3.5.mm.3D_glcm_Idn | log.sigma.3.5.mm.3D_glcm_Idm | log.sigma.3.5.mm.3D_glcm_Correlation | log.sigma.3.5.mm.3D_glcm_Autocorrelation |
|---------------------------------------------|------------------------------|------------------------------|--------------------------------------|------------------------------------------|
| 7.146957647                                 | 0.921051928                  | 0.336745787                  | 0.6861416                            | 216.9927627                              |
| 5.003788229                                 | 0.924208136                  | 0.35663353                   | 0.656232936                          | 204.5096168                              |
| 6.830537857                                 | 0.905496258                  | 0.298256028                  | 0.586861403                          | 195.3512173                              |
| 4.38850538                                  | 0.92934268                   | 0.359697954                  | 0.667401556                          | 198.0504896                              |
| 3.54506498                                  | 0.923004792                  | 0.434801642                  | 0.724521504                          | 110.0141167                              |
| 3.986057558                                 | 0.921372441                  | 0.381096111                  | 0.638966341                          | 142.8436846                              |
| 2.095985083                                 | 0.93323788                   | 0.506287644                  | 0.768687653                          | 85.66512783                              |
| 4.82190234                                  | 0.939770548                  | 0.369530217                  | 0.709452059                          | 319.1188162                              |
| 5.717505461                                 | 0.925132533                  | 0.352832077                  | 0.661475681                          | 263.0366529                              |
| 5.328549547                                 | 0.930290899                  | 0.308994798                  | 0.647807345                          | 444.1543045                              |
| 3.04206741                                  | 0.929686054                  | 0.426617793                  | 0.656120361                          | 213.9812223                              |
| 5.624720253                                 | 0.911587589                  | 0.307588928                  | 0.598561377                          | 223.9097009                              |
| 3.307364096                                 | 0.942223433                  | 0.429414004                  | 0.665974144                          | 229.4737789                              |
| 4.030755331                                 | 0.913694264                  | 0.341765002                  | 0.628808653                          | 148.0988306                              |
| 7.819861236                                 | 0.91721726                   | 0.324286305                  | 0.606976523                          | 215.9771998                              |
| 7.047772113                                 | 0.938593763                  | 0.378824759                  | 0.649687884                          | 386.0550523                              |
| 5.160342391                                 | 0.934062902                  | 0.365273644                  | 0.638183721                          | 349.0642342                              |
| 3.931646714                                 | 0.941898779                  | 0.391311124                  | 0.702762968                          | 301.006975                               |
| 5.18499393                                  | 0.919967364                  | 0.332084066                  | 0.587648645                          | 271.0685228                              |
| 4.204123                                    | 0.927281231                  | 0.371167734                  | 0.69577696                           | 245.4469691                              |
| 6.172812512                                 | 0.929849799                  | 0.317422442                  | 0.592922717                          | 303.9573061                              |
| 4.858913092                                 | 0.943464189                  | 0.338359799                  | 0.663637547                          | 375.3302211                              |
| 5.158691784                                 | 0.922832181                  | 0.32186769                   | 0.656044684                          | 268.8334381                              |
| 4.287947228                                 | 0.924709692                  | 0.370459145                  | 0.730752428                          | 237.8751216                              |
| 5.999479388                                 | 0.907931257                  | 0.302471953                  | 0.645775132                          | 217.9221127                              |
| 8.25842477                                  | 0.919739368                  | 0.293380097                  | 0.594316451                          | 436.2797245                              |
| 4.01788621                                  | 0.928527455                  | 0.364363577                  | 0.701522831                          | 197.84725                                |
| 6.76573688                                  | 0.911615783                  | 0.27407953                   | 0.563228915                          | 301.9518555                              |
| 5.236053415                                 | 0.931429324                  | 0.363591282                  | 0.61952207                           | 305.2045629                              |
| 6.67947717                                  | 0.935018911                  | 0.344247518                  | 0.553312401                          | 344.9077595                              |
| 6.069504717                                 | 0.934618707                  | 0.339266275                  | 0.638592539                          | 420.6426913                              |
| 4.967045148                                 | 0.933240197                  | 0.342734876                  | 0.651987445                          | 288.136806                               |
| 4.903033066                                 | 0.938017702                  | 0.360466806                  | 0.696703132                          | 381.0122548                              |
| 6.845376509                                 | 0.914538073                  | 0.386914741                  | 0.609750789                          | 166.6408882                              |
| 7.490907123                                 | 0.912137788                  | 0.317890008                  | 0.579128937                          | 283.0527503                              |
| 4.778847491                                 | 0.932741667                  | 0.375672515                  | 0.6100981                            | 299.6269666                              |
| 7.629059856                                 | 0.923455205                  | 0.299034655                  | 0.627717709                          | 406.2924739                              |
| 4.751664785                                 | 0.935537498                  | 0.354192096                  | 0.598978199                          | 449.4751405                              |
| 2.412008037                                 | 0.937318404                  | 0.448006148                  | 0.697360153                          | 182.4828857                              |
| 3.680639994                                 | 0.930446649                  | 0.399633825                  | 0.714047034                          | 157.3073615                              |
| 4.546969                                    | 0.910379352                  | 0.331873158                  | 0.54579199                           | 194.1951513                              |
| 4.188930259                                 | 0.927014457                  | 0.385423803                  | 0.635004373                          | 174.3464789                              |
| 3.956151818                                 | 0.937468051                  | 0.405156667                  | 0.66926512                           | 292.5200946                              |
| 5.058576298                                 | 0.930750857                  | 0.400791221                  | 0.647415126                          | 150.5132894                              |
| 9.879170301                                 | 0.930356428                  | 0.332140382                  | 0.58993948                           | 515.9913397                              |
| 4.34472869                                  | 0.92528529                   | 0.335279761                  | 0.699046212                          | 243.6226644                              |
| 6.363819144                                 | 0.935489499                  | 0.333393345                  | 0.641637734                          | 342.1170324                              |
| 6.779206257                                 | 0.927194363                  | 0.351323107                  | 0.574566234                          | 389.8486019                              |
| 3.036347128                                 | 0.911495534                  | 0.43089476                   | 0.715943288                          | 96.280267                                |
| 4.224351045                                 | 0.936607991                  | 0.406059361                  | 0.712418671                          | 152.3626763                              |
| 3.75462794                                  | 0.942913543                  | 0.42453176                   | 0.702128842                          | 290.5434899                              |
| 4.362330722                                 | 0.942093093                  | 0.442372426                  | 0.569309186                          | 317.2780482                              |
| 3.58079423                                  | 0.937908246                  | 0.400201973                  | 0.729899059                          | 220.2604149                              |
| 6.442221889                                 | 0.925554033                  | 0.317299733                  | 0.538460947                          | 394.8424039                              |
| 5.159419017                                 | 0.926670121                  | 0.330712196                  | 0.643160459                          | 275.0179924                              |
| 7.513916401                                 | 0.919044747                  | 0.298522736                  | 0.597902894                          | 319.3400019                              |
| 7.897694699                                 | 0.94163356                   | 0.322442998                  | 0.631275661                          | 677.8871257                              |
| 4.283968251                                 | 0.94134213                   | 0.450191053                  | 0.720449228                          | 209.9719387                              |
| 6.175056676                                 | 0.917922993                  | 0.318996922                  | 0.581893395                          | 368.7746079                              |
| 2.179104497                                 | 0.912220249                  | 0.421102535                  | 0.575978867                          | 114.3356691                              |
| 4.857432576                                 | 0.933356214                  | 0.379902109                  | 0.707040281                          | 312.6439727                              |
| 6.536990211                                 | 0.947852658                  | 0.368644336                  | 0.633682505                          | 461.1757439                              |
| 5.947562591                                 | 0.927029327                  | 0.341032858                  | 0.617492372                          | 325.4399583                              |
| 5.015833579                                 | 0.907338107                  | 0.295818806                  | 0.592635722                          | 268.3372585                              |
| 5.250963535                                 | 0.894868746                  | 0.325498592                  | 0.539430231                          | 127.2082456                              |
| 6.110843551                                 | 0.923804878                  | 0.325580825                  | 0.687148376                          | 227.3094702                              |
| 4.917515809                                 | 0.926381005                  | 0.365405684                  | 0.741440346                          | 181.0221236                              |
| 5.965921712                                 | 0.930639737                  | 0.349351203                  | 0.674508494                          | 327.9316485                              |
| 4.350277086                                 | 0.926061688                  | 0.379261881                  | 0.635011709                          | 277.4967681                              |
| 6.735815547                                 | 0.940794411                  | 0.336744879                  | 0.641273806                          | 502.8324566                              |
| 8.089819733                                 | 0.923765185                  | 0.288239589                  | 0.661574902                          | 483.4931894                              |
| 4.438253708                                 | 0.937732002                  | 0.39413079                   | 0.651545577                          | 272.9713715                              |
| 5.186418781                                 | 0.934180794                  | 0.354802183                  | 0.685410882                          | 282.9532306                              |
| 5.145779482                                 | 0.933662518                  | 0.336885002                  | 0.588566743                          | 387.1537606                              |
| 6.988280988                                 | 0.93788811                   | 0.322771484                  | 0.68931984                           | 404.8635733                              |
| 6.863045007                                 | 0.935734496                  | 0.330660403                  | 0.632039563                          | 382.8261444                              |
| 4.525496357                                 | 0.935581432                  | 0.400684838                  | 0.601112865                          | 254.2994569                              |
| 4.534833557                                 | 0.918744653                  | 0.332117191                  | 0.63713242                           | 244.7100062                              |
| 5.878859282                                 | 0.926118577                  | 0.327572838                  | 0.59030834                           | 371.6352663                              |
| 6.072011389                                 | 0.931253989                  | 0.360786841                  | 0.626199189                          | 343.3666202                              |
| 10.5552342                                  | 0.936506802                  | 0.339335682                  | 0.57761632                           | 690.2868195                              |
| 9.482859075                                 | 0.922893601                  | 0.292684438                  | 0.59682733                           | 465.0592553                              |
| 5.766421605                                 | 0.925433096                  | 0.319029917                  | 0.63066891                           | 328.303926                               |
| 2.925187972                                 | 0.916595597                  | 0.468486676                  | 0.641413218                          | 73.31888703                              |
| 5.452446034                                 | 0.92847699                   | 0.318753752                  | 0.658032789                          | 439.998862                               |
| 3.737174501                                 | 0.926280348                  | 0.384506244                  | 0.70037527                           | 146.1870962                              |
| 6.700169863                                 | 0.923099903                  | 0.326436561                  | 0.674119269                          | 301.7541829                              |
| 3.998808921                                 | 0.934363415                  | 0.370196632                  | 0.663944427                          | 294.1645216                              |
| 2.353730163                                 | 0.874185864                  | 0.387871515                  | 0.537066309                          | 56.76752509                              |
| 4.20917718                                  | 0.922705105                  | 0.396853683                  | 0.66869635                           | 214.6659617                              |
| 4.90524997                                  | 0.930501231                  | 0.352246655                  | 0.643376324                          | 315.4872577                              |
| 6.431650373                                 | 0.914008148                  | 0.303767037                  | 0.589743971                          | 307.5628064                              |
| 5.165248561                                 | 0.916253769                  | 0.342114193                  | 0.592303345                          | 261.3221601                              |
| 5.154149581                                 | 0.932826108                  | 0.355636586                  | 0.615410207                          | 363.0015341                              |
| 3.694054212                                 | 0.933349185                  | 0.385432865                  | 0.67731667                           | 216.7535049                              |
| 19.4571767                                  | 0.896196123                  | 0.197436188                  | 0.562801755                          | 612.9952444                              |
| 2.759833701                                 | 0.939489958                  | 0.43802884                   | 0.682139501                          | 294.630194                               |
| 2.568561396                                 | 0.914993625                  | 0.410949327                  | 0.741928748                          | 102.443332                               |
| 2.641229104                                 | 0.92474977                   | 0.465852978                  | 0.668707133                          | 84.51930177                              |
| 11.19286921                                 | 0.897720032                  | 0.221409644                  | 0.602141992                          | 403.3191731                              |

| log.sigma.3.5.mm.3D_glc_m_SumEntropy | log.sigma.3.5.mm.3D_glc_m_AverageIntensity | log.sigma.3.5.mm.3D_glc_m_Energy | log.sigma.3.5.mm.3D_glc_m_SumSquares | log.sigma.3.5.mm.3D_glc_m_ClusterProminence |
|--------------------------------------|--------------------------------------------|----------------------------------|--------------------------------------|---------------------------------------------|
| 5.079625792                          | 14.22302639                                | 0.008617034                      | 24.77519677                          | 18113.2633                                  |
| 4.812263192                          | 13.93443955                                | 0.010449981                      | 16.60648971                          | 9613.246428                                 |
| 4.929051758                          | 13.5694467                                 | 0.007277374                      | 19.81654201                          | 12082.64205                                 |
| 4.791991985                          | 13.72258569                                | 0.010989589                      | 15.22982855                          | 8566.999891                                 |
| 4.490598251                          | 10.00849677                                | 0.021922427                      | 13.47920439                          | 6443.789795                                 |
| 4.592780893                          | 11.6117925                                 | 0.013562463                      | 12.45353847                          | 6299.721475                                 |
| 4.200907742                          | 8.828776263                                | 0.035155491                      | 9.866861459                          | 3572.852478                                 |
| 4.888153717                          | 17.56350818                                | 0.011446103                      | 17.95376232                          | 13334.17846                                 |
| 4.901901645                          | 15.90007856                                | 0.008970301                      | 18.42718516                          | 10033.51188                                 |
| 4.969380397                          | 20.90674436                                | 0.007312406                      | 18.20392085                          | 13914.62996                                 |
| 4.436451423                          | 14.41077765                                | 0.016356112                      | 9.586242774                          | 3484.800062                                 |
| 4.881564314                          | 14.63363361                                | 0.007727572                      | 17.26886965                          | 10029.65224                                 |
| 4.498173266                          | 14.93512908                                | 0.017723572                      | 10.73053902                          | 5222.602773                                 |
| 4.733836438                          | 11.81407976                                | 0.009256599                      | 13.513645                            | 5821.521157                                 |
| 4.996106578                          | 14.30216241                                | 0.007179743                      | 22.10581569                          | 16100.55172                                 |
| 4.946075704                          | 19.43068455                                | 0.012663394                      | 19.42957018                          | 16498.32531                                 |
| 4.746743956                          | 18.48540682                                | 0.012140332                      | 15.6520945                           | 12565.42988                                 |
| 4.756901268                          | 17.13017887                                | 0.012133874                      | 15.01241878                          | 8181.913189                                 |
| 4.741961712                          | 16.2413934                                 | 0.009395569                      | 15.33378656                          | 6856.746274                                 |
| 4.82627918                           | 15.33008142                                | 0.010834866                      | 15.67367881                          | 9470.356981                                 |
| 4.891957662                          | 17.26874572                                | 0.007681221                      | 17.58821827                          | 12085.74694                                 |
| 4.892504423                          | 19.19377333                                | 0.009019111                      | 16.49777624                          | 12509.55172                                 |
| 4.962825692                          | 16.08723192                                | 0.007591527                      | 18.51345311                          | 11436.09976                                 |
| 4.89496008                           | 14.98323443                                | 0.012006312                      | 19.08488575                          | 12395.99254                                 |
| 5.032289372                          | 14.30594059                                | 0.005914221                      | 21.13762125                          | 12141.37928                                 |
| 5.027262188                          | 20.69396105                                | 0.006735461                      | 22.47398744                          | 19747.00769                                 |
| 4.849884181                          | 13.6777729                                 | 0.00985536                       | 16.08739921                          | 8609.081189                                 |
| 4.949591924                          | 17.16930897                                | 0.006282273                      | 20.2263311                           | 12115.17311                                 |
| 4.73450542                           | 17.28430176                                | 0.01241801                       | 15.32798619                          | 10932.57751                                 |
| 4.75578267                           | 18.43718158                                | 0.010325222                      | 15.50686777                          | 10998.89217                                 |
| 4.923029196                          | 20.34078013                                | 0.008353292                      | 17.57360274                          | 14306.63778                                 |
| 4.891005493                          | 16.73469921                                | 0.008278168                      | 16.79279244                          | 10669.87078                                 |
| 4.841731534                          | 19.26820334                                | 0.011435578                      | 17.66758709                          | 19898.14905                                 |
| 4.61075899                           | 12.48493896                                | 0.0189558                        | 17.50613935                          | 7543.456525                                 |
| 4.885762354                          | 16.55366603                                | 0.008790113                      | 19.76083216                          | 12283.08407                                 |
| 4.68552266                           | 17.12098939                                | 0.012395699                      | 13.51453027                          | 6625.258734                                 |
| 5.095867904                          | 19.92008158                                | 0.006649796                      | 23.12881842                          | 22634.55724                                 |
| 4.672602428                          | 21.10759688                                | 0.01574255                       | 12.91029275                          | 8103.445175                                 |
| 4.40041685                           | 13.26920423                                | 0.019701879                      | 9.11926551                           | 3488.407879                                 |
| 4.682294374                          | 12.12496292                                | 0.014516158                      | 14.45488853                          | 8057.133643                                 |
| 4.612774006                          | 13.69179053                                | 0.010093414                      | 12.25814179                          | 4376.227493                                 |
| 4.637367093                          | 12.89135933                                | 0.012240761                      | 12.6948015                           | 4940.735554                                 |
| 4.631009006                          | 16.88754431                                | 0.01378539                       | 12.76305573                          | 5351.614919                                 |
| 4.61973412                           | 11.88850269                                | 0.015872343                      | 14.48191661                          | 8450.057207                                 |
| 5.093832289                          | 22.50452755                                | 0.007835363                      | 23.5124061                           | 23602.28322                                 |
| 4.97060329                           | 15.21947772                                | 0.007431733                      | 17.81293413                          | 10855.78571                                 |
| 4.957915358                          | 18.28475074                                | 0.008454133                      | 19.03845089                          | 17335.59751                                 |
| 4.645519513                          | 19.63853784                                | 0.013051917                      | 16.37452114                          | 13298.65788                                 |
| 4.41988852                           | 9.349782109                                | 0.024094425                      | 12.31750886                          | 4310.573213                                 |
| 4.640283363                          | 11.91113478                                | 0.017925175                      | 15.47135422                          | 10151.53357                                 |
| 4.626587337                          | 16.82080113                                | 0.016038461                      | 13.04872487                          | 7364.413858                                 |
| 4.271150754                          | 17.68228768                                | 0.024343149                      | 9.52075785                           | 6056.649476                                 |
| 4.736289779                          | 14.50026418                                | 0.012990712                      | 14.75490345                          | 7920.861133                                 |
| 4.76562209                           | 19.78072638                                | 0.008492223                      | 15.44002329                          | 7264.368832                                 |
| 4.902226557                          | 16.32094931                                | 0.008181615                      | 17.39412402                          | 9948.867476                                 |
| 5.043472353                          | 17.64015999                                | 0.006744657                      | 22.00040775                          | 16019.33291                                 |
| 5.052602312                          | 25.86922748                                | 0.008145582                      | 22.33882635                          | 23990.95278                                 |
| 4.535781925                          | 14.15315543                                | 0.023527167                      | 15.04307004                          | 10386.59012                                 |
| 4.81903405                           | 19.00852193                                | 0.008721568                      | 17.10465492                          | 11703.38976                                 |
| 4.158245029                          | 10.52325742                                | 0.018248626                      | 6.249732275                          | 1240.420259                                 |
| 4.909108755                          | 17.39429041                                | 0.010159149                      | 17.82971632                          | 9393.81502                                  |
| 4.865594452                          | 21.28722472                                | 0.011523687                      | 17.32717721                          | 15638.36504                                 |
| 4.865136531                          | 17.85016705                                | 0.009086778                      | 17.29253944                          | 11524.90984                                 |
| 4.842962182                          | 16.09173148                                | 0.007113012                      | 16.31039882                          | 8038.138789                                 |
| 4.638388499                          | 10.94109088                                | 0.009357554                      | 13.9343102                           | 4288.328095                                 |
| 4.947072964                          | 14.6313507                                 | 0.008840131                      | 22.64614999                          | 15789.37525                                 |
| 4.889613191                          | 12.89696149                                | 0.01160324                       | 21.46917752                          | 17659.16276                                 |
| 4.98161416                           | 17.817379                                  | 0.008523897                      | 19.6952058                           | 12850.06177                                 |
| 4.675153304                          | 16.41140658                                | 0.011812125                      | 13.08445315                          | 5930.217341                                 |
| 4.992514411                          | 22.1921577                                 | 0.008646035                      | 19.91513424                          | 16873.40831                                 |
| 5.269460265                          | 21.66871782                                | 0.004745708                      | 27.28131546                          | 25289.71146                                 |
| 4.566560794                          | 16.31278425                                | 0.015698442                      | 13.65967633                          | 6890.770226                                 |
| 4.952105458                          | 16.53468866                                | 0.009150921                      | 18.62776351                          | 13834.52526                                 |
| 4.751173014                          | 19.56011881                                | 0.009252158                      | 14.2231471                           | 8330.561927                                 |
| 5.157075597                          | 19.80166315                                | 0.007113047                      | 23.85214749                          | 24527.82671                                 |
| 4.931863619                          | 19.3527291                                 | 0.009252585                      | 19.77435945                          | 19296.51107                                 |
| 4.546221644                          | 15.74544188                                | 0.014870304                      | 11.72552039                          | 6393.707209                                 |
| 4.800061843                          | 15.34190859                                | 0.009106022                      | 15.7910515                           | 8412.087905                                 |
| 4.804077485                          | 19.13574007                                | 0.009576036                      | 16.55524664                          | 11613.04742                                 |
| 4.808677874                          | 18.33016894                                | 0.011527305                      | 17.05735496                          | 13583.07228                                 |
| 4.937255487                          | 26.13866284                                | 0.010533583                      | 23.0261737                           | 32577.35353                                 |
| 5.13227033                           | 21.3558729                                 | 0.006707029                      | 24.63946063                          | 27323.2868                                  |
| 4.933824948                          | 17.86959337                                | 0.007861698                      | 18.53279905                          | 12788.40932                                 |
| 4.113838427                          | 8.230891784                                | 0.029943766                      | 8.616243329                          | 2055.466424                                 |
| 4.989848981                          | 20.78232934                                | 0.007231552                      | 18.58589384                          | 13730.31134                                 |
| 4.75060592                           | 11.68189051                                | 0.010452559                      | 13.85844604                          | 6274.767032                                 |
| 5.07801119                           | 17.01221869                                | 0.00853023                       | 22.96814443                          | 19105.79535                                 |
| 4.707696734                          | 16.9475571                                 | 0.011715086                      | 14.08664629                          | 6164.937334                                 |
| 4.126524756                          | 7.241425683                                | 0.020179822                      | 8.04367184                           | 1169.188719                                 |
| 4.604406419                          | 14.32257696                                | 0.018005244                      | 14.03457888                          | 8589.462721                                 |
| 4.797647126                          | 17.56823186                                | 0.009695078                      | 15.91418635                          | 7365.526778                                 |
| 4.915266938                          | 17.28405503                                | 0.007811782                      | 19.00707903                          | 10907.09308                                 |
| 4.719404596                          | 15.89956253                                | 0.010326136                      | 14.51238274                          | 8463.076085                                 |
| 4.734651879                          | 18.89071799                                | 0.01174779                       | 14.82930367                          | 10604.64538                                 |
| 4.729504068                          | 14.43575871                                | 0.011016746                      | 13.03485386                          | 6176.630299                                 |
| 5.569478285                          | 24.4311414                                 | 0.003823455                      | 53.1834269                           | 85323.4141                                  |
| 4.376742728                          | 16.98213117                                | 0.021169609                      | 9.573618544                          | 4173.615685                                 |
| 4.540723526                          | 9.630561937                                | 0.017875277                      | 12.90800743                          | 4724.551791                                 |
| 4.249719919                          | 8.880217922                                | 0.028261766                      | 8.426825363                          | 2703.597863                                 |
| 5.391352861                          | 19.6973113                                 | 0.003977446                      | 35.95518904                          | 42385.68374                                 |

| log.sigma.3.5.mm.3D_glc_m_SumAverage | log.sigma.3.5.mm.3D_glc_m_lmc2 | log.sigma.3.5.mm.3D_glc_m_lmc1 | log.sigma.3.5.mm.3D_glc_m_DifferenceAverage | log.sigma.3.5.mm.3D_glc_m_Id |
|--------------------------------------|--------------------------------|--------------------------------|---------------------------------------------|------------------------------|
| 28.31751394                          | 0.90251653                     | -0.20482588                    | 2.77068594                                  | 0.413377884                  |
| 27.83503259                          | 0.831137519                    | -0.154818974                   | 2.449822474                                 | 0.431903333                  |
| 27.11606729                          | 0.832488105                    | -0.147703862                   | 3.032075721                                 | 0.3816147                    |
| 27.42131652                          | 0.82529551                     | -0.153915289                   | 2.337074035                                 | 0.435478785                  |
| 20.01699355                          | 0.891640418                    | -0.228064504                   | 1.894572001                                 | 0.495963954                  |
| 23.223585                            | 0.81746793                     | -0.154088186                   | 2.190200138                                 | 0.452824762                  |
| 17.65755253                          | 0.887451603                    | -0.247730615                   | 1.458194517                                 | 0.554617779                  |
| 35.01273601                          | 0.881658186                    | -0.193452056                   | 2.301859627                                 | 0.442284789                  |
| 31.69466011                          | 0.85390455                     | -0.164966531                   | 2.512653063                                 | 0.427771786                  |
| 41.57180551                          | 0.809405921                    | -0.136344603                   | 2.759124293                                 | 0.392635784                  |
| 28.82155529                          | 0.813407368                    | -0.161262034                   | 1.854200426                                 | 0.489785038                  |
| 29.23517741                          | 0.801973958                    | -0.13407151                    | 2.797441747                                 | 0.391234957                  |
| 29.82889521                          | 0.815091525                    | -0.160478213                   | 1.879098779                                 | 0.491802974                  |
| 23.62815952                          | 0.795868851                    | -0.136978795                   | 2.413383028                                 | 0.421134292                  |
| 28.48985501                          | 0.845037549                    | -0.162201536                   | 2.929702508                                 | 0.40268741                   |
| 38.63810969                          | 0.845731286                    | -0.161962992                   | 2.587177205                                 | 0.449198341                  |
| 36.8304349                           | 0.839482023                    | -0.166990092                   | 2.400023275                                 | 0.438017958                  |
| 34.09899054                          | 0.853272397                    | -0.17791784                    | 2.143327676                                 | 0.460422797                  |
| 32.39112167                          | 0.83052244                     | -0.160007127                   | 2.599558632                                 | 0.411869183                  |
| 30.63520152                          | 0.839269103                    | -0.162670672                   | 2.252055457                                 | 0.44463128                   |
| 34.27196067                          | 0.737015477                    | -0.105650356                   | 2.795484247                                 | 0.398535908                  |
| 38.16603203                          | 0.844405488                    | -0.163635055                   | 2.507843114                                 | 0.417348155                  |
| 32.06236084                          | 0.79820742                     | -0.131880926                   | 2.659438487                                 | 0.403407705                  |
| 29.93504043                          | 0.907238139                    | -0.22663569                    | 2.342800583                                 | 0.443758917                  |
| 28.5899742                           | 0.794821847                    | -0.127608089                   | 2.930300647                                 | 0.386114209                  |
| 41.11845763                          | 0.852440947                    | -0.157980838                   | 3.174144574                                 | 0.377052836                  |
| 27.32335305                          | 0.856194209                    | -0.173838551                   | 2.28139743                                  | 0.439634566                  |
| 34.11093599                          | 0.734274322                    | -0.100648246                   | 3.196120127                                 | 0.362176264                  |
| 34.40744805                          | 0.797353568                    | -0.143580011                   | 2.430466341                                 | 0.437758202                  |
| 36.6765833                           | 0.778379505                    | -0.125524573                   | 2.662493183                                 | 0.420546822                  |
| 40.45448235                          | 0.811653405                    | -0.140096669                   | 2.597717955                                 | 0.416899006                  |
| 33.31042479                          | 0.797242692                    | -0.135449274                   | 2.493633806                                 | 0.420827078                  |
| 38.3996409                           | 0.852589641                    | -0.172890062                   | 2.374098396                                 | 0.435332786                  |
| 24.96987791                          | 0.91960119                     | -0.256324375                   | 2.476395098                                 | 0.455391644                  |
| 32.98423798                          | 0.876393906                    | -0.183058684                   | 2.920177058                                 | 0.397579775                  |
| 34.14943973                          | 0.795148097                    | -0.137978854                   | 2.300803725                                 | 0.4471749                    |
| 39.57531206                          | 0.805221109                    | -0.130583988                   | 3.089538698                                 | 0.382501071                  |
| 42.02489695                          | 0.771941402                    | -0.125211885                   | 2.400198236                                 | 0.430289101                  |
| 26.53840846                          | 0.843896671                    | -0.193914357                   | 1.696476947                                 | 0.50794294                   |
| 24.24365354                          | 0.865751825                    | -0.189592696                   | 2.067274994                                 | 0.467967226                  |
| 27.38358107                          | 0.76499006                     | -0.122724652                   | 2.524898793                                 | 0.412149758                  |
| 25.78280761                          | 0.811630179                    | -0.151430554                   | 2.185208906                                 | 0.455759343                  |
| 33.71301503                          | 0.831070931                    | -0.162141159                   | 2.052554109                                 | 0.472158469                  |
| 23.75921268                          | 0.851157591                    | -0.180855657                   | 2.163918549                                 | 0.467487445                  |
| 44.79604807                          | 0.832777407                    | -0.149564613                   | 3.066001759                                 | 0.408017903                  |
| 30.41152382                          | 0.830131005                    | -0.149911132                   | 2.473548092                                 | 0.415436488                  |
| 36.31913866                          | 0.813639614                    | -0.140130704                   | 2.702554511                                 | 0.41146379                   |
| 39.01303007                          | 0.807654976                    | -0.14336807                    | 2.617650047                                 | 0.42538154                   |
| 18.69956422                          | 0.921651986                    | -0.279126109                   | 1.898600083                                 | 0.491915046                  |
| 23.79077838                          | 0.889234327                    | -0.213767164                   | 2.088386154                                 | 0.471583757                  |
| 33.56040431                          | 0.846393885                    | -0.176449965                   | 1.924299851                                 | 0.487942178                  |
| 35.3237826                           | 0.799437614                    | -0.15489042                    | 1.909181122                                 | 0.501804564                  |
| 28.95798641                          | 0.851370897                    | -0.17623452                    | 2.02829531                                  | 0.468252484                  |
| 39.32370344                          | 0.824158849                    | -0.151641616                   | 2.745727139                                 | 0.398649585                  |
| 32.50366456                          | 0.800766876                    | -0.133679222                   | 2.598575556                                 | 0.411113749                  |
| 35.0118598                           | 0.820284704                    | -0.139231502                   | 3.104965253                                 | 0.380965755                  |
| 51.52796403                          | 0.840823021                    | -0.154893289                   | 2.884340213                                 | 0.402184365                  |
| 28.24525405                          | 0.87156988                     | -0.202463532                   | 1.935343368                                 | 0.507376303                  |
| 37.89316738                          | 0.819962857                    | -0.144419976                   | 2.773994045                                 | 0.399748751                  |
| 21.04651484                          | 0.732400764                    | -0.12428423                    | 1.746546428                                 | 0.485813521                  |
| 34.66083405                          | 0.867426095                    | -0.179317495                   | 2.280687648                                 | 0.451279084                  |
| 42.42242018                          | 0.813509954                    | -0.145098562                   | 2.499286915                                 | 0.440126677                  |
| 35.49775609                          | 0.824032895                    | -0.149474195                   | 2.605271525                                 | 0.418277235                  |
| 32.16956007                          | 0.782488371                    | -0.124349915                   | 2.824940292                                 | 0.382440055                  |
| 21.88218177                          | 0.847758821                    | -0.171134854                   | 2.682513162                                 | 0.405859172                  |
| 29.13176869                          | 0.861279608                    | -0.171172013                   | 2.726109799                                 | 0.405503534                  |
| 25.72457987                          | 0.904741242                    | -0.216791828                   | 2.374592362                                 | 0.438863801                  |
| 35.48861832                          | 0.840332683                    | -0.155353679                   | 2.543242855                                 | 0.425105852                  |
| 32.81115819                          | 0.845717412                    | -0.173542655                   | 2.218360834                                 | 0.450639124                  |
| 44.26698857                          | 0.838758732                    | -0.155954075                   | 2.724802958                                 | 0.413647495                  |
| 43.12878549                          | 0.824186584                    | -0.136964556                   | 3.245811229                                 | 0.372485084                  |
| 32.515186                            | 0.847481303                    | -0.178739428                   | 2.118370462                                 | 0.461912986                  |
| 32.89211198                          | 0.832245355                    | -0.152913483                   | 2.462702373                                 | 0.430372169                  |
| 38.9195729                           | 0.737675089                    | -0.109528674                   | 2.549832007                                 | 0.41599728                   |
| 39.39952723                          | 0.853943665                    | -0.160300963                   | 2.800763601                                 | 0.403104787                  |
| 38.47041906                          | 0.841949935                    | -0.156855698                   | 2.767115748                                 | 0.408552944                  |
| 31.45473119                          | 0.805539064                    | -0.149311129                   | 2.130401283                                 | 0.467693069                  |
| 30.64420867                          | 0.839360354                    | -0.163116998                   | 2.537929113                                 | 0.411782879                  |
| 38.05105929                          | 0.771091485                    | -0.124101104                   | 2.715826891                                 | 0.407327799                  |
| 36.48588064                          | 0.793746861                    | -0.133431277                   | 2.524857694                                 | 0.433728227                  |
| 52.03201886                          | 0.887098165                    | -0.191540421                   | 2.994340238                                 | 0.413602523                  |
| 42.42148196                          | 0.825683101                    | -0.138190129                   | 3.31088234                                  | 0.375204821                  |
| 35.59575443                          | 0.808282016                    | -0.136603475                   | 2.734541309                                 | 0.400839908                  |
| 16.46178357                          | 0.880674263                    | -0.246160412                   | 1.695302714                                 | 0.522422146                  |
| 41.3541947                           | 0.806921182                    | -0.136400366                   | 2.686856897                                 | 0.400751395                  |
| 23.36378102                          | 0.826836922                    | -0.154415613                   | 2.117014626                                 | 0.455992507                  |
| 33.85540063                          | 0.883838475                    | -0.186473534                   | 2.76452146                                  | 0.405809668                  |
| 33.76883942                          | 0.821400776                    | -0.154907524                   | 2.224826251                                 | 0.444279773                  |
| 14.48285137                          | 0.859091097                    | -0.225133978                   | 2.062291092                                 | 0.459141728                  |
| 28.64515393                          | 0.902943964                    | -0.236030364                   | 2.162615709                                 | 0.464120868                  |
| 34.96001399                          | 0.799861751                    | -0.134998678                   | 2.453274688                                 | 0.428578889                  |
| 34.44482657                          | 0.847136789                    | -0.159402268                   | 2.918208149                                 | 0.387261938                  |
| 31.79525783                          | 0.791261391                    | -0.13365952                    | 2.546009788                                 | 0.42055531                   |
| 37.62508034                          | 0.773056415                    | -0.127370458                   | 2.445308043                                 | 0.430709935                  |
| 28.84513164                          | 0.809225173                    | -0.146776394                   | 2.114827917                                 | 0.45666559                   |
| 48.27416402                          | 0.929777174                    | -0.210509595                   | 5.259636912                                 | 0.285576752                  |
| 33.94871756                          | 0.835409897                    | -0.181089984                   | 1.768598526                                 | 0.499257695                  |
| 19.26112387                          | 0.924642091                    | -0.276815733                   | 1.891547259                                 | 0.476909427                  |
| 17.76043584                          | 0.857551642                    | -0.206374782                   | 1.666155379                                 | 0.522395701                  |
| 39.06072771                          | 0.88289732                     | -0.168035478                   | 4.155609673                                 | 0.313419919                  |

| log.sigma.3.5.mm.3D_glcm_ClusterTendency | log.sigma.3.5.mm.3D_firstorder_InterquartileRange | log.sigma.3.5.mm.3D_firstorder_Skewness | log.sigma.3.5.mm.3D_firstorder_Uniformity |
|------------------------------------------|---------------------------------------------------|-----------------------------------------|-------------------------------------------|
| 81.08740024                              | 159.4445572                                       | 0.371767347                             | 0.064328649                               |
| 54.3157391                               | 131.9176903                                       | 0.226474982                             | 0.077179                                  |
| 62.3337737                               | 143.0646076                                       | -0.31110029                             | 0.068844186                               |
| 50.25593974                              | 116.6431217                                       | 0.271704282                             | 0.079770372                               |
| 46.62483921                              | 107.0591221                                       | 0.799255771                             | 0.103025646                               |
| 40.90856924                              | 95.45339084                                       | 0.437639985                             | 0.092143103                               |
| 35.11668211                              | 109.3116407                                       | 0.816887913                             | 0.126993177                               |
| 60.75446884                              | 125.0796852                                       | 0.136151755                             | 0.075702611                               |
| 59.65912271                              | 148.7620602                                       | 0.283772012                             | 0.071283115                               |
| 61.51857473                              | 139.8857803                                       | -0.239472423                            | 0.066588201                               |
| 31.7648866                               | 95.8433075                                        | 0.203784936                             | 0.100776694                               |
| 54.59128361                              | 123.4206924                                       | -0.158392106                            | 0.071390256                               |
| 35.00184837                              | 86.74845505                                       | 0.457695539                             | 0.10209288                                |
| 44.05090827                              | 115.5589104                                       | -0.183315714                            | 0.078321308                               |
| 69.0963886                               | 151.8266538                                       | 0.547509569                             | 0.064800626                               |
| 65.2741441                               | 126.0441561                                       | -0.07660995                             | 0.075227076                               |
| 50.81606125                              | 102.5000233                                       | -0.450321585                            | 0.082740268                               |
| 49.88204296                              | 139.4855871                                       | 0.427710527                             | 0.08020859                                |
| 47.27132092                              | 131.6565938                                       | 0.062091917                             | 0.076899115                               |
| 52.66205591                              | 115.3335562                                       | -0.068549809                            | 0.078964201                               |
| 55.43785071                              | 128.9486175                                       | -0.344716571                            | 0.071134952                               |
| 55.9792958                               | 120.4713869                                       | -0.012709642                            | 0.07502199                                |
| 59.7301675                               | 127.2746699                                       | 0.051666724                             | 0.070567764                               |
| 65.4332869                               | 134.1637036                                       | 0.062259732                             | 0.076474691                               |
| 69.10459114                              | 156.4925337                                       | -0.270751979                            | 0.062115533                               |
| 72.83231659                              | 149.0319104                                       | 0.018385251                             | 0.063738577                               |
| 54.08243075                              | 130.1686726                                       | 0.38446395                              | 0.073880628                               |
| 61.4689591                               | 144.0723653                                       | -0.419327266                            | 0.066636401                               |
| 48.31937147                              | 105.4168692                                       | -0.325453898                            | 0.086057448                               |
| 48.44656349                              | 113.8950577                                       | -0.081635423                            | 0.077713114                               |
| 58.9293395                               | 127.4941587                                       | -0.601640473                            | 0.071534056                               |
| 54.25819632                              | 131.198966                                        | 0.095664897                             | 0.07179288                                |
| 60.22580824                              | 113.4130735                                       | -0.397712484                            | 0.079604762                               |
| 56.51015032                              | 162.284914                                        | 0.459990041                             | 0.088290593                               |
| 60.56384631                              | 124.4683315                                       | -0.363771514                            | 0.072290196                               |
| 42.4763836                               | 102.4435539                                       | -0.045256956                            | 0.087651097                               |
| 76.37819538                              | 143.0253668                                       | -0.202523479                            | 0.06189463                                |
| 42.42737579                              | 98.86332226                                       | -0.461027282                            | 0.087165612                               |
| 31.05534929                              | 91.79587159                                       | 0.180275482                             | 0.102808211                               |
| 49.51635154                              | 114.8478212                                       | 0.701254244                             | 0.088340128                               |
| 37.95562329                              | 114.4740868                                       | -0.021556768                            | 0.082040308                               |
| 41.64316493                              | 122.6842084                                       | 0.384329352                             | 0.083414777                               |
| 41.74378972                              | 116.3553381                                       | 0.213678                                | 0.087339154                               |
| 47.4270163                               | 107.2660961                                       | 0.846053785                             | 0.092372465                               |
| 76.99676171                              | 126.2014425                                       | -0.507913722                            | 0.067442462                               |
| 60.01906467                              | 135.7866909                                       | -0.248703528                            | 0.069178855                               |
| 63.26428605                              | 125.4617026                                       | -0.207495128                            | 0.070267343                               |
| 51.1617289                               | 98.88477755                                       | -1.016937958                            | 0.089060575                               |
| 42.33325484                              | 119.105653                                        | 0.551273918                             | 0.103258136                               |
| 52.10929661                              | 114.9664526                                       | 0.85668155                              | 0.0936773                                 |
| 43.3845991                               | 105.7560759                                       | 0.233384386                             | 0.09161067                                |
| 29.47026251                              | 70.3176384                                        | -0.335009878                            | 0.123079424                               |
| 50.18020906                              | 125.0458641                                       | 0.569649592                             | 0.081263509                               |
| 47.33804329                              | 127.5783424                                       | 0.042912793                             | 0.073707685                               |
| 55.63275752                              | 141.1874561                                       | 0.03493686                              | 0.070044721                               |
| 68.9942269                               | 141.9848394                                       | 0.018691038                             | 0.063773094                               |
| 72.92312495                              | 133.5269489                                       | -0.393397775                            | 0.068861416                               |
| 50.22387827                              | 92.43755364                                       | 0.973089624                             | 0.108249654                               |
| 53.23781871                              | 119.0631796                                       | -0.530582973                            | 0.075038887                               |
| 19.68626526                              | 79.35065079                                       | -0.322619125                            | 0.115639366                               |
| 59.35193606                              | 144.8379135                                       | 0.129687213                             | 0.072191037                               |
| 57.98399952                              | 112.1845484                                       | -0.4213772                              | 0.081509457                               |
| 54.56295292                              | 123.7417917                                       | -0.166887768                            | 0.07386512                                |
| 51.67305558                              | 143.8461852                                       | -0.29560121                             | 0.069837887                               |
| 42.81239118                              | 145.8400393                                       | 0.068090379                             | 0.073720195                               |
| 74.2129608                               | 163.8650465                                       | 0.675305462                             | 0.07000486                                |
| 72.94395257                              | 138.5872898                                       | 0.873869368                             | 0.076670324                               |
| 64.75200126                              | 140.0265608                                       | 0.281195179                             | 0.069121846                               |
| 42.68222282                              | 109.314045                                        | -0.204382046                            | 0.08442449                                |
| 66.13135317                              | 128.6256888                                       | -0.09660139                             | 0.070219818                               |
| 92.7812026                               | 177.0322953                                       | -0.343302846                            | 0.053953061                               |
| 43.69882187                              | 98.85364532                                       | 0.677800652                             | 0.09513784                                |
| 61.22840937                              | 128.994381                                        | 0.00167852                              | 0.072938748                               |
| 45.71120907                              | 116.5272408                                       | -0.420633598                            | 0.077190519                               |
| 81.93466625                              | 145.7287426                                       | -0.033272267                            | 0.062908362                               |
| 65.88227039                              | 136.97859                                         | -0.119650672                            | 0.07051637                                |
| 36.97153008                              | 91.20271635                                       | -0.246513623                            | 0.09540076                                |
| 50.98799993                              | 121.1414223                                       | -0.082448053                            | 0.07664327                                |
| 52.22672371                              | 113.9488064                                       | -0.357778331                            | 0.077287588                               |
| 54.84044362                              | 101.3019167                                       | -0.528953017                            | 0.082752217                               |
| 73.53574454                              | 106.4287665                                       | -0.656699831                            | 0.07851458                                |
| 81.42698599                              | 129.2909336                                       | -0.523688345                            | 0.066317036                               |
| 59.52836808                              | 127.7566819                                       | 0.030268906                             | 0.069864832                               |
| 28.35831458                              | 102.5322914                                       | 0.77518676                              | 0.121482548                               |
| 62.59551233                              | 138.0949917                                       | -0.384578103                            | 0.066100777                               |
| 47.13688124                              | 125.7263424                                       | 0.46344745                              | 0.078164829                               |
| 75.22995285                              | 135.6277986                                       | -0.037604278                            | 0.066622728                               |
| 45.30932989                              | 115.1635847                                       | 0.200302112                             | 0.084173187                               |
| 24.72456781                              | 123.2414646                                       | 0.130015161                             | 0.103853281                               |
| 47.04073915                              | 95.11804342                                       | -0.121051919                            | 0.09608362                                |
| 50.75441393                              | 133.2718859                                       | 0.432531776                             | 0.075609273                               |
| 58.92039264                              | 131.1830215                                       | -0.230644362                            | 0.069172212                               |
| 46.11259949                              | 106.2478476                                       | -0.735523405                            | 0.084475073                               |
| 47.64252953                              | 99.91771889                                       | -0.276058494                            | 0.084850925                               |
| 43.19157603                              | 111.0999479                                       | 0.127981482                             | 0.082154077                               |
| 169.5037172                              | 229.7536144                                       | -0.642763848                            | 0.045149055                               |
| 31.96779198                              | 78.21284199                                       | 0.089201503                             | 0.113553993                               |
| 45.13846022                              | 140.0921664                                       | 0.488675013                             | 0.085717093                               |
| 28.1637987                               | 80.90534043                                       | 0.634865039                             | 0.119001603                               |
| 116.3878882                              | 187.7868862                                       | -0.490940987                            | 0.049022464                               |

| log.sigma.3.5.mm.3D_firstorder_MeanAbsoluteDeviation | log.sigma.3.5.mm.3D_firstorder_Energy | log.sigma.3.5.mm.3D_firstorder_RobustMeanAbsoluteDeviation | log.sigma.3.5.mm.3D_firstorder_Median |
|------------------------------------------------------|---------------------------------------|------------------------------------------------------------|---------------------------------------|
| 97.55857007                                          | 33542088.59                           | 67.7506063                                                 | 90.95928192                           |
| 80.78671433                                          | 35790645.29                           | 55.57123089                                                | 70.75906372                           |
| 86.35290437                                          | 14235124.2                            | 58.96068474                                                | 39.63533783                           |
| 75.79255895                                          | 40569007.1                            | 50.1431866                                                 | 72.49908447                           |
| 73.07364111                                          | 12327852.79                           | 48.32065278                                                | 39.75455093                           |
| 65.79636366                                          | 17176580.64                           | 40.90248128                                                | 44.40237427                           |
| 65.90708496                                          | 10879315.29                           | 46.62289234                                                | 32.06729889                           |
| 82.36419583                                          | 38838894.25                           | 54.2812616                                                 | 85.37471008                           |
| 84.32666362                                          | 45455014.09                           | 59.42727416                                                | 93.06378937                           |
| 86.63302641                                          | 59620444.81                           | 58.51257369                                                | 84.24765778                           |
| 60.19134113                                          | 20357686.31                           | 40.65739901                                                | 62.41169357                           |
| 80.52727021                                          | 28199259                              | 52.96909833                                                | 79.85158539                           |
| 61.09711979                                          | 31655468.02                           | 37.97272724                                                | 52.78038788                           |
| 72.30323591                                          | 22488197.76                           | 49.07569122                                                | 60.43235779                           |
| 91.7281727                                           | 32307971.41                           | 62.22214613                                                | 69.90768814                           |
| 85.04259845                                          | 60063482.41                           | 55.28999006                                                | 39.0812912                            |
| 74.26478889                                          | 20163668.24                           | 45.03704598                                                | 51.31418228                           |
| 78.58358286                                          | 57598142.85                           | 56.57949374                                                | 99.03631973                           |
| 77.00534394                                          | 19888699.86                           | 54.34748054                                                | 79.72202682                           |
| 75.24757122                                          | 42291394.38                           | 49.92034417                                                | 61.91091156                           |
| 81.44712913                                          | 89194820.24                           | 53.72268701                                                | 46.72055244                           |
| 77.94352254                                          | 32777752.61                           | 51.14452323                                                | 68.06335449                           |
| 81.59371507                                          | 62074354.98                           | 53.98261018                                                | 57.73151398                           |
| 85.53055661                                          | 16735922.81                           | 58.65443523                                                | 47.91526604                           |
| 92.11529341                                          | 34627771.73                           | 65.67903502                                                | 29.57473469                           |
| 93.08979163                                          | 33978069.38                           | 62.3806377                                                 | 92.14130402                           |
| 79.31613006                                          | 32521992.45                           | 54.21555786                                                | 58.45519638                           |
| 87.50971021                                          | 52499812.7                            | 60.02100111                                                | 70.62361145                           |
| 72.79831145                                          | 48159979.02                           | 45.44572324                                                | 60.95070267                           |
| 77.02212043                                          | 47241305.2                            | 48.76981383                                                | 62.02251434                           |
| 82.01965578                                          | 70033245.88                           | 53.39042667                                                | 78.33899689                           |
| 80.86530771                                          | 105442804.4                           | 54.69781443                                                | 96.65000153                           |
| 79.08558047                                          | 42808402.2                            | 49.53583188                                                | 64.88784027                           |
| 90.13055991                                          | 10184028.31                           | 67.56597182                                                | 62.78485489                           |
| 81.48362853                                          | 12374489.68                           | 53.11095012                                                | 50.3175602                            |
| 68.76419861                                          | 39848666.59                           | 44.07514369                                                | 57.50198364                           |
| 95.0332415                                           | 81553484.75                           | 61.25945774                                                | 82.31538391                           |
| 68.46862938                                          | 44884650.33                           | 42.7638724                                                 | 69.50869751                           |
| 60.27236978                                          | 12588056.68                           | 38.94361518                                                | 36.230299                             |
| 74.87529531                                          | 28809372.65                           | 49.93428062                                                | 70.6103363                            |
| 70.20910827                                          | 18779306.77                           | 48.07650239                                                | 73.60151672                           |
| 72.95308161                                          | 30242257.14                           | 51.07654029                                                | 70.86377335                           |
| 70.50433377                                          | 44741263.27                           | 48.71386732                                                | 68.349617                             |
| 73.78475573                                          | 30571930.53                           | 47.97724809                                                | 62.31748962                           |
| 90.51366077                                          | 59923707.24                           | 56.4198541                                                 | 53.83592415                           |
| 82.36467931                                          | 55086855.56                           | 57.11426898                                                | 76.29389954                           |
| 84.33154429                                          | 66226837.19                           | 53.77822529                                                | 72.77885437                           |
| 74.61782944                                          | 16931608.93                           | 43.53633033                                                | 37.61011124                           |
| 71.49638897                                          | 7245650.555                           | 51.09353627                                                | 45.19065094                           |
| 76.87522831                                          | 18832108.23                           | 50.56621349                                                | 59.94028473                           |
| 69.81574357                                          | 58912153.35                           | 45.86747386                                                | 65.13095093                           |
| 53.16432054                                          | 17353743.86                           | 30.94741282                                                | 47.7912674                            |
| 77.15187187                                          | 75972739.66                           | 52.9355366                                                 | 83.55934143                           |
| 77.9667957                                           | 18243100.52                           | 52.79392068                                                | 71.49394989                           |
| 83.2075414                                           | 76976932.04                           | 57.90996167                                                | 86.82301331                           |
| 91.19490567                                          | 30842527.04                           | 60.26769973                                                | 48.93991852                           |
| 88.61383704                                          | 68607776.13                           | 57.23205153                                                | 77.39227295                           |
| 70.87382199                                          | 32473302.41                           | 43.45435017                                                | 40.04969978                           |
| 77.53613866                                          | 19677244.64                           | 50.49751269                                                | 65.29502106                           |
| 49.1606583                                           | 13456091.36                           | 33.61247088                                                | 76.06764984                           |
| 84.78849917                                          | 74276349.66                           | 60.58479354                                                | 103.9509354                           |
| 76.7976159                                           | 88671451.22                           | 48.20921159                                                | 65.43890381                           |
| 79.45604311                                          | 39927778.99                           | 52.18942486                                                | 79.45638275                           |
| 81.76696733                                          | 33312826.73                           | 58.77253816                                                | 89.49505615                           |
| 79.81478816                                          | 11664550.34                           | 59.48631777                                                | 96.80197906                           |
| 95.85340343                                          | 38355508.15                           | 68.0909937                                                 | 74.61985779                           |
| 88.38328301                                          | 21283042.75                           | 57.62047202                                                | 59.38552475                           |
| 87.56790555                                          | 85395203.76                           | 59.67796506                                                | 93.52014923                           |
| 69.2041437                                           | 16919608.2                            | 46.61791937                                                | 67.67376709                           |
| 85.53047486                                          | 43867335.58                           | 54.8542511                                                 | 61.0961647                            |
| 105.7869717                                          | 89650672.33                           | 74.32907706                                                | 86.51261902                           |
| 68.65617596                                          | 34486618.06                           | 43.56235232                                                | 75.26584625                           |
| 82.20204734                                          | 98135856.28                           | 54.2352206                                                 | 88.63629913                           |
| 75.03480565                                          | 97105241.9                            | 50.03705871                                                | 79.07852936                           |
| 94.61610738                                          | 97746748.49                           | 62.30013625                                                | 78.4240799                            |
| 88.07594972                                          | 43487287.16                           | 57.81778185                                                | 61.7232399                            |
| 63.20548364                                          | 24079891.24                           | 39.5090011                                                 | 51.96622086                           |
| 75.36211804                                          | 24888120.83                           | 51.15679193                                                | 88.07365417                           |
| 76.78696159                                          | 46884386.17                           | 48.55383393                                                | 65.67141342                           |
| 75.47123165                                          | 56508146.96                           | 45.31121232                                                | 48.44072723                           |
| 82.59455551                                          | 24300535.27                           | 47.90073708                                                | 59.08687973                           |
| 92.23021957                                          | 48021545.32                           | 56.57056287                                                | 59.09270859                           |
| 84.12608719                                          | 48075614.14                           | 55.14153893                                                | 78.62028503                           |
| 60.74785023                                          | 5320934.288                           | 43.35407779                                                | 45.59421539                           |
| 86.9348624                                           | 77110388.88                           | 58.12574923                                                | 88.81528854                           |
| 75.09928521                                          | 52470124.79                           | 52.83762668                                                | 66.35375595                           |
| 90.93857482                                          | 30795961.01                           | 58.41467194                                                | 76.28829956                           |
| 72.02036999                                          | 46665993.14                           | 49.12729882                                                | 70.71224976                           |
| 62.16801435                                          | 5521858.634                           | 50.10690782                                                | 88.70490265                           |
| 69.17468844                                          | 8240458.256                           | 42.46795869                                                | 62.47488594                           |
| 80.39354931                                          | 63902862.55                           | 56.57218123                                                | 83.48623657                           |
| 84.26734947                                          | 22107361.71                           | 56.09485173                                                | 86.92156982                           |
| 71.14566675                                          | 15708203.3                            | 45.66024334                                                | 46.22352409                           |
| 72.41035776                                          | 59221492.58                           | 43.82372358                                                | 60.34932327                           |
| 70.06284692                                          | 84725810.4                            | 46.80905294                                                | 94.39949799                           |
| 144.9151256                                          | 29514483.27                           | 99.23954908                                                | 59.39618301                           |
| 57.38873569                                          | 17945964.54                           | 36.09297569                                                | 54.71253967                           |
| 77.47449955                                          | 8307376.978                           | 58.6875094                                                 | 84.02301788                           |
| 55.66269206                                          | 7770392.831                           | 35.13996799                                                | 44.72021866                           |
| 119.9205658                                          | 29762936.76                           | 81.84817707                                                | 70.33759689                           |

| log.sigma.3.5.mm.3D_firstorder_TotalEnergy | log.sigma.3.5.mm.3D_firstorder_Maximum | log.sigma.3.5.mm.3D_firstorder_RootMeanSquared | log.sigma.3.5.mm.3D_firstorder_90Percentile | log.sigma.3.5.mm.3D_firstorder_Minimum |
|--------------------------------------------|----------------------------------------|------------------------------------------------|---------------------------------------------|----------------------------------------|
| 905636392.1                                | 516.3563843                            | 166.9791466                                    | 285.6572998                                 | -222.6165924                           |
| 966347422.9                                | 435.7878723                            | 133.7734004                                    | 233.9898178                                 | -238.5141754                           |
| 384348353.4                                | 353.6335754                            | 112.8391299                                    | 154.613829                                  | -293.8450623                           |
| 1095363192                                 | 452.1275635                            | 128.6022051                                    | 218.7006592                                 | -246.2638245                           |
| 332852025.4                                | 348.1614075                            | 113.9752658                                    | 217.6989594                                 | -150.5487518                           |
[truncated: 7,471,611 more chars]
